# Supplementary material for: Genome-wide protein-protein interactions and protein function exploration in cyanobacteria
Source: PubMed Central journal article supplement (PMC4614683; doi:10.1038/srep15519), 2015-10-22
Supplement: srep15519-s1.pdf [file srep15519-s1.pdf]

## **Genome-wide protein-protein interactions and protein function exploration in cyanobacteria**

Qi Lv<sup>†</sup>, Weimin Ma<sup>†</sup>, Hui Liu, Jiang Li, Huan Wang, Fang Lu, Chen Zhao & Tielu Shi\*

<sup>†</sup>These authors contributed equally to this work.

\*Corresponding author, E-mail, [tieliushi01@gmail.com](mailto:tieliushi01@gmail.com)

### **Affiliations**

Center for Bioinformatics and Computational Biology, and the Institute of Biomedical Sciences, School of Life Science, East China Normal University, 500 Dongchuan Road, Shanghai, 200241, China

Qi Lv, Hui Liu, Jiang Li, Huan Wang, Chen Zhao & Tielu Shi

College of Life and Environment Sciences, Shanghai Normal University, 100 Guilin Road, Shanghai, 200234, China

Weimin Ma & Fang Lu

The institute of plant physiology and ecology, Shanghai Institutes for Biological Sciences, Chinese Academy of Sciences, 300 Fenglin Road, Shanghai 200032, China

Tielu Shi

NdhO-NdhI

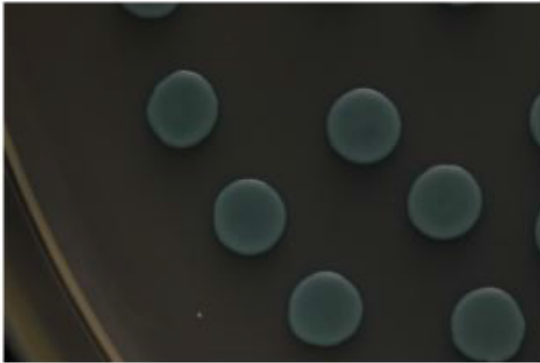

NdhB-GST

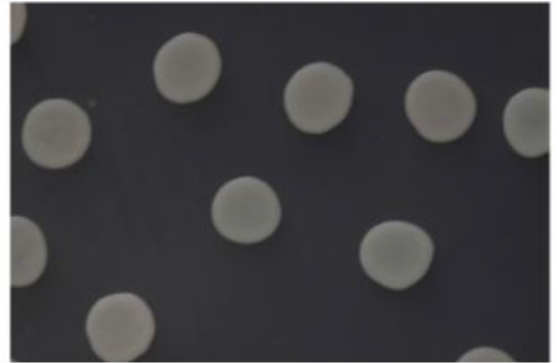

NdhB-NdhA

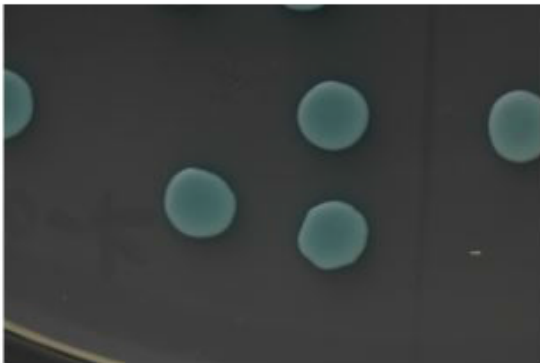

NdhH-GST

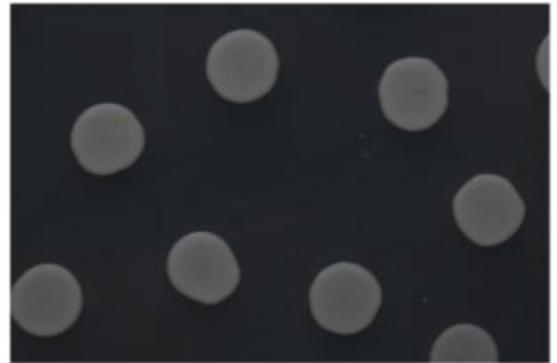

NdhH-NdhK

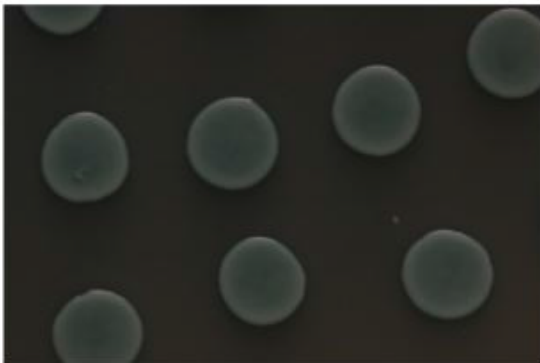

**Supplementary Figure S1** Full views of yeast two-hybrid results in Figure 2.

**A**

NdhH

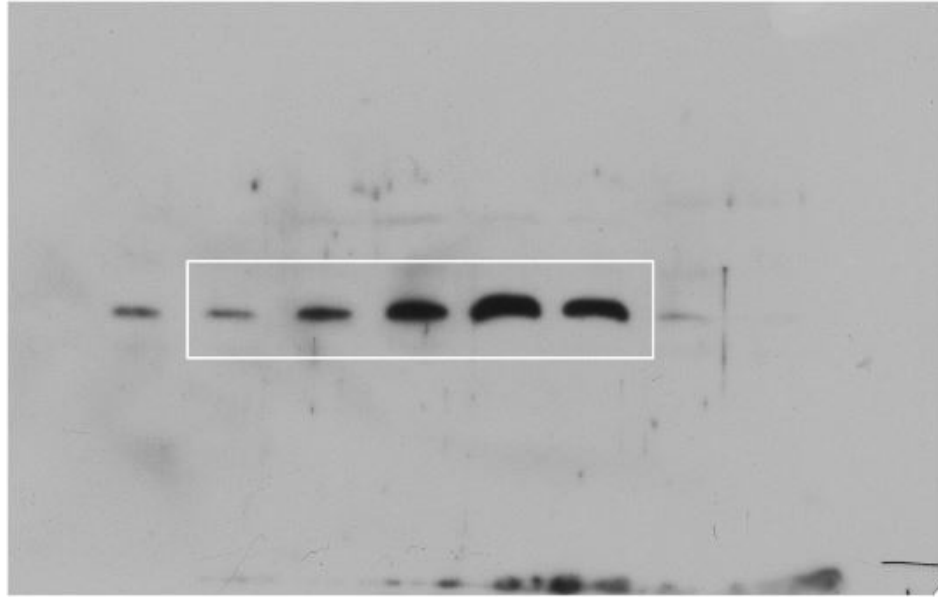ATP $\beta$ 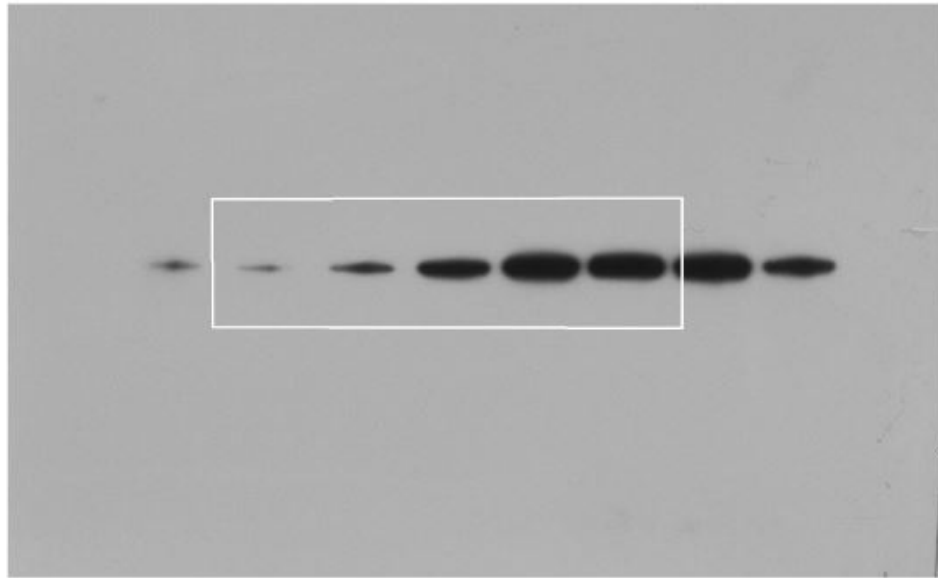**B**

NdhA

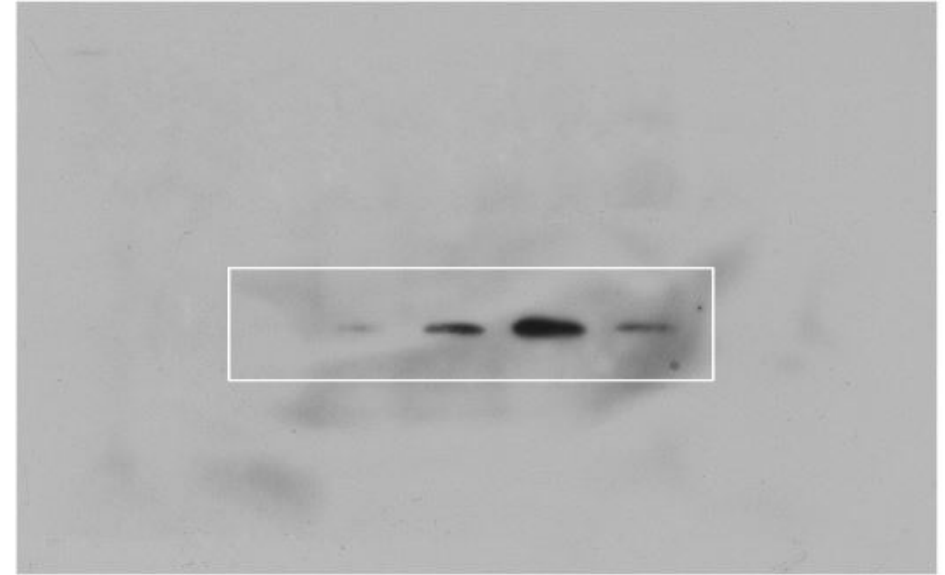ATP $\beta$ 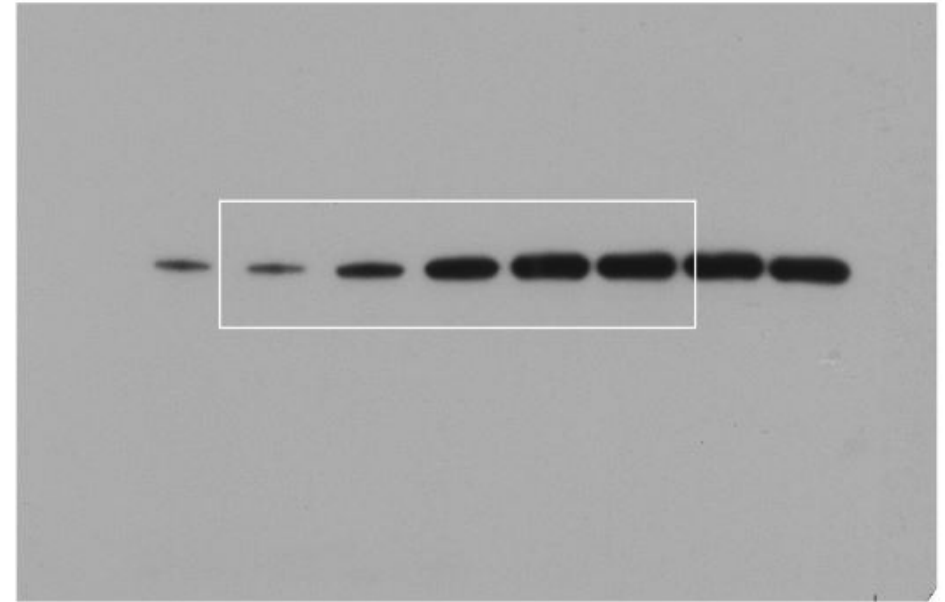

**Supplementary Figure S2** Full views of western blots. Rectangles delimit cropped areas used in the indicated Figure 3.

1,421 bp →

503 bp →

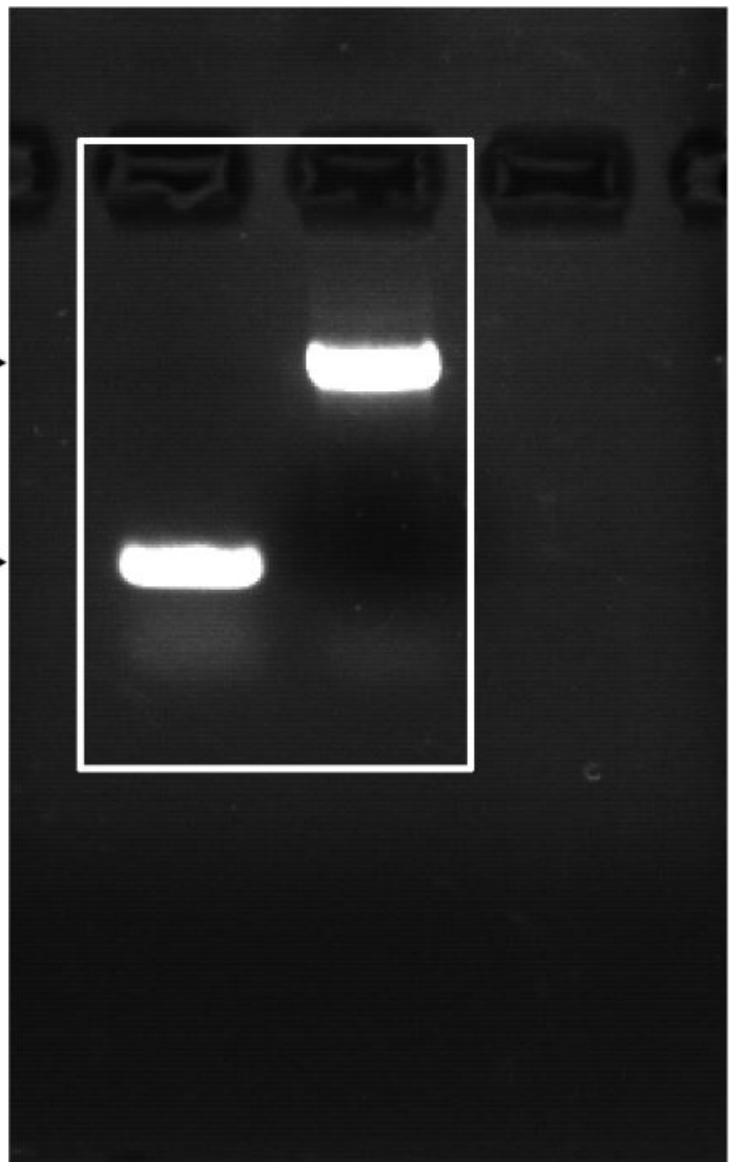

**Supplementary Figure S3** Full views of DNA electrophoresis gels. Rectangles delimit cropped areas used in the indicated Figure 4.

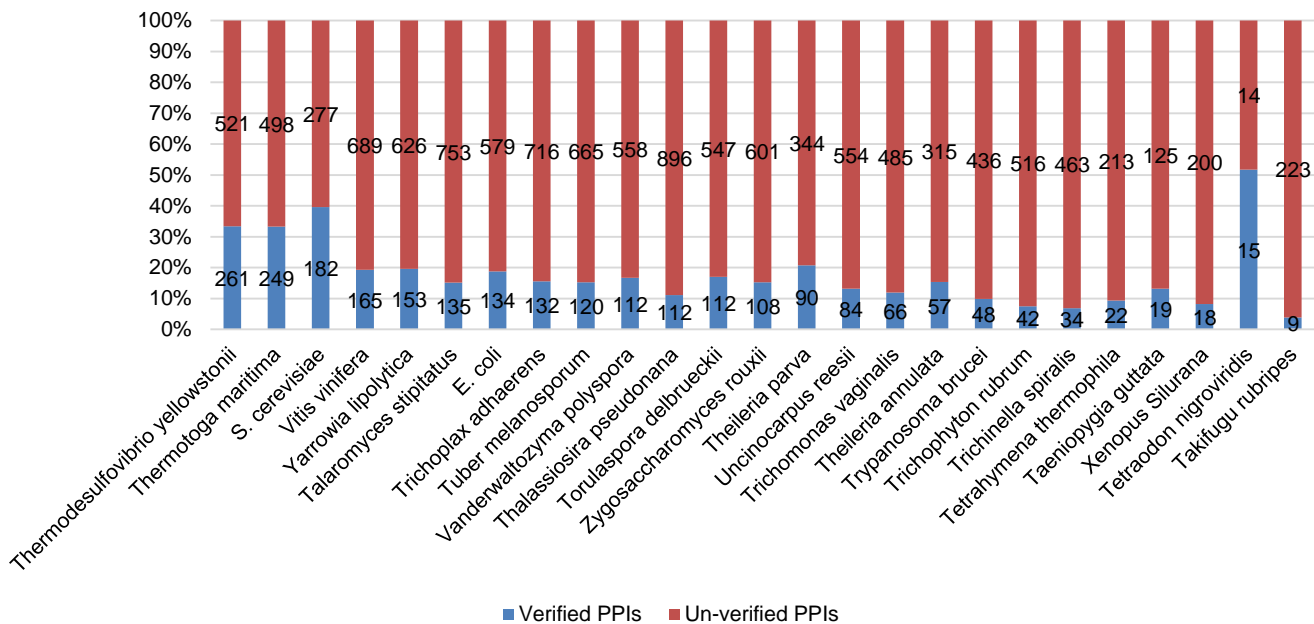

**Supplementary Figure S4** Interolog verification of interactions based on conserved proteins among 25 organisms.

PURINE METABOLISM

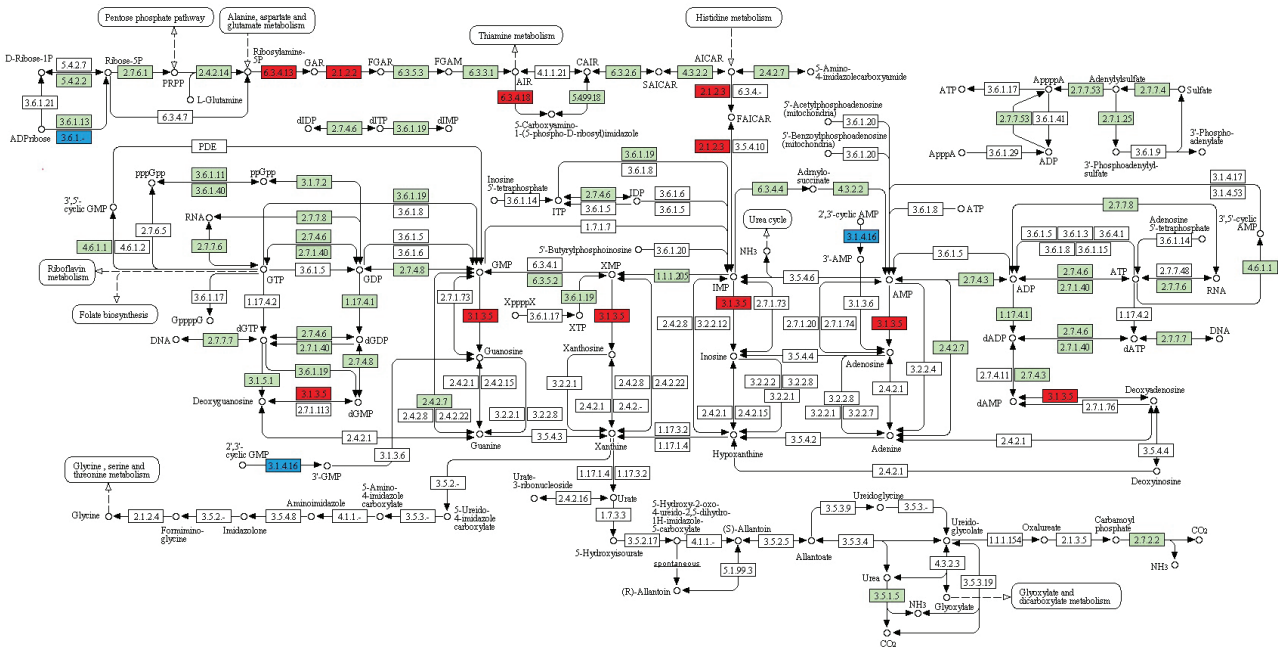

**Supplemental Figure 5** In purine metabolism two enzymes were assigned as the potential function of function-unknown proteins in sub-network 14 by mapping the same GO annotation of sub-network in *E. coli*. (Red nodes represent conserved function in *E. coli* and *Synechocystis* sp PCC 6803, Blue nodes represent novel nodes in *Synechocystis* sp PCC 6803, based on conserved function sub-network analysis.)

**Supplemental Table S1. PPIs as gold standard positive dataset (GSP).**

| P1      | P2      | P1      | P2      | P1      | P2      | P1      | P2      | P1      | P2      |
|---------|---------|---------|---------|---------|---------|---------|---------|---------|---------|
| slI0080 | slr1619 | slI1219 | slr0084 | slI1751 | slI1858 | slI0380 | slI0508 | slI0041 | slI1383 |
| slI0534 | slr0542 | slI1942 | slr1277 | slI1446 | slI1546 | slr1878 | ssr2009 | slI1614 | ssr2142 |
| slI0361 | slr0665 | slI0861 | slr0994 | slI1322 | slr0722 | slr0994 | slr1842 | slr0653 | slr0668 |
| slr0199 | slr0585 | slr0794 | slr1971 | slr1032 | slr7023 | slI0920 | slr1203 | slI0024 | slr1495 |
| slI1121 | slr0836 | slI1424 | slr0536 | slI1317 | slr1710 | slr0594 | slr1215 | slI1371 | slr1530 |
| slr0550 | slr1544 | slI0647 | slr0890 | slI1334 | slr0553 | slI0355 | slI1143 | slI0266 | slr2098 |
| slr0280 | slr1025 | slI0865 | slr0373 | slI0507 | slr0473 | slI0446 | slI1193 | slI0833 | slI1601 |
| slI0647 | slI1274 | slr0733 | slr1974 | slI1775 | slr1403 | slI0195 | ssr1258 | slr0565 | sml0003 |
| slr0467 | ssl0242 | slI0336 | slr0480 | slr1212 | slr2087 | slI1440 | slI2005 | slI1143 | slr0922 |
| slr1074 | slr1618 | slI1275 | slI1623 | slr0076 | slr1614 | slI0812 | slr0491 | slI0142 | slI1214 |
| slI0178 | ssr2439 | slI1621 | slr0280 | slI1354 | slr1926 | slI1165 | slr0060 | slI0702 | slI1265 |
| slr0506 | slr1644 | slI0732 | slr0337 | slr0820 | slr1568 | slI1739 | ssr3154 | slI0780 | slI0781 |
| slI0656 | slr0528 | slI0170 | slr2016 | slI0909 | slI0910 | slr1106 | slr1918 | slI1354 | slr1565 |
| slI1614 | slr0404 | slI0902 | slI1995 | slI0606 | slr1230 | slI1638 | slr1204 | slI1525 | slI1987 |
| slI1343 | slr1239 | slr0358 | slr1855 | slr1431 | ssr1256 | slr1591 | slr1854 | slr1706 | slr2038 |
| slI1586 | slI1679 | slr1044 | slr1215 | slI0779 | slI1814 | slr0738 | ssl2542 | slr1222 | slr1656 |
| slI1920 | ssr2142 | slr0514 | slr1767 | slI0783 | slr1542 | slI1568 | slr1417 | slI1079 | slr1592 |
| slI0754 | slr1471 | slI0002 | smr0010 | slI1868 | slr1533 | slI0621 | slr0798 | slI0418 | slI0676 |
| slI0702 | slr2018 | slI1757 | slr0506 | slI1625 | slr1847 | slI0519 | slI1614 | slI0237 | ssl2542 |
| slI0272 | slr0963 | slI0414 | slI1632 | slI0641 | slr1673 | slr1811 | ssr0854 | slI0524 | slI1584 |
| slr0615 | slr1865 | slI0263 | slr0981 | slr0294 | slr0392 | slr0553 | ssl0750 | slI0982 | slr0377 |
| slI1614 | slr1676 | slI0445 | slI1064 | slr1192 | slr7054 | slI0252 | slI0272 | slI0864 | slr0821 |
| slr0789 | slr1243 | slr1044 | slr1726 | slI0147 | ssr2016 | slr0006 | slr0204 | slr1742 | ssl2542 |
| slI0149 | slI0767 | slr0359 | slr1307 | slI0823 | slr0023 | slI0631 | slI2007 | slr1505 | slr2037 |
| slr0008 | slr0067 | slI1654 | slI1933 | slI0310 | slI1356 | slI0423 | slr2026 | slI1119 | slr1196 |
| slI0176 | ssl0312 | slI1737 | slI2003 | slI1653 | slr0597 | slr1215 | slr1728 | slr0008 | slr1278 |
| slI0414 | slI1563 | slI0488 | ssr1528 | slI1630 | slI1679 | slI1317 | slr0593 | slI1578 | slr0697 |
| slI1040 | smr0004 | slI0267 | slI1925 | slI0261 | slI0413 | slr0114 | ssr3451 | slr0936 | slr1262 |
| slI1418 | slr0454 | slr0467 | ssl1045 | slI0262 | slr0798 | slI0398 | slI0518 | slI1864 | slr1413 |
| slr0653 | slr1055 | slI0445 | slr1567 | slI0912 | ssr3532 | slr1604 | slr1774 | slI0740 | slr1913 |
| slI0021 | slr1774 | slr0675 | slr1751 | slr0543 | slr1194 | slI0238 | slr0798 | slr0479 | slr0804 |
| slI1679 | slr1699 | slI1866 | slI1933 | slr2018 | slr2038 | slI0865 | slI1961 | slI1841 | ssr1256 |
| slI0149 | slI0586 | slI0933 | slr1647 | slr0653 | slr0750 | slI1299 | slr1591 | slI0252 | slr1204 |
| slI0194 | slI1614 | slI1934 | slr0452 | slI1621 | slr1938 | slI0140 | slr0108 | slI0412 | slI1237 |
| slr0642 | slr1403 | slr1204 | slr1827 | slr0659 | ssr2049 | slI0296 | ssr3532 | slI1362 | slr0935 |
| slr0733 | ssr1258 | slI1482 | slI1864 | ssl3389 | ssr3451 | slI0623 | slI1667 | slI0778 | slr2034 |
| slI0558 | slr1731 | slI1586 | slr0980 | ssl0738 | ssl0739 | slI1530 | slr1511 | slr1928 | ssl2920 |
| slI0872 | slr0695 | slI1942 | ssl0294 | slr0603 | ssr2551 | slI0865 | ssl0242 | slr1773 | slr1795 |
| slI0242 | slr0343 | slI0616 | slI1360 | slr0876 | slr0889 | slI0242 | slI1724 | slr1699 | slr2089 |
| slI0606 | slI0915 | slI1427 | slr0737 | slI1426 | slr0871 | slr0467 | slr0729 | slI0427 | slI0779 |
| slI0141 | slr1773 | slI0577 | slI1166 | slr0214 | ssl3291 | slr0861 | ssl0750 | slr0091 | slr0880 |
| slI1323 | slI1324 | slI0322 | slI1864 | slI1513 | slr1660 | slI7055 | slr0990 | slI0281 | slr0263 |
| slI1913 | slr0280 | slI1802 | slI1817 | slr0143 | ssl0452 | slI0080 | slr2092 | slr0844 | slr1128 |
| slI0812 | slr1305 | slI0783 | slI1360 | slI1995 | slr0960 | slI0185 | slI0854 | slI1946 | ssr1698 |
| slr1152 | slr1505 | slr1053 | ssl3389 | slI0149 | ssl3432 | slI1675 | slr1285 | slI1098 | slI1240 |
| slI1733 | slI1967 | slI1715 | slr1113 | slI0865 | slI1659 | slI1965 | slr0653 | slI1858 | slr1644 |
| slr0514 | slr2111 | slI1241 | ssr2049 | slI0418 | slr1127 | slr1047 | slr1594 | slr0770 | ssr2754 |
| slI1946 | slr1572 | slr0111 | slr0156 | slI1098 | slr1759 | slI1595 | slr1840 | slI1733 | slI1950 |
| slr0606 | slr2102 | slI0861 | slr1506 | slr0364 | ssl0750 | slI1418 | slr0533 | slI1400 | ssl2733 |

|         |         |         |         |         |         |         |         |         |         |
|---------|---------|---------|---------|---------|---------|---------|---------|---------|---------|
| slI0645 | slr0589 | slI0837 | slr2144 | slI0905 | slI1031 | slI1424 | slr0653 | slI1558 | slI1763 |
| slr0633 | slr1095 | slr0751 | slr1045 | slr0408 | ssl0750 | slr0468 | slr0545 | slI0779 | slI1656 |
| slI0656 | slr1032 | slI0547 | slr1185 | slr0797 | slr1978 | slI1572 | slr1726 | slr1857 | ssl0483 |
| slr0077 | slr0214 | slI0180 | slr0076 | slI1231 | slr1573 | slr1239 | ssl0353 | slI1130 | slr0937 |
| slI1736 | slr0408 | slI0427 | slr1729 | slI0405 | slI0406 | slI0149 | slI1488 | slI0602 | slr1959 |
| slr1969 | ssr2843 | slI1096 | slr0366 | slI0016 | slr1204 | slr0399 | slr0487 | slr1787 | ssr3159 |
| slr1667 | slr1668 | slI1455 | slr0280 | slI1981 | ssl1577 | slI1428 | slI1482 | slr0473 | ssr1375 |
| slI0661 | slr2077 | slr0801 | slr1719 | slI1201 | slr1895 | slI1967 | slr1788 | slI0447 | slr1800 |
| slI0865 | ssl2999 | slI0099 | slI1072 | slI1934 | slr0534 | slr0557 | slr1966 | slI1174 | slI1371 |
| slr1648 | ssl0483 | slI0641 | ssr2595 | slr2001 | ssr1256 | slr0208 | slr1992 | slI0789 | ssr3571 |
| slI0488 | slr1084 | slr1098 | slr1565 | slI1193 | slr1274 | slI0641 | slI1129 | slr1821 | slr1957 |
| slI1614 | slr1052 | slI1614 | slr1518 | slI1084 | slI1902 | slr0594 | smr0010 | slI0865 | slr1974 |
| slI1772 | slr0529 | slI1732 | slr0798 | slI1356 | ssl0832 | slr0527 | slr1958 | slI1371 | slr1110 |
| slI0336 | slI1324 | slI0898 | slI1143 | slI0262 | slr0923 | slr0305 | slr0798 | slI1687 | slr0653 |
| slI1614 | slr0305 | slI0623 | slr0191 | slI0996 | slr1364 | slI2012 | slr0653 | slI1270 | ssl2615 |
| slr1278 | ssl0452 | slr0214 | slr0871 | slr0919 | slr1235 | slI1446 | slr1090 | slr1644 | slr1710 |
| slr1077 | ssr3154 | slI0102 | slr1471 | slI1564 | ssr1391 | slI0981 | slr0257 | slI1040 | smr0010 |
| slI0927 | slr0280 | slI0996 | slr1613 | slI1939 | slr1674 | slI1611 | slr0923 | slI0288 | ssl1255 |
| slI1513 | slr0640 | slI1427 | slr0370 | slI1441 | slr2077 | slr1330 | slr1743 | slI0776 | ssr1391 |
| slr0143 | slr1871 | slI1621 | slr1744 | slI0931 | slr1693 | slr0467 | slr1694 | slI0068 | slr1530 |
| slI0564 | slI1699 | slI0418 | ssl2996 | slI1466 | slI1730 | slr0482 | slr0921 | slr1028 | ssr1552 |
| slI0198 | slr1210 | slI1354 | slI1642 | slI0010 | slI1398 | slr0394 | slr1289 | slI1217 | slr1353 |
| slI1353 | slr1084 | slI1743 | slr0969 | slr0733 | slr1900 | slI0182 | slI0505 | slI1614 | slr0533 |
| slI1623 | slr0680 | slr1910 | ssl3692 | slI1800 | slI1802 | slI0848 | slI1135 | slI1228 | slI1542 |
| slI0611 | slI2012 | slr0525 | ssl0787 | slr0020 | slr2122 | slI1472 | slr0875 | slI0671 | slI0897 |
| slI0314 | slr0990 | slI0096 | slI1629 | slr0063 | ssr2009 | slI1614 | slI1733 | slI0404 | slI0864 |
| slI0669 | slI1454 | slI1434 | slr1992 | slI1526 | slr1762 | slr0551 | slr1778 | slI0446 | slr1198 |
| slI1454 | slI1512 | slr1330 | slr1498 | slI1578 | slr1300 | slI1318 | slr0733 | slI0445 | slr1429 |
| slI0350 | slr0250 | slr0213 | slr0536 | slr0386 | slr1319 | slI0441 | slr0955 | slI0269 | slr0602 |
| slI0103 | slI0529 | slr0733 | ssr2962 | slI0861 | slr2034 | slr1866 | smr0010 | slr1676 | ssl0787 |
| slr0108 | slr0942 | slI1003 | slI1908 | slr0537 | slr1028 | slr0431 | slr1032 | slI0436 | slI0647 |
| slr1044 | slr1618 | slr1567 | slr1809 | slI1418 | slr2077 | slI0310 | slI0776 | slI0066 | slr2087 |
| slr0789 | slr1971 | slI0180 | slI1500 | slI0068 | slr1614 | slI0947 | slI1773 | slr0774 | ssr3451 |
| slr0749 | slr1956 | slI1647 | slr0476 | slI0587 | ssr2787 | slr1037 | slr1047 | slr0288 | ssr1238 |
| slr0969 | ssl1577 | slI1463 | slr1045 | slI0156 | slr1699 | ssr2754 | ssr2755 | slI0558 | slI1527 |
| slI0864 | slI2005 | slI0178 | slr1301 | slI0776 | slr0171 | slI1104 | slr1420 | slI0776 | slr1926 |
| slI0661 | slr0861 | slI0053 | slI0184 | slr0073 | slr0354 | slI0198 | slr0362 | slr1697 | ssr2781 |
| slr0066 | slr0435 | slr1047 | slr1397 | slI0242 | slI0616 | slr1110 | slr1743 | slI0626 | slI1129 |
| slr0404 | slr1596 | slr0398 | slr1068 | slI2007 | slr1762 | slI0933 | slr0687 | slI0325 | slI1021 |
| slI0169 | slr1644 | slr0369 | slr0642 | slr0701 | slr0773 | slI0641 | slI1761 | slI1099 | slr0687 |
| slI0103 | slI1614 | slr0209 | slr1476 | slI0556 | slI0735 | slI0577 | slI0865 | slI0865 | ssr1258 |
| slI0547 | slI1634 | slI1353 | ssl1377 | slI1031 | slI1500 | slI0428 | slr0638 | slI0992 | slI1599 |
| slI0524 | slr0204 | slI1086 | slI1488 | slI0861 | slr1519 | slI0790 | slr0975 | slI0381 | slI0445 |
| slI0309 | ssr2843 | slI1455 | slr1047 | slI1434 | slr2038 | slI0236 | slI1902 | slr1575 | slr1776 |
| slr0793 | slr1638 | slI1323 | slr0679 | slI1267 | slr0335 | slI1783 | slr0666 | slr0249 | slr0373 |
| slI0788 | slr1591 | slI1076 | slI1418 | slr0658 | slr2016 | slI0169 | ssr2142 | slr0980 | slr1041 |
| slI0588 | slI1721 | slI0252 | slI0624 | slI1096 | slr0742 | slI1799 | slI1971 | slI1398 | slr0143 |
| slI0415 | slI0424 | slr0359 | slr0787 | slI1722 | slr0609 | slI0944 | slr1793 | slI0149 | slI1096 |
| slr0366 | ssl3177 | slr1147 | ssl2502 | slI1085 | slr0770 | slI2001 | slr1636 | slr0335 | slr0844 |
| slr0852 | slr1705 | slI1995 | slr0491 | slI1353 | slI1737 | slr0250 | slr0872 | slI0822 | slI1511 |
| slI0901 | slr0550 | slI0766 | slr0361 | slr0992 | slr2098 | slI0252 | slI1608 | slI0424 | slI0703 |



|         |         |         |         |         |         |         |         |         |         |
|---------|---------|---------|---------|---------|---------|---------|---------|---------|---------|
| sll1272 | sll1530 | sll0360 | sll0804 | slr0642 | slr1471 | sll0068 | slr1992 | slr0513 | slr1511 |
| slr0510 | ssr2615 | slr1367 | slr1603 | sll0669 | slr1064 | sll0669 | slr2092 | sll1868 | ssr3154 |
| sll0535 | sll7075 | sll1003 | slr1974 | slr0698 | ssl1923 | sll0804 | slr0211 | sll1281 | slr1019 |
| sll0322 | slr0232 | sll1562 | slr0467 | sll0931 | sll1566 | slr0157 | slr2018 | sll0178 | slr1505 |
| sll1902 | slr1636 | sll0148 | slr0152 | sll1037 | slr0467 | slr0528 | slr1809 | sll1424 | slr1959 |
| sll0819 | slr1866 | sll0763 | slr1028 | sll0280 | slr0653 | sll1079 | sll1775 | sll0191 | sll0222 |
| sll1304 | sll1688 | sll1858 | ssl2996 | slr0959 | slr1971 | slr0408 | slr1431 | slr0476 | slr2130 |
| sll0702 | slr0191 | slr0554 | ssl2733 | sll1614 | slr1603 | slr1732 | slr1788 | slr0695 | slr1590 |
| sll0931 | slr1699 | sll1699 | slr0550 | sll1802 | slr0366 | slr0794 | slr2087 | sll0021 | slr1568 |
| sll0175 | slr0880 | sll0920 | slr0579 | sll1814 | slr0765 | sll1173 | slr1847 | slr0905 | ssl1045 |
| sll0776 | sll1653 | sll0242 | sll0293 | sll1564 | sll1821 | sll0638 | sll1633 | sll0819 | slr1710 |
| slr0733 | ssl1255 | slr1139 | slr1238 | slr0163 | slr0941 | sll0584 | sll0780 | slr1343 | slr1604 |
| sll0178 | sll0532 | slr1788 | ssr1552 | sll0021 | slr1591 | sll1544 | sll1902 | slr0399 | slr1305 |
| sll0414 | slr0861 | sll1751 | ssr1562 | sll1241 | slr0201 | sll1372 | slr1978 | slr0066 | slr1626 |
| sll1614 | slr1595 | sll0296 | sll1761 | sll1500 | slr0423 | sll0041 | slr1800 | slr0115 | slr1338 |
| sll0821 | slr1593 | sll0785 | slr0545 | slr0978 | slr2099 | slr0008 | slr0675 | slr1081 | slr2018 |
| sll0737 | slr1391 | sll1229 | slr0773 | slr0423 | slr0746 | slr1727 | slr1729 | sll0996 | sll1679 |
| sll0149 | slr0679 | slr0162 | ssl0452 | slr1636 | slr2128 | sll0587 | sll1293 | sll0283 | slr1767 |
| slr0294 | slr1913 | sll0641 | sll0756 | sll0521 | slr1612 | sll1209 | slr0740 | sll1959 | slr1229 |
| slr0495 | slr1104 | sll0068 | ssr1256 | sll0095 | sll1542 | slr0793 | slr2144 | slr1603 | slr1978 |
| sll0445 | sll1502 | sll0827 | sll0862 | sll1629 | slr1204 | sll1317 | sll1920 | sll0142 | sll1446 |
| sll1875 | slr1977 | sll1737 | slr0369 | sll0754 | slr0384 | slr1444 | slr2025 | slr0774 | slr2087 |
| slr1199 | slr1474 | sll0242 | slr1773 | sll0398 | sll0810 | slr0417 | slr0491 | sll0199 | slr0602 |
| sll0041 | slr2037 | sll1621 | sll1625 | sll0022 | sll0023 | sll0039 | sll0985 | sll0055 | sll0555 |
| sll2012 | slr1702 | slr1215 | slr2036 | sll1218 | slr0788 | slr0076 | slr1325 | sll1632 | slr0208 |
| slr0688 | slr1347 | sll0508 | sll1314 | sll0819 | slr0765 | slr1235 | slr1423 | slr0232 | slr1644 |
| slr0023 | slr0963 | slr1164 | ssr2803 | sll1709 | slr1686 | sll0488 | slr1851 | sll0418 | sll1214 |
| sll5086 | ssr1399 | sll0743 | sll1969 | sll1841 | slr0550 | slr1791 | slr1842 | sll1908 | slr0263 |
| sll0175 | sll0539 | slr1612 | ssl0109 | slr1028 | ssl0750 | sll1294 | sll1956 | sll0698 | ssl3451 |
| slr0249 | slr1122 | sll0053 | slr0309 | sll0325 | sll0471 | sll0226 | slr1239 | sll8042 | slr0172 |
| sll0751 | slr0467 | sll0499 | ssr1375 | slr0351 | slr1519 | sll0252 | slr1626 | sll0295 | sll1366 |
| sll1647 | slr0885 | slr0399 | slr0984 | sll0398 | slr1437 | sll2005 | slr1974 | slr0534 | ssr3154 |
| sll0401 | sll1950 | sll0865 | slr0376 | sll0418 | sll1956 | sll0033 | sll1693 | slr1070 | slr2098 |
| sll0144 | sll0910 | sll0149 | sll0708 | sll0350 | slr1423 | sll0505 | sll0914 | slr0207 | slr1636 |
| sll0142 | slr1644 | sll1967 | slr1278 | slr0921 | slr1048 | sll0144 | slr1690 | sll1841 | ssr0536 |
| sll1689 | slr1055 | sll1920 | slr0473 | sll0242 | sll0828 | sll0428 | slr0442 | slr0451 | slr0889 |
| slr0171 | slr1044 | slr2131 | ssl2598 | sll1934 | slr1031 | sll1003 | slr2005 | sll0041 | sll0043 |
| sll0375 | slr2046 | sll1427 | slr1259 | sll1418 | slr0794 | sll0532 | sll1003 | sll1214 | slr1300 |
| sll0914 | slr2131 | slr1565 | ssr3188 | slr1593 | slr2047 | sll0381 | sll1184 | sll0861 | slr1658 |
| sll0754 | slr1647 | sll0920 | slr1636 | slr1198 | slr2130 | sll0910 | sll8034 | sll0638 | slr1077 |
| sll0216 | sll1886 | sll1575 | ssr1114 | slr0774 | ssl2598 | sll0804 | sll1858 | sll2012 | slr0889 |
| slr1651 | ssl1255 | sll0140 | slr0887 | sll0624 | slr1495 | slr1926 | slr2073 | slr0354 | slr0887 |
| sll1143 | sml0006 | sll1135 | slr0839 | slr1209 | slr1210 | sll0590 | slr0642 | sll0210 | sll0558 |
| sll0135 | slr1964 | sll0865 | ssr2831 | sll1614 | slr1291 | slr0364 | slr2084 | sll1025 | sll1273 |
| sll1317 | slr2131 | slr0208 | slr1844 | sll0026 | slr1471 | sll1967 | slr0969 | slr0994 | slr2011 |
| sll0688 | slr0073 | sll0703 | slr0579 | sll0350 | slr0992 | sll0418 | slr0243 | slr1492 | slr1493 |
| slr0091 | slr0585 | slr1090 | slr1636 | sll1621 | slr0697 | sll0923 | sll1653 | sll0865 | slr1902 |
| sll0923 | sll1472 | sll0821 | slr0839 | sll1814 | slr1471 | sll0672 | slr1950 | sll1770 | slr0211 |
| sll0933 | slr0704 | sll1272 | ssr1720 | slr0394 | slr0943 | sll1003 | slr0392 | sll1023 | ssr3159 |
| sll1180 | smr0001 | sll0284 | slr0733 | sll0985 | slr1613 | slr0602 | slr1331 | slr0213 | slr0514 |
| sll0071 | slr0900 | sll0985 | slr2131 | slr1353 | ssr3188 | slr0229 | slr1659 | sll0861 | slr1493 |

|         |         |         |         |         |         |         |         |         |         |
|---------|---------|---------|---------|---------|---------|---------|---------|---------|---------|
| slI0647 | slr1192 | slI1687 | slr0941 | slI1293 | slr0280 | slI0585 | slr1926 | slI1995 | slr2100 |
| slI0672 | slr0774 | slr0467 | ssr3122 | slI0616 | slI2005 | slI1908 | slr0955 | slI1912 | slr0467 |
| slr0341 | slr0722 | slr0192 | ssr0693 | slr0747 | slr1608 | slI1054 | slr0733 | slI1222 | slr0442 |
| slI1814 | slr0454 | slI0149 | slr1306 | slI0661 | slI1553 | slI0043 | slI1691 | slI0932 | slI1614 |
| slI1404 | slr1198 | slI0865 | ssr2194 | slI0606 | slI0641 | slr0798 | slr1518 | slI1165 | slI1934 |
| slr0665 | ssr1698 | slI0645 | slr0476 | slr0993 | slr1774 | slI1614 | slr1747 | slr1044 | ssr2142 |
| slI1500 | slI1608 | slI0544 | slI1366 | slI1491 | slr0585 | slI0459 | slr0889 | slI1925 | slr0774 |
| slI0639 | slr0484 | slI0499 | slr1926 | slr0871 | ssr0536 | slI0445 | slI0601 | slI0066 | slI0071 |
| slI0586 | slI1251 | slI0703 | slI2007 | slI0280 | slI1508 | slI1092 | ssl2138 | slI0499 | ssr2553 |
| slI1921 | slr1773 | slI1129 | slr1330 | slI0672 | slI1002 | slI1562 | slr0877 | slI1995 | slr0580 |
| slI0163 | slr1362 | slI0696 | slr0659 | slI0427 | slI1614 | slr1398 | slr1878 | slI0505 | slI1656 |
| slI0019 | slr0152 | slI1043 | slr1204 | slr1152 | slr1803 | slI2012 | slr1545 | slI0933 | slr0638 |
| slI0180 | slr1881 | slI0902 | slI1193 | slI0169 | slr1629 | slr0919 | slr1076 | slI0421 | slr1330 |
| slI0149 | slI1527 | slI1325 | ssl2999 | slI0823 | slr0739 | slr0431 | ssl3044 | slI0640 | slI0862 |
| slI0898 | slr0704 | slI0558 | slI1370 | slr1047 | slr1109 | slI1353 | slr1812 | slr0525 | slr0810 |
| slI1951 | ssl1377 | slI1231 | ssr2201 | slr1818 | ssr2803 | slI1253 | ssr2201 | slI1293 | ssl2807 |
| slI1383 | slI1760 | slI1669 | slr0953 | slI0851 | slr1655 | slr1423 | slr1811 | slI0418 | slr1917 |
| slI0182 | slr0589 | slr0615 | slr0942 | slI1132 | slI1738 | slI1247 | slr1066 | slI1143 | slr1100 |
| slI0057 | slr1738 | slI1599 | slr1573 | slI0865 | ssl1762 | slI1689 | slr1702 | slI1614 | ssr1386 |
| slI1178 | slI2006 | slr0536 | slr0955 | slI0521 | slr0798 | slr0423 | slr1617 | slI0864 | slr1879 |
| slr0451 | slr1847 | slI1987 | slr0147 | slI0270 | slr0169 | slI0149 | sml0011 | slI0223 | slr1403 |
| slr0630 | slr0942 | slr0280 | slr1614 | slI1746 | slI7065 | slr1417 | slr1708 | slI0208 | slr0171 |
| slI1029 | slr0729 | slI0596 | slr1848 | slI0779 | slr0602 | slI0815 | slr0467 | slr0473 | slr0806 |
| slI1343 | slr0994 | slr1222 | ssl2996 | slI0173 | slI1253 | slI0520 | slr0452 | slr0992 | slr1755 |
| slI0194 | slI1411 | slI0606 | slI1945 | slI0418 | slr0975 | slr1471 | ssl0331 | slI0208 | slI1632 |
| slr0157 | slr0309 | slI1291 | ssr2962 | slI1253 | slr0739 | slr0740 | slr1204 | slI1614 | slI1814 |
| slr1383 | ssl1377 | slI0861 | slr0406 | slI0319 | slr0665 | slI1174 | slr1668 | slI0269 | slr1044 |
| slI0584 | slr2131 | slI1981 | slr0348 | slI0041 | slI1512 | slr0008 | slr0467 | slI1305 | slr0152 |
| slr0378 | slr1592 | slI0027 | slI1614 | slI0832 | slI1608 | slI1500 | slr0280 | slI1003 | slr2092 |
| slr2084 | ssl0832 | slI0085 | slI0473 | slI0198 | ssl3573 | slI0723 | slI1005 | slr0978 | slr1596 |
| slr1122 | slr2098 | slI0672 | slr2087 | slr1098 | slr1353 | slI0985 | slr1842 | slr0662 | slr0974 |
| slI0865 | ssr1375 | slI1427 | slr1880 | slI0997 | slr0066 | slI0377 | slr0611 | slI0070 | slI0424 |
| slI0661 | slI1563 | slI0550 | slr1385 | slI1528 | ssr0692 | slI1001 | slI1981 | slI0502 | slI0982 |
| slI1250 | slr0442 | slI0318 | slr0496 | slI0228 | slr1674 | slI0445 | slI1835 | slI0676 | slr1331 |
| slI0493 | slI1294 | slr1225 | smr0001 | slr0589 | slr1776 | slI1653 | slI1673 | slI0602 | ssl3382 |
| slI0830 | slr1198 | slI0410 | slr0383 | slI0743 | slr1626 | slr1204 | slr2131 | slI0933 | slI1601 |
| slI0301 | slI1858 | slr0118 | slr0479 | slI1272 | slI1949 | slr0744 | slr0872 | slI1800 | slr0445 |
| slI1219 | slr1756 | slI1542 | slr1494 | slI1214 | slr1656 | slI1166 | slr0798 | slr0108 | slr1330 |
| slr0257 | slr1641 | slI0027 | slr1471 | slI0237 | slr1431 | slI1219 | slr1161 | slI7062 | slr0169 |
| slI0502 | ssr3154 | slI1263 | slI1772 | slI0854 | slr1348 | slI1912 | slr0363 | slI0980 | slr1686 |
| slr1300 | ssr2755 | slI0521 | slr0114 | slr1444 | slr1636 | slI0507 | slI0533 | slI0408 | slI0783 |
| slI1524 | slr0008 | slI1108 | slr0302 | slI0053 | slI0185 | slI0149 | slI1097 | slI0236 | ssl0294 |
| slI0909 | ssr1736 | slI1267 | slr1140 | slI1864 | slr0798 | slI0931 | slI1841 | slI1800 | slr0020 |
| slI0427 | slr0774 | slI0601 | slr1204 | slI1799 | slr1338 | slr1117 | ssl0294 | slI1739 | slr2034 |
| slI0872 | slr1800 | slI0048 | slr0341 | slI1995 | slr1211 | slI0053 | slr1431 | slr1767 | ssl2733 |
| slI0043 | slI1170 | slI0177 | slI1886 | slI0488 | slr0147 | slI0382 | slI0861 | slI0242 | slr1906 |
| slI0657 | slI1513 | slI1314 | slr0165 | slI0931 | slr0679 | slI0055 | slI1513 | slI1647 | slr0407 |
| slI1527 | ssl2996 | slI0811 | slI0861 | slr0359 | slr1908 | slI0606 | slr1604 | slI0243 | slI0375 |
| slI0370 | slI0413 | slI1383 | ssl2542 | slI1272 | ssl1762 | slI1418 | slr0602 | slI0819 | slr0774 |
| slr1393 | slr2111 | slI1787 | slr1431 | slI1721 | slI1841 | slI1434 | slr0341 | slI0149 | slI1822 |
| slI1675 | slr1416 | slI1317 | slr0594 | slr0585 | ssl0294 | slI1500 | slr1959 | slI0788 | slI1902 |

|         |         |         |         |         |         |         |         |         |         |
|---------|---------|---------|---------|---------|---------|---------|---------|---------|---------|
| sl11352 | slr1436 | sll1969 | slr0702 | sll0415 | slr1643 | slr1793 | ssl3382 | sll1841 | slr0147 |
| sl11905 | slr1362 | sll1969 | slr1196 | sll0096 | slr1403 | slr0343 | slr0765 | slr1207 | slr1210 |
| sll0488 | slr0228 | slr1901 | slr2092 | sll0103 | slr0298 | sll1498 | slr0955 | sll1800 | slr1122 |
| sll0456 | sll1247 | slr1603 | slr1971 | slr0317 | slr0818 | sll1950 | slr2084 | sll8020 | slr2072 |
| slr1272 | slr1851 | sll1800 | slr0990 | sll0222 | slr2105 | sll1291 | slr1385 | sll0982 | slr1301 |
| slr0798 | slr2033 | sll0178 | sll1825 | slr0299 | slr1616 | sll0865 | slr0503 | slr0868 | slr1423 |
| sll1920 | slr0503 | slr0876 | slr1964 | sll0782 | ssr2551 | slr1351 | slr1565 | slr1410 | slr1840 |
| sll1270 | slr1046 | sll0923 | sll1671 | slr0231 | slr0467 | slr1041 | ssr2843 | slr0818 | slr0992 |
| sll1323 | slr0713 | sll0590 | slr1215 | ssl0707 | ssr2787 | slr1243 | slr2077 | sll1578 | slr0324 |
| slr0599 | slr0602 | sll0282 | slr0354 | sll0754 | sll1601 | sll0382 | slr1222 | sll1584 | slr0909 |
| slr1986 | ssl0242 | slr0191 | slr1774 | sll1499 | slr1272 | sll1229 | slr1747 | sll1671 | slr0572 |
| sll0252 | slr0845 | slr0639 | slr1471 | sll1250 | slr0924 | sll0242 | ssl0353 | sll1586 | slr1204 |
| sll0656 | sll1825 | slr0854 | slr1117 | sll1035 | slr1204 | sll0584 | slr0794 | sll0687 | sll0688 |
| sll0933 | sll1070 | sll1343 | slr1686 | sll0702 | sll1283 | slr1471 | slr1595 | sll1687 | slr1019 |
| slr0306 | slr1342 | sll0735 | sll1864 | sll1270 | slr1518 | sll0513 | sll1679 | sll0743 | sll1315 |
| sll0242 | sll1679 | sll0149 | sll1967 | sll0754 | slr0733 | sll1737 | slr0844 | slr1288 | slr1311 |
| sll0485 | sll1620 | slr0798 | slr2098 | sll0558 | sll1766 | slr0798 | ssr2142 | slr1547 | ssr2142 |
| sll0534 | slr1423 | sll1614 | slr0589 | sll1027 | ssr2843 | slr0008 | slr0440 | sll0289 | slr0937 |
| sll0615 | slr0765 | slr0473 | ssr2422 | sll0732 | slr1857 | sll1426 | slr0383 | sll0149 | slr0989 |
| slr0280 | slr0992 | sll1383 | sll1508 | sll1291 | ssl0109 | sll1647 | ssl0294 | sll1611 | slr1471 |
| slr0602 | slr2034 | sll0488 | sll1775 | sll0375 | slr0431 | slr0467 | ssl2781 | sll1452 | slr1865 |
| sll0810 | slr1139 | slr1667 | ssr0854 | slr1778 | ssr2975 | slr0869 | slr1800 | slr1917 | slr2131 |
| sll1831 | slr1966 | sll1043 | slr0942 | sll0776 | sll1318 | sll0360 | sll1614 | sll0661 | sll1555 |
| sll0451 | slr1708 | sll0985 | sll1905 | sll0223 | slr1729 | sll1442 | slr0366 | sll0400 | slr1204 |
| slr1842 | ssl2542 | sll1541 | ssl3712 | sll0418 | ssr2755 | sll1484 | slr1655 | sll1053 | slr0341 |
| slr0797 | slr0798 | sll0544 | slr0280 | sll0191 | slr1753 | sll0656 | slr2118 | slr1248 | slr1385 |
| sll0336 | sll0728 | sll1546 | slr0923 | sll0149 | sll1812 | sll0616 | sll1408 | sll1696 | ssl0294 |
| sll0178 | slr1653 | sll0716 | slr0994 | sll2012 | slr0207 | sll0861 | slr1369 | slr0993 | slr1472 |
| sll0910 | slr0304 | sll0286 | sll1003 | sll0934 | slr0060 | sll1528 | ssl0832 | slr0023 | slr0063 |
| slr0602 | ssr2781 | sll1244 | slr0473 | slr1767 | smr0014 | sll0985 | slr1983 | sll1418 | slr1443 |
| sll1129 | slr0354 | sll0656 | slr0719 | slr0617 | ssl0353 | sll0022 | slr1136 | sll0854 | slr2100 |
| sll0779 | slr1595 | sll1775 | slr0245 | sll1736 | sll1858 | sll0301 | slr0369 | sll1360 | slr0104 |
| sll0915 | slr0442 | slr1508 | ssl0832 | sll1515 | slr1756 | slr0114 | smr0004 | slr1862 | slr2098 |
| sll1186 | sll1879 | sll1291 | ssr2848 | sll0554 | sll0741 | sll8049 | slr0065 | sll0980 | slr0257 |
| sll0156 | slr1119 | sll0728 | sll8009 | sll0325 | slr0775 | slr0366 | slr2048 | sll0727 | sll1737 |
| sll0208 | sll1218 | sll1714 | sll1715 | sll1165 | ssr1256 | slr0108 | slr1343 | sll0296 | sll1250 |
| sll0406 | slr0467 | sll0985 | slr0719 | sll0614 | sll0865 | sll1231 | ssr0692 | sll1324 | slr0602 |
| slr1204 | slr1610 | sll0763 | slr0093 | slr0697 | slr1198 | sll0502 | slr0361 | sll0508 | slr1843 |
| sll1579 | slr1390 | slr0937 | slr2052 | sll0455 | sll1763 | slr1204 | slr2007 | sll2005 | slr1629 |
| sll1884 | slr1896 | slr1046 | slr1403 | slr0226 | slr1866 | sll0377 | ssr1256 | sll0616 | slr0704 |
| sll0865 | sll1749 | slr0455 | ssl3142 | sll0322 | slr0171 | slr0080 | slr1230 | sll1908 | slr1143 |
| slr1216 | slr1232 | sll0913 | sll2005 | sll1222 | sll1763 | sll1925 | slr0143 | sll1489 | slr1047 |
| slr1638 | ssl3076 | sll0192 | sll1405 | sll0584 | slr0594 | slr0229 | slr1034 | sll0057 | sll1434 |
| slr0108 | ssr0511 | sll1736 | slr0794 | sll0295 | slr0585 | sll0413 | sll1003 | slr0423 | slr1852 |
| sll1737 | slr1950 | sll1031 | slr1023 | sll0068 | ssr1399 | slr1535 | slr2098 | slr0331 | slr1729 |
| sll0022 | slr0191 | sll1483 | ssl8008 | sll0149 | sll1743 | sll1864 | sll1920 | sll1527 | sll1956 |
| sll0057 | sll1463 | sll1874 | ssl2598 | sll0656 | sll0985 | slr1729 | ssl2615 | sll1577 | slr0818 |
| sll0851 | slr0341 | sll0283 | slr1148 | sll0055 | sll1483 | sll1528 | slr1732 | slr1062 | slr1423 |
| slr0399 | slr1110 | sll0892 | slr1143 | sll0446 | sll0449 | slr1167 | ssl3441 | sll2012 | slr0880 |
| slr0211 | slr0220 | sll0382 | sll0915 | sll0445 | slr1391 | sll1124 | slr1329 | sll1995 | slr1423 |
| slr1968 | ssr0692 | sll0413 | slr0280 | sll1902 | slr1177 | sll0596 | sll1077 | slr0459 | slr1143 |

|         |         |         |         |         |         |         |         |         |         |
|---------|---------|---------|---------|---------|---------|---------|---------|---------|---------|
| slI1222 | slI1477 | slI0688 | slr1423 | slI0370 | slI1864 | slI0154 | ssl3692 | slI0821 | slI1763 |
| slr1661 | slr9201 | slI0776 | slI1488 | slI0853 | slr0351 | slr0348 | slr1287 | slI2012 | slr0668 |
| slr2025 | slr2037 | slI0002 | slr1652 | slr0292 | slr1756 | slI1353 | ssl1784 | slI0238 | ssr1386 |
| slI1253 | ssl2084 | slr0630 | slr2088 | slI1119 | slr1966 | slI1679 | slI1951 | slI1841 | slr1096 |
| slI0638 | slI0827 | slI1868 | slr1732 | slI0142 | slr0331 | slI2005 | slr1431 | slI1427 | ssl2733 |
| slr0445 | slr1055 | slI0898 | slr1075 | slr0263 | slr1484 | slI1006 | smr0006 | slr0733 | ssl1707 |
| slI0147 | ssr1407 | slI0336 | slr0958 | slI0149 | slI1651 | slr0794 | smr0001 | slI0380 | slI1446 |
| slr1908 | slr2038 | slr0653 | slr1974 | slI1969 | slr0280 | slr0226 | slr0774 | slI0763 | slr1263 |
| slI0931 | slr2098 | slI0788 | slI1864 | slr0554 | ssl3291 | slI0071 | slI1441 | slI0162 | slr0093 |
| slI0286 | slI1366 | slr1307 | slr1857 | slr0263 | slr0442 | slI0243 | slI1262 | slr0733 | slr1653 |
| slr0774 | slr1726 | slI1237 | slr0592 | slr1699 | slr1888 | slI1742 | slr0050 | slI1214 | slr0420 |
| slr0287 | slr0857 | slI0577 | slr1376 | slr0798 | smr0009 | slI0149 | slr0383 | slI0149 | ssr1736 |
| slr0925 | slr1034 | slI0732 | slr1595 | slr1966 | slr1968 | slI0544 | slr0446 | slr1098 | slr1974 |
| slr0545 | slr2130 | slI1322 | slr0343 | slI1913 | slr0599 | slI0716 | slr0794 | slI0513 | slI1003 |
| slI0445 | slr1189 | slI0413 | slI1945 | slI1236 | slr1974 | slI2005 | slr0994 | slI1799 | slI1802 |
| slI1110 | slI1237 | slr1215 | slr1301 | slI1129 | slr1940 | slI0611 | ssr1399 | slI0676 | slI1831 |
| slr0439 | ssl0750 | slI0861 | slI1774 | slI0985 | slr1855 | slI0350 | slI0532 | slI0584 | slI0672 |
| slI0702 | slI1699 | slI1354 | slI1934 | slr1821 | slr1950 | slI0320 | slr1505 | slI0865 | slr2076 |
| slI0141 | slr0649 | slr0653 | sml0011 | slr2038 | ssr1473 | slr0288 | slr1800 | slI0615 | slI1614 |
| slI1454 | ssr3159 | slr0480 | slr0942 | slI1276 | slr1529 | slr0346 | slr1033 | slI0297 | slI0821 |
| slr0871 | slr1198 | slr0889 | slr1739 | slr0250 | slr1664 | slI1296 | ssl2999 | slI0413 | slr0844 |
| slI1774 | slr1198 | slI1965 | slr0213 | slI1466 | slr1194 | slI1006 | slr2033 | slr0733 | ssl2065 |
| slr1293 | slr1992 | slI0274 | slr2131 | slr0551 | slr1774 | slI1749 | slr1641 | slI1831 | ssl2996 |
| slI1513 | slr0798 | slr0963 | slr0980 | slI0536 | slI1797 | slI0208 | slr0243 | slI0446 | slI1555 |
| slI0283 | slr1655 | slr0369 | slr0797 | slr0399 | slr1920 | slI1526 | slr0484 | slr0335 | ssl3692 |
| slI1653 | slI2012 | slI0641 | slr1667 | slI0586 | slI1143 | slI1214 | slr0797 | slr1176 | slr1519 |
| slI0359 | slr1204 | slI0456 | slr0962 | slI0776 | slr1032 | slI1669 | slI2005 | slI0932 | slI1418 |
| slI0230 | ssl0750 | slI0269 | slI1814 | slr0765 | slr2087 | slI0865 | slr0992 | slI1001 | slI1863 |
| slI1135 | slr0483 | slI0779 | slr1655 | slr0360 | slr1732 | slI0499 | slr0121 | slI0053 | slr0280 |
| slI0238 | slI1614 | slI1868 | slr1398 | slr0147 | slr0676 | slI0149 | ssr2016 | slI1366 | ssr3154 |
| slI1614 | slr1215 | slI1393 | slI1502 | slI1143 | slr1629 | slI1317 | slr0454 | slI0185 | slI1614 |
| slr1431 | slr1799 | slI1542 | slr2032 | slI1527 | slr2120 | slI0053 | slI0175 | slI0375 | slr0366 |
| slI1812 | slr0722 | slI0418 | slr1906 | slI1086 | slr1708 | slI0804 | ssr2142 | slI0798 | smr0010 |
| slI1954 | slr0143 | slr0602 | slr1644 | slI0985 | slr1541 | slI1343 | slI1946 | slI1383 | slr0280 |
| slI1003 | slr0546 | slI1730 | slr1204 | slr1385 | slr1984 | slI1225 | ssl2420 | slI0923 | ssr0692 |
| slr0220 | ssr3159 | slI0865 | ssr2201 | slI1547 | slr0957 | slr0650 | slr0654 | slI0267 | slr1645 |
| slr0208 | slr0702 | slr1651 | ssl3389 | slI0142 | slI1752 | slI0871 | slr1300 | slI0641 | slr1391 |
| slI0413 | slr0810 | slI0020 | slr2098 | slI0361 | slI0641 | slI1536 | slr0821 | slI0596 | slI1757 |
| slI0149 | slI0888 | slI0192 | slI0413 | slI0821 | slr2053 | slI0169 | slr1127 | slI0985 | ssr1375 |
| slI0148 | ssr2755 | slI0361 | slr2013 | slI0108 | slI1920 | slI0865 | ssl0352 | slI1119 | slr1968 |
| slI0445 | slI0446 | slI0210 | slr1117 | slI1355 | slr0733 | slI0252 | slr0549 | slr0482 | ssl2542 |
| slI1237 | slI1865 | slI0216 | slr1880 | slr1835 | ssr2781 | slr0467 | slr1919 | slI1394 | slr1923 |
| slI0252 | slr2122 | slI0532 | slr0321 | slI0535 | ssr1513 | slr2031 | ssl3291 | slI0178 | ssl0294 |
| slI1294 | slr1636 | slI1293 | slr1028 | slI5042 | slr1902 | slI1751 | slr0143 | slI0499 | slI1101 |
| slI0780 | slr0787 | slI0149 | ssr1480 | slI0149 | ssl0090 | slr0211 | slr1222 | slr1495 | slr1848 |
| slI0238 | slr1205 | slr0565 | slr1471 | slr1761 | slr1978 | slr0919 | slr1917 | slr0586 | slr1110 |
| slI1879 | slr0734 | slI0540 | slI1913 | slr1272 | slr1732 | slI1797 | slr7024 | slr1212 | ssr2803 |
| slr1603 | slr2057 | slr0359 | ssl2996 | slI1527 | ssl0331 | slI0572 | slI1803 | slI0022 | slr1691 |
| slI1363 | slI2012 | slI0459 | slI1061 | slI1880 | slr1240 | slI1965 | ssl3719 | slI0588 | slr1266 |
| slI1586 | slI1967 | slI1775 | slr1420 | slI0359 | slI0822 | slI0184 | slr0889 | slI0584 | slI1920 |
| slI1454 | slr2084 | slI0350 | slr0950 | slr0844 | slr1204 | slI0776 | slI1435 | slI0547 | slr1787 |

|         |         |         |         |         |         |         |         |         |         |
|---------|---------|---------|---------|---------|---------|---------|---------|---------|---------|
| slI0022 | slI0641 | slI0310 | ssr2803 | slI0723 | slI1540 | slr0810 | slr2099 | slI0985 | slI1612 |
| slI0454 | slr1431 | slI1277 | slr0992 | slr1194 | slr1557 | slr0322 | ssl1377 | slI0314 | slr0103 |
| slI1231 | slr1571 | slI0350 | slr1799 | slr1275 | slr1969 | slr0510 | slr1139 | slI1003 | slI1252 |
| slr0280 | slr0845 | slr0479 | slr1349 | slI1455 | slI1477 | slr0602 | ssr2194 | slr1064 | slr1431 |
| slI1912 | slr0280 | slr0653 | slr1098 | slI0609 | slr2131 | slI1580 | slr1932 | slr0108 | slr0844 |
| slr0942 | slr1495 | slI1251 | ssr1399 | slr1136 | ssr2194 | slI0301 | slr1376 | slI2012 | slr0506 |
| slI0301 | slI1614 | slI1595 | slr1812 | slI0402 | slr1441 | slr0545 | slr2067 | slI1098 | slI1864 |
| slI0897 | slI1505 | slI0252 | slI1578 | slI0503 | slI1743 | slI0446 | slI0461 | slr1229 | slr2092 |
| slI0169 | slr1518 | slI0173 | slr1777 | slr0293 | slr0810 | slI1441 | slr0962 | slI0689 | ssr2142 |
| slI0833 | ssr3451 | slI1841 | slI1908 | slI1435 | ssr1375 | slI0314 | slI1835 | slI1446 | slr1152 |
| slr0935 | slr0994 | slI1613 | slr0697 | slr1303 | ssl2542 | slI1455 | slI1625 | slr0978 | slr1812 |
| slI0010 | slI1272 | slI1356 | ssl1255 | slI1193 | slr1932 | slr1760 | ssl3142 | slr1530 | slr2045 |
| slI0262 | slr0369 | slr1230 | slr1812 | slr0836 | ssr1480 | slI0010 | slr0364 | slI0488 | ssr2781 |
| slI0149 | slI0286 | slI0274 | slI1229 | slI1222 | slr0697 | slI0898 | slr0687 | slI0252 | slr0157 |
| slr0798 | slr1052 | slr0747 | ssl3177 | slI1920 | slr0226 | slI1354 | slr1851 | slI1058 | slr0038 |
| slI0057 | slI1180 | slI0242 | ssr2049 | slI1446 | slr1851 | slI1186 | slr1702 | slI0804 | slr0765 |
| slI1270 | ssl0353 | slI0739 | slI1393 | slI1864 | slr0974 | slr0179 | slr1591 | slr1107 | slr1369 |
| slr1440 | ssr2201 | slI0861 | slr2115 | slI0068 | slI1084 | slI0932 | slI1317 | slr0923 | slr1356 |
| slI1526 | slI2001 | slI0445 | slI1563 | slr1495 | ssr0536 | slr1591 | slr1974 | slI0554 | slI1799 |
| slr0542 | slr7037 | slr0664 | slr2098 | slI0865 | ssr2016 | slr0938 | slr1773 | slI1360 | slr1533 |
| slI0103 | slI0985 | slI0996 | slr0460 | slr1855 | ssl3044 | slr1227 | slr1307 | slI1799 | ssr0536 |
| slI1699 | slr0909 | slI0149 | slr1974 | slI0263 | slr0191 | slI8019 | slr1511 | slr0348 | slr1495 |
| slI0638 | slI0779 | slr1495 | ssl2807 | slr0681 | slr2087 | slI0590 | slr2135 | slr1761 | slr1918 |
| slI0732 | slr1229 | slI1613 | slr1938 | slI1167 | slI1411 | slI0192 | slr1761 | slI1800 | slr1315 |
| slr1139 | slr1699 | slI0735 | slr1604 | slI1143 | slI1835 | slI0540 | slr1198 | slI0398 | slr2141 |
| slr1030 | slr1777 | slr1248 | ssr1386 | slr1423 | ssl0331 | slI1315 | slr0272 | slI0242 | ssr3300 |
| slI1002 | slI1614 | slI1277 | slI1442 | slI1614 | sml0003 | slr0842 | ssr2615 | slr0386 | ssl2296 |
| slI0732 | slI1154 | slI0558 | slr1022 | slI1942 | slr1644 | slr0839 | slr1235 | slI0322 | slr1644 |
| slI0144 | slr1062 | slI1293 | slI1586 | slI0042 | slr1645 | slI0149 | ssr0757 | slI0136 | slI0252 |
| slI1193 | slr0604 | slr0152 | slr2102 | slI0065 | slI0184 | slr1760 | slr1812 | slr0305 | slr0765 |
| slI0818 | slr1140 | slr0604 | slr0740 | slI0199 | slr0454 | slr0280 | slr1420 | slI0252 | slr1865 |
| slI1737 | slr0640 | slr2121 | ssr1527 | slI1173 | slr0919 | slI1564 | slI1675 | slI0728 | slI1562 |
| slr1508 | slr1885 | slI1614 | smr0001 | slr0852 | slr1907 | slr0868 | slr1322 | slI0053 | slI1864 |
| slI0149 | slr0318 | slI1129 | slr1077 | slI0041 | slr1636 | slI0271 | slr0679 | slI1614 | slr0260 |
| slI0252 | slr1431 | slI0497 | slr0394 | slI1653 | slr1971 | slr0676 | slr2092 | slI0822 | slr1896 |
| slr1413 | slr1918 | slr2080 | ssr3532 | slI1087 | sml0003 | slI0507 | ssr0536 | slI1463 | slr1727 |
| slI1084 | slr1083 | slr1943 | slr1959 | slI0445 | slr0147 | slI0182 | slI1614 | slI0865 | slr1699 |
| slr0351 | slr0615 | slI1709 | slI1967 | slI1738 | ssl3379 | slr0810 | slr8023 | slr0454 | smr0010 |
| slr0280 | slr1223 | slI1658 | slr0525 | slI1679 | slI1772 | slr0186 | slr2121 | slr0794 | slr0795 |
| slI0504 | slr0302 | slr1129 | slr1557 | slI1802 | ssr1480 | slI0488 | slI0781 | slI0319 | slr1505 |
| slr1851 | slr1968 | slI0252 | ssr3154 | slI1751 | slr1301 | slI0933 | slr1471 | slr0104 | slr1629 |
| slI0189 | slr0171 | slI1262 | slr0649 | slr0519 | slr0861 | slr1471 | ssr1386 | slI1653 | slI1913 |
| slr0569 | ssr3154 | slI0178 | slI1394 | slI1954 | slI2010 | slr1538 | slr1557 | slI0985 | ssl0707 |
| slI1239 | slI1350 | slI0784 | slI1773 | slI1527 | ssr3300 | slr0607 | slr2130 | slI1226 | slr2025 |
| slI0536 | slr1531 | slI1689 | slI1965 | slI0354 | slr1866 | slI0621 | slI1317 | slI1871 | ssl2598 |
| slI1318 | slr0214 | slr0971 | slr1644 | slI0495 | slr1235 | slI1623 | slI1937 | slr0073 | slr0845 |
| slr0543 | slr0966 | slI0191 | slI1296 | slI0149 | ssl2507 | slr1044 | slr2033 | slI0584 | slI1614 |
| slI0252 | slr0386 | slr1090 | slr1900 | slI0507 | slr0121 | slr1533 | slr2048 | slI0017 | ssl2542 |
| slr0369 | sml0003 | slI2005 | slr0476 | slI1625 | ssr1698 | slI1774 | slr0924 | slI1699 | slr0551 |
| slI0149 | ssl0739 | slr1661 | slr2098 | slr0978 | slr1400 | slI0261 | ssl1762 | slI0043 | ssl3692 |
| slr1596 | ssr2142 | slI1001 | slr0569 | slr0697 | slr0980 | slI0270 | slr2092 | slr0280 | slr0549 |

|         |         |         |         |         |         |         |         |         |         |
|---------|---------|---------|---------|---------|---------|---------|---------|---------|---------|
| sl1371  | slr2026 | sl10547 | sl11426 | sl11858 | slr1052 | sl10985 | slr1329 | slr0523 | slr1023 |
| sl10169 | sl10819 | slr0667 | slr0668 | sl11084 | slr0630 | sl11715 | slr0467 | sl11477 | slr1198 |
| slr0848 | slr1048 | sl11577 | slr0280 | sl10985 | slr1768 | sl11769 | slr1048 | sl11614 | slr1655 |
| sl10172 | sl10173 | sl10861 | slr1071 | sl10804 | slr1046 | sl10661 | slr1992 | sl10252 | sl10997 |
| sl10616 | slr1697 | sl11222 | slr1025 | slr0445 | slr1610 | slr0445 | ssr2843 | slr1942 | ssl0352 |
| slr0795 | slr0797 | sl11231 | sl11658 | sl10914 | sl11427 | sl11787 | sl12006 | sl10020 | sl10822 |
| slr0451 | slr1441 | sl10534 | sl11562 | sl10071 | slr1761 | slr0243 | slr1125 | sl10616 | sl11799 |
| slr1455 | slr1842 | slr0066 | slr1614 | sl10911 | slr1594 | sl10274 | slr0594 | sl11689 | ssl1707 |
| slr0404 | slr1603 | sl11354 | ssl1255 | slr0942 | slr1420 | sl11231 | sl11671 | slr0208 | slr0444 |
| sl10944 | slr1934 | slr0662 | slr2019 | sl10915 | ssl3076 | sl10671 | slr1052 | sl10379 | sl11525 |
| slr0774 | slr0815 | sl11920 | sml0005 | sl10418 | sl11752 | sl11917 | slr1773 | slr0226 | slr0496 |
| slr1239 | slr1350 | sl11885 | slr0467 | slr0426 | slr1699 | sl10985 | slr1945 | slr0394 | slr1773 |
| sl10070 | sl10577 | slr1608 | slr1708 | sl10286 | sl11178 | sl10540 | sl11293 | sl11543 | ssl2999 |
| slr1364 | slr1992 | sl10177 | slr0955 | sl10861 | slr0315 | sl10752 | slr1644 | slr0280 | slr1081 |
| sl10779 | slr1978 | sl11092 | slr2098 | slr0765 | ssr2142 | sl11516 | slr2037 | sl11352 | slr1811 |
| sl11371 | slr0980 | slr0112 | slr0602 | sl11488 | sl11516 | slr0846 | slr1902 | sl11135 | sl11533 |
| sl10252 | slr1614 | sl10169 | sl10914 | sl11143 | slr0679 | sl11063 | slr1204 | slr1239 | slr1919 |
| sl10418 | sl10871 | sl10702 | slr1774 | slr1274 | slr1636 | sl11186 | slr1451 | slr0848 | slr1367 |
| sl10178 | slr1340 | sl10188 | slr0491 | slr0733 | ssr2439 | slr1556 | ssl3044 | slr0744 | slr1025 |
| sl11231 | slr0495 | sl10865 | sl11630 | sl10659 | slr0442 | sl10778 | sl10933 | sl11247 | slr1127 |
| sl11679 | slr1641 | sl10408 | slr2144 | sl11611 | smr0007 | slr0287 | slr2113 | sl15052 | slr0848 |
| slr0876 | slr1853 | slr0909 | ssr0692 | sl10631 | slr0994 | sl11656 | slr1645 | slr0467 | slr0675 |
| sl10198 | slr2124 | sl11527 | sl15006 | sl10744 | slr0810 | slr1044 | slr1052 | slr1020 | slr2098 |
| sl11556 | sl11643 | sl10068 | slr2125 | sl11625 | slr1992 | sl10043 | ssl2296 | slr0341 | slr0523 |
| slr0476 | slr2018 | sl11789 | slr0418 | sl10664 | slr1045 | sl10586 | sl10915 | ssl2064 | ssl2065 |
| slr1584 | slr1732 | sl11864 | slr1343 | sl10182 | slr1107 | sl10189 | slr0009 | sl11427 | slr0209 |
| slr0431 | ssl0750 | sl11634 | sl11817 | slr0149 | slr0495 | sl11703 | slr1343 | sl11614 | ssl2615 |
| sl10310 | slr1571 | sl10865 | ssl3712 | sl11817 | slr0053 | sl11987 | slr0818 | sl11469 | slr0467 |
| sl10641 | slr1266 | slr1956 | ssr2803 | sl10178 | slr0192 | slr1834 | ssl0563 | sl11526 | slr0467 |
| sl11057 | slr1896 | sl11879 | slr0192 | slr0692 | ssr2843 | slr2131 | ssl2615 | slr1222 | slr1609 |
| sl11499 | slr2098 | sl10933 | sl11166 | sl10865 | ssl2065 | sl10252 | slr0942 | sl11323 | slr0602 |
| slr0114 | ssr2142 | sl11371 | slr1812 | slr0070 | ssl1762 | slr0287 | slr1075 | slr0994 | slr1966 |
| sl10377 | sl11174 | slr1052 | slr1444 | slr0930 | slr1125 | sl10350 | slr0480 | sl10413 | slr1641 |
| sl10763 | slr1245 | sl10226 | slr0615 | sl10754 | sl11166 | slr2114 | ssl0109 | slr0635 | slr1417 |
| sl11803 | slr1055 | sl11987 | slr0006 | sl10007 | slr1699 | sl10520 | sl11938 | sl10754 | slr2036 |
| sl10007 | sl11902 | sl10252 | sl11830 | sl10194 | sl11489 | slr0031 | slr0479 | sl10398 | sl11968 |
| slr0707 | ssr0692 | sl10992 | slr1544 | slr0496 | slr1066 | slr1805 | slr1900 | sl10821 | sl10985 |
| sl11172 | slr1369 | sl10944 | slr1842 | sl11058 | slr0658 | sl11101 | slr0846 | sl10270 | slr1431 |
| sl10094 | slr1385 | slr0063 | slr0609 | slr0451 | ssl1784 | slr0348 | slr1235 | sl10270 | ssr2843 |
| sl11193 | slr1550 | slr0360 | slr1847 | sl11867 | slr1596 | sl11143 | sl11193 | sl11653 | slr1272 |
| sl10274 | slr0369 | sl12002 | ssl3076 | sl10888 | slr0467 | sl10286 | slr0733 | sl10944 | slr0415 |
| sl10177 | sl11218 | sl10912 | sl11805 | ssl2733 | ssr2962 | sl11098 | sl11293 | sl10070 | slr1614 |
| sl11272 | slr1258 | slr0798 | slr1726 | slr0121 | ssl0353 | sl11528 | slr1254 | sl11272 | slr0975 |
| sl11231 | sl11749 | sl11929 | slr1179 | sl11037 | ssl0452 | sl10595 | sl10861 | sl10519 | sl11270 |
| sl11454 | slr1353 | sl11874 | slr1702 | sl10067 | ssl0109 | sl10776 | slr0602 | sl10933 | sl11951 |
| slr0040 | slr1821 | slr1127 | slr1300 | sl11427 | slr1604 | sl11643 | slr1934 | sl10735 | slr1303 |
| sl10763 | slr0520 | sl11062 | ssl2148 | slr1863 | ssr3571 | sl10534 | sl10861 | sl11802 | sl11813 |
| sl10812 | sl11800 | sl10932 | slr2011 | slr1391 | slr1812 | sl11196 | slr1139 | sl10445 | sl11323 |
| sl11193 | slr1641 | sl10252 | slr0586 | sl11424 | sl11660 | sl11750 | slr2098 | sl10871 | sl11247 |
| sl10809 | slr1759 | sl11033 | ssl2667 | slr0077 | slr1834 | slr1378 | slr1854 | sl11120 | sl11693 |
| slr0638 | slr1603 | sl12012 | slr1082 | sl10380 | sl11174 | sl11908 | slr1591 | sl10865 | slr1440 |

|         |         |         |         |         |         |         |         |         |         |
|---------|---------|---------|---------|---------|---------|---------|---------|---------|---------|
| sl11305 | slr1073 | sl10080 | slr1612 | sl10861 | ssl2502 | sl10754 | slr0594 | slr1090 | ssl1577 |
| sl10270 | slr1974 | sl11003 | ssr2848 | sl10861 | slr1441 | slr0493 | ssr0482 | sl10252 | slr0435 |
| sl10418 | slr0108 | sl10418 | slr1066 | slr0665 | slr1198 | sl11378 | slr0280 | sl11457 | slr1194 |
| sl11124 | sl11801 | sl10208 | sl11643 | sl10554 | sl11514 | sl10283 | sl11601 | sl11222 | sl11594 |
| slr0854 | slr1536 | sl10108 | sl10169 | sl10709 | slr0744 | slr0156 | slr0604 | slr0734 | slr1204 |
| slr1431 | slr1573 | sl10023 | sl11841 | ssl2148 | ssr2615 | sl11231 | ssr1391 | sl11418 | slr1593 |
| sl10043 | slr1645 | sl10085 | sl11471 | sl10615 | sl10861 | sl10861 | slr1608 | slr0467 | slr0841 |
| slr0058 | slr0553 | sl10735 | slr2051 | slr0006 | slr0209 | sl10149 | sl11811 | slr0011 | slr1256 |
| slr0774 | smr0004 | sl11356 | ssr2201 | sl11344 | slr1565 | sl11343 | slr1966 | slr0019 | ssl2542 |
| sl10041 | sl10269 | slr0818 | slr1827 | sl11189 | sl11749 | sl10449 | sl10498 | slr0598 | slr1166 |
| slr0565 | slr0798 | slr0921 | slr1305 | sl10149 | ssr2787 | slr0954 | slr2098 | sl11408 | slr1902 |
| sl11343 | slr1799 | slr1046 | slr1471 | slr0322 | slr1777 | sl10754 | sl11003 | sl11858 | slr0171 |
| sl11920 | ssl3076 | sl11466 | slr0923 | slr0818 | slr1534 | slr0165 | slr0467 | sl10223 | slr0913 |
| slr0774 | slr1215 | sl11143 | ssr2049 | sl11231 | slr2005 | sl10023 | sl11454 | sl10781 | slr2098 |
| sl10837 | slr0467 | slr0144 | slr2017 | sl10418 | slr1609 | slr0358 | slr2073 | slr0697 | slr1204 |
| sl11317 | slr1376 | sl11912 | slr0066 | slr1992 | ssl0105 | slr0244 | slr1243 | slr0451 | slr0653 |
| sl10005 | sl11699 | sl10243 | ssr2848 | slr1053 | ssl1255 | sl11130 | ssl2245 | sl10053 | slr0435 |
| slr0144 | slr0147 | sl11393 | slr0579 | sl11071 | sl11353 | sl10169 | slr1235 | slr0496 | slr1776 |
| slr0445 | slr0733 | slr0018 | slr0392 | sl11424 | slr0320 | slr1203 | slr1325 | sl10355 | sl11685 |
| sl10861 | sl11864 | slr0451 | ssr1513 | sl10923 | sl12007 | sl11354 | sl11763 | sl11443 | ssr2551 |
| sl11219 | slr1031 | sl11578 | slr2031 | sl11938 | slr1025 | sl11799 | ssr3122 | slr0650 | slr1262 |
| slr1044 | slr1257 | sl11946 | ssr2848 | sl11613 | sl11647 | slr1977 | ssl2814 | sl10268 | sl10915 |
| sl10183 | sl10381 | sl12012 | slr0707 | sl10821 | slr1196 | slr1254 | slr1638 | sl10812 | slr1102 |
| sl10225 | slr1334 | sl10536 | slr1659 | sl10862 | sl11440 | sl11799 | slr0609 | sl10149 | slr1100 |
| sl10280 | sl10502 | slr1596 | slr1702 | slr1205 | slr1353 | sl10861 | sl10926 | sl11538 | slr0451 |
| slr0280 | slr0942 | slr1204 | slr2005 | sl11552 | slr1844 | slr1307 | slr1443 | sl10447 | slr0415 |
| sl11371 | ssl0832 | slr0120 | slr1812 | sl11350 | sl11751 | slr0408 | slr1862 | sl10507 | slr1052 |
| slr0209 | slr1431 | sl10865 | sl10898 | slr0536 | slr2098 | ssr0335 | ssr0336 | sl10042 | sl10572 |
| slr0143 | slr0399 | sl11477 | sl11763 | sl10088 | slr1444 | slr0366 | slr1677 | sl10822 | slr0758 |
| sl10554 | sl11541 | sl10508 | sl11396 | sl11614 | slr0343 | sl10931 | slr1885 | sl10911 | sl11544 |
| sl10301 | slr1950 | sl11193 | slr1887 | slr1529 | ssr2831 | slr1329 | slr1648 | sl10288 | sl10289 |
| sl10776 | slr1644 | sl10912 | slr0653 | sl10524 | slr0793 | sl10149 | ssl1377 | sl11688 | sl11830 |
| sl11323 | slr0294 | sl10756 | sl11699 | sl10272 | slr2102 | sl10447 | slr1048 | sl10252 | sl11994 |
| sl10586 | ssr2787 | sl10309 | ssl0750 | sl11614 | slr1557 | sl10057 | ssl0105 | sl10843 | sl11396 |
| slr0675 | ssr0854 | sl10931 | sl11969 | sl10263 | sl11509 | slr0907 | slr1699 | sl11201 | slr1991 |
| sl11231 | slr0845 | sl11394 | sl11981 | sl10149 | sl11805 | sl11483 | sl12005 | sl11011 | sl11222 |
| sl10821 | slr1143 | slr0758 | slr1299 | slr0204 | slr1777 | sl11452 | sl11660 | sl10865 | slr1437 |
| sl11967 | slr1566 | sl10804 | slr1726 | slr0653 | slr1330 | sl11262 | slr1799 | sl10509 | sl11398 |
| sl10169 | slr1218 | sl11669 | slr0335 | sl11699 | ssl3291 | sl10149 | slr0114 | sl10497 | slr0469 |
| slr0377 | slr1819 | sl10861 | slr1827 | sl11463 | ssr1256 | slr0288 | slr0744 | slr0607 | slr0697 |
| sl10354 | ssl1972 | sl10149 | sl11813 | sl10354 | slr1726 | sl11393 | slr1959 | slr1400 | slr1818 |
| sl11614 | slr0565 | slr0103 | slr1418 | slr1727 | slr2131 | slr0602 | slr1804 | slr0008 | slr0801 |
| slr0491 | slr0599 | sl11218 | slr0452 | sl11253 | ssr2615 | sl11061 | sl11424 | sl11683 | ssl1762 |
| sl11787 | slr0653 | sl10654 | sl10732 | slr1083 | slr1998 | slr1139 | slr1759 | sl10641 | sl10832 |
| slr1325 | slr1674 | sl10865 | slr0050 | sl10169 | slr0171 | sl10103 | ssl0294 | sl10785 | ssr1698 |
| slr1177 | ssl1464 | sl11214 | slr1350 | sl10026 | slr0798 | slr1415 | ssr1386 | sl10355 | sl11614 |
| slr0546 | slr1367 | sl10898 | slr0798 | sl10149 | ssl0352 | sl11676 | slr0351 | sl10821 | sl12007 |
| sl10182 | sl11060 | sl10525 | ssl1004 | sl10985 | sl11687 | sl10140 | slr1530 | sl11247 | slr0243 |
| sl10149 | ssr0692 | slr0157 | slr0280 | sl11483 | slr1664 | slr0993 | slr1275 | sl11327 | slr0844 |
| slr1028 | slr2084 | sl10735 | sl11076 | slr1429 | slr2084 | slr1667 | ssr0335 | slr1044 | slr1045 |
| sl10577 | slr0602 | sl10867 | sl11959 | slr0309 | slr0607 | sl10182 | slr0642 | sl11063 | slr0807 |

|         |         |         |         |         |         |         |         |         |         |
|---------|---------|---------|---------|---------|---------|---------|---------|---------|---------|
| slr0019 | slr0317 | sll0563 | sll1231 | slr1657 | slr1659 | sll0614 | slr1216 | sll0615 | sll1017 |
| sll0936 | slr1906 | sll1580 | slr0370 | sll1614 | slr2087 | slr0796 | slr1235 | sll0380 | sll1525 |
| sll1614 | ssr3451 | slr0280 | slr0550 | sll1669 | slr1048 | sll0639 | sll1427 | sll0443 | sll1187 |
| sll1704 | sll1921 | slr1267 | ssl3379 | slr1533 | slr1857 | sll0149 | sll0933 | slr0579 | slr1364 |
| sll0869 | ssl1377 | sll1620 | slr0733 | sll1488 | sll1775 | sll0194 | slr1471 | sll0354 | sll0606 |
| sll1371 | slr0199 | slr0852 | slr1906 | sll0672 | sll0898 | slr0838 | ssl2542 | sll1354 | slr2053 |
| sll0010 | slr0838 | sll0385 | slr0317 | sll0216 | sll1496 | sll2014 | slr0299 | slr0214 | slr0654 |
| sll2007 | slr1932 | slr0147 | slr1073 | sll1614 | slr0642 | sll0283 | sll0456 | sll1477 | sll1653 |
| sll1814 | slr0798 | slr2073 | ssr2554 | sll1452 | slr1756 | sll1180 | ssr3571 | sll0488 | sll1239 |
| sll1193 | slr0491 | sll1763 | slr0359 | slr0872 | slr1963 | sll1680 | slr0023 | slr0415 | ssl2084 |
| sll0192 | slr0454 | sll1439 | slr0467 | sll0783 | sll1037 | sll0208 | slr1398 | slr0687 | slr1110 |
| sll1708 | slr1896 | sll1441 | sll1463 | sll1138 | slr1204 | slr0484 | slr1083 | sll0034 | sll0310 |
| slr0376 | slr0456 | sll1799 | slr1531 | sll1931 | slr1198 | sll0535 | slr1855 | sll0021 | ssl2807 |
| sll0103 | slr1128 | sll0861 | slr0393 | slr0317 | slr1702 | sll1129 | slr0801 | sll0068 | slr0922 |
| sll0238 | slr0343 | sll1861 | ssl0331 | sll0058 | slr1385 | sll1442 | slr0772 | slr1992 | slr2130 |
| sll1578 | sll1969 | slr1436 | slr1462 | sll0783 | slr1420 | sll0505 | slr1906 | slr0556 | slr2098 |
| sll0995 | sll1072 | slr1881 | ssr3532 | sll0807 | sll1679 | sll0223 | slr0839 | sll0071 | sll1614 |
| sll1987 | slr1035 | sll1214 | slr1950 | slr1343 | slr1536 | sll1614 | slr2033 | sll1643 | slr2031 |
| sll1003 | ssl2502 | sll1555 | slr0868 | slr0357 | slr1626 | slr0810 | slr1744 | sll0149 | ssr1238 |
| sll0005 | slr1710 | sll0738 | slr1046 | slr0496 | slr1747 | sll1143 | ssr0692 | slr0050 | slr0543 |
| sll1579 | slr0299 | sll1761 | sll1945 | sll1110 | slr1266 | sll1516 | ssr2781 | slr0091 | slr0384 |
| sll0782 | slr1629 | sll0488 | ssr0854 | sll1830 | slr0697 | slr0765 | slr1052 | slr1343 | slr1916 |
| sll0252 | sll1143 | sll1733 | slr1729 | slr0519 | slr0633 | slr1254 | slr5038 | sll0192 | slr1107 |
| slr1280 | ssr2781 | sll0477 | sll1060 | sll0735 | slr1579 | sll0909 | sll1433 | slr1139 | slr1454 |
| sll0041 | sll1225 | sll0474 | sll0933 | sll0178 | ssr2201 | sll0068 | ssl0739 | sll1685 | slr0642 |
| slr0467 | slr1818 | sll0149 | slr0525 | sll0272 | slr1199 | sll1367 | slr1549 | sll1170 | sll1237 |
| sll1435 | slr0707 | sll0166 | slr1143 | sll0656 | ssr1238 | sll0053 | sll1366 | sll0788 | sll1472 |
| sll0787 | slr0015 | sll0455 | sll1813 | sll0252 | slr1287 | sll1231 | ssr2016 | sll0169 | sll1880 |
| sll1799 | slr0909 | sll1003 | ssr2049 | sll1443 | slr1023 | sll1414 | sll1651 | sll1715 | slr1777 |
| sll1060 | slr1710 | sll1643 | ssl0750 | sll1873 | slr2032 | sll0272 | sll1558 | slr0713 | slr0877 |
| sll1119 | slr0919 | sll1477 | ssl2542 | slr0506 | slr2043 | sll1029 | slr1686 | slr0378 | slr0550 |
| sll1526 | slr2080 | slr0304 | slr0790 | sll0354 | slr1609 | slr0399 | slr1645 | sll0624 | slr0073 |
| sll1370 | sll2015 | slr0280 | slr0990 | sll0861 | slr0434 | sll0008 | sll0716 | sll1399 | slr1590 |
| slr1918 | slr2077 | slr0818 | slr0877 | sll1085 | sll1774 | sll1632 | slr1852 | sll0149 | sll1435 |
| slr1874 | ssl2542 | slr0108 | slr0144 | sll1108 | sll1933 | sll0350 | sll1268 | sll1987 | slr1209 |
| sll0656 | sll0767 | sll1428 | slr2131 | sll0184 | ssl3364 | sll0519 | slr0798 | sll0096 | sll1557 |
| sll0252 | slr0317 | sll1006 | slr0723 | sll0779 | slr0565 | sll0053 | sll1249 | slr0599 | slr1710 |
| sll0362 | slr0341 | sll0408 | slr1181 | slr1307 | slr1993 | slr0423 | slr1265 | sll0886 | slr1398 |
| sll1446 | slr0977 | slr0408 | ssl2065 | sll0898 | slr0774 | sll1427 | sll1600 | sll1455 | slr0697 |
| slr1931 | slr2098 | sll1606 | slr1398 | sll1096 | slr2046 | slr0261 | ssr0692 | sll0933 | sll1614 |
| sll0149 | slr0653 | sll0788 | ssr2049 | slr0165 | slr0337 | slr0876 | slr1656 | slr0596 | ssr0657 |
| sll1875 | slr2025 | sll1250 | sll1355 | slr0848 | slr0969 | sll0185 | sll0735 | slr0384 | slr1834 |
| sll1699 | slr0607 | slr0214 | slr0293 | sll1353 | slr0740 | sll0865 | slr1464 | sll1611 | slr0798 |
| sll0310 | slr0733 | slr1169 | slr1567 | slr0359 | slr1211 | slr0697 | slr1699 | sll0606 | slr2046 |
| sll0148 | sll0350 | sll0020 | sll1954 | sll0794 | slr0579 | sll0041 | sll1582 | sll1360 | slr0876 |
| sll0286 | sll0380 | sll1679 | slr1572 | sll0754 | slr1363 | sll1086 | slr0993 | slr0546 | slr1329 |
| sll1601 | slr0535 | sll1873 | ssl0707 | sll0533 | slr1895 | sll1201 | slr1811 | sll0737 | slr1232 |
| sll0995 | slr1778 | sll0424 | slr0734 | slr1812 | ssr0757 | slr1291 | slr1350 | sll1514 | sll1841 |
| slr1462 | slr2087 | sll0269 | slr1052 | sll1270 | ssr2142 | sll0932 | slr1215 | slr0969 | slr1959 |
| slr0054 | slr1978 | sll1170 | slr0083 | sll0217 | sll0513 | slr0723 | slr1198 | sll0931 | sll1687 |
| sll1669 | slr1837 | slr0872 | slr1778 | slr0978 | slr1969 | sll2005 | ssl0294 | sll1930 | slr0287 |



|         |         |         |         |         |         |         |         |         |         |
|---------|---------|---------|---------|---------|---------|---------|---------|---------|---------|
| slr0317 | slr1763 | slr0451 | ssr1386 | sll0776 | slr0152 | slr0305 | slr0774 | sll0647 | sll1679 |
| sll0865 | slr1811 | sll0641 | sll1949 | sll1598 | ssl3441 | slr0204 | slr0596 | slr0280 | slr0354 |
| sll1135 | slr0356 | sll1886 | slr0114 | sll1614 | smr0008 | sll1871 | ssl1577 | sll1507 | slr1301 |
| sll5052 | slr0020 | slr1774 | ssl0109 | slr2077 | slr2087 | sll0188 | slr0992 | slr0467 | slr0787 |
| sll0149 | slr1032 | slr0454 | slr0503 | sll0775 | sll1433 | slr1150 | slr2128 | slr1369 | slr2077 |
| sll1967 | slr1164 | sll0861 | sll1169 | slr1103 | ssl0294 | sll1250 | slr2092 | slr0452 | ssl2542 |
| sll1198 | ssl2542 | sll0798 | ssl3432 | sll0554 | sll1103 | slr0808 | ssl3432 | sll1750 | slr0066 |
| sll1545 | slr0089 | slr0602 | smr0009 | sll0833 | slr1192 | sll1546 | sml0011 | slr1331 | slr1804 |
| sll1427 | slr0406 | slr1107 | ssl2598 | slr1693 | ssl0832 | sll0985 | slr1860 | sll1084 | slr0658 |
| slr0404 | slr1471 | slr0103 | slr0551 | sll0314 | sll0624 | sll1553 | sll1967 | sll0544 | sll0910 |
| sll0361 | slr1708 | sll2012 | slr1848 | sll1679 | slr0737 | sll0267 | ssl0787 | slr2136 | ssl0563 |
| sll0539 | slr1067 | slr0848 | slr1549 | sll0005 | sll1942 | sll1699 | slr1205 | sll0861 | slr0886 |
| sll0427 | sll1477 | slr0514 | slr1289 | sll0057 | sll1032 | sll0819 | slr1288 | sll1787 | sll2012 |
| sll0175 | sll0821 | sll0182 | sll0474 | slr1964 | ssr3572 | sll0006 | sll0513 | sll0631 | slr1614 |
| sll0325 | slr0611 | slr0008 | slr1550 | slr0546 | slr1842 | sll0914 | slr2105 | sll0043 | sll0192 |
| sll0173 | slr0408 | sll1390 | slr1376 | sll0051 | sll0739 | sll0005 | sll0992 | sll0320 | sll1763 |
| sll0005 | slr0867 | sll0149 | sll1054 | sll0021 | sll0022 | sll1730 | ssr3122 | sll0540 | slr2038 |
| sll0173 | sll1443 | sll1104 | slr1914 | sll0057 | sll1643 | sll0252 | sll1912 | sll1864 | ssl3291 |
| sll0756 | sll1104 | sll2005 | sll2007 | sll0812 | sll1802 | sll1553 | slr1720 | sll1799 | slr1978 |
| sll0497 | slr1417 | sll1428 | sll1614 | sll0053 | sll0309 | sll0513 | slr1934 | sll0657 | sll0790 |
| sll0226 | sll1180 | sll0616 | slr1521 | sll1398 | slr0733 | sll1620 | slr1902 | slr0473 | slr1529 |
| sll0446 | ssl3076 | sll1276 | slr1727 | sll2006 | slr2018 | slr1215 | slr1471 | slr0152 | slr1604 |
| sll1272 | slr0267 | sll0861 | slr1744 | slr0376 | ssr1552 | sll1671 | slr1096 | sll1507 | ssl2245 |
| sll0350 | slr1164 | sll1987 | slr0740 | sll0488 | sll1749 | sll1865 | slr1441 | slr0214 | ssl0331 |
| sll0666 | slr0599 | sll1394 | slr0884 | sll0057 | slr0697 | slr0467 | slr0666 | sll1393 | sll2005 |
| sll0149 | ssr1391 | sll1344 | ssr1114 | sll0585 | slr0579 | sll1864 | slr2102 | sll1433 | slr0942 |
| sll0216 | sll1995 | sll1861 | slr1235 | sll0671 | slr0181 | sll0252 | sll0564 | slr0355 | slr0940 |
| sll1359 | slr1673 | slr0646 | slr1847 | sll1367 | sll1949 | slr0304 | slr2104 | sll0242 | slr0579 |
| slr0011 | slr0143 | slr0787 | ssr3154 | sll0096 | sll1920 | sll0242 | slr1614 | slr1215 | slr2131 |
| sll0985 | slr0369 | sll0360 | slr1471 | slr0165 | slr1804 | sll0584 | sll1270 | sll0446 | slr0668 |
| sll1334 | ssr2803 | sll1672 | ssl0241 | slr0697 | slr1614 | sll0142 | sll1323 | sll1150 | slr0642 |
| sll1442 | ssl2807 | sll1787 | slr1441 | sll0819 | slr0839 | ssl0452 | ssl0453 | sll0194 | slr1225 |
| sll0149 | sll1398 | sll1703 | slr1865 | slr0519 | slr1067 | sll0584 | slr1950 | sll2005 | slr1557 |
| slr0545 | slr0913 | sll0068 | sll1658 | slr1645 | slr1983 | sll1423 | sll1812 | sll0488 | slr0442 |
| sll0504 | slr0941 | sll1293 | sll1296 | sll1219 | sll1371 | sll1611 | sll1906 |         |         |
| sll1949 | slr1277 | slr0653 | ssr1258 | sll1401 | slr1767 | sll0149 | sml0006 |         |         |

**Supplemental Table S2. PPIs as gold standard negative dataset (GSN).**

| P1      | P2      | P1      | P2      | P1      | P2      | P1      | P2      | P1      | P2      |
|---------|---------|---------|---------|---------|---------|---------|---------|---------|---------|
| sll0402 | sll1322 | sll1098 | slr0261 | sll1196 | smr0003 | slr0906 | slr1510 | sll1108 | ssl3093 |
| sll0728 | sll1322 | slr0261 | slr0434 | sll0745 | smr0003 | sll1043 | slr0906 | sll0362 | ssl3093 |
| sll0336 | sll1322 | sll1261 | slr0261 | sll1815 | smr0003 | slr0400 | slr0906 | slr0958 | ssl3093 |
| sll1299 | sll1322 | sll1099 | slr0261 | sll1059 | smr0003 | sll1415 | slr0906 | slr1720 | ssl3093 |
| sll1322 | ssl2084 | slr0261 | slr0752 | slr1123 | smr0003 | sll1909 | slr0906 | sll0179 | ssl3093 |
| sll1322 | sll2001 | slr0261 | slr0952 | sll1760 | smr0003 | sll0373 | slr0906 | sll0454 | ssl3093 |
| sll1322 | sll1430 | slr0261 | slr1511 | sll0469 | smr0003 | slr0906 | slr2035 | sll1553 | ssl3093 |
| sll0573 | sll1322 | sll1605 | slr0261 | slr1517 | smr0003 | slr0906 | slr2132 | slr0638 | ssl3093 |
| sll1322 | slr1898 | sll0990 | slr0261 | sll0869 | smr0003 | slr0906 | slr0922 | slr0220 | ssl3093 |
| sll0080 | sll1322 | sll1633 | slr0261 | slr1598 | smr0003 | slr0838 | slr0906 | slr0357 | ssl3093 |
| sll1322 | slr1022 | slr0018 | slr0261 | sll0868 | smr0003 | sll1823 | slr0906 | sll1362 | ssl3093 |
| sll1322 | sll1883 | sll0567 | slr0261 | slr0994 | smr0003 | sll1056 | slr0906 | slr1550 | ssl3093 |
| sll1322 | slr1133 | slr0261 | slr0884 | sll0379 | smr0003 | slr0520 | slr0906 | sll1074 | ssl3093 |
| sll1322 | slr0444 | sll1342 | slr0261 | sll1676 | smr0003 | sll0144 | slr0906 | slr0649 | ssl3093 |
| sll1322 | slr2130 | slr0261 | slr1349 | sll0927 | smr0003 | sll0467 | slr0906 | sll0495 | ssl3093 |
| sll1322 | sll1669 | sll0593 | slr0261 | sll0996 | smr0003 | slr0711 | slr0906 | sll1425 | ssl3093 |
| sll1322 | slr0585 | sll0220 | slr0261 | sll0844 | smr0003 | sll0754 | slr0906 | sll0502 | ssl3093 |
| sll1322 | slr2075 | sll0899 | slr0261 | sll1615 | smr0003 | sll0569 | slr0906 | slr1703 | ssl3093 |
| sll1322 | slr2076 | slr0261 | slr1756 | sll0202 | smr0003 | sll1277 | slr0906 | sll0078 | ssl3093 |
| sll0416 | sll1322 | sll1085 | slr0261 | slr0902 | smr0003 | sll1110 | slr0906 | slr0557 | ssl3093 |
| sll1322 | slr0156 | sll1931 | slr0261 | sll1144 | smr0003 | sll1865 | slr0906 | slr1884 | ssl3093 |
| sll1322 | slr1641 | sll0083 | slr0261 | slr0017 | smr0003 | slr0906 | slr1228 | slr1031 | ssl3093 |
| sll1322 | slr0542 | slr0261 | slr1755 | slr1424 | smr0003 | slr0808 | slr0906 | slr1793 | ssl3093 |
| sll0534 | sll1322 | sll0057 | slr0261 | slr1423 | smr0003 | slr0082 | slr0906 | slr0633 | ssl3093 |
| sll1322 | slr0165 | sll0017 | slr0261 | sll2010 | smr0003 | slr0742 | slr0906 | slr1278 | ssl3093 |
| sll0030 | sll1322 | sll1185 | slr0261 | slr0528 | smr0003 | sll0098 | slr0906 | slr0783 | ssl3093 |
| sll1322 | slr0847 | slr0261 | slr0839 | slr1351 | smr0003 | slr0906 | slr1646 | sll1198 | ssl3093 |
| sll1322 | slr0553 | sll1876 | slr0261 | sll0622 | smr0003 | slr0906 | slr1130 | sll0204 | ssl3093 |
| sll1322 | slr0812 | sll0900 | slr0261 | sll0631 | smr0003 | slr0080 | slr0906 | sll1750 | ssl3093 |
| sll1322 | slr1347 | slr0261 | slr0608 | slr0787 | smr0003 | slr0551 | slr0906 | sll0420 | ssl3093 |
| sll1322 | slr1348 | slr0261 | slr0652 | sll1852 | smr0003 | sll0145 | slr0906 | slr1256 | ssl3093 |
| sll1322 | slr1791 | slr0084 | slr0261 | slr1090 | smr0003 | sll0708 | slr0906 | sll1639 | ssl3093 |
| sll0594 | sll1322 | sll1893 | slr0261 | sll0902 | smr0003 | slr0679 | slr0906 | slr1899 | ssl3093 |
| sll1322 | slr0550 | slr0261 | slr0500 | slr0661 | smr0003 | slr0722 | slr0906 | sll0643 | ssl3093 |
| sll1058 | sll1322 | slr0261 | slr1560 | slr0526 | smr0003 | slr0072 | slr0906 | slr1844 | ssl3093 |
| sll1322 | slr1665 | sll1988 | slr0261 | sll1249 | smr0003 | sll1547 | slr0906 | sll0459 | ssl3093 |
| sll1322 | slr0536 | slr0261 | slr1289 | sll0892 | smr0003 | sll1234 | slr0906 | sll0865 | ssl3093 |
| sll1322 | slr1874 | sll1556 | slr0261 | sll0660 | smr0003 | sll0616 | slr0906 | slr0733 | ssl3093 |
| sll1322 | sll1776 | slr0261 | ssl3441 | slr1779 | smr0003 | slr0906 | slr2073 | sll1459 | ssl3093 |
| sll0848 | sll1322 | slr0261 | slr0744 | slr0394 | smr0003 | slr0906 | slr1639 | sll0905 | ssl3093 |
| sll0897 | sll1322 | slr0261 | slr0974 | slr2047 | smr0003 | sll1108 | slr0906 | sll0402 | sll0616 |
| sll1322 | sll1933 | slr0261 | slr1622 | slr0741 | smr0003 | sll0362 | slr0906 | sll0616 | sll0728 |
| sll1322 | slr0965 | sll1196 | slr0261 | slr1510 | smr0003 | slr0906 | slr0958 | sll0336 | sll0616 |
| sll1322 | slr1463 | sll0745 | slr0261 | sll1043 | smr0003 | slr0906 | slr1720 | sll0616 | sll1299 |
| sll1098 | sll1322 | sll1815 | slr0261 | slr0400 | smr0003 | sll0179 | slr0906 | sll0616 | ssl2084 |
| sll1322 | slr0434 | sll1059 | slr0261 | sll1415 | smr0003 | sll0454 | slr0906 | sll0616 | sll2001 |
| sll1261 | sll1322 | slr0261 | slr1123 | sll1909 | smr0003 | sll1553 | slr0906 | sll0616 | sll1430 |
| sll1099 | sll1322 | sll1760 | slr0261 | sll0373 | smr0003 | slr0638 | slr0906 | sll0573 | sll0616 |
| sll1322 | slr0752 | sll0469 | slr0261 | slr2035 | smr0003 | slr0220 | slr0906 | sll0616 | slr1898 |

|         |         |         |         |         |         |         |         |         |         |
|---------|---------|---------|---------|---------|---------|---------|---------|---------|---------|
| sl11322 | slr0952 | slr0261 | slr1517 | slr2132 | smr0003 | slr0357 | slr0906 | sl10080 | sl10616 |
| sl11322 | slr1511 | sl10869 | slr0261 | slr0922 | smr0003 | sl11362 | slr0906 | sl10616 | slr1022 |
| sl11322 | sl11605 | slr0261 | slr1598 | slr0838 | smr0003 | slr0906 | slr1550 | sl10616 | sl11883 |
| sl10990 | sl11322 | sl10868 | slr0261 | sl11823 | smr0003 | sl11074 | slr0906 | sl10616 | slr1133 |
| sl11322 | sl11633 | slr0261 | slr0994 | sl11056 | smr0003 | slr0649 | slr0906 | sl10616 | slr0444 |
| sl11322 | slr0018 | sl10379 | slr0261 | slr0520 | smr0003 | sl10495 | slr0906 | sl10616 | slr2130 |
| sl10567 | sl11322 | sl11676 | slr0261 | sl10144 | smr0003 | sl11425 | slr0906 | sl10616 | sl11669 |
| sl11322 | slr0884 | sl10927 | slr0261 | sl10467 | smr0003 | sl10502 | slr0906 | sl10616 | slr0585 |
| sl11322 | sl11342 | sl10996 | slr0261 | slr0711 | smr0003 | slr0906 | slr1703 | sl10616 | slr2075 |
| sl11322 | slr1349 | sl10844 | slr0261 | sl10754 | smr0003 | sl10078 | slr0906 | sl10616 | slr2076 |
| sl10593 | sl11322 | sl11615 | slr0261 | sl10569 | smr0003 | slr0557 | slr0906 | sl10416 | sl10616 |
| sl10220 | sl11322 | sl10202 | slr0261 | sl11277 | smr0003 | slr0906 | slr1884 | sl10616 | slr0156 |
| sl10899 | sl11322 | slr0261 | slr0902 | sl11110 | smr0003 | slr0906 | slr1031 | sl10616 | slr1641 |
| sl11322 | slr1756 | sl11144 | slr0261 | sl11865 | smr0003 | slr0906 | slr1793 | sl10616 | slr0542 |
| sl11085 | sl11322 | slr0017 | slr0261 | slr1228 | smr0003 | slr0633 | slr0906 | sl10534 | sl10616 |
| sl11322 | sl11931 | slr0261 | slr1424 | slr0808 | smr0003 | slr0906 | slr1278 | sl10616 | slr0165 |
| sl10083 | sl11322 | slr0261 | slr1423 | slr0082 | smr0003 | slr0783 | slr0906 | sl10030 | sl10616 |
| sl11322 | slr1755 | sl12010 | slr0261 | slr0742 | smr0003 | sl11198 | slr0906 | sl10616 | slr0847 |
| sl10057 | sl11322 | slr0261 | slr0528 | sl10098 | smr0003 | sl10204 | slr0906 | sl10616 | slr0553 |
| sl10017 | sl11322 | slr0261 | slr1351 | slr1646 | smr0003 | sl11750 | slr0906 | sl10616 | slr0812 |
| sl11185 | sl11322 | sl10622 | slr0261 | slr1130 | smr0003 | sl10420 | slr0906 | sl10616 | slr1347 |
| sl11322 | slr0839 | sl10631 | slr0261 | slr0080 | smr0003 | slr0906 | slr1256 | sl10616 | slr1348 |
| sl11322 | sl11876 | slr0261 | slr0787 | slr0551 | smr0003 | sl11639 | slr0906 | sl10616 | slr1791 |
| sl10900 | sl11322 | sl11852 | slr0261 | sl10145 | smr0003 | slr0906 | slr1899 | sl10594 | sl10616 |
| sl11322 | slr0608 | slr0261 | slr1090 | sl10708 | smr0003 | sl10643 | slr0906 | sl10616 | slr0550 |
| sl11322 | slr0652 | sl10902 | slr0261 | slr0679 | smr0003 | slr0906 | slr1844 | sl10616 | sl11058 |
| sl11322 | slr0084 | slr0261 | slr0661 | slr0722 | smr0003 | sl10459 | slr0906 | sl10616 | slr1665 |
| sl11322 | sl11893 | slr0261 | slr0526 | slr0072 | smr0003 | sl10865 | slr0906 | sl10616 | slr0536 |
| sl11322 | slr0500 | sl11249 | slr0261 | sl11547 | smr0003 | slr0733 | slr0906 | sl10616 | slr1874 |
| sl11322 | slr1560 | sl10892 | slr0261 | sl11234 | smr0003 | sl11459 | slr0906 | sl10616 | sl11776 |
| sl11322 | sl11988 | sl10660 | slr0261 | sl10616 | smr0003 | sl10905 | slr0906 | sl10616 | sl10848 |
| sl11322 | slr1289 | slr0261 | slr1779 | slr2073 | smr0003 | sl10402 | sl10851 | sl10616 | sl10897 |
| sl11322 | sl11556 | slr0261 | slr0394 | slr1639 | smr0003 | sl10728 | sl10851 | sl10616 | sl11933 |
| sl11322 | ssl3441 | slr0261 | slr2047 | sl11108 | smr0003 | sl10336 | sl10851 | sl10616 | slr0965 |
| sl11322 | slr0744 | slr0261 | slr0741 | sl10362 | smr0003 | sl10851 | sl11299 | sl10616 | slr1463 |
| sl11322 | slr0974 | slr0261 | slr1510 | slr0958 | smr0003 | sl10851 | ssl2084 | sl10616 | sl11098 |
| sl11322 | slr1622 | sl11043 | slr0261 | slr1720 | smr0003 | sl10851 | sl12001 | sl10616 | slr0434 |
| sl11196 | sl11322 | slr0261 | slr0400 | sl10179 | smr0003 | sl10851 | sl11430 | sl10616 | sl11261 |
| sl10745 | sl11322 | sl11415 | slr0261 | sl10454 | smr0003 | sl10573 | sl10851 | sl10616 | sl11099 |
| sl11322 | sl11815 | sl11909 | slr0261 | sl11553 | smr0003 | sl10851 | slr1898 | sl10616 | slr0752 |
| sl11059 | sl11322 | sl10373 | slr0261 | slr0638 | smr0003 | sl10080 | sl10851 | sl10616 | slr0952 |
| sl11322 | slr1123 | slr0261 | slr2035 | slr0220 | smr0003 | sl10851 | slr1022 | sl10616 | slr1511 |
| sl11322 | sl11760 | slr0261 | slr2132 | slr0357 | smr0003 | sl10851 | sl11883 | sl10616 | sl11605 |
| sl10469 | sl11322 | slr0261 | slr0922 | sl11362 | smr0003 | sl10851 | slr1133 | sl10616 | sl10990 |
| sl11322 | slr1517 | slr0261 | slr0838 | slr1550 | smr0003 | sl10851 | slr0444 | sl10616 | sl11633 |
| sl10869 | sl11322 | sl11823 | slr0261 | sl11074 | smr0003 | sl10851 | slr2130 | sl10616 | slr0018 |
| sl11322 | slr1598 | sl11056 | slr0261 | slr0649 | smr0003 | sl10851 | sl11669 | sl10567 | sl10616 |
| sl10868 | sl11322 | slr0261 | slr0520 | sl10495 | smr0003 | sl10851 | slr0585 | sl10616 | slr0884 |
| sl11322 | slr0994 | sl10144 | slr0261 | sl11425 | smr0003 | sl10851 | slr2075 | sl10616 | sl11342 |
| sl10379 | sl11322 | sl10467 | slr0261 | sl10502 | smr0003 | sl10851 | slr2076 | sl10616 | slr1349 |
| sl11322 | sl11676 | slr0261 | slr0711 | slr1703 | smr0003 | sl10416 | sl10851 | sl10593 | sl10616 |

|         |         |         |         |         |         |         |         |         |         |
|---------|---------|---------|---------|---------|---------|---------|---------|---------|---------|
| sll0927 | sll1322 | sll0754 | slr0261 | sll0078 | smr0003 | sll0851 | slr0156 | sll0220 | sll0616 |
| sll0996 | sll1322 | sll0569 | slr0261 | slr0557 | smr0003 | sll0851 | slr1641 | sll0616 | sll0899 |
| sll0844 | sll1322 | sll1277 | slr0261 | slr1884 | smr0003 | sll0851 | slr0542 | sll0616 | slr1756 |
| sll1322 | sll1615 | sll1110 | slr0261 | slr1031 | smr0003 | sll0534 | sll0851 | sll0616 | sll1085 |
| sll0202 | sll1322 | sll1865 | slr0261 | slr1793 | smr0003 | sll0851 | slr0165 | sll0616 | sll1931 |
| sll1322 | slr0902 | slr0261 | slr1228 | slr0633 | smr0003 | sll0030 | sll0851 | sll0083 | sll0616 |
| sll1144 | sll1322 | slr0261 | slr0808 | slr1278 | smr0003 | sll0851 | slr0847 | sll0616 | slr1755 |
| sll1322 | slr0017 | slr0082 | slr0261 | slr0783 | smr0003 | sll0851 | slr0553 | sll0057 | sll0616 |
| sll1322 | slr1424 | slr0261 | slr0742 | sll1198 | smr0003 | sll0851 | slr0812 | sll0017 | sll0616 |
| sll1322 | slr1423 | sll0098 | slr0261 | sll0204 | smr0003 | sll0851 | slr1347 | sll0616 | sll1185 |
| sll1322 | sll2010 | slr0261 | slr1646 | sll1750 | smr0003 | sll0851 | slr1348 | sll0616 | slr0839 |
| sll1322 | slr0528 | slr0261 | slr1130 | sll0420 | smr0003 | sll0851 | slr1791 | sll0616 | sll1876 |
| sll1322 | slr1351 | slr0080 | slr0261 | slr1256 | smr0003 | sll0594 | sll0851 | sll0616 | sll0900 |
| sll0622 | sll1322 | slr0261 | slr0551 | sll1639 | smr0003 | sll0851 | slr0550 | sll0616 | slr0608 |
| sll0631 | sll1322 | sll0145 | slr0261 | slr1899 | smr0003 | sll0851 | sll1058 | sll0616 | slr0652 |
| sll1322 | slr0787 | sll0708 | slr0261 | sll0643 | smr0003 | sll0851 | slr1665 | sll0616 | slr0084 |
| sll1322 | sll1852 | slr0261 | slr0679 | slr1844 | smr0003 | sll0851 | slr0536 | sll0616 | sll1893 |
| sll1322 | slr1090 | slr0261 | slr0722 | sll0459 | smr0003 | sll0851 | slr1874 | sll0616 | slr0500 |
| sll0902 | sll1322 | slr0072 | slr0261 | sll0865 | smr0003 | sll0851 | sll1776 | sll0616 | slr1560 |
| sll1322 | slr0661 | sll1547 | slr0261 | slr0733 | smr0003 | sll0848 | sll0851 | sll0616 | sll1988 |
| sll1322 | slr0526 | sll1234 | slr0261 | sll1459 | smr0003 | sll0851 | sll0897 | sll0616 | slr1289 |
| sll1249 | sll1322 | sll0616 | slr0261 | sll0905 | smr0003 | sll0851 | sll1933 | sll0616 | sll1556 |
| sll0892 | sll1322 | slr0261 | slr2073 | sll0402 | sml0004 | sll0851 | slr0965 | sll0616 | ssl3441 |
| sll0660 | sll1322 | slr0261 | slr1639 | sll0728 | sml0004 | sll0851 | slr1463 | sll0616 | slr0744 |
| sll1322 | slr1779 | sll1108 | slr0261 | sll0336 | sml0004 | sll0851 | sll1098 | sll0616 | slr0974 |
| sll1322 | slr0394 | sll0362 | slr0261 | sll1299 | sml0004 | sll0851 | slr0434 | sll0616 | slr1622 |
| sll1322 | slr2047 | slr0261 | slr0958 | sml0004 | ssl2084 | sll0851 | sll1261 | sll0616 | sll1196 |
| sll1322 | slr0741 | slr0261 | slr1720 | sll2001 | sml0004 | sll0851 | sll1099 | sll0616 | sll0745 |
| sll1322 | slr1510 | sll0179 | slr0261 | sll1430 | sml0004 | sll0851 | slr0752 | sll0616 | sll1815 |
| sll1043 | sll1322 | sll0454 | slr0261 | sll0573 | sml0004 | sll0851 | slr0952 | sll0616 | sll1059 |
| sll1322 | slr0400 | sll1553 | slr0261 | slr1898 | sml0004 | sll0851 | slr1511 | sll0616 | slr1123 |
| sll1322 | sll1415 | slr0261 | slr0638 | sll0080 | sml0004 | sll0851 | sll1605 | sll0616 | sll1760 |
| sll1322 | sll1909 | slr0220 | slr0261 | slr1022 | sml0004 | sll0851 | sll0990 | sll0469 | sll0616 |
| sll0373 | sll1322 | slr0261 | slr0357 | sll1883 | sml0004 | sll0851 | sll1633 | sll0616 | slr1517 |
| sll1322 | slr2035 | sll1362 | slr0261 | slr1133 | sml0004 | sll0851 | slr0018 | sll0616 | sll0869 |
| sll1322 | slr2132 | slr0261 | slr1550 | slr0444 | sml0004 | sll0567 | sll0851 | sll0616 | slr1598 |
| sll1322 | slr0922 | sll1074 | slr0261 | slr2130 | sml0004 | sll0851 | slr0884 | sll0616 | sll0868 |
| sll1322 | slr0838 | slr0261 | slr0649 | sll1669 | sml0004 | sll0851 | sll1342 | sll0616 | slr0994 |
| sll1322 | sll1823 | sll0495 | slr0261 | slr0585 | sml0004 | sll0851 | slr1349 | sll0379 | sll0616 |
| sll1056 | sll1322 | sll1425 | slr0261 | slr2075 | sml0004 | sll0593 | sll0851 | sll0616 | sll1676 |
| sll1322 | slr0520 | sll0502 | slr0261 | slr2076 | sml0004 | sll0220 | sll0851 | sll0616 | sll0927 |
| sll0144 | sll1322 | slr0261 | slr1703 | sll0416 | sml0004 | sll0851 | sll0899 | sll0616 | sll0996 |
| sll0467 | sll1322 | sll0078 | slr0261 | slr0156 | sml0004 | sll0851 | slr1756 | sll0616 | sll0844 |
| sll1322 | slr0711 | slr0261 | slr0557 | slr1641 | sml0004 | sll0851 | sll1085 | sll0616 | sll1615 |
| sll0754 | sll1322 | slr0261 | slr1884 | slr0542 | sml0004 | sll0851 | sll1931 | sll0202 | sll0616 |
| sll0569 | sll1322 | slr0261 | slr1031 | sll0534 | sml0004 | sll0083 | sll0851 | sll0616 | slr0902 |
| sll1277 | sll1322 | slr0261 | slr1793 | slr0165 | sml0004 | sll0851 | slr1755 | sll0616 | sll1144 |
| sll1110 | sll1322 | slr0261 | slr0633 | sll0030 | sml0004 | sll0057 | sll0851 | sll0616 | slr0017 |
| sll1322 | sll1865 | slr0261 | slr1278 | slr0847 | sml0004 | sll0017 | sll0851 | sll0616 | slr1424 |
| sll1322 | slr1228 | slr0261 | slr0783 | slr0553 | sml0004 | sll0851 | sll1185 | sll0616 | slr1423 |
| sll1322 | slr0808 | sll1198 | slr0261 | slr0812 | sml0004 | sll0851 | slr0839 | sll0616 | sll2010 |

|         |         |         |         |         |         |         |         |         |         |
|---------|---------|---------|---------|---------|---------|---------|---------|---------|---------|
| sll1322 | slr0082 | sll0204 | slr0261 | slr1347 | sml0004 | sll0851 | sll1876 | sll0616 | slr0528 |
| sll1322 | slr0742 | sll1750 | slr0261 | slr1348 | sml0004 | sll0851 | sll0900 | sll0616 | slr1351 |
| sll0098 | sll1322 | sll0420 | slr0261 | slr1791 | sml0004 | sll0851 | slr0608 | sll0616 | sll0622 |
| sll1322 | slr1646 | slr0261 | slr1256 | sll0594 | sml0004 | sll0851 | slr0652 | sll0616 | sll0631 |
| sll1322 | slr1130 | sll1639 | slr0261 | slr0550 | sml0004 | sll0851 | slr0084 | sll0616 | slr0787 |
| sll1322 | slr0080 | slr0261 | slr1899 | sll1058 | sml0004 | sll0851 | sll1893 | sll0616 | sll1852 |
| sll1322 | slr0551 | sll0643 | slr0261 | slr1665 | sml0004 | sll0851 | slr0500 | sll0616 | slr1090 |
| sll0145 | sll1322 | slr0261 | slr1844 | slr0536 | sml0004 | sll0851 | slr1560 | sll0616 | sll0902 |
| sll0708 | sll1322 | sll0459 | slr0261 | slr1874 | sml0004 | sll0851 | sll1988 | sll0616 | slr0661 |
| sll1322 | slr0679 | sll0865 | slr0261 | sll1776 | sml0004 | sll0851 | slr1289 | sll0616 | slr0526 |
| sll1322 | slr0072 | slr0261 | slr0733 | sll0848 | sml0004 | sll0851 | sll1556 | sll0616 | sll1249 |
| sll1322 | sll1547 | sll1459 | slr0261 | sll0897 | sml0004 | sll0851 | ssl3441 | sll0616 | sll0892 |
| sll1234 | sll1322 | sll0905 | slr0261 | sll1933 | sml0004 | sll0851 | slr0744 | sll0616 | sll0660 |
| sll0616 | sll1322 | sll0402 | sll0520 | slr0965 | sml0004 | sll0851 | slr0974 | sll0616 | slr1779 |
| sll1322 | slr2073 | sll0520 | sll0728 | slr1463 | sml0004 | sll0851 | slr1622 | sll0616 | slr0394 |
| sll1322 | slr1639 | sll0336 | sll0520 | sll1098 | sml0004 | sll0851 | sll1196 | sll0616 | slr2047 |
| sll1108 | sll1322 | sll0520 | sll1299 | slr0434 | sml0004 | sll0745 | sll0851 | sll0616 | slr0741 |
| sll0362 | sll1322 | sll0520 | ssl2084 | sll1261 | sml0004 | sll0851 | sll1815 | sll0616 | slr1510 |
| sll1322 | slr0958 | sll0520 | sll2001 | sll1099 | sml0004 | sll0851 | sll1059 | sll0616 | sll1043 |
| sll1322 | slr1720 | sll0520 | sll1430 | slr0752 | sml0004 | sll0851 | slr1123 | sll0616 | slr0400 |
| sll0179 | sll1322 | sll0520 | sll0573 | slr0952 | sml0004 | sll0851 | sll1760 | sll0616 | sll1415 |
| sll0454 | sll1322 | sll0520 | slr1898 | slr1511 | sml0004 | sll0469 | sll0851 | sll0616 | sll1909 |
| sll1322 | sll1553 | sll0080 | sll0520 | sll1605 | sml0004 | sll0851 | slr1517 | sll0373 | sll0616 |
| sll1322 | slr0638 | sll0520 | slr1022 | sll0990 | sml0004 | sll0851 | sll0869 | sll0616 | slr2035 |
| sll1322 | slr0220 | sll0520 | sll1883 | sll1633 | sml0004 | sll0851 | slr1598 | sll0616 | slr2132 |
| sll1322 | slr0357 | sll0520 | slr1133 | slr0018 | sml0004 | sll0851 | sll0868 | sll0616 | slr0922 |
| sll1322 | sll1362 | sll0520 | slr0444 | sll0567 | sml0004 | sll0851 | slr0994 | sll0616 | slr0838 |
| sll1322 | slr1550 | sll0520 | slr2130 | slr0884 | sml0004 | sll0379 | sll0851 | sll0616 | sll1823 |
| sll1074 | sll1322 | sll0520 | sll1669 | sll1342 | sml0004 | sll0851 | sll1676 | sll0616 | sll1056 |
| sll1322 | slr0649 | sll0520 | slr0585 | slr1349 | sml0004 | sll0851 | sll0927 | sll0616 | slr0520 |
| sll0495 | sll1322 | sll0520 | slr2075 | sll0593 | sml0004 | sll0851 | sll0996 | sll0144 | sll0616 |
| sll1322 | sll1425 | sll0520 | slr2076 | sll0220 | sml0004 | sll0844 | sll0851 | sll0467 | sll0616 |
| sll0502 | sll1322 | sll0416 | sll0520 | sll0899 | sml0004 | sll0851 | sll1615 | sll0616 | slr0711 |
| sll1322 | slr1703 | sll0520 | slr0156 | slr1756 | sml0004 | sll0202 | sll0851 | sll0616 | sll0754 |
| sll0078 | sll1322 | sll0520 | slr1641 | sll1085 | sml0004 | sll0851 | slr0902 | sll0569 | sll0616 |
| sll1322 | slr0557 | sll0520 | slr0542 | sll1931 | sml0004 | sll0851 | sll1144 | sll0616 | sll1277 |
| sll1322 | slr1884 | sll0520 | sll0534 | sll0083 | sml0004 | sll0851 | slr0017 | sll0616 | sll1110 |
| sll1322 | slr1031 | sll0520 | slr0165 | slr1755 | sml0004 | sll0851 | slr1424 | sll0616 | sll1865 |
| sll1322 | slr1793 | sll0030 | sll0520 | sll0057 | sml0004 | sll0851 | slr1423 | sll0616 | slr1228 |
| sll1322 | slr0633 | sll0520 | slr0847 | sll0017 | sml0004 | sll0851 | sll2010 | sll0616 | slr0808 |
| sll1322 | slr1278 | sll0520 | slr0553 | sll1185 | sml0004 | sll0851 | slr0528 | sll0616 | slr0082 |
| sll1322 | slr0783 | sll0520 | slr0812 | slr0839 | sml0004 | sll0851 | slr1351 | sll0616 | slr0742 |
| sll1198 | sll1322 | sll0520 | slr1347 | sll1876 | sml0004 | sll0622 | sll0851 | sll0098 | sll0616 |
| sll0204 | sll1322 | sll0520 | slr1348 | sll0900 | sml0004 | sll0631 | sll0851 | sll0616 | slr1646 |
| sll1322 | sll1750 | sll0520 | slr1791 | slr0608 | sml0004 | sll0851 | slr0787 | sll0616 | slr1130 |
| sll0420 | sll1322 | sll0520 | sll0594 | slr0652 | sml0004 | sll0851 | sll1852 | sll0616 | slr0080 |
| sll1322 | slr1256 | sll0520 | slr0550 | slr0084 | sml0004 | sll0851 | slr1090 | sll0616 | slr0551 |
| sll1322 | sll1639 | sll0520 | sll1058 | sll1893 | sml0004 | sll0851 | sll0902 | sll0145 | sll0616 |
| sll1322 | slr1899 | sll0520 | slr1665 | slr0500 | sml0004 | sll0851 | slr0661 | sll0616 | sll0708 |
| sll0643 | sll1322 | sll0520 | slr0536 | slr1560 | sml0004 | sll0851 | slr0526 | sll0616 | slr0679 |
| sll1322 | slr1844 | sll0520 | slr1874 | sll1988 | sml0004 | sll0851 | sll1249 | sll0616 | slr0722 |

|         |         |         |         |         |         |         |         |         |         |
|---------|---------|---------|---------|---------|---------|---------|---------|---------|---------|
| slI0459 | slI1322 | slI0520 | slI1776 | slr1289 | sml0004 | slI0851 | slI0892 | slI0616 | slr0072 |
| slI0865 | slI1322 | slI0520 | slI0848 | slI1556 | sml0004 | slI0660 | slI0851 | slI0616 | slI1547 |
| slI1322 | slr0733 | slI0520 | slI0897 | sml0004 | ssl3441 | slI0851 | slr1779 | slI0616 | slI1234 |
| slI1322 | slI1459 | slI0520 | slI1933 | slr0744 | sml0004 | slI0851 | slr0394 | slI0616 | slI0616 |
| slI0905 | slI1322 | slI0520 | slr0965 | slr0974 | sml0004 | slI0851 | slr2047 | slI0616 | slr2073 |
| slI0402 | slI1326 | slI0520 | slr1463 | slr1622 | sml0004 | slI0851 | slr0741 | slI0616 | slr1639 |
| slI0728 | slI1326 | slI0520 | slI1098 | slI1196 | sml0004 | slI0851 | slr1510 | slI0616 | slI1108 |
| slI0336 | slI1326 | slI0520 | slr0434 | slI0745 | sml0004 | slI0851 | slI1043 | slI0362 | slI0616 |
| slI1299 | slI1326 | slI0520 | slI1261 | slI1815 | sml0004 | slI0851 | slr0400 | slI0616 | slr0958 |
| slI1326 | ssl2084 | slI0520 | slI1099 | slI1059 | sml0004 | slI0851 | slI1415 | slI0616 | slr1720 |
| slI1326 | slI2001 | slI0520 | slr0752 | slr1123 | sml0004 | slI0851 | slI1909 | slI0179 | slI0616 |
| slI1326 | slI1430 | slI0520 | slr0952 | slI1760 | sml0004 | slI0373 | slI0851 | slI0454 | slI0616 |
| slI0573 | slI1326 | slI0520 | slr1511 | slI0469 | sml0004 | slI0851 | slr2035 | slI0616 | slI1553 |
| slI1326 | slr1898 | slI0520 | slI1605 | slr1517 | sml0004 | slI0851 | slr2132 | slI0616 | slr0638 |
| slI0080 | slI1326 | slI0520 | slI0990 | slI0869 | sml0004 | slI0851 | slr0922 | slI0616 | slr0220 |
| slI1326 | slr1022 | slI0520 | slI1633 | slr1598 | sml0004 | slI0851 | slr0838 | slI0616 | slr0357 |
| slI1326 | slI1883 | slI0520 | slr0018 | slI0868 | sml0004 | slI0851 | slI1823 | slI0616 | slI1362 |
| slI1326 | slr1133 | slI0520 | slI0567 | slr0994 | sml0004 | slI0851 | slI1056 | slI0616 | slr1550 |
| slI1326 | slr0444 | slI0520 | slr0884 | slI0379 | sml0004 | slI0851 | slr0520 | slI0616 | slI1074 |
| slI1326 | slr2130 | slI0520 | slI1342 | slI1676 | sml0004 | slI0144 | slI0851 | slI0616 | slr0649 |
| slI1326 | slI1669 | slI0520 | slr1349 | slI0927 | sml0004 | slI0467 | slI0851 | slI0495 | slI0616 |
| slI1326 | slr0585 | slI0520 | slI0593 | slI0996 | sml0004 | slI0851 | slr0711 | slI0616 | slI1425 |
| slI1326 | slr2075 | slI0220 | slI0520 | slI0844 | sml0004 | slI0754 | slI0851 | slI0502 | slI0616 |
| slI1326 | slr2076 | slI0520 | slI0899 | slI1615 | sml0004 | slI0569 | slI0851 | slI0616 | slr1703 |
| slI0416 | slI1326 | slI0520 | slr1756 | slI0202 | sml0004 | slI0851 | slI1277 | slI0078 | slI0616 |
| slI1326 | slr0156 | slI0520 | slI1085 | slr0902 | sml0004 | slI0851 | slI1110 | slI0616 | slr0557 |
| slI1326 | slr1641 | slI0520 | slI1931 | slI1144 | sml0004 | slI0851 | slI1865 | slI0616 | slr1884 |
| slI1326 | slr0542 | slI0083 | slI0520 | slr0017 | sml0004 | slI0851 | slr1228 | slI0616 | slr1031 |
| slI0534 | slI1326 | slI0520 | slr1755 | slr1424 | sml0004 | slI0851 | slr0808 | slI0616 | slr1793 |
| slI1326 | slr0165 | slI0057 | slI0520 | slr1423 | sml0004 | slI0851 | slr0082 | slI0616 | slr0633 |
| slI0030 | slI1326 | slI0017 | slI0520 | slI2010 | sml0004 | slI0851 | slr0742 | slI0616 | slr1278 |
| slI1326 | slr0847 | slI0520 | slI1185 | slr0528 | sml0004 | slI0098 | slI0851 | slI0616 | slr0783 |
| slI1326 | slr0553 | slI0520 | slr0839 | slr1351 | sml0004 | slI0851 | slr1646 | slI0616 | slI1198 |
| slI1326 | slr0812 | slI0520 | slI1876 | slI0622 | sml0004 | slI0851 | slr1130 | slI0204 | slI0616 |
| slI1326 | slr1347 | slI0520 | slI0900 | slI0631 | sml0004 | slI0851 | slr0080 | slI0616 | slI1750 |
| slI1326 | slr1348 | slI0520 | slr0608 | slr0787 | sml0004 | slI0851 | slr0551 | slI0420 | slI0616 |
| slI1326 | slr1791 | slI0520 | slr0652 | slI1852 | sml0004 | slI0145 | slI0851 | slI0616 | slr1256 |
| slI0594 | slI1326 | slI0520 | slr0084 | slr1090 | sml0004 | slI0708 | slI0851 | slI0616 | slI1639 |
| slI1326 | slr0550 | slI0520 | slI1893 | slI0902 | sml0004 | slI0851 | slr0679 | slI0616 | slr1899 |
| slI1058 | slI1326 | slI0520 | slr0500 | slr0661 | sml0004 | slI0851 | slr0722 | slI0616 | slI0643 |
| slI1326 | slr1665 | slI0520 | slr1560 | slr0526 | sml0004 | slI0851 | slr0072 | slI0616 | slr1844 |
| slI1326 | slr0536 | slI0520 | slI1988 | slI1249 | sml0004 | slI0851 | slI1547 | slI0459 | slI0616 |
| slI1326 | slr1874 | slI0520 | slr1289 | slI0892 | sml0004 | slI0851 | slI1234 | slI0616 | slI0865 |
| slI1326 | slI1776 | slI0520 | slI1556 | slI0660 | sml0004 | slI0616 | slI0851 | slI0616 | slr0733 |
| slI0848 | slI1326 | slI0520 | ssl3441 | slr1779 | sml0004 | slI0851 | slr2073 | slI0616 | slI1459 |
| slI0897 | slI1326 | slI0520 | slr0744 | slr0394 | sml0004 | slI0851 | slr1639 | slI0616 | slI0905 |
| slI1326 | slI1933 | slI0520 | slr0974 | slr2047 | sml0004 | slI0851 | slI1108 | slI0402 | slr1034 |
| slI1326 | slr0965 | slI0520 | slr1622 | slr0741 | sml0004 | slI0362 | slI0851 | slI0728 | slr1034 |
| slI1326 | slr1463 | slI0520 | slI1196 | slr1510 | sml0004 | slI0851 | slr0958 | slI0336 | slr1034 |
| slI1098 | slI1326 | slI0520 | slI0745 | slI1043 | sml0004 | slI0851 | slr1720 | slI1299 | slr1034 |
| slI1326 | slr0434 | slI0520 | slI1815 | slr0400 | sml0004 | slI0179 | slI0851 | slr1034 | ssl2084 |

|         |         |         |         |         |         |         |         |         |         |
|---------|---------|---------|---------|---------|---------|---------|---------|---------|---------|
| sll1261 | sll1326 | sll0520 | sll1059 | sll1415 | sml0004 | sll0454 | sll0851 | sll2001 | slr1034 |
| sll1099 | sll1326 | sll0520 | slr1123 | sll1909 | sml0004 | sll0851 | sll1553 | sll1430 | slr1034 |
| sll1326 | slr0752 | sll0520 | sll1760 | sll0373 | sml0004 | sll0851 | slr0638 | sll0573 | slr1034 |
| sll1326 | slr0952 | sll0469 | sll0520 | slr2035 | sml0004 | sll0851 | slr0220 | slr1034 | slr1898 |
| sll1326 | slr1511 | sll0520 | slr1517 | slr2132 | sml0004 | sll0851 | slr0357 | sll0080 | slr1034 |
| sll1326 | sll1605 | sll0520 | sll0869 | slr0922 | sml0004 | sll0851 | sll1362 | slr1022 | slr1034 |
| sll0990 | sll1326 | sll0520 | slr1598 | slr0838 | sml0004 | sll0851 | slr1550 | sll1883 | slr1034 |
| sll1326 | sll1633 | sll0520 | sll0868 | sll1823 | sml0004 | sll0851 | sll1074 | slr1034 | slr1133 |
| sll1326 | slr0018 | sll0520 | slr0994 | sll1056 | sml0004 | sll0851 | slr0649 | slr0444 | slr1034 |
| sll0567 | sll1326 | sll0379 | sll0520 | slr0520 | sml0004 | sll0495 | sll0851 | slr1034 | slr2130 |
| sll1326 | slr0884 | sll0520 | sll1676 | sll0144 | sml0004 | sll0851 | sll1425 | sll1669 | slr1034 |
| sll1326 | sll1342 | sll0520 | sll0927 | sll0467 | sml0004 | sll0502 | sll0851 | slr0585 | slr1034 |
| sll1326 | slr1349 | sll0520 | sll0996 | slr0711 | sml0004 | sll0851 | slr1703 | slr1034 | slr2075 |
| sll0593 | sll1326 | sll0520 | sll0844 | sll0754 | sml0004 | sll0078 | sll0851 | slr1034 | slr2076 |
| sll0220 | sll1326 | sll0520 | sll1615 | sll0569 | sml0004 | sll0851 | slr0557 | sll0416 | slr1034 |
| sll0899 | sll1326 | sll0202 | sll0520 | sll1277 | sml0004 | sll0851 | slr1884 | slr0156 | slr1034 |
| sll1326 | slr1756 | sll0520 | slr0902 | sll1110 | sml0004 | sll0851 | slr1031 | slr1034 | slr1641 |
| sll1085 | sll1326 | sll0520 | sll1144 | sll1865 | sml0004 | sll0851 | slr1793 | slr0542 | slr1034 |
| sll1326 | sll1931 | sll0520 | slr0017 | slr1228 | sml0004 | sll0851 | slr0633 | sll0534 | slr1034 |
| sll0083 | sll1326 | sll0520 | slr1424 | slr0808 | sml0004 | sll0851 | slr1278 | slr0165 | slr1034 |
| sll1326 | slr1755 | sll0520 | slr1423 | slr0082 | sml0004 | sll0851 | slr0783 | sll0030 | slr1034 |
| sll0057 | sll1326 | sll0520 | sll2010 | slr0742 | sml0004 | sll0851 | sll1198 | slr0847 | slr1034 |
| sll0017 | sll1326 | sll0520 | slr0528 | sll0098 | sml0004 | sll0204 | sll0851 | slr0553 | slr1034 |
| sll1185 | sll1326 | sll0520 | slr1351 | slr1646 | sml0004 | sll0851 | sll1750 | slr0812 | slr1034 |
| sll1326 | slr0839 | sll0520 | sll0622 | slr1130 | sml0004 | sll0420 | sll0851 | slr1034 | slr1347 |
| sll1326 | sll1876 | sll0520 | sll0631 | slr0080 | sml0004 | sll0851 | slr1256 | slr1034 | slr1348 |
| sll0900 | sll1326 | sll0520 | slr0787 | slr0551 | sml0004 | sll0851 | sll1639 | slr1034 | slr1791 |
| sll1326 | slr0608 | sll0520 | sll1852 | sll0145 | sml0004 | sll0851 | slr1899 | sll0594 | slr1034 |
| sll1326 | slr0652 | sll0520 | slr1090 | sll0708 | sml0004 | sll0643 | sll0851 | slr0550 | slr1034 |
| sll1326 | slr0084 | sll0520 | sll0902 | slr0679 | sml0004 | sll0851 | slr1844 | sll1058 | slr1034 |
| sll1326 | sll1893 | sll0520 | slr0661 | slr0722 | sml0004 | sll0459 | sll0851 | slr1034 | slr1665 |
| sll1326 | slr0500 | sll0520 | slr0526 | slr0072 | sml0004 | sll0851 | sll0865 | slr0536 | slr1034 |
| sll1326 | slr1560 | sll0520 | sll1249 | sll1547 | sml0004 | sll0851 | slr0733 | slr1034 | slr1874 |
| sll1326 | sll1988 | sll0520 | sll0892 | sll1234 | sml0004 | sll0851 | sll1459 | sll1776 | slr1034 |
| sll1326 | slr1289 | sll0520 | sll0660 | sll0616 | sml0004 | sll0851 | sll0905 | sll0848 | slr1034 |
| sll1326 | sll1556 | sll0520 | slr1779 | slr2073 | sml0004 | sll0402 | ssr3451 | sll0897 | slr1034 |
| sll1326 | ssl3441 | sll0520 | slr0394 | slr1639 | sml0004 | sll0728 | ssr3451 | sll1933 | slr1034 |
| sll1326 | slr0744 | sll0520 | slr2047 | sll1108 | sml0004 | sll0336 | ssr3451 | slr0965 | slr1034 |
| sll1326 | slr0974 | sll0520 | slr0741 | sll0362 | sml0004 | sll1299 | ssr3451 | slr1034 | slr1463 |
| sll1326 | slr1622 | sll0520 | slr1510 | slr0958 | sml0004 | ssl2084 | ssr3451 | sll1098 | slr1034 |
| sll1196 | sll1326 | sll0520 | sll1043 | slr1720 | sml0004 | sll2001 | ssr3451 | slr0434 | slr1034 |
| sll0745 | sll1326 | sll0520 | slr0400 | sll0179 | sml0004 | sll1430 | ssr3451 | sll1261 | slr1034 |
| sll1326 | sll1815 | sll0520 | sll1415 | sll0454 | sml0004 | sll0573 | ssr3451 | sll1099 | slr1034 |
| sll1059 | sll1326 | sll0520 | sll1909 | sll1553 | sml0004 | slr1898 | ssr3451 | slr0752 | slr1034 |
| sll1326 | slr1123 | sll0373 | sll0520 | slr0638 | sml0004 | sll0080 | ssr3451 | slr0952 | slr1034 |
| sll1326 | sll1760 | sll0520 | slr2035 | slr0220 | sml0004 | slr1022 | ssr3451 | slr1034 | slr1511 |
| sll0469 | sll1326 | sll0520 | slr2132 | slr0357 | sml0004 | sll1883 | ssr3451 | sll1605 | slr1034 |
| sll1326 | slr1517 | sll0520 | slr0922 | sll1362 | sml0004 | slr1133 | ssr3451 | sll0990 | slr1034 |
| sll0869 | sll1326 | sll0520 | slr0838 | slr1550 | sml0004 | slr0444 | ssr3451 | sll1633 | slr1034 |
| sll1326 | slr1598 | sll0520 | sll1823 | sll1074 | sml0004 | slr2130 | ssr3451 | slr0018 | slr1034 |
| sll0868 | sll1326 | sll0520 | sll1056 | slr0649 | sml0004 | sll1669 | ssr3451 | sll0567 | slr1034 |

|         |         |         |         |         |         |         |         |         |         |
|---------|---------|---------|---------|---------|---------|---------|---------|---------|---------|
| sll1326 | slr0994 | sll0520 | slr0520 | sll0495 | sml0004 | slr0585 | ssr3451 | slr0884 | slr1034 |
| sll0379 | sll1326 | sll0144 | sll0520 | sll1425 | sml0004 | slr2075 | ssr3451 | sll1342 | slr1034 |
| sll1326 | sll1676 | sll0467 | sll0520 | sll0502 | sml0004 | slr2076 | ssr3451 | slr1034 | slr1349 |
| sll0927 | sll1326 | sll0520 | slr0711 | slr1703 | sml0004 | sll0416 | ssr3451 | sll0593 | slr1034 |
| sll0996 | sll1326 | sll0520 | sll0754 | sll0078 | sml0004 | slr0156 | ssr3451 | sll0220 | slr1034 |
| sll0844 | sll1326 | sll0520 | sll0569 | slr0557 | sml0004 | slr1641 | ssr3451 | sll0899 | slr1034 |
| sll1326 | sll1615 | sll0520 | sll1277 | slr1884 | sml0004 | slr0542 | ssr3451 | slr1034 | slr1756 |
| sll0202 | sll1326 | sll0520 | sll1110 | slr1031 | sml0004 | sll0534 | ssr3451 | sll1085 | slr1034 |
| sll1326 | slr0902 | sll0520 | sll1865 | slr1793 | sml0004 | slr0165 | ssr3451 | sll1931 | slr1034 |
| sll1144 | sll1326 | sll0520 | slr1228 | slr0633 | sml0004 | sll0030 | ssr3451 | sll0083 | slr1034 |
| sll1326 | slr0017 | sll0520 | slr0808 | slr1278 | sml0004 | slr0847 | ssr3451 | slr1034 | slr1755 |
| sll1326 | slr1424 | sll0520 | slr0082 | slr0783 | sml0004 | slr0553 | ssr3451 | sll0057 | slr1034 |
| sll1326 | slr1423 | sll0520 | slr0742 | sll1198 | sml0004 | slr0812 | ssr3451 | sll0017 | slr1034 |
| sll1326 | sll2010 | sll0098 | sll0520 | sll0204 | sml0004 | slr1347 | ssr3451 | sll1185 | slr1034 |
| sll1326 | slr0528 | sll0520 | slr1646 | sll1750 | sml0004 | slr1348 | ssr3451 | slr0839 | slr1034 |
| sll1326 | slr1351 | sll0520 | slr1130 | sll0420 | sml0004 | slr1791 | ssr3451 | sll1876 | slr1034 |
| sll0622 | sll1326 | sll0520 | slr0080 | slr1256 | sml0004 | sll0594 | ssr3451 | sll0900 | slr1034 |
| sll0631 | sll1326 | sll0520 | slr0551 | sll1639 | sml0004 | slr0550 | ssr3451 | slr0608 | slr1034 |
| sll1326 | slr0787 | sll0145 | sll0520 | slr1899 | sml0004 | sll1058 | ssr3451 | slr0652 | slr1034 |
| sll1326 | sll1852 | sll0520 | sll0708 | sll0643 | sml0004 | slr1665 | ssr3451 | slr0084 | slr1034 |
| sll1326 | slr1090 | sll0520 | slr0679 | slr1844 | sml0004 | slr0536 | ssr3451 | sll1893 | slr1034 |
| sll0902 | sll1326 | sll0520 | slr0722 | sll0459 | sml0004 | slr1874 | ssr3451 | slr0500 | slr1034 |
| sll1326 | slr0661 | sll0520 | slr0072 | sll0865 | sml0004 | sll1776 | ssr3451 | slr1034 | slr1560 |
| sll1326 | slr0526 | sll0520 | sll1547 | slr0733 | sml0004 | sll0848 | ssr3451 | sll1988 | slr1034 |
| sll1249 | sll1326 | sll0520 | sll1234 | sll1459 | sml0004 | sll0897 | ssr3451 | slr1034 | slr1289 |
| sll0892 | sll1326 | sll0520 | sll0616 | sll0905 | sml0004 | sll1933 | ssr3451 | sll1556 | slr1034 |
| sll0660 | sll1326 | sll0520 | slr2073 | sll0402 | slr2067 | slr0965 | ssr3451 | slr1034 | ssl3441 |
| sll1326 | slr1779 | sll0520 | slr1639 | sll0728 | slr2067 | slr1463 | ssr3451 | slr0744 | slr1034 |
| sll1326 | slr0394 | sll0520 | sll1108 | sll0336 | slr2067 | sll1098 | ssr3451 | slr0974 | slr1034 |
| sll1326 | slr2047 | sll0362 | sll0520 | sll1299 | slr2067 | slr0434 | ssr3451 | slr1034 | slr1622 |
| sll1326 | slr0741 | sll0520 | slr0958 | slr2067 | ssl2084 | sll1261 | ssr3451 | sll1196 | slr1034 |
| sll1326 | slr1510 | sll0520 | slr1720 | sll2001 | slr2067 | sll1099 | ssr3451 | sll0745 | slr1034 |
| sll1043 | sll1326 | sll0179 | sll0520 | sll1430 | slr2067 | slr0752 | ssr3451 | sll1815 | slr1034 |
| sll1326 | slr0400 | sll0454 | sll0520 | sll0573 | slr2067 | slr0952 | ssr3451 | sll1059 | slr1034 |
| sll1326 | sll1415 | sll0520 | sll1553 | slr1898 | slr2067 | slr1511 | ssr3451 | slr1034 | slr1123 |
| sll1326 | sll1909 | sll0520 | slr0638 | sll0080 | slr2067 | sll1605 | ssr3451 | sll1760 | slr1034 |
| sll0373 | sll1326 | sll0520 | slr0220 | slr1022 | slr2067 | sll0990 | ssr3451 | sll0469 | slr1034 |
| sll1326 | slr2035 | sll0520 | slr0357 | sll1883 | slr2067 | sll1633 | ssr3451 | slr1034 | slr1517 |
| sll1326 | slr2132 | sll0520 | sll1362 | slr1133 | slr2067 | slr0018 | ssr3451 | sll0869 | slr1034 |
| sll1326 | slr0922 | sll0520 | slr1550 | slr0444 | slr2067 | sll0567 | ssr3451 | slr1034 | slr1598 |
| sll1326 | slr0838 | sll0520 | sll1074 | slr2067 | slr2130 | slr0884 | ssr3451 | sll0868 | slr1034 |
| sll1326 | sll1823 | sll0520 | slr0649 | sll1669 | slr2067 | sll1342 | ssr3451 | slr0994 | slr1034 |
| sll1056 | sll1326 | sll0495 | sll0520 | slr0585 | slr2067 | slr1349 | ssr3451 | sll0379 | slr1034 |
| sll1326 | slr0520 | sll0520 | sll1425 | slr2067 | slr2075 | sll0593 | ssr3451 | sll1676 | slr1034 |
| sll0144 | sll1326 | sll0502 | sll0520 | slr2067 | slr2076 | sll0220 | ssr3451 | sll0927 | slr1034 |
| sll0467 | sll1326 | sll0520 | slr1703 | sll0416 | slr2067 | sll0899 | ssr3451 | sll0996 | slr1034 |
| sll1326 | slr0711 | sll0078 | sll0520 | slr0156 | slr2067 | slr1756 | ssr3451 | sll0844 | slr1034 |
| sll0754 | sll1326 | sll0520 | slr0557 | slr1641 | slr2067 | sll1085 | ssr3451 | sll1615 | slr1034 |
| sll0569 | sll1326 | sll0520 | slr1884 | slr0542 | slr2067 | sll1931 | ssr3451 | sll0202 | slr1034 |
| sll1277 | sll1326 | sll0520 | slr1031 | sll0534 | slr2067 | sll0083 | ssr3451 | slr0902 | slr1034 |
| sll1110 | sll1326 | sll0520 | slr1793 | slr0165 | slr2067 | slr1755 | ssr3451 | sll1144 | slr1034 |



|         |         |         |         |         |         |         |         |         |         |
|---------|---------|---------|---------|---------|---------|---------|---------|---------|---------|
| sll1326 | sll1865 | sll0520 | slr0633 | sll0030 | slr2067 | sll0057 | ssr3451 | slr0017 | slr1034 |
| sll1326 | slr1228 | sll0520 | slr1278 | slr0847 | slr2067 | sll0017 | ssr3451 | slr1034 | slr1424 |
| sll1326 | slr0808 | sll0520 | slr0783 | slr0553 | slr2067 | sll1185 | ssr3451 | slr1034 | slr1423 |
| sll1326 | slr0082 | sll0520 | sll1198 | slr0812 | slr2067 | slr0839 | ssr3451 | sll2010 | slr1034 |
| sll1326 | slr0742 | sll0204 | sll0520 | slr1347 | slr2067 | sll1876 | ssr3451 | slr0528 | slr1034 |
| sll0098 | sll1326 | sll0520 | sll1750 | slr1348 | slr2067 | sll0900 | ssr3451 | slr1034 | slr1351 |
| sll1326 | slr1646 | sll0420 | sll0520 | slr1791 | slr2067 | slr0608 | ssr3451 | sll0622 | slr1034 |
| sll1326 | slr1130 | sll0520 | slr1256 | sll0594 | slr2067 | slr0652 | ssr3451 | sll0631 | slr1034 |
| sll1326 | slr0080 | sll0520 | sll1639 | slr0550 | slr2067 | slr0084 | ssr3451 | slr0787 | slr1034 |
| sll1326 | slr0551 | sll0520 | slr1899 | sll1058 | slr2067 | sll1893 | ssr3451 | sll1852 | slr1034 |
| sll0145 | sll1326 | sll0520 | sll0643 | slr1665 | slr2067 | slr0500 | ssr3451 | slr1034 | slr1090 |
| sll0708 | sll1326 | sll0520 | slr1844 | slr0536 | slr2067 | slr1560 | ssr3451 | sll0902 | slr1034 |
| sll1326 | slr0679 | sll0459 | sll0520 | slr1874 | slr2067 | sll1988 | ssr3451 | slr0661 | slr1034 |
| sll1326 | slr0722 | sll0520 | sll0865 | sll1776 | slr2067 | slr1289 | ssr3451 | slr0526 | slr1034 |
| sll1326 | slr0072 | sll0520 | slr0733 | sll0848 | slr2067 | sll1556 | ssr3451 | sll1249 | slr1034 |
| sll1326 | sll1547 | sll0520 | sll1459 | sll0897 | slr2067 | ssl3441 | ssr3451 | sll0892 | slr1034 |
| sll1234 | sll1326 | sll0520 | sll0905 | sll1933 | slr2067 | slr0744 | ssr3451 | sll0660 | slr1034 |
| sll0616 | sll1326 | sll0402 | slr1281 | slr0965 | slr2067 | slr0974 | ssr3451 | slr1034 | slr1779 |
| sll1326 | slr2073 | sll0728 | slr1281 | slr1463 | slr2067 | slr1622 | ssr3451 | slr0394 | slr1034 |
| sll1326 | slr1639 | sll0336 | slr1281 | sll1098 | slr2067 | sll1196 | ssr3451 | slr1034 | slr2047 |
| sll1108 | sll1326 | sll1299 | slr1281 | slr0434 | slr2067 | sll0745 | ssr3451 | slr0741 | slr1034 |
| sll0362 | sll1326 | slr1281 | ssl2084 | sll1261 | slr2067 | sll1815 | ssr3451 | slr1034 | slr1510 |
| sll1326 | slr0958 | sll2001 | slr1281 | sll1099 | slr2067 | sll1059 | ssr3451 | sll1043 | slr1034 |
| sll1326 | slr1720 | sll1430 | slr1281 | slr0752 | slr2067 | slr1123 | ssr3451 | slr0400 | slr1034 |
| sll0179 | sll1326 | sll0573 | slr1281 | slr0952 | slr2067 | sll1760 | ssr3451 | sll1415 | slr1034 |
| sll0454 | sll1326 | slr1281 | slr1898 | slr1511 | slr2067 | sll0469 | ssr3451 | sll1909 | slr1034 |
| sll1326 | sll1553 | sll0080 | slr1281 | sll1605 | slr2067 | slr1517 | ssr3451 | sll0373 | slr1034 |
| sll1326 | slr0638 | slr1022 | slr1281 | sll0990 | slr2067 | sll0869 | ssr3451 | slr1034 | slr2035 |
| sll1326 | slr0220 | sll1883 | slr1281 | sll1633 | slr2067 | slr1598 | ssr3451 | slr1034 | slr2132 |
| sll1326 | slr0357 | slr1133 | slr1281 | slr0018 | slr2067 | sll0868 | ssr3451 | slr0922 | slr1034 |
| sll1326 | sll1362 | slr0444 | slr1281 | sll0567 | slr2067 | slr0994 | ssr3451 | slr0838 | slr1034 |
| sll1326 | slr1550 | slr1281 | slr2130 | slr0884 | slr2067 | sll0379 | ssr3451 | sll1823 | slr1034 |
| sll1074 | sll1326 | sll1669 | slr1281 | sll1342 | slr2067 | sll1676 | ssr3451 | sll1056 | slr1034 |
| sll1326 | slr0649 | slr0585 | slr1281 | slr1349 | slr2067 | sll0927 | ssr3451 | slr0520 | slr1034 |
| sll0495 | sll1326 | slr1281 | slr2075 | sll0593 | slr2067 | sll0996 | ssr3451 | sll0144 | slr1034 |
| sll1326 | sll1425 | slr1281 | slr2076 | sll0220 | slr2067 | sll0844 | ssr3451 | sll0467 | slr1034 |
| sll0502 | sll1326 | sll0416 | slr1281 | sll0899 | slr2067 | sll1615 | ssr3451 | slr0711 | slr1034 |
| sll1326 | slr1703 | slr0156 | slr1281 | slr1756 | slr2067 | sll0202 | ssr3451 | sll0754 | slr1034 |
| sll0078 | sll1326 | slr1281 | slr1641 | sll1085 | slr2067 | slr0902 | ssr3451 | sll0569 | slr1034 |
| sll1326 | slr0557 | slr0542 | slr1281 | sll1931 | slr2067 | sll1144 | ssr3451 | sll1277 | slr1034 |
| sll1326 | slr1884 | sll0534 | slr1281 | sll0083 | slr2067 | slr0017 | ssr3451 | sll1110 | slr1034 |
| sll1326 | slr1031 | slr0165 | slr1281 | slr1755 | slr2067 | slr1424 | ssr3451 | sll1865 | slr1034 |
| sll1326 | slr1793 | sll0030 | slr1281 | sll0057 | slr2067 | slr1423 | ssr3451 | slr1034 | slr1228 |
| sll1326 | slr0633 | slr0847 | slr1281 | sll0017 | slr2067 | sll2010 | ssr3451 | slr0808 | slr1034 |
| sll1326 | slr1278 | slr0553 | slr1281 | sll1185 | slr2067 | slr0528 | ssr3451 | slr0082 | slr1034 |
| sll1326 | slr0783 | slr0812 | slr1281 | slr0839 | slr2067 | slr1351 | ssr3451 | slr0742 | slr1034 |
| sll1198 | sll1326 | slr1281 | slr1347 | sll1876 | slr2067 | sll0622 | ssr3451 | sll0098 | slr1034 |
| sll0204 | sll1326 | slr1281 | slr1348 | sll0900 | slr2067 | sll0631 | ssr3451 | slr1034 | slr1646 |
| sll1326 | sll1750 | slr1281 | slr1791 | slr0608 | slr2067 | slr0787 | ssr3451 | slr1034 | slr1130 |
| sll0420 | sll1326 | sll0594 | slr1281 | slr0652 | slr2067 | sll1852 | ssr3451 | slr0080 | slr1034 |
| sll1326 | slr1256 | slr0550 | slr1281 | slr0084 | slr2067 | slr1090 | ssr3451 | slr0551 | slr1034 |

|         |         |         |         |         |         |         |         |         |         |
|---------|---------|---------|---------|---------|---------|---------|---------|---------|---------|
| sll1326 | sll1639 | sll1058 | slr1281 | sll1893 | slr2067 | sll0902 | ssr3451 | sll0145 | slr1034 |
| sll1326 | slr1899 | slr1281 | slr1665 | slr0500 | slr2067 | slr0661 | ssr3451 | sll0708 | slr1034 |
| sll0643 | sll1326 | slr0536 | slr1281 | slr1560 | slr2067 | slr0526 | ssr3451 | slr0679 | slr1034 |
| sll1326 | slr1844 | slr1281 | slr1874 | sll1988 | slr2067 | sll1249 | ssr3451 | slr0722 | slr1034 |
| sll0459 | sll1326 | sll1776 | slr1281 | slr1289 | slr2067 | sll0892 | ssr3451 | slr0072 | slr1034 |
| sll0865 | sll1326 | sll0848 | slr1281 | sll1556 | slr2067 | sll0660 | ssr3451 | sll1547 | slr1034 |
| sll1326 | slr0733 | sll0897 | slr1281 | slr2067 | ssl3441 | slr1779 | ssr3451 | sll1234 | slr1034 |
| sll1326 | sll1459 | sll1933 | slr1281 | slr0744 | slr2067 | slr0394 | ssr3451 | sll0616 | slr1034 |
| sll0905 | sll1326 | slr0965 | slr1281 | slr0974 | slr2067 | slr2047 | ssr3451 | slr1034 | slr2073 |
| sll0402 | slr1329 | slr1281 | slr1463 | slr1622 | slr2067 | slr0741 | ssr3451 | slr1034 | slr1639 |
| sll0728 | slr1329 | sll1098 | slr1281 | sll1196 | slr2067 | slr1510 | ssr3451 | sll1108 | slr1034 |
| sll0336 | slr1329 | slr0434 | slr1281 | sll0745 | slr2067 | sll1043 | ssr3451 | sll0362 | slr1034 |
| sll1299 | slr1329 | sll1261 | slr1281 | sll1815 | slr2067 | slr0400 | ssr3451 | slr0958 | slr1034 |
| slr1329 | ssl2084 | sll1099 | slr1281 | sll1059 | slr2067 | sll1415 | ssr3451 | slr1034 | slr1720 |
| sll2001 | slr1329 | slr0752 | slr1281 | slr1123 | slr2067 | sll1909 | ssr3451 | sll0179 | slr1034 |
| sll1430 | slr1329 | slr0952 | slr1281 | sll1760 | slr2067 | sll0373 | ssr3451 | sll0454 | slr1034 |
| sll0573 | slr1329 | slr1281 | slr1511 | sll0469 | slr2067 | slr2035 | ssr3451 | sll1553 | slr1034 |
| slr1329 | slr1898 | sll1605 | slr1281 | slr1517 | slr2067 | slr2132 | ssr3451 | slr0638 | slr1034 |
| sll0080 | slr1329 | sll0990 | slr1281 | sll0869 | slr2067 | slr0922 | ssr3451 | slr0220 | slr1034 |
| slr1022 | slr1329 | sll1633 | slr1281 | slr1598 | slr2067 | slr0838 | ssr3451 | slr0357 | slr1034 |
| sll1883 | slr1329 | slr0018 | slr1281 | sll0868 | slr2067 | sll1823 | ssr3451 | sll1362 | slr1034 |
| slr1133 | slr1329 | sll0567 | slr1281 | slr0994 | slr2067 | sll1056 | ssr3451 | slr1034 | slr1550 |
| slr0444 | slr1329 | slr0884 | slr1281 | sll0379 | slr2067 | slr0520 | ssr3451 | sll1074 | slr1034 |
| slr1329 | slr2130 | sll1342 | slr1281 | sll1676 | slr2067 | sll0144 | ssr3451 | slr0649 | slr1034 |
| sll1669 | slr1329 | slr1281 | slr1349 | sll0927 | slr2067 | sll0467 | ssr3451 | sll0495 | slr1034 |
| slr0585 | slr1329 | sll0593 | slr1281 | sll0996 | slr2067 | slr0711 | ssr3451 | sll1425 | slr1034 |
| slr1329 | slr2075 | sll0220 | slr1281 | sll0844 | slr2067 | sll0754 | ssr3451 | sll0502 | slr1034 |
| slr1329 | slr2076 | sll0899 | slr1281 | sll1615 | slr2067 | sll0569 | ssr3451 | slr1034 | slr1703 |
| sll0416 | slr1329 | slr1281 | slr1756 | sll0202 | slr2067 | sll1277 | ssr3451 | sll0078 | slr1034 |
| slr0156 | slr1329 | sll1085 | slr1281 | slr0902 | slr2067 | sll1110 | ssr3451 | slr0557 | slr1034 |
| slr1329 | slr1641 | sll1931 | slr1281 | sll1144 | slr2067 | sll1865 | ssr3451 | slr1034 | slr1884 |
| slr0542 | slr1329 | sll0083 | slr1281 | slr0017 | slr2067 | slr1228 | ssr3451 | slr1031 | slr1034 |
| sll0534 | slr1329 | slr1281 | slr1755 | slr1424 | slr2067 | slr0808 | ssr3451 | slr1034 | slr1793 |
| slr0165 | slr1329 | sll0057 | slr1281 | slr1423 | slr2067 | slr0082 | ssr3451 | slr0633 | slr1034 |
| sll0030 | slr1329 | sll0017 | slr1281 | sll2010 | slr2067 | slr0742 | ssr3451 | slr1034 | slr1278 |
| slr0847 | slr1329 | sll1185 | slr1281 | slr0528 | slr2067 | sll0098 | ssr3451 | slr0783 | slr1034 |
| slr0553 | slr1329 | slr0839 | slr1281 | slr1351 | slr2067 | slr1646 | ssr3451 | sll1198 | slr1034 |
| slr0812 | slr1329 | sll1876 | slr1281 | sll0622 | slr2067 | slr1130 | ssr3451 | sll0204 | slr1034 |
| slr1329 | slr1347 | sll0900 | slr1281 | sll0631 | slr2067 | slr0080 | ssr3451 | sll1750 | slr1034 |
| slr1329 | slr1348 | slr0608 | slr1281 | slr0787 | slr2067 | slr0551 | ssr3451 | sll0420 | slr1034 |
| slr1329 | slr1791 | slr0652 | slr1281 | sll1852 | slr2067 | sll0145 | ssr3451 | slr1034 | slr1256 |
| sll0594 | slr1329 | slr0084 | slr1281 | slr1090 | slr2067 | sll0708 | ssr3451 | sll1639 | slr1034 |
| slr0550 | slr1329 | sll1893 | slr1281 | sll0902 | slr2067 | slr0679 | ssr3451 | slr1034 | slr1899 |
| sll1058 | slr1329 | slr0500 | slr1281 | slr0661 | slr2067 | slr0722 | ssr3451 | sll0643 | slr1034 |
| slr1329 | slr1665 | slr1281 | slr1560 | slr0526 | slr2067 | slr0072 | ssr3451 | slr1034 | slr1844 |
| slr0536 | slr1329 | sll1988 | slr1281 | sll1249 | slr2067 | sll1547 | ssr3451 | sll0459 | slr1034 |
| slr1329 | slr1874 | slr1281 | slr1289 | sll0892 | slr2067 | sll1234 | ssr3451 | sll0865 | slr1034 |
| sll1776 | slr1329 | sll1556 | slr1281 | sll0660 | slr2067 | sll0616 | ssr3451 | slr0733 | slr1034 |
| sll0848 | slr1329 | slr1281 | ssl3441 | slr1779 | slr2067 | slr2073 | ssr3451 | sll1459 | slr1034 |
| sll0897 | slr1329 | slr0744 | slr1281 | slr0394 | slr2067 | slr1639 | ssr3451 | sll0905 | slr1034 |
| sll1933 | slr1329 | slr0974 | slr1281 | slr2047 | slr2067 | sll1108 | ssr3451 | sll0402 | slr1185 |

|         |         |         |         |         |         |         |         |         |         |
|---------|---------|---------|---------|---------|---------|---------|---------|---------|---------|
| slr0965 | slr1329 | slr1281 | slr1622 | slr0741 | slr2067 | sll0362 | ssr3451 | sll0728 | slr1185 |
| slr1329 | slr1463 | sll1196 | slr1281 | slr1510 | slr2067 | slr0958 | ssr3451 | sll0336 | slr1185 |
| sll1098 | slr1329 | sll0745 | slr1281 | sll1043 | slr2067 | slr1720 | ssr3451 | sll1299 | slr1185 |
| slr0434 | slr1329 | sll1815 | slr1281 | slr0400 | slr2067 | sll0179 | ssr3451 | slr1185 | ssl2084 |
| sll1261 | slr1329 | sll1059 | slr1281 | sll1415 | slr2067 | sll0454 | ssr3451 | sll2001 | slr1185 |
| sll1099 | slr1329 | slr1123 | slr1281 | sll1909 | slr2067 | sll1553 | ssr3451 | sll1430 | slr1185 |
| slr0752 | slr1329 | sll1760 | slr1281 | sll0373 | slr2067 | slr0638 | ssr3451 | sll0573 | slr1185 |
| slr0952 | slr1329 | sll0469 | slr1281 | slr2035 | slr2067 | slr0220 | ssr3451 | slr1185 | slr1898 |
| slr1329 | slr1511 | slr1281 | slr1517 | slr2067 | slr2132 | slr0357 | ssr3451 | sll0080 | slr1185 |
| sll1605 | slr1329 | sll0869 | slr1281 | slr0922 | slr2067 | sll1362 | ssr3451 | slr1022 | slr1185 |
| sll0990 | slr1329 | slr1281 | slr1598 | slr0838 | slr2067 | slr1550 | ssr3451 | sll1883 | slr1185 |
| sll1633 | slr1329 | sll0868 | slr1281 | sll1823 | slr2067 | sll1074 | ssr3451 | slr1133 | slr1185 |
| slr0018 | slr1329 | slr0994 | slr1281 | sll1056 | slr2067 | slr0649 | ssr3451 | slr0444 | slr1185 |
| sll0567 | slr1329 | sll0379 | slr1281 | slr0520 | slr2067 | sll0495 | ssr3451 | slr1185 | slr2130 |
| slr0884 | slr1329 | sll1676 | slr1281 | sll0144 | slr2067 | sll1425 | ssr3451 | sll1669 | slr1185 |
| sll1342 | slr1329 | sll0927 | slr1281 | sll0467 | slr2067 | sll0502 | ssr3451 | slr0585 | slr1185 |
| slr1329 | slr1349 | sll0996 | slr1281 | slr0711 | slr2067 | slr1703 | ssr3451 | slr1185 | slr2075 |
| sll0593 | slr1329 | sll0844 | slr1281 | sll0754 | slr2067 | sll0078 | ssr3451 | slr1185 | slr2076 |
| sll0220 | slr1329 | sll1615 | slr1281 | sll0569 | slr2067 | slr0557 | ssr3451 | sll0416 | slr1185 |
| sll0899 | slr1329 | sll0202 | slr1281 | sll1277 | slr2067 | slr1884 | ssr3451 | slr0156 | slr1185 |
| slr1329 | slr1756 | slr0902 | slr1281 | sll1110 | slr2067 | slr1031 | ssr3451 | slr1185 | slr1641 |
| sll1085 | slr1329 | sll1144 | slr1281 | sll1865 | slr2067 | slr1793 | ssr3451 | slr0542 | slr1185 |
| sll1931 | slr1329 | slr0017 | slr1281 | slr1228 | slr2067 | slr0633 | ssr3451 | sll0534 | slr1185 |
| sll0083 | slr1329 | slr1281 | slr1424 | slr0808 | slr2067 | slr1278 | ssr3451 | slr0165 | slr1185 |
| slr1329 | slr1755 | slr1281 | slr1423 | slr0082 | slr2067 | slr0783 | ssr3451 | sll0030 | slr1185 |
| sll0057 | slr1329 | sll2010 | slr1281 | slr0742 | slr2067 | sll1198 | ssr3451 | slr0847 | slr1185 |
| sll0017 | slr1329 | slr0528 | slr1281 | sll0098 | slr2067 | sll0204 | ssr3451 | slr0553 | slr1185 |
| sll1185 | slr1329 | slr1281 | slr1351 | slr1646 | slr2067 | sll1750 | ssr3451 | slr0812 | slr1185 |
| slr0839 | slr1329 | sll0622 | slr1281 | slr1130 | slr2067 | sll0420 | ssr3451 | slr1185 | slr1347 |
| sll1876 | slr1329 | sll0631 | slr1281 | slr0080 | slr2067 | slr1256 | ssr3451 | slr1185 | slr1348 |
| sll0900 | slr1329 | slr0787 | slr1281 | slr0551 | slr2067 | sll1639 | ssr3451 | slr1185 | slr1791 |
| slr0608 | slr1329 | sll1852 | slr1281 | sll0145 | slr2067 | slr1899 | ssr3451 | sll0594 | slr1185 |
| slr0652 | slr1329 | slr1090 | slr1281 | sll0708 | slr2067 | sll0643 | ssr3451 | slr0550 | slr1185 |
| slr0084 | slr1329 | sll0902 | slr1281 | slr0679 | slr2067 | slr1844 | ssr3451 | sll1058 | slr1185 |
| sll1893 | slr1329 | slr0661 | slr1281 | slr0722 | slr2067 | sll0459 | ssr3451 | slr1185 | slr1665 |
| slr0500 | slr1329 | slr0526 | slr1281 | slr0072 | slr2067 | sll0865 | ssr3451 | slr0536 | slr1185 |
| slr1329 | slr1560 | sll1249 | slr1281 | sll1547 | slr2067 | slr0733 | ssr3451 | slr1185 | slr1874 |
| sll1988 | slr1329 | sll0892 | slr1281 | sll1234 | slr2067 | sll1459 | ssr3451 | sll1776 | slr1185 |
| slr1289 | slr1329 | sll0660 | slr1281 | sll0616 | slr2067 | sll0905 | ssr3451 | sll0848 | slr1185 |
| sll1556 | slr1329 | slr1281 | slr1779 | slr2067 | slr2073 | sll0402 | smr0006 | sll0897 | slr1185 |
| slr1329 | ssl3441 | slr0394 | slr1281 | slr1639 | slr2067 | sll0728 | smr0006 | sll1933 | slr1185 |
| slr0744 | slr1329 | slr1281 | slr2047 | sll1108 | slr2067 | sll0336 | smr0006 | slr0965 | slr1185 |
| slr0974 | slr1329 | slr0741 | slr1281 | sll0362 | slr2067 | sll1299 | smr0006 | slr1185 | slr1463 |
| slr1329 | slr1622 | slr1281 | slr1510 | slr0958 | slr2067 | smr0006 | ssl2084 | sll1098 | slr1185 |
| sll1196 | slr1329 | sll1043 | slr1281 | slr1720 | slr2067 | sll2001 | smr0006 | slr0434 | slr1185 |
| sll0745 | slr1329 | slr0400 | slr1281 | sll0179 | slr2067 | sll1430 | smr0006 | sll1261 | slr1185 |
| sll1815 | slr1329 | sll1415 | slr1281 | sll0454 | slr2067 | sll0573 | smr0006 | sll1099 | slr1185 |
| sll1059 | slr1329 | sll1909 | slr1281 | sll1553 | slr2067 | slr1898 | smr0006 | slr0752 | slr1185 |
| slr1123 | slr1329 | sll0373 | slr1281 | slr0638 | slr2067 | sll0080 | smr0006 | slr0952 | slr1185 |
| sll1760 | slr1329 | slr1281 | slr2035 | slr0220 | slr2067 | slr1022 | smr0006 | slr1185 | slr1511 |
| sll0469 | slr1329 | slr1281 | slr2132 | slr0357 | slr2067 | sll1883 | smr0006 | sll1605 | slr1185 |

|         |         |         |         |         |         |         |         |         |         |
|---------|---------|---------|---------|---------|---------|---------|---------|---------|---------|
| slr1329 | slr1517 | slr0922 | slr1281 | sll1362 | slr2067 | slr1133 | smr0006 | sll0990 | slr1185 |
| sll0869 | slr1329 | slr0838 | slr1281 | slr1550 | slr2067 | slr0444 | smr0006 | sll1633 | slr1185 |
| slr1329 | slr1598 | sll1823 | slr1281 | sll1074 | slr2067 | slr2130 | smr0006 | slr0018 | slr1185 |
| sll0868 | slr1329 | sll1056 | slr1281 | slr0649 | slr2067 | sll1669 | smr0006 | sll0567 | slr1185 |
| slr0994 | slr1329 | slr0520 | slr1281 | sll0495 | slr2067 | slr0585 | smr0006 | slr0884 | slr1185 |
| sll0379 | slr1329 | sll0144 | slr1281 | sll1425 | slr2067 | slr2075 | smr0006 | sll1342 | slr1185 |
| sll1676 | slr1329 | sll0467 | slr1281 | sll0502 | slr2067 | slr2076 | smr0006 | slr1185 | slr1349 |
| sll0927 | slr1329 | slr0711 | slr1281 | slr1703 | slr2067 | sll0416 | smr0006 | sll0593 | slr1185 |
| sll0996 | slr1329 | sll0754 | slr1281 | sll0078 | slr2067 | slr0156 | smr0006 | sll0220 | slr1185 |
| sll0844 | slr1329 | sll0569 | slr1281 | slr0557 | slr2067 | slr1641 | smr0006 | sll0899 | slr1185 |
| sll1615 | slr1329 | sll1277 | slr1281 | slr1884 | slr2067 | slr0542 | smr0006 | slr1185 | slr1756 |
| sll0202 | slr1329 | sll1110 | slr1281 | slr1031 | slr2067 | sll0534 | smr0006 | sll1085 | slr1185 |
| slr0902 | slr1329 | sll1865 | slr1281 | slr1793 | slr2067 | slr0165 | smr0006 | sll1931 | slr1185 |
| sll1144 | slr1329 | slr1228 | slr1281 | slr0633 | slr2067 | sll0030 | smr0006 | sll0083 | slr1185 |
| slr0017 | slr1329 | slr0808 | slr1281 | slr1278 | slr2067 | slr0847 | smr0006 | slr1185 | slr1755 |
| slr1329 | slr1424 | slr0082 | slr1281 | slr0783 | slr2067 | slr0553 | smr0006 | sll0057 | slr1185 |
| slr1329 | slr1423 | slr0742 | slr1281 | sll1198 | slr2067 | slr0812 | smr0006 | sll0017 | slr1185 |
| sll2010 | slr1329 | sll0098 | slr1281 | sll0204 | slr2067 | slr1347 | smr0006 | sll1185 | slr1185 |
| slr0528 | slr1329 | slr1281 | slr1646 | sll1750 | slr2067 | slr1348 | smr0006 | slr0839 | slr1185 |
| slr1329 | slr1351 | slr1130 | slr1281 | sll0420 | slr2067 | slr1791 | smr0006 | sll1876 | slr1185 |
| sll0622 | slr1329 | slr0080 | slr1281 | slr1256 | slr2067 | sll0594 | smr0006 | sll0900 | slr1185 |
| sll0631 | slr1329 | slr0551 | slr1281 | sll1639 | slr2067 | slr0550 | smr0006 | slr0608 | slr1185 |
| slr0787 | slr1329 | sll0145 | slr1281 | slr1899 | slr2067 | sll1058 | smr0006 | slr0652 | slr1185 |
| sll1852 | slr1329 | sll0708 | slr1281 | sll0643 | slr2067 | slr1665 | smr0006 | slr0084 | slr1185 |
| slr1090 | slr1329 | slr0679 | slr1281 | slr1844 | slr2067 | slr0536 | smr0006 | sll1893 | slr1185 |
| sll0902 | slr1329 | slr0722 | slr1281 | sll0459 | slr2067 | slr1874 | smr0006 | slr0500 | slr1185 |
| slr0661 | slr1329 | slr0072 | slr1281 | sll0865 | slr2067 | sll1776 | smr0006 | slr1185 | slr1560 |
| slr0526 | slr1329 | sll1547 | slr1281 | slr0733 | slr2067 | sll0848 | smr0006 | sll1988 | slr1185 |
| sll1249 | slr1329 | sll1234 | slr1281 | sll1459 | slr2067 | sll0897 | smr0006 | slr1185 | slr1289 |
| sll0892 | slr1329 | sll0616 | slr1281 | sll0905 | slr2067 | sll1933 | smr0006 | sll1556 | slr1185 |
| sll0660 | slr1329 | slr1281 | slr2073 | sll0402 | slr1986 | slr0965 | smr0006 | slr1185 | ssl3441 |
| slr1329 | slr1779 | slr1281 | slr1639 | sll0728 | slr1986 | slr1463 | smr0006 | slr0744 | slr1185 |
| slr0394 | slr1329 | sll1108 | slr1281 | sll0336 | slr1986 | sll1098 | smr0006 | slr0974 | slr1185 |
| slr1329 | slr2047 | sll0362 | slr1281 | sll1299 | slr1986 | slr0434 | smr0006 | slr1185 | slr1622 |
| slr0741 | slr1329 | slr0958 | slr1281 | slr1986 | ssl2084 | sll1261 | smr0006 | sll1196 | slr1185 |
| slr1329 | slr1510 | slr1281 | slr1720 | sll2001 | slr1986 | sll1099 | smr0006 | sll0745 | slr1185 |
| sll1043 | slr1329 | sll0179 | slr1281 | sll1430 | slr1986 | slr0752 | smr0006 | sll1815 | slr1185 |
| slr0400 | slr1329 | sll0454 | slr1281 | sll0573 | slr1986 | slr0952 | smr0006 | sll1059 | slr1185 |
| sll1415 | slr1329 | sll1553 | slr1281 | slr1898 | slr1986 | slr1511 | smr0006 | slr1123 | slr1185 |
| sll1909 | slr1329 | slr0638 | slr1281 | sll0080 | slr1986 | sll1605 | smr0006 | sll1760 | slr1185 |
| sll0373 | slr1329 | slr0220 | slr1281 | slr1022 | slr1986 | sll0990 | smr0006 | sll0469 | slr1185 |
| slr1329 | slr2035 | slr0357 | slr1281 | sll1883 | slr1986 | sll1633 | smr0006 | slr1185 | slr1517 |
| slr1329 | slr2132 | sll1362 | slr1281 | slr1133 | slr1986 | slr0018 | smr0006 | sll0869 | slr1185 |
| slr0922 | slr1329 | slr1281 | slr1550 | slr0444 | slr1986 | sll0567 | smr0006 | slr1185 | slr1598 |
| slr0838 | slr1329 | sll1074 | slr1281 | slr1986 | slr2130 | slr0884 | smr0006 | sll0868 | slr1185 |
| sll1823 | slr1329 | slr0649 | slr1281 | sll1669 | slr1986 | sll1342 | smr0006 | slr0994 | slr1185 |
| sll1056 | slr1329 | sll0495 | slr1281 | slr0585 | slr1986 | slr1349 | smr0006 | sll0379 | slr1185 |
| slr0520 | slr1329 | sll1425 | slr1281 | slr1986 | slr2075 | sll0593 | smr0006 | sll1676 | slr1185 |
| sll0144 | slr1329 | sll0502 | slr1281 | slr1986 | slr2076 | sll0220 | smr0006 | sll0927 | slr1185 |
| sll0467 | slr1329 | slr1281 | slr1703 | sll0416 | slr1986 | sll0899 | smr0006 | sll0996 | slr1185 |
| slr0711 | slr1329 | sll0078 | slr1281 | slr0156 | slr1986 | slr1756 | smr0006 | sll0844 | slr1185 |

|         |         |         |         |         |         |         |         |         |         |
|---------|---------|---------|---------|---------|---------|---------|---------|---------|---------|
| slI0754 | slr1329 | slr0557 | slr1281 | slr1641 | slr1986 | slI1085 | smr0006 | slI1615 | slr1185 |
| slI0569 | slr1329 | slr1281 | slr1884 | slr0542 | slr1986 | slI1931 | smr0006 | slI0202 | slr1185 |
| slI1277 | slr1329 | slr1031 | slr1281 | slI0534 | slr1986 | slI0083 | smr0006 | slr0902 | slr1185 |
| slI1110 | slr1329 | slr1281 | slr1793 | slr0165 | slr1986 | slr1755 | smr0006 | slI1144 | slr1185 |
| slI1865 | slr1329 | slr0633 | slr1281 | slI0030 | slr1986 | slI0057 | smr0006 | slr0017 | slr1185 |
| slr1228 | slr1329 | slr1278 | slr1281 | slr0847 | slr1986 | slI0017 | smr0006 | slr1185 | slr1424 |
| slr0808 | slr1329 | slr0783 | slr1281 | slr0553 | slr1986 | slI1185 | smr0006 | slr1185 | slr1423 |
| slr0082 | slr1329 | slI1198 | slr1281 | slr0812 | slr1986 | slr0839 | smr0006 | slI2010 | slr1185 |
| slr0742 | slr1329 | slI0204 | slr1281 | slr1347 | slr1986 | slI1876 | smr0006 | slr0528 | slr1185 |
| slI0098 | slr1329 | slI1750 | slr1281 | slr1348 | slr1986 | slI0900 | smr0006 | slr1185 | slr1351 |
| slr1329 | slr1646 | slI0420 | slr1281 | slr1791 | slr1986 | slr0608 | smr0006 | slI0622 | slr1185 |
| slr1130 | slr1329 | slr1256 | slr1281 | slI0594 | slr1986 | slr0652 | smr0006 | slI0631 | slr1185 |
| slr0080 | slr1329 | slI1639 | slr1281 | slr0550 | slr1986 | slr0084 | smr0006 | slr0787 | slr1185 |
| slr0551 | slr1329 | slr1281 | slr1899 | slI1058 | slr1986 | slI1893 | smr0006 | slI1852 | slr1185 |
| slI0145 | slr1329 | slI0643 | slr1281 | slr1665 | slr1986 | slr0500 | smr0006 | slr1090 | slr1185 |
| slI0708 | slr1329 | slr1281 | slr1844 | slr0536 | slr1986 | slr1560 | smr0006 | slI0902 | slr1185 |
| slr0679 | slr1329 | slI0459 | slr1281 | slr1874 | slr1986 | slI1988 | smr0006 | slr0661 | slr1185 |
| slr0722 | slr1329 | slI0865 | slr1281 | slI1776 | slr1986 | slr1289 | smr0006 | slr0526 | slr1185 |
| slr0072 | slr1329 | slr0733 | slr1281 | slI0848 | slr1986 | slI1556 | smr0006 | slI1249 | slr1185 |
| slI1547 | slr1329 | slI1459 | slr1281 | slI0897 | slr1986 | smr0006 | ssl3441 | slI0892 | slr1185 |
| slI1234 | slr1329 | slI0905 | slr1281 | slI1933 | slr1986 | slr0744 | smr0006 | slI0660 | slr1185 |
| slI0616 | slr1329 | slI0402 | slr1280 | slr0965 | slr1986 | slr0974 | smr0006 | slr1185 | slr1779 |
| slr1329 | slr2073 | slI0728 | slr1280 | slr1463 | slr1986 | slr1622 | smr0006 | slr0394 | slr1185 |
| slr1329 | slr1639 | slI0336 | slr1280 | slI1098 | slr1986 | slI1196 | smr0006 | slr1185 | slr2047 |
| slI1108 | slr1329 | slI1299 | slr1280 | slr0434 | slr1986 | slI0745 | smr0006 | slr0741 | slr1185 |
| slI0362 | slr1329 | slr1280 | ssl2084 | slI1261 | slr1986 | slI1815 | smr0006 | slr1185 | slr1510 |
| slr0958 | slr1329 | slI2001 | slr1280 | slI1099 | slr1986 | slI1059 | smr0006 | slI1043 | slr1185 |
| slr1329 | slr1720 | slI1430 | slr1280 | slr0752 | slr1986 | slr1123 | smr0006 | slr0400 | slr1185 |
| slI0179 | slr1329 | slI0573 | slr1280 | slr0952 | slr1986 | slI1760 | smr0006 | slI1415 | slr1185 |
| slI0454 | slr1329 | slr1280 | slr1898 | slr1511 | slr1986 | slI0469 | smr0006 | slI1909 | slr1185 |
| slI1553 | slr1329 | slI0080 | slr1280 | slI1605 | slr1986 | slr1517 | smr0006 | slI0373 | slr1185 |
| slr0638 | slr1329 | slr1022 | slr1280 | slI0990 | slr1986 | slI0869 | smr0006 | slr1185 | slr2035 |
| slr0220 | slr1329 | slI1883 | slr1280 | slI1633 | slr1986 | slr1598 | smr0006 | slr1185 | slr2132 |
| slr0357 | slr1329 | slr1133 | slr1280 | slr0018 | slr1986 | slI0868 | smr0006 | slr0922 | slr1185 |
| slI1362 | slr1329 | slr0444 | slr1280 | slI0567 | slr1986 | slr0994 | smr0006 | slr0838 | slr1185 |
| slr1329 | slr1550 | slr1280 | slr2130 | slr0884 | slr1986 | slI0379 | smr0006 | slI1823 | slr1185 |
| slI1074 | slr1329 | slI1669 | slr1280 | slI1342 | slr1986 | slI1676 | smr0006 | slI1056 | slr1185 |
| slr0649 | slr1329 | slr0585 | slr1280 | slr1349 | slr1986 | slI0927 | smr0006 | slr0520 | slr1185 |
| slI0495 | slr1329 | slr1280 | slr2075 | slI0593 | slr1986 | slI0996 | smr0006 | slI0144 | slr1185 |
| slI1425 | slr1329 | slr1280 | slr2076 | slI0220 | slr1986 | slI0844 | smr0006 | slI0467 | slr1185 |
| slI0502 | slr1329 | slI0416 | slr1280 | slI0899 | slr1986 | slI1615 | smr0006 | slr0711 | slr1185 |
| slr1329 | slr1703 | slr0156 | slr1280 | slr1756 | slr1986 | slI0202 | smr0006 | slI0754 | slr1185 |
| slI0078 | slr1329 | slr1280 | slr1641 | slI1085 | slr1986 | slr0902 | smr0006 | slI0569 | slr1185 |
| slr0557 | slr1329 | slr0542 | slr1280 | slI1931 | slr1986 | slI1144 | smr0006 | slI1277 | slr1185 |
| slr1329 | slr1884 | slI0534 | slr1280 | slI0083 | slr1986 | slr0017 | smr0006 | slI1110 | slr1185 |
| slr1031 | slr1329 | slr0165 | slr1280 | slr1755 | slr1986 | slr1424 | smr0006 | slI1865 | slr1185 |
| slr1329 | slr1793 | slI0030 | slr1280 | slI0057 | slr1986 | slr1423 | smr0006 | slr1185 | slr1228 |
| slr0633 | slr1329 | slr0847 | slr1280 | slI0017 | slr1986 | slI2010 | smr0006 | slr0808 | slr1185 |
| slr1278 | slr1329 | slr0553 | slr1280 | slI1185 | slr1986 | slr0528 | smr0006 | slr0082 | slr1185 |
| slr0783 | slr1329 | slr0812 | slr1280 | slr0839 | slr1986 | slr1351 | smr0006 | slr0742 | slr1185 |
| slI1198 | slr1329 | slr1280 | slr1347 | slI1876 | slr1986 | slI0622 | smr0006 | slI0098 | slr1185 |

|         |         |         |         |         |         |         |         |         |         |
|---------|---------|---------|---------|---------|---------|---------|---------|---------|---------|
| slI0204 | slr1329 | slr1280 | slr1348 | slI0900 | slr1986 | slI0631 | smr0006 | slr1185 | slr1646 |
| slI1750 | slr1329 | slr1280 | slr1791 | slr0608 | slr1986 | slr0787 | smr0006 | slr1130 | slr1185 |
| slI0420 | slr1329 | slI0594 | slr1280 | slr0652 | slr1986 | slI1852 | smr0006 | slr0080 | slr1185 |
| slr1256 | slr1329 | slr0550 | slr1280 | slr0084 | slr1986 | slr1090 | smr0006 | slr0551 | slr1185 |
| slI1639 | slr1329 | slI1058 | slr1280 | slI1893 | slr1986 | slI0902 | smr0006 | slI0145 | slr1185 |
| slr1329 | slr1899 | slr1280 | slr1665 | slr0500 | slr1986 | slr0661 | smr0006 | slI0708 | slr1185 |
| slI0643 | slr1329 | slr0536 | slr1280 | slr1560 | slr1986 | slr0526 | smr0006 | slr0679 | slr1185 |
| slr1329 | slr1844 | slr1280 | slr1874 | slI1988 | slr1986 | slI1249 | smr0006 | slr0722 | slr1185 |
| slI0459 | slr1329 | slI1776 | slr1280 | slr1289 | slr1986 | slI0892 | smr0006 | slr0072 | slr1185 |
| slI0865 | slr1329 | slI0848 | slr1280 | slI1556 | slr1986 | slI0660 | smr0006 | slI1547 | slr1185 |
| slr0733 | slr1329 | slI0897 | slr1280 | slr1986 | ssl3441 | slr1779 | smr0006 | slI1234 | slr1185 |
| slI1459 | slr1329 | slI1933 | slr1280 | slr0744 | slr1986 | slr0394 | smr0006 | slI0616 | slr1185 |
| slI0905 | slr1329 | slr0965 | slr1280 | slr0974 | slr1986 | slr2047 | smr0006 | slr1185 | slr2073 |
| slI0402 | slI1325 | slr1280 | slr1463 | slr1622 | slr1986 | slr0741 | smr0006 | slr1185 | slr1639 |
| slI0728 | slI1325 | slI1098 | slr1280 | slI1196 | slr1986 | slr1510 | smr0006 | slI1108 | slr1185 |
| slI0336 | slI1325 | slr0434 | slr1280 | slI0745 | slr1986 | slI1043 | smr0006 | slI0362 | slr1185 |
| slI1299 | slI1325 | slI1261 | slr1280 | slI1815 | slr1986 | slr0400 | smr0006 | slr0958 | slr1185 |
| slI1325 | ssl2084 | slI1099 | slr1280 | slI1059 | slr1986 | slI1415 | smr0006 | slr1185 | slr1720 |
| slI1325 | slI2001 | slr0752 | slr1280 | slr1123 | slr1986 | slI1909 | smr0006 | slI0179 | slr1185 |
| slI1325 | slI1430 | slr0952 | slr1280 | slI1760 | slr1986 | slI0373 | smr0006 | slI0454 | slr1185 |
| slI0573 | slI1325 | slr1280 | slr1511 | slI0469 | slr1986 | slr2035 | smr0006 | slI1553 | slr1185 |
| slI1325 | slr1898 | slI1605 | slr1280 | slr1517 | slr1986 | slr2132 | smr0006 | slr0638 | slr1185 |
| slI0080 | slI1325 | slI0990 | slr1280 | slI0869 | slr1986 | slr0922 | smr0006 | slr0220 | slr1185 |
| slI1325 | slr1022 | slI1633 | slr1280 | slr1598 | slr1986 | slr0838 | smr0006 | slr0357 | slr1185 |
| slI1325 | slI1883 | slr0018 | slr1280 | slI0868 | slr1986 | slI1823 | smr0006 | slI1362 | slr1185 |
| slI1325 | slr1133 | slI0567 | slr1280 | slr0994 | slr1986 | slI1056 | smr0006 | slr1185 | slr1550 |
| slI1325 | slr0444 | slr0884 | slr1280 | slI0379 | slr1986 | slr0520 | smr0006 | slI1074 | slr1185 |
| slI1325 | slr2130 | slI1342 | slr1280 | slI1676 | slr1986 | slI0144 | smr0006 | slr0649 | slr1185 |
| slI1325 | slI1669 | slr1280 | slr1349 | slI0927 | slr1986 | slI0467 | smr0006 | slI0495 | slr1185 |
| slI1325 | slr0585 | slI0593 | slr1280 | slI0996 | slr1986 | slr0711 | smr0006 | slI1425 | slr1185 |
| slI1325 | slr2075 | slI0220 | slr1280 | slI0844 | slr1986 | slI0754 | smr0006 | slI0502 | slr1185 |
| slI1325 | slr2076 | slI0899 | slr1280 | slI1615 | slr1986 | slI0569 | smr0006 | slr1185 | slr1703 |
| slI0416 | slI1325 | slr1280 | slr1756 | slI0202 | slr1986 | slI1277 | smr0006 | slI0078 | slr1185 |
| slI1325 | slr0156 | slI1085 | slr1280 | slr0902 | slr1986 | slI1110 | smr0006 | slr0557 | slr1185 |
| slI1325 | slr1641 | slI1931 | slr1280 | slI1144 | slr1986 | slI1865 | smr0006 | slr1185 | slr1884 |
| slI1325 | slr0542 | slI0083 | slr1280 | slr0017 | slr1986 | slr1228 | smr0006 | slr1031 | slr1185 |
| slI0534 | slI1325 | slr1280 | slr1755 | slr1424 | slr1986 | slr0808 | smr0006 | slr1185 | slr1793 |
| slI1325 | slr0165 | slI0057 | slr1280 | slr1423 | slr1986 | slr0082 | smr0006 | slr0633 | slr1185 |
| slI0030 | slI1325 | slI0017 | slr1280 | slI2010 | slr1986 | slr0742 | smr0006 | slr1185 | slr1278 |
| slI1325 | slr0847 | slI1185 | slr1280 | slr0528 | slr1986 | slI0098 | smr0006 | slr0783 | slr1185 |
| slI1325 | slr0553 | slr0839 | slr1280 | slr1351 | slr1986 | slr1646 | smr0006 | slI1198 | slr1185 |
| slI1325 | slr0812 | slI1876 | slr1280 | slI0622 | slr1986 | slr1130 | smr0006 | slI0204 | slr1185 |
| slI1325 | slr1347 | slI0900 | slr1280 | slI0631 | slr1986 | slr0080 | smr0006 | slI1750 | slr1185 |
| slI1325 | slr1348 | slr0608 | slr1280 | slr0787 | slr1986 | slr0551 | smr0006 | slI0420 | slr1185 |
| slI1325 | slr1791 | slr0652 | slr1280 | slI1852 | slr1986 | slI0145 | smr0006 | slr1185 | slr1256 |
| slI0594 | slI1325 | slr0084 | slr1280 | slr1090 | slr1986 | slI0708 | smr0006 | slI1639 | slr1185 |
| slI1325 | slr0550 | slI1893 | slr1280 | slI0902 | slr1986 | slr0679 | smr0006 | slr1185 | slr1899 |
| slI1058 | slI1325 | slr0500 | slr1280 | slr0661 | slr1986 | slr0722 | smr0006 | slI0643 | slr1185 |
| slI1325 | slr1665 | slr1280 | slr1560 | slr0526 | slr1986 | slr0072 | smr0006 | slr1185 | slr1844 |
| slI1325 | slr0536 | slI1988 | slr1280 | slI1249 | slr1986 | slI1547 | smr0006 | slI0459 | slr1185 |
| slI1325 | slr1874 | slr1280 | slr1289 | slI0892 | slr1986 | slI1234 | smr0006 | slI0865 | slr1185 |

|         |         |         |         |         |         |         |         |         |         |
|---------|---------|---------|---------|---------|---------|---------|---------|---------|---------|
| sll1325 | sll1776 | sll1556 | slr1280 | sll0660 | slr1986 | sll0616 | smr0006 | slr0733 | slr1185 |
| sll0848 | sll1325 | slr1280 | ssl3441 | slr1779 | slr1986 | slr2073 | smr0006 | sll1459 | slr1185 |
| sll0897 | sll1325 | slr0744 | slr1280 | slr0394 | slr1986 | slr1639 | smr0006 | sll0905 | slr1185 |
| sll1325 | sll1933 | slr0974 | slr1280 | slr1986 | slr2047 | sll1108 | smr0006 | sll0402 | sll1316 |
| sll1325 | slr0965 | slr1280 | slr1622 | slr0741 | slr1986 | sll0362 | smr0006 | sll0728 | sll1316 |
| sll1325 | slr1463 | sll1196 | slr1280 | slr1510 | slr1986 | slr0958 | smr0006 | sll0336 | sll1316 |
| sll1098 | sll1325 | sll0745 | slr1280 | sll1043 | slr1986 | slr1720 | smr0006 | sll1299 | sll1316 |
| sll1325 | slr0434 | sll1815 | slr1280 | slr0400 | slr1986 | sll0179 | smr0006 | sll1316 | ssl2084 |
| sll1261 | sll1325 | sll1059 | slr1280 | sll1415 | slr1986 | sll0454 | smr0006 | sll1316 | sll2001 |
| sll1099 | sll1325 | slr1123 | slr1280 | sll1909 | slr1986 | sll1553 | smr0006 | sll1316 | sll1430 |
| sll1325 | slr0752 | sll1760 | slr1280 | sll0373 | slr1986 | slr0638 | smr0006 | sll0573 | sll1316 |
| sll1325 | slr0952 | sll0469 | slr1280 | slr1986 | slr2035 | slr0220 | smr0006 | sll1316 | slr1898 |
| sll1325 | slr1511 | slr1280 | slr1517 | slr1986 | slr2132 | slr0357 | smr0006 | sll0080 | sll1316 |
| sll1325 | sll1605 | sll0869 | slr1280 | slr0922 | slr1986 | sll1362 | smr0006 | sll1316 | slr1022 |
| sll0990 | sll1325 | slr1280 | slr1598 | slr0838 | slr1986 | slr1550 | smr0006 | sll1316 | sll1883 |
| sll1325 | sll1633 | sll0868 | slr1280 | sll1823 | slr1986 | sll1074 | smr0006 | sll1316 | slr1133 |
| sll1325 | slr0018 | slr0994 | slr1280 | sll1056 | slr1986 | slr0649 | smr0006 | sll1316 | slr0444 |
| sll0567 | sll1325 | sll0379 | slr1280 | slr0520 | slr1986 | sll0495 | smr0006 | sll1316 | slr2130 |
| sll1325 | slr0884 | sll1676 | slr1280 | sll0144 | slr1986 | sll1425 | smr0006 | sll1316 | sll1669 |
| sll1325 | sll1342 | sll0927 | slr1280 | sll0467 | slr1986 | sll0502 | smr0006 | sll1316 | slr0585 |
| sll1325 | slr1349 | sll0996 | slr1280 | slr0711 | slr1986 | slr1703 | smr0006 | sll1316 | slr2075 |
| sll0593 | sll1325 | sll0844 | slr1280 | sll0754 | slr1986 | sll0078 | smr0006 | sll1316 | slr2076 |
| sll0220 | sll1325 | sll1615 | slr1280 | sll0569 | slr1986 | slr0557 | smr0006 | sll0416 | sll1316 |
| sll0899 | sll1325 | sll0202 | slr1280 | sll1277 | slr1986 | slr1884 | smr0006 | sll1316 | slr0156 |
| sll1325 | slr1756 | slr0902 | slr1280 | sll1110 | slr1986 | slr1031 | smr0006 | sll1316 | slr1641 |
| sll1085 | sll1325 | sll1144 | slr1280 | sll1865 | slr1986 | slr1793 | smr0006 | sll1316 | slr0542 |
| sll1325 | sll1931 | slr0017 | slr1280 | slr1228 | slr1986 | slr0633 | smr0006 | sll0534 | sll1316 |
| sll0083 | sll1325 | slr1280 | slr1424 | slr0808 | slr1986 | slr1278 | smr0006 | sll1316 | slr0165 |
| sll1325 | slr1755 | slr1280 | slr1423 | slr0082 | slr1986 | slr0783 | smr0006 | sll0030 | sll1316 |
| sll0057 | sll1325 | sll2010 | slr1280 | slr0742 | slr1986 | sll1198 | smr0006 | sll1316 | slr0847 |
| sll0017 | sll1325 | slr0528 | slr1280 | sll0098 | slr1986 | sll0204 | smr0006 | sll1316 | slr0553 |
| sll1185 | sll1325 | slr1280 | slr1351 | slr1646 | slr1986 | sll1750 | smr0006 | sll1316 | slr0812 |
| sll1325 | slr0839 | sll0622 | slr1280 | slr1130 | slr1986 | sll0420 | smr0006 | sll1316 | slr1347 |
| sll1325 | sll1876 | sll0631 | slr1280 | slr0080 | slr1986 | slr1256 | smr0006 | sll1316 | slr1348 |
| sll0900 | sll1325 | slr0787 | slr1280 | slr0551 | slr1986 | sll1639 | smr0006 | sll1316 | slr1791 |
| sll1325 | slr0608 | sll1852 | slr1280 | sll0145 | slr1986 | slr1899 | smr0006 | sll0594 | sll1316 |
| sll1325 | slr0652 | slr1090 | slr1280 | sll0708 | slr1986 | sll0643 | smr0006 | sll1316 | slr0550 |
| sll1325 | slr0084 | sll0902 | slr1280 | slr0679 | slr1986 | slr1844 | smr0006 | sll1058 | sll1316 |
| sll1325 | sll1893 | slr0661 | slr1280 | slr0722 | slr1986 | sll0459 | smr0006 | sll1316 | slr1665 |
| sll1325 | slr0500 | slr0526 | slr1280 | slr0072 | slr1986 | sll0865 | smr0006 | sll1316 | slr0536 |
| sll1325 | slr1560 | sll1249 | slr1280 | sll1547 | slr1986 | slr0733 | smr0006 | sll1316 | slr1874 |
| sll1325 | sll1988 | sll0892 | slr1280 | sll1234 | slr1986 | sll1459 | smr0006 | sll1316 | sll1776 |
| sll1325 | slr1289 | sll0660 | slr1280 | sll0616 | slr1986 | sll0905 | smr0006 | sll0848 | sll1316 |
| sll1325 | sll1556 | slr1280 | slr1779 | slr1986 | slr2073 | sll0402 | ssl2598 | sll0897 | sll1316 |
| sll1325 | ssl3441 | slr0394 | slr1280 | slr1639 | slr1986 | sll0728 | ssl2598 | sll1316 | sll1933 |
| sll1325 | slr0744 | slr1280 | slr2047 | sll1108 | slr1986 | sll0336 | ssl2598 | sll1316 | slr0965 |
| sll1325 | slr0974 | slr0741 | slr1280 | sll0362 | slr1986 | sll1299 | ssl2598 | sll1316 | slr1463 |
| sll1325 | slr1622 | slr1280 | slr1510 | slr0958 | slr1986 | ssl2084 | ssl2598 | sll1098 | sll1316 |
| sll1196 | sll1325 | sll1043 | slr1280 | slr1720 | slr1986 | sll2001 | ssl2598 | sll1316 | slr0434 |
| sll0745 | sll1325 | slr0400 | slr1280 | sll0179 | slr1986 | sll1430 | ssl2598 | sll1261 | sll1316 |
| sll1325 | sll1815 | sll1415 | slr1280 | sll0454 | slr1986 | sll0573 | ssl2598 | sll1099 | sll1316 |

|         |         |         |         |         |         |         |         |         |         |
|---------|---------|---------|---------|---------|---------|---------|---------|---------|---------|
| sll1059 | sll1325 | sll1909 | slr1280 | sll1553 | slr1986 | slr1898 | ssl2598 | sll1316 | slr0752 |
| sll1325 | slr1123 | sll0373 | slr1280 | slr0638 | slr1986 | sll0080 | ssl2598 | sll1316 | slr0952 |
| sll1325 | sll1760 | slr1280 | slr2035 | slr0220 | slr1986 | slr1022 | ssl2598 | sll1316 | slr1511 |
| sll0469 | sll1325 | slr1280 | slr2132 | slr0357 | slr1986 | sll1883 | ssl2598 | sll1316 | sll1605 |
| sll1325 | slr1517 | slr0922 | slr1280 | sll1362 | slr1986 | slr1133 | ssl2598 | sll0990 | sll1316 |
| sll0869 | sll1325 | slr0838 | slr1280 | slr1550 | slr1986 | slr0444 | ssl2598 | sll1316 | sll1633 |
| sll1325 | slr1598 | sll1823 | slr1280 | sll1074 | slr1986 | slr2130 | ssl2598 | sll1316 | slr0018 |
| sll0868 | sll1325 | sll1056 | slr1280 | slr0649 | slr1986 | sll1669 | ssl2598 | sll0567 | sll1316 |
| sll1325 | slr0994 | slr0520 | slr1280 | sll0495 | slr1986 | slr0585 | ssl2598 | sll1316 | slr0884 |
| sll0379 | sll1325 | sll0144 | slr1280 | sll1425 | slr1986 | slr2075 | ssl2598 | sll1316 | sll1342 |
| sll1325 | sll1676 | sll0467 | slr1280 | sll0502 | slr1986 | slr2076 | ssl2598 | sll1316 | slr1349 |
| sll0927 | sll1325 | slr0711 | slr1280 | slr1703 | slr1986 | sll0416 | ssl2598 | sll0593 | sll1316 |
| sll0996 | sll1325 | sll0754 | slr1280 | sll0078 | slr1986 | slr0156 | ssl2598 | sll0220 | sll1316 |
| sll0844 | sll1325 | sll0569 | slr1280 | slr0557 | slr1986 | slr1641 | ssl2598 | sll0899 | sll1316 |
| sll1325 | sll1615 | sll1277 | slr1280 | slr1884 | slr1986 | slr0542 | ssl2598 | sll1316 | slr1756 |
| sll0202 | sll1325 | sll1110 | slr1280 | slr1031 | slr1986 | sll0534 | ssl2598 | sll1085 | sll1316 |
| sll1325 | slr0902 | sll1865 | slr1280 | slr1793 | slr1986 | slr0165 | ssl2598 | sll1316 | sll1931 |
| sll1144 | sll1325 | slr1228 | slr1280 | slr0633 | slr1986 | sll0030 | ssl2598 | sll0083 | sll1316 |
| sll1325 | slr0017 | slr0808 | slr1280 | slr1278 | slr1986 | slr0847 | ssl2598 | sll1316 | slr1755 |
| sll1325 | slr1424 | slr0082 | slr1280 | slr0783 | slr1986 | slr0553 | ssl2598 | sll0057 | sll1316 |
| sll1325 | slr1423 | slr0742 | slr1280 | sll1198 | slr1986 | slr0812 | ssl2598 | sll0017 | sll1316 |
| sll1325 | sll2010 | sll0098 | slr1280 | sll0204 | slr1986 | slr1347 | ssl2598 | sll1185 | sll1316 |
| sll1325 | slr0528 | slr1280 | slr1646 | sll1750 | slr1986 | slr1348 | ssl2598 | sll1316 | slr0839 |
| sll1325 | slr1351 | slr1130 | slr1280 | sll0420 | slr1986 | slr1791 | ssl2598 | sll1316 | sll1876 |
| sll0622 | sll1325 | slr0080 | slr1280 | slr1256 | slr1986 | sll0594 | ssl2598 | sll0900 | sll1316 |
| sll0631 | sll1325 | slr0551 | slr1280 | sll1639 | slr1986 | slr0550 | ssl2598 | sll1316 | slr0608 |
| sll1325 | slr0787 | sll0145 | slr1280 | slr1899 | slr1986 | sll1058 | ssl2598 | sll1316 | slr0652 |
| sll1325 | sll1852 | sll0708 | slr1280 | sll0643 | slr1986 | slr1665 | ssl2598 | sll1316 | slr0084 |
| sll1325 | slr1090 | slr0679 | slr1280 | slr1844 | slr1986 | slr0536 | ssl2598 | sll1316 | sll1893 |
| sll0902 | sll1325 | slr0722 | slr1280 | sll0459 | slr1986 | slr1874 | ssl2598 | sll1316 | slr0500 |
| sll1325 | slr0661 | slr0072 | slr1280 | sll0865 | slr1986 | sll1776 | ssl2598 | sll1316 | slr1560 |
| sll1325 | slr0526 | sll1547 | slr1280 | slr0733 | slr1986 | sll0848 | ssl2598 | sll1316 | sll1988 |
| sll1249 | sll1325 | sll1234 | slr1280 | sll1459 | slr1986 | sll0897 | ssl2598 | sll1316 | slr1289 |
| sll0892 | sll1325 | sll0616 | slr1280 | sll0905 | slr1986 | sll1933 | ssl2598 | sll1316 | sll1556 |
| sll0660 | sll1325 | slr1280 | slr2073 | sll0402 | sll1578 | slr0965 | ssl2598 | sll1316 | ssl3441 |
| sll1325 | slr1779 | slr1280 | slr1639 | sll0728 | sll1578 | slr1463 | ssl2598 | sll1316 | slr0744 |
| sll1325 | slr0394 | sll1108 | slr1280 | sll0336 | sll1578 | sll1098 | ssl2598 | sll1316 | slr0974 |
| sll1325 | slr2047 | sll0362 | slr1280 | sll1299 | sll1578 | slr0434 | ssl2598 | sll1316 | slr1622 |
| sll1325 | slr0741 | slr0958 | slr1280 | sll1578 | ssl2084 | sll1261 | ssl2598 | sll1196 | sll1316 |
| sll1325 | slr1510 | slr1280 | slr1720 | sll1578 | sll2001 | sll1099 | ssl2598 | sll0745 | sll1316 |
| sll1043 | sll1325 | sll0179 | slr1280 | sll1430 | sll1578 | slr0752 | ssl2598 | sll1316 | sll1815 |
| sll1325 | slr0400 | sll0454 | slr1280 | sll0573 | sll1578 | slr0952 | ssl2598 | sll1059 | sll1316 |
| sll1325 | sll1415 | sll1553 | slr1280 | sll1578 | slr1898 | slr1511 | ssl2598 | sll1316 | slr1123 |
| sll1325 | sll1909 | slr0638 | slr1280 | sll0080 | sll1578 | sll1605 | ssl2598 | sll1316 | sll1760 |
| sll0373 | sll1325 | slr0220 | slr1280 | sll1578 | slr1022 | sll0990 | ssl2598 | sll0469 | sll1316 |
| sll1325 | slr2035 | slr0357 | slr1280 | sll1578 | sll1883 | sll1633 | ssl2598 | sll1316 | slr1517 |
| sll1325 | slr2132 | sll1362 | slr1280 | sll1578 | slr1133 | slr0018 | ssl2598 | sll0869 | sll1316 |
| sll1325 | slr0922 | slr1280 | slr1550 | sll1578 | slr0444 | sll0567 | ssl2598 | sll1316 | slr1598 |
| sll1325 | slr0838 | sll1074 | slr1280 | sll1578 | slr2130 | slr0884 | ssl2598 | sll0868 | sll1316 |
| sll1325 | sll1823 | slr0649 | slr1280 | sll1578 | sll1669 | sll1342 | ssl2598 | sll1316 | slr0994 |
| sll1056 | sll1325 | sll0495 | slr1280 | sll1578 | slr0585 | slr1349 | ssl2598 | sll0379 | sll1316 |



|         |         |         |         |         |         |         |         |         |         |
|---------|---------|---------|---------|---------|---------|---------|---------|---------|---------|
| sll1325 | slr0520 | sll1425 | slr1280 | sll1578 | slr2075 | sll0593 | ssl2598 | sll1316 | sll1676 |
| sll0144 | sll1325 | sll0502 | slr1280 | sll1578 | slr2076 | sll0220 | ssl2598 | sll0927 | sll1316 |
| sll0467 | sll1325 | slr1280 | slr1703 | sll0416 | sll1578 | sll0899 | ssl2598 | sll0996 | sll1316 |
| sll1325 | slr0711 | sll0078 | slr1280 | sll1578 | slr0156 | slr1756 | ssl2598 | sll0844 | sll1316 |
| sll0754 | sll1325 | slr0557 | slr1280 | sll1578 | slr1641 | sll1085 | ssl2598 | sll1316 | sll1615 |
| sll0569 | sll1325 | slr1280 | slr1884 | sll1578 | slr0542 | sll1931 | ssl2598 | sll0202 | sll1316 |
| sll1277 | sll1325 | slr1031 | slr1280 | sll0534 | sll1578 | sll0083 | ssl2598 | sll1316 | slr0902 |
| sll1110 | sll1325 | slr1280 | slr1793 | sll1578 | slr0165 | slr1755 | ssl2598 | sll1144 | sll1316 |
| sll1325 | sll1865 | slr0633 | slr1280 | sll0030 | sll1578 | sll0057 | ssl2598 | sll1316 | slr0017 |
| sll1325 | slr1228 | slr1278 | slr1280 | sll1578 | slr0847 | sll0017 | ssl2598 | sll1316 | slr1424 |
| sll1325 | slr0808 | slr0783 | slr1280 | sll1578 | slr0553 | sll1185 | ssl2598 | sll1316 | slr1423 |
| sll1325 | slr0082 | sll1198 | slr1280 | sll1578 | slr0812 | slr0839 | ssl2598 | sll1316 | sll2010 |
| sll1325 | slr0742 | sll0204 | slr1280 | sll1578 | slr1347 | sll1876 | ssl2598 | sll1316 | slr0528 |
| sll0098 | sll1325 | sll1750 | slr1280 | sll1578 | slr1348 | sll0900 | ssl2598 | sll1316 | slr1351 |
| sll1325 | slr1646 | sll0420 | slr1280 | sll1578 | slr1791 | slr0608 | ssl2598 | sll0622 | sll1316 |
| sll1325 | slr1130 | slr1256 | slr1280 | sll0594 | sll1578 | slr0652 | ssl2598 | sll0631 | sll1316 |
| sll1325 | slr0080 | sll1639 | slr1280 | sll1578 | slr0550 | slr0084 | ssl2598 | sll1316 | slr0787 |
| sll1325 | slr0551 | slr1280 | slr1899 | sll1058 | sll1578 | sll1893 | ssl2598 | sll1316 | sll1852 |
| sll0145 | sll1325 | sll0643 | slr1280 | sll1578 | slr1665 | slr0500 | ssl2598 | sll1316 | slr1090 |
| sll0708 | sll1325 | slr1280 | slr1844 | sll1578 | slr0536 | slr1560 | ssl2598 | sll0902 | sll1316 |
| sll1325 | slr0679 | sll0459 | slr1280 | sll1578 | slr1874 | sll1988 | ssl2598 | sll1316 | slr0661 |
| sll1325 | slr0722 | sll0865 | slr1280 | sll1578 | sll1776 | slr1289 | ssl2598 | sll1316 | slr0526 |
| sll1325 | slr0072 | slr0733 | slr1280 | sll0848 | sll1578 | sll1556 | ssl2598 | sll1249 | sll1316 |
| sll1325 | sll1547 | sll1459 | slr1280 | sll0897 | sll1578 | ssl2598 | ssl3441 | sll0892 | sll1316 |
| sll1234 | sll1325 | sll0905 | slr1280 | sll1578 | sll1933 | slr0744 | ssl2598 | sll0660 | sll1316 |
| sll0616 | sll1325 | ndhK2   | sll0402 | sll1578 | slr0965 | slr0974 | ssl2598 | sll1316 | slr1779 |
| sll1325 | slr2073 | ndhK2   | sll0728 | sll1578 | slr1463 | slr1622 | ssl2598 | sll1316 | slr0394 |
| sll1325 | slr1639 | ndhK2   | sll0336 | sll1098 | sll1578 | sll1196 | ssl2598 | sll1316 | slr2047 |
| sll1108 | sll1325 | ndhK2   | sll1299 | sll1578 | slr0434 | sll0745 | ssl2598 | sll1316 | slr0741 |
| sll0362 | sll1325 | ndhK2   | ssl2084 | sll1261 | sll1578 | sll1815 | ssl2598 | sll1316 | slr1510 |
| sll1325 | slr0958 | ndhK2   | sll2001 | sll1099 | sll1578 | sll1059 | ssl2598 | sll1043 | sll1316 |
| sll1325 | slr1720 | ndhK2   | sll1430 | sll1578 | slr0752 | slr1123 | ssl2598 | sll1316 | slr0400 |
| sll0179 | sll1325 | ndhK2   | sll0573 | sll1578 | slr0952 | sll1760 | ssl2598 | sll1316 | sll1415 |
| sll0454 | sll1325 | ndhK2   | slr1898 | sll1578 | slr1511 | sll0469 | ssl2598 | sll1316 | sll1909 |
| sll1325 | sll1553 | ndhK2   | sll0080 | sll1578 | sll1605 | slr1517 | ssl2598 | sll0373 | sll1316 |
| sll1325 | slr0638 | ndhK2   | slr1022 | sll0990 | sll1578 | sll0869 | ssl2598 | sll1316 | slr2035 |
| sll1325 | slr0220 | ndhK2   | sll1883 | sll1578 | sll1633 | slr1598 | ssl2598 | sll1316 | slr2132 |
| sll1325 | slr0357 | ndhK2   | slr1133 | sll1578 | slr0018 | sll0868 | ssl2598 | sll1316 | slr0922 |
| sll1325 | sll1362 | ndhK2   | slr0444 | sll0567 | sll1578 | slr0994 | ssl2598 | sll1316 | slr0838 |
| sll1325 | slr1550 | ndhK2   | slr2130 | sll1578 | slr0884 | sll0379 | ssl2598 | sll1316 | sll1823 |
| sll1074 | sll1325 | ndhK2   | sll1669 | sll1342 | sll1578 | sll1676 | ssl2598 | sll1056 | sll1316 |
| sll1325 | slr0649 | ndhK2   | slr0585 | sll1578 | slr1349 | sll0927 | ssl2598 | sll1316 | slr0520 |
| sll0495 | sll1325 | ndhK2   | slr2075 | sll0593 | sll1578 | sll0996 | ssl2598 | sll0144 | sll1316 |
| sll1325 | sll1425 | ndhK2   | slr2076 | sll0220 | sll1578 | sll0844 | ssl2598 | sll0467 | sll1316 |
| sll0502 | sll1325 | ndhK2   | sll0416 | sll0899 | sll1578 | sll1615 | ssl2598 | sll1316 | slr0711 |
| sll1325 | slr1703 | ndhK2   | slr0156 | sll1578 | slr1756 | sll0202 | ssl2598 | sll0754 | sll1316 |
| sll0078 | sll1325 | ndhK2   | slr1641 | sll1085 | sll1578 | slr0902 | ssl2598 | sll0569 | sll1316 |
| sll1325 | slr0557 | ndhK2   | slr0542 | sll1578 | sll1931 | sll1144 | ssl2598 | sll1277 | sll1316 |
| sll1325 | slr1884 | ndhK2   | sll0534 | sll0083 | sll1578 | slr0017 | ssl2598 | sll1110 | sll1316 |
| sll1325 | slr1031 | ndhK2   | slr0165 | sll1578 | slr1755 | slr1424 | ssl2598 | sll1316 | sll1865 |
| sll1325 | slr1793 | ndhK2   | sll0030 | sll0057 | sll1578 | slr1423 | ssl2598 | sll1316 | slr1228 |

|         |         |       |         |         |         |         |         |         |         |
|---------|---------|-------|---------|---------|---------|---------|---------|---------|---------|
| sll1325 | slr0633 | ndhK2 | slr0847 | sll0017 | sll1578 | sll2010 | ssl2598 | sll1316 | slr0808 |
| sll1325 | slr1278 | ndhK2 | slr0553 | sll1185 | sll1578 | slr0528 | ssl2598 | sll1316 | slr0082 |
| sll1325 | slr0783 | ndhK2 | slr0812 | sll1578 | slr0839 | slr1351 | ssl2598 | sll1316 | slr0742 |
| sll1198 | sll1325 | ndhK2 | slr1347 | sll1578 | sll1876 | sll0622 | ssl2598 | sll0098 | sll1316 |
| sll0204 | sll1325 | ndhK2 | slr1348 | sll0900 | sll1578 | sll0631 | ssl2598 | sll1316 | slr1646 |
| sll1325 | sll1750 | ndhK2 | slr1791 | sll1578 | slr0608 | slr0787 | ssl2598 | sll1316 | slr1130 |
| sll0420 | sll1325 | ndhK2 | sll0594 | sll1578 | slr0652 | sll1852 | ssl2598 | sll1316 | slr0080 |
| sll1325 | slr1256 | ndhK2 | slr0550 | sll1578 | slr0084 | slr1090 | ssl2598 | sll1316 | slr0551 |
| sll1325 | sll1639 | ndhK2 | sll1058 | sll1578 | sll1893 | sll0902 | ssl2598 | sll0145 | sll1316 |
| sll1325 | slr1899 | ndhK2 | slr1665 | sll1578 | slr0500 | slr0661 | ssl2598 | sll0708 | sll1316 |
| sll0643 | sll1325 | ndhK2 | slr0536 | sll1578 | slr1560 | slr0526 | ssl2598 | sll1316 | slr0679 |
| sll1325 | slr1844 | ndhK2 | slr1874 | sll1578 | sll1988 | sll1249 | ssl2598 | sll1316 | slr0722 |
| sll0459 | sll1325 | ndhK2 | sll1776 | sll1578 | slr1289 | sll0892 | ssl2598 | sll1316 | slr0072 |
| sll0865 | sll1325 | ndhK2 | sll0848 | sll1556 | sll1578 | sll0660 | ssl2598 | sll1316 | sll1547 |
| sll1325 | slr0733 | ndhK2 | sll0897 | sll1578 | ssl3441 | slr1779 | ssl2598 | sll1234 | sll1316 |
| sll1325 | sll1459 | ndhK2 | sll1933 | sll1578 | slr0744 | slr0394 | ssl2598 | sll0616 | sll1316 |
| sll0905 | sll1325 | ndhK2 | slr0965 | sll1578 | slr0974 | slr2047 | ssl2598 | sll1316 | slr2073 |
| sll0402 | slr1330 | ndhK2 | slr1463 | sll1578 | slr1622 | slr0741 | ssl2598 | sll1316 | slr1639 |
| sll0728 | slr1330 | ndhK2 | sll1098 | sll1196 | sll1578 | slr1510 | ssl2598 | sll1108 | sll1316 |
| sll0336 | slr1330 | ndhK2 | slr0434 | sll0745 | sll1578 | sll1043 | ssl2598 | sll0362 | sll1316 |
| sll1299 | slr1330 | ndhK2 | sll1261 | sll1578 | sll1815 | slr0400 | ssl2598 | sll1316 | slr0958 |
| slr1330 | ssl2084 | ndhK2 | sll1099 | sll1059 | sll1578 | sll1415 | ssl2598 | sll1316 | slr1720 |
| sll2001 | slr1330 | ndhK2 | slr0752 | sll1578 | slr1123 | sll1909 | ssl2598 | sll0179 | sll1316 |
| sll1430 | slr1330 | ndhK2 | slr0952 | sll1578 | sll1760 | sll0373 | ssl2598 | sll0454 | sll1316 |
| sll0573 | slr1330 | ndhK2 | slr1511 | sll0469 | sll1578 | slr2035 | ssl2598 | sll1316 | sll1553 |
| slr1330 | slr1898 | ndhK2 | sll1605 | sll1578 | slr1517 | slr2132 | ssl2598 | sll1316 | slr0638 |
| sll0080 | slr1330 | ndhK2 | sll0990 | sll0869 | sll1578 | slr0922 | ssl2598 | sll1316 | slr0220 |
| slr1022 | slr1330 | ndhK2 | sll1633 | sll1578 | slr1598 | slr0838 | ssl2598 | sll1316 | slr0357 |
| sll1883 | slr1330 | ndhK2 | slr0018 | sll0868 | sll1578 | sll1823 | ssl2598 | sll1316 | sll1362 |
| slr1133 | slr1330 | ndhK2 | sll0567 | sll1578 | slr0994 | sll1056 | ssl2598 | sll1316 | slr1550 |
| slr0444 | slr1330 | ndhK2 | slr0884 | sll0379 | sll1578 | slr0520 | ssl2598 | sll1074 | sll1316 |
| slr1330 | slr2130 | ndhK2 | sll1342 | sll1578 | sll1676 | sll0144 | ssl2598 | sll1316 | slr0649 |
| sll1669 | slr1330 | ndhK2 | slr1349 | sll0927 | sll1578 | sll0467 | ssl2598 | sll0495 | sll1316 |
| slr0585 | slr1330 | ndhK2 | sll0593 | sll0996 | sll1578 | slr0711 | ssl2598 | sll1316 | sll1425 |
| slr1330 | slr2075 | ndhK2 | sll0220 | sll0844 | sll1578 | sll0754 | ssl2598 | sll0502 | sll1316 |
| slr1330 | slr2076 | ndhK2 | sll0899 | sll1578 | sll1615 | sll0569 | ssl2598 | sll1316 | slr1703 |
| sll0416 | slr1330 | ndhK2 | slr1756 | sll0202 | sll1578 | sll1277 | ssl2598 | sll0078 | sll1316 |
| slr0156 | slr1330 | ndhK2 | sll1085 | sll1578 | slr0902 | sll1110 | ssl2598 | sll1316 | slr0557 |
| slr1330 | slr1641 | ndhK2 | sll1931 | sll1144 | sll1578 | sll1865 | ssl2598 | sll1316 | slr1884 |
| slr0542 | slr1330 | ndhK2 | sll0083 | sll1578 | slr0017 | slr1228 | ssl2598 | sll1316 | slr1031 |
| sll0534 | slr1330 | ndhK2 | slr1755 | sll1578 | slr1424 | slr0808 | ssl2598 | sll1316 | slr1793 |
| slr0165 | slr1330 | ndhK2 | sll0057 | sll1578 | slr1423 | slr0082 | ssl2598 | sll1316 | slr0633 |
| sll0030 | slr1330 | ndhK2 | sll0017 | sll1578 | sll2010 | slr0742 | ssl2598 | sll1316 | slr1278 |
| slr0847 | slr1330 | ndhK2 | sll1185 | sll1578 | slr0528 | sll0098 | ssl2598 | sll1316 | slr0783 |
| slr0553 | slr1330 | ndhK2 | slr0839 | sll1578 | slr1351 | slr1646 | ssl2598 | sll1198 | sll1316 |
| slr0812 | slr1330 | ndhK2 | sll1876 | sll0622 | sll1578 | slr1130 | ssl2598 | sll0204 | sll1316 |
| slr1330 | slr1347 | ndhK2 | sll0900 | sll0631 | sll1578 | slr0080 | ssl2598 | sll1316 | sll1750 |
| slr1330 | slr1348 | ndhK2 | slr0608 | sll1578 | slr0787 | slr0551 | ssl2598 | sll0420 | sll1316 |
| slr1330 | slr1791 | ndhK2 | slr0652 | sll1578 | sll1852 | sll0145 | ssl2598 | sll1316 | slr1256 |
| sll0594 | slr1330 | ndhK2 | slr0084 | sll1578 | slr1090 | sll0708 | ssl2598 | sll1316 | sll1639 |
| slr0550 | slr1330 | ndhK2 | sll1893 | sll0902 | sll1578 | slr0679 | ssl2598 | sll1316 | slr1899 |

|         |         |       |         |         |         |         |         |         |         |
|---------|---------|-------|---------|---------|---------|---------|---------|---------|---------|
| sll1058 | slr1330 | ndhK2 | slr0500 | sll1578 | slr0661 | slr0722 | ssl2598 | sll0643 | sll1316 |
| slr1330 | slr1665 | ndhK2 | slr1560 | sll1578 | slr0526 | slr0072 | ssl2598 | sll1316 | slr1844 |
| slr0536 | slr1330 | ndhK2 | sll1988 | sll1249 | sll1578 | sll1547 | ssl2598 | sll0459 | sll1316 |
| slr1330 | slr1874 | ndhK2 | slr1289 | sll0892 | sll1578 | sll1234 | ssl2598 | sll0865 | sll1316 |
| sll1776 | slr1330 | ndhK2 | sll1556 | sll0660 | sll1578 | sll0616 | ssl2598 | sll1316 | slr0733 |
| sll0848 | slr1330 | ndhK2 | ssl3441 | sll1578 | slr1779 | slr2073 | ssl2598 | sll1316 | sll1459 |
| sll0897 | slr1330 | ndhK2 | slr0744 | sll1578 | slr0394 | slr1639 | ssl2598 | sll0905 | sll1316 |
| sll1933 | slr1330 | ndhK2 | slr0974 | sll1578 | slr2047 | sll1108 | ssl2598 | sll0402 | slr1513 |
| slr0965 | slr1330 | ndhK2 | slr1622 | sll1578 | slr0741 | sll0362 | ssl2598 | sll0728 | slr1513 |
| slr1330 | slr1463 | ndhK2 | sll1196 | sll1578 | slr1510 | slr0958 | ssl2598 | sll0336 | slr1513 |
| sll1098 | slr1330 | ndhK2 | sll0745 | sll1043 | sll1578 | slr1720 | ssl2598 | sll1299 | slr1513 |
| slr0434 | slr1330 | ndhK2 | sll1815 | sll1578 | slr0400 | sll0179 | ssl2598 | slr1513 | ssl2084 |
| sll1261 | slr1330 | ndhK2 | sll1059 | sll1415 | sll1578 | sll0454 | ssl2598 | sll2001 | slr1513 |
| sll1099 | slr1330 | ndhK2 | slr1123 | sll1578 | sll1909 | sll1553 | ssl2598 | sll1430 | slr1513 |
| slr0752 | slr1330 | ndhK2 | sll1760 | sll0373 | sll1578 | slr0638 | ssl2598 | sll0573 | slr1513 |
| slr0952 | slr1330 | ndhK2 | sll0469 | sll1578 | slr2035 | slr0220 | ssl2598 | slr1513 | slr1898 |
| slr1330 | slr1511 | ndhK2 | slr1517 | sll1578 | slr2132 | slr0357 | ssl2598 | sll0080 | slr1513 |
| sll1605 | slr1330 | ndhK2 | sll0869 | sll1578 | slr0922 | sll1362 | ssl2598 | slr1022 | slr1513 |
| sll0990 | slr1330 | ndhK2 | slr1598 | sll1578 | slr0838 | slr1550 | ssl2598 | sll1883 | slr1513 |
| sll1633 | slr1330 | ndhK2 | sll0868 | sll1578 | sll1823 | sll1074 | ssl2598 | slr1133 | slr1513 |
| slr0018 | slr1330 | ndhK2 | slr0994 | sll1056 | sll1578 | slr0649 | ssl2598 | slr0444 | slr1513 |
| sll0567 | slr1330 | ndhK2 | sll0379 | sll1578 | slr0520 | sll0495 | ssl2598 | slr1513 | slr2130 |
| slr0884 | slr1330 | ndhK2 | sll1676 | sll0144 | sll1578 | sll1425 | ssl2598 | sll1669 | slr1513 |
| sll1342 | slr1330 | ndhK2 | sll0927 | sll0467 | sll1578 | sll0502 | ssl2598 | slr0585 | slr1513 |
| slr1330 | slr1349 | ndhK2 | sll0996 | sll1578 | slr0711 | slr1703 | ssl2598 | slr1513 | slr2075 |
| sll0593 | slr1330 | ndhK2 | sll0844 | sll0754 | sll1578 | sll0078 | ssl2598 | slr1513 | slr2076 |
| sll0220 | slr1330 | ndhK2 | sll1615 | sll0569 | sll1578 | slr0557 | ssl2598 | sll0416 | slr1513 |
| sll0899 | slr1330 | ndhK2 | sll0202 | sll1277 | sll1578 | slr1884 | ssl2598 | slr0156 | slr1513 |
| slr1330 | slr1756 | ndhK2 | slr0902 | sll1110 | sll1578 | slr1031 | ssl2598 | slr1513 | slr1641 |
| sll1085 | slr1330 | ndhK2 | sll1144 | sll1578 | sll1865 | slr1793 | ssl2598 | slr0542 | slr1513 |
| sll1931 | slr1330 | ndhK2 | slr0017 | sll1578 | slr1228 | slr0633 | ssl2598 | sll0534 | slr1513 |
| sll0083 | slr1330 | ndhK2 | slr1424 | sll1578 | slr0808 | slr1278 | ssl2598 | slr0165 | slr1513 |
| slr1330 | slr1755 | ndhK2 | slr1423 | sll1578 | slr0082 | slr0783 | ssl2598 | sll0030 | slr1513 |
| sll0057 | slr1330 | ndhK2 | sll2010 | sll1578 | slr0742 | sll1198 | ssl2598 | slr0847 | slr1513 |
| sll0017 | slr1330 | ndhK2 | slr0528 | sll0098 | sll1578 | sll0204 | ssl2598 | slr0553 | slr1513 |
| sll1185 | slr1330 | ndhK2 | slr1351 | sll1578 | slr1646 | sll1750 | ssl2598 | slr0812 | slr1513 |
| slr0839 | slr1330 | ndhK2 | sll0622 | sll1578 | slr1130 | sll0420 | ssl2598 | slr1347 | slr1513 |
| sll1876 | slr1330 | ndhK2 | sll0631 | sll1578 | slr0080 | slr1256 | ssl2598 | slr1348 | slr1513 |
| sll0900 | slr1330 | ndhK2 | slr0787 | sll1578 | slr0551 | sll1639 | ssl2598 | slr1513 | slr1791 |
| slr0608 | slr1330 | ndhK2 | sll1852 | sll0145 | sll1578 | slr1899 | ssl2598 | sll0594 | slr1513 |
| slr0652 | slr1330 | ndhK2 | slr1090 | sll0708 | sll1578 | sll0643 | ssl2598 | slr0550 | slr1513 |
| slr0084 | slr1330 | ndhK2 | sll0902 | sll1578 | slr0679 | slr1844 | ssl2598 | sll1058 | slr1513 |
| sll1893 | slr1330 | ndhK2 | slr0661 | sll1578 | slr0722 | sll0459 | ssl2598 | slr1513 | slr1665 |
| slr0500 | slr1330 | ndhK2 | slr0526 | sll1578 | slr0072 | sll0865 | ssl2598 | slr0536 | slr1513 |
| slr1330 | slr1560 | ndhK2 | sll1249 | sll1547 | sll1578 | slr0733 | ssl2598 | slr1513 | slr1874 |
| sll1988 | slr1330 | ndhK2 | sll0892 | sll1234 | sll1578 | sll1459 | ssl2598 | sll1776 | slr1513 |
| slr1289 | slr1330 | ndhK2 | sll0660 | sll0616 | sll1578 | sll0905 | ssl2598 | sll0848 | slr1513 |
| sll1556 | slr1330 | ndhK2 | slr1779 | sll1578 | slr2073 | sll0402 | sml0001 | sll0897 | slr1513 |
| slr1330 | ssl3441 | ndhK2 | slr0394 | sll1578 | slr1639 | sll0728 | sml0001 | sll1933 | slr1513 |
| slr0744 | slr1330 | ndhK2 | slr2047 | sll1108 | sll1578 | sll0336 | sml0001 | slr0965 | slr1513 |
| slr0974 | slr1330 | ndhK2 | slr0741 | sll0362 | sll1578 | sll1299 | sml0001 | slr1463 | slr1513 |

|         |         |       |         |         |         |         |         |         |         |
|---------|---------|-------|---------|---------|---------|---------|---------|---------|---------|
| slr1330 | slr1622 | ndhK2 | slr1510 | sll1578 | slr0958 | sml0001 | ssl2084 | sll1098 | slr1513 |
| sll1196 | slr1330 | ndhK2 | sll1043 | sll1578 | slr1720 | sll2001 | sml0001 | slr0434 | slr1513 |
| sll0745 | slr1330 | ndhK2 | slr0400 | sll0179 | sll1578 | sll1430 | sml0001 | sll1261 | slr1513 |
| sll1815 | slr1330 | ndhK2 | sll1415 | sll0454 | sll1578 | sll0573 | sml0001 | sll1099 | slr1513 |
| sll1059 | slr1330 | ndhK2 | sll1909 | sll1553 | sll1578 | slr1898 | sml0001 | slr0752 | slr1513 |
| slr1123 | slr1330 | ndhK2 | sll0373 | sll1578 | slr0638 | sll0080 | sml0001 | slr0952 | slr1513 |
| sll1760 | slr1330 | ndhK2 | slr2035 | sll1578 | slr0220 | slr1022 | sml0001 | slr1511 | slr1513 |
| sll0469 | slr1330 | ndhK2 | slr2132 | sll1578 | slr0357 | sll1883 | sml0001 | sll1605 | slr1513 |
| slr1330 | slr1517 | ndhK2 | slr0922 | sll1362 | sll1578 | slr1133 | sml0001 | sll0990 | slr1513 |
| sll0869 | slr1330 | ndhK2 | slr0838 | sll1578 | slr1550 | slr0444 | sml0001 | sll1633 | slr1513 |
| slr1330 | slr1598 | ndhK2 | sll1823 | sll1074 | sll1578 | slr2130 | sml0001 | slr0018 | slr1513 |
| sll0868 | slr1330 | ndhK2 | sll1056 | sll1578 | slr0649 | sll1669 | sml0001 | sll0567 | slr1513 |
| slr0994 | slr1330 | ndhK2 | slr0520 | sll0495 | sll1578 | slr0585 | sml0001 | slr0884 | slr1513 |
| sll0379 | slr1330 | ndhK2 | sll0144 | sll1425 | sll1578 | slr2075 | sml0001 | sll1342 | slr1513 |
| sll1676 | slr1330 | ndhK2 | sll0467 | sll0502 | sll1578 | slr2076 | sml0001 | slr1349 | slr1513 |
| sll0927 | slr1330 | ndhK2 | slr0711 | sll1578 | slr1703 | sll0416 | sml0001 | sll0593 | slr1513 |
| sll0996 | slr1330 | ndhK2 | sll0754 | sll0078 | sll1578 | slr0156 | sml0001 | sll0220 | slr1513 |
| sll0844 | slr1330 | ndhK2 | sll0569 | sll1578 | slr0557 | slr1641 | sml0001 | sll0899 | slr1513 |
| sll1615 | slr1330 | ndhK2 | sll1277 | sll1578 | slr1884 | slr0542 | sml0001 | slr1513 | slr1756 |
| sll0202 | slr1330 | ndhK2 | sll1110 | sll1578 | slr1031 | sll0534 | sml0001 | sll1085 | slr1513 |
| slr0902 | slr1330 | ndhK2 | sll1865 | sll1578 | slr1793 | slr0165 | sml0001 | sll1931 | slr1513 |
| sll1144 | slr1330 | ndhK2 | slr1228 | sll1578 | slr0633 | sll0030 | sml0001 | sll0083 | slr1513 |
| slr0017 | slr1330 | ndhK2 | slr0808 | sll1578 | slr1278 | slr0847 | sml0001 | slr1513 | slr1755 |
| slr1330 | slr1424 | ndhK2 | slr0082 | sll1578 | slr0783 | slr0553 | sml0001 | sll0057 | slr1513 |
| slr1330 | slr1423 | ndhK2 | slr0742 | sll1198 | sll1578 | slr0812 | sml0001 | sll0017 | slr1513 |
| sll2010 | slr1330 | ndhK2 | sll0098 | sll0204 | sll1578 | slr1347 | sml0001 | sll1185 | slr1513 |
| slr0528 | slr1330 | ndhK2 | slr1646 | sll1578 | sll1750 | slr1348 | sml0001 | slr0839 | slr1513 |
| slr1330 | slr1351 | ndhK2 | slr1130 | sll0420 | sll1578 | slr1791 | sml0001 | sll1876 | slr1513 |
| sll0622 | slr1330 | ndhK2 | slr0080 | sll1578 | slr1256 | sll0594 | sml0001 | sll0900 | slr1513 |
| sll0631 | slr1330 | ndhK2 | slr0551 | sll1578 | sll1639 | slr0550 | sml0001 | slr0608 | slr1513 |
| slr0787 | slr1330 | ndhK2 | sll0145 | sll1578 | slr1899 | sll1058 | sml0001 | slr0652 | slr1513 |
| sll1852 | slr1330 | ndhK2 | sll0708 | sll0643 | sll1578 | slr1665 | sml0001 | slr0084 | slr1513 |
| slr1090 | slr1330 | ndhK2 | slr0679 | sll1578 | slr1844 | slr0536 | sml0001 | sll1893 | slr1513 |
| sll0902 | slr1330 | ndhK2 | slr0722 | sll0459 | sll1578 | slr1874 | sml0001 | slr0500 | slr1513 |
| slr0661 | slr1330 | ndhK2 | slr0072 | sll0865 | sll1578 | sll1776 | sml0001 | slr1513 | slr1560 |
| slr0526 | slr1330 | ndhK2 | sll1547 | sll1578 | slr0733 | sll0848 | sml0001 | sll1988 | slr1513 |
| sll1249 | slr1330 | ndhK2 | sll1234 | sll1459 | sll1578 | sll0897 | sml0001 | slr1289 | slr1513 |
| sll0892 | slr1330 | ndhK2 | sll0616 | sll0905 | sll1578 | sll1933 | sml0001 | sll1556 | slr1513 |
| sll0660 | slr1330 | ndhK2 | slr2073 | sll0402 | sll1577 | slr0965 | sml0001 | slr1513 | ssl3441 |
| slr1330 | slr1779 | ndhK2 | slr1639 | sll0728 | sll1577 | slr1463 | sml0001 | slr0744 | slr1513 |
| slr0394 | slr1330 | ndhK2 | sll1108 | sll0336 | sll1577 | sll1098 | sml0001 | slr0974 | slr1513 |
| slr1330 | slr2047 | ndhK2 | sll0362 | sll1299 | sll1577 | slr0434 | sml0001 | slr1513 | slr1622 |
| slr0741 | slr1330 | ndhK2 | slr0958 | sll1577 | ssl2084 | sll1261 | sml0001 | sll1196 | slr1513 |
| slr1330 | slr1510 | ndhK2 | slr1720 | sll1577 | sll2001 | sll1099 | sml0001 | sll0745 | slr1513 |
| sll1043 | slr1330 | ndhK2 | sll0179 | sll1430 | sll1577 | slr0752 | sml0001 | sll1815 | slr1513 |
| slr0400 | slr1330 | ndhK2 | sll0454 | sll0573 | sll1577 | slr0952 | sml0001 | sll1059 | slr1513 |
| sll1415 | slr1330 | ndhK2 | sll1553 | sll1577 | slr1898 | slr1511 | sml0001 | slr1123 | slr1513 |
| sll1909 | slr1330 | ndhK2 | slr0638 | sll0080 | sll1577 | sll1605 | sml0001 | sll1760 | slr1513 |
| sll0373 | slr1330 | ndhK2 | slr0220 | sll1577 | slr1022 | sll0990 | sml0001 | sll0469 | slr1513 |
| slr1330 | slr2035 | ndhK2 | slr0357 | sll1577 | sll1883 | sll1633 | sml0001 | slr1513 | slr1517 |
| slr1330 | slr2132 | ndhK2 | sll1362 | sll1577 | slr1133 | slr0018 | sml0001 | sll0869 | slr1513 |

|         |         |         |         |         |         |         |         |         |         |
|---------|---------|---------|---------|---------|---------|---------|---------|---------|---------|
| slr0922 | slr1330 | ndhK2   | slr1550 | sll1577 | slr0444 | sll0567 | sml0001 | slr1513 | slr1598 |
| slr0838 | slr1330 | ndhK2   | sll1074 | sll1577 | slr2130 | slr0884 | sml0001 | sll0868 | slr1513 |
| sll1823 | slr1330 | ndhK2   | slr0649 | sll1577 | sll1669 | sll1342 | sml0001 | slr0994 | slr1513 |
| sll1056 | slr1330 | ndhK2   | sll0495 | sll1577 | slr0585 | slr1349 | sml0001 | sll0379 | slr1513 |
| slr0520 | slr1330 | ndhK2   | sll1425 | sll1577 | slr2075 | sll0593 | sml0001 | sll1676 | slr1513 |
| sll0144 | slr1330 | ndhK2   | sll0502 | sll1577 | slr2076 | sll0220 | sml0001 | sll0927 | slr1513 |
| sll0467 | slr1330 | ndhK2   | slr1703 | sll0416 | sll1577 | sll0899 | sml0001 | sll0996 | slr1513 |
| slr0711 | slr1330 | ndhK2   | sll0078 | sll1577 | slr0156 | slr1756 | sml0001 | sll0844 | slr1513 |
| sll0754 | slr1330 | ndhK2   | slr0557 | sll1577 | slr1641 | sll1085 | sml0001 | sll1615 | slr1513 |
| sll0569 | slr1330 | ndhK2   | slr1884 | sll1577 | slr0542 | sll1931 | sml0001 | sll0202 | slr1513 |
| sll1277 | slr1330 | ndhK2   | slr1031 | sll0534 | sll1577 | sll0083 | sml0001 | slr0902 | slr1513 |
| sll1110 | slr1330 | ndhK2   | slr1793 | sll1577 | slr0165 | slr1755 | sml0001 | sll1144 | slr1513 |
| sll1865 | slr1330 | ndhK2   | slr0633 | sll0030 | sll1577 | sll0057 | sml0001 | slr0017 | slr1513 |
| slr1228 | slr1330 | ndhK2   | slr1278 | sll1577 | slr0847 | sll0017 | sml0001 | slr1424 | slr1513 |
| slr0808 | slr1330 | ndhK2   | slr0783 | sll1577 | slr0553 | sll1185 | sml0001 | slr1423 | slr1513 |
| slr0082 | slr1330 | ndhK2   | sll1198 | sll1577 | slr0812 | slr0839 | sml0001 | sll2010 | slr1513 |
| slr0742 | slr1330 | ndhK2   | sll0204 | sll1577 | slr1347 | sll1876 | sml0001 | slr0528 | slr1513 |
| sll0098 | slr1330 | ndhK2   | sll1750 | sll1577 | slr1348 | sll0900 | sml0001 | slr1351 | slr1513 |
| slr1330 | slr1646 | ndhK2   | sll0420 | sll1577 | slr1791 | slr0608 | sml0001 | sll0622 | slr1513 |
| slr1130 | slr1330 | ndhK2   | slr1256 | sll0594 | sll1577 | slr0652 | sml0001 | sll0631 | slr1513 |
| slr0080 | slr1330 | ndhK2   | sll1639 | sll1577 | slr0550 | slr0084 | sml0001 | slr0787 | slr1513 |
| slr0551 | slr1330 | ndhK2   | slr1899 | sll1058 | sll1577 | sll1893 | sml0001 | sll1852 | slr1513 |
| sll0145 | slr1330 | ndhK2   | sll0643 | sll1577 | slr1665 | slr0500 | sml0001 | slr1090 | slr1513 |
| sll0708 | slr1330 | ndhK2   | slr1844 | sll1577 | slr0536 | slr1560 | sml0001 | sll0902 | slr1513 |
| slr0679 | slr1330 | ndhK2   | sll0459 | sll1577 | slr1874 | sll1988 | sml0001 | slr0661 | slr1513 |
| slr0722 | slr1330 | ndhK2   | sll0865 | sll1577 | sll1776 | slr1289 | sml0001 | slr0526 | slr1513 |
| slr0072 | slr1330 | ndhK2   | slr0733 | sll0848 | sll1577 | sll1556 | sml0001 | sll1249 | slr1513 |
| sll1547 | slr1330 | ndhK2   | sll1459 | sll0897 | sll1577 | sml0001 | ssl3441 | sll0892 | slr1513 |
| sll1234 | slr1330 | ndhK2   | sll0905 | sll1577 | sll1933 | slr0744 | sml0001 | sll0660 | slr1513 |
| sll0616 | slr1330 | sll0402 | ssr1386 | sll1577 | slr0965 | slr0974 | sml0001 | slr1513 | slr1779 |
| slr1330 | slr2073 | sll0728 | ssr1386 | sll1577 | slr1463 | slr1622 | sml0001 | slr0394 | slr1513 |
| slr1330 | slr1639 | sll0336 | ssr1386 | sll1098 | sll1577 | sll1196 | sml0001 | slr1513 | slr2047 |
| sll1108 | slr1330 | sll1299 | ssr1386 | sll1577 | slr0434 | sll0745 | sml0001 | slr0741 | slr1513 |
| sll0362 | slr1330 | ssl2084 | ssr1386 | sll1261 | sll1577 | sll1815 | sml0001 | slr1510 | slr1513 |
| slr0958 | slr1330 | sll2001 | ssr1386 | sll1099 | sll1577 | sll1059 | sml0001 | sll1043 | slr1513 |
| slr1330 | slr1720 | sll1430 | ssr1386 | sll1577 | slr0752 | slr1123 | sml0001 | slr0400 | slr1513 |
| sll0179 | slr1330 | sll0573 | ssr1386 | sll1577 | slr0952 | sll1760 | sml0001 | sll1415 | slr1513 |
| sll0454 | slr1330 | slr1898 | ssr1386 | sll1577 | slr1511 | sll0469 | sml0001 | sll1909 | slr1513 |
| sll1553 | slr1330 | sll0080 | ssr1386 | sll1577 | sll1605 | slr1517 | sml0001 | sll0373 | slr1513 |
| slr0638 | slr1330 | slr1022 | ssr1386 | sll0990 | sll1577 | sll0869 | sml0001 | slr1513 | slr2035 |
| slr0220 | slr1330 | sll1883 | ssr1386 | sll1577 | sll1633 | slr1598 | sml0001 | slr1513 | slr2132 |
| slr0357 | slr1330 | slr1133 | ssr1386 | sll1577 | slr0018 | sll0868 | sml0001 | slr0922 | slr1513 |
| sll1362 | slr1330 | slr0444 | ssr1386 | sll0567 | sll1577 | slr0994 | sml0001 | slr0838 | slr1513 |
| slr1330 | slr1550 | slr2130 | ssr1386 | sll1577 | slr0884 | sll0379 | sml0001 | sll1823 | slr1513 |
| sll1074 | slr1330 | sll1669 | ssr1386 | sll1342 | sll1577 | sll1676 | sml0001 | sll1056 | slr1513 |
| slr0649 | slr1330 | slr0585 | ssr1386 | sll1577 | slr1349 | sll0927 | sml0001 | slr0520 | slr1513 |
| sll0495 | slr1330 | slr2075 | ssr1386 | sll0593 | sll1577 | sll0996 | sml0001 | sll0144 | slr1513 |
| sll1425 | slr1330 | slr2076 | ssr1386 | sll0220 | sll1577 | sll0844 | sml0001 | sll0467 | slr1513 |
| sll0502 | slr1330 | sll0416 | ssr1386 | sll0899 | sll1577 | sll1615 | sml0001 | slr0711 | slr1513 |
| slr1330 | slr1703 | slr0156 | ssr1386 | sll1577 | slr1756 | sll0202 | sml0001 | sll0754 | slr1513 |
| sll0078 | slr1330 | slr1641 | ssr1386 | sll1085 | sll1577 | slr0902 | sml0001 | sll0569 | slr1513 |

|         |         |         |         |         |         |         |         |         |         |
|---------|---------|---------|---------|---------|---------|---------|---------|---------|---------|
| slr0557 | slr1330 | slr0542 | ssr1386 | sll1577 | sll1931 | sll1144 | sml0001 | sll1277 | slr1513 |
| slr1330 | slr1884 | sll0534 | ssr1386 | sll0083 | sll1577 | slr0017 | sml0001 | sll1110 | slr1513 |
| slr1031 | slr1330 | slr0165 | ssr1386 | sll1577 | slr1755 | slr1424 | sml0001 | sll1865 | slr1513 |
| slr1330 | slr1793 | sll0030 | ssr1386 | sll0057 | sll1577 | slr1423 | sml0001 | slr1228 | slr1513 |
| slr0633 | slr1330 | slr0847 | ssr1386 | sll0017 | sll1577 | sll2010 | sml0001 | slr0808 | slr1513 |
| slr1278 | slr1330 | slr0553 | ssr1386 | sll1185 | sll1577 | slr0528 | sml0001 | slr0082 | slr1513 |
| slr0783 | slr1330 | slr0812 | ssr1386 | sll1577 | slr0839 | slr1351 | sml0001 | slr0742 | slr1513 |
| sll1198 | slr1330 | slr1347 | ssr1386 | sll1577 | sll1876 | sll0622 | sml0001 | sll0098 | slr1513 |
| sll0204 | slr1330 | slr1348 | ssr1386 | sll0900 | sll1577 | sll0631 | sml0001 | slr1513 | slr1646 |
| sll1750 | slr1330 | slr1791 | ssr1386 | sll1577 | slr0608 | slr0787 | sml0001 | slr1130 | slr1513 |
| sll0420 | slr1330 | sll0594 | ssr1386 | sll1577 | slr0652 | sll1852 | sml0001 | slr0080 | slr1513 |
| slr1256 | slr1330 | slr0550 | ssr1386 | sll1577 | slr0084 | slr1090 | sml0001 | slr0551 | slr1513 |
| sll1639 | slr1330 | sll1058 | ssr1386 | sll1577 | sll1893 | sll0902 | sml0001 | sll0145 | slr1513 |
| slr1330 | slr1899 | slr1665 | ssr1386 | sll1577 | slr0500 | slr0661 | sml0001 | sll0708 | slr1513 |
| sll0643 | slr1330 | slr0536 | ssr1386 | sll1577 | slr1560 | slr0526 | sml0001 | slr0679 | slr1513 |
| slr1330 | slr1844 | slr1874 | ssr1386 | sll1577 | sll1988 | sll1249 | sml0001 | slr0722 | slr1513 |
| sll0459 | slr1330 | sll1776 | ssr1386 | sll1577 | slr1289 | sll0892 | sml0001 | slr0072 | slr1513 |
| sll0865 | slr1330 | sll0848 | ssr1386 | sll1556 | sll1577 | sll0660 | sml0001 | sll1547 | slr1513 |
| slr0733 | slr1330 | sll0897 | ssr1386 | sll1577 | ssl3441 | slr1779 | sml0001 | sll1234 | slr1513 |
| sll1459 | slr1330 | sll1933 | ssr1386 | sll1577 | slr0744 | slr0394 | sml0001 | sll0616 | slr1513 |
| sll0905 | slr1330 | slr0965 | ssr1386 | sll1577 | slr0974 | slr2047 | sml0001 | slr1513 | slr2073 |
| sll0402 | sll1324 | slr1463 | ssr1386 | sll1577 | slr1622 | slr0741 | sml0001 | slr1513 | slr1639 |
| sll0728 | sll1324 | sll1098 | ssr1386 | sll1196 | sll1577 | slr1510 | sml0001 | sll1108 | slr1513 |
| sll1299 | sll1324 | slr0434 | ssr1386 | sll0745 | sll1577 | sll1043 | sml0001 | sll0362 | slr1513 |
| sll1324 | ssl2084 | sll1261 | ssr1386 | sll1577 | sll1815 | slr0400 | sml0001 | slr0958 | slr1513 |
| sll1324 | sll2001 | sll1099 | ssr1386 | sll1059 | sll1577 | sll1415 | sml0001 | slr1513 | slr1720 |
| sll1324 | sll1430 | slr0752 | ssr1386 | sll1577 | slr1123 | sll1909 | sml0001 | sll0179 | slr1513 |
| sll0573 | sll1324 | slr0952 | ssr1386 | sll1577 | sll1760 | sll0373 | sml0001 | sll0454 | slr1513 |
| sll1324 | slr1898 | slr1511 | ssr1386 | sll0469 | sll1577 | slr2035 | sml0001 | sll1553 | slr1513 |
| sll0080 | sll1324 | sll1605 | ssr1386 | sll1577 | slr1517 | slr2132 | sml0001 | slr0638 | slr1513 |
| sll1324 | slr1022 | sll0990 | ssr1386 | sll0869 | sll1577 | slr0922 | sml0001 | slr0220 | slr1513 |
| sll1324 | sll1883 | sll1633 | ssr1386 | sll1577 | slr1598 | slr0838 | sml0001 | slr0357 | slr1513 |
| sll1324 | slr1133 | slr0018 | ssr1386 | sll0868 | sll1577 | sll1823 | sml0001 | sll1362 | slr1513 |
| sll1324 | slr0444 | sll0567 | ssr1386 | sll1577 | slr0994 | sll1056 | sml0001 | slr1513 | slr1550 |
| sll1324 | slr2130 | slr0884 | ssr1386 | sll0379 | sll1577 | slr0520 | sml0001 | sll1074 | slr1513 |
| sll1324 | sll1669 | sll1342 | ssr1386 | sll1577 | sll1676 | sll0144 | sml0001 | slr0649 | slr1513 |
| sll1324 | slr0585 | slr1349 | ssr1386 | sll0927 | sll1577 | sll0467 | sml0001 | sll0495 | slr1513 |
| sll1324 | slr2075 | sll0593 | ssr1386 | sll0996 | sll1577 | slr0711 | sml0001 | sll1425 | slr1513 |
| sll1324 | slr2076 | sll0220 | ssr1386 | sll0844 | sll1577 | sll0754 | sml0001 | sll0502 | slr1513 |
| sll0416 | sll1324 | sll0899 | ssr1386 | sll1577 | sll1615 | sll0569 | sml0001 | slr1513 | slr1703 |
| sll1324 | slr0156 | slr1756 | ssr1386 | sll0202 | sll1577 | sll1277 | sml0001 | sll0078 | slr1513 |
| sll1324 | slr1641 | sll1085 | ssr1386 | sll1577 | slr0902 | sll1110 | sml0001 | slr0557 | slr1513 |
| sll1324 | slr0542 | sll1931 | ssr1386 | sll1144 | sll1577 | sll1865 | sml0001 | slr1513 | slr1884 |
| sll0534 | sll1324 | sll0083 | ssr1386 | sll1577 | slr0017 | slr1228 | sml0001 | slr1031 | slr1513 |
| sll1324 | slr0165 | slr1755 | ssr1386 | sll1577 | slr1424 | slr0808 | sml0001 | slr1513 | slr1793 |
| sll0030 | sll1324 | sll0057 | ssr1386 | sll1577 | slr1423 | slr0082 | sml0001 | slr0633 | slr1513 |
| sll1324 | slr0847 | sll0017 | ssr1386 | sll1577 | sll2010 | slr0742 | sml0001 | slr1278 | slr1513 |
| sll1324 | slr0553 | sll1185 | ssr1386 | sll1577 | slr0528 | sll0098 | sml0001 | slr0783 | slr1513 |
| sll1324 | slr0812 | slr0839 | ssr1386 | sll1577 | slr1351 | slr1646 | sml0001 | sll1198 | slr1513 |
| sll1324 | slr1347 | sll1876 | ssr1386 | sll0622 | sll1577 | slr1130 | sml0001 | sll0204 | slr1513 |
| sll1324 | slr1348 | sll0900 | ssr1386 | sll0631 | sll1577 | slr0080 | sml0001 | sll1750 | slr1513 |

|         |         |         |         |         |         |         |         |         |         |
|---------|---------|---------|---------|---------|---------|---------|---------|---------|---------|
| sll1324 | slr1791 | slr0608 | ssr1386 | sll1577 | slr0787 | slr0551 | sml0001 | sll0420 | slr1513 |
| sll0594 | sll1324 | slr0652 | ssr1386 | sll1577 | sll1852 | sll0145 | sml0001 | slr1256 | slr1513 |
| sll1324 | slr0550 | slr0084 | ssr1386 | sll1577 | slr1090 | sll0708 | sml0001 | sll1639 | slr1513 |
| sll1058 | sll1324 | sll1893 | ssr1386 | sll0902 | sll1577 | slr0679 | sml0001 | slr1513 | slr1899 |
| sll1324 | slr1665 | slr0500 | ssr1386 | sll1577 | slr0661 | slr0722 | sml0001 | sll0643 | slr1513 |
| sll1324 | slr0536 | slr1560 | ssr1386 | sll1577 | slr0526 | slr0072 | sml0001 | slr1513 | slr1844 |
| sll1324 | slr1874 | sll1988 | ssr1386 | sll1249 | sll1577 | sll1547 | sml0001 | sll0459 | slr1513 |
| sll1324 | sll1776 | slr1289 | ssr1386 | sll0892 | sll1577 | sll1234 | sml0001 | sll0865 | slr1513 |
| sll0848 | sll1324 | sll1556 | ssr1386 | sll0660 | sll1577 | sll0616 | sml0001 | slr0733 | slr1513 |
| sll0897 | sll1324 | ssl3441 | ssr1386 | sll1577 | slr1779 | slr2073 | sml0001 | sll1459 | slr1513 |
| sll1324 | sll1933 | slr0744 | ssr1386 | sll1577 | slr0394 | slr1639 | sml0001 | sll0905 | slr1513 |
| sll1324 | slr0965 | slr0974 | ssr1386 | sll1577 | slr2047 | sll1108 | sml0001 | sll0402 | sll1697 |
| sll1324 | slr1463 | slr1622 | ssr1386 | sll1577 | slr0741 | sll0362 | sml0001 | sll0728 | sll1697 |
| sll1098 | sll1324 | sll1196 | ssr1386 | sll1577 | slr1510 | slr0958 | sml0001 | sll0336 | sll1697 |
| sll1324 | slr0434 | sll0745 | ssr1386 | sll1043 | sll1577 | slr1720 | sml0001 | sll1299 | sll1697 |
| sll1261 | sll1324 | sll1815 | ssr1386 | sll1577 | slr0400 | sll0179 | sml0001 | sll1697 | ssl2084 |
| sll1099 | sll1324 | sll1059 | ssr1386 | sll1415 | sll1577 | sll0454 | sml0001 | sll1697 | sll2001 |
| sll1324 | slr0752 | slr1123 | ssr1386 | sll1577 | sll1909 | sll1553 | sml0001 | sll1430 | sll1697 |
| sll1324 | slr0952 | sll1760 | ssr1386 | sll0373 | sll1577 | slr0638 | sml0001 | sll0573 | sll1697 |
| sll1324 | slr1511 | sll0469 | ssr1386 | sll1577 | slr2035 | slr0220 | sml0001 | sll1697 | slr1898 |
| sll1324 | sll1605 | slr1517 | ssr1386 | sll1577 | slr2132 | slr0357 | sml0001 | sll0080 | sll1697 |
| sll0990 | sll1324 | sll0869 | ssr1386 | sll1577 | slr0922 | sll1362 | sml0001 | sll1697 | slr1022 |
| sll1324 | sll1633 | slr1598 | ssr1386 | sll1577 | slr0838 | slr1550 | sml0001 | sll1697 | sll1883 |
| sll1324 | slr0018 | sll0868 | ssr1386 | sll1577 | sll1823 | sll1074 | sml0001 | sll1697 | slr1133 |
| sll0567 | sll1324 | slr0994 | ssr1386 | sll1056 | sll1577 | slr0649 | sml0001 | sll1697 | slr0444 |
| sll1324 | slr0884 | sll0379 | ssr1386 | sll1577 | slr0520 | sll0495 | sml0001 | sll1697 | slr2130 |
| sll1324 | sll1342 | sll1676 | ssr1386 | sll0144 | sll1577 | sll1425 | sml0001 | sll1669 | sll1697 |
| sll1324 | slr1349 | sll0927 | ssr1386 | sll0467 | sll1577 | sll0502 | sml0001 | sll1697 | slr0585 |
| sll0593 | sll1324 | sll0996 | ssr1386 | sll1577 | slr0711 | slr1703 | sml0001 | sll1697 | slr2075 |
| sll0220 | sll1324 | sll0844 | ssr1386 | sll0754 | sll1577 | sll0078 | sml0001 | sll1697 | slr2076 |
| sll0899 | sll1324 | sll1615 | ssr1386 | sll0569 | sll1577 | slr0557 | sml0001 | sll0416 | sll1697 |
| sll1324 | slr1756 | sll0202 | ssr1386 | sll1277 | sll1577 | slr1884 | sml0001 | sll1697 | slr0156 |
| sll1085 | sll1324 | slr0902 | ssr1386 | sll1110 | sll1577 | slr1031 | sml0001 | sll1697 | slr1641 |
| sll1324 | sll1931 | sll1144 | ssr1386 | sll1577 | sll1865 | slr1793 | sml0001 | sll1697 | slr0542 |
| sll0083 | sll1324 | slr0017 | ssr1386 | sll1577 | slr1228 | slr0633 | sml0001 | sll0534 | sll1697 |
| sll1324 | slr1755 | slr1424 | ssr1386 | sll1577 | slr0808 | slr1278 | sml0001 | sll1697 | slr0165 |
| sll0057 | sll1324 | slr1423 | ssr1386 | sll1577 | slr0082 | slr0783 | sml0001 | sll0030 | sll1697 |
| sll0017 | sll1324 | sll2010 | ssr1386 | sll1577 | slr0742 | sll1198 | sml0001 | sll1697 | slr0847 |
| sll1185 | sll1324 | slr0528 | ssr1386 | sll0098 | sll1577 | sll0204 | sml0001 | sll1697 | slr0553 |
| sll1324 | slr0839 | slr1351 | ssr1386 | sll1577 | slr1646 | sll1750 | sml0001 | sll1697 | slr0812 |
| sll1324 | sll1876 | sll0622 | ssr1386 | sll1577 | slr1130 | sll0420 | sml0001 | sll1697 | slr1347 |
| sll0900 | sll1324 | sll0631 | ssr1386 | sll1577 | slr0080 | slr1256 | sml0001 | sll1697 | slr1348 |
| sll1324 | slr0608 | slr0787 | ssr1386 | sll1577 | slr0551 | sll1639 | sml0001 | sll1697 | slr1791 |
| sll1324 | slr0652 | sll1852 | ssr1386 | sll0145 | sll1577 | slr1899 | sml0001 | sll0594 | sll1697 |
| sll1324 | slr0084 | slr1090 | ssr1386 | sll0708 | sll1577 | sll0643 | sml0001 | sll1697 | slr0550 |
| sll1324 | sll1893 | sll0902 | ssr1386 | sll1577 | slr0679 | slr1844 | sml0001 | sll1058 | sll1697 |
| sll1324 | slr0500 | slr0661 | ssr1386 | sll1577 | slr0722 | sll0459 | sml0001 | sll1697 | slr1665 |
| sll1324 | slr1560 | slr0526 | ssr1386 | sll1577 | slr0072 | sll0865 | sml0001 | sll1697 | slr0536 |
| sll1324 | sll1988 | sll1249 | ssr1386 | sll1547 | sll1577 | slr0733 | sml0001 | sll1697 | slr1874 |
| sll1324 | slr1289 | sll0892 | ssr1386 | sll1234 | sll1577 | sll1459 | sml0001 | sll1697 | sll1776 |
| sll1324 | sll1556 | sll0660 | ssr1386 | sll0616 | sll1577 | sll0905 | sml0001 | sll0848 | sll1697 |

|         |         |         |         |         |         |         |         |         |         |
|---------|---------|---------|---------|---------|---------|---------|---------|---------|---------|
| sll1324 | ssl3441 | slr1779 | ssr1386 | sll1577 | slr2073 | sll0402 | smr0008 | sll0897 | sll1697 |
| sll1324 | slr0744 | slr0394 | ssr1386 | sll1577 | slr1639 | sll0728 | smr0008 | sll1697 | sll1933 |
| sll1324 | slr0974 | slr2047 | ssr1386 | sll1108 | sll1577 | sll0336 | smr0008 | sll1697 | slr0965 |
| sll1324 | slr1622 | slr0741 | ssr1386 | sll0362 | sll1577 | sll1299 | smr0008 | sll1697 | slr1463 |
| sll1196 | sll1324 | slr1510 | ssr1386 | sll1577 | slr0958 | smr0008 | ssl2084 | sll1098 | sll1697 |
| sll0745 | sll1324 | sll1043 | ssr1386 | sll1577 | slr1720 | sll2001 | smr0008 | sll1697 | slr0434 |
| sll1324 | sll1815 | slr0400 | ssr1386 | sll0179 | sll1577 | sll1430 | smr0008 | sll1261 | sll1697 |
| sll1059 | sll1324 | sll1415 | ssr1386 | sll0454 | sll1577 | sll0573 | smr0008 | sll1099 | sll1697 |
| sll1324 | slr1123 | sll1909 | ssr1386 | sll1553 | sll1577 | slr1898 | smr0008 | sll1697 | slr0752 |
| sll1324 | sll1760 | sll0373 | ssr1386 | sll1577 | slr0638 | sll0080 | smr0008 | sll1697 | slr0952 |
| sll0469 | sll1324 | slr2035 | ssr1386 | sll1577 | slr0220 | slr1022 | smr0008 | sll1697 | slr1511 |
| sll1324 | slr1517 | slr2132 | ssr1386 | sll1577 | slr0357 | sll1883 | smr0008 | sll1605 | sll1697 |
| sll0869 | sll1324 | slr0922 | ssr1386 | sll1362 | sll1577 | slr1133 | smr0008 | sll0990 | sll1697 |
| sll1324 | slr1598 | slr0838 | ssr1386 | sll1577 | slr1550 | slr0444 | smr0008 | sll1633 | sll1697 |
| sll0868 | sll1324 | sll1823 | ssr1386 | sll1074 | sll1577 | slr2130 | smr0008 | sll1697 | slr0018 |
| sll1324 | slr0994 | sll1056 | ssr1386 | sll1577 | slr0649 | sll1669 | smr0008 | sll0567 | sll1697 |
| sll0379 | sll1324 | slr0520 | ssr1386 | sll0495 | sll1577 | slr0585 | smr0008 | sll1697 | slr0884 |
| sll1324 | sll1676 | sll0144 | ssr1386 | sll1425 | sll1577 | slr2075 | smr0008 | sll1342 | sll1697 |
| sll0927 | sll1324 | sll0467 | ssr1386 | sll0502 | sll1577 | slr2076 | smr0008 | sll1697 | slr1349 |
| sll0996 | sll1324 | slr0711 | ssr1386 | sll1577 | slr1703 | sll0416 | smr0008 | sll0593 | sll1697 |
| sll0844 | sll1324 | sll0754 | ssr1386 | sll0078 | sll1577 | slr0156 | smr0008 | sll0220 | sll1697 |
| sll1324 | sll1615 | sll0569 | ssr1386 | sll1577 | slr0557 | slr1641 | smr0008 | sll0899 | sll1697 |
| sll0202 | sll1324 | sll1277 | ssr1386 | sll1577 | slr1884 | slr0542 | smr0008 | sll1697 | slr1756 |
| sll1324 | slr0902 | sll1110 | ssr1386 | sll1577 | slr1031 | sll0534 | smr0008 | sll1085 | sll1697 |
| sll1144 | sll1324 | sll1865 | ssr1386 | sll1577 | slr1793 | slr0165 | smr0008 | sll1697 | sll1931 |
| sll1324 | slr0017 | slr1228 | ssr1386 | sll1577 | slr0633 | sll0030 | smr0008 | sll0083 | sll1697 |
| sll1324 | slr1424 | slr0808 | ssr1386 | sll1577 | slr1278 | slr0847 | smr0008 | sll1697 | slr1755 |
| sll1324 | slr1423 | slr0082 | ssr1386 | sll1577 | slr0783 | slr0553 | smr0008 | sll0057 | sll1697 |
| sll1324 | sll2010 | slr0742 | ssr1386 | sll1198 | sll1577 | slr0812 | smr0008 | sll0017 | sll1697 |
| sll1324 | slr0528 | sll0098 | ssr1386 | sll0204 | sll1577 | slr1347 | smr0008 | sll1185 | sll1697 |
| sll1324 | slr1351 | slr1646 | ssr1386 | sll1577 | sll1750 | slr1348 | smr0008 | sll1697 | slr0839 |
| sll0622 | sll1324 | slr1130 | ssr1386 | sll0420 | sll1577 | slr1791 | smr0008 | sll1697 | sll1876 |
| sll0631 | sll1324 | slr0080 | ssr1386 | sll1577 | slr1256 | sll0594 | smr0008 | sll0900 | sll1697 |
| sll1324 | slr0787 | slr0551 | ssr1386 | sll1577 | sll1639 | slr0550 | smr0008 | sll1697 | slr0608 |
| sll1324 | sll1852 | sll0145 | ssr1386 | sll1577 | slr1899 | sll1058 | smr0008 | sll1697 | slr0652 |
| sll1324 | slr1090 | sll0708 | ssr1386 | sll0643 | sll1577 | slr1665 | smr0008 | sll1697 | slr0084 |
| sll0902 | sll1324 | slr0679 | ssr1386 | sll1577 | slr1844 | slr0536 | smr0008 | sll1697 | sll1893 |
| sll1324 | slr0661 | slr0722 | ssr1386 | sll0459 | sll1577 | slr1874 | smr0008 | sll1697 | slr0500 |
| sll1324 | slr0526 | slr0072 | ssr1386 | sll0865 | sll1577 | sll1776 | smr0008 | sll1697 | slr1560 |
| sll1249 | sll1324 | sll1547 | ssr1386 | sll1577 | slr0733 | sll0848 | smr0008 | sll1697 | sll1988 |
| sll0892 | sll1324 | sll1234 | ssr1386 | sll1459 | sll1577 | sll0897 | smr0008 | sll1697 | slr1289 |
| sll0660 | sll1324 | sll0616 | ssr1386 | sll0905 | sll1577 | sll1933 | smr0008 | sll1556 | sll1697 |
| sll1324 | slr1779 | slr2073 | ssr1386 | sll0402 | slr1834 | slr0965 | smr0008 | sll1697 | ssl3441 |
| sll1324 | slr0394 | slr1639 | ssr1386 | sll0728 | slr1834 | slr1463 | smr0008 | sll1697 | slr0744 |
| sll1324 | slr2047 | sll1108 | ssr1386 | sll0336 | slr1834 | sll1098 | smr0008 | sll1697 | slr0974 |
| sll1324 | slr0741 | sll0362 | ssr1386 | sll1299 | slr1834 | slr0434 | smr0008 | sll1697 | slr1622 |
| sll1324 | slr1510 | slr0958 | ssr1386 | slr1834 | ssl2084 | sll1261 | smr0008 | sll1196 | sll1697 |
| sll1043 | sll1324 | slr1720 | ssr1386 | sll2001 | slr1834 | sll1099 | smr0008 | sll0745 | sll1697 |
| sll1324 | slr0400 | sll0179 | ssr1386 | sll1430 | slr1834 | slr0752 | smr0008 | sll1697 | sll1815 |
| sll1324 | sll1415 | sll0454 | ssr1386 | sll0573 | slr1834 | slr0952 | smr0008 | sll1059 | sll1697 |
| sll1324 | sll1909 | sll1553 | ssr1386 | slr1834 | slr1898 | slr1511 | smr0008 | sll1697 | slr1123 |



|         |         |         |         |         |         |         |         |         |         |
|---------|---------|---------|---------|---------|---------|---------|---------|---------|---------|
| sll0373 | sll1324 | slr0638 | ssr1386 | sll0080 | slr1834 | sll1605 | smr0008 | sll1697 | sll1760 |
| sll1324 | slr2035 | slr0220 | ssr1386 | slr1022 | slr1834 | sll0990 | smr0008 | sll0469 | sll1697 |
| sll1324 | slr2132 | slr0357 | ssr1386 | sll1883 | slr1834 | sll1633 | smr0008 | sll1697 | slr1517 |
| sll1324 | slr0922 | sll1362 | ssr1386 | slr1133 | slr1834 | slr0018 | smr0008 | sll0869 | sll1697 |
| sll1324 | slr0838 | slr1550 | ssr1386 | slr0444 | slr1834 | sll0567 | smr0008 | sll1697 | slr1598 |
| sll1324 | sll1823 | sll1074 | ssr1386 | slr1834 | slr2130 | slr0884 | smr0008 | sll0868 | sll1697 |
| sll1056 | sll1324 | slr0649 | ssr1386 | sll1669 | slr1834 | sll1342 | smr0008 | sll1697 | slr0994 |
| sll1324 | slr0520 | sll0495 | ssr1386 | slr0585 | slr1834 | slr1349 | smr0008 | sll0379 | sll1697 |
| sll0144 | sll1324 | sll1425 | ssr1386 | slr1834 | slr2075 | sll0593 | smr0008 | sll1676 | sll1697 |
| sll0467 | sll1324 | sll0502 | ssr1386 | slr1834 | slr2076 | sll0220 | smr0008 | sll0927 | sll1697 |
| sll1324 | slr0711 | slr1703 | ssr1386 | sll0416 | slr1834 | sll0899 | smr0008 | sll0996 | sll1697 |
| sll0754 | sll1324 | sll0078 | ssr1386 | slr0156 | slr1834 | slr1756 | smr0008 | sll0844 | sll1697 |
| sll0569 | sll1324 | slr0557 | ssr1386 | slr1641 | slr1834 | sll1085 | smr0008 | sll1615 | sll1697 |
| sll1277 | sll1324 | slr1884 | ssr1386 | slr0542 | slr1834 | sll1931 | smr0008 | sll0202 | sll1697 |
| sll1110 | sll1324 | slr1031 | ssr1386 | sll0534 | slr1834 | sll0083 | smr0008 | sll1697 | slr0902 |
| sll1324 | sll1865 | slr1793 | ssr1386 | slr0165 | slr1834 | slr1755 | smr0008 | sll1144 | sll1697 |
| sll1324 | slr1228 | slr0633 | ssr1386 | sll0030 | slr1834 | sll0057 | smr0008 | sll1697 | slr0017 |
| sll1324 | slr0808 | slr1278 | ssr1386 | slr0847 | slr1834 | sll0017 | smr0008 | sll1697 | slr1424 |
| sll1324 | slr0082 | slr0783 | ssr1386 | slr0553 | slr1834 | sll1185 | smr0008 | sll1697 | slr1423 |
| sll1324 | slr0742 | sll1198 | ssr1386 | slr0812 | slr1834 | slr0839 | smr0008 | sll1697 | sll2010 |
| sll0098 | sll1324 | sll0204 | ssr1386 | slr1347 | slr1834 | sll1876 | smr0008 | sll1697 | slr0528 |
| sll1324 | slr1646 | sll1750 | ssr1386 | slr1348 | slr1834 | sll0900 | smr0008 | sll1697 | slr1351 |
| sll1324 | slr1130 | sll0420 | ssr1386 | slr1791 | slr1834 | slr0608 | smr0008 | sll0622 | sll1697 |
| sll1324 | slr0080 | slr1256 | ssr1386 | sll0594 | slr1834 | slr0652 | smr0008 | sll0631 | sll1697 |
| sll1324 | slr0551 | sll1639 | ssr1386 | slr0550 | slr1834 | slr0084 | smr0008 | sll1697 | slr0787 |
| sll0145 | sll1324 | slr1899 | ssr1386 | sll1058 | slr1834 | sll1893 | smr0008 | sll1697 | sll1852 |
| sll0708 | sll1324 | sll0643 | ssr1386 | slr1665 | slr1834 | slr0500 | smr0008 | sll1697 | slr1090 |
| sll1324 | slr0679 | slr1844 | ssr1386 | slr0536 | slr1834 | slr1560 | smr0008 | sll0902 | sll1697 |
| sll1324 | slr0722 | sll0459 | ssr1386 | slr1834 | slr1874 | sll1988 | smr0008 | sll1697 | slr0661 |
| sll1324 | slr0072 | sll0865 | ssr1386 | sll1776 | slr1834 | slr1289 | smr0008 | sll1697 | slr0526 |
| sll1324 | sll1547 | slr0733 | ssr1386 | sll0848 | slr1834 | sll1556 | smr0008 | sll1249 | sll1697 |
| sll1234 | sll1324 | sll1459 | ssr1386 | sll0897 | slr1834 | smr0008 | ssl3441 | sll0892 | sll1697 |
| sll0616 | sll1324 | sll0905 | ssr1386 | sll1933 | slr1834 | slr0744 | smr0008 | sll0660 | sll1697 |
| sll1324 | slr2073 | sll0402 | slr1623 | slr0965 | slr1834 | slr0974 | smr0008 | sll1697 | slr1779 |
| sll1324 | slr1639 | sll0728 | slr1623 | slr1463 | slr1834 | slr1622 | smr0008 | sll1697 | slr0394 |
| sll1108 | sll1324 | sll0336 | slr1623 | sll1098 | slr1834 | sll1196 | smr0008 | sll1697 | slr2047 |
| sll0362 | sll1324 | sll1299 | slr1623 | slr0434 | slr1834 | sll0745 | smr0008 | sll1697 | slr0741 |
| sll1324 | slr0958 | slr1623 | ssl2084 | sll1261 | slr1834 | sll1815 | smr0008 | sll1697 | slr1510 |
| sll1324 | slr1720 | sll2001 | slr1623 | sll1099 | slr1834 | sll1059 | smr0008 | sll1043 | sll1697 |
| sll0179 | sll1324 | sll1430 | slr1623 | slr0752 | slr1834 | slr1123 | smr0008 | sll1697 | slr0400 |
| sll0454 | sll1324 | sll0573 | slr1623 | slr0952 | slr1834 | sll1760 | smr0008 | sll1415 | sll1697 |
| sll1324 | sll1553 | slr1623 | slr1898 | slr1511 | slr1834 | sll0469 | smr0008 | sll1697 | sll1909 |
| sll1324 | slr0638 | sll0080 | slr1623 | sll1605 | slr1834 | slr1517 | smr0008 | sll0373 | sll1697 |
| sll1324 | slr0220 | slr1022 | slr1623 | sll0990 | slr1834 | sll0869 | smr0008 | sll1697 | slr2035 |
| sll1324 | slr0357 | sll1883 | slr1623 | sll1633 | slr1834 | slr1598 | smr0008 | sll1697 | slr2132 |
| sll1324 | sll1362 | slr1133 | slr1623 | slr0018 | slr1834 | sll0868 | smr0008 | sll1697 | slr0922 |
| sll1324 | slr1550 | slr0444 | slr1623 | sll0567 | slr1834 | slr0994 | smr0008 | sll1697 | slr0838 |
| sll1074 | sll1324 | slr1623 | slr2130 | slr0884 | slr1834 | sll0379 | smr0008 | sll1697 | sll1823 |
| sll1324 | slr0649 | sll1669 | slr1623 | sll1342 | slr1834 | sll1676 | smr0008 | sll1056 | sll1697 |
| sll0495 | sll1324 | slr0585 | slr1623 | slr1349 | slr1834 | sll0927 | smr0008 | sll1697 | slr0520 |
| sll1324 | sll1425 | slr1623 | slr2075 | sll0593 | slr1834 | sll0996 | smr0008 | sll0144 | sll1697 |

|         |         |         |         |         |         |         |         |         |         |
|---------|---------|---------|---------|---------|---------|---------|---------|---------|---------|
| sll0502 | sll1324 | slr1623 | slr2076 | sll0220 | slr1834 | sll0844 | smr0008 | sll0467 | sll1697 |
| sll1324 | slr1703 | sll0416 | slr1623 | sll0899 | slr1834 | sll1615 | smr0008 | sll1697 | slr0711 |
| sll0078 | sll1324 | slr0156 | slr1623 | slr1756 | slr1834 | sll0202 | smr0008 | sll0754 | sll1697 |
| sll1324 | slr0557 | slr1623 | slr1641 | sll1085 | slr1834 | slr0902 | smr0008 | sll0569 | sll1697 |
| sll1324 | slr1884 | slr0542 | slr1623 | sll1931 | slr1834 | sll1144 | smr0008 | sll1277 | sll1697 |
| sll1324 | slr1031 | sll0534 | slr1623 | sll0083 | slr1834 | slr0017 | smr0008 | sll1110 | sll1697 |
| sll1324 | slr1793 | slr0165 | slr1623 | slr1755 | slr1834 | slr1424 | smr0008 | sll1697 | sll1865 |
| sll1324 | slr0633 | sll0030 | slr1623 | sll0057 | slr1834 | slr1423 | smr0008 | sll1697 | slr1228 |
| sll1324 | slr1278 | slr0847 | slr1623 | sll0017 | slr1834 | sll2010 | smr0008 | sll1697 | slr0808 |
| sll1324 | slr0783 | slr0553 | slr1623 | sll1185 | slr1834 | slr0528 | smr0008 | sll1697 | slr0082 |
| sll1198 | sll1324 | slr0812 | slr1623 | slr0839 | slr1834 | slr1351 | smr0008 | sll1697 | slr0742 |
| sll0204 | sll1324 | slr1347 | slr1623 | sll1876 | slr1834 | sll0622 | smr0008 | sll0098 | sll1697 |
| sll1324 | sll1750 | slr1348 | slr1623 | sll0900 | slr1834 | sll0631 | smr0008 | sll1697 | slr1646 |
| sll0420 | sll1324 | slr1623 | slr1791 | slr0608 | slr1834 | slr0787 | smr0008 | sll1697 | slr1130 |
| sll1324 | slr1256 | sll0594 | slr1623 | slr0652 | slr1834 | sll1852 | smr0008 | sll1697 | slr0080 |
| sll1324 | sll1639 | slr0550 | slr1623 | slr0084 | slr1834 | slr1090 | smr0008 | sll1697 | slr0551 |
| sll1324 | slr1899 | sll1058 | slr1623 | sll1893 | slr1834 | sll0902 | smr0008 | sll0145 | sll1697 |
| sll0643 | sll1324 | slr1623 | slr1665 | slr0500 | slr1834 | slr0661 | smr0008 | sll0708 | sll1697 |
| sll1324 | slr1844 | slr0536 | slr1623 | slr1560 | slr1834 | slr0526 | smr0008 | sll1697 | slr0679 |
| sll0459 | sll1324 | slr1623 | slr1874 | sll1988 | slr1834 | sll1249 | smr0008 | sll1697 | slr0722 |
| sll0865 | sll1324 | sll1776 | slr1623 | slr1289 | slr1834 | sll0892 | smr0008 | sll1697 | slr0072 |
| sll1324 | slr0733 | sll0848 | slr1623 | sll1556 | slr1834 | sll0660 | smr0008 | sll1547 | sll1697 |
| sll1324 | sll1459 | sll0897 | slr1623 | slr1834 | ssl3441 | slr1779 | smr0008 | sll1234 | sll1697 |
| sll0905 | sll1324 | sll1933 | slr1623 | slr0744 | slr1834 | slr0394 | smr0008 | sll0616 | sll1697 |
| sll0402 | sll1327 | slr0965 | slr1623 | slr0974 | slr1834 | slr2047 | smr0008 | sll1697 | slr2073 |
| sll0728 | sll1327 | slr1463 | slr1623 | slr1622 | slr1834 | slr0741 | smr0008 | sll1697 | slr1639 |
| sll0336 | sll1327 | sll1098 | slr1623 | sll1196 | slr1834 | slr1510 | smr0008 | sll1108 | sll1697 |
| sll1299 | sll1327 | slr0434 | slr1623 | sll0745 | slr1834 | sll1043 | smr0008 | sll0362 | sll1697 |
| sll1327 | ssl2084 | sll1261 | slr1623 | sll1815 | slr1834 | slr0400 | smr0008 | sll1697 | slr0958 |
| sll1327 | sll2001 | sll1099 | slr1623 | sll1059 | slr1834 | sll1415 | smr0008 | sll1697 | slr1720 |
| sll1327 | sll1430 | slr0752 | slr1623 | slr1123 | slr1834 | sll1909 | smr0008 | sll0179 | sll1697 |
| sll0573 | sll1327 | slr0952 | slr1623 | sll1760 | slr1834 | sll0373 | smr0008 | sll0454 | sll1697 |
| sll1327 | slr1898 | slr1511 | slr1623 | sll0469 | slr1834 | slr2035 | smr0008 | sll1553 | sll1697 |
| sll0080 | sll1327 | sll1605 | slr1623 | slr1517 | slr1834 | slr2132 | smr0008 | sll1697 | slr0638 |
| sll1327 | slr1022 | sll0990 | slr1623 | sll0869 | slr1834 | slr0922 | smr0008 | sll1697 | slr0220 |
| sll1327 | sll1883 | sll1633 | slr1623 | slr1598 | slr1834 | slr0838 | smr0008 | sll1697 | slr0357 |
| sll1327 | slr1133 | slr0018 | slr1623 | sll0868 | slr1834 | sll1823 | smr0008 | sll1362 | sll1697 |
| sll1327 | slr0444 | sll0567 | slr1623 | slr0994 | slr1834 | sll1056 | smr0008 | sll1697 | slr1550 |
| sll1327 | slr2130 | slr0884 | slr1623 | sll0379 | slr1834 | slr0520 | smr0008 | sll1074 | sll1697 |
| sll1327 | sll1669 | sll1342 | slr1623 | sll1676 | slr1834 | sll0144 | smr0008 | sll1697 | slr0649 |
| sll1327 | slr0585 | slr1349 | slr1623 | sll0927 | slr1834 | sll0467 | smr0008 | sll0495 | sll1697 |
| sll1327 | slr2075 | sll0593 | slr1623 | sll0996 | slr1834 | slr0711 | smr0008 | sll1425 | sll1697 |
| sll1327 | slr2076 | sll0220 | slr1623 | sll0844 | slr1834 | sll0754 | smr0008 | sll0502 | sll1697 |
| sll0416 | sll1327 | sll0899 | slr1623 | sll1615 | slr1834 | sll0569 | smr0008 | sll1697 | slr1703 |
| sll1327 | slr0156 | slr1623 | slr1756 | sll0202 | slr1834 | sll1277 | smr0008 | sll0078 | sll1697 |
| sll1327 | slr1641 | sll1085 | slr1623 | slr0902 | slr1834 | sll1110 | smr0008 | sll1697 | slr0557 |
| sll1327 | slr0542 | sll1931 | slr1623 | sll1144 | slr1834 | sll1865 | smr0008 | sll1697 | slr1884 |
| sll0534 | sll1327 | sll0083 | slr1623 | slr0017 | slr1834 | slr1228 | smr0008 | sll1697 | slr1031 |
| sll1327 | slr0165 | slr1623 | slr1755 | slr1424 | slr1834 | slr0808 | smr0008 | sll1697 | slr1793 |
| sll0030 | sll1327 | sll0057 | slr1623 | slr1423 | slr1834 | slr0082 | smr0008 | sll1697 | slr0633 |
| sll1327 | slr0847 | sll0017 | slr1623 | sll2010 | slr1834 | slr0742 | smr0008 | sll1697 | slr1278 |

|         |         |         |         |         |         |         |         |         |         |
|---------|---------|---------|---------|---------|---------|---------|---------|---------|---------|
| sll1327 | slr0553 | sll1185 | slr1623 | slr0528 | slr1834 | sll0098 | smr0008 | sll1697 | slr0783 |
| sll1327 | slr0812 | slr0839 | slr1623 | slr1351 | slr1834 | slr1646 | smr0008 | sll1198 | sll1697 |
| sll1327 | slr1347 | sll1876 | slr1623 | sll0622 | slr1834 | slr1130 | smr0008 | sll0204 | sll1697 |
| sll1327 | slr1348 | sll0900 | slr1623 | sll0631 | slr1834 | slr0080 | smr0008 | sll1697 | sll1750 |
| sll1327 | slr1791 | slr0608 | slr1623 | slr0787 | slr1834 | slr0551 | smr0008 | sll0420 | sll1697 |
| sll0594 | sll1327 | slr0652 | slr1623 | sll1852 | slr1834 | sll0145 | smr0008 | sll1697 | slr1256 |
| sll1327 | slr0550 | slr0084 | slr1623 | slr1090 | slr1834 | sll0708 | smr0008 | sll1639 | sll1697 |
| sll1058 | sll1327 | sll1893 | slr1623 | sll0902 | slr1834 | slr0679 | smr0008 | sll1697 | slr1899 |
| sll1327 | slr1665 | slr0500 | slr1623 | slr0661 | slr1834 | slr0722 | smr0008 | sll0643 | sll1697 |
| sll1327 | slr0536 | slr1560 | slr1623 | slr0526 | slr1834 | slr0072 | smr0008 | sll1697 | slr1844 |
| sll1327 | slr1874 | sll1988 | slr1623 | sll1249 | slr1834 | sll1547 | smr0008 | sll0459 | sll1697 |
| sll1327 | sll1776 | slr1289 | slr1623 | sll0892 | slr1834 | sll1234 | smr0008 | sll0865 | sll1697 |
| sll0848 | sll1327 | sll1556 | slr1623 | sll0660 | slr1834 | sll0616 | smr0008 | sll1697 | slr0733 |
| sll0897 | sll1327 | slr1623 | ssl3441 | slr1779 | slr1834 | slr2073 | smr0008 | sll1459 | sll1697 |
| sll1327 | sll1933 | slr0744 | slr1623 | slr0394 | slr1834 | slr1639 | smr0008 | sll0905 | sll1697 |
| sll1327 | slr0965 | slr0974 | slr1623 | slr1834 | slr2047 | sll1108 | smr0008 | sll0402 | slr1796 |
| sll1327 | slr1463 | slr1622 | slr1623 | slr0741 | slr1834 | sll0362 | smr0008 | sll0728 | slr1796 |
| sll1098 | sll1327 | sll1196 | slr1623 | slr1510 | slr1834 | slr0958 | smr0008 | sll0336 | slr1796 |
| sll1327 | slr0434 | sll0745 | slr1623 | sll1043 | slr1834 | slr1720 | smr0008 | sll1299 | slr1796 |
| sll1261 | sll1327 | sll1815 | slr1623 | slr0400 | slr1834 | sll0179 | smr0008 | slr1796 | ssl2084 |
| sll1099 | sll1327 | sll1059 | slr1623 | sll1415 | slr1834 | sll0454 | smr0008 | sll2001 | slr1796 |
| sll1327 | slr0752 | slr1123 | slr1623 | sll1909 | slr1834 | sll1553 | smr0008 | sll1430 | slr1796 |
| sll1327 | slr0952 | sll1760 | slr1623 | sll0373 | slr1834 | slr0638 | smr0008 | sll0573 | slr1796 |
| sll1327 | slr1511 | sll0469 | slr1623 | slr1834 | slr2035 | slr0220 | smr0008 | slr1796 | slr1898 |
| sll1327 | sll1605 | slr1517 | slr1623 | slr1834 | slr2132 | slr0357 | smr0008 | sll0080 | slr1796 |
| sll0990 | sll1327 | sll0869 | slr1623 | slr0922 | slr1834 | sll1362 | smr0008 | slr1022 | slr1796 |
| sll1327 | sll1633 | slr1598 | slr1623 | slr0838 | slr1834 | slr1550 | smr0008 | sll1883 | slr1796 |
| sll1327 | slr0018 | sll0868 | slr1623 | sll1823 | slr1834 | sll1074 | smr0008 | slr1133 | slr1796 |
| sll0567 | sll1327 | slr0994 | slr1623 | sll1056 | slr1834 | slr0649 | smr0008 | slr0444 | slr1796 |
| sll1327 | slr0884 | sll0379 | slr1623 | slr0520 | slr1834 | sll0495 | smr0008 | slr1796 | slr2130 |
| sll1327 | sll1342 | sll1676 | slr1623 | sll0144 | slr1834 | sll1425 | smr0008 | sll1669 | slr1796 |
| sll1327 | slr1349 | sll0927 | slr1623 | sll0467 | slr1834 | sll0502 | smr0008 | slr0585 | slr1796 |
| sll0593 | sll1327 | sll0996 | slr1623 | slr0711 | slr1834 | slr1703 | smr0008 | slr1796 | slr2075 |
| sll0220 | sll1327 | sll0844 | slr1623 | sll0754 | slr1834 | sll0078 | smr0008 | slr1796 | slr2076 |
| sll0899 | sll1327 | sll1615 | slr1623 | sll0569 | slr1834 | slr0557 | smr0008 | sll0416 | slr1796 |
| sll1327 | slr1756 | sll0202 | slr1623 | sll1277 | slr1834 | slr1884 | smr0008 | slr0156 | slr1796 |
| sll1085 | sll1327 | slr0902 | slr1623 | sll1110 | slr1834 | slr1031 | smr0008 | slr1641 | slr1796 |
| sll1327 | sll1931 | sll1144 | slr1623 | sll1865 | slr1834 | slr1793 | smr0008 | slr0542 | slr1796 |
| sll0083 | sll1327 | slr0017 | slr1623 | slr1228 | slr1834 | slr0633 | smr0008 | sll0534 | slr1796 |
| sll1327 | slr1755 | slr1424 | slr1623 | slr0808 | slr1834 | slr1278 | smr0008 | slr0165 | slr1796 |
| sll0057 | sll1327 | slr1423 | slr1623 | slr0082 | slr1834 | slr0783 | smr0008 | sll0030 | slr1796 |
| sll0017 | sll1327 | sll2010 | slr1623 | slr0742 | slr1834 | sll1198 | smr0008 | slr0847 | slr1796 |
| sll1185 | sll1327 | slr0528 | slr1623 | sll0098 | slr1834 | sll0204 | smr0008 | slr0553 | slr1796 |
| sll1327 | slr0839 | slr1351 | slr1623 | slr1646 | slr1834 | sll1750 | smr0008 | slr0812 | slr1796 |
| sll1327 | sll1876 | sll0622 | slr1623 | slr1130 | slr1834 | sll0420 | smr0008 | slr1347 | slr1796 |
| sll0900 | sll1327 | sll0631 | slr1623 | slr0080 | slr1834 | slr1256 | smr0008 | slr1348 | slr1796 |
| sll1327 | slr0608 | slr0787 | slr1623 | slr0551 | slr1834 | sll1639 | smr0008 | slr1791 | slr1796 |
| sll1327 | slr0652 | sll1852 | slr1623 | sll0145 | slr1834 | slr1899 | smr0008 | sll0594 | slr1796 |
| sll1327 | slr0084 | slr1090 | slr1623 | sll0708 | slr1834 | sll0643 | smr0008 | slr0550 | slr1796 |
| sll1327 | sll1893 | sll0902 | slr1623 | slr0679 | slr1834 | slr1844 | smr0008 | sll1058 | slr1796 |
| sll1327 | slr0500 | slr0661 | slr1623 | slr0722 | slr1834 | sll0459 | smr0008 | slr1665 | slr1796 |

|         |         |         |         |         |         |         |         |         |         |
|---------|---------|---------|---------|---------|---------|---------|---------|---------|---------|
| sll1327 | slr1560 | slr0526 | slr1623 | slr0072 | slr1834 | sll0865 | smr0008 | slr0536 | slr1796 |
| sll1327 | sll1988 | sll1249 | slr1623 | sll1547 | slr1834 | slr0733 | smr0008 | slr1796 | slr1874 |
| sll1327 | slr1289 | sll0892 | slr1623 | sll1234 | slr1834 | sll1459 | smr0008 | sll1776 | slr1796 |
| sll1327 | sll1556 | sll0660 | slr1623 | sll0616 | slr1834 | sll0905 | smr0008 | sll0848 | slr1796 |
| sll1327 | ssl3441 | slr1623 | slr1779 | slr1834 | slr2073 | sll0402 | smr0007 | sll0897 | slr1796 |
| sll1327 | slr0744 | slr0394 | slr1623 | slr1639 | slr1834 | sll0728 | smr0007 | sll1933 | slr1796 |
| sll1327 | slr0974 | slr1623 | slr2047 | sll1108 | slr1834 | sll0336 | smr0007 | slr0965 | slr1796 |
| sll1327 | slr1622 | slr0741 | slr1623 | sll0362 | slr1834 | sll1299 | smr0007 | slr1463 | slr1796 |
| sll1196 | sll1327 | slr1510 | slr1623 | slr0958 | slr1834 | smr0007 | ssl2084 | sll1098 | slr1796 |
| sll0745 | sll1327 | sll1043 | slr1623 | slr1720 | slr1834 | sll2001 | smr0007 | slr0434 | slr1796 |
| sll1327 | sll1815 | slr0400 | slr1623 | sll0179 | slr1834 | sll1430 | smr0007 | sll1261 | slr1796 |
| sll1059 | sll1327 | sll1415 | slr1623 | sll0454 | slr1834 | sll0573 | smr0007 | sll1099 | slr1796 |
| sll1327 | slr1123 | sll1909 | slr1623 | sll1553 | slr1834 | slr1898 | smr0007 | slr0752 | slr1796 |
| sll1327 | sll1760 | sll0373 | slr1623 | slr0638 | slr1834 | sll0080 | smr0007 | slr0952 | slr1796 |
| sll0469 | sll1327 | slr1623 | slr2035 | slr0220 | slr1834 | slr1022 | smr0007 | slr1511 | slr1796 |
| sll1327 | slr1517 | slr1623 | slr2132 | slr0357 | slr1834 | sll1883 | smr0007 | sll1605 | slr1796 |
| sll0869 | sll1327 | slr0922 | slr1623 | sll1362 | slr1834 | slr1133 | smr0007 | sll0990 | slr1796 |
| sll1327 | slr1598 | slr0838 | slr1623 | slr1550 | slr1834 | slr0444 | smr0007 | sll1633 | slr1796 |
| sll0868 | sll1327 | sll1823 | slr1623 | sll1074 | slr1834 | slr2130 | smr0007 | slr0018 | slr1796 |
| sll1327 | slr0994 | sll1056 | slr1623 | slr0649 | slr1834 | sll1669 | smr0007 | sll0567 | slr1796 |
| sll0379 | sll1327 | slr0520 | slr1623 | sll0495 | slr1834 | slr0585 | smr0007 | slr0884 | slr1796 |
| sll1327 | sll1676 | sll0144 | slr1623 | sll1425 | slr1834 | slr2075 | smr0007 | sll1342 | slr1796 |
| sll0927 | sll1327 | sll0467 | slr1623 | sll0502 | slr1834 | slr2076 | smr0007 | slr1349 | slr1796 |
| sll0996 | sll1327 | slr0711 | slr1623 | slr1703 | slr1834 | sll0416 | smr0007 | sll0593 | slr1796 |
| sll0844 | sll1327 | sll0754 | slr1623 | sll0078 | slr1834 | slr0156 | smr0007 | sll0220 | slr1796 |
| sll1327 | sll1615 | sll0569 | slr1623 | slr0557 | slr1834 | slr1641 | smr0007 | sll0899 | slr1796 |
| sll0202 | sll1327 | sll1277 | slr1623 | slr1834 | slr1884 | slr0542 | smr0007 | slr1756 | slr1796 |
| sll1327 | slr0902 | sll1110 | slr1623 | slr1031 | slr1834 | sll0534 | smr0007 | sll1085 | slr1796 |
| sll1144 | sll1327 | sll1865 | slr1623 | slr1793 | slr1834 | slr0165 | smr0007 | sll1931 | slr1796 |
| sll1327 | slr0017 | slr1228 | slr1623 | slr0633 | slr1834 | sll0030 | smr0007 | sll0083 | slr1796 |
| sll1327 | slr1424 | slr0808 | slr1623 | slr1278 | slr1834 | slr0847 | smr0007 | slr1755 | slr1796 |
| sll1327 | slr1423 | slr0082 | slr1623 | slr0783 | slr1834 | slr0553 | smr0007 | sll0057 | slr1796 |
| sll1327 | sll2010 | slr0742 | slr1623 | sll1198 | slr1834 | slr0812 | smr0007 | sll0017 | slr1796 |
| sll1327 | slr0528 | sll0098 | slr1623 | sll0204 | slr1834 | slr1347 | smr0007 | sll1185 | slr1796 |
| sll1327 | slr1351 | slr1623 | slr1646 | sll1750 | slr1834 | slr1348 | smr0007 | slr0839 | slr1796 |
| sll0622 | sll1327 | slr1130 | slr1623 | sll0420 | slr1834 | slr1791 | smr0007 | sll1876 | slr1796 |
| sll0631 | sll1327 | slr0080 | slr1623 | slr1256 | slr1834 | sll0594 | smr0007 | sll0900 | slr1796 |
| sll1327 | slr0787 | slr0551 | slr1623 | sll1639 | slr1834 | slr0550 | smr0007 | slr0608 | slr1796 |
| sll1327 | sll1852 | sll0145 | slr1623 | slr1834 | slr1899 | sll1058 | smr0007 | slr0652 | slr1796 |
| sll1327 | slr1090 | sll0708 | slr1623 | sll0643 | slr1834 | slr1665 | smr0007 | slr0084 | slr1796 |
| sll0902 | sll1327 | slr0679 | slr1623 | slr1834 | slr1844 | slr0536 | smr0007 | sll1893 | slr1796 |
| sll1327 | slr0661 | slr0722 | slr1623 | sll0459 | slr1834 | slr1874 | smr0007 | slr0500 | slr1796 |
| sll1327 | slr0526 | slr0072 | slr1623 | sll0865 | slr1834 | sll1776 | smr0007 | slr1560 | slr1796 |
| sll1249 | sll1327 | sll1547 | slr1623 | slr0733 | slr1834 | sll0848 | smr0007 | sll1988 | slr1796 |
| sll0892 | sll1327 | sll1234 | slr1623 | sll1459 | slr1834 | sll0897 | smr0007 | slr1289 | slr1796 |
| sll0660 | sll1327 | sll0616 | slr1623 | sll0905 | slr1834 | sll1933 | smr0007 | sll1556 | slr1796 |
| sll1327 | slr1779 | slr1623 | slr2073 | sll0402 | slr1835 | slr0965 | smr0007 | slr1796 | ssl3441 |
| sll1327 | slr0394 | slr1623 | slr1639 | sll0728 | slr1835 | slr1463 | smr0007 | slr0744 | slr1796 |
| sll1327 | slr2047 | sll1108 | slr1623 | sll0336 | slr1835 | sll1098 | smr0007 | slr0974 | slr1796 |
| sll1327 | slr0741 | sll0362 | slr1623 | sll1299 | slr1835 | slr0434 | smr0007 | slr1622 | slr1796 |
| sll1327 | slr1510 | slr0958 | slr1623 | slr1835 | ssl2084 | sll1261 | smr0007 | sll1196 | slr1796 |

|         |         |         |         |         |         |         |         |         |         |
|---------|---------|---------|---------|---------|---------|---------|---------|---------|---------|
| sll1043 | sll1327 | slr1623 | slr1720 | sll2001 | slr1835 | sll1099 | smr0007 | sll0745 | slr1796 |
| sll1327 | slr0400 | sll0179 | slr1623 | sll1430 | slr1835 | slr0752 | smr0007 | sll1815 | slr1796 |
| sll1327 | sll1415 | sll0454 | slr1623 | sll0573 | slr1835 | slr0952 | smr0007 | sll1059 | slr1796 |
| sll1327 | sll1909 | sll1553 | slr1623 | slr1835 | slr1898 | slr1511 | smr0007 | slr1123 | slr1796 |
| sll0373 | sll1327 | slr0638 | slr1623 | sll0080 | slr1835 | sll1605 | smr0007 | sll1760 | slr1796 |
| sll1327 | slr2035 | slr0220 | slr1623 | slr1022 | slr1835 | sll0990 | smr0007 | sll0469 | slr1796 |
| sll1327 | slr2132 | slr0357 | slr1623 | sll1883 | slr1835 | sll1633 | smr0007 | slr1517 | slr1796 |
| sll1327 | slr0922 | sll1362 | slr1623 | slr1133 | slr1835 | slr0018 | smr0007 | sll0869 | slr1796 |
| sll1327 | slr0838 | slr1550 | slr1623 | slr0444 | slr1835 | sll0567 | smr0007 | slr1598 | slr1796 |
| sll1327 | sll1823 | sll1074 | slr1623 | slr1835 | slr2130 | slr0884 | smr0007 | sll0868 | slr1796 |
| sll1056 | sll1327 | slr0649 | slr1623 | sll1669 | slr1835 | sll1342 | smr0007 | slr0994 | slr1796 |
| sll1327 | slr0520 | sll0495 | slr1623 | slr0585 | slr1835 | slr1349 | smr0007 | sll0379 | slr1796 |
| sll0144 | sll1327 | sll1425 | slr1623 | slr1835 | slr2075 | sll0593 | smr0007 | sll1676 | slr1796 |
| sll0467 | sll1327 | sll0502 | slr1623 | slr1835 | slr2076 | sll0220 | smr0007 | sll0927 | slr1796 |
| sll1327 | slr0711 | slr1623 | slr1703 | sll0416 | slr1835 | sll0899 | smr0007 | sll0996 | slr1796 |
| sll0754 | sll1327 | sll0078 | slr1623 | slr0156 | slr1835 | slr1756 | smr0007 | sll0844 | slr1796 |
| sll0569 | sll1327 | slr0557 | slr1623 | slr1641 | slr1835 | sll1085 | smr0007 | sll1615 | slr1796 |
| sll1277 | sll1327 | slr1623 | slr1884 | slr0542 | slr1835 | sll1931 | smr0007 | sll0202 | slr1796 |
| sll1110 | sll1327 | slr1031 | slr1623 | sll0534 | slr1835 | sll0083 | smr0007 | slr0902 | slr1796 |
| sll1327 | sll1865 | slr1623 | slr1793 | slr0165 | slr1835 | slr1755 | smr0007 | sll1144 | slr1796 |
| sll1327 | slr1228 | slr0633 | slr1623 | sll0030 | slr1835 | sll0057 | smr0007 | slr0017 | slr1796 |
| sll1327 | slr0808 | slr1278 | slr1623 | slr0847 | slr1835 | sll0017 | smr0007 | slr1424 | slr1796 |
| sll1327 | slr0082 | slr0783 | slr1623 | slr0553 | slr1835 | sll1185 | smr0007 | slr1423 | slr1796 |
| sll1327 | slr0742 | sll1198 | slr1623 | slr0812 | slr1835 | slr0839 | smr0007 | sll2010 | slr1796 |
| sll0098 | sll1327 | sll0204 | slr1623 | slr1347 | slr1835 | sll1876 | smr0007 | slr0528 | slr1796 |
| sll1327 | slr1646 | sll1750 | slr1623 | slr1348 | slr1835 | sll0900 | smr0007 | slr1351 | slr1796 |
| sll1327 | slr1130 | sll0420 | slr1623 | slr1791 | slr1835 | slr0608 | smr0007 | sll0622 | slr1796 |
| sll1327 | slr0080 | slr1256 | slr1623 | sll0594 | slr1835 | slr0652 | smr0007 | sll0631 | slr1796 |
| sll1327 | slr0551 | sll1639 | slr1623 | slr0550 | slr1835 | slr0084 | smr0007 | slr0787 | slr1796 |
| sll0145 | sll1327 | slr1623 | slr1899 | sll1058 | slr1835 | sll1893 | smr0007 | sll1852 | slr1796 |
| sll0708 | sll1327 | sll0643 | slr1623 | slr1665 | slr1835 | slr0500 | smr0007 | slr1090 | slr1796 |
| sll1327 | slr0679 | slr1623 | slr1844 | slr0536 | slr1835 | slr1560 | smr0007 | sll0902 | slr1796 |
| sll1327 | slr0722 | sll0459 | slr1623 | slr1835 | slr1874 | sll1988 | smr0007 | slr0661 | slr1796 |
| sll1327 | slr0072 | sll0865 | slr1623 | sll1776 | slr1835 | slr1289 | smr0007 | slr0526 | slr1796 |
| sll1327 | sll1547 | slr0733 | slr1623 | sll0848 | slr1835 | sll1556 | smr0007 | sll1249 | slr1796 |
| sll1234 | sll1327 | sll1459 | slr1623 | sll0897 | slr1835 | smr0007 | ssl3441 | sll0892 | slr1796 |
| sll0616 | sll1327 | sll0905 | slr1623 | sll1933 | slr1835 | slr0744 | smr0007 | sll0660 | slr1796 |
| sll1327 | slr2073 | sll0402 | sll1262 | slr0965 | slr1835 | slr0974 | smr0007 | slr1779 | slr1796 |
| sll1327 | slr1639 | sll0728 | sll1262 | slr1463 | slr1835 | slr1622 | smr0007 | slr0394 | slr1796 |
| sll1108 | sll1327 | sll0336 | sll1262 | sll1098 | slr1835 | sll1196 | smr0007 | slr1796 | slr2047 |
| sll0362 | sll1327 | sll1262 | sll1299 | slr0434 | slr1835 | sll0745 | smr0007 | slr0741 | slr1796 |
| sll1327 | slr0958 | sll1262 | ssl2084 | sll1261 | slr1835 | sll1815 | smr0007 | slr1510 | slr1796 |
| sll1327 | slr1720 | sll1262 | sll2001 | sll1099 | slr1835 | sll1059 | smr0007 | sll1043 | slr1796 |
| sll0179 | sll1327 | sll1262 | sll1430 | slr0752 | slr1835 | slr1123 | smr0007 | slr0400 | slr1796 |
| sll0454 | sll1327 | sll0573 | sll1262 | slr0952 | slr1835 | sll1760 | smr0007 | sll1415 | slr1796 |
| sll1327 | sll1553 | sll1262 | slr1898 | slr1511 | slr1835 | sll0469 | smr0007 | sll1909 | slr1796 |
| sll1327 | slr0638 | sll0080 | sll1262 | sll1605 | slr1835 | slr1517 | smr0007 | sll0373 | slr1796 |
| sll1327 | slr0220 | sll1262 | slr1022 | sll0990 | slr1835 | sll0869 | smr0007 | slr1796 | slr2035 |
| sll1327 | slr0357 | sll1262 | sll1883 | sll1633 | slr1835 | slr1598 | smr0007 | slr1796 | slr2132 |
| sll1327 | sll1362 | sll1262 | slr1133 | slr0018 | slr1835 | sll0868 | smr0007 | slr0922 | slr1796 |
| sll1327 | slr1550 | sll1262 | slr0444 | sll0567 | slr1835 | slr0994 | smr0007 | slr0838 | slr1796 |

|         |         |         |         |         |         |         |         |         |         |
|---------|---------|---------|---------|---------|---------|---------|---------|---------|---------|
| sll1074 | sll1327 | sll1262 | slr2130 | slr0884 | slr1835 | sll0379 | smr0007 | sll1823 | slr1796 |
| sll1327 | slr0649 | sll1262 | sll1669 | sll1342 | slr1835 | sll1676 | smr0007 | sll1056 | slr1796 |
| sll0495 | sll1327 | sll1262 | slr0585 | slr1349 | slr1835 | sll0927 | smr0007 | slr0520 | slr1796 |
| sll1327 | sll1425 | sll1262 | slr2075 | sll0593 | slr1835 | sll0996 | smr0007 | sll0144 | slr1796 |
| sll0502 | sll1327 | sll1262 | slr2076 | sll0220 | slr1835 | sll0844 | smr0007 | sll0467 | slr1796 |
| sll1327 | slr1703 | sll0416 | sll1262 | sll0899 | slr1835 | sll1615 | smr0007 | slr0711 | slr1796 |
| sll0078 | sll1327 | sll1262 | slr0156 | slr1756 | slr1835 | sll0202 | smr0007 | sll0754 | slr1796 |
| sll1327 | slr0557 | sll1262 | slr1641 | sll1085 | slr1835 | slr0902 | smr0007 | sll0569 | slr1796 |
| sll1327 | slr1884 | sll1262 | slr0542 | sll1931 | slr1835 | sll1144 | smr0007 | sll1277 | slr1796 |
| sll1327 | slr1031 | sll0534 | sll1262 | sll0083 | slr1835 | slr0017 | smr0007 | sll1110 | slr1796 |
| sll1327 | slr1793 | sll1262 | slr0165 | slr1755 | slr1835 | slr1424 | smr0007 | sll1865 | slr1796 |
| sll1327 | slr0633 | sll0030 | sll1262 | sll0057 | slr1835 | slr1423 | smr0007 | slr1228 | slr1796 |
| sll1327 | slr1278 | sll1262 | slr0847 | sll0017 | slr1835 | sll2010 | smr0007 | slr0808 | slr1796 |
| sll1327 | slr0783 | sll1262 | slr0553 | sll1185 | slr1835 | slr0528 | smr0007 | slr0082 | slr1796 |
| sll1198 | sll1327 | sll1262 | slr0812 | slr0839 | slr1835 | slr1351 | smr0007 | slr0742 | slr1796 |
| sll0204 | sll1327 | sll1262 | slr1347 | sll1876 | slr1835 | sll0622 | smr0007 | sll0098 | slr1796 |
| sll1327 | sll1750 | sll1262 | slr1348 | sll0900 | slr1835 | sll0631 | smr0007 | slr1646 | slr1796 |
| sll0420 | sll1327 | sll1262 | slr1791 | slr0608 | slr1835 | slr0787 | smr0007 | slr1130 | slr1796 |
| sll1327 | slr1256 | sll0594 | sll1262 | slr0652 | slr1835 | sll1852 | smr0007 | slr0080 | slr1796 |
| sll1327 | sll1639 | sll1262 | slr0550 | slr0084 | slr1835 | slr1090 | smr0007 | slr0551 | slr1796 |
| sll1327 | slr1899 | sll1058 | sll1262 | sll1893 | slr1835 | sll0902 | smr0007 | sll0145 | slr1796 |
| sll0643 | sll1327 | sll1262 | slr1665 | slr0500 | slr1835 | slr0661 | smr0007 | sll0708 | slr1796 |
| sll1327 | slr1844 | sll1262 | slr0536 | slr1560 | slr1835 | slr0526 | smr0007 | slr0679 | slr1796 |
| sll0459 | sll1327 | sll1262 | slr1874 | sll1988 | slr1835 | sll1249 | smr0007 | slr0722 | slr1796 |
| sll0865 | sll1327 | sll1262 | sll1776 | slr1289 | slr1835 | sll0892 | smr0007 | slr0072 | slr1796 |
| sll1327 | slr0733 | sll0848 | sll1262 | sll1556 | slr1835 | sll0660 | smr0007 | sll1547 | slr1796 |
| sll1327 | sll1459 | sll0897 | sll1262 | slr1835 | ssl3441 | slr1779 | smr0007 | sll1234 | slr1796 |
| sll0905 | sll1327 | sll1262 | sll1933 | slr0744 | slr1835 | slr0394 | smr0007 | sll0616 | slr1796 |
| sll0402 | ssl2615 | sll1262 | slr0965 | slr0974 | slr1835 | slr2047 | smr0007 | slr1796 | slr2073 |
| sll0728 | ssl2615 | sll1262 | slr1463 | slr1622 | slr1835 | slr0741 | smr0007 | slr1639 | slr1796 |
| sll0336 | ssl2615 | sll1098 | sll1262 | sll1196 | slr1835 | slr1510 | smr0007 | sll1108 | slr1796 |
| sll1299 | ssl2615 | sll1262 | slr0434 | sll0745 | slr1835 | sll1043 | smr0007 | sll0362 | slr1796 |
| ssl2084 | ssl2615 | sll1261 | sll1262 | sll1815 | slr1835 | slr0400 | smr0007 | slr0958 | slr1796 |
| sll2001 | ssl2615 | sll1099 | sll1262 | sll1059 | slr1835 | sll1415 | smr0007 | slr1720 | slr1796 |
| sll1430 | ssl2615 | sll1262 | slr0752 | slr1123 | slr1835 | sll1909 | smr0007 | sll0179 | slr1796 |
| sll0573 | ssl2615 | sll1262 | slr0952 | sll1760 | slr1835 | sll0373 | smr0007 | sll0454 | slr1796 |
| slr1898 | ssl2615 | sll1262 | slr1511 | sll0469 | slr1835 | slr2035 | smr0007 | sll1553 | slr1796 |
| sll0080 | ssl2615 | sll1262 | sll1605 | slr1517 | slr1835 | slr2132 | smr0007 | slr0638 | slr1796 |
| slr1022 | ssl2615 | sll0990 | sll1262 | sll0869 | slr1835 | slr0922 | smr0007 | slr0220 | slr1796 |
| sll1883 | ssl2615 | sll1262 | sll1633 | slr1598 | slr1835 | slr0838 | smr0007 | slr0357 | slr1796 |
| slr1133 | ssl2615 | sll1262 | slr0018 | sll0868 | slr1835 | sll1823 | smr0007 | sll1362 | slr1796 |
| slr0444 | ssl2615 | sll0567 | sll1262 | slr0994 | slr1835 | sll1056 | smr0007 | slr1550 | slr1796 |
| slr2130 | ssl2615 | sll1262 | slr0884 | sll0379 | slr1835 | slr0520 | smr0007 | sll1074 | slr1796 |
| sll1669 | ssl2615 | sll1262 | sll1342 | sll1676 | slr1835 | sll0144 | smr0007 | slr0649 | slr1796 |
| slr0585 | ssl2615 | sll1262 | slr1349 | sll0927 | slr1835 | sll0467 | smr0007 | sll0495 | slr1796 |
| slr2075 | ssl2615 | sll0593 | sll1262 | sll0996 | slr1835 | slr0711 | smr0007 | sll1425 | slr1796 |
| slr2076 | ssl2615 | sll0220 | sll1262 | sll0844 | slr1835 | sll0754 | smr0007 | sll0502 | slr1796 |
| sll0416 | ssl2615 | sll0899 | sll1262 | sll1615 | slr1835 | sll0569 | smr0007 | slr1703 | slr1796 |
| slr0156 | ssl2615 | sll1262 | slr1756 | sll0202 | slr1835 | sll1277 | smr0007 | sll0078 | slr1796 |
| slr1641 | ssl2615 | sll1085 | sll1262 | slr0902 | slr1835 | sll1110 | smr0007 | slr0557 | slr1796 |
| slr0542 | ssl2615 | sll1262 | sll1931 | sll1144 | slr1835 | sll1865 | smr0007 | slr1796 | slr1884 |

|         |         |         |         |         |         |         |         |         |         |
|---------|---------|---------|---------|---------|---------|---------|---------|---------|---------|
| slI0534 | ssl2615 | slI0083 | slI1262 | slr0017 | slr1835 | slr1228 | smr0007 | slr1031 | slr1796 |
| slr0165 | ssl2615 | slI1262 | slr1755 | slr1424 | slr1835 | slr0808 | smr0007 | slr1793 | slr1796 |
| slI0030 | ssl2615 | slI0057 | slI1262 | slr1423 | slr1835 | slr0082 | smr0007 | slr0633 | slr1796 |
| slr0847 | ssl2615 | slI0017 | slI1262 | slI2010 | slr1835 | slr0742 | smr0007 | slr1278 | slr1796 |
| slr0553 | ssl2615 | slI1185 | slI1262 | slr0528 | slr1835 | slI0098 | smr0007 | slr0783 | slr1796 |
| slr0812 | ssl2615 | slI1262 | slr0839 | slr1351 | slr1835 | slr1646 | smr0007 | slI1198 | slr1796 |
| slr1347 | ssl2615 | slI1262 | slI1876 | slI0622 | slr1835 | slr1130 | smr0007 | slI0204 | slr1796 |
| slr1348 | ssl2615 | slI0900 | slI1262 | slI0631 | slr1835 | slr0080 | smr0007 | slI1750 | slr1796 |
| slr1791 | ssl2615 | slI1262 | slr0608 | slr0787 | slr1835 | slr0551 | smr0007 | slI0420 | slr1796 |
| slI0594 | ssl2615 | slI1262 | slr0652 | slI1852 | slr1835 | slI0145 | smr0007 | slr1256 | slr1796 |
| slr0550 | ssl2615 | slI1262 | slr0084 | slr1090 | slr1835 | slI0708 | smr0007 | slI1639 | slr1796 |
| slI1058 | ssl2615 | slI1262 | slI1893 | slI0902 | slr1835 | slr0679 | smr0007 | slr1796 | slr1899 |
| slr1665 | ssl2615 | slI1262 | slr0500 | slr0661 | slr1835 | slr0722 | smr0007 | slI0643 | slr1796 |
| slr0536 | ssl2615 | slI1262 | slr1560 | slr0526 | slr1835 | slr0072 | smr0007 | slr1796 | slr1844 |
| slr1874 | ssl2615 | slI1262 | slI1988 | slI1249 | slr1835 | slI1547 | smr0007 | slI0459 | slr1796 |
| slI1776 | ssl2615 | slI1262 | slr1289 | slI0892 | slr1835 | slI1234 | smr0007 | slI0865 | slr1796 |
| slI0848 | ssl2615 | slI1262 | slI1556 | slI0660 | slr1835 | slI0616 | smr0007 | slr0733 | slr1796 |
| slI0897 | ssl2615 | slI1262 | ssl3441 | slr1779 | slr1835 | slr2073 | smr0007 | slI1459 | slr1796 |
| slI1933 | ssl2615 | slI1262 | slr0744 | slr0394 | slr1835 | slr1639 | smr0007 | slI0905 | slr1796 |
| slr0965 | ssl2615 | slI1262 | slr0974 | slr1835 | slr2047 | slI1108 | smr0007 | slI0402 | slr1949 |
| slr1463 | ssl2615 | slI1262 | slr1622 | slr0741 | slr1835 | slI0362 | smr0007 | slI0728 | slr1949 |
| slI1098 | ssl2615 | slI1196 | slI1262 | slr1510 | slr1835 | slr0958 | smr0007 | slI0336 | slr1949 |
| slr0434 | ssl2615 | slI0745 | slI1262 | slI1043 | slr1835 | slr1720 | smr0007 | slI1299 | slr1949 |
| slI1261 | ssl2615 | slI1262 | slI1815 | slr0400 | slr1835 | slI0179 | smr0007 | slr1949 | ssl2084 |
| slI1099 | ssl2615 | slI1059 | slI1262 | slI1415 | slr1835 | slI0454 | smr0007 | slI2001 | slr1949 |
| slr0752 | ssl2615 | slI1262 | slr1123 | slI1909 | slr1835 | slI1553 | smr0007 | slI1430 | slr1949 |
| slr0952 | ssl2615 | slI1262 | slI1760 | slI0373 | slr1835 | slr0638 | smr0007 | slI0573 | slr1949 |
| slr1511 | ssl2615 | slI0469 | slI1262 | slr1835 | slr2035 | slr0220 | smr0007 | slr1898 | slr1949 |
| slI1605 | ssl2615 | slI1262 | slr1517 | slr1835 | slr2132 | slr0357 | smr0007 | slI0080 | slr1949 |
| slI0990 | ssl2615 | slI0869 | slI1262 | slr0922 | slr1835 | slI1362 | smr0007 | slr1022 | slr1949 |
| slI1633 | ssl2615 | slI1262 | slr1598 | slr0838 | slr1835 | slr1550 | smr0007 | slI1883 | slr1949 |
| slr0018 | ssl2615 | slI0868 | slI1262 | slI1823 | slr1835 | slI1074 | smr0007 | slr1133 | slr1949 |
| slI0567 | ssl2615 | slI1262 | slr0994 | slI1056 | slr1835 | slr0649 | smr0007 | slr0444 | slr1949 |
| slr0884 | ssl2615 | slI0379 | slI1262 | slr0520 | slr1835 | slI0495 | smr0007 | slr1949 | slr2130 |
| slI1342 | ssl2615 | slI1262 | slI1676 | slI0144 | slr1835 | slI1425 | smr0007 | slI1669 | slr1949 |
| slr1349 | ssl2615 | slI0927 | slI1262 | slI0467 | slr1835 | slI0502 | smr0007 | slr0585 | slr1949 |
| slI0593 | ssl2615 | slI0996 | slI1262 | slr0711 | slr1835 | slr1703 | smr0007 | slr1949 | slr2075 |
| slI0220 | ssl2615 | slI0844 | slI1262 | slI0754 | slr1835 | slI0078 | smr0007 | slr1949 | slr2076 |
| slI0899 | ssl2615 | slI1262 | slI1615 | slI0569 | slr1835 | slr0557 | smr0007 | slI0416 | slr1949 |
| slr1756 | ssl2615 | slI0202 | slI1262 | slI1277 | slr1835 | slr1884 | smr0007 | slr0156 | slr1949 |
| slI1085 | ssl2615 | slI1262 | slr0902 | slI1110 | slr1835 | slr1031 | smr0007 | slr1641 | slr1949 |
| slI1931 | ssl2615 | slI1144 | slI1262 | slI1865 | slr1835 | slr1793 | smr0007 | slr0542 | slr1949 |
| slI0083 | ssl2615 | slI1262 | slr0017 | slr1228 | slr1835 | slr0633 | smr0007 | slI0534 | slr1949 |
| slr1755 | ssl2615 | slI1262 | slr1424 | slr0808 | slr1835 | slr1278 | smr0007 | slr0165 | slr1949 |
| slI0057 | ssl2615 | slI1262 | slr1423 | slr0082 | slr1835 | slr0783 | smr0007 | slI0030 | slr1949 |
| slI0017 | ssl2615 | slI1262 | slI2010 | slr0742 | slr1835 | slI1198 | smr0007 | slr0847 | slr1949 |
| slI1185 | ssl2615 | slI1262 | slr0528 | slI0098 | slr1835 | slI0204 | smr0007 | slr0553 | slr1949 |
| slr0839 | ssl2615 | slI1262 | slr1351 | slr1646 | slr1835 | slI1750 | smr0007 | slr0812 | slr1949 |
| slI1876 | ssl2615 | slI0622 | slI1262 | slr1130 | slr1835 | slI0420 | smr0007 | slr1347 | slr1949 |
| slI0900 | ssl2615 | slI0631 | slI1262 | slr0080 | slr1835 | slr1256 | smr0007 | slr1348 | slr1949 |
| slr0608 | ssl2615 | slI1262 | slr0787 | slr0551 | slr1835 | slI1639 | smr0007 | slr1791 | slr1949 |

|         |         |         |         |         |         |         |         |         |         |
|---------|---------|---------|---------|---------|---------|---------|---------|---------|---------|
| slr0652 | ssl2615 | sll1262 | sll1852 | sll0145 | slr1835 | slr1899 | smr0007 | sll0594 | slr1949 |
| slr0084 | ssl2615 | sll1262 | slr1090 | sll0708 | slr1835 | sll0643 | smr0007 | slr0550 | slr1949 |
| sll1893 | ssl2615 | sll0902 | sll1262 | slr0679 | slr1835 | slr1844 | smr0007 | sll1058 | slr1949 |
| slr0500 | ssl2615 | sll1262 | slr0661 | slr0722 | slr1835 | sll0459 | smr0007 | slr1665 | slr1949 |
| slr1560 | ssl2615 | sll1262 | slr0526 | slr0072 | slr1835 | sll0865 | smr0007 | slr0536 | slr1949 |
| sll1988 | ssl2615 | sll1249 | sll1262 | sll1547 | slr1835 | slr0733 | smr0007 | slr1874 | slr1949 |
| slr1289 | ssl2615 | sll0892 | sll1262 | sll1234 | slr1835 | sll1459 | smr0007 | sll1776 | slr1949 |
| sll1556 | ssl2615 | sll0660 | sll1262 | sll0616 | slr1835 | sll0905 | smr0007 | sll0848 | slr1949 |
| ssl2615 | ssl3441 | sll1262 | slr1779 | slr1835 | slr2073 | sll0402 | sml0003 | sll0897 | slr1949 |
| slr0744 | ssl2615 | sll1262 | slr0394 | slr1639 | slr1835 | sll0728 | sml0003 | sll1933 | slr1949 |
| slr0974 | ssl2615 | sll1262 | slr2047 | sll1108 | slr1835 | sll0336 | sml0003 | slr0965 | slr1949 |
| slr1622 | ssl2615 | sll1262 | slr0741 | sll0362 | slr1835 | sll1299 | sml0003 | slr1463 | slr1949 |
| sll1196 | ssl2615 | sll1262 | slr1510 | slr0958 | slr1835 | sml0003 | ssl2084 | sll1098 | slr1949 |
| sll0745 | ssl2615 | sll1043 | sll1262 | slr1720 | slr1835 | sll2001 | sml0003 | slr0434 | slr1949 |
| sll1815 | ssl2615 | sll1262 | slr0400 | sll0179 | slr1835 | sll1430 | sml0003 | sll1261 | slr1949 |
| sll1059 | ssl2615 | sll1262 | sll1415 | sll0454 | slr1835 | sll0573 | sml0003 | sll1099 | slr1949 |
| slr1123 | ssl2615 | sll1262 | sll1909 | sll1553 | slr1835 | slr1898 | sml0003 | slr0752 | slr1949 |
| sll1760 | ssl2615 | sll0373 | sll1262 | slr0638 | slr1835 | sll0080 | sml0003 | slr0952 | slr1949 |
| sll0469 | ssl2615 | sll1262 | slr2035 | slr0220 | slr1835 | slr1022 | sml0003 | slr1511 | slr1949 |
| slr1517 | ssl2615 | sll1262 | slr2132 | slr0357 | slr1835 | sll1883 | sml0003 | sll1605 | slr1949 |
| sll0869 | ssl2615 | sll1262 | slr0922 | sll1362 | slr1835 | slr1133 | sml0003 | sll0990 | slr1949 |
| slr1598 | ssl2615 | sll1262 | slr0838 | slr1550 | slr1835 | slr0444 | sml0003 | sll1633 | slr1949 |
| sll0868 | ssl2615 | sll1262 | sll1823 | sll1074 | slr1835 | slr2130 | sml0003 | slr0018 | slr1949 |
| slr0994 | ssl2615 | sll1056 | sll1262 | slr0649 | slr1835 | sll1669 | sml0003 | sll0567 | slr1949 |
| sll0379 | ssl2615 | sll1262 | slr0520 | sll0495 | slr1835 | slr0585 | sml0003 | slr0884 | slr1949 |
| sll1676 | ssl2615 | sll0144 | sll1262 | sll1425 | slr1835 | slr2075 | sml0003 | sll1342 | slr1949 |
| sll0927 | ssl2615 | sll0467 | sll1262 | sll0502 | slr1835 | slr2076 | sml0003 | slr1349 | slr1949 |
| sll0996 | ssl2615 | sll1262 | slr0711 | slr1703 | slr1835 | sll0416 | sml0003 | sll0593 | slr1949 |
| sll0844 | ssl2615 | sll0754 | sll1262 | sll0078 | slr1835 | slr0156 | sml0003 | sll0220 | slr1949 |
| sll1615 | ssl2615 | sll0569 | sll1262 | slr0557 | slr1835 | slr1641 | sml0003 | sll0899 | slr1949 |
| sll0202 | ssl2615 | sll1262 | sll1277 | slr1835 | slr1884 | slr0542 | sml0003 | slr1756 | slr1949 |
| slr0902 | ssl2615 | sll1110 | sll1262 | slr1031 | slr1835 | sll0534 | sml0003 | sll1085 | slr1949 |
| sll1144 | ssl2615 | sll1262 | sll1865 | slr1793 | slr1835 | slr0165 | sml0003 | sll1931 | slr1949 |
| slr0017 | ssl2615 | sll1262 | slr1228 | slr0633 | slr1835 | sll0030 | sml0003 | sll0083 | slr1949 |
| slr1424 | ssl2615 | sll1262 | slr0808 | slr1278 | slr1835 | slr0847 | sml0003 | slr1755 | slr1949 |
| slr1423 | ssl2615 | sll1262 | slr0082 | slr0783 | slr1835 | slr0553 | sml0003 | sll0057 | slr1949 |
| sll2010 | ssl2615 | sll1262 | slr0742 | sll1198 | slr1835 | slr0812 | sml0003 | sll0017 | slr1949 |
| slr0528 | ssl2615 | sll0098 | sll1262 | sll0204 | slr1835 | slr1347 | sml0003 | sll1185 | slr1949 |
| slr1351 | ssl2615 | sll1262 | slr1646 | sll1750 | slr1835 | slr1348 | sml0003 | slr0839 | slr1949 |
| sll0622 | ssl2615 | sll1262 | slr1130 | sll0420 | slr1835 | slr1791 | sml0003 | sll1876 | slr1949 |
| sll0631 | ssl2615 | sll1262 | slr0080 | slr1256 | slr1835 | sll0594 | sml0003 | sll0900 | slr1949 |
| slr0787 | ssl2615 | sll1262 | slr0551 | sll1639 | slr1835 | slr0550 | sml0003 | slr0608 | slr1949 |
| sll1852 | ssl2615 | sll0145 | sll1262 | slr1835 | slr1899 | sll1058 | sml0003 | slr0652 | slr1949 |
| slr1090 | ssl2615 | sll0708 | sll1262 | sll0643 | slr1835 | slr1665 | sml0003 | slr0084 | slr1949 |
| sll0902 | ssl2615 | sll1262 | slr0679 | slr1835 | slr1844 | slr0536 | sml0003 | sll1893 | slr1949 |
| slr0661 | ssl2615 | sll1262 | slr0722 | sll0459 | slr1835 | slr1874 | sml0003 | slr0500 | slr1949 |
| slr0526 | ssl2615 | sll1262 | slr0072 | sll0865 | slr1835 | sll1776 | sml0003 | slr1560 | slr1949 |
| sll1249 | ssl2615 | sll1262 | sll1547 | slr0733 | slr1835 | sll0848 | sml0003 | sll1988 | slr1949 |
| sll0892 | ssl2615 | sll1234 | sll1262 | sll1459 | slr1835 | sll0897 | sml0003 | slr1289 | slr1949 |
| sll0660 | ssl2615 | sll0616 | sll1262 | sll0905 | slr1835 | sll1933 | sml0003 | sll1556 | slr1949 |
| slr1779 | ssl2615 | sll1262 | slr2073 | sll0402 | ssl0563 | slr0965 | sml0003 | slr1949 | ssl3441 |



|         |         |         |         |         |         |         |         |         |         |
|---------|---------|---------|---------|---------|---------|---------|---------|---------|---------|
| slr0394 | ssl2615 | sll1262 | slr1639 | sll0728 | ssl0563 | slr1463 | sml0003 | slr0744 | slr1949 |
| slr2047 | ssl2615 | sll1108 | sll1262 | sll0336 | ssl0563 | sll1098 | sml0003 | slr0974 | slr1949 |
| slr0741 | ssl2615 | sll0362 | sll1262 | sll1299 | ssl0563 | slr0434 | sml0003 | slr1622 | slr1949 |
| slr1510 | ssl2615 | sll1262 | slr0958 | ssl0563 | ssl2084 | sll1261 | sml0003 | sll1196 | slr1949 |
| sll1043 | ssl2615 | sll1262 | slr1720 | sll2001 | ssl0563 | sll1099 | sml0003 | sll0745 | slr1949 |
| slr0400 | ssl2615 | sll0179 | sll1262 | sll1430 | ssl0563 | slr0752 | sml0003 | sll1815 | slr1949 |
| sll1415 | ssl2615 | sll0454 | sll1262 | sll0573 | ssl0563 | slr0952 | sml0003 | sll1059 | slr1949 |
| sll1909 | ssl2615 | sll1262 | sll1553 | slr1898 | ssl0563 | slr1511 | sml0003 | slr1123 | slr1949 |
| sll0373 | ssl2615 | sll1262 | slr0638 | sll0080 | ssl0563 | sll1605 | sml0003 | sll1760 | slr1949 |
| slr2035 | ssl2615 | sll1262 | slr0220 | slr1022 | ssl0563 | sll0990 | sml0003 | sll0469 | slr1949 |
| slr2132 | ssl2615 | sll1262 | slr0357 | sll1883 | ssl0563 | sll1633 | sml0003 | slr1517 | slr1949 |
| slr0922 | ssl2615 | sll1262 | sll1362 | slr1133 | ssl0563 | slr0018 | sml0003 | sll0869 | slr1949 |
| slr0838 | ssl2615 | sll1262 | slr1550 | slr0444 | ssl0563 | sll0567 | sml0003 | slr1598 | slr1949 |
| sll1823 | ssl2615 | sll1074 | sll1262 | slr2130 | ssl0563 | slr0884 | sml0003 | sll0868 | slr1949 |
| sll1056 | ssl2615 | sll0495 | sll1262 | sll1669 | ssl0563 | sll1342 | sml0003 | slr0994 | slr1949 |
| slr0520 | ssl2615 | sll1262 | sll1425 | slr0585 | ssl0563 | slr1349 | sml0003 | sll0379 | slr1949 |
| sll0144 | ssl2615 | sll0502 | sll1262 | slr2075 | ssl0563 | sll0593 | sml0003 | sll1676 | slr1949 |
| sll0467 | ssl2615 | sll1262 | slr1703 | slr2076 | ssl0563 | sll0220 | sml0003 | sll0927 | slr1949 |
| slr0711 | ssl2615 | sll0078 | sll1262 | sll0416 | ssl0563 | sll0899 | sml0003 | sll0996 | slr1949 |
| sll0754 | ssl2615 | sll1262 | slr0557 | slr0156 | ssl0563 | slr1756 | sml0003 | sll0844 | slr1949 |
| sll0569 | ssl2615 | sll1262 | slr1884 | slr1641 | ssl0563 | sll1085 | sml0003 | sll1615 | slr1949 |
| sll1277 | ssl2615 | sll1262 | slr1031 | slr0542 | ssl0563 | sll1931 | sml0003 | sll0202 | slr1949 |
| sll1110 | ssl2615 | sll1262 | slr1793 | sll0534 | ssl0563 | sll0083 | sml0003 | slr0902 | slr1949 |
| sll1865 | ssl2615 | sll1262 | slr0633 | slr0165 | ssl0563 | slr1755 | sml0003 | sll1144 | slr1949 |
| slr1228 | ssl2615 | sll1262 | slr1278 | sll0030 | ssl0563 | sll0057 | sml0003 | slr0017 | slr1949 |
| slr0808 | ssl2615 | sll1262 | slr0783 | slr0847 | ssl0563 | sll0017 | sml0003 | slr1424 | slr1949 |
| slr0082 | ssl2615 | sll1198 | sll1262 | slr0553 | ssl0563 | sll1185 | sml0003 | slr1423 | slr1949 |
| slr0742 | ssl2615 | sll0204 | sll1262 | slr0812 | ssl0563 | slr0839 | sml0003 | sll2010 | slr1949 |
| sll0098 | ssl2615 | sll1262 | sll1750 | slr1347 | ssl0563 | sll1876 | sml0003 | slr0528 | slr1949 |
| slr1646 | ssl2615 | sll0420 | sll1262 | slr1348 | ssl0563 | sll0900 | sml0003 | slr1351 | slr1949 |
| slr1130 | ssl2615 | sll1262 | slr1256 | slr1791 | ssl0563 | slr0608 | sml0003 | sll0622 | slr1949 |
| slr0080 | ssl2615 | sll1262 | sll1639 | sll0594 | ssl0563 | slr0652 | sml0003 | sll0631 | slr1949 |
| slr0551 | ssl2615 | sll1262 | slr1899 | slr0550 | ssl0563 | slr0084 | sml0003 | slr0787 | slr1949 |
| sll0145 | ssl2615 | sll0643 | sll1262 | sll1058 | ssl0563 | sll1893 | sml0003 | sll1852 | slr1949 |
| sll0708 | ssl2615 | sll1262 | slr1844 | slr1665 | ssl0563 | slr0500 | sml0003 | slr1090 | slr1949 |
| slr0679 | ssl2615 | sll0459 | sll1262 | slr0536 | ssl0563 | slr1560 | sml0003 | sll0902 | slr1949 |
| slr0722 | ssl2615 | sll0865 | sll1262 | slr1874 | ssl0563 | sll1988 | sml0003 | slr0661 | slr1949 |
| slr0072 | ssl2615 | sll1262 | slr0733 | sll1776 | ssl0563 | slr1289 | sml0003 | slr0526 | slr1949 |
| sll1547 | ssl2615 | sll1262 | sll1459 | sll0848 | ssl0563 | sll1556 | sml0003 | sll1249 | slr1949 |
| sll1234 | ssl2615 | sll0905 | sll1262 | sll0897 | ssl0563 | sml0003 | ssl3441 | sll0892 | slr1949 |
| sll0616 | ssl2615 | sll0402 | ssl1690 | sll1933 | ssl0563 | slr0744 | sml0003 | sll0660 | slr1949 |
| slr2073 | ssl2615 | sll0728 | ssl1690 | slr0965 | ssl0563 | slr0974 | sml0003 | slr1779 | slr1949 |
| slr1639 | ssl2615 | sll0336 | ssl1690 | slr1463 | ssl0563 | slr1622 | sml0003 | slr0394 | slr1949 |
| sll1108 | ssl2615 | sll1299 | ssl1690 | sll1098 | ssl0563 | sll1196 | sml0003 | slr1949 | slr2047 |
| sll0362 | ssl2615 | ssl1690 | ssl2084 | slr0434 | ssl0563 | sll0745 | sml0003 | slr0741 | slr1949 |
| slr0958 | ssl2615 | sll2001 | ssl1690 | sll1261 | ssl0563 | sll1815 | sml0003 | slr1510 | slr1949 |
| slr1720 | ssl2615 | sll1430 | ssl1690 | sll1099 | ssl0563 | sll1059 | sml0003 | sll1043 | slr1949 |
| sll0179 | ssl2615 | sll0573 | ssl1690 | slr0752 | ssl0563 | slr1123 | sml0003 | slr0400 | slr1949 |
| sll0454 | ssl2615 | slr1898 | ssl1690 | slr0952 | ssl0563 | sll1760 | sml0003 | sll1415 | slr1949 |
| sll1553 | ssl2615 | sll0080 | ssl1690 | slr1511 | ssl0563 | sll0469 | sml0003 | sll1909 | slr1949 |
| slr0638 | ssl2615 | slr1022 | ssl1690 | sll1605 | ssl0563 | slr1517 | sml0003 | sll0373 | slr1949 |

|         |         |         |         |         |         |         |         |         |         |
|---------|---------|---------|---------|---------|---------|---------|---------|---------|---------|
| slr0220 | ssl2615 | sll1883 | ssl1690 | sll0990 | ssl0563 | sll0869 | sml0003 | slr1949 | slr2035 |
| slr0357 | ssl2615 | slr1133 | ssl1690 | sll1633 | ssl0563 | slr1598 | sml0003 | slr1949 | slr2132 |
| sll1362 | ssl2615 | slr0444 | ssl1690 | slr0018 | ssl0563 | sll0868 | sml0003 | slr0922 | slr1949 |
| slr1550 | ssl2615 | slr2130 | ssl1690 | sll0567 | ssl0563 | slr0994 | sml0003 | slr0838 | slr1949 |
| sll1074 | ssl2615 | sll1669 | ssl1690 | slr0884 | ssl0563 | sll0379 | sml0003 | sll1823 | slr1949 |
| slr0649 | ssl2615 | slr0585 | ssl1690 | sll1342 | ssl0563 | sll1676 | sml0003 | sll1056 | slr1949 |
| sll0495 | ssl2615 | slr2075 | ssl1690 | slr1349 | ssl0563 | sll0927 | sml0003 | slr0520 | slr1949 |
| sll1425 | ssl2615 | slr2076 | ssl1690 | sll0593 | ssl0563 | sll0996 | sml0003 | sll0144 | slr1949 |
| sll0502 | ssl2615 | sll0416 | ssl1690 | sll0220 | ssl0563 | sll0844 | sml0003 | sll0467 | slr1949 |
| slr1703 | ssl2615 | slr0156 | ssl1690 | sll0899 | ssl0563 | sll1615 | sml0003 | slr0711 | slr1949 |
| sll0078 | ssl2615 | slr1641 | ssl1690 | slr1756 | ssl0563 | sll0202 | sml0003 | sll0754 | slr1949 |
| slr0557 | ssl2615 | slr0542 | ssl1690 | sll1085 | ssl0563 | slr0902 | sml0003 | sll0569 | slr1949 |
| slr1884 | ssl2615 | sll0534 | ssl1690 | sll1931 | ssl0563 | sll1144 | sml0003 | sll1277 | slr1949 |
| slr1031 | ssl2615 | slr0165 | ssl1690 | sll0083 | ssl0563 | slr0017 | sml0003 | sll1110 | slr1949 |
| slr1793 | ssl2615 | sll0030 | ssl1690 | slr1755 | ssl0563 | slr1424 | sml0003 | sll1865 | slr1949 |
| slr0633 | ssl2615 | slr0847 | ssl1690 | sll0057 | ssl0563 | slr1423 | sml0003 | slr1228 | slr1949 |
| slr1278 | ssl2615 | slr0553 | ssl1690 | sll0017 | ssl0563 | sll2010 | sml0003 | slr0808 | slr1949 |
| slr0783 | ssl2615 | slr0812 | ssl1690 | sll1185 | ssl0563 | slr0528 | sml0003 | slr0082 | slr1949 |
| sll1198 | ssl2615 | slr1347 | ssl1690 | slr0839 | ssl0563 | slr1351 | sml0003 | slr0742 | slr1949 |
| sll0204 | ssl2615 | slr1348 | ssl1690 | sll1876 | ssl0563 | sll0622 | sml0003 | sll0098 | slr1949 |
| sll1750 | ssl2615 | slr1791 | ssl1690 | sll0900 | ssl0563 | sll0631 | sml0003 | slr1646 | slr1949 |
| sll0420 | ssl2615 | sll0594 | ssl1690 | slr0608 | ssl0563 | slr0787 | sml0003 | slr1130 | slr1949 |
| slr1256 | ssl2615 | slr0550 | ssl1690 | slr0652 | ssl0563 | sll1852 | sml0003 | slr0080 | slr1949 |
| sll1639 | ssl2615 | sll1058 | ssl1690 | slr0084 | ssl0563 | slr1090 | sml0003 | slr0551 | slr1949 |
| slr1899 | ssl2615 | slr1665 | ssl1690 | sll1893 | ssl0563 | sll0902 | sml0003 | sll0145 | slr1949 |
| sll0643 | ssl2615 | slr0536 | ssl1690 | slr0500 | ssl0563 | slr0661 | sml0003 | sll0708 | slr1949 |
| slr1844 | ssl2615 | slr1874 | ssl1690 | slr1560 | ssl0563 | slr0526 | sml0003 | slr0679 | slr1949 |
| sll0459 | ssl2615 | sll1776 | ssl1690 | sll1988 | ssl0563 | sll1249 | sml0003 | slr0722 | slr1949 |
| sll0865 | ssl2615 | sll0848 | ssl1690 | slr1289 | ssl0563 | sll0892 | sml0003 | slr0072 | slr1949 |
| slr0733 | ssl2615 | sll0897 | ssl1690 | sll1556 | ssl0563 | sll0660 | sml0003 | sll1547 | slr1949 |
| sll1459 | ssl2615 | sll1933 | ssl1690 | ssl0563 | ssl3441 | slr1779 | sml0003 | sll1234 | slr1949 |
| sll0905 | ssl2615 | slr0965 | ssl1690 | slr0744 | ssl0563 | slr0394 | sml0003 | sll0616 | slr1949 |
| sll0402 | sll1323 | slr1463 | ssl1690 | slr0974 | ssl0563 | slr2047 | sml0003 | slr1949 | slr2073 |
| sll0728 | sll1323 | sll1098 | ssl1690 | slr1622 | ssl0563 | slr0741 | sml0003 | slr1639 | slr1949 |
| sll0336 | sll1323 | slr0434 | ssl1690 | sll1196 | ssl0563 | slr1510 | sml0003 | sll1108 | slr1949 |
| sll1299 | sll1323 | sll1261 | ssl1690 | sll0745 | ssl0563 | sll1043 | sml0003 | sll0362 | slr1949 |
| sll1323 | ssl2084 | sll1099 | ssl1690 | sll1815 | ssl0563 | slr0400 | sml0003 | slr0958 | slr1949 |
| sll1323 | sll2001 | slr0752 | ssl1690 | sll1059 | ssl0563 | sll1415 | sml0003 | slr1720 | slr1949 |
| sll1323 | sll1430 | slr0952 | ssl1690 | slr1123 | ssl0563 | sll1909 | sml0003 | sll0179 | slr1949 |
| sll0573 | sll1323 | slr1511 | ssl1690 | sll1760 | ssl0563 | sll0373 | sml0003 | sll0454 | slr1949 |
| sll1323 | slr1898 | sll1605 | ssl1690 | sll0469 | ssl0563 | slr2035 | sml0003 | sll1553 | slr1949 |
| sll0080 | sll1323 | sll0990 | ssl1690 | slr1517 | ssl0563 | slr2132 | sml0003 | slr0638 | slr1949 |
| sll1323 | slr1022 | sll1633 | ssl1690 | sll0869 | ssl0563 | slr0922 | sml0003 | slr0220 | slr1949 |
| sll1323 | sll1883 | slr0018 | ssl1690 | slr1598 | ssl0563 | slr0838 | sml0003 | slr0357 | slr1949 |
| sll1323 | slr1133 | sll0567 | ssl1690 | sll0868 | ssl0563 | sll1823 | sml0003 | sll1362 | slr1949 |
| sll1323 | slr0444 | slr0884 | ssl1690 | slr0994 | ssl0563 | sll1056 | sml0003 | slr1550 | slr1949 |
| sll1323 | slr2130 | sll1342 | ssl1690 | sll0379 | ssl0563 | slr0520 | sml0003 | sll1074 | slr1949 |
| sll1323 | sll1669 | slr1349 | ssl1690 | sll1676 | ssl0563 | sll0144 | sml0003 | slr0649 | slr1949 |
| sll1323 | slr0585 | sll0593 | ssl1690 | sll0927 | ssl0563 | sll0467 | sml0003 | sll0495 | slr1949 |
| sll1323 | slr2075 | sll0220 | ssl1690 | sll0996 | ssl0563 | slr0711 | sml0003 | sll1425 | slr1949 |
| sll1323 | slr2076 | sll0899 | ssl1690 | sll0844 | ssl0563 | sll0754 | sml0003 | sll0502 | slr1949 |

|         |         |         |         |         |         |         |         |         |         |
|---------|---------|---------|---------|---------|---------|---------|---------|---------|---------|
| sll0416 | sll1323 | slr1756 | ssl1690 | sll1615 | ssl0563 | sll0569 | sml0003 | slr1703 | slr1949 |
| sll1323 | slr0156 | sll1085 | ssl1690 | sll0202 | ssl0563 | sll1277 | sml0003 | sll0078 | slr1949 |
| sll1323 | slr1641 | sll1931 | ssl1690 | slr0902 | ssl0563 | sll1110 | sml0003 | slr0557 | slr1949 |
| sll1323 | slr0542 | sll0083 | ssl1690 | sll1144 | ssl0563 | sll1865 | sml0003 | slr1884 | slr1949 |
| sll0534 | sll1323 | slr1755 | ssl1690 | slr0017 | ssl0563 | slr1228 | sml0003 | slr1031 | slr1949 |
| sll1323 | slr0165 | sll0057 | ssl1690 | slr1424 | ssl0563 | slr0808 | sml0003 | slr1793 | slr1949 |
| sll0030 | sll1323 | sll0017 | ssl1690 | slr1423 | ssl0563 | slr0082 | sml0003 | slr0633 | slr1949 |
| sll1323 | slr0847 | sll1185 | ssl1690 | sll2010 | ssl0563 | slr0742 | sml0003 | slr1278 | slr1949 |
| sll1323 | slr0553 | slr0839 | ssl1690 | slr0528 | ssl0563 | sll0098 | sml0003 | slr0783 | slr1949 |
| sll1323 | slr0812 | sll1876 | ssl1690 | slr1351 | ssl0563 | slr1646 | sml0003 | sll1198 | slr1949 |
| sll1323 | slr1347 | sll0900 | ssl1690 | sll0622 | ssl0563 | slr1130 | sml0003 | sll0204 | slr1949 |
| sll1323 | slr1348 | slr0608 | ssl1690 | sll0631 | ssl0563 | slr0080 | sml0003 | sll1750 | slr1949 |
| sll1323 | slr1791 | slr0652 | ssl1690 | slr0787 | ssl0563 | slr0551 | sml0003 | sll0420 | slr1949 |
| sll0594 | sll1323 | slr0084 | ssl1690 | sll1852 | ssl0563 | sll0145 | sml0003 | slr1256 | slr1949 |
| sll1323 | slr0550 | sll1893 | ssl1690 | slr1090 | ssl0563 | sll0708 | sml0003 | sll1639 | slr1949 |
| sll1058 | sll1323 | slr0500 | ssl1690 | sll0902 | ssl0563 | slr0679 | sml0003 | slr1899 | slr1949 |
| sll1323 | slr1665 | slr1560 | ssl1690 | slr0661 | ssl0563 | slr0722 | sml0003 | sll0643 | slr1949 |
| sll1323 | slr0536 | sll1988 | ssl1690 | slr0526 | ssl0563 | slr0072 | sml0003 | slr1844 | slr1949 |
| sll1323 | slr1874 | slr1289 | ssl1690 | sll1249 | ssl0563 | sll1547 | sml0003 | sll0459 | slr1949 |
| sll1323 | sll1776 | sll1556 | ssl1690 | sll0892 | ssl0563 | sll1234 | sml0003 | sll0865 | slr1949 |
| sll0848 | sll1323 | ssl1690 | ssl3441 | sll0660 | ssl0563 | sll0616 | sml0003 | slr0733 | slr1949 |
| sll0897 | sll1323 | slr0744 | ssl1690 | slr1779 | ssl0563 | slr2073 | sml0003 | sll1459 | slr1949 |
| sll1323 | sll1933 | slr0974 | ssl1690 | slr0394 | ssl0563 | slr1639 | sml0003 | sll0905 | slr1949 |
| sll1323 | slr0965 | slr1622 | ssl1690 | slr2047 | ssl0563 | sll1108 | sml0003 | sll0402 | ssl2009 |
| sll1323 | slr1463 | sll1196 | ssl1690 | slr0741 | ssl0563 | sll0362 | sml0003 | sll0728 | ssl2009 |
| sll1098 | sll1323 | sll0745 | ssl1690 | slr1510 | ssl0563 | slr0958 | sml0003 | sll0336 | ssl2009 |
| sll1323 | slr0434 | sll1815 | ssl1690 | sll1043 | ssl0563 | slr1720 | sml0003 | sll1299 | ssl2009 |
| sll1261 | sll1323 | sll1059 | ssl1690 | slr0400 | ssl0563 | sll0179 | sml0003 | ssl2009 | ssl2084 |
| sll1099 | sll1323 | slr1123 | ssl1690 | sll1415 | ssl0563 | sll0454 | sml0003 | sll2001 | ssl2009 |
| sll1323 | slr0752 | sll1760 | ssl1690 | sll1909 | ssl0563 | sll1553 | sml0003 | sll1430 | ssl2009 |
| sll1323 | slr0952 | sll0469 | ssl1690 | sll0373 | ssl0563 | slr0638 | sml0003 | sll0573 | ssl2009 |
| sll1323 | slr1511 | slr1517 | ssl1690 | slr2035 | ssl0563 | slr0220 | sml0003 | slr1898 | ssl2009 |
| sll1323 | sll1605 | sll0869 | ssl1690 | slr2132 | ssl0563 | slr0357 | sml0003 | sll0080 | ssl2009 |
| sll0990 | sll1323 | slr1598 | ssl1690 | slr0922 | ssl0563 | sll1362 | sml0003 | slr1022 | ssl2009 |
| sll1323 | sll1633 | sll0868 | ssl1690 | slr0838 | ssl0563 | slr1550 | sml0003 | sll1883 | ssl2009 |
| sll1323 | slr0018 | slr0994 | ssl1690 | sll1823 | ssl0563 | sll1074 | sml0003 | slr1133 | ssl2009 |
| sll0567 | sll1323 | sll0379 | ssl1690 | sll1056 | ssl0563 | slr0649 | sml0003 | slr0444 | ssl2009 |
| sll1323 | slr0884 | sll1676 | ssl1690 | slr0520 | ssl0563 | sll0495 | sml0003 | slr2130 | ssl2009 |
| sll1323 | sll1342 | sll0927 | ssl1690 | sll0144 | ssl0563 | sll1425 | sml0003 | sll1669 | ssl2009 |
| sll1323 | slr1349 | sll0996 | ssl1690 | sll0467 | ssl0563 | sll0502 | sml0003 | slr0585 | ssl2009 |
| sll0593 | sll1323 | sll0844 | ssl1690 | slr0711 | ssl0563 | slr1703 | sml0003 | slr2075 | ssl2009 |
| sll0220 | sll1323 | sll1615 | ssl1690 | sll0754 | ssl0563 | sll0078 | sml0003 | slr2076 | ssl2009 |
| sll0899 | sll1323 | sll0202 | ssl1690 | sll0569 | ssl0563 | slr0557 | sml0003 | sll0416 | ssl2009 |
| sll1323 | slr1756 | slr0902 | ssl1690 | sll1277 | ssl0563 | slr1884 | sml0003 | slr0156 | ssl2009 |
| sll1085 | sll1323 | sll1144 | ssl1690 | sll1110 | ssl0563 | slr1031 | sml0003 | slr1641 | ssl2009 |
| sll1323 | sll1931 | slr0017 | ssl1690 | sll1865 | ssl0563 | slr1793 | sml0003 | slr0542 | ssl2009 |
| sll0083 | sll1323 | slr1424 | ssl1690 | slr1228 | ssl0563 | slr0633 | sml0003 | sll0534 | ssl2009 |
| sll1323 | slr1755 | slr1423 | ssl1690 | slr0808 | ssl0563 | slr1278 | sml0003 | slr0165 | ssl2009 |
| sll0057 | sll1323 | sll2010 | ssl1690 | slr0082 | ssl0563 | slr0783 | sml0003 | sll0030 | ssl2009 |
| sll0017 | sll1323 | slr0528 | ssl1690 | slr0742 | ssl0563 | sll1198 | sml0003 | slr0847 | ssl2009 |
| sll1185 | sll1323 | slr1351 | ssl1690 | sll0098 | ssl0563 | sll0204 | sml0003 | slr0553 | ssl2009 |

|         |         |         |         |         |         |         |         |         |         |
|---------|---------|---------|---------|---------|---------|---------|---------|---------|---------|
| sll1323 | slr0839 | sll0622 | ssl1690 | slr1646 | ssl0563 | sll1750 | sml0003 | slr0812 | ssl2009 |
| sll1323 | sll1876 | sll0631 | ssl1690 | slr1130 | ssl0563 | sll0420 | sml0003 | slr1347 | ssl2009 |
| sll0900 | sll1323 | slr0787 | ssl1690 | slr0080 | ssl0563 | slr1256 | sml0003 | slr1348 | ssl2009 |
| sll1323 | slr0608 | sll1852 | ssl1690 | slr0551 | ssl0563 | sll1639 | sml0003 | slr1791 | ssl2009 |
| sll1323 | slr0652 | slr1090 | ssl1690 | sll0145 | ssl0563 | slr1899 | sml0003 | sll0594 | ssl2009 |
| sll1323 | slr0084 | sll0902 | ssl1690 | sll0708 | ssl0563 | sll0643 | sml0003 | slr0550 | ssl2009 |
| sll1323 | sll1893 | slr0661 | ssl1690 | slr0679 | ssl0563 | slr1844 | sml0003 | sll1058 | ssl2009 |
| sll1323 | slr0500 | slr0526 | ssl1690 | slr0722 | ssl0563 | sll0459 | sml0003 | slr1665 | ssl2009 |
| sll1323 | slr1560 | sll1249 | ssl1690 | slr0072 | ssl0563 | sll0865 | sml0003 | slr0536 | ssl2009 |
| sll1323 | sll1988 | sll0892 | ssl1690 | sll1547 | ssl0563 | slr0733 | sml0003 | slr1874 | ssl2009 |
| sll1323 | slr1289 | sll0660 | ssl1690 | sll1234 | ssl0563 | sll1459 | sml0003 | sll1776 | ssl2009 |
| sll1323 | sll1556 | slr1779 | ssl1690 | sll0616 | ssl0563 | sll0905 | sml0003 | sll0848 | ssl2009 |
| sll1323 | ssl3441 | slr0394 | ssl1690 | slr2073 | ssl0563 | sll0402 | smr0009 | sll0897 | ssl2009 |
| sll1323 | slr0744 | slr2047 | ssl1690 | slr1639 | ssl0563 | sll0728 | smr0009 | sll1933 | ssl2009 |
| sll1323 | slr0974 | slr0741 | ssl1690 | sll1108 | ssl0563 | sll0336 | smr0009 | slr0965 | ssl2009 |
| sll1323 | slr1622 | slr1510 | ssl1690 | sll0362 | ssl0563 | sll1299 | smr0009 | slr1463 | ssl2009 |
| sll1196 | sll1323 | sll1043 | ssl1690 | slr0958 | ssl0563 | smr0009 | ssl2084 | sll1098 | ssl2009 |
| sll0745 | sll1323 | slr0400 | ssl1690 | slr1720 | ssl0563 | sll2001 | smr0009 | slr0434 | ssl2009 |
| sll1323 | sll1815 | sll1415 | ssl1690 | sll0179 | ssl0563 | sll1430 | smr0009 | sll1261 | ssl2009 |
| sll1059 | sll1323 | sll1909 | ssl1690 | sll0454 | ssl0563 | sll0573 | smr0009 | sll1099 | ssl2009 |
| sll1323 | slr1123 | sll0373 | ssl1690 | sll1553 | ssl0563 | slr1898 | smr0009 | slr0752 | ssl2009 |
| sll1323 | sll1760 | slr2035 | ssl1690 | slr0638 | ssl0563 | sll0080 | smr0009 | slr0952 | ssl2009 |
| sll0469 | sll1323 | slr2132 | ssl1690 | slr0220 | ssl0563 | slr1022 | smr0009 | slr1511 | ssl2009 |
| sll1323 | slr1517 | slr0922 | ssl1690 | slr0357 | ssl0563 | sll1883 | smr0009 | sll1605 | ssl2009 |
| sll0869 | sll1323 | slr0838 | ssl1690 | sll1362 | ssl0563 | slr1133 | smr0009 | sll0990 | ssl2009 |
| sll1323 | slr1598 | sll1823 | ssl1690 | slr1550 | ssl0563 | slr0444 | smr0009 | sll1633 | ssl2009 |
| sll0868 | sll1323 | sll1056 | ssl1690 | sll1074 | ssl0563 | slr2130 | smr0009 | slr0018 | ssl2009 |
| sll1323 | slr0994 | slr0520 | ssl1690 | slr0649 | ssl0563 | sll1669 | smr0009 | sll0567 | ssl2009 |
| sll0379 | sll1323 | sll0144 | ssl1690 | sll0495 | ssl0563 | slr0585 | smr0009 | slr0884 | ssl2009 |
| sll1323 | sll1676 | sll0467 | ssl1690 | sll1425 | ssl0563 | slr2075 | smr0009 | sll1342 | ssl2009 |
| sll0927 | sll1323 | slr0711 | ssl1690 | sll0502 | ssl0563 | slr2076 | smr0009 | slr1349 | ssl2009 |
| sll0996 | sll1323 | sll0754 | ssl1690 | slr1703 | ssl0563 | sll0416 | smr0009 | sll0593 | ssl2009 |
| sll0844 | sll1323 | sll0569 | ssl1690 | sll0078 | ssl0563 | slr0156 | smr0009 | sll0220 | ssl2009 |
| sll1323 | sll1615 | sll1277 | ssl1690 | slr0557 | ssl0563 | slr1641 | smr0009 | sll0899 | ssl2009 |
| sll0202 | sll1323 | sll1110 | ssl1690 | slr1884 | ssl0563 | slr0542 | smr0009 | slr1756 | ssl2009 |
| sll1323 | slr0902 | sll1865 | ssl1690 | slr1031 | ssl0563 | sll0534 | smr0009 | sll1085 | ssl2009 |
| sll1144 | sll1323 | slr1228 | ssl1690 | slr1793 | ssl0563 | slr0165 | smr0009 | sll1931 | ssl2009 |
| sll1323 | slr0017 | slr0808 | ssl1690 | slr0633 | ssl0563 | sll0030 | smr0009 | sll0083 | ssl2009 |
| sll1323 | slr1424 | slr0082 | ssl1690 | slr1278 | ssl0563 | slr0847 | smr0009 | slr1755 | ssl2009 |
| sll1323 | slr1423 | slr0742 | ssl1690 | slr0783 | ssl0563 | slr0553 | smr0009 | sll0057 | ssl2009 |
| sll1323 | sll2010 | sll0098 | ssl1690 | sll1198 | ssl0563 | slr0812 | smr0009 | sll0017 | ssl2009 |
| sll1323 | slr0528 | slr1646 | ssl1690 | sll0204 | ssl0563 | slr1347 | smr0009 | sll1185 | ssl2009 |
| sll1323 | slr1351 | slr1130 | ssl1690 | sll1750 | ssl0563 | slr1348 | smr0009 | slr0839 | ssl2009 |
| sll0622 | sll1323 | slr0080 | ssl1690 | sll0420 | ssl0563 | slr1791 | smr0009 | sll1876 | ssl2009 |
| sll0631 | sll1323 | slr0551 | ssl1690 | slr1256 | ssl0563 | sll0594 | smr0009 | sll0900 | ssl2009 |
| sll1323 | slr0787 | sll0145 | ssl1690 | sll1639 | ssl0563 | slr0550 | smr0009 | slr0608 | ssl2009 |
| sll1323 | sll1852 | sll0708 | ssl1690 | slr1899 | ssl0563 | sll1058 | smr0009 | slr0652 | ssl2009 |
| sll1323 | slr1090 | slr0679 | ssl1690 | sll0643 | ssl0563 | slr1665 | smr0009 | slr0084 | ssl2009 |
| sll0902 | sll1323 | slr0722 | ssl1690 | slr1844 | ssl0563 | slr0536 | smr0009 | sll1893 | ssl2009 |
| sll1323 | slr0661 | slr0072 | ssl1690 | sll0459 | ssl0563 | slr1874 | smr0009 | slr0500 | ssl2009 |
| sll1323 | slr0526 | sll1547 | ssl1690 | sll0865 | ssl0563 | sll1776 | smr0009 | slr1560 | ssl2009 |

|         |         |         |         |         |         |         |         |         |         |
|---------|---------|---------|---------|---------|---------|---------|---------|---------|---------|
| sll1249 | sll1323 | sll1234 | ssl1690 | slr0733 | ssl0563 | sll0848 | smr0009 | sll1988 | ssl2009 |
| sll0892 | sll1323 | sll0616 | ssl1690 | sll1459 | ssl0563 | sll0897 | smr0009 | slr1289 | ssl2009 |
| sll0660 | sll1323 | slr2073 | ssl1690 | sll0905 | ssl0563 | sll1933 | smr0009 | sll1556 | ssl2009 |
| sll1323 | slr1779 | slr1639 | ssl1690 | sll0402 | ssr2831 | slr0965 | smr0009 | ssl2009 | ssl3441 |
| sll1323 | slr0394 | sll1108 | ssl1690 | sll0728 | ssr2831 | slr1463 | smr0009 | slr0744 | ssl2009 |
| sll1323 | slr2047 | sll0362 | ssl1690 | sll0336 | ssr2831 | sll1098 | smr0009 | slr0974 | ssl2009 |
| sll1323 | slr0741 | slr0958 | ssl1690 | sll1299 | ssr2831 | slr0434 | smr0009 | slr1622 | ssl2009 |
| sll1323 | slr1510 | slr1720 | ssl1690 | ssl2084 | ssr2831 | sll1261 | smr0009 | sll1196 | ssl2009 |
| sll1043 | sll1323 | sll0179 | ssl1690 | sll2001 | ssr2831 | sll1099 | smr0009 | sll0745 | ssl2009 |
| sll1323 | slr0400 | sll0454 | ssl1690 | sll1430 | ssr2831 | slr0752 | smr0009 | sll1815 | ssl2009 |
| sll1323 | sll1415 | sll1553 | ssl1690 | sll0573 | ssr2831 | slr0952 | smr0009 | sll1059 | ssl2009 |
| sll1323 | sll1909 | slr0638 | ssl1690 | slr1898 | ssr2831 | slr1511 | smr0009 | slr1123 | ssl2009 |
| sll0373 | sll1323 | slr0220 | ssl1690 | sll0080 | ssr2831 | sll1605 | smr0009 | sll1760 | ssl2009 |
| sll1323 | slr2035 | slr0357 | ssl1690 | slr1022 | ssr2831 | sll0990 | smr0009 | sll0469 | ssl2009 |
| sll1323 | slr2132 | sll1362 | ssl1690 | sll1883 | ssr2831 | sll1633 | smr0009 | slr1517 | ssl2009 |
| sll1323 | slr0922 | slr1550 | ssl1690 | slr1133 | ssr2831 | slr0018 | smr0009 | sll0869 | ssl2009 |
| sll1323 | slr0838 | sll1074 | ssl1690 | slr0444 | ssr2831 | sll0567 | smr0009 | slr1598 | ssl2009 |
| sll1323 | sll1823 | slr0649 | ssl1690 | slr2130 | ssr2831 | slr0884 | smr0009 | sll0868 | ssl2009 |
| sll1056 | sll1323 | sll0495 | ssl1690 | sll1669 | ssr2831 | sll1342 | smr0009 | slr0994 | ssl2009 |
| sll1323 | slr0520 | sll1425 | ssl1690 | slr0585 | ssr2831 | slr1349 | smr0009 | sll0379 | ssl2009 |
| sll0144 | sll1323 | sll0502 | ssl1690 | slr2075 | ssr2831 | sll0593 | smr0009 | sll1676 | ssl2009 |
| sll0467 | sll1323 | slr1703 | ssl1690 | slr2076 | ssr2831 | sll0220 | smr0009 | sll0927 | ssl2009 |
| sll1323 | slr0711 | sll0078 | ssl1690 | sll0416 | ssr2831 | sll0899 | smr0009 | sll0996 | ssl2009 |
| sll0754 | sll1323 | slr0557 | ssl1690 | slr0156 | ssr2831 | slr1756 | smr0009 | sll0844 | ssl2009 |
| sll0569 | sll1323 | slr1884 | ssl1690 | slr1641 | ssr2831 | sll1085 | smr0009 | sll1615 | ssl2009 |
| sll1277 | sll1323 | slr1031 | ssl1690 | slr0542 | ssr2831 | sll1931 | smr0009 | sll0202 | ssl2009 |
| sll1110 | sll1323 | slr1793 | ssl1690 | sll0534 | ssr2831 | sll0083 | smr0009 | slr0902 | ssl2009 |
| sll1323 | sll1865 | slr0633 | ssl1690 | slr0165 | ssr2831 | slr1755 | smr0009 | sll1144 | ssl2009 |
| sll1323 | slr1228 | slr1278 | ssl1690 | sll0030 | ssr2831 | sll0057 | smr0009 | slr0017 | ssl2009 |
| sll1323 | slr0808 | slr0783 | ssl1690 | slr0847 | ssr2831 | sll0017 | smr0009 | slr1424 | ssl2009 |
| sll1323 | slr0082 | sll1198 | ssl1690 | slr0553 | ssr2831 | sll1185 | smr0009 | slr1423 | ssl2009 |
| sll1323 | slr0742 | sll0204 | ssl1690 | slr0812 | ssr2831 | slr0839 | smr0009 | sll2010 | ssl2009 |
| sll0098 | sll1323 | sll1750 | ssl1690 | slr1347 | ssr2831 | sll1876 | smr0009 | slr0528 | ssl2009 |
| sll1323 | slr1646 | sll0420 | ssl1690 | slr1348 | ssr2831 | sll0900 | smr0009 | slr1351 | ssl2009 |
| sll1323 | slr1130 | slr1256 | ssl1690 | slr1791 | ssr2831 | slr0608 | smr0009 | sll0622 | ssl2009 |
| sll1323 | slr0080 | sll1639 | ssl1690 | sll0594 | ssr2831 | slr0652 | smr0009 | sll0631 | ssl2009 |
| sll1323 | slr0551 | slr1899 | ssl1690 | slr0550 | ssr2831 | slr0084 | smr0009 | slr0787 | ssl2009 |
| sll0145 | sll1323 | sll0643 | ssl1690 | sll1058 | ssr2831 | sll1893 | smr0009 | sll1852 | ssl2009 |
| sll0708 | sll1323 | slr1844 | ssl1690 | slr1665 | ssr2831 | slr0500 | smr0009 | slr1090 | ssl2009 |
| sll1323 | slr0722 | sll0459 | ssl1690 | slr0536 | ssr2831 | slr1560 | smr0009 | sll0902 | ssl2009 |
| sll1323 | slr0072 | sll0865 | ssl1690 | slr1874 | ssr2831 | sll1988 | smr0009 | slr0661 | ssl2009 |
| sll1323 | sll1547 | slr0733 | ssl1690 | sll1776 | ssr2831 | slr1289 | smr0009 | slr0526 | ssl2009 |
| sll1234 | sll1323 | sll1459 | ssl1690 | sll0848 | ssr2831 | sll1556 | smr0009 | sll1249 | ssl2009 |
| sll0616 | sll1323 | sll0905 | ssl1690 | sll0897 | ssr2831 | smr0009 | ssl3441 | sll0892 | ssl2009 |
| sll1323 | slr2073 | sll0402 | sll0519 | sll1933 | ssr2831 | slr0744 | smr0009 | sll0660 | ssl2009 |
| sll1323 | slr1639 | sll0519 | sll0728 | slr0965 | ssr2831 | slr0974 | smr0009 | slr1779 | ssl2009 |
| sll1108 | sll1323 | sll0336 | sll0519 | slr1463 | ssr2831 | slr1622 | smr0009 | slr0394 | ssl2009 |
| sll0362 | sll1323 | sll0519 | sll1299 | sll1098 | ssr2831 | sll1196 | smr0009 | slr2047 | ssl2009 |
| sll1323 | slr0958 | sll0519 | ssl2084 | slr0434 | ssr2831 | sll0745 | smr0009 | slr0741 | ssl2009 |
| sll1323 | slr1720 | sll0519 | sll2001 | sll1261 | ssr2831 | sll1815 | smr0009 | slr1510 | ssl2009 |
| sll0179 | sll1323 | sll0519 | sll1430 | sll1099 | ssr2831 | sll1059 | smr0009 | sll1043 | ssl2009 |

|         |         |         |         |         |         |         |         |         |         |
|---------|---------|---------|---------|---------|---------|---------|---------|---------|---------|
| slI0454 | slI1323 | slI0519 | slI0573 | slr0752 | ssr2831 | slr1123 | smr0009 | slr0400 | ssl2009 |
| slI1323 | slI1553 | slI0519 | slr1898 | slr0952 | ssr2831 | slI1760 | smr0009 | slI1415 | ssl2009 |
| slI1323 | slr0638 | slI0080 | slI0519 | slr1511 | ssr2831 | slI0469 | smr0009 | slI1909 | ssl2009 |
| slI1323 | slr0220 | slI0519 | slr1022 | slI1605 | ssr2831 | slr1517 | smr0009 | slI0373 | ssl2009 |
| slI1323 | slr0357 | slI0519 | slI1883 | slI0990 | ssr2831 | slI0869 | smr0009 | slr2035 | ssl2009 |
| slI1323 | slI1362 | slI0519 | slr1133 | slI1633 | ssr2831 | slr1598 | smr0009 | slr2132 | ssl2009 |
| slI1323 | slr1550 | slI0519 | slr0444 | slr0018 | ssr2831 | slI0868 | smr0009 | slr0922 | ssl2009 |
| slI1074 | slI1323 | slI0519 | slr2130 | slI0567 | ssr2831 | slr0994 | smr0009 | slr0838 | ssl2009 |
| slI1323 | slr0649 | slI0519 | slI1669 | slr0884 | ssr2831 | slI0379 | smr0009 | slI1823 | ssl2009 |
| slI0495 | slI1323 | slI0519 | slr0585 | slI1342 | ssr2831 | slI1676 | smr0009 | slI1056 | ssl2009 |
| slI1323 | slI1425 | slI0519 | slr2075 | slr1349 | ssr2831 | slI0927 | smr0009 | slr0520 | ssl2009 |
| slI0502 | slI1323 | slI0519 | slr2076 | slI0593 | ssr2831 | slI0996 | smr0009 | slI0144 | ssl2009 |
| slI1323 | slr1703 | slI0416 | slI0519 | slI0220 | ssr2831 | slI0844 | smr0009 | slI0467 | ssl2009 |
| slI0078 | slI1323 | slI0519 | slr0156 | slI0899 | ssr2831 | slI1615 | smr0009 | slr0711 | ssl2009 |
| slI1323 | slr0557 | slI0519 | slr1641 | slr1756 | ssr2831 | slI0202 | smr0009 | slI0754 | ssl2009 |
| slI1323 | slr1884 | slI0519 | slr0542 | slI1085 | ssr2831 | slr0902 | smr0009 | slI0569 | ssl2009 |
| slI1323 | slr1031 | slI0519 | slI0534 | slI1931 | ssr2831 | slI1144 | smr0009 | slI1277 | ssl2009 |
| slI1323 | slr1793 | slI0519 | slr0165 | slI0083 | ssr2831 | slr0017 | smr0009 | slI1110 | ssl2009 |
| slI1323 | slr0633 | slI0030 | slI0519 | slr1755 | ssr2831 | slr1424 | smr0009 | slI1865 | ssl2009 |
| slI1323 | slr1278 | slI0519 | slr0847 | slI0057 | ssr2831 | slr1423 | smr0009 | slr1228 | ssl2009 |
| slI1323 | slr0783 | slI0519 | slr0553 | slI0017 | ssr2831 | slI2010 | smr0009 | slr0808 | ssl2009 |
| slI1198 | slI1323 | slI0519 | slr0812 | slI1185 | ssr2831 | slr0528 | smr0009 | slr0082 | ssl2009 |
| slI0204 | slI1323 | slI0519 | slr1347 | slr0839 | ssr2831 | slr1351 | smr0009 | slr0742 | ssl2009 |
| slI1323 | slI1750 | slI0519 | slr1348 | slI1876 | ssr2831 | slI0622 | smr0009 | slI0098 | ssl2009 |
| slI0420 | slI1323 | slI0519 | slr1791 | slI0900 | ssr2831 | slI0631 | smr0009 | slr1646 | ssl2009 |
| slI1323 | slr1256 | slI0519 | slI0594 | slr0608 | ssr2831 | slr0787 | smr0009 | slr1130 | ssl2009 |
| slI1323 | slI1639 | slI0519 | slr0550 | slr0652 | ssr2831 | slI1852 | smr0009 | slr0080 | ssl2009 |
| slI1323 | slr1899 | slI0519 | slI1058 | slr0084 | ssr2831 | slr1090 | smr0009 | slr0551 | ssl2009 |
| slI0643 | slI1323 | slI0519 | slr1665 | slI1893 | ssr2831 | slI0902 | smr0009 | slI0145 | ssl2009 |
| slI1323 | slr1844 | slI0519 | slr0536 | slr0500 | ssr2831 | slr0661 | smr0009 | slI0708 | ssl2009 |
| slI0459 | slI1323 | slI0519 | slr1874 | slr1560 | ssr2831 | slr0526 | smr0009 | slr0679 | ssl2009 |
| slI0865 | slI1323 | slI0519 | slI1776 | slI1988 | ssr2831 | slI1249 | smr0009 | slr0722 | ssl2009 |
| slI1323 | slr0733 | slI0519 | slI0848 | slr1289 | ssr2831 | slI0892 | smr0009 | slr0072 | ssl2009 |
| slI1323 | slI1459 | slI0519 | slI0897 | slI1556 | ssr2831 | slI0660 | smr0009 | slI1547 | ssl2009 |
| slI0905 | slI1323 | slI0519 | slI1933 | ssI3441 | ssr2831 | slr1779 | smr0009 | slI1234 | ssl2009 |
| slI0402 | slr2087 | slI0519 | slr0965 | slr0744 | ssr2831 | slr0394 | smr0009 | slI0616 | ssl2009 |
| slI0728 | slr2087 | slI0519 | slr1463 | slr0974 | ssr2831 | slr2047 | smr0009 | slr2073 | ssl2009 |
| slI0336 | slr2087 | slI0519 | slI1098 | slr1622 | ssr2831 | slr0741 | smr0009 | slr1639 | ssl2009 |
| slI1299 | slr2087 | slI0519 | slr0434 | slI1196 | ssr2831 | slr1510 | smr0009 | slI1108 | ssl2009 |
| slr2087 | ssl2084 | slI0519 | slI1261 | slI0745 | ssr2831 | slI1043 | smr0009 | slI0362 | ssl2009 |
| slI2001 | slr2087 | slI0519 | slI1099 | slI1815 | ssr2831 | slr0400 | smr0009 | slr0958 | ssl2009 |
| slI1430 | slr2087 | slI0519 | slr0752 | slI1059 | ssr2831 | slI1415 | smr0009 | slr1720 | ssl2009 |
| slI0573 | slr2087 | slI0519 | slr0952 | slr1123 | ssr2831 | slI1909 | smr0009 | slI0179 | ssl2009 |
| slr1898 | slr2087 | slI0519 | slr1511 | slI1760 | ssr2831 | slI0373 | smr0009 | slI0454 | ssl2009 |
| slI0080 | slr2087 | slI0519 | slI1605 | slI0469 | ssr2831 | slr2035 | smr0009 | slI1553 | ssl2009 |
| slr1022 | slr2087 | slI0519 | slI0990 | slr1517 | ssr2831 | slr2132 | smr0009 | slr0638 | ssl2009 |
| slI1883 | slr2087 | slI0519 | slI1633 | slI0869 | ssr2831 | slr0922 | smr0009 | slr0220 | ssl2009 |
| slr1133 | slr2087 | slI0519 | slr0018 | slr1598 | ssr2831 | slr0838 | smr0009 | slr0357 | ssl2009 |
| slr0444 | slr2087 | slI0519 | slI0567 | slI0868 | ssr2831 | slI1823 | smr0009 | slI1362 | ssl2009 |
| slr2087 | slr2130 | slI0519 | slr0884 | slr0994 | ssr2831 | slI1056 | smr0009 | slr1550 | ssl2009 |
| slI1669 | slr2087 | slI0519 | slI1342 | slI0379 | ssr2831 | slr0520 | smr0009 | slI1074 | ssl2009 |

|         |         |         |         |         |         |         |         |         |         |
|---------|---------|---------|---------|---------|---------|---------|---------|---------|---------|
| slr0585 | slr2087 | sll0519 | slr1349 | sll1676 | ssr2831 | sll0144 | smr0009 | slr0649 | ssl2009 |
| slr2075 | slr2087 | sll0519 | sll0593 | sll0927 | ssr2831 | sll0467 | smr0009 | sll0495 | ssl2009 |
| slr2076 | slr2087 | sll0220 | sll0519 | sll0996 | ssr2831 | slr0711 | smr0009 | sll1425 | ssl2009 |
| sll0416 | slr2087 | sll0519 | sll0899 | sll0844 | ssr2831 | sll0754 | smr0009 | sll0502 | ssl2009 |
| slr0156 | slr2087 | sll0519 | slr1756 | sll1615 | ssr2831 | sll0569 | smr0009 | slr1703 | ssl2009 |
| slr1641 | slr2087 | sll0519 | sll1085 | sll0202 | ssr2831 | sll1277 | smr0009 | sll0078 | ssl2009 |
| slr0542 | slr2087 | sll0519 | sll1931 | slr0902 | ssr2831 | sll1110 | smr0009 | slr0557 | ssl2009 |
| sll0534 | slr2087 | sll0083 | sll0519 | sll1144 | ssr2831 | sll1865 | smr0009 | slr1884 | ssl2009 |
| slr0165 | slr2087 | sll0519 | slr1755 | slr0017 | ssr2831 | slr1228 | smr0009 | slr1031 | ssl2009 |
| sll0030 | slr2087 | sll0057 | sll0519 | slr1424 | ssr2831 | slr0808 | smr0009 | slr1793 | ssl2009 |
| slr0847 | slr2087 | sll0017 | sll0519 | slr1423 | ssr2831 | slr0082 | smr0009 | slr0633 | ssl2009 |
| slr0553 | slr2087 | sll0519 | sll1185 | sll2010 | ssr2831 | slr0742 | smr0009 | slr1278 | ssl2009 |
| slr0812 | slr2087 | sll0519 | slr0839 | slr0528 | ssr2831 | sll0098 | smr0009 | slr0783 | ssl2009 |
| slr1347 | slr2087 | sll0519 | sll1876 | slr1351 | ssr2831 | slr1646 | smr0009 | sll1198 | ssl2009 |
| slr1348 | slr2087 | sll0519 | sll0900 | sll0622 | ssr2831 | slr1130 | smr0009 | sll0204 | ssl2009 |
| slr1791 | slr2087 | sll0519 | slr0608 | sll0631 | ssr2831 | slr0080 | smr0009 | sll1750 | ssl2009 |
| sll0594 | slr2087 | sll0519 | slr0652 | slr0787 | ssr2831 | slr0551 | smr0009 | sll0420 | ssl2009 |
| slr0550 | slr2087 | sll0519 | slr0084 | sll1852 | ssr2831 | sll0145 | smr0009 | slr1256 | ssl2009 |
| sll1058 | slr2087 | sll0519 | sll1893 | slr1090 | ssr2831 | sll0708 | smr0009 | sll1639 | ssl2009 |
| slr1665 | slr2087 | sll0519 | slr0500 | sll0902 | ssr2831 | slr0679 | smr0009 | slr1899 | ssl2009 |
| slr0536 | slr2087 | sll0519 | slr1560 | slr0661 | ssr2831 | slr0722 | smr0009 | sll0643 | ssl2009 |
| slr1874 | slr2087 | sll0519 | sll1988 | slr0526 | ssr2831 | slr0072 | smr0009 | slr1844 | ssl2009 |
| sll1776 | slr2087 | sll0519 | slr1289 | sll1249 | ssr2831 | sll1547 | smr0009 | sll0459 | ssl2009 |
| sll0848 | slr2087 | sll0519 | sll1556 | sll0892 | ssr2831 | sll1234 | smr0009 | sll0865 | ssl2009 |
| sll0897 | slr2087 | sll0519 | ssl3441 | sll0660 | ssr2831 | sll0616 | smr0009 | slr0733 | ssl2009 |
| sll1933 | slr2087 | sll0519 | slr0744 | slr1779 | ssr2831 | slr2073 | smr0009 | sll1459 | ssl2009 |
| slr0965 | slr2087 | sll0519 | slr0974 | slr0394 | ssr2831 | slr1639 | smr0009 | sll0905 | ssl2009 |
| slr1463 | slr2087 | sll0519 | slr1622 | slr2047 | ssr2831 | sll1108 | smr0009 | sll0402 | ssr2422 |
| sll1098 | slr2087 | sll0519 | sll1196 | slr0741 | ssr2831 | sll0362 | smr0009 | sll0728 | ssr2422 |
| slr0434 | slr2087 | sll0519 | sll0745 | slr1510 | ssr2831 | slr0958 | smr0009 | sll0336 | ssr2422 |
| sll1261 | slr2087 | sll0519 | sll1815 | sll1043 | ssr2831 | slr1720 | smr0009 | sll1299 | ssr2422 |
| sll1099 | slr2087 | sll0519 | sll1059 | slr0400 | ssr2831 | sll0179 | smr0009 | ssl2084 | ssr2422 |
| slr0752 | slr2087 | sll0519 | slr1123 | sll1415 | ssr2831 | sll0454 | smr0009 | sll2001 | ssr2422 |
| slr0952 | slr2087 | sll0519 | sll1760 | sll1909 | ssr2831 | sll1553 | smr0009 | sll1430 | ssr2422 |
| slr1511 | slr2087 | sll0469 | sll0519 | sll0373 | ssr2831 | slr0638 | smr0009 | sll0573 | ssr2422 |
| sll1605 | slr2087 | sll0519 | slr1517 | slr2035 | ssr2831 | slr0220 | smr0009 | slr1898 | ssr2422 |
| sll0990 | slr2087 | sll0519 | sll0869 | slr2132 | ssr2831 | slr0357 | smr0009 | sll0080 | ssr2422 |
| sll1633 | slr2087 | sll0519 | slr1598 | slr0922 | ssr2831 | sll1362 | smr0009 | slr1022 | ssr2422 |
| slr0018 | slr2087 | sll0519 | sll0868 | slr0838 | ssr2831 | slr1550 | smr0009 | sll1883 | ssr2422 |
| sll0567 | slr2087 | sll0519 | slr0994 | sll1823 | ssr2831 | sll1074 | smr0009 | slr1133 | ssr2422 |
| slr0884 | slr2087 | sll0379 | sll0519 | sll1056 | ssr2831 | slr0649 | smr0009 | slr0444 | ssr2422 |
| sll1342 | slr2087 | sll0519 | sll1676 | slr0520 | ssr2831 | sll0495 | smr0009 | slr2130 | ssr2422 |
| slr1349 | slr2087 | sll0519 | sll0927 | sll0144 | ssr2831 | sll1425 | smr0009 | sll1669 | ssr2422 |
| sll0593 | slr2087 | sll0519 | sll0996 | sll0467 | ssr2831 | sll0502 | smr0009 | slr0585 | ssr2422 |
| sll0220 | slr2087 | sll0519 | sll0844 | slr0711 | ssr2831 | slr1703 | smr0009 | slr2075 | ssr2422 |
| sll0899 | slr2087 | sll0519 | sll1615 | sll0754 | ssr2831 | sll0078 | smr0009 | slr2076 | ssr2422 |
| slr1756 | slr2087 | sll0202 | sll0519 | sll0569 | ssr2831 | slr0557 | smr0009 | sll0416 | ssr2422 |
| sll1085 | slr2087 | sll0519 | slr0902 | sll1277 | ssr2831 | slr1884 | smr0009 | slr0156 | ssr2422 |
| sll1931 | slr2087 | sll0519 | sll1144 | sll1110 | ssr2831 | slr1031 | smr0009 | slr1641 | ssr2422 |
| sll0083 | slr2087 | sll0519 | slr0017 | sll1865 | ssr2831 | slr1793 | smr0009 | slr0542 | ssr2422 |
| slr1755 | slr2087 | sll0519 | slr1424 | slr1228 | ssr2831 | slr0633 | smr0009 | sll0534 | ssr2422 |

|         |         |         |         |         |         |         |         |         |         |
|---------|---------|---------|---------|---------|---------|---------|---------|---------|---------|
| slI0057 | slr2087 | slI0519 | slr1423 | slr0808 | ssr2831 | slr1278 | smr0009 | slr0165 | ssr2422 |
| slI0017 | slr2087 | slI0519 | slI2010 | slr0082 | ssr2831 | slr0783 | smr0009 | slI0030 | ssr2422 |
| slI1185 | slr2087 | slI0519 | slr0528 | slr0742 | ssr2831 | slI1198 | smr0009 | slr0847 | ssr2422 |
| slr0839 | slr2087 | slI0519 | slr1351 | slI0098 | ssr2831 | slI0204 | smr0009 | slr0553 | ssr2422 |
| slI1876 | slr2087 | slI0519 | slI0622 | slr1646 | ssr2831 | slI1750 | smr0009 | slr0812 | ssr2422 |
| slI0900 | slr2087 | slI0519 | slI0631 | slr1130 | ssr2831 | slI0420 | smr0009 | slr1347 | ssr2422 |
| slr0608 | slr2087 | slI0519 | slr0787 | slr0080 | ssr2831 | slr1256 | smr0009 | slr1348 | ssr2422 |
| slr0652 | slr2087 | slI0519 | slI1852 | slr0551 | ssr2831 | slI1639 | smr0009 | slr1791 | ssr2422 |
| slr0084 | slr2087 | slI0519 | slr1090 | slI0145 | ssr2831 | slr1899 | smr0009 | slI0594 | ssr2422 |
| slI1893 | slr2087 | slI0519 | slI0902 | slI0708 | ssr2831 | slI0643 | smr0009 | slr0550 | ssr2422 |
| slr0500 | slr2087 | slI0519 | slr0661 | slr0679 | ssr2831 | slr1844 | smr0009 | slI1058 | ssr2422 |
| slr1560 | slr2087 | slI0519 | slr0526 | slr0722 | ssr2831 | slI0459 | smr0009 | slr1665 | ssr2422 |
| slI1988 | slr2087 | slI0519 | slI1249 | slr0072 | ssr2831 | slI0865 | smr0009 | slr0536 | ssr2422 |
| slr1289 | slr2087 | slI0519 | slI0892 | slI1547 | ssr2831 | slr0733 | smr0009 | slr1874 | ssr2422 |
| slI1556 | slr2087 | slI0519 | slI0660 | slI1234 | ssr2831 | slI1459 | smr0009 | slI1776 | ssr2422 |
| slr2087 | ssl3441 | slI0519 | slr1779 | slI0616 | ssr2831 | slI0905 | smr0009 | slI0848 | ssr2422 |
| slr0744 | slr2087 | slI0519 | slr0394 | slr2073 | ssr2831 | slI0402 | smr0001 | slI0897 | ssr2422 |
| slr0974 | slr2087 | slI0519 | slr2047 | slr1639 | ssr2831 | slI0728 | smr0001 | slI1933 | ssr2422 |
| slr1622 | slr2087 | slI0519 | slr0741 | slI1108 | ssr2831 | slI0336 | smr0001 | slr0965 | ssr2422 |
| slI1196 | slr2087 | slI0519 | slr1510 | slI0362 | ssr2831 | slI1299 | smr0001 | slr1463 | ssr2422 |
| slI0745 | slr2087 | slI0519 | slI1043 | slr0958 | ssr2831 | smr0001 | ssl2084 | slI1098 | ssr2422 |
| slI1815 | slr2087 | slI0519 | slr0400 | slr1720 | ssr2831 | slI2001 | smr0001 | slr0434 | ssr2422 |
| slI1059 | slr2087 | slI0519 | slI1415 | slI0179 | ssr2831 | slI1430 | smr0001 | slI1261 | ssr2422 |
| slr1123 | slr2087 | slI0519 | slI1909 | slI0454 | ssr2831 | slI0573 | smr0001 | slI1099 | ssr2422 |
| slI1760 | slr2087 | slI0373 | slI0519 | slI1553 | ssr2831 | slr1898 | smr0001 | slr0752 | ssr2422 |
| slI0469 | slr2087 | slI0519 | slr2035 | slr0638 | ssr2831 | slI0080 | smr0001 | slr0952 | ssr2422 |
| slr1517 | slr2087 | slI0519 | slr2132 | slr0220 | ssr2831 | slr1022 | smr0001 | slr1511 | ssr2422 |
| slI0869 | slr2087 | slI0519 | slr0922 | slr0357 | ssr2831 | slI1883 | smr0001 | slI1605 | ssr2422 |
| slr1598 | slr2087 | slI0519 | slr0838 | slI1362 | ssr2831 | slr1133 | smr0001 | slI0990 | ssr2422 |
| slI0868 | slr2087 | slI0519 | slI1823 | slr1550 | ssr2831 | slr0444 | smr0001 | slI1633 | ssr2422 |
| slr0994 | slr2087 | slI0519 | slI1056 | slI1074 | ssr2831 | slr2130 | smr0001 | slr0018 | ssr2422 |
| slI0379 | slr2087 | slI0519 | slr0520 | slr0649 | ssr2831 | slI1669 | smr0001 | slI0567 | ssr2422 |
| slI1676 | slr2087 | slI0144 | slI0519 | slI0495 | ssr2831 | slr0585 | smr0001 | slr0884 | ssr2422 |
| slI0927 | slr2087 | slI0467 | slI0519 | slI1425 | ssr2831 | slr2075 | smr0001 | slI1342 | ssr2422 |
| slI0996 | slr2087 | slI0519 | slr0711 | slI0502 | ssr2831 | slr2076 | smr0001 | slr1349 | ssr2422 |
| slI0844 | slr2087 | slI0519 | slI0754 | slr1703 | ssr2831 | slI0416 | smr0001 | slI0593 | ssr2422 |
| slI1615 | slr2087 | slI0519 | slI0569 | slI0078 | ssr2831 | slr0156 | smr0001 | slI0220 | ssr2422 |
| slI0202 | slr2087 | slI0519 | slI1277 | slr0557 | ssr2831 | slr1641 | smr0001 | slI0899 | ssr2422 |
| slr0902 | slr2087 | slI0519 | slI1110 | slr1884 | ssr2831 | slr0542 | smr0001 | slr1756 | ssr2422 |
| slI1144 | slr2087 | slI0519 | slI1865 | slr1031 | ssr2831 | slI0534 | smr0001 | slI1085 | ssr2422 |
| slr0017 | slr2087 | slI0519 | slr1228 | slr1793 | ssr2831 | slr0165 | smr0001 | slI1931 | ssr2422 |
| slr1424 | slr2087 | slI0519 | slr0808 | slr0633 | ssr2831 | slI0030 | smr0001 | slI0083 | ssr2422 |
| slr1423 | slr2087 | slI0519 | slr0082 | slr1278 | ssr2831 | slr0847 | smr0001 | slr1755 | ssr2422 |
| slI2010 | slr2087 | slI0519 | slr0742 | slr0783 | ssr2831 | slr0553 | smr0001 | slI0057 | ssr2422 |
| slr0528 | slr2087 | slI0098 | slI0519 | slI1198 | ssr2831 | slr0812 | smr0001 | slI0017 | ssr2422 |
| slr1351 | slr2087 | slI0519 | slr1646 | slI0204 | ssr2831 | slr1347 | smr0001 | slI1185 | ssr2422 |
| slI0622 | slr2087 | slI0519 | slr1130 | slI1750 | ssr2831 | slr1348 | smr0001 | slr0839 | ssr2422 |
| slI0631 | slr2087 | slI0519 | slr0080 | slI0420 | ssr2831 | slr1791 | smr0001 | slI1876 | ssr2422 |
| slr0787 | slr2087 | slI0519 | slr0551 | slr1256 | ssr2831 | slI0594 | smr0001 | slI0900 | ssr2422 |
| slI1852 | slr2087 | slI0145 | slI0519 | slI1639 | ssr2831 | slr0550 | smr0001 | slr0608 | ssr2422 |
| slr1090 | slr2087 | slI0519 | slI0708 | slr1899 | ssr2831 | slI1058 | smr0001 | slr0652 | ssr2422 |



|         |         |         |         |         |         |         |         |         |         |
|---------|---------|---------|---------|---------|---------|---------|---------|---------|---------|
| slI0902 | slr2087 | slI0519 | slr0679 | slI0643 | ssr2831 | slr1665 | smr0001 | slr0084 | ssr2422 |
| slr0661 | slr2087 | slI0519 | slr0722 | slr1844 | ssr2831 | slr0536 | smr0001 | slI1893 | ssr2422 |
| slr0526 | slr2087 | slI0519 | slr0072 | slI0459 | ssr2831 | slr1874 | smr0001 | slr0500 | ssr2422 |
| slI1249 | slr2087 | slI0519 | slI1547 | slr0733 | ssr2831 | slI1776 | smr0001 | slr1560 | ssr2422 |
| slI0892 | slr2087 | slI0519 | slI1234 | slI1459 | ssr2831 | slI0848 | smr0001 | slI1988 | ssr2422 |
| slI0660 | slr2087 | slI0519 | slI0616 | slI0905 | ssr2831 | slI0897 | smr0001 | slr1289 | ssr2422 |
| slr1779 | slr2087 | slI0519 | slr2073 | slI0402 | smr0004 | slI1933 | smr0001 | slI1556 | ssr2422 |
| slr0394 | slr2087 | slI0519 | slr1639 | slI0728 | smr0004 | slr0965 | smr0001 | ssl3441 | ssr2422 |
| slr2047 | slr2087 | slI0519 | slI1108 | slI0336 | smr0004 | slr1463 | smr0001 | slr0744 | ssr2422 |
| slr0741 | slr2087 | slI0362 | slI0519 | slI1299 | smr0004 | slI1098 | smr0001 | slr0974 | ssr2422 |
| slr1510 | slr2087 | slI0519 | slr0958 | smr0004 | ssl2084 | slr0434 | smr0001 | slr1622 | ssr2422 |
| slI1043 | slr2087 | slI0519 | slr1720 | slI2001 | smr0004 | slI1261 | smr0001 | slI1196 | ssr2422 |
| slr0400 | slr2087 | slI0179 | slI0519 | slI1430 | smr0004 | slI1099 | smr0001 | slI0745 | ssr2422 |
| slI1415 | slr2087 | slI0454 | slI0519 | slI0573 | smr0004 | slr0752 | smr0001 | slI1815 | ssr2422 |
| slI1909 | slr2087 | slI0519 | slI1553 | slr1898 | smr0004 | slr0952 | smr0001 | slI1059 | ssr2422 |
| slI0373 | slr2087 | slI0519 | slr0638 | slI0080 | smr0004 | slr1511 | smr0001 | slr1123 | ssr2422 |
| slr2035 | slr2087 | slI0519 | slr0220 | slr1022 | smr0004 | slI1605 | smr0001 | slI1760 | ssr2422 |
| slr2087 | slr2132 | slI0519 | slr0357 | slI1883 | smr0004 | slI0990 | smr0001 | slI0469 | ssr2422 |
| slr0922 | slr2087 | slI0519 | slI1362 | slr1133 | smr0004 | slI1633 | smr0001 | slr1517 | ssr2422 |
| slr0838 | slr2087 | slI0519 | slr1550 | slr0444 | smr0004 | slr0018 | smr0001 | slI0869 | ssr2422 |
| slI1823 | slr2087 | slI0519 | slI1074 | slr2130 | smr0004 | slI0567 | smr0001 | slr1598 | ssr2422 |
| slI1056 | slr2087 | slI0519 | slr0649 | slI1669 | smr0004 | slr0884 | smr0001 | slI0868 | ssr2422 |
| slr0520 | slr2087 | slI0495 | slI0519 | slr0585 | smr0004 | slI1342 | smr0001 | slr0994 | ssr2422 |
| slI0144 | slr2087 | slI0519 | slI1425 | slr2075 | smr0004 | slr1349 | smr0001 | slI0379 | ssr2422 |
| slI0467 | slr2087 | slI0502 | slI0519 | slr2076 | smr0004 | slI0593 | smr0001 | slI1676 | ssr2422 |
| slr0711 | slr2087 | slI0519 | slr1703 | slI0416 | smr0004 | slI0220 | smr0001 | slI0927 | ssr2422 |
| slI0754 | slr2087 | slI0078 | slI0519 | slr0156 | smr0004 | slI0899 | smr0001 | slI0996 | ssr2422 |
| slI0569 | slr2087 | slI0519 | slr0557 | slr1641 | smr0004 | slr1756 | smr0001 | slI0844 | ssr2422 |
| slI1277 | slr2087 | slI0519 | slr1884 | slr0542 | smr0004 | slI1085 | smr0001 | slI1615 | ssr2422 |
| slI1110 | slr2087 | slI0519 | slr1031 | slI0534 | smr0004 | slI1931 | smr0001 | slI0202 | ssr2422 |
| slI1865 | slr2087 | slI0519 | slr1793 | slr0165 | smr0004 | slI0083 | smr0001 | slr0902 | ssr2422 |
| slr1228 | slr2087 | slI0519 | slr0633 | slI0030 | smr0004 | slr1755 | smr0001 | slI1144 | ssr2422 |
| slr0808 | slr2087 | slI0519 | slr1278 | slr0847 | smr0004 | slI0057 | smr0001 | slr0017 | ssr2422 |
| slr0082 | slr2087 | slI0519 | slr0783 | slr0553 | smr0004 | slI0017 | smr0001 | slr1424 | ssr2422 |
| slr0742 | slr2087 | slI0519 | slI1198 | slr0812 | smr0004 | slI1185 | smr0001 | slr1423 | ssr2422 |
| slI0098 | slr2087 | slI0204 | slI0519 | slr1347 | smr0004 | slr0839 | smr0001 | slI2010 | ssr2422 |
| slr1646 | slr2087 | slI0519 | slI1750 | slr1348 | smr0004 | slI1876 | smr0001 | slr0528 | ssr2422 |
| slr1130 | slr2087 | slI0420 | slI0519 | slr1791 | smr0004 | slI0900 | smr0001 | slr1351 | ssr2422 |
| slr0080 | slr2087 | slI0519 | slr1256 | slI0594 | smr0004 | slr0608 | smr0001 | slI0622 | ssr2422 |
| slr0551 | slr2087 | slI0519 | slI1639 | slr0550 | smr0004 | slr0652 | smr0001 | slI0631 | ssr2422 |
| slI0145 | slr2087 | slI0519 | slr1899 | slI1058 | smr0004 | slr0084 | smr0001 | slr0787 | ssr2422 |
| slI0708 | slr2087 | slI0519 | slI0643 | slr1665 | smr0004 | slI1893 | smr0001 | slI1852 | ssr2422 |
| slr0679 | slr2087 | slI0519 | slr1844 | slr0536 | smr0004 | slr0500 | smr0001 | slr1090 | ssr2422 |
| slr0722 | slr2087 | slI0459 | slI0519 | slr1874 | smr0004 | slr1560 | smr0001 | slI0902 | ssr2422 |
| slr0072 | slr2087 | slI0519 | slI0865 | slI1776 | smr0004 | slI1988 | smr0001 | slr0661 | ssr2422 |
| slI1547 | slr2087 | slI0519 | slr0733 | slI0848 | smr0004 | slr1289 | smr0001 | slr0526 | ssr2422 |
| slI1234 | slr2087 | slI0519 | slI1459 | slI0897 | smr0004 | slI1556 | smr0001 | slI1249 | ssr2422 |
| slI0616 | slr2087 | slI0519 | slI0905 | slI1933 | smr0004 | smr0001 | ssl3441 | slI0892 | ssr2422 |
| slr2073 | slr2087 | slI0223 | slI0402 | slr0965 | smr0004 | slr0744 | smr0001 | slI0660 | ssr2422 |
| slr1639 | slr2087 | slI0223 | slI0728 | slr1463 | smr0004 | slr0974 | smr0001 | slr1779 | ssr2422 |
| slI1108 | slr2087 | slI0223 | slI0336 | slI1098 | smr0004 | slr1622 | smr0001 | slr0394 | ssr2422 |

|         |         |         |         |         |         |         |         |         |         |
|---------|---------|---------|---------|---------|---------|---------|---------|---------|---------|
| slI0362 | slr2087 | slI0223 | slI1299 | slr0434 | smr0004 | slI1196 | smr0001 | slr2047 | ssr2422 |
| slr0958 | slr2087 | slI0223 | ssl2084 | slI1261 | smr0004 | slI0745 | smr0001 | slr0741 | ssr2422 |
| slr1720 | slr2087 | slI0223 | slI2001 | slI1099 | smr0004 | slI1815 | smr0001 | slr1510 | ssr2422 |
| slI0179 | slr2087 | slI0223 | slI1430 | slr0752 | smr0004 | slI1059 | smr0001 | slI1043 | ssr2422 |
| slI0454 | slr2087 | slI0223 | slI0573 | slr0952 | smr0004 | slr1123 | smr0001 | slr0400 | ssr2422 |
| slI1553 | slr2087 | slI0223 | slr1898 | slr1511 | smr0004 | slI1760 | smr0001 | slI1415 | ssr2422 |
| slr0638 | slr2087 | slI0080 | slI0223 | slI1605 | smr0004 | slI0469 | smr0001 | slI1909 | ssr2422 |
| slr0220 | slr2087 | slI0223 | slr1022 | slI0990 | smr0004 | slr1517 | smr0001 | slI0373 | ssr2422 |
| slr0357 | slr2087 | slI0223 | slI1883 | slI1633 | smr0004 | slI0869 | smr0001 | slr2035 | ssr2422 |
| slI1362 | slr2087 | slI0223 | slr1133 | slr0018 | smr0004 | slr1598 | smr0001 | slr2132 | ssr2422 |
| slr1550 | slr2087 | slI0223 | slr0444 | slI0567 | smr0004 | slI0868 | smr0001 | slr0922 | ssr2422 |
| slI1074 | slr2087 | slI0223 | slr2130 | slr0884 | smr0004 | slr0994 | smr0001 | slr0838 | ssr2422 |
| slr0649 | slr2087 | slI0223 | slI1669 | slI1342 | smr0004 | slI0379 | smr0001 | slI1823 | ssr2422 |
| slI0495 | slr2087 | slI0223 | slr0585 | slr1349 | smr0004 | slI1676 | smr0001 | slI1056 | ssr2422 |
| slI1425 | slr2087 | slI0223 | slr2075 | slI0593 | smr0004 | slI0927 | smr0001 | slr0520 | ssr2422 |
| slI0502 | slr2087 | slI0223 | slr2076 | slI0220 | smr0004 | slI0996 | smr0001 | slI0144 | ssr2422 |
| slr1703 | slr2087 | slI0223 | slI0416 | slI0899 | smr0004 | slI0844 | smr0001 | slI0467 | ssr2422 |
| slI0078 | slr2087 | slI0223 | slr0156 | slr1756 | smr0004 | slI1615 | smr0001 | slr0711 | ssr2422 |
| slr0557 | slr2087 | slI0223 | slr1641 | slI1085 | smr0004 | slI0202 | smr0001 | slI0754 | ssr2422 |
| slr1884 | slr2087 | slI0223 | slr0542 | slI1931 | smr0004 | slr0902 | smr0001 | slI0569 | ssr2422 |
| slr1031 | slr2087 | slI0223 | slI0534 | slI0083 | smr0004 | slI1144 | smr0001 | slI1277 | ssr2422 |
| slr1793 | slr2087 | slI0223 | slr0165 | slr1755 | smr0004 | slr0017 | smr0001 | slI1110 | ssr2422 |
| slr0633 | slr2087 | slI0030 | slI0223 | slI0057 | smr0004 | slr1424 | smr0001 | slI1865 | ssr2422 |
| slr1278 | slr2087 | slI0223 | slr0847 | slI0017 | smr0004 | slr1423 | smr0001 | slr1228 | ssr2422 |
| slr0783 | slr2087 | slI0223 | slr0553 | slI1185 | smr0004 | slI2010 | smr0001 | slr0808 | ssr2422 |
| slI1198 | slr2087 | slI0223 | slr0812 | slr0839 | smr0004 | slr0528 | smr0001 | slr0082 | ssr2422 |
| slI0204 | slr2087 | slI0223 | slr1347 | slI1876 | smr0004 | slr1351 | smr0001 | slr0742 | ssr2422 |
| slI1750 | slr2087 | slI0223 | slr1348 | slI0900 | smr0004 | slI0622 | smr0001 | slI0098 | ssr2422 |
| slI0420 | slr2087 | slI0223 | slr1791 | slr0608 | smr0004 | slI0631 | smr0001 | slr1646 | ssr2422 |
| slr1256 | slr2087 | slI0223 | slI0594 | slr0652 | smr0004 | slr0787 | smr0001 | slr1130 | ssr2422 |
| slI1639 | slr2087 | slI0223 | slr0550 | slr0084 | smr0004 | slI1852 | smr0001 | slr0080 | ssr2422 |
| slr1899 | slr2087 | slI0223 | slI1058 | slI1893 | smr0004 | slr1090 | smr0001 | slr0551 | ssr2422 |
| slI0643 | slr2087 | slI0223 | slr1665 | slr0500 | smr0004 | slI0902 | smr0001 | slI0145 | ssr2422 |
| slr1844 | slr2087 | slI0223 | slr0536 | slr1560 | smr0004 | slr0661 | smr0001 | slI0708 | ssr2422 |
| slI0459 | slr2087 | slI0223 | slr1874 | slI1988 | smr0004 | slr0526 | smr0001 | slr0679 | ssr2422 |
| slI0865 | slr2087 | slI0223 | slI1776 | slr1289 | smr0004 | slI1249 | smr0001 | slr0722 | ssr2422 |
| slr0733 | slr2087 | slI0223 | slI0848 | slI1556 | smr0004 | slI0892 | smr0001 | slr0072 | ssr2422 |
| slI1459 | slr2087 | slI0223 | slI0897 | smr0004 | ssl3441 | slI0660 | smr0001 | slI1547 | ssr2422 |
| slI0905 | slr2087 | slI0223 | slI1933 | slr0744 | smr0004 | slr1779 | smr0001 | slI1234 | ssr2422 |
| slI0402 | slI1513 | slI0223 | slr0965 | slr0974 | smr0004 | slr0394 | smr0001 | slI0616 | ssr2422 |
| slI0728 | slI1513 | slI0223 | slr1463 | slr1622 | smr0004 | slr2047 | smr0001 | slr2073 | ssr2422 |
| slI0336 | slI1513 | slI0223 | slI1098 | slI1196 | smr0004 | slr0741 | smr0001 | slr1639 | ssr2422 |
| slI1299 | slI1513 | slI0223 | slr0434 | slI0745 | smr0004 | slr1510 | smr0001 | slI1108 | ssr2422 |
| slI1513 | ssl2084 | slI0223 | slI1261 | slI1815 | smr0004 | slI1043 | smr0001 | slI0362 | ssr2422 |
| slI1513 | slI2001 | slI0223 | slI1099 | slI1059 | smr0004 | slr0400 | smr0001 | slr0958 | ssr2422 |
| slI1430 | slI1513 | slI0223 | slr0752 | slr1123 | smr0004 | slI1415 | smr0001 | slr1720 | ssr2422 |
| slI0573 | slI1513 | slI0223 | slr0952 | slI1760 | smr0004 | slI1909 | smr0001 | slI0179 | ssr2422 |
| slI1513 | slr1898 | slI0223 | slr1511 | slI0469 | smr0004 | slI0373 | smr0001 | slI0454 | ssr2422 |
| slI0080 | slI1513 | slI0223 | slI1605 | slr1517 | smr0004 | slr2035 | smr0001 | slI1553 | ssr2422 |
| slI1513 | slr1022 | slI0223 | slI0990 | slI0869 | smr0004 | slr2132 | smr0001 | slr0638 | ssr2422 |
| slI1513 | slI1883 | slI0223 | slI1633 | slr1598 | smr0004 | slr0922 | smr0001 | slr0220 | ssr2422 |

|         |         |         |         |         |         |         |         |         |         |
|---------|---------|---------|---------|---------|---------|---------|---------|---------|---------|
| sll1513 | slr1133 | sll0223 | slr0018 | sll0868 | smr0004 | slr0838 | smr0001 | slr0357 | ssr2422 |
| sll1513 | slr0444 | sll0223 | sll0567 | slr0994 | smr0004 | sll1823 | smr0001 | sll1362 | ssr2422 |
| sll1513 | slr2130 | sll0223 | slr0884 | sll0379 | smr0004 | sll1056 | smr0001 | slr1550 | ssr2422 |
| sll1513 | sll1669 | sll0223 | sll1342 | sll1676 | smr0004 | slr0520 | smr0001 | sll1074 | ssr2422 |
| sll1513 | slr0585 | sll0223 | slr1349 | sll0927 | smr0004 | sll0144 | smr0001 | slr0649 | ssr2422 |
| sll1513 | slr2075 | sll0223 | sll0593 | sll0996 | smr0004 | sll0467 | smr0001 | sll0495 | ssr2422 |
| sll1513 | slr2076 | sll0220 | sll0223 | sll0844 | smr0004 | slr0711 | smr0001 | sll1425 | ssr2422 |
| sll0416 | sll1513 | sll0223 | sll0899 | sll1615 | smr0004 | sll0754 | smr0001 | sll0502 | ssr2422 |
| sll1513 | slr0156 | sll0223 | slr1756 | sll0202 | smr0004 | sll0569 | smr0001 | slr1703 | ssr2422 |
| sll1513 | slr1641 | sll0223 | sll1085 | slr0902 | smr0004 | sll1277 | smr0001 | sll0078 | ssr2422 |
| sll1513 | slr0542 | sll0223 | sll1931 | sll1144 | smr0004 | sll1110 | smr0001 | slr0557 | ssr2422 |
| sll0534 | sll1513 | sll0083 | sll0223 | slr0017 | smr0004 | sll1865 | smr0001 | slr1884 | ssr2422 |
| sll1513 | slr0165 | sll0223 | slr1755 | slr1424 | smr0004 | slr1228 | smr0001 | slr1031 | ssr2422 |
| sll0030 | sll1513 | sll0057 | sll0223 | slr1423 | smr0004 | slr0808 | smr0001 | slr1793 | ssr2422 |
| sll1513 | slr0847 | sll0017 | sll0223 | sll2010 | smr0004 | slr0082 | smr0001 | slr0633 | ssr2422 |
| sll1513 | slr0553 | sll0223 | sll1185 | slr0528 | smr0004 | slr0742 | smr0001 | slr1278 | ssr2422 |
| sll1513 | slr0812 | sll0223 | sll1876 | slr1351 | smr0004 | sll0098 | smr0001 | slr0783 | ssr2422 |
| sll1513 | slr1347 | sll0223 | sll0900 | sll0622 | smr0004 | slr1646 | smr0001 | sll1198 | ssr2422 |
| sll1513 | slr1348 | sll0223 | slr0608 | sll0631 | smr0004 | slr1130 | smr0001 | sll0204 | ssr2422 |
| sll1513 | slr1791 | sll0223 | slr0652 | slr0787 | smr0004 | slr0080 | smr0001 | sll1750 | ssr2422 |
| sll0594 | sll1513 | sll0223 | slr0084 | sll1852 | smr0004 | slr0551 | smr0001 | sll0420 | ssr2422 |
| sll1513 | slr0550 | sll0223 | sll1893 | slr1090 | smr0004 | sll0145 | smr0001 | slr1256 | ssr2422 |
| sll1058 | sll1513 | sll0223 | slr0500 | sll0902 | smr0004 | sll0708 | smr0001 | sll1639 | ssr2422 |
| sll1513 | slr1665 | sll0223 | slr1560 | slr0661 | smr0004 | slr0679 | smr0001 | slr1899 | ssr2422 |
| sll1513 | slr0536 | sll0223 | sll1988 | slr0526 | smr0004 | slr0722 | smr0001 | sll0643 | ssr2422 |
| sll1513 | slr1874 | sll0223 | slr1289 | sll1249 | smr0004 | slr0072 | smr0001 | slr1844 | ssr2422 |
| sll1513 | sll1776 | sll0223 | sll1556 | sll0892 | smr0004 | sll1547 | smr0001 | sll0459 | ssr2422 |
| sll0848 | sll1513 | sll0223 | ssl3441 | sll0660 | smr0004 | sll1234 | smr0001 | sll0865 | ssr2422 |
| sll0897 | sll1513 | sll0223 | slr0744 | slr1779 | smr0004 | sll0616 | smr0001 | slr0733 | ssr2422 |
| sll1513 | sll1933 | sll0223 | slr0974 | slr0394 | smr0004 | slr2073 | smr0001 | sll1459 | ssr2422 |
| sll1513 | slr0965 | sll0223 | slr1622 | slr2047 | smr0004 | slr1639 | smr0001 | sll0905 | ssr2422 |
| sll1513 | slr1463 | sll0223 | sll1196 | slr0741 | smr0004 | sll1108 | smr0001 | sll0402 | ssl2501 |
| sll1098 | sll1513 | sll0223 | sll0745 | slr1510 | smr0004 | sll0362 | smr0001 | sll0728 | ssl2501 |
| sll1513 | slr0434 | sll0223 | sll1815 | sll1043 | smr0004 | slr0958 | smr0001 | sll0336 | ssl2501 |
| sll1261 | sll1513 | sll0223 | sll1059 | slr0400 | smr0004 | slr1720 | smr0001 | sll1299 | ssl2501 |
| sll1099 | sll1513 | sll0223 | slr1123 | sll1415 | smr0004 | sll0179 | smr0001 | ssl2084 | ssl2501 |
| sll1513 | slr0752 | sll0223 | sll1760 | sll1909 | smr0004 | sll0454 | smr0001 | sll2001 | ssl2501 |
| sll1513 | slr0952 | sll0223 | sll0469 | sll0373 | smr0004 | sll1553 | smr0001 | sll1430 | ssl2501 |
| sll1513 | slr1511 | sll0223 | slr1517 | slr2035 | smr0004 | slr0638 | smr0001 | sll0573 | ssl2501 |
| sll1513 | sll1605 | sll0223 | sll0869 | slr2132 | smr0004 | slr0220 | smr0001 | slr1898 | ssl2501 |
| sll0990 | sll1513 | sll0223 | slr1598 | slr0922 | smr0004 | slr0357 | smr0001 | sll0080 | ssl2501 |
| sll1513 | sll1633 | sll0223 | sll0868 | slr0838 | smr0004 | sll1362 | smr0001 | slr1022 | ssl2501 |
| sll1513 | slr0018 | sll0223 | slr0994 | sll1823 | smr0004 | slr1550 | smr0001 | sll1883 | ssl2501 |
| sll0567 | sll1513 | sll0223 | sll0379 | sll1056 | smr0004 | sll1074 | smr0001 | slr1133 | ssl2501 |
| sll1513 | slr0884 | sll0223 | sll1676 | slr0520 | smr0004 | slr0649 | smr0001 | slr0444 | ssl2501 |
| sll1342 | sll1513 | sll0223 | sll0927 | sll0144 | smr0004 | sll0495 | smr0001 | slr2130 | ssl2501 |
| sll1513 | slr1349 | sll0223 | sll0996 | sll0467 | smr0004 | sll1425 | smr0001 | sll1669 | ssl2501 |
| sll0593 | sll1513 | sll0223 | sll0844 | slr0711 | smr0004 | sll0502 | smr0001 | slr0585 | ssl2501 |
| sll0220 | sll1513 | sll0223 | sll1615 | sll0754 | smr0004 | slr1703 | smr0001 | slr2075 | ssl2501 |
| sll0899 | sll1513 | sll0202 | sll0223 | sll0569 | smr0004 | sll0078 | smr0001 | slr2076 | ssl2501 |
| sll1513 | slr1756 | sll0223 | slr0902 | sll1277 | smr0004 | slr0557 | smr0001 | sll0416 | ssl2501 |

|         |         |         |         |         |         |         |         |         |         |
|---------|---------|---------|---------|---------|---------|---------|---------|---------|---------|
| sll1085 | sll1513 | sll0223 | sll1144 | sll1110 | smr0004 | slr1884 | smr0001 | slr0156 | ssl2501 |
| sll1513 | sll1931 | sll0223 | slr0017 | sll1865 | smr0004 | slr1031 | smr0001 | slr1641 | ssl2501 |
| sll0083 | sll1513 | sll0223 | slr1424 | slr1228 | smr0004 | slr1793 | smr0001 | slr0542 | ssl2501 |
| sll1513 | slr1755 | sll0223 | slr1423 | slr0808 | smr0004 | slr0633 | smr0001 | sll0534 | ssl2501 |
| sll0057 | sll1513 | sll0223 | sll2010 | slr0082 | smr0004 | slr1278 | smr0001 | slr0165 | ssl2501 |
| sll0017 | sll1513 | sll0223 | slr0528 | slr0742 | smr0004 | slr0783 | smr0001 | sll0030 | ssl2501 |
| sll1185 | sll1513 | sll0223 | slr1351 | sll0098 | smr0004 | sll1198 | smr0001 | slr0847 | ssl2501 |
| sll1513 | slr0839 | sll0223 | sll0622 | slr1646 | smr0004 | sll0204 | smr0001 | slr0553 | ssl2501 |
| sll1513 | sll1876 | sll0223 | sll0631 | slr1130 | smr0004 | sll1750 | smr0001 | slr0812 | ssl2501 |
| sll0900 | sll1513 | sll0223 | slr0787 | slr0080 | smr0004 | sll0420 | smr0001 | slr1347 | ssl2501 |
| sll1513 | slr0608 | sll0223 | sll1852 | slr0551 | smr0004 | slr1256 | smr0001 | slr1348 | ssl2501 |
| sll1513 | slr0652 | sll0223 | slr1090 | sll0145 | smr0004 | sll1639 | smr0001 | slr1791 | ssl2501 |
| sll1513 | slr0084 | sll0223 | sll0902 | sll0708 | smr0004 | slr1899 | smr0001 | sll0594 | ssl2501 |
| sll1513 | sll1893 | sll0223 | slr0661 | slr0679 | smr0004 | sll0643 | smr0001 | slr0550 | ssl2501 |
| sll1513 | slr0500 | sll0223 | slr0526 | slr0722 | smr0004 | slr1844 | smr0001 | sll1058 | ssl2501 |
| sll1513 | slr1560 | sll0223 | sll1249 | slr0072 | smr0004 | sll0459 | smr0001 | slr1665 | ssl2501 |
| sll1513 | sll1988 | sll0223 | sll0892 | sll1547 | smr0004 | sll0865 | smr0001 | slr0536 | ssl2501 |
| sll1513 | slr1289 | sll0223 | sll0660 | sll1234 | smr0004 | slr0733 | smr0001 | slr1874 | ssl2501 |
| sll1513 | sll1556 | sll0223 | slr1779 | sll0616 | smr0004 | sll1459 | smr0001 | sll1776 | ssl2501 |
| sll1513 | ssl3441 | sll0223 | slr0394 | slr2073 | smr0004 | sll0905 | smr0001 | sll0848 | ssl2501 |
| sll1513 | slr0744 | sll0223 | slr2047 | slr1639 | smr0004 | sll0402 | sll1194 | sll0897 | ssl2501 |
| sll1513 | slr0974 | sll0223 | slr0741 | sll1108 | smr0004 | sll0728 | sll1194 | sll1933 | ssl2501 |
| sll1513 | slr1622 | sll0223 | slr1510 | sll0362 | smr0004 | sll0336 | sll1194 | slr0965 | ssl2501 |
| sll1196 | sll1513 | sll0223 | sll1043 | slr0958 | smr0004 | sll1194 | sll1299 | slr1463 | ssl2501 |
| sll0745 | sll1513 | sll0223 | slr0400 | slr1720 | smr0004 | sll1194 | ssl2084 | sll1098 | ssl2501 |
| sll1513 | sll1815 | sll0223 | sll1415 | sll0179 | smr0004 | sll1194 | sll2001 | slr0434 | ssl2501 |
| sll1059 | sll1513 | sll0223 | sll1909 | sll0454 | smr0004 | sll1194 | sll1430 | sll1261 | ssl2501 |
| sll1513 | slr1123 | sll0223 | sll0373 | sll1553 | smr0004 | sll0573 | sll1194 | sll1099 | ssl2501 |
| sll1513 | sll1760 | sll0223 | slr2035 | slr0638 | smr0004 | sll1194 | slr1898 | slr0752 | ssl2501 |
| sll0469 | sll1513 | sll0223 | slr2132 | slr0220 | smr0004 | sll0080 | sll1194 | slr0952 | ssl2501 |
| sll1513 | slr1517 | sll0223 | slr0922 | slr0357 | smr0004 | sll1194 | slr1022 | slr1511 | ssl2501 |
| sll0869 | sll1513 | sll0223 | slr0838 | sll1362 | smr0004 | sll1194 | sll1883 | sll1605 | ssl2501 |
| sll1513 | slr1598 | sll0223 | sll1823 | slr1550 | smr0004 | sll1194 | slr1133 | sll0990 | ssl2501 |
| sll0868 | sll1513 | sll0223 | sll1056 | sll1074 | smr0004 | sll1194 | slr0444 | sll1633 | ssl2501 |
| sll1513 | slr0994 | sll0223 | slr0520 | slr0649 | smr0004 | sll1194 | slr2130 | slr0018 | ssl2501 |
| sll0379 | sll1513 | sll0144 | sll0223 | sll0495 | smr0004 | sll1194 | sll1669 | sll0567 | ssl2501 |
| sll1513 | sll1676 | sll0223 | sll0467 | sll1425 | smr0004 | sll1194 | slr0585 | slr0884 | ssl2501 |
| sll0927 | sll1513 | sll0223 | slr0711 | sll0502 | smr0004 | sll1194 | slr2075 | sll1342 | ssl2501 |
| sll0996 | sll1513 | sll0223 | sll0754 | slr1703 | smr0004 | sll1194 | slr2076 | slr1349 | ssl2501 |
| sll0844 | sll1513 | sll0223 | sll0569 | sll0078 | smr0004 | sll0416 | sll1194 | sll0593 | ssl2501 |
| sll1513 | sll1615 | sll0223 | sll1277 | slr0557 | smr0004 | sll1194 | slr0156 | sll0220 | ssl2501 |
| sll0202 | sll1513 | sll0223 | sll1110 | slr1884 | smr0004 | sll1194 | slr1641 | sll0899 | ssl2501 |
| sll1513 | slr0902 | sll0223 | sll1865 | slr1031 | smr0004 | sll1194 | slr0542 | slr1756 | ssl2501 |
| sll1144 | sll1513 | sll0223 | slr1228 | slr1793 | smr0004 | sll0534 | sll1194 | sll1085 | ssl2501 |
| sll1513 | slr0017 | sll0223 | slr0808 | slr0633 | smr0004 | sll1194 | slr0165 | sll1931 | ssl2501 |
| sll1513 | slr1424 | sll0223 | slr0082 | slr1278 | smr0004 | sll0030 | sll1194 | sll0083 | ssl2501 |
| sll1513 | slr1423 | sll0223 | slr0742 | slr0783 | smr0004 | sll1194 | slr0847 | slr1755 | ssl2501 |
| sll1513 | sll2010 | sll0098 | sll0223 | sll1198 | smr0004 | sll1194 | slr0553 | sll0057 | ssl2501 |
| sll1513 | slr0528 | sll0223 | slr1646 | sll0204 | smr0004 | sll1194 | slr0812 | sll0017 | ssl2501 |
| sll1513 | slr1351 | sll0223 | slr1130 | sll1750 | smr0004 | sll1194 | slr1347 | sll1185 | ssl2501 |
| sll0622 | sll1513 | sll0223 | slr0080 | sll0420 | smr0004 | sll1194 | slr1348 | slr0839 | ssl2501 |

|         |         |         |         |         |         |         |         |         |         |
|---------|---------|---------|---------|---------|---------|---------|---------|---------|---------|
| sll0631 | sll1513 | sll0223 | slr0551 | slr1256 | smr0004 | sll1194 | slr1791 | sll1876 | ssl2501 |
| sll1513 | slr0787 | sll0145 | sll0223 | sll1639 | smr0004 | sll0594 | sll1194 | sll0900 | ssl2501 |
| sll1513 | sll1852 | sll0223 | sll0708 | slr1899 | smr0004 | sll1194 | slr0550 | slr0608 | ssl2501 |
| sll1513 | slr1090 | sll0223 | slr0679 | sll0643 | smr0004 | sll1058 | sll1194 | slr0652 | ssl2501 |
| sll0902 | sll1513 | sll0223 | slr0722 | slr1844 | smr0004 | sll1194 | slr1665 | slr0084 | ssl2501 |
| sll1513 | slr0661 | sll0223 | slr0072 | sll0459 | smr0004 | sll1194 | slr0536 | sll1893 | ssl2501 |
| sll1513 | slr0526 | sll0223 | sll1547 | sll0865 | smr0004 | sll1194 | slr1874 | slr0500 | ssl2501 |
| sll1249 | sll1513 | sll0223 | sll1234 | slr0733 | smr0004 | sll1194 | sll1776 | slr1560 | ssl2501 |
| sll0892 | sll1513 | sll0223 | sll0616 | sll1459 | smr0004 | sll0848 | sll1194 | sll1988 | ssl2501 |
| sll0660 | sll1513 | sll0223 | slr2073 | sll0905 | smr0004 | sll0897 | sll1194 | slr1289 | ssl2501 |
| sll1513 | slr1779 | sll0223 | slr1639 | sll0402 | sml0008 | sll1194 | sll1933 | sll1556 | ssl2501 |
| sll1513 | slr0394 | sll0223 | sll1108 | sll0728 | sml0008 | sll1194 | slr0965 | ssl2501 | ssl3441 |
| sll1513 | slr2047 | sll0223 | sll0362 | sll0336 | sml0008 | sll1194 | slr1463 | slr0744 | ssl2501 |
| sll1513 | slr0741 | sll0223 | slr0958 | sll1299 | sml0008 | sll1098 | sll1194 | slr0974 | ssl2501 |
| sll1513 | slr1510 | sll0223 | slr1720 | sml0008 | ssl2084 | sll1194 | slr0434 | slr1622 | ssl2501 |
| sll1043 | sll1513 | sll0179 | sll0223 | sll2001 | sml0008 | sll1194 | sll1261 | sll1196 | ssl2501 |
| sll1513 | slr0400 | sll0223 | sll0454 | sll1430 | sml0008 | sll1099 | sll1194 | sll0745 | ssl2501 |
| sll1415 | sll1513 | sll0223 | sll1553 | sll0573 | sml0008 | sll1194 | slr0752 | sll1815 | ssl2501 |
| sll1513 | sll1909 | sll0223 | slr0638 | slr1898 | sml0008 | sll1194 | slr0952 | sll1059 | ssl2501 |
| sll0373 | sll1513 | sll0223 | slr0220 | sll0080 | sml0008 | sll1194 | slr1511 | slr1123 | ssl2501 |
| sll1513 | slr2035 | sll0223 | slr0357 | slr1022 | sml0008 | sll1194 | sll1605 | sll1760 | ssl2501 |
| sll1513 | slr2132 | sll0223 | sll1362 | sll1883 | sml0008 | sll0990 | sll1194 | sll0469 | ssl2501 |
| sll1513 | slr0922 | sll0223 | slr1550 | slr1133 | sml0008 | sll1194 | sll1633 | slr1517 | ssl2501 |
| sll1513 | slr0838 | sll0223 | sll1074 | slr0444 | sml0008 | sll1194 | slr0018 | sll0869 | ssl2501 |
| sll1513 | sll1823 | sll0223 | slr0649 | slr2130 | sml0008 | sll0567 | sll1194 | slr1598 | ssl2501 |
| sll1056 | sll1513 | sll0223 | sll0495 | sll1669 | sml0008 | sll1194 | slr0884 | sll0868 | ssl2501 |
| sll1513 | slr0520 | sll0223 | sll1425 | slr0585 | sml0008 | sll1194 | sll1342 | slr0994 | ssl2501 |
| sll0144 | sll1513 | sll0223 | sll0502 | slr2075 | sml0008 | sll1194 | slr1349 | sll0379 | ssl2501 |
| sll0467 | sll1513 | sll0223 | slr1703 | slr2076 | sml0008 | sll0593 | sll1194 | sll1676 | ssl2501 |
| sll1513 | slr0711 | sll0078 | sll0223 | sll0416 | sml0008 | sll0220 | sll1194 | sll0927 | ssl2501 |
| sll0754 | sll1513 | sll0223 | slr0557 | slr0156 | sml0008 | sll0899 | sll1194 | sll0996 | ssl2501 |
| sll0569 | sll1513 | sll0223 | slr1884 | slr1641 | sml0008 | sll1194 | slr1756 | sll0844 | ssl2501 |
| sll1277 | sll1513 | sll0223 | slr1031 | slr0542 | sml0008 | sll1085 | sll1194 | sll1615 | ssl2501 |
| sll1110 | sll1513 | sll0223 | slr1793 | sll0534 | sml0008 | sll1194 | sll1931 | sll0202 | ssl2501 |
| sll1513 | sll1865 | sll0223 | slr0633 | slr0165 | sml0008 | sll0083 | sll1194 | slr0902 | ssl2501 |
| sll1513 | slr1228 | sll0223 | slr1278 | sll0030 | sml0008 | sll1194 | slr1755 | sll1144 | ssl2501 |
| sll1513 | slr0808 | sll0223 | slr0783 | slr0847 | sml0008 | sll0057 | sll1194 | slr0017 | ssl2501 |
| sll1513 | slr0082 | sll0223 | sll1198 | slr0553 | sml0008 | sll0017 | sll1194 | slr1424 | ssl2501 |
| sll1513 | slr0742 | sll0204 | sll0223 | slr0812 | sml0008 | sll1185 | sll1194 | slr1423 | ssl2501 |
| sll0098 | sll1513 | sll0223 | sll1750 | slr1347 | sml0008 | sll1194 | slr0839 | sll2010 | ssl2501 |
| sll1513 | slr1646 | sll0223 | sll0420 | slr1348 | sml0008 | sll1194 | sll1876 | slr0528 | ssl2501 |
| sll1513 | slr1130 | sll0223 | slr1256 | slr1791 | sml0008 | sll0900 | sll1194 | slr1351 | ssl2501 |
| sll1513 | slr0080 | sll0223 | sll1639 | sll0594 | sml0008 | sll1194 | slr0608 | sll0622 | ssl2501 |
| sll1513 | slr0551 | sll0223 | slr1899 | slr0550 | sml0008 | sll1194 | slr0652 | sll0631 | ssl2501 |
| sll0145 | sll1513 | sll0223 | sll0643 | sll1058 | sml0008 | sll1194 | slr0084 | slr0787 | ssl2501 |
| sll0708 | sll1513 | sll0223 | slr1844 | slr1665 | sml0008 | sll1194 | sll1893 | sll1852 | ssl2501 |
| sll1513 | slr0679 | sll0223 | sll0459 | slr0536 | sml0008 | sll1194 | slr0500 | slr1090 | ssl2501 |
| sll1513 | slr0722 | sll0223 | sll0865 | slr1874 | sml0008 | sll1194 | slr1560 | sll0902 | ssl2501 |
| sll1513 | slr0072 | sll0223 | slr0733 | sll1776 | sml0008 | sll1194 | sll1988 | slr0661 | ssl2501 |
| sll1513 | sll1547 | sll0223 | sll1459 | sll0848 | sml0008 | sll1194 | slr1289 | slr0526 | ssl2501 |
| sll1234 | sll1513 | sll0223 | sll0905 | sll0897 | sml0008 | sll1194 | sll1556 | sll1249 | ssl2501 |

|         |         |         |         |         |         |         |         |         |         |
|---------|---------|---------|---------|---------|---------|---------|---------|---------|---------|
| sll0616 | sll1513 | sll0402 | slr1279 | sll1933 | sml0008 | sll1194 | ssl3441 | sll0892 | ssl2501 |
| sll1513 | slr2073 | sll0728 | slr1279 | slr0965 | sml0008 | sll1194 | slr0744 | sll0660 | ssl2501 |
| sll1513 | slr1639 | sll0336 | slr1279 | slr1463 | sml0008 | sll1194 | slr0974 | slr1779 | ssl2501 |
| sll1108 | sll1513 | sll1299 | slr1279 | sll1098 | sml0008 | sll1194 | slr1622 | slr0394 | ssl2501 |
| sll0362 | sll1513 | slr1279 | ssl2084 | slr0434 | sml0008 | sll1194 | sll1196 | slr2047 | ssl2501 |
| sll1513 | slr0958 | sll2001 | slr1279 | sll1261 | sml0008 | sll0745 | sll1194 | slr0741 | ssl2501 |
| sll1513 | slr1720 | sll1430 | slr1279 | sll1099 | sml0008 | sll1194 | sll1815 | slr1510 | ssl2501 |
| sll0179 | sll1513 | sll0573 | slr1279 | slr0752 | sml0008 | sll1059 | sll1194 | sll1043 | ssl2501 |
| sll0454 | sll1513 | slr1279 | slr1898 | slr0952 | sml0008 | sll1194 | slr1123 | slr0400 | ssl2501 |
| sll1513 | sll1553 | sll0080 | slr1279 | slr1511 | sml0008 | sll1194 | sll1760 | sll1415 | ssl2501 |
| sll1513 | slr0638 | slr1022 | slr1279 | sll1605 | sml0008 | sll0469 | sll1194 | sll1909 | ssl2501 |
| sll1513 | slr0220 | sll1883 | slr1279 | sll0990 | sml0008 | sll1194 | slr1517 | sll0373 | ssl2501 |
| sll1513 | slr0357 | slr1133 | slr1279 | sll1633 | sml0008 | sll0869 | sll1194 | slr2035 | ssl2501 |
| sll1362 | sll1513 | slr0444 | slr1279 | slr0018 | sml0008 | sll1194 | slr1598 | slr2132 | ssl2501 |
| sll1513 | slr1550 | slr1279 | slr2130 | sll0567 | sml0008 | sll0868 | sll1194 | slr0922 | ssl2501 |
| sll1074 | sll1513 | sll1669 | slr1279 | slr0884 | sml0008 | sll1194 | slr0994 | slr0838 | ssl2501 |
| sll1513 | slr0649 | slr0585 | slr1279 | sll1342 | sml0008 | sll0379 | sll1194 | sll1823 | ssl2501 |
| sll0495 | sll1513 | slr1279 | slr2075 | slr1349 | sml0008 | sll1194 | sll1676 | sll1056 | ssl2501 |
| sll1425 | sll1513 | slr1279 | slr2076 | sll0593 | sml0008 | sll0927 | sll1194 | slr0520 | ssl2501 |
| sll0502 | sll1513 | sll0416 | slr1279 | sll0220 | sml0008 | sll0996 | sll1194 | sll0144 | ssl2501 |
| sll1513 | slr1703 | slr0156 | slr1279 | sll0899 | sml0008 | sll0844 | sll1194 | sll0467 | ssl2501 |
| sll0078 | sll1513 | slr1279 | slr1641 | slr1756 | sml0008 | sll1194 | sll1615 | slr0711 | ssl2501 |
| sll1513 | slr0557 | slr0542 | slr1279 | sll1085 | sml0008 | sll0202 | sll1194 | sll0754 | ssl2501 |
| sll1513 | slr1884 | sll0534 | slr1279 | sll1931 | sml0008 | sll1194 | slr0902 | sll0569 | ssl2501 |
| sll1513 | slr1031 | slr0165 | slr1279 | sll0083 | sml0008 | sll1144 | sll1194 | sll1277 | ssl2501 |
| sll1513 | slr1793 | sll0030 | slr1279 | slr1755 | sml0008 | sll1194 | slr0017 | sll1110 | ssl2501 |
| sll1513 | slr0633 | slr0847 | slr1279 | sll0057 | sml0008 | sll1194 | slr1424 | sll1865 | ssl2501 |
| sll1513 | slr1278 | slr0553 | slr1279 | sll0017 | sml0008 | sll1194 | slr1423 | slr1228 | ssl2501 |
| sll1513 | slr0783 | slr0812 | slr1279 | sll1185 | sml0008 | sll1194 | sll2010 | slr0808 | ssl2501 |
| sll1198 | sll1513 | slr1279 | slr1347 | slr0839 | sml0008 | sll1194 | slr0528 | slr0082 | ssl2501 |
| sll0204 | sll1513 | slr1279 | slr1348 | sll1876 | sml0008 | sll1194 | slr1351 | slr0742 | ssl2501 |
| sll1513 | sll1750 | slr1279 | slr1791 | sll0900 | sml0008 | sll0622 | sll1194 | sll0098 | ssl2501 |
| sll0420 | sll1513 | sll0594 | slr1279 | slr0608 | sml0008 | sll0631 | sll1194 | slr1646 | ssl2501 |
| sll1513 | slr1256 | slr0550 | slr1279 | slr0652 | sml0008 | sll1194 | slr0787 | slr1130 | ssl2501 |
| sll1513 | sll1639 | sll1058 | slr1279 | slr0084 | sml0008 | sll1194 | sll1852 | slr0080 | ssl2501 |
| sll1513 | slr1899 | slr1279 | slr1665 | sll1893 | sml0008 | sll1194 | slr1090 | slr0551 | ssl2501 |
| sll0643 | sll1513 | slr0536 | slr1279 | slr0500 | sml0008 | sll0902 | sll1194 | sll0145 | ssl2501 |
| sll1513 | slr1844 | slr1279 | slr1874 | slr1560 | sml0008 | sll1194 | slr0661 | sll0708 | ssl2501 |
| sll0459 | sll1513 | sll1776 | slr1279 | sll1988 | sml0008 | sll1194 | slr0526 | slr0679 | ssl2501 |
| sll0865 | sll1513 | sll0848 | slr1279 | slr1289 | sml0008 | sll1194 | sll1249 | slr0722 | ssl2501 |
| sll1513 | slr0733 | sll0897 | slr1279 | sll1556 | sml0008 | sll0892 | sll1194 | slr0072 | ssl2501 |
| sll1459 | sll1513 | sll1933 | slr1279 | sml0008 | ssl3441 | sll0660 | sll1194 | sll1547 | ssl2501 |
| sll0905 | sll1513 | slr0965 | slr1279 | slr0744 | sml0008 | sll1194 | slr1779 | sll1234 | ssl2501 |
| sll0258 | sll0402 | slr1279 | slr1463 | slr0974 | sml0008 | sll1194 | slr0394 | sll0616 | ssl2501 |
| sll0258 | sll0728 | sll1098 | slr1279 | slr1622 | sml0008 | sll1194 | slr2047 | slr2073 | ssl2501 |
| sll0258 | sll0336 | slr0434 | slr1279 | sll1196 | sml0008 | sll1194 | slr0741 | slr1639 | ssl2501 |
| sll0258 | sll1299 | sll1261 | slr1279 | sll0745 | sml0008 | sll1194 | slr1510 | sll1108 | ssl2501 |
| sll0258 | ssl2084 | sll1099 | slr1279 | sll1815 | sml0008 | sll1043 | sll1194 | sll0362 | ssl2501 |
| sll0258 | sll2001 | slr0752 | slr1279 | sll1059 | sml0008 | sll1194 | slr0400 | slr0958 | ssl2501 |
| sll0258 | sll1430 | slr0952 | slr1279 | slr1123 | sml0008 | sll1194 | sll1415 | slr1720 | ssl2501 |
| sll0258 | sll0573 | slr1279 | slr1511 | sll1760 | sml0008 | sll1194 | sll1909 | sll0179 | ssl2501 |

|         |         |         |         |         |         |         |         |         |         |
|---------|---------|---------|---------|---------|---------|---------|---------|---------|---------|
| slI0258 | slr1898 | slI1605 | slr1279 | slI0469 | sml0008 | slI0373 | slI1194 | slI0454 | ssl2501 |
| slI0080 | slI0258 | slI0990 | slr1279 | slr1517 | sml0008 | slI1194 | slr2035 | slI1553 | ssl2501 |
| slI0258 | slr1022 | slI1633 | slr1279 | slI0869 | sml0008 | slI1194 | slr2132 | slr0638 | ssl2501 |
| slI0258 | slI1883 | slr0018 | slr1279 | slr1598 | sml0008 | slI1194 | slr0922 | slr0220 | ssl2501 |
| slI0258 | slr1133 | slI0567 | slr1279 | slI0868 | sml0008 | slI1194 | slr0838 | slr0357 | ssl2501 |
| slI0258 | slr0444 | slr0884 | slr1279 | slr0994 | sml0008 | slI1194 | slI1823 | slI1362 | ssl2501 |
| slI0258 | slr2130 | slI1342 | slr1279 | slI0379 | sml0008 | slI1056 | slI1194 | slr1550 | ssl2501 |
| slI0258 | slI1669 | slr1279 | slr1349 | slI1676 | sml0008 | slI1194 | slr0520 | slI1074 | ssl2501 |
| slI0258 | slr0585 | slI0593 | slr1279 | slI0927 | sml0008 | slI0144 | slI1194 | slr0649 | ssl2501 |
| slI0258 | slr2075 | slI0220 | slr1279 | slI0996 | sml0008 | slI0467 | slI1194 | slI0495 | ssl2501 |
| slI0258 | slr2076 | slI0899 | slr1279 | slI0844 | sml0008 | slI1194 | slr0711 | slI1425 | ssl2501 |
| slI0258 | slI0416 | slr1279 | slr1756 | slI1615 | sml0008 | slI0754 | slI1194 | slI0502 | ssl2501 |
| slI0258 | slr0156 | slI1085 | slr1279 | slI0202 | sml0008 | slI0569 | slI1194 | slr1703 | ssl2501 |
| slI0258 | slr1641 | slI1931 | slr1279 | slr0902 | sml0008 | slI1194 | slI1277 | slI0078 | ssl2501 |
| slI0258 | slr0542 | slI0083 | slr1279 | slI1144 | sml0008 | slI1110 | slI1194 | slr0557 | ssl2501 |
| slI0258 | slI0534 | slr1279 | slr1755 | slr0017 | sml0008 | slI1194 | slI1865 | slr1884 | ssl2501 |
| slI0258 | slr0165 | slI0057 | slr1279 | slr1424 | sml0008 | slI1194 | slr1228 | slr1031 | ssl2501 |
| slI0030 | slI0258 | slI0017 | slr1279 | slr1423 | sml0008 | slI1194 | slr0808 | slr1793 | ssl2501 |
| slI0258 | slr0847 | slI1185 | slr1279 | slI2010 | sml0008 | slI1194 | slr0082 | slr0633 | ssl2501 |
| slI0258 | slr0553 | slr0839 | slr1279 | slr0528 | sml0008 | slI1194 | slr0742 | slr1278 | ssl2501 |
| slI0258 | slr0812 | slI1876 | slr1279 | slr1351 | sml0008 | slI0098 | slI1194 | slr0783 | ssl2501 |
| slI0258 | slr1347 | slI0900 | slr1279 | slI0622 | sml0008 | slI1194 | slr1646 | slI1198 | ssl2501 |
| slI0258 | slr1348 | slr0608 | slr1279 | slI0631 | sml0008 | slI1194 | slr1130 | slI0204 | ssl2501 |
| slI0258 | slr1791 | slr0652 | slr1279 | slr0787 | sml0008 | slI1194 | slr0080 | slI1750 | ssl2501 |
| slI0258 | slI0594 | slr0084 | slr1279 | slI1852 | sml0008 | slI1194 | slr0551 | slI0420 | ssl2501 |
| slI0258 | slr0550 | slI1893 | slr1279 | slr1090 | sml0008 | slI0145 | slI1194 | slr1256 | ssl2501 |
| slI0258 | slI1058 | slr0500 | slr1279 | slI0902 | sml0008 | slI0708 | slI1194 | slI1639 | ssl2501 |
| slI0258 | slr1665 | slr1279 | slr1560 | slr0661 | sml0008 | slI1194 | slr0679 | slr1899 | ssl2501 |
| slI0258 | slr0536 | slI1988 | slr1279 | slr0526 | sml0008 | slI1194 | slr0722 | slI0643 | ssl2501 |
| slI0258 | slr1874 | slr1279 | slr1289 | slI1249 | sml0008 | slI1194 | slr0072 | slr1844 | ssl2501 |
| slI0258 | slI1776 | slI1556 | slr1279 | slI0892 | sml0008 | slI1194 | slI1547 | slI0459 | ssl2501 |
| slI0258 | slI0848 | slr1279 | ssl3441 | slI0660 | sml0008 | slI1194 | slI1234 | slI0865 | ssl2501 |
| slI0258 | slI0897 | slr0744 | slr1279 | slr1779 | sml0008 | slI0616 | slI1194 | slr0733 | ssl2501 |
| slI0258 | slI1933 | slr0974 | slr1279 | slr0394 | sml0008 | slI1194 | slr2073 | slI1459 | ssl2501 |
| slI0258 | slr0965 | slr1279 | slr1622 | slr2047 | sml0008 | slI1194 | slr1639 | slI0905 | ssl2501 |
| slI0258 | slr1463 | slI1196 | slr1279 | slr0741 | sml0008 | slI1108 | slI1194 | slI0402 | slI0412 |
| slI0258 | slI1098 | slI0745 | slr1279 | slr1510 | sml0008 | slI0362 | slI1194 | slI0412 | slI0728 |
| slI0258 | slr0434 | slI1815 | slr1279 | slI1043 | sml0008 | slI1194 | slr0958 | slI0336 | slI0412 |
| slI0258 | slI1261 | slI1059 | slr1279 | slr0400 | sml0008 | slI1194 | slr1720 | slI0412 | slI1299 |
| slI0258 | slI1099 | slr1123 | slr1279 | slI1415 | sml0008 | slI0179 | slI1194 | slI0412 | ssl2084 |
| slI0258 | slr0752 | slI1760 | slr1279 | slI1909 | sml0008 | slI0454 | slI1194 | slI0412 | slI2001 |
| slI0258 | slr0952 | slI0469 | slr1279 | slI0373 | sml0008 | slI1194 | slI1553 | slI0412 | slI1430 |
| slI0258 | slr1511 | slr1279 | slr1517 | slr2035 | sml0008 | slI1194 | slr0638 | slI0412 | slI0573 |
| slI0258 | slI1605 | slI0869 | slr1279 | slr2132 | sml0008 | slI1194 | slr0220 | slI0412 | slr1898 |
| slI0258 | slI0990 | slr1279 | slr1598 | slr0922 | sml0008 | slI1194 | slr0357 | slI0080 | slI0412 |
| slI0258 | slI1633 | slI0868 | slr1279 | slr0838 | sml0008 | slI1194 | slI1362 | slI0412 | slr1022 |
| slI0258 | slr0018 | slr0994 | slr1279 | slI1823 | sml0008 | slI1194 | slr1550 | slI0412 | slI1883 |
| slI0258 | slI0567 | slI0379 | slr1279 | slI1056 | sml0008 | slI1074 | slI1194 | slI0412 | slr1133 |
| slI0258 | slr0884 | slI1676 | slr1279 | slr0520 | sml0008 | slI1194 | slr0649 | slI0412 | slr0444 |
| slI0258 | slI1342 | slI0927 | slr1279 | slI0144 | sml0008 | slI0495 | slI1194 | slI0412 | slr2130 |
| slI0258 | slr1349 | slI0996 | slr1279 | slI0467 | sml0008 | slI1194 | slI1425 | slI0412 | slI1669 |

|         |         |         |         |         |         |         |         |         |         |
|---------|---------|---------|---------|---------|---------|---------|---------|---------|---------|
| sll0258 | sll0593 | sll0844 | slr1279 | slr0711 | sml0008 | sll0502 | sll1194 | sll0412 | slr0585 |
| sll0220 | sll0258 | sll1615 | slr1279 | sll0754 | sml0008 | sll1194 | slr1703 | sll0412 | slr2075 |
| sll0258 | sll0899 | sll0202 | slr1279 | sll0569 | sml0008 | sll0078 | sll1194 | sll0412 | slr2076 |
| sll0258 | slr1756 | slr0902 | slr1279 | sll1277 | sml0008 | sll1194 | slr0557 | sll0412 | sll0416 |
| sll0258 | sll1085 | sll1144 | slr1279 | sll1110 | sml0008 | sll1194 | slr1884 | sll0412 | slr0156 |
| sll0258 | sll1931 | slr0017 | slr1279 | sll1865 | sml0008 | sll1194 | slr1031 | sll0412 | slr1641 |
| sll0083 | sll0258 | slr1279 | slr1424 | slr1228 | sml0008 | sll1194 | slr1793 | sll0412 | slr0542 |
| sll0258 | slr1755 | slr1279 | slr1423 | slr0808 | sml0008 | sll1194 | slr0633 | sll0412 | sll0534 |
| sll0057 | sll0258 | sll2010 | slr1279 | slr0082 | sml0008 | sll1194 | slr1278 | sll0412 | slr0165 |
| sll0017 | sll0258 | slr0528 | slr1279 | slr0742 | sml0008 | sll1194 | slr0783 | sll0030 | sll0412 |
| sll0258 | sll1185 | slr1279 | slr1351 | sll0098 | sml0008 | sll1194 | sll1198 | sll0412 | slr0847 |
| sll0258 | slr0839 | sll0622 | slr1279 | slr1646 | sml0008 | sll0204 | sll1194 | sll0412 | slr0553 |
| sll0258 | sll1876 | sll0631 | slr1279 | slr1130 | sml0008 | sll1194 | sll1750 | sll0412 | slr0812 |
| sll0258 | sll0900 | slr0787 | slr1279 | slr0080 | sml0008 | sll0420 | sll1194 | sll0412 | slr1347 |
| sll0258 | slr0608 | sll1852 | slr1279 | slr0551 | sml0008 | sll1194 | slr1256 | sll0412 | slr1348 |
| sll0258 | slr0652 | slr1090 | slr1279 | sll0145 | sml0008 | sll1194 | sll1639 | sll0412 | slr1791 |
| sll0258 | slr0084 | sll0902 | slr1279 | sll0708 | sml0008 | sll1194 | slr1899 | sll0412 | sll0594 |
| sll0258 | sll1893 | slr0661 | slr1279 | slr0679 | sml0008 | sll0643 | sll1194 | sll0412 | slr0550 |
| sll0258 | slr0500 | slr0526 | slr1279 | slr0722 | sml0008 | sll1194 | slr1844 | sll0412 | sll1058 |
| sll0258 | slr1560 | sll1249 | slr1279 | slr0072 | sml0008 | sll0459 | sll1194 | sll0412 | slr1665 |
| sll0258 | sll1988 | sll0892 | slr1279 | sll1547 | sml0008 | sll0865 | sll1194 | sll0412 | slr0536 |
| sll0258 | slr1289 | sll0660 | slr1279 | sll1234 | sml0008 | sll1194 | slr0733 | sll0412 | slr1874 |
| sll0258 | sll1556 | slr1279 | slr1779 | sll0616 | sml0008 | sll1194 | sll1459 | sll0412 | sll1776 |
| sll0258 | ssl3441 | slr0394 | slr1279 | slr2073 | sml0008 | sll0905 | sll1194 | sll0412 | sll0848 |
| sll0258 | slr0744 | slr1279 | slr2047 | slr1639 | sml0008 | sll0402 | sml0002 | sll0412 | sll0897 |
| sll0258 | slr0974 | slr0741 | slr1279 | sll1108 | sml0008 | sll0728 | sml0002 | sll0412 | sll1933 |
| sll0258 | slr1622 | slr1279 | slr1510 | sll0362 | sml0008 | sll0336 | sml0002 | sll0412 | slr0965 |
| sll0258 | sll1196 | sll1043 | slr1279 | slr0958 | sml0008 | sll1299 | sml0002 | sll0412 | slr1463 |
| sll0258 | sll0745 | slr0400 | slr1279 | slr1720 | sml0008 | sml0002 | ssl2084 | sll0412 | sll1098 |
| sll0258 | sll1815 | sll1415 | slr1279 | sll0179 | sml0008 | sll2001 | sml0002 | sll0412 | slr0434 |
| sll0258 | sll1059 | sll1909 | slr1279 | sll0454 | sml0008 | sll1430 | sml0002 | sll0412 | sll1261 |
| sll0258 | slr1123 | sll0373 | slr1279 | sll1553 | sml0008 | sll0573 | sml0002 | sll0412 | sll1099 |
| sll0258 | sll1760 | slr1279 | slr2035 | slr0638 | sml0008 | slr1898 | sml0002 | sll0412 | slr0752 |
| sll0258 | sll0469 | slr1279 | slr2132 | slr0220 | sml0008 | sll0080 | sml0002 | sll0412 | slr0952 |
| sll0258 | slr1517 | slr0922 | slr1279 | slr0357 | sml0008 | slr1022 | sml0002 | sll0412 | slr1511 |
| sll0258 | sll0869 | slr0838 | slr1279 | sll1362 | sml0008 | sll1883 | sml0002 | sll0412 | sll1605 |
| sll0258 | slr1598 | sll1823 | slr1279 | slr1550 | sml0008 | slr1133 | sml0002 | sll0412 | sll0990 |
| sll0258 | sll0868 | sll1056 | slr1279 | sll1074 | sml0008 | slr0444 | sml0002 | sll0412 | sll1633 |
| sll0258 | slr0994 | slr0520 | slr1279 | slr0649 | sml0008 | slr2130 | sml0002 | sll0412 | slr0018 |
| sll0258 | sll0379 | sll0144 | slr1279 | sll0495 | sml0008 | sll1669 | sml0002 | sll0412 | sll0567 |
| sll0258 | sll1676 | sll0467 | slr1279 | sll1425 | sml0008 | slr0585 | sml0002 | sll0412 | slr0884 |
| sll0258 | sll0927 | slr0711 | slr1279 | sll0502 | sml0008 | slr2075 | sml0002 | sll0412 | sll1342 |
| sll0258 | sll0996 | sll0754 | slr1279 | slr1703 | sml0008 | slr2076 | sml0002 | sll0412 | slr1349 |
| sll0258 | sll0844 | sll0569 | slr1279 | sll0078 | sml0008 | sll0416 | sml0002 | sll0412 | sll0593 |
| sll0258 | sll1615 | sll1277 | slr1279 | slr0557 | sml0008 | slr0156 | sml0002 | sll0220 | sll0412 |
| sll0202 | sll0258 | sll1110 | slr1279 | slr1884 | sml0008 | slr1641 | sml0002 | sll0412 | sll0899 |
| sll0258 | slr0902 | sll1865 | slr1279 | slr1031 | sml0008 | slr0542 | sml0002 | sll0412 | slr1756 |
| sll0258 | sll1144 | slr1228 | slr1279 | slr1793 | sml0008 | sll0534 | sml0002 | sll0412 | sll1085 |
| sll0258 | slr0017 | slr0808 | slr1279 | slr0633 | sml0008 | slr0165 | sml0002 | sll0412 | sll1931 |
| sll0258 | slr1424 | slr0082 | slr1279 | slr1278 | sml0008 | sll0030 | sml0002 | sll0083 | sll0412 |
| sll0258 | slr1423 | slr0742 | slr1279 | slr0783 | sml0008 | slr0847 | sml0002 | sll0412 | slr1755 |



|         |         |         |         |         |         |         |         |         |         |
|---------|---------|---------|---------|---------|---------|---------|---------|---------|---------|
| slI0258 | slI2010 | slI0098 | slr1279 | slI1198 | sml0008 | slr0553 | sml0002 | slI0057 | slI0412 |
| slI0258 | slr0528 | slr1279 | slr1646 | slI0204 | sml0008 | slr0812 | sml0002 | slI0017 | slI0412 |
| slI0258 | slr1351 | slr1130 | slr1279 | slI1750 | sml0008 | slr1347 | sml0002 | slI0412 | slI1185 |
| slI0258 | slI0622 | slr0080 | slr1279 | slI0420 | sml0008 | slr1348 | sml0002 | slI0412 | slr0839 |
| slI0258 | slI0631 | slr0551 | slr1279 | slr1256 | sml0008 | slr1791 | sml0002 | slI0412 | slI1876 |
| slI0258 | slr0787 | slI0145 | slr1279 | slI1639 | sml0008 | slI0594 | sml0002 | slI0412 | slI0900 |
| slI0258 | slI1852 | slI0708 | slr1279 | slr1899 | sml0008 | slr0550 | sml0002 | slI0412 | slr0608 |
| slI0258 | slr1090 | slr0679 | slr1279 | slI0643 | sml0008 | slI1058 | sml0002 | slI0412 | slr0652 |
| slI0258 | slI0902 | slr0722 | slr1279 | slr1844 | sml0008 | slr1665 | sml0002 | slI0412 | slr0084 |
| slI0258 | slr0661 | slr0072 | slr1279 | slI0459 | sml0008 | slr0536 | sml0002 | slI0412 | slI1893 |
| slI0258 | slr0526 | slI1547 | slr1279 | slI0865 | sml0008 | slr1874 | sml0002 | slI0412 | slr0500 |
| slI0258 | slI1249 | slI1234 | slr1279 | slr0733 | sml0008 | slI1776 | sml0002 | slI0412 | slr1560 |
| slI0258 | slI0892 | slI0616 | slr1279 | slI1459 | sml0008 | slI0848 | sml0002 | slI0412 | slI1988 |
| slI0258 | slI0660 | slr1279 | slr2073 | slI0905 | sml0008 | slI0897 | sml0002 | slI0412 | slr1289 |
| slI0258 | slr1779 | slr1279 | slr1639 | slI0402 | ssr0390 | slI1933 | sml0002 | slI0412 | slI1556 |
| slI0258 | slr0394 | slI1108 | slr1279 | slI0728 | ssr0390 | slr0965 | sml0002 | slI0412 | ssl3441 |
| slI0258 | slr2047 | slI0362 | slr1279 | slI0336 | ssr0390 | slr1463 | sml0002 | slI0412 | slr0744 |
| slI0258 | slr0741 | slr0958 | slr1279 | slI1299 | ssr0390 | slI1098 | sml0002 | slI0412 | slr0974 |
| slI0258 | slr1510 | slr1279 | slr1720 | ssl2084 | ssr0390 | slr0434 | sml0002 | slI0412 | slr1622 |
| slI0258 | slI1043 | slI0179 | slr1279 | slI2001 | ssr0390 | slI1261 | sml0002 | slI0412 | slI1196 |
| slI0258 | slr0400 | slI0454 | slr1279 | slI1430 | ssr0390 | slI1099 | sml0002 | slI0412 | slI0745 |
| slI0258 | slI1415 | slI1553 | slr1279 | slI0573 | ssr0390 | slr0752 | sml0002 | slI0412 | slI1815 |
| slI0258 | slI1909 | slr0638 | slr1279 | slr1898 | ssr0390 | slr0952 | sml0002 | slI0412 | slI1059 |
| slI0258 | slI0373 | slr0220 | slr1279 | slI0080 | ssr0390 | slr1511 | sml0002 | slI0412 | slr1123 |
| slI0258 | slr2035 | slr0357 | slr1279 | slr1022 | ssr0390 | slI1605 | sml0002 | slI0412 | slI1760 |
| slI0258 | slr2132 | slI1362 | slr1279 | slI1883 | ssr0390 | slI0990 | sml0002 | slI0412 | slI0469 |
| slI0258 | slr0922 | slr1279 | slr1550 | slr1133 | ssr0390 | slI1633 | sml0002 | slI0412 | slr1517 |
| slI0258 | slr0838 | slI1074 | slr1279 | slr0444 | ssr0390 | slr0018 | sml0002 | slI0412 | slI0869 |
| slI0258 | slI1823 | slr0649 | slr1279 | slr2130 | ssr0390 | slI0567 | sml0002 | slI0412 | slr1598 |
| slI0258 | slI1056 | slI0495 | slr1279 | slI1669 | ssr0390 | slr0884 | sml0002 | slI0412 | slI0868 |
| slI0258 | slr0520 | slI1425 | slr1279 | slr0585 | ssr0390 | slI1342 | sml0002 | slI0412 | slr0994 |
| slI0144 | slI0258 | slI0502 | slr1279 | slr2075 | ssr0390 | slr1349 | sml0002 | slI0379 | slI0412 |
| slI0258 | slI0467 | slr1279 | slr1703 | slr2076 | ssr0390 | slI0593 | sml0002 | slI0412 | slI1676 |
| slI0258 | slr0711 | slI0078 | slr1279 | slI0416 | ssr0390 | slI0220 | sml0002 | slI0412 | slI0927 |
| slI0258 | slI0754 | slr0557 | slr1279 | slr0156 | ssr0390 | slI0899 | sml0002 | slI0412 | slI0996 |
| slI0258 | slI0569 | slr1279 | slr1884 | slr1641 | ssr0390 | slr1756 | sml0002 | slI0412 | slI0844 |
| slI0258 | slI1277 | slr1031 | slr1279 | slr0542 | ssr0390 | slI1085 | sml0002 | slI0412 | slI1615 |
| slI0258 | slI1110 | slr1279 | slr1793 | slI0534 | ssr0390 | slI1931 | sml0002 | slI0202 | slI0412 |
| slI0258 | slI1865 | slr0633 | slr1279 | slr0165 | ssr0390 | slI0083 | sml0002 | slI0412 | slr0902 |
| slI0258 | slr1228 | slr1278 | slr1279 | slI0030 | ssr0390 | slr1755 | sml0002 | slI0412 | slI1144 |
| slI0258 | slr0808 | slr0783 | slr1279 | slr0847 | ssr0390 | slI0057 | sml0002 | slI0412 | slr0017 |
| slI0258 | slr0082 | slI1198 | slr1279 | slr0553 | ssr0390 | slI0017 | sml0002 | slI0412 | slr1424 |
| slI0258 | slr0742 | slI0204 | slr1279 | slr0812 | ssr0390 | slI1185 | sml0002 | slI0412 | slr1423 |
| slI0098 | slI0258 | slI1750 | slr1279 | slr1347 | ssr0390 | slr0839 | sml0002 | slI0412 | slI2010 |
| slI0258 | slr1646 | slI0420 | slr1279 | slr1348 | ssr0390 | slI1876 | sml0002 | slI0412 | slr0528 |
| slI0258 | slr1130 | slr1256 | slr1279 | slr1791 | ssr0390 | slI0900 | sml0002 | slI0412 | slr1351 |
| slI0258 | slr0080 | slI1639 | slr1279 | slI0594 | ssr0390 | slr0608 | sml0002 | slI0412 | slI0622 |
| slI0258 | slr0551 | slr1279 | slr1899 | slr0550 | ssr0390 | slr0652 | sml0002 | slI0412 | slI0631 |
| slI0145 | slI0258 | slI0643 | slr1279 | slI1058 | ssr0390 | slr0084 | sml0002 | slI0412 | slr0787 |
| slI0258 | slI0708 | slr1279 | slr1844 | slr1665 | ssr0390 | slI1893 | sml0002 | slI0412 | slI1852 |
| slI0258 | slr0679 | slI0459 | slr1279 | slr0536 | ssr0390 | slr0500 | sml0002 | slI0412 | slr1090 |

|         |         |         |         |         |         |         |         |         |         |
|---------|---------|---------|---------|---------|---------|---------|---------|---------|---------|
| slI0258 | slr0722 | slI0865 | slr1279 | slr1874 | ssr0390 | slr1560 | sml0002 | slI0412 | slI0902 |
| slI0258 | slr0072 | slr0733 | slr1279 | slI1776 | ssr0390 | slI1988 | sml0002 | slI0412 | slr0661 |
| slI0258 | slI1547 | slI1459 | slr1279 | slI0848 | ssr0390 | slr1289 | sml0002 | slI0412 | slr0526 |
| slI0258 | slI1234 | slI0905 | slr1279 | slI0897 | ssr0390 | slI1556 | sml0002 | slI0412 | slI1249 |
| slI0258 | slI0616 | slI0402 | slr0331 | slI1933 | ssr0390 | sml0002 | ssl3441 | slI0412 | slI0892 |
| slI0258 | slr2073 | slI0728 | slr0331 | slr0965 | ssr0390 | slr0744 | sml0002 | slI0412 | slI0660 |
| slI0258 | slr1639 | slI0336 | slr0331 | slr1463 | ssr0390 | slr0974 | sml0002 | slI0412 | slr1779 |
| slI0258 | slI1108 | slI1299 | slr0331 | slI1098 | ssr0390 | slr1622 | sml0002 | slI0412 | slr0394 |
| slI0258 | slI0362 | slr0331 | ssl2084 | slr0434 | ssr0390 | slI1196 | sml0002 | slI0412 | slr2047 |
| slI0258 | slr0958 | slI2001 | slr0331 | slI1261 | ssr0390 | slI0745 | sml0002 | slI0412 | slr0741 |
| slI0258 | slr1720 | slI1430 | slr0331 | slI1099 | ssr0390 | slI1815 | sml0002 | slI0412 | slr1510 |
| slI0179 | slI0258 | slI0573 | slr0331 | slr0752 | ssr0390 | slI1059 | sml0002 | slI0412 | slI1043 |
| slI0258 | slI0454 | slr0331 | slr1898 | slr0952 | ssr0390 | slr1123 | sml0002 | slI0412 | slr0400 |
| slI0258 | slI1553 | slI0080 | slr0331 | slr1511 | ssr0390 | slI1760 | sml0002 | slI0412 | slI1415 |
| slI0258 | slr0638 | slr0331 | slr1022 | slI1605 | ssr0390 | slI0469 | sml0002 | slI0412 | slI1909 |
| slI0258 | slr0220 | slI1883 | slr0331 | slI0990 | ssr0390 | slr1517 | sml0002 | slI0373 | slI0412 |
| slI0258 | slr0357 | slr0331 | slr1133 | slI1633 | ssr0390 | slI0869 | sml0002 | slI0412 | slr2035 |
| slI0258 | slI1362 | slr0331 | slr0444 | slr0018 | ssr0390 | slr1598 | sml0002 | slI0412 | slr2132 |
| slI0258 | slr1550 | slr0331 | slr2130 | slI0567 | ssr0390 | slI0868 | sml0002 | slI0412 | slr0922 |
| slI0258 | slI1074 | slI1669 | slr0331 | slr0884 | ssr0390 | slr0994 | sml0002 | slI0412 | slr0838 |
| slI0258 | slr0649 | slr0331 | slr0585 | slI1342 | ssr0390 | slI0379 | sml0002 | slI0412 | slI1823 |
| slI0258 | slI0495 | slr0331 | slr2075 | slr1349 | ssr0390 | slI1676 | sml0002 | slI0412 | slI1056 |
| slI0258 | slI1425 | slr0331 | slr2076 | slI0593 | ssr0390 | slI0927 | sml0002 | slI0412 | slr0520 |
| slI0258 | slI0502 | slI0416 | slr0331 | slI0220 | ssr0390 | slI0996 | sml0002 | slI0144 | slI0412 |
| slI0258 | slr1703 | slr0156 | slr0331 | slI0899 | ssr0390 | slI0844 | sml0002 | slI0412 | slI0467 |
| slI0078 | slI0258 | slr0331 | slr1641 | slr1756 | ssr0390 | slI1615 | sml0002 | slI0412 | slr0711 |
| slI0258 | slr0557 | slr0331 | slr0542 | slI1085 | ssr0390 | slI0202 | sml0002 | slI0412 | slI0754 |
| slI0258 | slr1884 | slI0534 | slr0331 | slI1931 | ssr0390 | slr0902 | sml0002 | slI0412 | slI0569 |
| slI0258 | slr1031 | slr0165 | slr0331 | slI0083 | ssr0390 | slI1144 | sml0002 | slI0412 | slI1277 |
| slI0258 | slr1793 | slI0030 | slr0331 | slr1755 | ssr0390 | slr0017 | sml0002 | slI0412 | slI1110 |
| slI0258 | slr0633 | slr0331 | slr0847 | slI0057 | ssr0390 | slr1424 | sml0002 | slI0412 | slI1865 |
| slI0258 | slr1278 | slr0331 | slr0553 | slI0017 | ssr0390 | slr1423 | sml0002 | slI0412 | slr1228 |
| slI0258 | slr0783 | slr0331 | slr0812 | slI1185 | ssr0390 | slI2010 | sml0002 | slI0412 | slr0808 |
| slI0258 | slI1198 | slr0331 | slr1347 | slr0839 | ssr0390 | slr0528 | sml0002 | slI0412 | slr0082 |
| slI0204 | slI0258 | slr0331 | slr1348 | slI1876 | ssr0390 | slr1351 | sml0002 | slI0412 | slr0742 |
| slI0258 | slI1750 | slr0331 | slr1791 | slI0900 | ssr0390 | slI0622 | sml0002 | slI0098 | slI0412 |
| slI0258 | slI0420 | slI0594 | slr0331 | slr0608 | ssr0390 | slI0631 | sml0002 | slI0412 | slr1646 |
| slI0258 | slr1256 | slr0331 | slr0550 | slr0652 | ssr0390 | slr0787 | sml0002 | slI0412 | slr1130 |
| slI0258 | slI1639 | slI1058 | slr0331 | slr0084 | ssr0390 | slI1852 | sml0002 | slI0412 | slr0080 |
| slI0258 | slr1899 | slr0331 | slr1665 | slI1893 | ssr0390 | slr1090 | sml0002 | slI0412 | slr0551 |
| slI0258 | slI0643 | slr0331 | slr0536 | slr0500 | ssr0390 | slI0902 | sml0002 | slI0145 | slI0412 |
| slI0258 | slr1844 | slr0331 | slr1874 | slr1560 | ssr0390 | slr0661 | sml0002 | slI0412 | slI0708 |
| slI0258 | slI0459 | slI1776 | slr0331 | slI1988 | ssr0390 | slr0526 | sml0002 | slI0412 | slr0679 |
| slI0258 | slI0865 | slI0848 | slr0331 | slr1289 | ssr0390 | slI1249 | sml0002 | slI0412 | slr0722 |
| slI0258 | slr0733 | slI0897 | slr0331 | slI1556 | ssr0390 | slI0892 | sml0002 | slI0412 | slr0072 |
| slI0258 | slI1459 | slI1933 | slr0331 | ssl3441 | ssr0390 | slI0660 | sml0002 | slI0412 | slI1547 |
| slI0258 | slI0905 | slr0331 | slr0965 | slr0744 | ssr0390 | slr1779 | sml0002 | slI0412 | slI1234 |
| slI0402 | slr0342 | slr0331 | slr1463 | slr0974 | ssr0390 | slr0394 | sml0002 | slI0412 | slI0616 |
| slI0728 | slr0342 | slI1098 | slr0331 | slr1622 | ssr0390 | slr2047 | sml0002 | slI0412 | slr2073 |
| slI0336 | slr0342 | slr0331 | slr0434 | slI1196 | ssr0390 | slr0741 | sml0002 | slI0412 | slr1639 |
| slI1299 | slr0342 | slI1261 | slr0331 | slI0745 | ssr0390 | slr1510 | sml0002 | slI0412 | slI1108 |

|         |         |         |         |         |         |         |         |         |         |
|---------|---------|---------|---------|---------|---------|---------|---------|---------|---------|
| slr0342 | ssl2084 | sll1099 | slr0331 | sll1815 | ssr0390 | sll1043 | sml0002 | sll0362 | sll0412 |
| sll2001 | slr0342 | slr0331 | slr0752 | sll1059 | ssr0390 | slr0400 | sml0002 | sll0412 | slr0958 |
| sll1430 | slr0342 | slr0331 | slr0952 | slr1123 | ssr0390 | sll1415 | sml0002 | sll0412 | slr1720 |
| sll0573 | slr0342 | slr0331 | slr1511 | sll1760 | ssr0390 | sll1909 | sml0002 | sll0179 | sll0412 |
| slr0342 | slr1898 | sll1605 | slr0331 | sll0469 | ssr0390 | sll0373 | sml0002 | sll0412 | sll0454 |
| sll0080 | slr0342 | sll0990 | slr0331 | slr1517 | ssr0390 | slr2035 | sml0002 | sll0412 | sll1553 |
| slr0342 | slr1022 | sll1633 | slr0331 | sll0869 | ssr0390 | slr2132 | sml0002 | sll0412 | slr0638 |
| sll1883 | slr0342 | slr0018 | slr0331 | slr1598 | ssr0390 | slr0922 | sml0002 | sll0412 | slr0220 |
| slr0342 | slr1133 | sll0567 | slr0331 | sll0868 | ssr0390 | slr0838 | sml0002 | sll0412 | slr0357 |
| slr0342 | slr0444 | slr0331 | slr0884 | slr0994 | ssr0390 | sll1823 | sml0002 | sll0412 | sll1362 |
| slr0342 | slr2130 | sll1342 | slr0331 | sll0379 | ssr0390 | sll1056 | sml0002 | sll0412 | slr1550 |
| sll1669 | slr0342 | slr0331 | slr1349 | sll1676 | ssr0390 | slr0520 | sml0002 | sll0412 | sll1074 |
| slr0342 | slr0585 | sll0593 | slr0331 | sll0927 | ssr0390 | sll0144 | sml0002 | sll0412 | slr0649 |
| slr0342 | slr2075 | sll0220 | slr0331 | sll0996 | ssr0390 | sll0467 | sml0002 | sll0412 | sll0495 |
| slr0342 | slr2076 | sll0899 | slr0331 | sll0844 | ssr0390 | slr0711 | sml0002 | sll0412 | sll1425 |
| sll0416 | slr0342 | slr0331 | slr1756 | sll1615 | ssr0390 | sll0754 | sml0002 | sll0412 | sll0502 |
| slr0156 | slr0342 | sll1085 | slr0331 | sll0202 | ssr0390 | sll0569 | sml0002 | sll0412 | slr1703 |
| slr0342 | slr1641 | sll1931 | slr0331 | slr0902 | ssr0390 | sll1277 | sml0002 | sll0078 | sll0412 |
| slr0342 | slr0542 | sll0083 | slr0331 | sll1144 | ssr0390 | sll1110 | sml0002 | sll0412 | slr0557 |
| sll0534 | slr0342 | slr0331 | slr1755 | slr0017 | ssr0390 | sll1865 | sml0002 | sll0412 | slr1884 |
| slr0165 | slr0342 | sll0057 | slr0331 | slr1424 | ssr0390 | slr1228 | sml0002 | sll0412 | slr1031 |
| sll0030 | slr0342 | sll0017 | slr0331 | slr1423 | ssr0390 | slr0808 | sml0002 | sll0412 | slr1793 |
| slr0342 | slr0847 | sll1185 | slr0331 | sll2010 | ssr0390 | slr0082 | sml0002 | sll0412 | slr0633 |
| slr0342 | slr0553 | slr0331 | slr0839 | slr0528 | ssr0390 | slr0742 | sml0002 | sll0412 | slr1278 |
| slr0342 | slr0812 | sll1876 | slr0331 | slr1351 | ssr0390 | sll0098 | sml0002 | sll0412 | slr0783 |
| slr0342 | slr1347 | sll0900 | slr0331 | sll0622 | ssr0390 | slr1646 | sml0002 | sll0412 | sll1198 |
| slr0342 | slr1348 | slr0331 | slr0608 | sll0631 | ssr0390 | slr1130 | sml0002 | sll0204 | sll0412 |
| slr0342 | slr1791 | slr0331 | slr0652 | slr0787 | ssr0390 | slr0080 | sml0002 | sll0412 | sll1750 |
| sll0594 | slr0342 | slr0084 | slr0331 | sll1852 | ssr0390 | slr0551 | sml0002 | sll0412 | sll0420 |
| slr0342 | slr0550 | sll1893 | slr0331 | slr1090 | ssr0390 | sll0145 | sml0002 | sll0412 | slr1256 |
| sll1058 | slr0342 | slr0331 | slr0500 | sll0902 | ssr0390 | sll0708 | sml0002 | sll0412 | sll1639 |
| slr0342 | slr1665 | slr0331 | slr1560 | slr0661 | ssr0390 | slr0679 | sml0002 | sll0412 | slr1899 |
| slr0342 | slr0536 | sll1988 | slr0331 | slr0526 | ssr0390 | slr0722 | sml0002 | sll0412 | sll0643 |
| slr0342 | slr1874 | slr0331 | slr1289 | sll1249 | ssr0390 | slr0072 | sml0002 | sll0412 | slr1844 |
| sll1776 | slr0342 | sll1556 | slr0331 | sll0892 | ssr0390 | sll1547 | sml0002 | sll0412 | sll0459 |
| sll0848 | slr0342 | slr0331 | ssl3441 | sll0660 | ssr0390 | sll1234 | sml0002 | sll0412 | sll0865 |
| sll0897 | slr0342 | slr0331 | slr0744 | slr1779 | ssr0390 | sll0616 | sml0002 | sll0412 | slr0733 |
| sll1933 | slr0342 | slr0331 | slr0974 | slr0394 | ssr0390 | slr2073 | sml0002 | sll0412 | sll1459 |
| slr0342 | slr0965 | slr0331 | slr1622 | slr2047 | ssr0390 | slr1639 | sml0002 | sll0412 | sll0905 |
| slr0342 | slr1463 | sll1196 | slr0331 | slr0741 | ssr0390 | sll1108 | sml0002 | sll0402 | slr0575 |
| sll1098 | slr0342 | sll0745 | slr0331 | slr1510 | ssr0390 | sll0362 | sml0002 | sll0728 | slr0575 |
| slr0342 | slr0434 | sll1815 | slr0331 | sll1043 | ssr0390 | slr0958 | sml0002 | sll0336 | slr0575 |
| sll1261 | slr0342 | sll1059 | slr0331 | slr0400 | ssr0390 | slr1720 | sml0002 | sll1299 | slr0575 |
| sll1099 | slr0342 | slr0331 | slr1123 | sll1415 | ssr0390 | sll0179 | sml0002 | slr0575 | ssl2084 |
| slr0342 | slr0752 | sll1760 | slr0331 | sll1909 | ssr0390 | sll0454 | sml0002 | sll2001 | slr0575 |
| slr0342 | slr0952 | sll0469 | slr0331 | sll0373 | ssr0390 | sll1553 | sml0002 | sll1430 | slr0575 |
| slr0342 | slr1511 | slr0331 | slr1517 | slr2035 | ssr0390 | slr0638 | sml0002 | sll0573 | slr0575 |
| sll1605 | slr0342 | sll0869 | slr0331 | slr2132 | ssr0390 | slr0220 | sml0002 | slr0575 | slr1898 |
| sll0990 | slr0342 | slr0331 | slr1598 | slr0922 | ssr0390 | slr0357 | sml0002 | sll0080 | slr0575 |
| sll1633 | slr0342 | sll0868 | slr0331 | slr0838 | ssr0390 | sll1362 | sml0002 | slr0575 | slr1022 |
| slr0018 | slr0342 | slr0331 | slr0994 | sll1823 | ssr0390 | slr1550 | sml0002 | sll1883 | slr0575 |

|         |         |         |         |         |         |         |         |         |         |
|---------|---------|---------|---------|---------|---------|---------|---------|---------|---------|
| slI0567 | slr0342 | slI0379 | slr0331 | slI1056 | ssr0390 | slI1074 | sml0002 | slr0575 | slr1133 |
| slr0342 | slr0884 | slI1676 | slr0331 | slr0520 | ssr0390 | slr0649 | sml0002 | slr0444 | slr0575 |
| slI1342 | slr0342 | slI0927 | slr0331 | slI0144 | ssr0390 | slI0495 | sml0002 | slr0575 | slr2130 |
| slr0342 | slr1349 | slI0996 | slr0331 | slI0467 | ssr0390 | slI1425 | sml0002 | slI1669 | slr0575 |
| slI0593 | slr0342 | slI0844 | slr0331 | slr0711 | ssr0390 | slI0502 | sml0002 | slr0575 | slr0585 |
| slI0220 | slr0342 | slI1615 | slr0331 | slI0754 | ssr0390 | slr1703 | sml0002 | slr0575 | slr2075 |
| slI0899 | slr0342 | slI0202 | slr0331 | slI0569 | ssr0390 | slI0078 | sml0002 | slr0575 | slr2076 |
| slr0342 | slr1756 | slr0331 | slr0902 | slI1277 | ssr0390 | slr0557 | sml0002 | slI0416 | slr0575 |
| slI1085 | slr0342 | slI1144 | slr0331 | slI1110 | ssr0390 | slr1884 | sml0002 | slr0156 | slr0575 |
| slI1931 | slr0342 | slr0017 | slr0331 | slI1865 | ssr0390 | slr1031 | sml0002 | slr0575 | slr1641 |
| slI0083 | slr0342 | slr0331 | slr1424 | slr1228 | ssr0390 | slr1793 | sml0002 | slr0542 | slr0575 |
| slr0342 | slr1755 | slr0331 | slr1423 | slr0808 | ssr0390 | slr0633 | sml0002 | slI0534 | slr0575 |
| slI0057 | slr0342 | slI2010 | slr0331 | slr0082 | ssr0390 | slr1278 | sml0002 | slr0165 | slr0575 |
| slI0017 | slr0342 | slr0331 | slr0528 | slr0742 | ssr0390 | slr0783 | sml0002 | slI0030 | slr0575 |
| slI1185 | slr0342 | slr0331 | slr1351 | slI0098 | ssr0390 | slI1198 | sml0002 | slr0575 | slr0847 |
| slr0342 | slr0839 | slI0622 | slr0331 | slr1646 | ssr0390 | slI0204 | sml0002 | slr0553 | slr0575 |
| slI1876 | slr0342 | slI0631 | slr0331 | slr1130 | ssr0390 | slI1750 | sml0002 | slr0575 | slr0812 |
| slI0900 | slr0342 | slr0331 | slr0787 | slr0080 | ssr0390 | slI0420 | sml0002 | slr0575 | slr1347 |
| slr0342 | slr0608 | slI1852 | slr0331 | slr0551 | ssr0390 | slr1256 | sml0002 | slr0575 | slr1348 |
| slr0342 | slr0652 | slr0331 | slr1090 | slI0145 | ssr0390 | slI1639 | sml0002 | slr0575 | slr1791 |
| slr0084 | slr0342 | slI0902 | slr0331 | slI0708 | ssr0390 | slr1899 | sml0002 | slI0594 | slr0575 |
| slI1893 | slr0342 | slr0331 | slr0661 | slr0679 | ssr0390 | slI0643 | sml0002 | slr0550 | slr0575 |
| slr0342 | slr0500 | slr0331 | slr0526 | slr0722 | ssr0390 | slr1844 | sml0002 | slI1058 | slr0575 |
| slr0342 | slr1560 | slI1249 | slr0331 | slr0072 | ssr0390 | slI0459 | sml0002 | slr0575 | slr1665 |
| slI1988 | slr0342 | slI0892 | slr0331 | slI1547 | ssr0390 | slI0865 | sml0002 | slr0536 | slr0575 |
| slr0342 | slr1289 | slI0660 | slr0331 | slI1234 | ssr0390 | slr0733 | sml0002 | slr0575 | slr1874 |
| slI1556 | slr0342 | slr0331 | slr1779 | slI0616 | ssr0390 | slI1459 | sml0002 | slI1776 | slr0575 |
| slr0342 | ssl3441 | slr0331 | slr0394 | slr2073 | ssr0390 | slI0905 | sml0002 | slI0848 | slr0575 |
| slr0342 | slr0744 | slr0331 | slr2047 | slr1639 | ssr0390 | slI0402 | sml0007 | slI0897 | slr0575 |
| slr0342 | slr0974 | slr0331 | slr0741 | slI1108 | ssr0390 | slI0728 | sml0007 | slI1933 | slr0575 |
| slr0342 | slr1622 | slr0331 | slr1510 | slI0362 | ssr0390 | slI0336 | sml0007 | slr0575 | slr0965 |
| slI1196 | slr0342 | slI1043 | slr0331 | slr0958 | ssr0390 | slI1299 | sml0007 | slr0575 | slr1463 |
| slI0745 | slr0342 | slr0331 | slr0400 | slr1720 | ssr0390 | sml0007 | ssl2084 | slI1098 | slr0575 |
| slI1815 | slr0342 | slI1415 | slr0331 | slI0179 | ssr0390 | slI2001 | sml0007 | slr0434 | slr0575 |
| slI1059 | slr0342 | slI1909 | slr0331 | slI0454 | ssr0390 | slI1430 | sml0007 | slI1261 | slr0575 |
| slr0342 | slr1123 | slI0373 | slr0331 | slI1553 | ssr0390 | slI0573 | sml0007 | slI1099 | slr0575 |
| slI1760 | slr0342 | slr0331 | slr2035 | slr0638 | ssr0390 | slr1898 | sml0007 | slr0575 | slr0752 |
| slI0469 | slr0342 | slr0331 | slr2132 | slr0220 | ssr0390 | slI0080 | sml0007 | slr0575 | slr0952 |
| slr0342 | slr1517 | slr0331 | slr0922 | slr0357 | ssr0390 | slr1022 | sml0007 | slr0575 | slr1511 |
| slI0869 | slr0342 | slr0331 | slr0838 | slI1362 | ssr0390 | slI1883 | sml0007 | slI1605 | slr0575 |
| slr0342 | slr1598 | slI1823 | slr0331 | slr1550 | ssr0390 | slr1133 | sml0007 | slI0990 | slr0575 |
| slI0868 | slr0342 | slI1056 | slr0331 | slI1074 | ssr0390 | slr0444 | sml0007 | slI1633 | slr0575 |
| slr0342 | slr0994 | slr0331 | slr0520 | slr0649 | ssr0390 | slr2130 | sml0007 | slr0018 | slr0575 |
| slI0379 | slr0342 | slI0144 | slr0331 | slI0495 | ssr0390 | slI1669 | sml0007 | slI0567 | slr0575 |
| slI1676 | slr0342 | slI0467 | slr0331 | slI1425 | ssr0390 | slr0585 | sml0007 | slr0575 | slr0884 |
| slI0927 | slr0342 | slr0331 | slr0711 | slI0502 | ssr0390 | slr2075 | sml0007 | slI1342 | slr0575 |
| slI0996 | slr0342 | slI0754 | slr0331 | slr1703 | ssr0390 | slr2076 | sml0007 | slr0575 | slr1349 |
| slI0844 | slr0342 | slI0569 | slr0331 | slI0078 | ssr0390 | slI0416 | sml0007 | slI0593 | slr0575 |
| slI1615 | slr0342 | slI1277 | slr0331 | slr0557 | ssr0390 | slr0156 | sml0007 | slI0220 | slr0575 |
| slI0202 | slr0342 | slI1110 | slr0331 | slr1884 | ssr0390 | slr1641 | sml0007 | slI0899 | slr0575 |
| slr0342 | slr0902 | slI1865 | slr0331 | slr1031 | ssr0390 | slr0542 | sml0007 | slr0575 | slr1756 |

|         |         |         |         |         |         |         |         |         |         |
|---------|---------|---------|---------|---------|---------|---------|---------|---------|---------|
| sl1144  | slr0342 | slr0331 | slr1228 | slr1793 | ssr0390 | sl10534 | sml0007 | sl11085 | slr0575 |
| slr0017 | slr0342 | slr0331 | slr0808 | slr0633 | ssr0390 | slr0165 | sml0007 | sl11931 | slr0575 |
| slr0342 | slr1424 | slr0082 | slr0331 | slr1278 | ssr0390 | sl10030 | sml0007 | sl10083 | slr0575 |
| slr0342 | slr1423 | slr0331 | slr0742 | slr0783 | ssr0390 | slr0847 | sml0007 | slr0575 | slr1755 |
| sl12010 | slr0342 | sl10098 | slr0331 | sl11198 | ssr0390 | slr0553 | sml0007 | sl10057 | slr0575 |
| slr0342 | slr0528 | slr0331 | slr1646 | sl10204 | ssr0390 | slr0812 | sml0007 | sl10017 | slr0575 |
| slr0342 | slr1351 | slr0331 | slr1130 | sl11750 | ssr0390 | slr1347 | sml0007 | sl11185 | slr0575 |
| sl10622 | slr0342 | slr0080 | slr0331 | sl10420 | ssr0390 | slr1348 | sml0007 | slr0575 | slr0839 |
| sl10631 | slr0342 | slr0331 | slr0551 | slr1256 | ssr0390 | slr1791 | sml0007 | sl11876 | slr0575 |
| slr0342 | slr0787 | sl10145 | slr0331 | sl11639 | ssr0390 | sl10594 | sml0007 | sl10900 | slr0575 |
| sl11852 | slr0342 | sl10708 | slr0331 | slr1899 | ssr0390 | slr0550 | sml0007 | slr0575 | slr0608 |
| slr0342 | slr1090 | slr0331 | slr0679 | sl10643 | ssr0390 | sl11058 | sml0007 | slr0575 | slr0652 |
| sl10902 | slr0342 | slr0331 | slr0722 | slr1844 | ssr0390 | slr1665 | sml0007 | slr0084 | slr0575 |
| slr0342 | slr0661 | slr0072 | slr0331 | sl10459 | ssr0390 | slr0536 | sml0007 | sl11893 | slr0575 |
| slr0342 | slr0526 | sl11547 | slr0331 | sl10865 | ssr0390 | slr1874 | sml0007 | slr0500 | slr0575 |
| sl11249 | slr0342 | sl11234 | slr0331 | slr0733 | ssr0390 | sl11776 | sml0007 | slr0575 | slr1560 |
| sl10892 | slr0342 | sl10616 | slr0331 | sl11459 | ssr0390 | sl10848 | sml0007 | sl11988 | slr0575 |
| sl10660 | slr0342 | slr0331 | slr2073 | sl10905 | ssr0390 | sl10897 | sml0007 | slr0575 | slr1289 |
| slr0342 | slr1779 | slr0331 | slr1639 | sl10402 | sl10629 | sl11933 | sml0007 | sl11556 | slr0575 |
| slr0342 | slr0394 | sl11108 | slr0331 | sl10629 | sl10728 | slr0965 | sml0007 | slr0575 | sl13441 |
| slr0342 | slr2047 | sl10362 | slr0331 | sl10336 | sl10629 | slr1463 | sml0007 | slr0575 | slr0744 |
| slr0342 | slr0741 | slr0331 | slr0958 | sl10629 | sl11299 | sl11098 | sml0007 | slr0575 | slr0974 |
| slr0342 | slr1510 | slr0331 | slr1720 | sl10629 | sl12084 | slr0434 | sml0007 | slr0575 | slr1622 |
| sl11043 | slr0342 | sl10179 | slr0331 | sl10629 | sl12001 | sl11261 | sml0007 | sl11196 | slr0575 |
| slr0342 | slr0400 | sl10454 | slr0331 | sl10629 | sl11430 | sl11099 | sml0007 | sl10745 | slr0575 |
| sl11415 | slr0342 | sl11553 | slr0331 | sl10573 | sl10629 | slr0752 | sml0007 | sl11815 | slr0575 |
| sl11909 | slr0342 | slr0331 | slr0638 | sl10629 | slr1898 | slr0952 | sml0007 | sl11059 | slr0575 |
| sl10373 | slr0342 | slr0220 | slr0331 | sl10080 | sl10629 | slr1511 | sml0007 | slr0575 | slr1123 |
| slr0342 | slr2035 | slr0331 | slr0357 | sl10629 | slr1022 | sl11605 | sml0007 | sl11760 | slr0575 |
| slr0342 | slr2132 | sl11362 | slr0331 | sl10629 | sl11883 | sl10990 | sml0007 | sl10469 | slr0575 |
| slr0342 | slr0922 | slr0331 | slr1550 | sl10629 | slr1133 | sl11633 | sml0007 | slr0575 | slr1517 |
| slr0342 | slr0838 | sl11074 | slr0331 | sl10629 | slr0444 | slr0018 | sml0007 | sl10869 | slr0575 |
| sl11823 | slr0342 | slr0331 | slr0649 | sl10629 | slr2130 | sl10567 | sml0007 | slr0575 | slr1598 |
| sl11056 | slr0342 | sl10495 | slr0331 | sl10629 | sl11669 | slr0884 | sml0007 | sl10868 | slr0575 |
| slr0342 | slr0520 | sl11425 | slr0331 | sl10629 | slr0585 | sl11342 | sml0007 | slr0575 | slr0994 |
| sl10144 | slr0342 | sl10502 | slr0331 | sl10629 | slr2075 | slr1349 | sml0007 | sl10379 | slr0575 |
| sl10467 | slr0342 | slr0331 | slr1703 | sl10629 | slr2076 | sl10593 | sml0007 | sl11676 | slr0575 |
| slr0342 | slr0711 | sl10078 | slr0331 | sl10416 | sl10629 | sl10220 | sml0007 | sl10927 | slr0575 |
| sl10754 | slr0342 | slr0331 | slr0557 | sl10629 | slr0156 | sl10899 | sml0007 | sl10996 | slr0575 |
| sl10569 | slr0342 | slr0331 | slr1884 | sl10629 | slr1641 | slr1756 | sml0007 | sl10844 | slr0575 |
| sl11277 | slr0342 | slr0331 | slr1031 | sl10629 | slr0542 | sl11085 | sml0007 | sl11615 | slr0575 |
| sl11110 | slr0342 | slr0331 | slr1793 | sl10534 | sl10629 | sl11931 | sml0007 | sl10202 | slr0575 |
| sl11865 | slr0342 | slr0331 | slr0633 | sl10629 | slr0165 | sl10083 | sml0007 | slr0575 | slr0902 |
| slr0342 | slr1228 | slr0331 | slr1278 | sl10030 | sl10629 | slr1755 | sml0007 | sl11144 | slr0575 |
| slr0342 | slr0808 | slr0331 | slr0783 | sl10629 | slr0847 | sl10057 | sml0007 | slr0017 | slr0575 |
| slr0082 | slr0342 | sl11198 | slr0331 | sl10629 | slr0553 | sl10017 | sml0007 | slr0575 | slr1424 |
| slr0342 | slr0742 | sl10204 | slr0331 | sl10629 | slr0812 | sl11185 | sml0007 | slr0575 | slr1423 |
| sl10098 | slr0342 | sl11750 | slr0331 | sl10629 | slr1347 | slr0839 | sml0007 | sl12010 | slr0575 |
| slr0342 | slr1646 | sl10420 | slr0331 | sl10629 | slr1348 | sl11876 | sml0007 | slr0528 | slr0575 |
| slr0342 | slr1130 | slr0331 | slr1256 | sl10629 | slr1791 | sl10900 | sml0007 | slr0575 | slr1351 |
| slr0080 | slr0342 | sl11639 | slr0331 | sl10594 | sl10629 | slr0608 | sml0007 | sl10622 | slr0575 |

|          |         |          |         |          |          |          |         |          |         |
|----------|---------|----------|---------|----------|----------|----------|---------|----------|---------|
| slr0342  | slr0551 | slr0331  | slr1899 | slil0629 | slr0550  | slr0652  | sml0007 | slil0631 | slr0575 |
| slil0145 | slr0342 | slil0643 | slr0331 | slil0629 | slil1058 | slr0084  | sml0007 | slr0575  | slr0787 |
| slil0708 | slr0342 | slr0331  | slr1844 | slil0629 | slr1665  | slil1893 | sml0007 | slil1852 | slr0575 |
| slr0342  | slr0679 | slil0459 | slr0331 | slil0629 | slr0536  | slr0500  | sml0007 | slr0575  | slr1090 |
| slr0342  | slr0722 | slil0865 | slr0331 | slil0629 | slr1874  | slr1560  | sml0007 | slil0902 | slr0575 |
| slr0072  | slr0342 | slr0331  | slr0733 | slil0629 | slil1776 | slil1988 | sml0007 | slr0575  | slr0661 |
| slil1547 | slr0342 | slil1459 | slr0331 | slil0629 | slil0848 | slr1289  | sml0007 | slr0526  | slr0575 |
| slil1234 | slr0342 | slil0905 | slr0331 | slil0629 | slil0897 | slil1556 | sml0007 | slil1249 | slr0575 |
| slil0616 | slr0342 | slil0402 | slr1291 | slil0629 | slil1933 | sml0007  | ssl3441 | slil0892 | slr0575 |
| slr0342  | slr2073 | slil0728 | slr1291 | slil0629 | slr0965  | slr0744  | sml0007 | slil0660 | slr0575 |
| slr0342  | slr1639 | slil0336 | slr1291 | slil0629 | slr1463  | slr0974  | sml0007 | slr0575  | slr1779 |
| slil1108 | slr0342 | slil1299 | slr1291 | slil0629 | slil1098 | slr1622  | sml0007 | slr0394  | slr0575 |
| slil0362 | slr0342 | slr1291  | ssl2084 | slil0629 | slr0434  | slil1196 | sml0007 | slr0575  | slr2047 |
| slr0342  | slr0958 | slil2001 | slr1291 | slil0629 | slil1261 | slil0745 | sml0007 | slr0575  | slr0741 |
| slr0342  | slr1720 | slil1430 | slr1291 | slil0629 | slil1099 | slil1815 | sml0007 | slr0575  | slr1510 |
| slil0179 | slr0342 | slil0573 | slr1291 | slil0629 | slr0752  | slil1059 | sml0007 | slil1043 | slr0575 |
| slil0454 | slr0342 | slr1291  | slr1898 | slil0629 | slr0952  | slr1123  | sml0007 | slr0400  | slr0575 |
| slil1553 | slr0342 | slil0080 | slr1291 | slil0629 | slr1511  | slil1760 | sml0007 | slil1415 | slr0575 |
| slr0342  | slr0638 | slr1022  | slr1291 | slil0629 | slil1605 | slil0469 | sml0007 | slil1909 | slr0575 |
| slr0220  | slr0342 | slil1883 | slr1291 | slil0629 | slil0990 | slr1517  | sml0007 | slil0373 | slr0575 |
| slr0342  | slr0357 | slr1133  | slr1291 | slil0629 | slil1633 | slil0869 | sml0007 | slr0575  | slr2035 |
| slil1362 | slr0342 | slr0444  | slr1291 | slil0629 | slr0018  | slr1598  | sml0007 | slr0575  | slr2132 |
| slr0342  | slr1550 | slr1291  | slr2130 | slil0567 | slil0629 | slil0868 | sml0007 | slr0575  | slr0922 |
| slil1074 | slr0342 | slil1669 | slr1291 | slil0629 | slr0884  | slr0994  | sml0007 | slr0575  | slr0838 |
| slr0342  | slr0649 | slr0585  | slr1291 | slil0629 | slil1342 | slil0379 | sml0007 | slil1823 | slr0575 |
| slil0495 | slr0342 | slr1291  | slr2075 | slil0629 | slr1349  | slil1676 | sml0007 | slil1056 | slr0575 |
| slil1425 | slr0342 | slr1291  | slr2076 | slil0593 | slil0629 | slil0927 | sml0007 | slr0520  | slr0575 |
| slil0502 | slr0342 | slil0416 | slr1291 | slil0220 | slil0629 | slil0996 | sml0007 | slil0144 | slr0575 |
| slr0342  | slr1703 | slr0156  | slr1291 | slil0629 | slil0899 | slil0844 | sml0007 | slil0467 | slr0575 |
| slil0078 | slr0342 | slr1291  | slr1641 | slil0629 | slr1756  | slil1615 | sml0007 | slr0575  | slr0711 |
| slr0342  | slr0557 | slr0542  | slr1291 | slil0629 | slil1085 | slil0202 | sml0007 | slil0754 | slr0575 |
| slr0342  | slr1884 | slil0534 | slr1291 | slil0629 | slil1931 | slr0902  | sml0007 | slil0569 | slr0575 |
| slr0342  | slr1031 | slr0165  | slr1291 | slil0083 | slil0629 | slil1144 | sml0007 | slil1277 | slr0575 |
| slr0342  | slr1793 | slil0030 | slr1291 | slil0629 | slr1755  | slr0017  | sml0007 | slil1110 | slr0575 |
| slr0342  | slr0633 | slr0847  | slr1291 | slil0057 | slil0629 | slr1424  | sml0007 | slil1865 | slr0575 |
| slr0342  | slr1278 | slr0553  | slr1291 | slil0017 | slil0629 | slr1423  | sml0007 | slr0575  | slr1228 |
| slr0342  | slr0783 | slr0812  | slr1291 | slil0629 | slil1185 | slil2010 | sml0007 | slr0575  | slr0808 |
| slil1198 | slr0342 | slr1291  | slr1347 | slil0629 | slr0839  | slr0528  | sml0007 | slr0082  | slr0575 |
| slil0204 | slr0342 | slr1291  | slr1348 | slil0629 | slil1876 | slr1351  | sml0007 | slr0575  | slr0742 |
| slil1750 | slr0342 | slr1291  | slr1791 | slil0629 | slil0900 | slil0622 | sml0007 | slil0098 | slr0575 |
| slil0420 | slr0342 | slil0594 | slr1291 | slil0629 | slr0608  | slil0631 | sml0007 | slr0575  | slr1646 |
| slr0342  | slr1256 | slr0550  | slr1291 | slil0629 | slr0652  | slr0787  | sml0007 | slr0575  | slr1130 |
| slil1639 | slr0342 | slil1058 | slr1291 | slil0629 | slr0084  | slil1852 | sml0007 | slr0080  | slr0575 |
| slr0342  | slr1899 | slr1291  | slr1665 | slil0629 | slil1893 | slr1090  | sml0007 | slr0551  | slr0575 |
| slil0643 | slr0342 | slr0536  | slr1291 | slil0629 | slr0500  | slil0902 | sml0007 | slil0145 | slr0575 |
| slr0342  | slr1844 | slr1291  | slr1874 | slil0629 | slr1560  | slr0661  | sml0007 | slil0708 | slr0575 |
| slil0459 | slr0342 | slil1776 | slr1291 | slil0629 | slil1988 | slr0526  | sml0007 | slr0575  | slr0679 |
| slil0865 | slr0342 | slil0848 | slr1291 | slil0629 | slr1289  | slil1249 | sml0007 | slr0575  | slr0722 |
| slr0342  | slr0733 | slil0897 | slr1291 | slil0629 | slil1556 | slil0892 | sml0007 | slr0072  | slr0575 |
| slil1459 | slr0342 | slil1933 | slr1291 | slil0629 | ssl3441  | slil0660 | sml0007 | slil1547 | slr0575 |
| slil0905 | slr0342 | slr0965  | slr1291 | slil0629 | slr0744  | slr1779  | sml0007 | slil1234 | slr0575 |

|         |         |         |         |         |         |         |         |         |         |
|---------|---------|---------|---------|---------|---------|---------|---------|---------|---------|
| sll0402 | sll1317 | slr1291 | slr1463 | sll0629 | slr0974 | slr0394 | sml0007 | sll0616 | slr0575 |
| sll0728 | sll1317 | sll1098 | slr1291 | sll0629 | slr1622 | slr2047 | sml0007 | slr0575 | slr2073 |
| sll0336 | sll1317 | slr0434 | slr1291 | sll0629 | sll1196 | slr0741 | sml0007 | slr0575 | slr1639 |
| sll1299 | sll1317 | sll1261 | slr1291 | sll0629 | sll0745 | slr1510 | sml0007 | sll1108 | slr0575 |
| sll1317 | ssl2084 | sll1099 | slr1291 | sll0629 | sll1815 | sll1043 | sml0007 | sll0362 | slr0575 |
| sll1317 | sll2001 | slr0752 | slr1291 | sll0629 | sll1059 | slr0400 | sml0007 | slr0575 | slr0958 |
| sll1317 | sll1430 | slr0952 | slr1291 | sll0629 | slr1123 | sll1415 | sml0007 | slr0575 | slr1720 |
| sll0573 | sll1317 | slr1291 | slr1511 | sll0629 | sll1760 | sll1909 | sml0007 | sll0179 | slr0575 |
| sll1317 | slr1898 | sll1605 | slr1291 | sll0469 | sll0629 | sll0373 | sml0007 | sll0454 | slr0575 |
| sll0080 | sll1317 | sll0990 | slr1291 | sll0629 | slr1517 | slr2035 | sml0007 | sll1553 | slr0575 |
| sll1317 | slr1022 | sll1633 | slr1291 | sll0629 | sll0869 | slr2132 | sml0007 | slr0575 | slr0638 |
| sll1317 | sll1883 | slr0018 | slr1291 | sll0629 | slr1598 | slr0922 | sml0007 | slr0220 | slr0575 |
| sll1317 | slr1133 | sll0567 | slr1291 | sll0629 | sll0868 | slr0838 | sml0007 | slr0357 | slr0575 |
| sll1317 | slr0444 | slr0884 | slr1291 | sll0629 | slr0994 | sll1823 | sml0007 | sll1362 | slr0575 |
| sll1317 | slr2130 | sll1342 | slr1291 | sll0379 | sll0629 | sll1056 | sml0007 | slr0575 | slr1550 |
| sll1317 | sll1669 | slr1291 | slr1349 | sll0629 | sll1676 | slr0520 | sml0007 | sll1074 | slr0575 |
| sll1317 | slr0585 | sll0593 | slr1291 | sll0629 | sll0927 | sll0144 | sml0007 | slr0575 | slr0649 |
| sll1317 | slr2075 | sll0220 | slr1291 | sll0629 | sll0996 | sll0467 | sml0007 | sll0495 | slr0575 |
| sll1317 | slr2076 | sll0899 | slr1291 | sll0629 | sll0844 | slr0711 | sml0007 | sll1425 | slr0575 |
| sll0416 | sll1317 | slr1291 | slr1756 | sll0629 | sll1615 | sll0754 | sml0007 | sll0502 | slr0575 |
| sll1317 | slr0156 | sll1085 | slr1291 | sll0202 | sll0629 | sll0569 | sml0007 | slr0575 | slr1703 |
| sll1317 | slr1641 | sll1931 | slr1291 | sll0629 | slr0902 | sll1277 | sml0007 | sll0078 | slr0575 |
| sll1317 | slr0542 | sll0083 | slr1291 | sll0629 | sll1144 | sll1110 | sml0007 | slr0557 | slr0575 |
| sll0534 | sll1317 | slr1291 | slr1755 | sll0629 | slr0017 | sll1865 | sml0007 | slr0575 | slr1884 |
| sll1317 | slr0165 | sll0057 | slr1291 | sll0629 | slr1424 | slr1228 | sml0007 | slr0575 | slr1031 |
| sll0030 | sll1317 | sll0017 | slr1291 | sll0629 | slr1423 | slr0808 | sml0007 | slr0575 | slr1793 |
| sll1317 | slr0847 | sll1185 | slr1291 | sll0629 | sll2010 | slr0082 | sml0007 | slr0575 | slr0633 |
| sll1317 | slr0553 | slr0839 | slr1291 | sll0629 | slr0528 | slr0742 | sml0007 | slr0575 | slr1278 |
| sll1317 | slr0812 | sll1876 | slr1291 | sll0629 | slr1351 | sll0098 | sml0007 | slr0575 | slr0783 |
| sll1317 | slr1347 | sll0900 | slr1291 | sll0622 | sll0629 | slr1646 | sml0007 | sll1198 | slr0575 |
| sll1317 | slr1348 | slr0608 | slr1291 | sll0629 | sll0631 | slr1130 | sml0007 | sll0204 | slr0575 |
| sll1317 | slr1791 | slr0652 | slr1291 | sll0629 | slr0787 | slr0080 | sml0007 | sll1750 | slr0575 |
| sll0594 | sll1317 | slr0084 | slr1291 | sll0629 | sll1852 | slr0551 | sml0007 | sll0420 | slr0575 |
| sll1317 | slr0550 | sll1893 | slr1291 | sll0629 | slr1090 | sll0145 | sml0007 | slr0575 | slr1256 |
| sll1058 | sll1317 | slr0500 | slr1291 | sll0629 | sll0902 | sll0708 | sml0007 | sll1639 | slr0575 |
| sll1317 | slr1665 | slr1291 | slr1560 | sll0629 | slr0661 | slr0679 | sml0007 | slr0575 | slr1899 |
| sll1317 | slr0536 | sll1988 | slr1291 | sll0629 | slr0526 | slr0722 | sml0007 | sll0643 | slr0575 |
| sll1317 | slr1874 | slr1289 | slr1291 | sll0629 | sll1249 | slr0072 | sml0007 | slr0575 | slr1844 |
| sll1317 | sll1776 | sll1556 | slr1291 | sll0629 | sll0892 | sll1547 | sml0007 | sll0459 | slr0575 |
| sll0848 | sll1317 | slr1291 | ssl3441 | sll0629 | sll0660 | sll1234 | sml0007 | sll0865 | slr0575 |
| sll0897 | sll1317 | slr0744 | slr1291 | sll0629 | slr1779 | sll0616 | sml0007 | slr0575 | slr0733 |
| sll1317 | sll1933 | slr0974 | slr1291 | sll0629 | slr0394 | slr2073 | sml0007 | sll1459 | slr0575 |
| sll1317 | slr0965 | slr1291 | slr1622 | sll0629 | slr2047 | slr1639 | sml0007 | sll0905 | slr0575 |
| sll1317 | slr1463 | sll1196 | slr1291 | sll0629 | slr0741 | sll1108 | sml0007 | sll0402 | slr0729 |
| sll1098 | sll1317 | sll0745 | slr1291 | sll0629 | slr1510 | sll0362 | sml0007 | sll0728 | slr0729 |
| sll1317 | slr0434 | sll1815 | slr1291 | sll0629 | sll1043 | slr0958 | sml0007 | sll0336 | slr0729 |
| sll1261 | sll1317 | sll1059 | slr1291 | sll0629 | slr0400 | slr1720 | sml0007 | sll1299 | slr0729 |
| sll1099 | sll1317 | slr1123 | slr1291 | sll0629 | sll1415 | sll0179 | sml0007 | slr0729 | ssl2084 |
| sll1317 | slr0752 | sll1760 | slr1291 | sll0629 | sll1909 | sll0454 | sml0007 | sll2001 | slr0729 |
| sll1317 | slr0952 | sll0469 | slr1291 | sll0373 | sll0629 | sll1553 | sml0007 | sll1430 | slr0729 |
| sll1317 | slr1511 | slr1291 | slr1517 | sll0629 | slr2035 | slr0638 | sml0007 | sll0573 | slr0729 |

|         |         |         |         |         |         |         |         |         |         |
|---------|---------|---------|---------|---------|---------|---------|---------|---------|---------|
| sll1317 | sll1605 | sll0869 | slr1291 | sll0629 | slr2132 | slr0220 | sml0007 | slr0729 | slr1898 |
| sll0990 | sll1317 | slr1291 | slr1598 | sll0629 | slr0922 | slr0357 | sml0007 | sll0080 | slr0729 |
| sll1317 | sll1633 | sll0868 | slr1291 | sll0629 | slr0838 | sll1362 | sml0007 | slr0729 | slr1022 |
| sll1317 | slr0018 | slr0994 | slr1291 | sll0629 | sll1823 | slr1550 | sml0007 | sll1883 | slr0729 |
| sll0567 | sll1317 | sll0379 | slr1291 | sll0629 | sll1056 | sll1074 | sml0007 | slr0729 | slr1133 |
| sll1317 | slr0884 | sll1676 | slr1291 | sll0629 | slr0520 | slr0649 | sml0007 | slr0444 | slr0729 |
| sll1317 | sll1342 | sll0927 | slr1291 | sll0144 | sll0629 | sll0495 | sml0007 | slr0729 | slr2130 |
| sll1317 | slr1349 | sll0996 | slr1291 | sll0467 | sll0629 | sll1425 | sml0007 | sll1669 | slr0729 |
| sll0593 | sll1317 | sll0844 | slr1291 | sll0629 | slr0711 | sll0502 | sml0007 | slr0585 | slr0729 |
| sll0220 | sll1317 | sll1615 | slr1291 | sll0629 | sll0754 | slr1703 | sml0007 | slr0729 | slr2075 |
| sll0899 | sll1317 | sll0202 | slr1291 | sll0569 | sll0629 | sll0078 | sml0007 | slr0729 | slr2076 |
| sll1317 | slr1756 | slr0902 | slr1291 | sll0629 | sll1277 | slr0557 | sml0007 | sll0416 | slr0729 |
| sll1085 | sll1317 | sll1144 | slr1291 | sll0629 | sll1110 | slr1884 | sml0007 | slr0156 | slr0729 |
| sll1317 | sll1931 | slr0017 | slr1291 | sll0629 | sll1865 | slr1031 | sml0007 | slr0729 | slr1641 |
| sll0083 | sll1317 | slr1291 | slr1424 | sll0629 | slr1228 | slr1793 | sml0007 | slr0542 | slr0729 |
| sll1317 | slr1755 | slr1291 | slr1423 | sll0629 | slr0808 | slr0633 | sml0007 | sll0534 | slr0729 |
| sll0057 | sll1317 | sll2010 | slr1291 | sll0629 | slr0082 | slr1278 | sml0007 | slr0165 | slr0729 |
| sll0017 | sll1317 | slr0528 | slr1291 | sll0629 | slr0742 | slr0783 | sml0007 | sll0030 | slr0729 |
| sll1185 | sll1317 | slr1291 | slr1351 | sll0098 | sll0629 | sll1198 | sml0007 | slr0729 | slr0847 |
| sll1317 | slr0839 | sll0622 | slr1291 | sll0629 | slr1646 | sll0204 | sml0007 | slr0553 | slr0729 |
| sll1317 | sll1876 | sll0631 | slr1291 | sll0629 | slr1130 | sll1750 | sml0007 | slr0729 | slr0812 |
| sll0900 | sll1317 | slr0787 | slr1291 | sll0629 | slr0080 | sll0420 | sml0007 | slr0729 | slr1347 |
| sll1317 | slr0608 | sll1852 | slr1291 | sll0629 | slr0551 | slr1256 | sml0007 | slr0729 | slr1348 |
| sll1317 | slr0652 | slr1090 | slr1291 | sll0145 | sll0629 | sll1639 | sml0007 | slr0729 | slr1791 |
| sll1317 | slr0084 | sll0902 | slr1291 | sll0629 | sll0708 | slr1899 | sml0007 | sll0594 | slr0729 |
| sll1317 | sll1893 | slr0661 | slr1291 | sll0629 | slr0679 | sll0643 | sml0007 | slr0550 | slr0729 |
| sll1317 | slr0500 | slr0526 | slr1291 | sll0629 | slr0722 | slr1844 | sml0007 | sll1058 | slr0729 |
| sll1317 | slr1560 | sll1249 | slr1291 | sll0629 | slr0072 | sll0459 | sml0007 | slr0729 | slr1665 |
| sll1317 | sll1988 | sll0892 | slr1291 | sll0629 | sll1547 | sll0865 | sml0007 | slr0536 | slr0729 |
| sll1317 | slr1289 | sll0660 | slr1291 | sll0629 | sll1234 | slr0733 | sml0007 | slr0729 | slr1874 |
| sll1317 | sll1556 | slr1291 | slr1779 | sll0616 | sll0629 | sll1459 | sml0007 | sll1776 | slr0729 |
| sll1317 | ssl3441 | slr0394 | slr1291 | sll0629 | slr2073 | sll0905 | sml0007 | sll0848 | slr0729 |
| sll1317 | slr0744 | slr1291 | slr2047 | sll0629 | slr1639 | sll0402 | sll1281 | sll0897 | slr0729 |
| sll1317 | slr0974 | slr0741 | slr1291 | sll0629 | sll1108 | sll0728 | sll1281 | sll1933 | slr0729 |
| sll1317 | slr1622 | slr1291 | slr1510 | sll0362 | sll0629 | sll0336 | sll1281 | slr0729 | slr0965 |
| sll1196 | sll1317 | sll1043 | slr1291 | sll0629 | slr0958 | sll1281 | sll1299 | slr0729 | slr1463 |
| sll0745 | sll1317 | slr0400 | slr1291 | sll0629 | slr1720 | sll1281 | ssl2084 | sll1098 | slr0729 |
| sll1317 | sll1815 | sll1415 | slr1291 | sll0179 | sll0629 | sll1281 | sll2001 | slr0434 | slr0729 |
| sll1059 | sll1317 | sll1909 | slr1291 | sll0454 | sll0629 | sll1281 | sll1430 | sll1261 | slr0729 |
| sll1317 | slr1123 | sll0373 | slr1291 | sll0629 | sll1553 | sll0573 | sll1281 | sll1099 | slr0729 |
| sll1317 | sll1760 | slr1291 | slr2035 | sll0629 | slr0638 | sll1281 | slr1898 | slr0729 | slr0752 |
| sll0469 | sll1317 | slr1291 | slr2132 | sll0629 | slr0220 | sll0080 | sll1281 | slr0729 | slr0952 |
| sll1317 | slr1517 | slr0922 | slr1291 | sll0629 | slr0357 | sll1281 | slr1022 | slr0729 | slr1511 |
| sll0869 | sll1317 | slr0838 | slr1291 | sll0629 | sll1362 | sll1281 | sll1883 | sll1605 | slr0729 |
| sll1317 | slr1598 | sll1823 | slr1291 | sll0629 | slr1550 | sll1281 | slr1133 | sll0990 | slr0729 |
| sll0868 | sll1317 | sll1056 | slr1291 | sll0629 | sll1074 | sll1281 | slr0444 | sll1633 | slr0729 |
| sll1317 | slr0994 | slr0520 | slr1291 | sll0629 | slr0649 | sll1281 | slr2130 | slr0018 | slr0729 |
| sll0379 | sll1317 | sll0144 | slr1291 | sll0495 | sll0629 | sll1281 | sll1669 | sll0567 | slr0729 |
| sll1317 | sll1676 | sll0467 | slr1291 | sll0629 | sll1425 | sll1281 | slr0585 | slr0729 | slr0884 |
| sll0927 | sll1317 | slr0711 | slr1291 | sll0502 | sll0629 | sll1281 | slr2075 | sll1342 | slr0729 |
| sll0996 | sll1317 | sll0754 | slr1291 | sll0629 | slr1703 | sll1281 | slr2076 | slr0729 | slr1349 |



|         |         |         |         |         |         |         |         |         |         |
|---------|---------|---------|---------|---------|---------|---------|---------|---------|---------|
| sll0844 | sll1317 | sll0569 | slr1291 | sll0078 | sll0629 | sll0416 | sll1281 | sll0593 | slr0729 |
| sll1317 | sll1615 | sll1277 | slr1291 | sll0629 | slr0557 | sll1281 | slr0156 | sll0220 | slr0729 |
| sll0202 | sll1317 | sll1110 | slr1291 | sll0629 | slr1884 | sll1281 | slr1641 | sll0899 | slr0729 |
| sll1317 | slr0902 | sll1865 | slr1291 | sll0629 | slr1031 | sll1281 | slr0542 | slr0729 | slr1756 |
| sll1144 | sll1317 | slr1228 | slr1291 | sll0629 | slr1793 | sll0534 | sll1281 | sll1085 | slr0729 |
| sll1317 | slr0017 | slr0808 | slr1291 | sll0629 | slr0633 | sll1281 | slr0165 | sll1931 | slr0729 |
| sll1317 | slr1424 | slr0082 | slr1291 | sll0629 | slr1278 | sll0030 | sll1281 | sll0083 | slr0729 |
| sll1317 | slr1423 | slr0742 | slr1291 | sll0629 | slr0783 | sll1281 | slr0847 | slr0729 | slr1755 |
| sll1317 | sll2010 | sll0098 | slr1291 | sll0629 | sll1198 | sll1281 | slr0553 | sll0057 | slr0729 |
| sll1317 | slr0528 | slr1291 | slr1646 | sll0204 | sll0629 | sll1281 | slr0812 | sll0017 | slr0729 |
| sll1317 | slr1351 | slr1130 | slr1291 | sll0629 | sll1750 | sll1281 | slr1347 | sll1185 | slr0729 |
| sll0622 | sll1317 | slr0080 | slr1291 | sll0420 | sll0629 | sll1281 | slr1348 | slr0729 | slr0839 |
| sll0631 | sll1317 | slr0551 | slr1291 | sll0629 | slr1256 | sll1281 | slr1791 | sll1876 | slr0729 |
| sll1317 | slr0787 | sll0145 | slr1291 | sll0629 | sll1639 | sll0594 | sll1281 | sll0900 | slr0729 |
| sll1317 | sll1852 | sll0708 | slr1291 | sll0629 | slr1899 | sll1281 | slr0550 | slr0608 | slr0729 |
| sll1317 | slr1090 | slr0679 | slr1291 | sll0629 | sll0643 | sll1058 | sll1281 | slr0652 | slr0729 |
| sll0902 | sll1317 | slr0722 | slr1291 | sll0629 | slr1844 | sll1281 | slr1665 | slr0084 | slr0729 |
| sll1317 | slr0661 | slr0072 | slr1291 | sll0459 | sll0629 | sll1281 | slr0536 | sll1893 | slr0729 |
| sll1317 | slr0526 | sll1547 | slr1291 | sll0629 | sll0865 | sll1281 | slr1874 | slr0500 | slr0729 |
| sll1249 | sll1317 | sll1234 | slr1291 | sll0629 | slr0733 | sll1281 | sll1776 | slr0729 | slr1560 |
| sll0892 | sll1317 | sll0616 | slr1291 | sll0629 | sll1459 | sll0848 | sll1281 | sll1988 | slr0729 |
| sll0660 | sll1317 | slr1291 | slr2073 | sll0629 | sll0905 | sll0897 | sll1281 | slr0729 | slr1289 |
| sll1317 | slr1779 | slr1291 | slr1639 | sll0402 | slr1655 | sll1281 | sll1933 | sll1556 | slr0729 |
| sll1317 | slr0394 | sll1108 | slr1291 | sll0728 | slr1655 | sll1281 | slr0965 | slr0729 | ssl3441 |
| sll1317 | slr2047 | sll0362 | slr1291 | sll0336 | slr1655 | sll1281 | slr1463 | slr0729 | slr0744 |
| sll1317 | slr0741 | slr0958 | slr1291 | sll1299 | slr1655 | sll1098 | sll1281 | slr0729 | slr0974 |
| sll1317 | slr1510 | slr1291 | slr1720 | slr1655 | ssl2084 | sll1281 | slr0434 | slr0729 | slr1622 |
| sll1043 | sll1317 | sll0179 | slr1291 | sll2001 | slr1655 | sll1261 | sll1281 | sll1196 | slr0729 |
| sll1317 | slr0400 | sll0454 | slr1291 | sll1430 | slr1655 | sll1099 | sll1281 | sll0745 | slr0729 |
| sll1317 | sll1415 | sll1553 | slr1291 | sll0573 | slr1655 | sll1281 | slr0752 | sll1815 | slr0729 |
| sll1317 | sll1909 | slr0638 | slr1291 | slr1655 | slr1898 | sll1281 | slr0952 | sll1059 | slr0729 |
| sll0373 | sll1317 | slr0220 | slr1291 | sll0080 | slr1655 | sll1281 | slr1511 | slr0729 | slr1123 |
| sll1317 | slr2035 | slr0357 | slr1291 | slr1022 | slr1655 | sll1281 | sll1605 | sll1760 | slr0729 |
| sll1317 | slr2132 | sll1362 | slr1291 | sll1883 | slr1655 | sll0990 | sll1281 | sll0469 | slr0729 |
| sll1317 | slr0922 | slr1291 | slr1550 | slr1133 | slr1655 | sll1281 | sll1633 | slr0729 | slr1517 |
| sll1317 | slr0838 | sll1074 | slr1291 | slr0444 | slr1655 | sll1281 | slr0018 | sll0869 | slr0729 |
| sll1317 | sll1823 | slr0649 | slr1291 | slr1655 | slr2130 | sll0567 | sll1281 | slr0729 | slr1598 |
| sll1056 | sll1317 | sll0495 | slr1291 | sll1669 | slr1655 | sll1281 | slr0884 | sll0868 | slr0729 |
| sll1317 | slr0520 | sll1425 | slr1291 | slr0585 | slr1655 | sll1281 | sll1342 | slr0729 | slr0994 |
| sll0144 | sll1317 | sll0502 | slr1291 | slr1655 | slr2075 | sll1281 | slr1349 | sll0379 | slr0729 |
| sll0467 | sll1317 | slr1291 | slr1703 | slr1655 | slr2076 | sll0593 | sll1281 | sll1676 | slr0729 |
| sll1317 | slr0711 | sll0078 | slr1291 | sll0416 | slr1655 | sll0220 | sll1281 | sll0927 | slr0729 |
| sll0754 | sll1317 | slr0557 | slr1291 | slr0156 | slr1655 | sll0899 | sll1281 | sll0996 | slr0729 |
| sll0569 | sll1317 | slr1291 | slr1884 | slr1641 | slr1655 | sll1281 | slr1756 | sll0844 | slr0729 |
| sll1277 | sll1317 | slr1031 | slr1291 | slr0542 | slr1655 | sll1085 | sll1281 | sll1615 | slr0729 |
| sll1110 | sll1317 | slr1291 | slr1793 | sll0534 | slr1655 | sll1281 | sll1931 | sll0202 | slr0729 |
| sll1317 | sll1865 | slr0633 | slr1291 | slr0165 | slr1655 | sll0083 | sll1281 | slr0729 | slr0902 |
| sll1317 | slr1228 | slr1278 | slr1291 | sll0030 | slr1655 | sll1281 | slr1755 | sll1144 | slr0729 |
| sll1317 | slr0808 | slr0783 | slr1291 | slr0847 | slr1655 | sll0057 | sll1281 | slr0017 | slr0729 |
| sll1317 | slr0082 | sll1198 | slr1291 | slr0553 | slr1655 | sll0017 | sll1281 | slr0729 | slr1424 |
| sll1317 | slr0742 | sll0204 | slr1291 | slr0812 | slr1655 | sll1185 | sll1281 | slr0729 | slr1423 |

|         |         |         |         |         |         |         |         |         |         |
|---------|---------|---------|---------|---------|---------|---------|---------|---------|---------|
| sll0098 | sll1317 | sll1750 | slr1291 | slr1347 | slr1655 | sll1281 | slr0839 | sll2010 | slr0729 |
| sll1317 | slr1646 | sll0420 | slr1291 | slr1348 | slr1655 | sll1281 | sll1876 | slr0528 | slr0729 |
| sll1317 | slr1130 | slr1256 | slr1291 | slr1655 | slr1791 | sll0900 | sll1281 | slr0729 | slr1351 |
| sll1317 | slr0080 | sll1639 | slr1291 | sll0594 | slr1655 | sll1281 | slr0608 | sll0622 | slr0729 |
| sll1317 | slr0551 | slr1291 | slr1899 | slr0550 | slr1655 | sll1281 | slr0652 | sll0631 | slr0729 |
| sll0145 | sll1317 | sll0643 | slr1291 | sll1058 | slr1655 | sll1281 | slr0084 | slr0729 | slr0787 |
| sll0708 | sll1317 | slr1291 | slr1844 | slr1655 | slr1665 | sll1281 | sll1893 | sll1852 | slr0729 |
| sll1317 | slr0679 | sll0459 | slr1291 | slr0536 | slr1655 | sll1281 | slr0500 | slr0729 | slr1090 |
| sll1317 | slr0722 | sll0865 | slr1291 | slr1655 | slr1874 | sll1281 | slr1560 | sll0902 | slr0729 |
| sll1317 | slr0072 | slr0733 | slr1291 | sll1776 | slr1655 | sll1281 | sll1988 | slr0661 | slr0729 |
| sll1317 | sll1547 | sll1459 | slr1291 | sll0848 | slr1655 | sll1281 | slr1289 | slr0526 | slr0729 |
| sll1234 | sll1317 | sll0905 | slr1291 | sll0897 | slr1655 | sll1281 | sll1556 | sll1249 | slr0729 |
| sll0616 | sll1317 | sll0402 | sll0522 | sll1933 | slr1655 | sll1281 | ssl3441 | sll0892 | slr0729 |
| sll1317 | slr2073 | sll0522 | sll0728 | slr0965 | slr1655 | sll1281 | slr0744 | sll0660 | slr0729 |
| sll1317 | slr1639 | sll0336 | sll0522 | slr1463 | slr1655 | sll1281 | slr0974 | slr0729 | slr1779 |
| sll1108 | sll1317 | sll0522 | sll1299 | sll1098 | slr1655 | sll1281 | slr1622 | slr0394 | slr0729 |
| sll0362 | sll1317 | sll0522 | ssl2084 | slr0434 | slr1655 | sll1196 | sll1281 | slr0729 | slr2047 |
| sll1317 | slr0958 | sll0522 | sll2001 | sll1261 | slr1655 | sll0745 | sll1281 | slr0729 | slr0741 |
| sll1317 | slr1720 | sll0522 | sll1430 | sll1099 | slr1655 | sll1281 | sll1815 | slr0729 | slr1510 |
| sll0179 | sll1317 | sll0522 | sll0573 | slr0752 | slr1655 | sll1059 | sll1281 | sll1043 | slr0729 |
| sll0454 | sll1317 | sll0522 | slr1898 | slr0952 | slr1655 | sll1281 | slr1123 | slr0400 | slr0729 |
| sll1317 | sll1553 | sll0080 | sll0522 | slr1511 | slr1655 | sll1281 | sll1760 | sll1415 | slr0729 |
| sll1317 | slr0638 | sll0522 | slr1022 | sll1605 | slr1655 | sll0469 | sll1281 | sll1909 | slr0729 |
| sll1317 | slr0220 | sll0522 | sll1883 | sll0990 | slr1655 | sll1281 | slr1517 | sll0373 | slr0729 |
| sll1317 | slr0357 | sll0522 | slr1133 | sll1633 | slr1655 | sll0869 | sll1281 | slr0729 | slr2035 |
| sll1317 | sll1362 | sll0522 | slr0444 | slr0018 | slr1655 | sll1281 | slr1598 | slr0729 | slr2132 |
| sll1317 | slr1550 | sll0522 | slr2130 | sll0567 | slr1655 | sll0868 | sll1281 | slr0729 | slr0922 |
| sll1074 | sll1317 | sll0522 | sll1669 | slr0884 | slr1655 | sll1281 | slr0994 | slr0729 | slr0838 |
| sll1317 | slr0649 | sll0522 | slr0585 | sll1342 | slr1655 | sll0379 | sll1281 | sll1823 | slr0729 |
| sll0495 | sll1317 | sll0522 | slr2075 | slr1349 | slr1655 | sll1281 | sll1676 | sll1056 | slr0729 |
| sll1317 | sll1425 | sll0522 | slr2076 | sll0593 | slr1655 | sll0927 | sll1281 | slr0520 | slr0729 |
| sll0502 | sll1317 | sll0416 | sll0522 | sll0220 | slr1655 | sll0996 | sll1281 | sll0144 | slr0729 |
| sll1317 | slr1703 | sll0522 | slr0156 | sll0899 | slr1655 | sll0844 | sll1281 | sll0467 | slr0729 |
| sll0078 | sll1317 | sll0522 | slr1641 | slr1655 | slr1756 | sll1281 | sll1615 | slr0711 | slr0729 |
| sll1317 | slr0557 | sll0522 | slr0542 | sll1085 | slr1655 | sll0202 | sll1281 | sll0754 | slr0729 |
| sll1317 | slr1884 | sll0522 | sll0534 | sll1931 | slr1655 | sll1281 | slr0902 | sll0569 | slr0729 |
| sll1317 | slr1031 | sll0522 | slr0165 | sll0083 | slr1655 | sll1144 | sll1281 | sll1277 | slr0729 |
| sll1317 | slr1793 | sll0030 | sll0522 | slr1655 | slr1755 | sll1281 | slr0017 | sll1110 | slr0729 |
| sll1317 | slr0633 | sll0522 | slr0847 | sll0057 | slr1655 | sll1281 | slr1424 | sll1865 | slr0729 |
| sll1317 | slr1278 | sll0522 | slr0553 | sll0017 | slr1655 | sll1281 | slr1423 | slr0729 | slr1228 |
| sll1317 | slr0783 | sll0522 | slr0812 | sll1185 | slr1655 | sll1281 | sll2010 | slr0729 | slr0808 |
| sll1198 | sll1317 | sll0522 | slr1347 | slr0839 | slr1655 | sll1281 | slr0528 | slr0082 | slr0729 |
| sll0204 | sll1317 | sll0522 | slr1348 | sll1876 | slr1655 | sll1281 | slr1351 | slr0729 | slr0742 |
| sll1317 | sll1750 | sll0522 | slr1791 | sll0900 | slr1655 | sll0622 | sll1281 | sll0098 | slr0729 |
| sll0420 | sll1317 | sll0522 | sll0594 | slr0608 | slr1655 | sll0631 | sll1281 | slr0729 | slr1646 |
| sll1317 | slr1256 | sll0522 | slr0550 | slr0652 | slr1655 | sll1281 | slr0787 | slr0729 | slr1130 |
| sll1317 | sll1639 | sll0522 | sll1058 | slr0084 | slr1655 | sll1281 | sll1852 | slr0080 | slr0729 |
| sll1317 | slr1899 | sll0522 | slr1665 | sll1893 | slr1655 | sll1281 | slr1090 | slr0551 | slr0729 |
| sll0643 | sll1317 | sll0522 | slr0536 | slr0500 | slr1655 | sll0902 | sll1281 | sll0145 | slr0729 |
| sll1317 | slr1844 | sll0522 | slr1874 | slr1560 | slr1655 | sll1281 | slr0661 | sll0708 | slr0729 |
| sll0459 | sll1317 | sll0522 | sll1776 | sll1988 | slr1655 | sll1281 | slr0526 | slr0679 | slr0729 |

|         |         |         |         |         |         |         |         |         |         |
|---------|---------|---------|---------|---------|---------|---------|---------|---------|---------|
| slI0865 | slI1317 | slI0522 | slI0848 | slr1289 | slr1655 | slI1249 | slI1281 | slr0722 | slr0729 |
| slI1317 | slr0733 | slI0522 | slI0897 | slI1556 | slr1655 | slI0892 | slI1281 | slr0072 | slr0729 |
| slI1317 | slI1459 | slI0522 | slI1933 | slr1655 | ssl3441 | slI0660 | slI1281 | slI1547 | slr0729 |
| slI0905 | slI1317 | slI0522 | slr0965 | slr0744 | slr1655 | slI1281 | slr1779 | slI1234 | slr0729 |
| slI0402 | slr1643 | slI0522 | slr1463 | slr0974 | slr1655 | slI1281 | slr0394 | slI0616 | slr0729 |
| slI0728 | slr1643 | slI0522 | slI1098 | slr1622 | slr1655 | slI1281 | slr2047 | slr0729 | slr2073 |
| slI0336 | slr1643 | slI0522 | slr0434 | slI1196 | slr1655 | slI1281 | slr0741 | slr0729 | slr1639 |
| slI1299 | slr1643 | slI0522 | slI1261 | slI0745 | slr1655 | slI1281 | slr1510 | slI1108 | slr0729 |
| slr1643 | ssl2084 | slI0522 | slI1099 | slI1815 | slr1655 | slI1043 | slI1281 | slI0362 | slr0729 |
| slI2001 | slr1643 | slI0522 | slr0752 | slI1059 | slr1655 | slI1281 | slr0400 | slr0729 | slr0958 |
| slI1430 | slr1643 | slI0522 | slr0952 | slr1123 | slr1655 | slI1281 | slI1415 | slr0729 | slr1720 |
| slI0573 | slr1643 | slI0522 | slr1511 | slI1760 | slr1655 | slI1281 | slI1909 | slI0179 | slr0729 |
| slr1643 | slr1898 | slI0522 | slI1605 | slI0469 | slr1655 | slI0373 | slI1281 | slI0454 | slr0729 |
| slI0080 | slr1643 | slI0522 | slI0990 | slr1517 | slr1655 | slI1281 | slr2035 | slI1553 | slr0729 |
| slr1022 | slr1643 | slI0522 | slI1633 | slI0869 | slr1655 | slI1281 | slr2132 | slr0638 | slr0729 |
| slI1883 | slr1643 | slI0522 | slr0018 | slr1598 | slr1655 | slI1281 | slr0922 | slr0220 | slr0729 |
| slr1133 | slr1643 | slI0522 | slI0567 | slI0868 | slr1655 | slI1281 | slr0838 | slr0357 | slr0729 |
| slr0444 | slr1643 | slI0522 | slr0884 | slr0994 | slr1655 | slI1281 | slI1823 | slI1362 | slr0729 |
| slr1643 | slr2130 | slI0522 | slI1342 | slI0379 | slr1655 | slI1056 | slI1281 | slr0729 | slr1550 |
| slI1669 | slr1643 | slI0522 | slr1349 | slI1676 | slr1655 | slI1281 | slr0520 | slI1074 | slr0729 |
| slr0585 | slr1643 | slI0522 | slI0593 | slI0927 | slr1655 | slI0144 | slI1281 | slr0649 | slr0729 |
| slr1643 | slr2075 | slI0220 | slI0522 | slI0996 | slr1655 | slI0467 | slI1281 | slI0495 | slr0729 |
| slr1643 | slr2076 | slI0522 | slI0899 | slI0844 | slr1655 | slI1281 | slr0711 | slI1425 | slr0729 |
| slI0416 | slr1643 | slI0522 | slr1756 | slI1615 | slr1655 | slI0754 | slI1281 | slI0502 | slr0729 |
| slr0156 | slr1643 | slI0522 | slI1085 | slI0202 | slr1655 | slI0569 | slI1281 | slr0729 | slr1703 |
| slr1641 | slr1643 | slI0522 | slI1931 | slr0902 | slr1655 | slI1277 | slI1281 | slI0078 | slr0729 |
| slr0542 | slr1643 | slI0083 | slI0522 | slI1144 | slr1655 | slI1110 | slI1281 | slr0557 | slr0729 |
| slI0534 | slr1643 | slI0522 | slr1755 | slr0017 | slr1655 | slI1281 | slI1865 | slr0729 | slr1884 |
| slr0165 | slr1643 | slI0057 | slI0522 | slr1424 | slr1655 | slI1281 | slr1228 | slr0729 | slr1031 |
| slI0030 | slr1643 | slI0017 | slI0522 | slr1423 | slr1655 | slI1281 | slr0808 | slr0729 | slr1793 |
| slr0847 | slr1643 | slI0522 | slI1185 | slI2010 | slr1655 | slI1281 | slr0082 | slr0633 | slr0729 |
| slr0553 | slr1643 | slI0522 | slr0839 | slr0528 | slr1655 | slI1281 | slr0742 | slr0729 | slr1278 |
| slr0812 | slr1643 | slI0522 | slI1876 | slr1351 | slr1655 | slI0098 | slI1281 | slr0729 | slr0783 |
| slr1347 | slr1643 | slI0522 | slI0900 | slI0622 | slr1655 | slI1281 | slr1646 | slI1198 | slr0729 |
| slr1348 | slr1643 | slI0522 | slr0608 | slI0631 | slr1655 | slI1281 | slr1130 | slI0204 | slr0729 |
| slr1643 | slr1791 | slI0522 | slr0652 | slr0787 | slr1655 | slI1281 | slr0080 | slI1750 | slr0729 |
| slI0594 | slr1643 | slI0522 | slr0084 | slI1852 | slr1655 | slI1281 | slr0551 | slI0420 | slr0729 |
| slr0550 | slr1643 | slI0522 | slI1893 | slr1090 | slr1655 | slI0145 | slI1281 | slr0729 | slr1256 |
| slI1058 | slr1643 | slI0522 | slr0500 | slI0902 | slr1655 | slI0708 | slI1281 | slI1639 | slr0729 |
| slr1643 | slr1665 | slI0522 | slr1560 | slr0661 | slr1655 | slI1281 | slr0679 | slr0729 | slr1899 |
| slr0536 | slr1643 | slI0522 | slI1988 | slr0526 | slr1655 | slI1281 | slr0722 | slI0643 | slr0729 |
| slr1643 | slr1874 | slI0522 | slr1289 | slI1249 | slr1655 | slI1281 | slr0072 | slr0729 | slr1844 |
| slI1776 | slr1643 | slI0522 | slI1556 | slI0892 | slr1655 | slI1281 | slI1547 | slI0459 | slr0729 |
| slI0848 | slr1643 | slI0522 | ssl3441 | slI0660 | slr1655 | slI1234 | slI1281 | slI0865 | slr0729 |
| slI0897 | slr1643 | slI0522 | slr0744 | slr1655 | slr1779 | slI0616 | slI1281 | slr0729 | slr0733 |
| slI1933 | slr1643 | slI0522 | slr0974 | slr0394 | slr1655 | slI1281 | slr2073 | slI1459 | slr0729 |
| slr0965 | slr1643 | slI0522 | slr1622 | slr1655 | slr2047 | slI1281 | slr1639 | slI0905 | slr0729 |
| slr1463 | slr1643 | slI0522 | slI1196 | slr0741 | slr1655 | slI1108 | slI1281 | slI0402 | slI0982 |
| slI1098 | slr1643 | slI0522 | slI0745 | slr1510 | slr1655 | slI0362 | slI1281 | slI0728 | slI0982 |
| slr0434 | slr1643 | slI0522 | slI1815 | slI1043 | slr1655 | slI1281 | slr0958 | slI0336 | slI0982 |
| slI1261 | slr1643 | slI0522 | slI1059 | slr0400 | slr1655 | slI1281 | slr1720 | slI0982 | slI1299 |

|         |         |         |         |         |         |         |         |         |         |
|---------|---------|---------|---------|---------|---------|---------|---------|---------|---------|
| slI1099 | slr1643 | slI0522 | slr1123 | slI1415 | slr1655 | slI0179 | slI1281 | slI0982 | ssl2084 |
| slr0752 | slr1643 | slI0522 | slI1760 | slI1909 | slr1655 | slI0454 | slI1281 | slI0982 | slI2001 |
| slr0952 | slr1643 | slI0469 | slI0522 | slI0373 | slr1655 | slI1281 | slI1553 | slI0982 | slI1430 |
| slr1511 | slr1643 | slI0522 | slr1517 | slr1655 | slr2035 | slI1281 | slr0638 | slI0573 | slI0982 |
| slI1605 | slr1643 | slI0522 | slI0869 | slr1655 | slr2132 | slI1281 | slr0220 | slI0982 | slr1898 |
| slI0990 | slr1643 | slI0522 | slr1598 | slr0922 | slr1655 | slI1281 | slr0357 | slI0080 | slI0982 |
| slI1633 | slr1643 | slI0522 | slI0868 | slr0838 | slr1655 | slI1281 | slI1362 | slI0982 | slr1022 |
| slr0018 | slr1643 | slI0522 | slr0994 | slI1823 | slr1655 | slI1281 | slr1550 | slI0982 | slI1883 |
| slI0567 | slr1643 | slI0379 | slI0522 | slI1056 | slr1655 | slI1074 | slI1281 | slI0982 | slr1133 |
| slr0884 | slr1643 | slI0522 | slI1676 | slr0520 | slr1655 | slI1281 | slr0649 | slI0982 | slr0444 |
| slI1342 | slr1643 | slI0522 | slI0927 | slI0144 | slr1655 | slI0495 | slI1281 | slI0982 | slr2130 |
| slr1349 | slr1643 | slI0522 | slI0996 | slI0467 | slr1655 | slI1281 | slI1425 | slI0982 | slI1669 |
| slI0593 | slr1643 | slI0522 | slI0844 | slr0711 | slr1655 | slI0502 | slI1281 | slI0982 | slr0585 |
| slI0220 | slr1643 | slI0522 | slI1615 | slI0754 | slr1655 | slI1281 | slr1703 | slI0982 | slr2075 |
| slI0899 | slr1643 | slI0202 | slI0522 | slI0569 | slr1655 | slI0078 | slI1281 | slI0982 | slr2076 |
| slr1643 | slr1756 | slI0522 | slr0902 | slI1277 | slr1655 | slI1281 | slr0557 | slI0416 | slI0982 |
| slI1085 | slr1643 | slI0522 | slI1144 | slI1110 | slr1655 | slI1281 | slr1884 | slI0982 | slr0156 |
| slI1931 | slr1643 | slI0522 | slr0017 | slI1865 | slr1655 | slI1281 | slr1031 | slI0982 | slr1641 |
| slI0083 | slr1643 | slI0522 | slr1424 | slr1228 | slr1655 | slI1281 | slr1793 | slI0982 | slr0542 |
| slr1643 | slr1755 | slI0522 | slr1423 | slr0808 | slr1655 | slI1281 | slr0633 | slI0534 | slI0982 |
| slI0057 | slr1643 | slI0522 | slI2010 | slr0082 | slr1655 | slI1281 | slr1278 | slI0982 | slr0165 |
| slI0017 | slr1643 | slI0522 | slr0528 | slr0742 | slr1655 | slI1281 | slr0783 | slI0030 | slI0982 |
| slI1185 | slr1643 | slI0522 | slr1351 | slI0098 | slr1655 | slI1198 | slI1281 | slI0982 | slr0847 |
| slr0839 | slr1643 | slI0522 | slI0622 | slr1646 | slr1655 | slI0204 | slI1281 | slI0982 | slr0553 |
| slI1876 | slr1643 | slI0522 | slI0631 | slr1130 | slr1655 | slI1281 | slI1750 | slI0982 | slr0812 |
| slI0900 | slr1643 | slI0522 | slr0787 | slr0080 | slr1655 | slI0420 | slI1281 | slI0982 | slr1347 |
| slr0608 | slr1643 | slI0522 | slI1852 | slr0551 | slr1655 | slI1281 | slr1256 | slI0982 | slr1348 |
| slr0652 | slr1643 | slI0522 | slr1090 | slI0145 | slr1655 | slI1281 | slI1639 | slI0982 | slr1791 |
| slr0084 | slr1643 | slI0522 | slI0902 | slI0708 | slr1655 | slI1281 | slr1899 | slI0594 | slI0982 |
| slI1893 | slr1643 | slI0522 | slr0661 | slr0679 | slr1655 | slI0643 | slI1281 | slI0982 | slr0550 |
| slr0500 | slr1643 | slI0522 | slr0526 | slr0722 | slr1655 | slI1281 | slr1844 | slI0982 | slI1058 |
| slr1560 | slr1643 | slI0522 | slI1249 | slr0072 | slr1655 | slI0459 | slI1281 | slI0982 | slr1665 |
| slI1988 | slr1643 | slI0522 | slI0892 | slI1547 | slr1655 | slI0865 | slI1281 | slI0982 | slr0536 |
| slr1289 | slr1643 | slI0522 | slI0660 | slI1234 | slr1655 | slI1281 | slr0733 | slI0982 | slr1874 |
| slI1556 | slr1643 | slI0522 | slr1779 | slI0616 | slr1655 | slI1281 | slI1459 | slI0982 | slI1776 |
| slr1643 | ssl3441 | slI0522 | slr0394 | slr1655 | slr2073 | slI0905 | slI1281 | slI0848 | slI0982 |
| slr0744 | slr1643 | slI0522 | slr2047 | slr1639 | slr1655 | slI0402 | ssl3383 | slI0897 | slI0982 |
| slr0974 | slr1643 | slI0522 | slr0741 | slI1108 | slr1655 | slI0728 | ssl3383 | slI0982 | slI1933 |
| slr1622 | slr1643 | slI0522 | slr1510 | slI0362 | slr1655 | slI0336 | ssl3383 | slI0982 | slr0965 |
| slI1196 | slr1643 | slI0522 | slI1043 | slr0958 | slr1655 | slI1299 | ssl3383 | slI0982 | slr1463 |
| slI0745 | slr1643 | slI0522 | slr0400 | slr1655 | slr1720 | ssl2084 | ssl3383 | slI0982 | slI1098 |
| slI1815 | slr1643 | slI0522 | slI1415 | slI0179 | slr1655 | slI2001 | ssl3383 | slI0982 | slr0434 |
| slI1059 | slr1643 | slI0522 | slI1909 | slI0454 | slr1655 | slI1430 | ssl3383 | slI0982 | slI1261 |
| slr1123 | slr1643 | slI0373 | slI0522 | slI1553 | slr1655 | slI0573 | ssl3383 | slI0982 | slI1099 |
| slI1760 | slr1643 | slI0522 | slr2035 | slr0638 | slr1655 | slr1898 | ssl3383 | slI0982 | slr0752 |
| slI0469 | slr1643 | slI0522 | slr2132 | slr0220 | slr1655 | slI0080 | ssl3383 | slI0982 | slr0952 |
| slr1517 | slr1643 | slI0522 | slr0922 | slr0357 | slr1655 | slr1022 | ssl3383 | slI0982 | slr1511 |
| slI0869 | slr1643 | slI0522 | slr0838 | slI1362 | slr1655 | slI1883 | ssl3383 | slI0982 | slI1605 |
| slr1598 | slr1643 | slI0522 | slI1823 | slr1550 | slr1655 | slr1133 | ssl3383 | slI0982 | slI0990 |
| slI0868 | slr1643 | slI0522 | slI1056 | slI1074 | slr1655 | slr0444 | ssl3383 | slI0982 | slI1633 |
| slr0994 | slr1643 | slI0522 | slr0520 | slr0649 | slr1655 | slr2130 | ssl3383 | slI0982 | slr0018 |

|         |         |         |         |         |         |         |         |         |         |
|---------|---------|---------|---------|---------|---------|---------|---------|---------|---------|
| slI0379 | slr1643 | slI0144 | slI0522 | slI0495 | slr1655 | slI1669 | ssr3383 | slI0567 | slI0982 |
| slI1676 | slr1643 | slI0467 | slI0522 | slI1425 | slr1655 | slr0585 | ssr3383 | slI0982 | slr0884 |
| slI0927 | slr1643 | slI0522 | slr0711 | slI0502 | slr1655 | slr2075 | ssr3383 | slI0982 | slI1342 |
| slI0996 | slr1643 | slI0522 | slI0754 | slr1655 | slr1703 | slr2076 | ssr3383 | slI0982 | slr1349 |
| slI0844 | slr1643 | slI0522 | slI0569 | slI0078 | slr1655 | slI0416 | ssr3383 | slI0593 | slI0982 |
| slI1615 | slr1643 | slI0522 | slI1277 | slr0557 | slr1655 | slr0156 | ssr3383 | slI0220 | slI0982 |
| slI0202 | slr1643 | slI0522 | slI1110 | slr1655 | slr1884 | slr1641 | ssr3383 | slI0899 | slI0982 |
| slr0902 | slr1643 | slI0522 | slI1865 | slr1031 | slr1655 | slr0542 | ssr3383 | slI0982 | slr1756 |
| slI1144 | slr1643 | slI0522 | slr1228 | slr1655 | slr1793 | slI0534 | ssr3383 | slI0982 | slI1085 |
| slr0017 | slr1643 | slI0522 | slr0808 | slr0633 | slr1655 | slr0165 | ssr3383 | slI0982 | slI1931 |
| slr1424 | slr1643 | slI0522 | slr0082 | slr1278 | slr1655 | slI0030 | ssr3383 | slI0083 | slI0982 |
| slr1423 | slr1643 | slI0522 | slr0742 | slr0783 | slr1655 | slr0847 | ssr3383 | slI0982 | slr1755 |
| slI2010 | slr1643 | slI0098 | slI0522 | slI1198 | slr1655 | slr0553 | ssr3383 | slI0057 | slI0982 |
| slr0528 | slr1643 | slI0522 | slr1646 | slI0204 | slr1655 | slr0812 | ssr3383 | slI0017 | slI0982 |
| slr1351 | slr1643 | slI0522 | slr1130 | slI1750 | slr1655 | slr1347 | ssr3383 | slI0982 | slI1185 |
| slI0622 | slr1643 | slI0522 | slr0080 | slI0420 | slr1655 | slr1348 | ssr3383 | slI0982 | slr0839 |
| slI0631 | slr1643 | slI0522 | slr0551 | slr1256 | slr1655 | slr1791 | ssr3383 | slI0982 | slI1876 |
| slr0787 | slr1643 | slI0145 | slI0522 | slI1639 | slr1655 | slI0594 | ssr3383 | slI0900 | slI0982 |
| slI1852 | slr1643 | slI0522 | slI0708 | slr1655 | slr1899 | slr0550 | ssr3383 | slI0982 | slr0608 |
| slr1090 | slr1643 | slI0522 | slr0679 | slI0643 | slr1655 | slI1058 | ssr3383 | slI0982 | slr0652 |
| slI0902 | slr1643 | slI0522 | slr0722 | slr1655 | slr1844 | slr1665 | ssr3383 | slI0982 | slr0084 |
| slr0661 | slr1643 | slI0522 | slr0072 | slI0459 | slr1655 | slr0536 | ssr3383 | slI0982 | slI1893 |
| slr0526 | slr1643 | slI0522 | slI1547 | slI0865 | slr1655 | slr1874 | ssr3383 | slI0982 | slr0500 |
| slI1249 | slr1643 | slI0522 | slI1234 | slr0733 | slr1655 | slI1776 | ssr3383 | slI0982 | slr1560 |
| slI0892 | slr1643 | slI0522 | slI0616 | slI1459 | slr1655 | slI0848 | ssr3383 | slI0982 | slI1988 |
| slI0660 | slr1643 | slI0522 | slr2073 | slI0905 | slr1655 | slI0897 | ssr3383 | slI0982 | slr1289 |
| slr1643 | slr1779 | slI0522 | slr1639 | slI0402 | smr0005 | slI1933 | ssr3383 | slI0982 | slI1556 |
| slr0394 | slr1643 | slI0522 | slI1108 | slI0728 | smr0005 | slr0965 | ssr3383 | slI0982 | ssl3441 |
| slr1643 | slr2047 | slI0362 | slI0522 | slI0336 | smr0005 | slr1463 | ssr3383 | slI0982 | slr0744 |
| slr0741 | slr1643 | slI0522 | slr0958 | slI1299 | smr0005 | slI1098 | ssr3383 | slI0982 | slr0974 |
| slr1510 | slr1643 | slI0522 | slr1720 | smr0005 | ssl2084 | slr0434 | ssr3383 | slI0982 | slr1622 |
| slI1043 | slr1643 | slI0179 | slI0522 | slI2001 | smr0005 | slI1261 | ssr3383 | slI0982 | slI1196 |
| slr0400 | slr1643 | slI0454 | slI0522 | slI1430 | smr0005 | slI1099 | ssr3383 | slI0745 | slI0982 |
| slI1415 | slr1643 | slI0522 | slI1553 | slI0573 | smr0005 | slr0752 | ssr3383 | slI0982 | slI1815 |
| slI1909 | slr1643 | slI0522 | slr0638 | slr1898 | smr0005 | slr0952 | ssr3383 | slI0982 | slI1059 |
| slI0373 | slr1643 | slI0522 | slr0220 | slI0080 | smr0005 | slr1511 | ssr3383 | slI0982 | slr1123 |
| slr1643 | slr2035 | slI0522 | slr0357 | slr1022 | smr0005 | slI1605 | ssr3383 | slI0982 | slI1760 |
| slr1643 | slr2132 | slI0522 | slI1362 | slI1883 | smr0005 | slI0990 | ssr3383 | slI0469 | slI0982 |
| slr0922 | slr1643 | slI0522 | slr1550 | slr1133 | smr0005 | slI1633 | ssr3383 | slI0982 | slr1517 |
| slr0838 | slr1643 | slI0522 | slI1074 | slr0444 | smr0005 | slr0018 | ssr3383 | slI0869 | slI0982 |
| slI1823 | slr1643 | slI0522 | slr0649 | slr2130 | smr0005 | slI0567 | ssr3383 | slI0982 | slr1598 |
| slI1056 | slr1643 | slI0495 | slI0522 | slI1669 | smr0005 | slr0884 | ssr3383 | slI0868 | slI0982 |
| slr0520 | slr1643 | slI0522 | slI1425 | slr0585 | smr0005 | slI1342 | ssr3383 | slI0982 | slr0994 |
| slI0144 | slr1643 | slI0502 | slI0522 | slr2075 | smr0005 | slr1349 | ssr3383 | slI0379 | slI0982 |
| slI0467 | slr1643 | slI0522 | slr1703 | slr2076 | smr0005 | slI0593 | ssr3383 | slI0982 | slI1676 |
| slr0711 | slr1643 | slI0078 | slI0522 | slI0416 | smr0005 | slI0220 | ssr3383 | slI0927 | slI0982 |
| slI0754 | slr1643 | slI0522 | slr0557 | slr0156 | smr0005 | slI0899 | ssr3383 | slI0982 | slI0996 |
| slI0569 | slr1643 | slI0522 | slr1884 | slr1641 | smr0005 | slr1756 | ssr3383 | slI0844 | slI0982 |
| slI1277 | slr1643 | slI0522 | slr1031 | slr0542 | smr0005 | slI1085 | ssr3383 | slI0982 | slI1615 |
| slI1110 | slr1643 | slI0522 | slr1793 | slI0534 | smr0005 | slI1931 | ssr3383 | slI0202 | slI0982 |
| slI1865 | slr1643 | slI0522 | slr0633 | slr0165 | smr0005 | slI0083 | ssr3383 | slI0982 | slr0902 |

|         |         |         |         |         |         |         |         |         |         |
|---------|---------|---------|---------|---------|---------|---------|---------|---------|---------|
| slr1228 | slr1643 | sll0522 | slr1278 | sll0030 | smr0005 | slr1755 | ssr3383 | sll0982 | sll1144 |
| slr0808 | slr1643 | sll0522 | slr0783 | slr0847 | smr0005 | sll0057 | ssr3383 | sll0982 | slr0017 |
| slr0082 | slr1643 | sll0522 | sll1198 | slr0553 | smr0005 | sll0017 | ssr3383 | sll0982 | slr1424 |
| slr0742 | slr1643 | sll0204 | sll0522 | slr0812 | smr0005 | sll1185 | ssr3383 | sll0982 | slr1423 |
| sll0098 | slr1643 | sll0522 | sll1750 | slr1347 | smr0005 | slr0839 | ssr3383 | sll0982 | sll2010 |
| slr1643 | slr1646 | sll0420 | sll0522 | slr1348 | smr0005 | sll1876 | ssr3383 | sll0982 | slr0528 |
| slr1130 | slr1643 | sll0522 | slr1256 | slr1791 | smr0005 | sll0900 | ssr3383 | sll0982 | slr1351 |
| slr0080 | slr1643 | sll0522 | sll1639 | sll0594 | smr0005 | slr0608 | ssr3383 | sll0622 | sll0982 |
| slr0551 | slr1643 | sll0522 | slr1899 | slr0550 | smr0005 | slr0652 | ssr3383 | sll0631 | sll0982 |
| sll0145 | slr1643 | sll0522 | sll0643 | sll1058 | smr0005 | slr0084 | ssr3383 | sll0982 | slr0787 |
| sll0708 | slr1643 | sll0522 | slr1844 | slr1665 | smr0005 | sll1893 | ssr3383 | sll0982 | sll1852 |
| slr0679 | slr1643 | sll0459 | sll0522 | slr0536 | smr0005 | slr0500 | ssr3383 | sll0982 | slr1090 |
| slr0722 | slr1643 | sll0522 | sll0865 | slr1874 | smr0005 | slr1560 | ssr3383 | sll0902 | sll0982 |
| slr0072 | slr1643 | sll0522 | slr0733 | sll1776 | smr0005 | sll1988 | ssr3383 | sll0982 | slr0661 |
| sll1547 | slr1643 | sll0522 | sll1459 | sll0848 | smr0005 | slr1289 | ssr3383 | sll0982 | slr0526 |
| sll1234 | slr1643 | sll0522 | sll0905 | sll0897 | smr0005 | sll1556 | ssr3383 | sll0982 | sll1249 |
| sll0616 | slr1643 | sll0402 | slr1963 | sll1933 | smr0005 | ssl3441 | ssr3383 | sll0892 | sll0982 |
| slr1643 | slr2073 | sll0728 | slr1963 | slr0965 | smr0005 | slr0744 | ssr3383 | sll0660 | sll0982 |
| slr1639 | slr1643 | sll0336 | slr1963 | slr1463 | smr0005 | slr0974 | ssr3383 | sll0982 | slr1779 |
| sll1108 | slr1643 | sll1299 | slr1963 | sll1098 | smr0005 | slr1622 | ssr3383 | sll0982 | slr0394 |
| sll0362 | slr1643 | slr1963 | ssl2084 | slr0434 | smr0005 | sll1196 | ssr3383 | sll0982 | slr2047 |
| slr0958 | slr1643 | sll2001 | slr1963 | sll1261 | smr0005 | sll0745 | ssr3383 | sll0982 | slr0741 |
| slr1643 | slr1720 | sll1430 | slr1963 | sll1099 | smr0005 | sll1815 | ssr3383 | sll0982 | slr1510 |
| sll0179 | slr1643 | sll0573 | slr1963 | slr0752 | smr0005 | sll1059 | ssr3383 | sll0982 | sll1043 |
| sll0454 | slr1643 | slr1898 | slr1963 | slr0952 | smr0005 | slr1123 | ssr3383 | sll0982 | slr0400 |
| sll1553 | slr1643 | sll0080 | slr1963 | slr1511 | smr0005 | sll1760 | ssr3383 | sll0982 | sll1415 |
| slr0638 | slr1643 | slr1022 | slr1963 | sll1605 | smr0005 | sll0469 | ssr3383 | sll0982 | sll1909 |
| slr0220 | slr1643 | sll1883 | slr1963 | sll0990 | smr0005 | slr1517 | ssr3383 | sll0373 | sll0982 |
| slr0357 | slr1643 | slr1133 | slr1963 | sll1633 | smr0005 | sll0869 | ssr3383 | sll0982 | slr2035 |
| sll1362 | slr1643 | slr0444 | slr1963 | slr0018 | smr0005 | slr1598 | ssr3383 | sll0982 | slr2132 |
| slr1550 | slr1643 | slr1963 | slr2130 | sll0567 | smr0005 | sll0868 | ssr3383 | sll0982 | slr0922 |
| sll1074 | slr1643 | sll1669 | slr1963 | slr0884 | smr0005 | slr0994 | ssr3383 | sll0982 | slr0838 |
| slr0649 | slr1643 | slr0585 | slr1963 | sll1342 | smr0005 | sll0379 | ssr3383 | sll0982 | sll1823 |
| sll0495 | slr1643 | slr1963 | slr2075 | slr1349 | smr0005 | sll1676 | ssr3383 | sll0982 | sll1056 |
| sll1425 | slr1643 | slr1963 | slr2076 | sll0593 | smr0005 | sll0927 | ssr3383 | sll0982 | slr0520 |
| sll0502 | slr1643 | sll0416 | slr1963 | sll0220 | smr0005 | sll0996 | ssr3383 | sll0144 | sll0982 |
| slr1643 | slr1703 | slr0156 | slr1963 | sll0899 | smr0005 | sll0844 | ssr3383 | sll0467 | sll0982 |
| sll0078 | slr1643 | slr1641 | slr1963 | slr1756 | smr0005 | sll1615 | ssr3383 | sll0982 | slr0711 |
| slr0557 | slr1643 | slr0542 | slr1963 | sll1085 | smr0005 | sll0202 | ssr3383 | sll0754 | sll0982 |
| slr1643 | slr1884 | sll0534 | slr1963 | sll1931 | smr0005 | slr0902 | ssr3383 | sll0569 | sll0982 |
| slr1031 | slr1643 | slr0165 | slr1963 | sll0083 | smr0005 | sll1144 | ssr3383 | sll0982 | sll1277 |
| slr1643 | slr1793 | sll0030 | slr1963 | slr1755 | smr0005 | slr0017 | ssr3383 | sll0982 | sll1110 |
| slr0633 | slr1643 | slr0847 | slr1963 | sll0057 | smr0005 | slr1424 | ssr3383 | sll0982 | sll1865 |
| slr1278 | slr1643 | slr0553 | slr1963 | sll0017 | smr0005 | slr1423 | ssr3383 | sll0982 | slr1228 |
| slr0783 | slr1643 | slr0812 | slr1963 | sll1185 | smr0005 | sll2010 | ssr3383 | sll0982 | slr0808 |
| sll1198 | slr1643 | slr1347 | slr1963 | slr0839 | smr0005 | slr0528 | ssr3383 | sll0982 | slr0082 |
| sll0204 | slr1643 | slr1348 | slr1963 | sll1876 | smr0005 | slr1351 | ssr3383 | sll0982 | slr0742 |
| sll1750 | slr1643 | slr1791 | slr1963 | sll0900 | smr0005 | sll0622 | ssr3383 | sll0098 | sll0982 |
| sll0420 | slr1643 | sll0594 | slr1963 | slr0608 | smr0005 | sll0631 | ssr3383 | sll0982 | slr1646 |
| slr1256 | slr1643 | slr0550 | slr1963 | slr0652 | smr0005 | slr0787 | ssr3383 | sll0982 | slr1130 |
| sll1639 | slr1643 | sll1058 | slr1963 | slr0084 | smr0005 | sll1852 | ssr3383 | sll0982 | slr0080 |

|         |         |         |         |         |         |         |         |         |         |
|---------|---------|---------|---------|---------|---------|---------|---------|---------|---------|
| slr1643 | slr1899 | slr1665 | slr1963 | sll1893 | smr0005 | slr1090 | ssr3383 | sll0982 | slr0551 |
| sll0643 | slr1643 | slr0536 | slr1963 | slr0500 | smr0005 | sll0902 | ssr3383 | sll0145 | sll0982 |
| slr1643 | slr1844 | slr1874 | slr1963 | slr1560 | smr0005 | slr0661 | ssr3383 | sll0708 | sll0982 |
| sll0459 | slr1643 | sll1776 | slr1963 | sll1988 | smr0005 | slr0526 | ssr3383 | sll0982 | slr0679 |
| sll0865 | slr1643 | sll0848 | slr1963 | slr1289 | smr0005 | sll1249 | ssr3383 | sll0982 | slr0722 |
| slr0733 | slr1643 | sll0897 | slr1963 | sll1556 | smr0005 | sll0892 | ssr3383 | sll0982 | slr0072 |
| sll1459 | slr1643 | sll1933 | slr1963 | smr0005 | ssl3441 | sll0660 | ssr3383 | sll0982 | sll1547 |
| sll0905 | slr1643 | slr0965 | slr1963 | slr0744 | smr0005 | slr1779 | ssr3383 | sll0982 | sll1234 |
| sll0402 | slr1295 | slr1463 | slr1963 | slr0974 | smr0005 | slr0394 | ssr3383 | sll0616 | sll0982 |
| sll0728 | slr1295 | sll1098 | slr1963 | slr1622 | smr0005 | slr2047 | ssr3383 | sll0982 | slr2073 |
| sll0336 | slr1295 | slr0434 | slr1963 | sll1196 | smr0005 | slr0741 | ssr3383 | sll0982 | slr1639 |
| sll1299 | slr1295 | sll1261 | slr1963 | sll0745 | smr0005 | slr1510 | ssr3383 | sll0982 | sll1108 |
| slr1295 | ssl2084 | sll1099 | slr1963 | sll1815 | smr0005 | sll1043 | ssr3383 | sll0362 | sll0982 |
| sll2001 | slr1295 | slr0752 | slr1963 | sll1059 | smr0005 | slr0400 | ssr3383 | sll0982 | slr0958 |
| sll1430 | slr1295 | slr0952 | slr1963 | slr1123 | smr0005 | sll1415 | ssr3383 | sll0982 | slr1720 |
| sll0573 | slr1295 | slr1511 | slr1963 | sll1760 | smr0005 | sll1909 | ssr3383 | sll0179 | sll0982 |
| slr1295 | slr1898 | sll1605 | slr1963 | sll0469 | smr0005 | sll0373 | ssr3383 | sll0454 | sll0982 |
| sll0080 | slr1295 | sll0990 | slr1963 | slr1517 | smr0005 | slr2035 | ssr3383 | sll0982 | sll1553 |
| slr1022 | slr1295 | sll1633 | slr1963 | sll0869 | smr0005 | slr2132 | ssr3383 | sll0982 | slr0638 |
| sll1883 | slr1295 | slr0018 | slr1963 | slr1598 | smr0005 | slr0922 | ssr3383 | sll0982 | slr0220 |
| slr1133 | slr1295 | sll0567 | slr1963 | sll0868 | smr0005 | slr0838 | ssr3383 | sll0982 | slr0357 |
| slr0444 | slr1295 | slr0884 | slr1963 | slr0994 | smr0005 | sll1823 | ssr3383 | sll0982 | sll1362 |
| slr1295 | slr2130 | sll1342 | slr1963 | sll0379 | smr0005 | sll1056 | ssr3383 | sll0982 | slr1550 |
| sll1669 | slr1295 | slr1349 | slr1963 | sll1676 | smr0005 | slr0520 | ssr3383 | sll0982 | sll1074 |
| slr0585 | slr1295 | sll0593 | slr1963 | sll0927 | smr0005 | sll0144 | ssr3383 | sll0982 | slr0649 |
| slr1295 | slr2075 | sll0220 | slr1963 | sll0996 | smr0005 | sll0467 | ssr3383 | sll0495 | sll0982 |
| slr1295 | slr2076 | sll0899 | slr1963 | sll0844 | smr0005 | slr0711 | ssr3383 | sll0982 | sll1425 |
| sll0416 | slr1295 | slr1756 | slr1963 | sll1615 | smr0005 | sll0754 | ssr3383 | sll0982 | slr1703 |
| slr0156 | slr1295 | sll1085 | slr1963 | sll0202 | smr0005 | sll0569 | ssr3383 | sll0078 | sll0982 |
| slr1295 | slr1641 | sll1931 | slr1963 | slr0902 | smr0005 | sll1277 | ssr3383 | sll0982 | slr0557 |
| slr0542 | slr1295 | sll0083 | slr1963 | sll1144 | smr0005 | sll1110 | ssr3383 | sll0982 | slr1884 |
| sll0534 | slr1295 | slr1755 | slr1963 | slr0017 | smr0005 | sll1865 | ssr3383 | sll0982 | slr1031 |
| slr0165 | slr1295 | sll0057 | slr1963 | slr1424 | smr0005 | slr1228 | ssr3383 | sll0982 | slr1793 |
| sll0030 | slr1295 | sll0017 | slr1963 | slr1423 | smr0005 | slr0808 | ssr3383 | sll0982 | slr0633 |
| slr0847 | slr1295 | sll1185 | slr1963 | sll2010 | smr0005 | slr0082 | ssr3383 | sll0982 | slr1278 |
| slr0553 | slr1295 | slr0839 | slr1963 | slr0528 | smr0005 | slr0742 | ssr3383 | sll0982 | slr0783 |
| slr0812 | slr1295 | sll1876 | slr1963 | slr1351 | smr0005 | sll0098 | ssr3383 | sll0982 | sll1198 |
| slr1295 | slr1347 | sll0900 | slr1963 | sll0622 | smr0005 | slr1646 | ssr3383 | sll0204 | sll0982 |
| slr1295 | slr1348 | slr0608 | slr1963 | sll0631 | smr0005 | slr1130 | ssr3383 | sll0982 | sll1750 |
| slr1295 | slr1791 | slr0652 | slr1963 | slr0787 | smr0005 | slr0080 | ssr3383 | sll0420 | sll0982 |
| sll0594 | slr1295 | slr0084 | slr1963 | sll1852 | smr0005 | slr0551 | ssr3383 | sll0982 | slr1256 |
| slr0550 | slr1295 | sll1893 | slr1963 | slr1090 | smr0005 | sll0145 | ssr3383 | sll0982 | sll1639 |
| sll1058 | slr1295 | slr0500 | slr1963 | sll0902 | smr0005 | sll0708 | ssr3383 | sll0982 | slr1899 |
| slr1295 | slr1665 | slr1560 | slr1963 | slr0661 | smr0005 | slr0679 | ssr3383 | sll0643 | sll0982 |
| slr0536 | slr1295 | sll1988 | slr1963 | slr0526 | smr0005 | slr0722 | ssr3383 | sll0982 | slr1844 |
| slr1295 | slr1874 | slr1289 | slr1963 | sll1249 | smr0005 | slr0072 | ssr3383 | sll0459 | sll0982 |
| sll1776 | slr1295 | sll1556 | slr1963 | sll0892 | smr0005 | sll1547 | ssr3383 | sll0865 | sll0982 |
| sll0848 | slr1295 | slr1963 | ssl3441 | sll0660 | smr0005 | sll1234 | ssr3383 | sll0982 | slr0733 |
| sll0897 | slr1295 | slr0744 | slr1963 | slr1779 | smr0005 | sll0616 | ssr3383 | sll0982 | sll1459 |
| sll1933 | slr1295 | slr0974 | slr1963 | slr0394 | smr0005 | slr2073 | ssr3383 | sll0905 | sll0982 |
| slr0965 | slr1295 | slr1622 | slr1963 | slr2047 | smr0005 | slr1639 | ssr3383 | sll0047 | sll0402 |

|         |         |         |         |         |         |         |         |         |         |
|---------|---------|---------|---------|---------|---------|---------|---------|---------|---------|
| slr1295 | slr1463 | sll1196 | slr1963 | slr0741 | smr0005 | sll1108 | ssr3383 | sll0047 | sll0728 |
| sll1098 | slr1295 | sll0745 | slr1963 | slr1510 | smr0005 | sll0362 | ssr3383 | sll0047 | sll0336 |
| slr0434 | slr1295 | sll1815 | slr1963 | sll1043 | smr0005 | slr0958 | ssr3383 | sll0047 | sll1299 |
| sll1261 | slr1295 | sll1059 | slr1963 | slr0400 | smr0005 | slr1720 | ssr3383 | sll0047 | ssl2084 |
| sll1099 | slr1295 | slr1123 | slr1963 | sll1415 | smr0005 | sll0179 | ssr3383 | sll0047 | sll2001 |
| slr0752 | slr1295 | sll1760 | slr1963 | sll1909 | smr0005 | sll0454 | ssr3383 | sll0047 | sll1430 |
| slr0952 | slr1295 | sll0469 | slr1963 | sll0373 | smr0005 | sll1553 | ssr3383 | sll0047 | sll0573 |
| slr1295 | slr1511 | slr1517 | slr1963 | slr2035 | smr0005 | slr0638 | ssr3383 | sll0047 | slr1898 |
| sll1605 | slr1295 | sll0869 | slr1963 | slr2132 | smr0005 | slr0220 | ssr3383 | sll0047 | sll0080 |
| sll0990 | slr1295 | slr1598 | slr1963 | slr0922 | smr0005 | slr0357 | ssr3383 | sll0047 | slr1022 |
| sll1633 | slr1295 | sll0868 | slr1963 | slr0838 | smr0005 | sll1362 | ssr3383 | sll0047 | sll1883 |
| slr0018 | slr1295 | slr0994 | slr1963 | sll1823 | smr0005 | slr1550 | ssr3383 | sll0047 | slr1133 |
| sll0567 | slr1295 | sll0379 | slr1963 | sll1056 | smr0005 | sll1074 | ssr3383 | sll0047 | slr0444 |
| slr0884 | slr1295 | sll1676 | slr1963 | slr0520 | smr0005 | slr0649 | ssr3383 | sll0047 | slr2130 |
| sll1342 | slr1295 | sll0927 | slr1963 | sll0144 | smr0005 | sll0495 | ssr3383 | sll0047 | sll1669 |
| slr1295 | slr1349 | sll0996 | slr1963 | sll0467 | smr0005 | sll1425 | ssr3383 | sll0047 | slr0585 |
| sll0593 | slr1295 | sll0844 | slr1963 | slr0711 | smr0005 | sll0502 | ssr3383 | sll0047 | slr2075 |
| sll0220 | slr1295 | sll1615 | slr1963 | sll0754 | smr0005 | slr1703 | ssr3383 | sll0047 | slr2076 |
| sll0899 | slr1295 | sll0202 | slr1963 | sll0569 | smr0005 | sll0078 | ssr3383 | sll0047 | sll0416 |
| slr1295 | slr1756 | slr0902 | slr1963 | sll1277 | smr0005 | slr0557 | ssr3383 | sll0047 | slr0156 |
| sll1085 | slr1295 | sll1144 | slr1963 | sll1110 | smr0005 | slr1884 | ssr3383 | sll0047 | slr1641 |
| sll1931 | slr1295 | slr0017 | slr1963 | sll1865 | smr0005 | slr1031 | ssr3383 | sll0047 | slr0542 |
| sll0083 | slr1295 | slr1424 | slr1963 | slr1228 | smr0005 | slr1793 | ssr3383 | sll0047 | sll0534 |
| slr1295 | slr1755 | slr1423 | slr1963 | slr0808 | smr0005 | slr0633 | ssr3383 | sll0047 | slr0165 |
| sll0057 | slr1295 | sll2010 | slr1963 | slr0082 | smr0005 | slr1278 | ssr3383 | sll0030 | sll0047 |
| sll0017 | slr1295 | slr0528 | slr1963 | slr0742 | smr0005 | slr0783 | ssr3383 | sll0047 | slr0847 |
| sll1185 | slr1295 | slr1351 | slr1963 | sll0098 | smr0005 | sll1198 | ssr3383 | sll0047 | slr0553 |
| slr0839 | slr1295 | sll0622 | slr1963 | slr1646 | smr0005 | sll0204 | ssr3383 | sll0047 | slr0812 |
| sll1876 | slr1295 | sll0631 | slr1963 | slr1130 | smr0005 | sll1750 | ssr3383 | sll0047 | slr1347 |
| sll0900 | slr1295 | slr0787 | slr1963 | slr0080 | smr0005 | sll0420 | ssr3383 | sll0047 | slr1348 |
| slr0608 | slr1295 | sll1852 | slr1963 | slr0551 | smr0005 | slr1256 | ssr3383 | sll0047 | slr1791 |
| slr0652 | slr1295 | slr1090 | slr1963 | sll0145 | smr0005 | sll1639 | ssr3383 | sll0047 | sll0594 |
| slr0084 | slr1295 | sll0902 | slr1963 | sll0708 | smr0005 | slr1899 | ssr3383 | sll0047 | slr0550 |
| sll1893 | slr1295 | slr0661 | slr1963 | slr0679 | smr0005 | sll0643 | ssr3383 | sll0047 | sll1058 |
| slr0500 | slr1295 | slr0526 | slr1963 | slr0722 | smr0005 | slr1844 | ssr3383 | sll0047 | slr1665 |
| slr1295 | slr1560 | sll1249 | slr1963 | slr0072 | smr0005 | sll0459 | ssr3383 | sll0047 | slr0536 |
| sll1988 | slr1295 | sll0892 | slr1963 | sll1547 | smr0005 | sll0865 | ssr3383 | sll0047 | slr1874 |
| slr1289 | slr1295 | sll0660 | slr1963 | sll1234 | smr0005 | slr0733 | ssr3383 | sll0047 | sll1776 |
| sll1556 | slr1295 | slr1779 | slr1963 | sll0616 | smr0005 | sll1459 | ssr3383 | sll0047 | sll0848 |
| slr1295 | ssl3441 | slr0394 | slr1963 | slr2073 | smr0005 | sll0905 | ssr3383 | sll0047 | sll0897 |
| slr0744 | slr1295 | slr1963 | slr2047 | slr1639 | smr0005 | sll0402 | sll1580 | sll0047 | sll1933 |
| slr0974 | slr1295 | slr0741 | slr1963 | sll1108 | smr0005 | sll0728 | sll1580 | sll0047 | slr0965 |
| slr1295 | slr1622 | slr1510 | slr1963 | sll0362 | smr0005 | sll0336 | sll1580 | sll0047 | slr1463 |
| sll1196 | slr1295 | sll1043 | slr1963 | slr0958 | smr0005 | sll1299 | sll1580 | sll0047 | sll1098 |
| sll0745 | slr1295 | slr0400 | slr1963 | slr1720 | smr0005 | sll1580 | ssl2084 | sll0047 | slr0434 |
| sll1815 | slr1295 | sll1415 | slr1963 | sll0179 | smr0005 | sll1580 | sll2001 | sll0047 | sll1261 |
| sll1059 | slr1295 | sll1909 | slr1963 | sll0454 | smr0005 | sll1430 | sll1580 | sll0047 | sll1099 |
| slr1123 | slr1295 | sll0373 | slr1963 | sll1553 | smr0005 | sll0573 | sll1580 | sll0047 | slr0752 |
| sll1760 | slr1295 | slr1963 | slr2035 | slr0638 | smr0005 | sll1580 | slr1898 | sll0047 | slr0952 |
| sll0469 | slr1295 | slr1963 | slr2132 | slr0220 | smr0005 | sll0080 | sll1580 | sll0047 | slr1511 |
| slr1295 | slr1517 | slr0922 | slr1963 | slr0357 | smr0005 | sll1580 | slr1022 | sll0047 | sll1605 |



|         |         |         |         |         |         |         |         |         |         |
|---------|---------|---------|---------|---------|---------|---------|---------|---------|---------|
| slI0869 | slr1295 | slr0838 | slr1963 | slI1362 | smr0005 | slI1580 | slI1883 | slI0047 | slI0990 |
| slr1295 | slr1598 | slI1823 | slr1963 | slr1550 | smr0005 | slI1580 | slr1133 | slI0047 | slI1633 |
| slI0868 | slr1295 | slI1056 | slr1963 | slI1074 | smr0005 | slI1580 | slr0444 | slI0047 | slr0018 |
| slr0994 | slr1295 | slr0520 | slr1963 | slr0649 | smr0005 | slI1580 | slr2130 | slI0047 | slI0567 |
| slI0379 | slr1295 | slI0144 | slr1963 | slI0495 | smr0005 | slI1580 | slI1669 | slI0047 | slr0884 |
| slI1676 | slr1295 | slI0467 | slr1963 | slI1425 | smr0005 | slI1580 | slr0585 | slI0047 | slI1342 |
| slI0927 | slr1295 | slr0711 | slr1963 | slI0502 | smr0005 | slI1580 | slr2075 | slI0047 | slr1349 |
| slI0996 | slr1295 | slI0754 | slr1963 | slr1703 | smr0005 | slI1580 | slr2076 | slI0047 | slI0593 |
| slI0844 | slr1295 | slI0569 | slr1963 | slI0078 | smr0005 | slI0416 | slI1580 | slI0047 | slI0220 |
| slI1615 | slr1295 | slI1277 | slr1963 | slr0557 | smr0005 | slI1580 | slr0156 | slI0047 | slI0899 |
| slI0202 | slr1295 | slI1110 | slr1963 | slr1884 | smr0005 | slI1580 | slr1641 | slI0047 | slr1756 |
| slr0902 | slr1295 | slI1865 | slr1963 | slr1031 | smr0005 | slI1580 | slr0542 | slI0047 | slI1085 |
| slI1144 | slr1295 | slr1228 | slr1963 | slr1793 | smr0005 | slI0534 | slI1580 | slI0047 | slI1931 |
| slr0017 | slr1295 | slr0808 | slr1963 | slr0633 | smr0005 | slI1580 | slr0165 | slI0047 | slI0083 |
| slr1295 | slr1424 | slr0082 | slr1963 | slr1278 | smr0005 | slI0030 | slI1580 | slI0047 | slr1755 |
| slr1295 | slr1423 | slr0742 | slr1963 | slr0783 | smr0005 | slI1580 | slr0847 | slI0047 | slI0057 |
| slI2010 | slr1295 | slI0098 | slr1963 | slI1198 | smr0005 | slI1580 | slr0553 | slI0017 | slI0047 |
| slr0528 | slr1295 | slr1646 | slr1963 | slI0204 | smr0005 | slI1580 | slr0812 | slI0047 | slI1185 |
| slr1295 | slr1351 | slr1130 | slr1963 | slI1750 | smr0005 | slI1580 | slr1347 | slI0047 | slr0839 |
| slI0622 | slr1295 | slr0080 | slr1963 | slI0420 | smr0005 | slI1580 | slr1348 | slI0047 | slI1876 |
| slI0631 | slr1295 | slr0551 | slr1963 | slr1256 | smr0005 | slI1580 | slr1791 | slI0047 | slI0900 |
| slr0787 | slr1295 | slI0145 | slr1963 | slI1639 | smr0005 | slI0594 | slI1580 | slI0047 | slr0608 |
| slI1852 | slr1295 | slI0708 | slr1963 | slr1899 | smr0005 | slI1580 | slr0550 | slI0047 | slr0652 |
| slr1090 | slr1295 | slr0679 | slr1963 | slI0643 | smr0005 | slI1058 | slI1580 | slI0047 | slr0084 |
| slI0902 | slr1295 | slr0722 | slr1963 | slr1844 | smr0005 | slI1580 | slr1665 | slI0047 | slI1893 |
| slr0661 | slr1295 | slr0072 | slr1963 | slI0459 | smr0005 | slI1580 | slr0536 | slI0047 | slr0500 |
| slr0526 | slr1295 | slI1547 | slr1963 | slI0865 | smr0005 | slI1580 | slr1874 | slI0047 | slr1560 |
| slI1249 | slr1295 | slI1234 | slr1963 | slr0733 | smr0005 | slI1580 | slI1776 | slI0047 | slI1988 |
| slI0892 | slr1295 | slI0616 | slr1963 | slI1459 | smr0005 | slI0848 | slI1580 | slI0047 | slr1289 |
| slI0660 | slr1295 | slr1963 | slr2073 | slI0905 | smr0005 | slI0897 | slI1580 | slI0047 | slI1556 |
| slr1295 | slr1779 | slr1639 | slr1963 | slI0402 | slI1398 | slI1580 | slI1933 | slI0047 | ssl3441 |
| slr0394 | slr1295 | slI1108 | slr1963 | slI0728 | slI1398 | slI1580 | slr0965 | slI0047 | slr0744 |
| slr1295 | slr2047 | slI0362 | slr1963 | slI0336 | slI1398 | slI1580 | slr1463 | slI0047 | slr0974 |
| slr0741 | slr1295 | slr0958 | slr1963 | slI1299 | slI1398 | slI1098 | slI1580 | slI0047 | slr1622 |
| slr1295 | slr1510 | slr1720 | slr1963 | slI1398 | ssl2084 | slI1580 | slr0434 | slI0047 | slI1196 |
| slI1043 | slr1295 | slI0179 | slr1963 | slI1398 | slI2001 | slI1261 | slI1580 | slI0047 | slI0745 |
| slr0400 | slr1295 | slI0454 | slr1963 | slI1398 | slI1430 | slI1099 | slI1580 | slI0047 | slI1815 |
| slI1415 | slr1295 | slI1553 | slr1963 | slI0573 | slI1398 | slI1580 | slr0752 | slI0047 | slI1059 |
| slI1909 | slr1295 | slr0638 | slr1963 | slI1398 | slr1898 | slI1580 | slr0952 | slI0047 | slr1123 |
| slI0373 | slr1295 | slr0220 | slr1963 | slI0080 | slI1398 | slI1580 | slr1511 | slI0047 | slI1760 |
| slr1295 | slr2035 | slr0357 | slr1963 | slI1398 | slr1022 | slI1580 | slI1605 | slI0047 | slI0469 |
| slr1295 | slr2132 | slI1362 | slr1963 | slI1398 | slI1883 | slI0990 | slI1580 | slI0047 | slr1517 |
| slr0922 | slr1295 | slr1550 | slr1963 | slI1398 | slr1133 | slI1580 | slI1633 | slI0047 | slI0869 |
| slr0838 | slr1295 | slI1074 | slr1963 | slI1398 | slr0444 | slI1580 | slr0018 | slI0047 | slr1598 |
| slI1823 | slr1295 | slr0649 | slr1963 | slI1398 | slr2130 | slI0567 | slI1580 | slI0047 | slI0868 |
| slI1056 | slr1295 | slI0495 | slr1963 | slI1398 | slI1669 | slI1580 | slr0884 | slI0047 | slr0994 |
| slr0520 | slr1295 | slI1425 | slr1963 | slI1398 | slr0585 | slI1342 | slI1580 | slI0047 | slI0379 |
| slI0144 | slr1295 | slI0502 | slr1963 | slI1398 | slr2075 | slI1580 | slr1349 | slI0047 | slI1676 |
| slI0467 | slr1295 | slr1703 | slr1963 | slI1398 | slr2076 | slI0593 | slI1580 | slI0047 | slI0927 |
| slr0711 | slr1295 | slI0078 | slr1963 | slI0416 | slI1398 | slI0220 | slI1580 | slI0047 | slI0996 |
| slI0754 | slr1295 | slr0557 | slr1963 | slI1398 | slr0156 | slI0899 | slI1580 | slI0047 | slI0844 |

|         |         |         |         |         |         |         |         |         |         |
|---------|---------|---------|---------|---------|---------|---------|---------|---------|---------|
| slI0569 | slr1295 | slr1884 | slr1963 | slI1398 | slr1641 | slI1580 | slr1756 | slI0047 | slI1615 |
| slI1277 | slr1295 | slr1031 | slr1963 | slI1398 | slr0542 | slI1085 | slI1580 | slI0047 | slI0202 |
| slI1110 | slr1295 | slr1793 | slr1963 | slI0534 | slI1398 | slI1580 | slI1931 | slI0047 | slr0902 |
| slI1865 | slr1295 | slr0633 | slr1963 | slI1398 | slr0165 | slI0083 | slI1580 | slI0047 | slI1144 |
| slr1228 | slr1295 | slr1278 | slr1963 | slI0030 | slI1398 | slI1580 | slr1755 | slI0047 | slr0017 |
| slr0808 | slr1295 | slr0783 | slr1963 | slI1398 | slr0847 | slI0057 | slI1580 | slI0047 | slr1424 |
| slr0082 | slr1295 | slI1198 | slr1963 | slI1398 | slr0553 | slI0017 | slI1580 | slI0047 | slr1423 |
| slr0742 | slr1295 | slI0204 | slr1963 | slI1398 | slr0812 | slI1185 | slI1580 | slI0047 | slI2010 |
| slI0098 | slr1295 | slI1750 | slr1963 | slI1398 | slr1347 | slI1580 | slr0839 | slI0047 | slr0528 |
| slr1295 | slr1646 | slI0420 | slr1963 | slI1398 | slr1348 | slI1580 | slI1876 | slI0047 | slr1351 |
| slr1130 | slr1295 | slr1256 | slr1963 | slI1398 | slr1791 | slI0900 | slI1580 | slI0047 | slI0622 |
| slr0080 | slr1295 | slI1639 | slr1963 | slI0594 | slI1398 | slI1580 | slr0608 | slI0047 | slI0631 |
| slr0551 | slr1295 | slr1899 | slr1963 | slI1398 | slr0550 | slI1580 | slr0652 | slI0047 | slr0787 |
| slI0145 | slr1295 | slI0643 | slr1963 | slI1058 | slI1398 | slI1580 | slr0084 | slI0047 | slI1852 |
| slI0708 | slr1295 | slr1844 | slr1963 | slI1398 | slr1665 | slI1580 | slI1893 | slI0047 | slr1090 |
| slr0679 | slr1295 | slI0459 | slr1963 | slI1398 | slr0536 | slI1580 | slr0500 | slI0047 | slI0902 |
| slr0722 | slr1295 | slI0865 | slr1963 | slI1398 | slr1874 | slI1580 | slr1560 | slI0047 | slr0661 |
| slr0072 | slr1295 | slr0733 | slr1963 | slI1398 | slI1776 | slI1580 | slI1988 | slI0047 | slr0526 |
| slI1547 | slr1295 | slI1459 | slr1963 | slI0848 | slI1398 | slI1580 | slr1289 | slI0047 | slI1249 |
| slI1234 | slr1295 | slI0905 | slr1963 | slI0897 | slI1398 | slI1556 | slI1580 | slI0047 | slI0892 |
| slI0616 | slr1295 | slI0402 | slr0343 | slI1398 | slI1933 | slI1580 | ssl3441 | slI0047 | slI0660 |
| slr1295 | slr2073 | slI0728 | slr0343 | slI1398 | slr0965 | slI1580 | slr0744 | slI0047 | slr1779 |
| slr1295 | slr1639 | slI0336 | slr0343 | slI1398 | slr1463 | slI1580 | slr0974 | slI0047 | slr0394 |
| slI1108 | slr1295 | slI1299 | slr0343 | slI1098 | slI1398 | slI1580 | slr1622 | slI0047 | slr2047 |
| slI0362 | slr1295 | slr0343 | ssl2084 | slI1398 | slr0434 | slI1196 | slI1580 | slI0047 | slr0741 |
| slr0958 | slr1295 | slI2001 | slr0343 | slI1261 | slI1398 | slI0745 | slI1580 | slI0047 | slr1510 |
| slr1295 | slr1720 | slI1430 | slr0343 | slI1099 | slI1398 | slI1580 | slI1815 | slI0047 | slI1043 |
| slI0179 | slr1295 | slI0573 | slr0343 | slI1398 | slr0752 | slI1059 | slI1580 | slI0047 | slr0400 |
| slI0454 | slr1295 | slr0343 | slr1898 | slI1398 | slr0952 | slI1580 | slr1123 | slI0047 | slI1415 |
| slI1553 | slr1295 | slI0080 | slr0343 | slI1398 | slr1511 | slI1580 | slI1760 | slI0047 | slI1909 |
| slr0638 | slr1295 | slr0343 | slr1022 | slI1398 | slI1605 | slI0469 | slI1580 | slI0047 | slI0373 |
| slr0220 | slr1295 | slI1883 | slr0343 | slI0990 | slI1398 | slI1580 | slr1517 | slI0047 | slr2035 |
| slr0357 | slr1295 | slr0343 | slr1133 | slI1398 | slI1633 | slI0869 | slI1580 | slI0047 | slr2132 |
| slI1362 | slr1295 | slr0343 | slr0444 | slI1398 | slr0018 | slI1580 | slr1598 | slI0047 | slr0922 |
| slr1295 | slr1550 | slr0343 | slr2130 | slI0567 | slI1398 | slI0868 | slI1580 | slI0047 | slr0838 |
| slI1074 | slr1295 | slI1669 | slr0343 | slI1398 | slr0884 | slI1580 | slr0994 | slI0047 | slI1823 |
| slr0649 | slr1295 | slr0343 | slr0585 | slI1342 | slI1398 | slI0379 | slI1580 | slI0047 | slI1056 |
| slI0495 | slr1295 | slr0343 | slr2075 | slI1398 | slr1349 | slI1580 | slI1676 | slI0047 | slr0520 |
| slI1425 | slr1295 | slr0343 | slr2076 | slI0593 | slI1398 | slI0927 | slI1580 | slI0047 | slI0144 |
| slI0502 | slr1295 | slI0416 | slr0343 | slI0220 | slI1398 | slI0996 | slI1580 | slI0047 | slI0467 |
| slr1295 | slr1703 | slr0156 | slr0343 | slI0899 | slI1398 | slI0844 | slI1580 | slI0047 | slr0711 |
| slI0078 | slr1295 | slr0343 | slr1641 | slI1398 | slr1756 | slI1580 | slI1615 | slI0047 | slI0754 |
| slr0557 | slr1295 | slr0343 | slr0542 | slI1085 | slI1398 | slI0202 | slI1580 | slI0047 | slI0569 |
| slr1295 | slr1884 | slI0534 | slr0343 | slI1398 | slI1931 | slI1580 | slr0902 | slI0047 | slI1277 |
| slr1031 | slr1295 | slr0165 | slr0343 | slI0083 | slI1398 | slI1144 | slI1580 | slI0047 | slI1110 |
| slr1295 | slr1793 | slI0030 | slr0343 | slI1398 | slr1755 | slI1580 | slr0017 | slI0047 | slI1865 |
| slr0633 | slr1295 | slr0343 | slr0847 | slI0057 | slI1398 | slI1580 | slr1424 | slI0047 | slr1228 |
| slr1278 | slr1295 | slr0343 | slr0553 | slI0017 | slI1398 | slI1580 | slr1423 | slI0047 | slr0808 |
| slr0783 | slr1295 | slr0343 | slr0812 | slI1185 | slI1398 | slI1580 | slI2010 | slI0047 | slr0082 |
| slI1198 | slr1295 | slr0343 | slr1347 | slI1398 | slr0839 | slI1580 | slr0528 | slI0047 | slr0742 |
| slI0204 | slr1295 | slr0343 | slr1348 | slI1398 | slI1876 | slI1580 | slr1351 | slI0047 | slI0098 |

|         |         |         |         |         |         |         |         |         |         |
|---------|---------|---------|---------|---------|---------|---------|---------|---------|---------|
| slI1750 | slr1295 | slr0343 | slr1791 | slI0900 | slI1398 | slI0622 | slI1580 | slI0047 | slr1646 |
| slI0420 | slr1295 | slI0594 | slr0343 | slI1398 | slr0608 | slI0631 | slI1580 | slI0047 | slr1130 |
| slr1256 | slr1295 | slr0343 | slr0550 | slI1398 | slr0652 | slI1580 | slr0787 | slI0047 | slr0080 |
| slI1639 | slr1295 | slI1058 | slr0343 | slI1398 | slr0084 | slI1580 | slI1852 | slI0047 | slr0551 |
| slr1295 | slr1899 | slr0343 | slr1665 | slI1398 | slI1893 | slI1580 | slr1090 | slI0047 | slI0145 |
| slI0643 | slr1295 | slr0343 | slr0536 | slI1398 | slr0500 | slI0902 | slI1580 | slI0047 | slI0708 |
| slr1295 | slr1844 | slr0343 | slr1874 | slI1398 | slr1560 | slI1580 | slr0661 | slI0047 | slr0679 |
| slI0459 | slr1295 | slI1776 | slr0343 | slI1398 | slI1988 | slI1580 | slr0526 | slI0047 | slr0722 |
| slI0865 | slr1295 | slI0848 | slr0343 | slI1398 | slr1289 | slI1249 | slI1580 | slI0047 | slr0072 |
| slr0733 | slr1295 | slI0897 | slr0343 | slI1398 | slI1556 | slI0892 | slI1580 | slI0047 | slI1547 |
| slI1459 | slr1295 | slI1933 | slr0343 | slI1398 | ssl3441 | slI0660 | slI1580 | slI0047 | slI1234 |
| slI0905 | slr1295 | slr0343 | slr0965 | slI1398 | slr0744 | slI1580 | slr1779 | slI0047 | slI0616 |
| slI0402 | slr0513 | slr0343 | slr1463 | slI1398 | slr0974 | slI1580 | slr0394 | slI0047 | slr2073 |
| slI0728 | slr0513 | slI1098 | slr0343 | slI1398 | slr1622 | slI1580 | slr2047 | slI0047 | slr1639 |
| slI0336 | slr0513 | slr0343 | slr0434 | slI1196 | slI1398 | slI1580 | slr0741 | slI0047 | slI1108 |
| slI1299 | slr0513 | slI1261 | slr0343 | slI0745 | slI1398 | slI1580 | slr1510 | slI0047 | slI0362 |
| slr0513 | ssl2084 | slI1099 | slr0343 | slI1398 | slI1815 | slI1043 | slI1580 | slI0047 | slr0958 |
| slI2001 | slr0513 | slr0343 | slr0752 | slI1059 | slI1398 | slI1580 | slr0400 | slI0047 | slr1720 |
| slI1430 | slr0513 | slr0343 | slr0952 | slI1398 | slr1123 | slI1415 | slI1580 | slI0047 | slI0179 |
| slI0573 | slr0513 | slr0343 | slr1511 | slI1398 | slI1760 | slI1580 | slI1909 | slI0047 | slI0454 |
| slr0513 | slr1898 | slI1605 | slr0343 | slI0469 | slI1398 | slI0373 | slI1580 | slI0047 | slI1553 |
| slI0080 | slr0513 | slI0990 | slr0343 | slI1398 | slr1517 | slI1580 | slr2035 | slI0047 | slr0638 |
| slr0513 | slr1022 | slI1633 | slr0343 | slI0869 | slI1398 | slI1580 | slr2132 | slI0047 | slr0220 |
| slI1883 | slr0513 | slr0018 | slr0343 | slI1398 | slr1598 | slI1580 | slr0922 | slI0047 | slr0357 |
| slr0513 | slr1133 | slI0567 | slr0343 | slI0868 | slI1398 | slI1580 | slr0838 | slI0047 | slI1362 |
| slr0444 | slr0513 | slr0343 | slr0884 | slI1398 | slr0994 | slI1580 | slI1823 | slI0047 | slr1550 |
| slr0513 | slr2130 | slI1342 | slr0343 | slI0379 | slI1398 | slI1056 | slI1580 | slI0047 | slI1074 |
| slI1669 | slr0513 | slr0343 | slr1349 | slI1398 | slI1676 | slI1580 | slr0520 | slI0047 | slr0649 |
| slr0513 | slr0585 | slI0593 | slr0343 | slI0927 | slI1398 | slI0144 | slI1580 | slI0047 | slI0495 |
| slr0513 | slr2075 | slI0220 | slr0343 | slI0996 | slI1398 | slI0467 | slI1580 | slI0047 | slI1425 |
| slr0513 | slr2076 | slI0899 | slr0343 | slI0844 | slI1398 | slI1580 | slr0711 | slI0047 | slI0502 |
| slI0416 | slr0513 | slr0343 | slr1756 | slI1398 | slI1615 | slI0754 | slI1580 | slI0047 | slr1703 |
| slr0156 | slr0513 | slI1085 | slr0343 | slI0202 | slI1398 | slI0569 | slI1580 | slI0047 | slI0078 |
| slr0513 | slr1641 | slI1931 | slr0343 | slI1398 | slr0902 | slI1277 | slI1580 | slI0047 | slr0557 |
| slr0513 | slr0542 | slI0083 | slr0343 | slI1144 | slI1398 | slI1110 | slI1580 | slI0047 | slr1884 |
| slI0534 | slr0513 | slr0343 | slr1755 | slI1398 | slr0017 | slI1580 | slI1865 | slI0047 | slr1031 |
| slr0165 | slr0513 | slI0057 | slr0343 | slI1398 | slr1424 | slI1580 | slr1228 | slI0047 | slr1793 |
| slI0030 | slr0513 | slI0017 | slr0343 | slI1398 | slr1423 | slI1580 | slr0808 | slI0047 | slr0633 |
| slr0513 | slr0847 | slI1185 | slr0343 | slI1398 | slI2010 | slI1580 | slr0082 | slI0047 | slr1278 |
| slr0513 | slr0553 | slr0343 | slr0839 | slI1398 | slr0528 | slI1580 | slr0742 | slI0047 | slr0783 |
| slr0513 | slr0812 | slI1876 | slr0343 | slI1398 | slr1351 | slI0098 | slI1580 | slI0047 | slI1198 |
| slr0513 | slr1347 | slI0900 | slr0343 | slI0622 | slI1398 | slI1580 | slr1646 | slI0047 | slI0204 |
| slr0513 | slr1348 | slr0343 | slr0608 | slI0631 | slI1398 | slI1580 | slr1130 | slI0047 | slI1750 |
| slr0513 | slr1791 | slr0343 | slr0652 | slI1398 | slr0787 | slI1580 | slr0080 | slI0047 | slI0420 |
| slI0594 | slr0513 | slr0084 | slr0343 | slI1398 | slI1852 | slI1580 | slr0551 | slI0047 | slr1256 |
| slr0513 | slr0550 | slI1893 | slr0343 | slI1398 | slr1090 | slI0145 | slI1580 | slI0047 | slI1639 |
| slI1058 | slr0513 | slr0343 | slr0500 | slI0902 | slI1398 | slI0708 | slI1580 | slI0047 | slr1899 |
| slr0513 | slr1665 | slr0343 | slr1560 | slI1398 | slr0661 | slI1580 | slr0679 | slI0047 | slI0643 |
| slr0513 | slr0536 | slI1988 | slr0343 | slI1398 | slr0526 | slI1580 | slr0722 | slI0047 | slr1844 |
| slr0513 | slr1874 | slr0343 | slr1289 | slI1249 | slI1398 | slI1580 | slr0072 | slI0047 | slI0459 |
| slI1776 | slr0513 | slI1556 | slr0343 | slI0892 | slI1398 | slI1547 | slI1580 | slI0047 | slI0865 |

|         |         |         |         |         |         |         |         |         |         |
|---------|---------|---------|---------|---------|---------|---------|---------|---------|---------|
| sll0848 | slr0513 | slr0343 | ssl3441 | sll0660 | sll1398 | sll1234 | sll1580 | sll0047 | slr0733 |
| sll0897 | slr0513 | slr0343 | slr0744 | sll1398 | slr1779 | sll0616 | sll1580 | sll0047 | sll1459 |
| sll1933 | slr0513 | slr0343 | slr0974 | sll1398 | slr0394 | sll1580 | slr2073 | sll0047 | sll0905 |
| slr0513 | slr0965 | slr0343 | slr1622 | sll1398 | slr2047 | sll1580 | slr1639 | sll0402 | slr0823 |
| slr0513 | slr1463 | sll1196 | slr0343 | sll1398 | slr0741 | sll1108 | sll1580 | sll0728 | slr0823 |
| sll1098 | slr0513 | sll0745 | slr0343 | sll1398 | slr1510 | sll0362 | sll1580 | sll0336 | slr0823 |
| slr0434 | slr0513 | sll1815 | slr0343 | sll1043 | sll1398 | sll1580 | slr0958 | sll1299 | slr0823 |
| sll1261 | slr0513 | sll1059 | slr0343 | sll1398 | slr0400 | sll1580 | slr1720 | slr0823 | ssl2084 |
| sll1099 | slr0513 | slr0343 | slr1123 | sll1398 | sll1415 | sll0179 | sll1580 | sll2001 | slr0823 |
| slr0513 | slr0752 | sll1760 | slr0343 | sll1398 | sll1909 | sll0454 | sll1580 | sll1430 | slr0823 |
| slr0513 | slr0952 | sll0469 | slr0343 | sll0373 | sll1398 | sll1553 | sll1580 | sll0573 | slr0823 |
| sll1605 | slr0513 | slr0343 | slr1517 | sll1398 | slr2035 | sll1580 | slr0638 | slr0823 | slr1898 |
| sll0990 | slr0513 | sll0869 | slr0343 | sll1398 | slr2132 | sll1580 | slr0220 | sll0080 | slr0823 |
| sll1633 | slr0513 | slr0343 | slr1598 | sll1398 | slr0922 | sll1580 | slr0357 | slr0823 | slr1022 |
| slr0018 | slr0513 | sll0868 | slr0343 | sll1398 | slr0838 | sll1362 | sll1580 | sll1883 | slr0823 |
| sll0567 | slr0513 | slr0343 | slr0994 | sll1398 | sll1823 | sll1580 | slr1550 | slr0823 | slr1133 |
| slr0513 | slr0884 | sll0379 | slr0343 | sll1056 | sll1398 | sll1074 | sll1580 | slr0444 | slr0823 |
| sll1342 | slr0513 | sll1676 | slr0343 | sll1398 | slr0520 | sll1580 | slr0649 | slr0823 | slr2130 |
| slr0513 | slr1349 | sll0927 | slr0343 | sll0144 | sll1398 | sll0495 | sll1580 | sll1669 | slr0823 |
| sll0593 | slr0513 | sll0996 | slr0343 | sll0467 | sll1398 | sll1425 | sll1580 | slr0585 | slr0823 |
| sll0220 | slr0513 | sll0844 | slr0343 | sll1398 | slr0711 | sll0502 | sll1580 | slr0823 | slr2075 |
| sll0899 | slr0513 | sll1615 | slr0343 | sll0754 | sll1398 | sll1580 | slr1703 | slr0823 | slr2076 |
| slr0513 | slr1756 | sll0202 | slr0343 | sll0569 | sll1398 | sll0078 | sll1580 | sll0416 | slr0823 |
| sll1085 | slr0513 | slr0343 | slr0902 | sll1277 | sll1398 | sll1580 | slr0557 | slr0156 | slr0823 |
| sll1931 | slr0513 | sll1144 | slr0343 | sll1110 | sll1398 | sll1580 | slr1884 | slr0823 | slr1641 |
| sll0083 | slr0513 | slr0017 | slr0343 | sll1398 | sll1865 | sll1580 | slr1031 | slr0542 | slr0823 |
| slr0513 | slr1755 | slr0343 | slr1424 | sll1398 | slr1228 | sll1580 | slr1793 | sll0534 | slr0823 |
| sll0057 | slr0513 | slr0343 | slr1423 | sll1398 | slr0808 | sll1580 | slr0633 | slr0165 | slr0823 |
| sll0017 | slr0513 | sll2010 | slr0343 | sll1398 | slr0082 | sll1580 | slr1278 | sll0030 | slr0823 |
| sll1185 | slr0513 | slr0343 | slr0528 | sll1398 | slr0742 | sll1580 | slr0783 | slr0823 | slr0847 |
| slr0513 | slr0839 | slr0343 | slr1351 | sll0098 | sll1398 | sll1198 | sll1580 | slr0553 | slr0823 |
| sll1876 | slr0513 | sll0622 | slr0343 | sll1398 | slr1646 | sll0204 | sll1580 | slr0812 | slr0823 |
| sll0900 | slr0513 | sll0631 | slr0343 | sll1398 | slr1130 | sll1580 | sll1750 | slr0823 | slr1347 |
| slr0513 | slr0608 | slr0343 | slr0787 | sll1398 | slr0080 | sll0420 | sll1580 | slr0823 | slr1348 |
| slr0513 | slr0652 | sll1852 | slr0343 | sll1398 | slr0551 | sll1580 | slr1256 | slr0823 | slr1791 |
| slr0084 | slr0513 | slr0343 | slr1090 | sll0145 | sll1398 | sll1580 | sll1639 | sll0594 | slr0823 |
| sll1893 | slr0513 | sll0902 | slr0343 | sll0708 | sll1398 | sll1580 | slr1899 | slr0550 | slr0823 |
| slr0500 | slr0513 | slr0343 | slr0661 | sll1398 | slr0679 | sll0643 | sll1580 | sll1058 | slr0823 |
| slr0513 | slr1560 | slr0343 | slr0526 | sll1398 | slr0722 | sll1580 | slr1844 | slr0823 | slr1665 |
| sll1988 | slr0513 | sll1249 | slr0343 | sll1398 | slr0072 | sll0459 | sll1580 | slr0536 | slr0823 |
| slr0513 | slr1289 | sll0892 | slr0343 | sll1398 | sll1547 | sll0865 | sll1580 | slr0823 | slr1874 |
| sll1556 | slr0513 | sll0660 | slr0343 | sll1234 | sll1398 | sll1580 | slr0733 | sll1776 | slr0823 |
| slr0513 | ssl3441 | slr0343 | slr1779 | sll0616 | sll1398 | sll1459 | sll1580 | sll0848 | slr0823 |
| slr0513 | slr0744 | slr0343 | slr0394 | sll1398 | slr2073 | sll0905 | sll1580 | sll0897 | slr0823 |
| slr0513 | slr0974 | slr0343 | slr2047 | sll1398 | slr1639 | sll0402 | sll1579 | sll1933 | slr0823 |
| slr0513 | slr1622 | slr0343 | slr0741 | sll1108 | sll1398 | sll0728 | sll1579 | slr0823 | slr0965 |
| sll1196 | slr0513 | slr0343 | slr1510 | sll0362 | sll1398 | sll0336 | sll1579 | slr0823 | slr1463 |
| sll0745 | slr0513 | sll1043 | slr0343 | sll1398 | slr0958 | sll1299 | sll1579 | sll1098 | slr0823 |
| sll1815 | slr0513 | slr0343 | slr0400 | sll1398 | slr1720 | sll1579 | ssl2084 | slr0434 | slr0823 |
| sll1059 | slr0513 | sll1415 | slr0343 | sll0179 | sll1398 | sll1579 | sll2001 | sll1261 | slr0823 |
| slr0513 | slr1123 | sll1909 | slr0343 | sll0454 | sll1398 | sll1430 | sll1579 | sll1099 | slr0823 |

|         |         |         |         |         |         |         |         |         |         |
|---------|---------|---------|---------|---------|---------|---------|---------|---------|---------|
| sll1760 | slr0513 | sll0373 | slr0343 | sll1398 | sll1553 | sll0573 | sll1579 | slr0752 | slr0823 |
| sll0469 | slr0513 | slr0343 | slr2035 | sll1398 | slr0638 | sll1579 | slr1898 | slr0823 | slr0952 |
| slr0513 | slr1517 | slr0343 | slr2132 | sll1398 | slr0220 | sll0080 | sll1579 | slr0823 | slr1511 |
| sll0869 | slr0513 | slr0343 | slr0922 | sll1398 | slr0357 | sll1579 | slr1022 | sll1605 | slr0823 |
| slr0513 | slr1598 | slr0343 | slr0838 | sll1362 | sll1398 | sll1579 | sll1883 | sll0990 | slr0823 |
| sll0868 | slr0513 | sll1823 | slr0343 | sll1398 | slr1550 | sll1579 | slr1133 | sll1633 | slr0823 |
| slr0513 | slr0994 | sll1056 | slr0343 | sll1074 | sll1398 | sll1579 | slr0444 | slr0018 | slr0823 |
| sll0379 | slr0513 | slr0343 | slr0520 | sll1398 | slr0649 | sll1579 | slr2130 | sll0567 | slr0823 |
| sll1676 | slr0513 | sll0144 | slr0343 | sll0495 | sll1398 | sll1579 | sll1669 | slr0823 | slr0884 |
| sll0927 | slr0513 | sll0467 | slr0343 | sll1398 | sll1425 | sll1579 | slr0585 | sll1342 | slr0823 |
| sll0996 | slr0513 | slr0343 | slr0711 | sll0502 | sll1398 | sll1579 | slr2075 | slr0823 | slr1349 |
| sll0844 | slr0513 | sll0754 | slr0343 | sll1398 | slr1703 | sll1579 | slr2076 | sll0593 | slr0823 |
| sll1615 | slr0513 | sll0569 | slr0343 | sll0078 | sll1398 | sll0416 | sll1579 | sll0220 | slr0823 |
| sll0202 | slr0513 | sll1277 | slr0343 | sll1398 | slr0557 | sll1579 | slr0156 | sll0899 | slr0823 |
| slr0513 | slr0902 | sll1110 | slr0343 | sll1398 | slr1884 | sll1579 | slr1641 | slr0823 | slr1756 |
| sll1144 | slr0513 | sll1865 | slr0343 | sll1398 | slr1031 | sll1579 | slr0542 | sll1085 | slr0823 |
| slr0017 | slr0513 | slr0343 | slr1228 | sll1398 | slr1793 | sll0534 | sll1579 | sll1931 | slr0823 |
| slr0513 | slr1424 | slr0343 | slr0808 | sll1398 | slr0633 | sll1579 | slr0165 | sll0083 | slr0823 |
| slr0513 | slr1423 | slr0082 | slr0343 | sll1398 | slr1278 | sll0030 | sll1579 | slr0823 | slr1755 |
| sll2010 | slr0513 | slr0343 | slr0742 | sll1398 | slr0783 | sll1579 | slr0847 | sll0057 | slr0823 |
| slr0513 | slr0528 | sll0098 | slr0343 | sll1198 | sll1398 | sll1579 | slr0553 | sll0017 | slr0823 |
| slr0513 | slr1351 | slr0343 | slr1646 | sll0204 | sll1398 | sll1579 | slr0812 | sll1185 | slr0823 |
| sll0622 | slr0513 | slr0343 | slr1130 | sll1398 | sll1750 | sll1579 | slr1347 | slr0823 | slr0839 |
| sll0631 | slr0513 | slr0080 | slr0343 | sll0420 | sll1398 | sll1579 | slr1348 | sll1876 | slr0823 |
| slr0513 | slr0787 | slr0343 | slr0551 | sll1398 | slr1256 | sll1579 | slr1791 | sll0900 | slr0823 |
| sll1852 | slr0513 | sll0145 | slr0343 | sll1398 | sll1639 | sll0594 | sll1579 | slr0608 | slr0823 |
| slr0513 | slr1090 | sll0708 | slr0343 | sll1398 | slr1899 | sll1579 | slr0550 | slr0652 | slr0823 |
| sll0902 | slr0513 | slr0343 | slr0679 | sll0643 | sll1398 | sll1058 | sll1579 | slr0084 | slr0823 |
| slr0513 | slr0661 | slr0343 | slr0722 | sll1398 | slr1844 | sll1579 | slr1665 | sll1893 | slr0823 |
| slr0513 | slr0526 | slr0072 | slr0343 | sll0459 | sll1398 | sll1579 | slr0536 | slr0500 | slr0823 |
| sll1249 | slr0513 | sll1547 | slr0343 | sll0865 | sll1398 | sll1579 | slr1874 | slr0823 | slr1560 |
| sll0892 | slr0513 | sll1234 | slr0343 | sll1398 | sll1459 | sll1579 | sll1776 | sll1988 | slr0823 |
| sll0660 | slr0513 | sll0616 | slr0343 | sll0905 | sll1398 | sll0848 | sll1579 | slr0823 | slr1289 |
| slr0513 | slr1779 | slr0343 | slr2073 | sll0402 | slr1181 | sll0897 | sll1579 | sll1556 | slr0823 |
| slr0394 | slr0513 | slr0343 | slr1639 | sll0728 | slr1181 | sll1579 | sll1933 | slr0823 | ssl3441 |
| slr0513 | slr2047 | sll1108 | slr0343 | sll0336 | slr1181 | sll1579 | slr0965 | slr0744 | slr0823 |
| slr0513 | slr0741 | sll0362 | slr0343 | sll1299 | slr1181 | sll1579 | slr1463 | slr0823 | slr0974 |
| slr0513 | slr1510 | slr0343 | slr0958 | slr1181 | ssl2084 | sll1098 | sll1579 | slr0823 | slr1622 |
| sll1043 | slr0513 | slr0343 | slr1720 | sll2001 | slr1181 | sll1579 | slr0434 | sll1196 | slr0823 |
| slr0400 | slr0513 | sll0179 | slr0343 | sll1430 | slr1181 | sll1261 | sll1579 | sll0745 | slr0823 |
| sll1415 | slr0513 | sll0454 | slr0343 | sll0573 | slr1181 | sll1099 | sll1579 | sll1815 | slr0823 |
| sll1909 | slr0513 | sll1553 | slr0343 | slr1181 | slr1898 | sll1579 | slr0752 | sll1059 | slr0823 |
| sll0373 | slr0513 | slr0343 | slr0638 | sll0080 | slr1181 | sll1579 | slr0952 | slr0823 | slr1123 |
| slr0513 | slr2035 | slr0220 | slr0343 | slr1022 | slr1181 | sll1579 | slr1511 | sll1760 | slr0823 |
| slr0513 | slr2132 | slr0343 | slr0357 | sll1883 | slr1181 | sll1579 | sll1605 | sll0469 | slr0823 |
| slr0513 | slr0922 | sll1362 | slr0343 | slr1133 | slr1181 | sll0990 | sll1579 | slr0823 | slr1517 |
| slr0513 | slr0838 | slr0343 | slr1550 | slr0444 | slr1181 | sll1579 | sll1633 | sll0869 | slr0823 |
| sll1823 | slr0513 | sll1074 | slr0343 | slr1181 | slr2130 | sll1579 | slr0018 | slr0823 | slr1598 |
| sll1056 | slr0513 | slr0343 | slr0649 | sll1669 | slr1181 | sll0567 | sll1579 | sll0868 | slr0823 |
| slr0513 | slr0520 | sll0495 | slr0343 | slr0585 | slr1181 | sll1579 | slr0884 | slr0823 | slr0994 |
| sll0144 | slr0513 | sll1425 | slr0343 | slr1181 | slr2075 | sll1342 | sll1579 | sll0379 | slr0823 |

|         |         |         |         |         |         |         |         |         |         |
|---------|---------|---------|---------|---------|---------|---------|---------|---------|---------|
| slI0467 | slr0513 | slI0502 | slr0343 | slr1181 | slr2076 | slI1579 | slr1349 | slI1676 | slr0823 |
| slr0513 | slr0711 | slr0343 | slr1703 | slI0416 | slr1181 | slI0593 | slI1579 | slI0927 | slr0823 |
| slI0754 | slr0513 | slI0078 | slr0343 | slr0156 | slr1181 | slI0220 | slI1579 | slI0996 | slr0823 |
| slI0569 | slr0513 | slr0343 | slr0557 | slr1181 | slr1641 | slI0899 | slI1579 | slI0844 | slr0823 |
| slI1277 | slr0513 | slr0343 | slr1884 | slr0542 | slr1181 | slI1579 | slr1756 | slI1615 | slr0823 |
| slI1110 | slr0513 | slr0343 | slr1031 | slI0534 | slr1181 | slI1085 | slI1579 | slI0202 | slr0823 |
| slI1865 | slr0513 | slr0343 | slr1793 | slr0165 | slr1181 | slI1579 | slI1931 | slr0823 | slr0902 |
| slr0513 | slr1228 | slr0343 | slr0633 | slI0030 | slr1181 | slI0083 | slI1579 | slI1144 | slr0823 |
| slr0513 | slr0808 | slr0343 | slr1278 | slr0847 | slr1181 | slI1579 | slr1755 | slr0017 | slr0823 |
| slr0082 | slr0513 | slr0343 | slr0783 | slr0553 | slr1181 | slI0057 | slI1579 | slr0823 | slr1424 |
| slr0513 | slr0742 | slI1198 | slr0343 | slr0812 | slr1181 | slI0017 | slI1579 | slr0823 | slr1423 |
| slI0098 | slr0513 | slI0204 | slr0343 | slr1181 | slr1347 | slI1185 | slI1579 | slI2010 | slr0823 |
| slr0513 | slr1646 | slI1750 | slr0343 | slr1181 | slr1348 | slI1579 | slr0839 | slr0528 | slr0823 |
| slr0513 | slr1130 | slI0420 | slr0343 | slr1181 | slr1791 | slI1579 | slI1876 | slr0823 | slr1351 |
| slr0080 | slr0513 | slr0343 | slr1256 | slI0594 | slr1181 | slI0900 | slI1579 | slI0622 | slr0823 |
| slr0513 | slr0551 | slI1639 | slr0343 | slr0550 | slr1181 | slI1579 | slr0608 | slI0631 | slr0823 |
| slI0145 | slr0513 | slr0343 | slr1899 | slI1058 | slr1181 | slI1579 | slr0652 | slr0787 | slr0823 |
| slI0708 | slr0513 | slI0643 | slr0343 | slr1181 | slr1665 | slI1579 | slr0084 | slI1852 | slr0823 |
| slr0513 | slr0679 | slr0343 | slr1844 | slr0536 | slr1181 | slI1579 | slI1893 | slr0823 | slr1090 |
| slr0513 | slr0722 | slI0459 | slr0343 | slr1181 | slr1874 | slI1579 | slr0500 | slI0902 | slr0823 |
| slr0072 | slr0513 | slI0865 | slr0343 | slI1776 | slr1181 | slI1579 | slr1560 | slr0661 | slr0823 |
| slI1547 | slr0513 | slr0343 | slr0733 | slI0848 | slr1181 | slI1579 | slI1988 | slr0526 | slr0823 |
| slI1234 | slr0513 | slI1459 | slr0343 | slI0897 | slr1181 | slI1579 | slr1289 | slI1249 | slr0823 |
| slI0616 | slr0513 | slI0905 | slr0343 | slI1933 | slr1181 | slI1556 | slI1579 | slI0892 | slr0823 |
| slr0513 | slr2073 | slI0402 | smr0010 | slr0965 | slr1181 | slI1579 | ssl3441 | slI0660 | slr0823 |
| slr0513 | slr1639 | slI0728 | smr0010 | slr1181 | slr1463 | slI1579 | slr0744 | slr0823 | slr1779 |
| slI1108 | slr0513 | slI0336 | smr0010 | slI1098 | slr1181 | slI1579 | slr0974 | slr0394 | slr0823 |
| slI0362 | slr0513 | slI1299 | smr0010 | slr0434 | slr1181 | slI1579 | slr1622 | slr0823 | slr2047 |
| slr0513 | slr0958 | smr0010 | ssl2084 | slI1261 | slr1181 | slI1196 | slI1579 | slr0741 | slr0823 |
| slr0513 | slr1720 | slI2001 | smr0010 | slI1099 | slr1181 | slI0745 | slI1579 | slr0823 | slr1510 |
| slI0179 | slr0513 | slI1430 | smr0010 | slr0752 | slr1181 | slI1579 | slI1815 | slI1043 | slr0823 |
| slI0454 | slr0513 | slI0573 | smr0010 | slr0952 | slr1181 | slI1059 | slI1579 | slr0400 | slr0823 |
| slI1553 | slr0513 | slr1898 | smr0010 | slr1181 | slr1511 | slI1579 | slr1123 | slI1415 | slr0823 |
| slr0513 | slr0638 | slI0080 | smr0010 | slI1605 | slr1181 | slI1579 | slI1760 | slI1909 | slr0823 |
| slr0220 | slr0513 | slr1022 | smr0010 | slI0990 | slr1181 | slI0469 | slI1579 | slI0373 | slr0823 |
| slr0357 | slr0513 | slI1883 | smr0010 | slI1633 | slr1181 | slI1579 | slr1517 | slr0823 | slr2035 |
| slI1362 | slr0513 | slr1133 | smr0010 | slr0018 | slr1181 | slI0869 | slI1579 | slr0823 | slr2132 |
| slr0513 | slr1550 | slr0444 | smr0010 | slI0567 | slr1181 | slI1579 | slr1598 | slr0823 | slr0922 |
| slI1074 | slr0513 | slr2130 | smr0010 | slr0884 | slr1181 | slI0868 | slI1579 | slr0823 | slr0838 |
| slr0513 | slr0649 | slI1669 | smr0010 | slI1342 | slr1181 | slI1579 | slr0994 | slI1823 | slr0823 |
| slI0495 | slr0513 | slr0585 | smr0010 | slr1181 | slr1349 | slI0379 | slI1579 | slI1056 | slr0823 |
| slI1425 | slr0513 | slr2075 | smr0010 | slI0593 | slr1181 | slI1579 | slI1676 | slr0520 | slr0823 |
| slI0502 | slr0513 | slr2076 | smr0010 | slI0220 | slr1181 | slI0927 | slI1579 | slI0144 | slr0823 |
| slr0513 | slr1703 | slI0416 | smr0010 | slI0899 | slr1181 | slI0996 | slI1579 | slI0467 | slr0823 |
| slI0078 | slr0513 | slr0156 | smr0010 | slr1181 | slr1756 | slI0844 | slI1579 | slr0711 | slr0823 |
| slr0513 | slr0557 | slr1641 | smr0010 | slI1085 | slr1181 | slI1579 | slI1615 | slI0754 | slr0823 |
| slr0513 | slr1884 | slr0542 | smr0010 | slI1931 | slr1181 | slI0202 | slI1579 | slI0569 | slr0823 |
| slr0513 | slr1031 | slI0534 | smr0010 | slI0083 | slr1181 | slI1579 | slr0902 | slI1277 | slr0823 |
| slr0513 | slr1793 | slr0165 | smr0010 | slr1181 | slr1755 | slI1144 | slI1579 | slI1110 | slr0823 |
| slr0513 | slr0633 | slI0030 | smr0010 | slI0057 | slr1181 | slI1579 | slr0017 | slI1865 | slr0823 |
| slr0513 | slr1278 | slr0847 | smr0010 | slI0017 | slr1181 | slI1579 | slr1424 | slr0823 | slr1228 |

|         |         |         |         |         |         |         |         |         |         |
|---------|---------|---------|---------|---------|---------|---------|---------|---------|---------|
| slr0513 | slr0783 | slr0553 | smr0010 | sll1185 | slr1181 | sll1579 | slr1423 | slr0808 | slr0823 |
| sll1198 | slr0513 | slr0812 | smr0010 | slr0839 | slr1181 | sll1579 | sll2010 | slr0082 | slr0823 |
| sll0204 | slr0513 | slr1347 | smr0010 | sll1876 | slr1181 | sll1579 | slr0528 | slr0742 | slr0823 |
| sll1750 | slr0513 | slr1348 | smr0010 | sll0900 | slr1181 | sll1579 | slr1351 | sll0098 | slr0823 |
| sll0420 | slr0513 | slr1791 | smr0010 | slr0608 | slr1181 | sll0622 | sll1579 | slr0823 | slr1646 |
| slr0513 | slr1256 | sll0594 | smr0010 | slr0652 | slr1181 | sll0631 | sll1579 | slr0823 | slr1130 |
| sll1639 | slr0513 | slr0550 | smr0010 | slr0084 | slr1181 | sll1579 | slr0787 | slr0080 | slr0823 |
| slr0513 | slr1899 | sll1058 | smr0010 | sll1893 | slr1181 | sll1579 | sll1852 | slr0551 | slr0823 |
| sll0643 | slr0513 | slr1665 | smr0010 | slr0500 | slr1181 | sll1579 | slr1090 | sll0145 | slr0823 |
| slr0513 | slr1844 | slr0536 | smr0010 | slr1181 | slr1560 | sll0902 | sll1579 | sll0708 | slr0823 |
| sll0459 | slr0513 | slr1874 | smr0010 | sll1988 | slr1181 | sll1579 | slr0661 | slr0679 | slr0823 |
| sll0865 | slr0513 | sll1776 | smr0010 | slr1181 | slr1289 | sll1579 | slr0526 | slr0722 | slr0823 |
| slr0513 | slr0733 | sll0848 | smr0010 | sll1556 | slr1181 | sll1249 | sll1579 | slr0072 | slr0823 |
| sll1459 | slr0513 | sll0897 | smr0010 | slr1181 | ssl3441 | sll0892 | sll1579 | sll1547 | slr0823 |
| sll0905 | slr0513 | sll1933 | smr0010 | slr0744 | slr1181 | sll0660 | sll1579 | sll1234 | slr0823 |
| sll0247 | sll0402 | slr0965 | smr0010 | slr0974 | slr1181 | sll1579 | slr1779 | sll0616 | slr0823 |
| sll0247 | sll0728 | slr1463 | smr0010 | slr1181 | slr1622 | sll1579 | slr0394 | slr0823 | slr2073 |
| sll0247 | sll0336 | sll1098 | smr0010 | sll1196 | slr1181 | sll1579 | slr2047 | slr0823 | slr1639 |
| sll0247 | sll1299 | slr0434 | smr0010 | sll0745 | slr1181 | sll1579 | slr0741 | sll1108 | slr0823 |
| sll0247 | ssl2084 | sll1261 | smr0010 | sll1815 | slr1181 | sll1579 | slr1510 | sll0362 | slr0823 |
| sll0247 | sll2001 | sll1099 | smr0010 | sll1059 | slr1181 | sll1043 | sll1579 | slr0823 | slr0958 |
| sll0247 | sll1430 | slr0752 | smr0010 | slr1123 | slr1181 | sll1579 | slr0400 | slr0823 | slr1720 |
| sll0247 | sll0573 | slr0952 | smr0010 | sll1760 | slr1181 | sll1415 | sll1579 | sll0179 | slr0823 |
| sll0247 | slr1898 | slr1511 | smr0010 | sll0469 | slr1181 | sll1579 | sll1909 | sll0454 | slr0823 |
| sll0080 | sll0247 | sll1605 | smr0010 | slr1181 | slr1517 | sll0373 | sll1579 | sll1553 | slr0823 |
| sll0247 | slr1022 | sll0990 | smr0010 | sll0869 | slr1181 | sll1579 | slr2035 | slr0638 | slr0823 |
| sll0247 | sll1883 | sll1633 | smr0010 | slr1181 | slr1598 | sll1579 | slr2132 | slr0220 | slr0823 |
| sll0247 | slr1133 | slr0018 | smr0010 | sll0868 | slr1181 | sll1579 | slr0922 | slr0357 | slr0823 |
| sll0247 | slr0444 | sll0567 | smr0010 | slr0994 | slr1181 | sll1579 | slr0838 | sll1362 | slr0823 |
| sll0247 | slr2130 | slr0884 | smr0010 | sll0379 | slr1181 | sll1579 | sll1823 | slr0823 | slr1550 |
| sll0247 | sll1669 | sll1342 | smr0010 | sll1676 | slr1181 | sll1056 | sll1579 | sll1074 | slr0823 |
| sll0247 | slr0585 | slr1349 | smr0010 | sll0927 | slr1181 | sll1579 | slr0520 | slr0649 | slr0823 |
| sll0247 | slr2075 | sll0593 | smr0010 | sll0996 | slr1181 | sll0144 | sll1579 | sll0495 | slr0823 |
| sll0247 | slr2076 | sll0220 | smr0010 | sll0844 | slr1181 | sll0467 | sll1579 | sll1425 | slr0823 |
| sll0247 | sll0416 | sll0899 | smr0010 | sll1615 | slr1181 | sll1579 | slr0711 | sll0502 | slr0823 |
| sll0247 | slr0156 | slr1756 | smr0010 | sll0202 | slr1181 | sll0754 | sll1579 | slr0823 | slr1703 |
| sll0247 | slr1641 | sll1085 | smr0010 | slr0902 | slr1181 | sll0569 | sll1579 | sll0078 | slr0823 |
| sll0247 | slr0542 | sll1931 | smr0010 | sll1144 | slr1181 | sll1277 | sll1579 | slr0557 | slr0823 |
| sll0247 | sll0534 | sll0083 | smr0010 | slr0017 | slr1181 | sll1110 | sll1579 | slr0823 | slr1884 |
| sll0247 | slr0165 | slr1755 | smr0010 | slr1181 | slr1424 | sll1579 | sll1865 | slr0823 | slr1031 |
| sll0030 | sll0247 | sll0057 | smr0010 | slr1181 | slr1423 | sll1579 | slr1228 | slr0823 | slr1793 |
| sll0247 | slr0847 | sll0017 | smr0010 | sll2010 | slr1181 | sll1579 | slr0808 | slr0633 | slr0823 |
| sll0247 | slr0553 | sll1185 | smr0010 | slr0528 | slr1181 | sll1579 | slr0082 | slr0823 | slr1278 |
| sll0247 | slr0812 | slr0839 | smr0010 | slr1181 | slr1351 | sll1579 | slr0742 | slr0783 | slr0823 |
| sll0247 | slr1347 | sll1876 | smr0010 | sll0622 | slr1181 | sll0098 | sll1579 | sll1198 | slr0823 |
| sll0247 | slr1348 | sll0900 | smr0010 | sll0631 | slr1181 | sll1579 | slr1646 | sll0204 | slr0823 |
| sll0247 | slr1791 | slr0608 | smr0010 | slr0787 | slr1181 | sll1579 | slr1130 | sll1750 | slr0823 |
| sll0247 | sll0594 | slr0652 | smr0010 | sll1852 | slr1181 | sll1579 | slr0080 | sll0420 | slr0823 |
| sll0247 | slr0550 | slr0084 | smr0010 | slr1090 | slr1181 | sll1579 | slr0551 | slr0823 | slr1256 |
| sll0247 | sll1058 | sll1893 | smr0010 | sll0902 | slr1181 | sll0145 | sll1579 | sll1639 | slr0823 |
| sll0247 | slr1665 | slr0500 | smr0010 | slr0661 | slr1181 | sll0708 | sll1579 | slr0823 | slr1899 |

|         |         |         |         |         |         |         |         |         |         |
|---------|---------|---------|---------|---------|---------|---------|---------|---------|---------|
| sll0247 | slr0536 | slr1560 | smr0010 | slr0526 | slr1181 | sll1579 | slr0679 | sll0643 | slr0823 |
| sll0247 | slr1874 | sll1988 | smr0010 | sll1249 | slr1181 | sll1579 | slr0722 | slr0823 | slr1844 |
| sll0247 | sll1776 | slr1289 | smr0010 | sll0892 | slr1181 | sll1579 | slr0072 | sll0459 | slr0823 |
| sll0247 | sll0848 | sll1556 | smr0010 | sll0660 | slr1181 | sll1547 | sll1579 | sll0865 | slr0823 |
| sll0247 | sll0897 | smr0010 | ssl3441 | slr1181 | slr1779 | sll1234 | sll1579 | slr0733 | slr0823 |
| sll0247 | sll1933 | slr0744 | smr0010 | slr0394 | slr1181 | sll0616 | sll1579 | sll1459 | slr0823 |
| sll0247 | slr0965 | slr0974 | smr0010 | slr1181 | slr2047 | sll1579 | slr2073 | sll0905 | slr0823 |
| sll0247 | slr1463 | slr1622 | smr0010 | slr0741 | slr1181 | sll1579 | slr1639 | sll0226 | sll0402 |
| sll0247 | sll1098 | sll1196 | smr0010 | slr1181 | slr1510 | sll1108 | sll1579 | sll0226 | sll0728 |
| sll0247 | slr0434 | sll0745 | smr0010 | sll1043 | slr1181 | sll0362 | sll1579 | sll0226 | sll0336 |
| sll0247 | sll1261 | sll1815 | smr0010 | slr0400 | slr1181 | sll1579 | slr0958 | sll0226 | sll1299 |
| sll0247 | sll1099 | sll1059 | smr0010 | sll1415 | slr1181 | sll1579 | slr1720 | sll0226 | ssl2084 |
| sll0247 | slr0752 | slr1123 | smr0010 | sll1909 | slr1181 | sll0179 | sll1579 | sll0226 | sll2001 |
| sll0247 | slr0952 | sll1760 | smr0010 | sll0373 | slr1181 | sll0454 | sll1579 | sll0226 | sll1430 |
| sll0247 | slr1511 | sll0469 | smr0010 | slr1181 | slr2035 | sll1553 | sll1579 | sll0226 | sll0573 |
| sll0247 | sll1605 | slr1517 | smr0010 | slr1181 | slr2132 | sll1579 | slr0638 | sll0226 | slr1898 |
| sll0247 | sll0990 | sll0869 | smr0010 | slr0922 | slr1181 | sll1579 | slr0220 | sll0080 | sll0226 |
| sll0247 | sll1633 | slr1598 | smr0010 | slr0838 | slr1181 | sll1579 | slr0357 | sll0226 | slr1022 |
| sll0247 | slr0018 | sll0868 | smr0010 | sll1823 | slr1181 | sll1362 | sll1579 | sll0226 | sll1883 |
| sll0247 | sll0567 | slr0994 | smr0010 | sll1056 | slr1181 | sll1579 | slr1550 | sll0226 | slr1133 |
| sll0247 | slr0884 | sll0379 | smr0010 | slr0520 | slr1181 | sll1074 | sll1579 | sll0226 | slr0444 |
| sll0247 | sll1342 | sll1676 | smr0010 | sll0144 | slr1181 | sll1579 | slr0649 | sll0226 | slr2130 |
| sll0247 | slr1349 | sll0927 | smr0010 | sll0467 | slr1181 | sll0495 | sll1579 | sll0226 | sll1669 |
| sll0247 | sll0593 | sll0996 | smr0010 | slr0711 | slr1181 | sll1425 | sll1579 | sll0226 | slr0585 |
| sll0220 | sll0247 | sll0844 | smr0010 | sll0754 | slr1181 | sll0502 | sll1579 | sll0226 | slr2075 |
| sll0247 | sll0899 | sll1615 | smr0010 | sll0569 | slr1181 | sll1579 | slr1703 | sll0226 | slr2076 |
| sll0247 | slr1756 | sll0202 | smr0010 | sll1277 | slr1181 | sll0078 | sll1579 | sll0226 | sll0416 |
| sll0247 | sll1085 | slr0902 | smr0010 | sll1110 | slr1181 | sll1579 | slr0557 | sll0226 | slr0156 |
| sll0247 | sll1931 | sll1144 | smr0010 | sll1865 | slr1181 | sll1579 | slr1884 | sll0226 | slr1641 |
| sll0083 | sll0247 | slr0017 | smr0010 | slr1181 | slr1228 | sll1579 | slr1031 | sll0226 | slr0542 |
| sll0247 | slr1755 | slr1424 | smr0010 | slr0808 | slr1181 | sll1579 | slr1793 | sll0226 | sll0534 |
| sll0057 | sll0247 | slr1423 | smr0010 | slr0082 | slr1181 | sll1579 | slr0633 | sll0226 | slr0165 |
| sll0017 | sll0247 | sll2010 | smr0010 | slr0742 | slr1181 | sll1579 | slr1278 | sll0030 | sll0226 |
| sll0247 | sll1185 | slr0528 | smr0010 | sll0098 | slr1181 | sll1579 | slr0783 | sll0226 | slr0847 |
| sll0247 | slr0839 | slr1351 | smr0010 | slr1181 | slr1646 | sll1198 | sll1579 | sll0226 | slr0553 |
| sll0247 | sll1876 | sll0622 | smr0010 | slr1130 | slr1181 | sll0204 | sll1579 | sll0226 | slr0812 |
| sll0247 | sll0900 | sll0631 | smr0010 | slr0080 | slr1181 | sll1579 | sll1750 | sll0226 | slr1347 |
| sll0247 | slr0608 | slr0787 | smr0010 | slr0551 | slr1181 | sll0420 | sll1579 | sll0226 | slr1348 |
| sll0247 | slr0652 | sll1852 | smr0010 | sll0145 | slr1181 | sll1579 | slr1256 | sll0226 | slr1791 |
| sll0247 | slr0084 | slr1090 | smr0010 | sll0708 | slr1181 | sll1579 | sll1639 | sll0226 | sll0594 |
| sll0247 | sll1893 | sll0902 | smr0010 | slr0679 | slr1181 | sll1579 | slr1899 | sll0226 | slr0550 |
| sll0247 | slr0500 | slr0661 | smr0010 | slr0722 | slr1181 | sll0643 | sll1579 | sll0226 | sll1058 |
| sll0247 | slr1560 | slr0526 | smr0010 | slr0072 | slr1181 | sll1579 | slr1844 | sll0226 | slr1665 |
| sll0247 | sll1988 | sll1249 | smr0010 | sll1547 | slr1181 | sll0459 | sll1579 | sll0226 | slr0536 |
| sll0247 | slr1289 | sll0892 | smr0010 | sll1234 | slr1181 | sll0865 | sll1579 | sll0226 | slr1874 |
| sll0247 | sll1556 | sll0660 | smr0010 | sll0616 | slr1181 | sll1579 | slr0733 | sll0226 | sll1776 |
| sll0247 | ssl3441 | slr1779 | smr0010 | slr1181 | slr2073 | sll1459 | sll1579 | sll0226 | sll0848 |
| sll0247 | slr0744 | slr0394 | smr0010 | slr1181 | slr1639 | sll0905 | sll1579 | sll0226 | sll0897 |
| sll0247 | slr0974 | slr2047 | smr0010 | sll1108 | slr1181 | sll0402 | ssl3093 | sll0226 | sll1933 |
| sll0247 | slr1622 | slr0741 | smr0010 | sll0362 | slr1181 | sll0728 | ssl3093 | sll0226 | slr0965 |
| sll0247 | sll1196 | slr1510 | smr0010 | slr0958 | slr1181 | sll0336 | ssl3093 | sll0226 | slr1463 |



|         |         |         |         |         |         |         |         |         |         |
|---------|---------|---------|---------|---------|---------|---------|---------|---------|---------|
| slI0247 | slI0745 | slI1043 | smr0010 | slr1181 | slr1720 | slI1299 | ssl3093 | slI0226 | slI1098 |
| slI0247 | slI1815 | slr0400 | smr0010 | slI0179 | slr1181 | ssl2084 | ssl3093 | slI0226 | slr0434 |
| slI0247 | slI1059 | slI1415 | smr0010 | slI0454 | slr1181 | slI2001 | ssl3093 | slI0226 | slI1261 |
| slI0247 | slr1123 | slI1909 | smr0010 | slI1553 | slr1181 | slI1430 | ssl3093 | slI0226 | slI1099 |
| slI0247 | slI1760 | slI0373 | smr0010 | slr0638 | slr1181 | slI0573 | ssl3093 | slI0226 | slr0752 |
| slI0247 | slI0469 | slr2035 | smr0010 | slr0220 | slr1181 | slr1898 | ssl3093 | slI0226 | slr0952 |
| slI0247 | slr1517 | slr2132 | smr0010 | slr0357 | slr1181 | slI0080 | ssl3093 | slI0226 | slr1511 |
| slI0247 | slI0869 | slr0922 | smr0010 | slI1362 | slr1181 | slr1022 | ssl3093 | slI0226 | slI1605 |
| slI0247 | slr1598 | slr0838 | smr0010 | slr1181 | slr1550 | slI1883 | ssl3093 | slI0226 | slI0990 |
| slI0247 | slI0868 | slI1823 | smr0010 | slI1074 | slr1181 | slr1133 | ssl3093 | slI0226 | slI1633 |
| slI0247 | slr0994 | slI1056 | smr0010 | slr0649 | slr1181 | slr0444 | ssl3093 | slI0226 | slr0018 |
| slI0247 | slI0379 | slr0520 | smr0010 | slI0495 | slr1181 | slr2130 | ssl3093 | slI0226 | slI0567 |
| slI0247 | slI1676 | slI0144 | smr0010 | slI1425 | slr1181 | slI1669 | ssl3093 | slI0226 | slr0884 |
| slI0247 | slI0927 | slI0467 | smr0010 | slI0502 | slr1181 | slr0585 | ssl3093 | slI0226 | slI1342 |
| slI0247 | slI0996 | slr0711 | smr0010 | slr1181 | slr1703 | slr2075 | ssl3093 | slI0226 | slr1349 |
| slI0247 | slI0844 | slI0754 | smr0010 | slI0078 | slr1181 | slr2076 | ssl3093 | slI0226 | slI0593 |
| slI0247 | slI1615 | slI0569 | smr0010 | slr0557 | slr1181 | slI0416 | ssl3093 | slI0220 | slI0226 |
| slI0202 | slI0247 | slI1277 | smr0010 | slr1181 | slr1884 | slr0156 | ssl3093 | slI0226 | slI0899 |
| slI0247 | slr0902 | slI1110 | smr0010 | slr1031 | slr1181 | slr1641 | ssl3093 | slI0226 | slr1756 |
| slI0247 | slI1144 | slI1865 | smr0010 | slr1181 | slr1793 | slr0542 | ssl3093 | slI0226 | slI1085 |
| slI0247 | slr0017 | slr1228 | smr0010 | slr0633 | slr1181 | slI0534 | ssl3093 | slI0226 | slI1931 |
| slI0247 | slr1424 | slr0808 | smr0010 | slr1181 | slr1278 | slr0165 | ssl3093 | slI0083 | slI0226 |
| slI0247 | slr1423 | slr0082 | smr0010 | slr0783 | slr1181 | slI0030 | ssl3093 | slI0226 | slr1755 |
| slI0247 | slI2010 | slr0742 | smr0010 | slI1198 | slr1181 | slr0847 | ssl3093 | slI0057 | slI0226 |
| slI0247 | slr0528 | slI0098 | smr0010 | slI0204 | slr1181 | slr0553 | ssl3093 | slI0017 | slI0226 |
| slI0247 | slr1351 | slr1646 | smr0010 | slI1750 | slr1181 | slr0812 | ssl3093 | slI0226 | slI1185 |
| slI0247 | slI0622 | slr1130 | smr0010 | slI0420 | slr1181 | slr1347 | ssl3093 | slI0226 | slr0839 |
| slI0247 | slI0631 | slr0080 | smr0010 | slr1181 | slr1256 | slr1348 | ssl3093 | slI0226 | slI1876 |
| slI0247 | slr0787 | slr0551 | smr0010 | slI1639 | slr1181 | slr1791 | ssl3093 | slI0226 | slI0900 |
| slI0247 | slI1852 | slI0145 | smr0010 | slr1181 | slr1899 | slI0594 | ssl3093 | slI0226 | slr0608 |
| slI0247 | slr1090 | slI0708 | smr0010 | slI0643 | slr1181 | slr0550 | ssl3093 | slI0226 | slr0652 |
| slI0247 | slI0902 | slr0679 | smr0010 | slr1181 | slr1844 | slI1058 | ssl3093 | slI0226 | slr0084 |
| slI0247 | slr0661 | slr0722 | smr0010 | slI0459 | slr1181 | slr1665 | ssl3093 | slI0226 | slI1893 |
| slI0247 | slr0526 | slr0072 | smr0010 | slI0865 | slr1181 | slr0536 | ssl3093 | slI0226 | slr0500 |
| slI0247 | slI1249 | slI1547 | smr0010 | slr0733 | slr1181 | slr1874 | ssl3093 | slI0226 | slr1560 |
| slI0247 | slI0892 | slI1234 | smr0010 | slI1459 | slr1181 | slI1776 | ssl3093 | slI0226 | slI1988 |
| slI0247 | slI0660 | slI0616 | smr0010 | slI0905 | slr1181 | slI0848 | ssl3093 | slI0226 | slr1289 |
| slI0247 | slr1779 | slr2073 | smr0010 | slI0402 | slr0906 | slI0897 | ssl3093 | slI0226 | slI1556 |
| slI0247 | slr0394 | slr1639 | smr0010 | slI0728 | slr0906 | slI1933 | ssl3093 | slI0226 | ssl3441 |
| slI0247 | slr2047 | slI1108 | smr0010 | slI0336 | slr0906 | slr0965 | ssl3093 | slI0226 | slr0744 |
| slI0247 | slr0741 | slI0362 | smr0010 | slI1299 | slr0906 | slr1463 | ssl3093 | slI0226 | slr0974 |
| slI0247 | slr1510 | slr0958 | smr0010 | slr0906 | ssl2084 | slI1098 | ssl3093 | slI0226 | slr1622 |
| slI0247 | slI1043 | slr1720 | smr0010 | slI2001 | slr0906 | slr0434 | ssl3093 | slI0226 | slI1196 |
| slI0247 | slr0400 | slI0179 | smr0010 | slI1430 | slr0906 | slI1261 | ssl3093 | slI0226 | slI0745 |
| slI0247 | slI1415 | slI0454 | smr0010 | slI0573 | slr0906 | slI1099 | ssl3093 | slI0226 | slI1815 |
| slI0247 | slI1909 | slI1553 | smr0010 | slr0906 | slr1898 | slr0752 | ssl3093 | slI0226 | slI1059 |
| slI0247 | slI0373 | slr0638 | smr0010 | slI0080 | slr0906 | slr0952 | ssl3093 | slI0226 | slr1123 |
| slI0247 | slr2035 | slr0220 | smr0010 | slr0906 | slr1022 | slr1511 | ssl3093 | slI0226 | slI1760 |
| slI0247 | slr2132 | slr0357 | smr0010 | slI1883 | slr0906 | slI1605 | ssl3093 | slI0226 | slI0469 |
| slI0247 | slr0922 | slI1362 | smr0010 | slr0906 | slr1133 | slI0990 | ssl3093 | slI0226 | slr1517 |
| slI0247 | slr0838 | slr1550 | smr0010 | slr0444 | slr0906 | slI1633 | ssl3093 | slI0226 | slI0869 |

|         |         |         |         |         |         |         |         |         |         |
|---------|---------|---------|---------|---------|---------|---------|---------|---------|---------|
| slI0247 | slI1823 | slI1074 | smr0010 | slr0906 | slr2130 | slr0018 | ssl3093 | slI0226 | slr1598 |
| slI0247 | slI1056 | slr0649 | smr0010 | slI1669 | slr0906 | slI0567 | ssl3093 | slI0226 | slI0868 |
| slI0247 | slr0520 | slI0495 | smr0010 | slr0585 | slr0906 | slr0884 | ssl3093 | slI0226 | slr0994 |
| slI0144 | slI0247 | slI1425 | smr0010 | slr0906 | slr2075 | slI1342 | ssl3093 | slI0226 | slI0379 |
| slI0247 | slI0467 | slI0502 | smr0010 | slr0906 | slr2076 | slr1349 | ssl3093 | slI0226 | slI1676 |
| slI0247 | slr0711 | slr1703 | smr0010 | slI0416 | slr0906 | slI0593 | ssl3093 | slI0226 | slI0927 |
| slI0247 | slI0754 | slI0078 | smr0010 | slr0156 | slr0906 | slI0220 | ssl3093 | slI0226 | slI0996 |
| slI0247 | slI0569 | slr0557 | smr0010 | slr0906 | slr1641 | slI0899 | ssl3093 | slI0226 | slI0844 |
| slI0247 | slI1277 | slr1884 | smr0010 | slr0542 | slr0906 | slr1756 | ssl3093 | slI0226 | slI1615 |
| slI0247 | slI1110 | slr1031 | smr0010 | slI0534 | slr0906 | slI1085 | ssl3093 | slI0202 | slI0226 |
| slI0247 | slI1865 | slr1793 | smr0010 | slr0165 | slr0906 | slI1931 | ssl3093 | slI0226 | slr0902 |
| slI0247 | slr1228 | slr0633 | smr0010 | slI0030 | slr0906 | slI0083 | ssl3093 | slI0226 | slI1144 |
| slI0247 | slr0808 | slr1278 | smr0010 | slr0847 | slr0906 | slr1755 | ssl3093 | slI0226 | slr0017 |
| slI0247 | slr0082 | slr0783 | smr0010 | slr0553 | slr0906 | slI0057 | ssl3093 | slI0226 | slr1424 |
| slI0247 | slr0742 | slI1198 | smr0010 | slr0812 | slr0906 | slI0017 | ssl3093 | slI0226 | slr1423 |
| slI0098 | slI0247 | slI0204 | smr0010 | slr0906 | slr1347 | slI1185 | ssl3093 | slI0226 | slI2010 |
| slI0247 | slr1646 | slI1750 | smr0010 | slr0906 | slr1348 | slr0839 | ssl3093 | slI0226 | slr0528 |
| slI0247 | slr1130 | slI0420 | smr0010 | slr0906 | slr1791 | slI1876 | ssl3093 | slI0226 | slr1351 |
| slI0247 | slr0080 | slr1256 | smr0010 | slI0594 | slr0906 | slI0900 | ssl3093 | slI0226 | slI0622 |
| slI0247 | slr0551 | slI1639 | smr0010 | slr0550 | slr0906 | slr0608 | ssl3093 | slI0226 | slI0631 |
| slI0145 | slI0247 | slr1899 | smr0010 | slI1058 | slr0906 | slr0652 | ssl3093 | slI0226 | slr0787 |
| slI0247 | slI0708 | slI0643 | smr0010 | slr0906 | slr1665 | slr0084 | ssl3093 | slI0226 | slI1852 |
| slI0247 | slr0679 | slr1844 | smr0010 | slr0536 | slr0906 | slI1893 | ssl3093 | slI0226 | slr1090 |
| slI0247 | slr0722 | slI0459 | smr0010 | slr0906 | slr1874 | slr0500 | ssl3093 | slI0226 | slI0902 |
| slI0247 | slr0072 | slI0865 | smr0010 | slI1776 | slr0906 | slr1560 | ssl3093 | slI0226 | slr0661 |
| slI0247 | slI1547 | slr0733 | smr0010 | slI0848 | slr0906 | slI1988 | ssl3093 | slI0226 | slr0526 |
| slI0247 | slI1234 | slI1459 | smr0010 | slI0897 | slr0906 | slr1289 | ssl3093 | slI0226 | slI1249 |
| slI0247 | slI0616 | slI0905 | smr0010 | slI1933 | slr0906 | slI1556 | ssl3093 | slI0226 | slI0892 |
| slI0247 | slr2073 | slI0402 | smr0003 | slr0906 | slr0965 | ssl3093 | ssl3441 | slI0226 | slI0660 |
| slI0247 | slr1639 | slI0728 | smr0003 | slr0906 | slr1463 | slr0744 | ssl3093 | slI0226 | slr1779 |
| slI0247 | slI1108 | slI0336 | smr0003 | slI1098 | slr0906 | slr0974 | ssl3093 | slI0226 | slr0394 |
| slI0247 | slI0362 | slI1299 | smr0003 | slr0434 | slr0906 | slr1622 | ssl3093 | slI0226 | slr2047 |
| slI0247 | slr0958 | smr0003 | ssl2084 | slI1261 | slr0906 | slI1196 | ssl3093 | slI0226 | slr0741 |
| slI0247 | slr1720 | slI2001 | smr0003 | slI1099 | slr0906 | slI0745 | ssl3093 | slI0226 | slr1510 |
| slI0179 | slI0247 | slI1430 | smr0003 | slr0752 | slr0906 | slI1815 | ssl3093 | slI0226 | slI1043 |
| slI0247 | slI0454 | slI0573 | smr0003 | slr0906 | slr0952 | slI1059 | ssl3093 | slI0226 | slr0400 |
| slI0247 | slI1553 | slr1898 | smr0003 | slr0906 | slr1511 | slr1123 | ssl3093 | slI0226 | slI1415 |
| slI0247 | slr0638 | slI0080 | smr0003 | slI1605 | slr0906 | slI1760 | ssl3093 | slI0226 | slI1909 |
| slI0247 | slr0220 | slr1022 | smr0003 | slI0990 | slr0906 | slI0469 | ssl3093 | slI0226 | slI0373 |
| slI0247 | slr0357 | slI1883 | smr0003 | slI1633 | slr0906 | slr1517 | ssl3093 | slI0226 | slr2035 |
| slI0247 | slI1362 | slr1133 | smr0003 | slr0018 | slr0906 | slI0869 | ssl3093 | slI0226 | slr2132 |
| slI0247 | slr1550 | slr0444 | smr0003 | slI0567 | slr0906 | slr1598 | ssl3093 | slI0226 | slr0922 |
| slI0247 | slI1074 | slr2130 | smr0003 | slr0884 | slr0906 | slI0868 | ssl3093 | slI0226 | slr0838 |
| slI0247 | slr0649 | slI1669 | smr0003 | slI1342 | slr0906 | slr0994 | ssl3093 | slI0226 | slI1823 |
| slI0247 | slI0495 | slr0585 | smr0003 | slr0906 | slr1349 | slI0379 | ssl3093 | slI0226 | slI1056 |
| slI0247 | slI1425 | slr2075 | smr0003 | slI0593 | slr0906 | slI1676 | ssl3093 | slI0226 | slr0520 |
| slI0247 | slI0502 | slr2076 | smr0003 | slI0220 | slr0906 | slI0927 | ssl3093 | slI0144 | slI0226 |
| slI0247 | slr1703 | slI0416 | smr0003 | slI0899 | slr0906 | slI0996 | ssl3093 | slI0226 | slI0467 |
| slI0078 | slI0247 | slr0156 | smr0003 | slr0906 | slr1756 | slI0844 | ssl3093 | slI0226 | slr0711 |
| slI0247 | slr0557 | slr1641 | smr0003 | slI1085 | slr0906 | slI1615 | ssl3093 | slI0226 | slI0754 |
| slI0247 | slr1884 | slr0542 | smr0003 | slI1931 | slr0906 | slI0202 | ssl3093 | slI0226 | slI0569 |

|         |         |         |         |         |         |         |         |         |         |
|---------|---------|---------|---------|---------|---------|---------|---------|---------|---------|
| slI0247 | slr1031 | slI0534 | smr0003 | slI0083 | slr0906 | slr0902 | ssl3093 | slI0226 | slI1277 |
| slI0247 | slr1793 | slr0165 | smr0003 | slr0906 | slr1755 | slI1144 | ssl3093 | slI0226 | slI1110 |
| slI0247 | slr0633 | slI0030 | smr0003 | slI0057 | slr0906 | slr0017 | ssl3093 | slI0226 | slI1865 |
| slI0247 | slr1278 | slr0847 | smr0003 | slI0017 | slr0906 | slr1424 | ssl3093 | slI0226 | slr1228 |
| slI0247 | slr0783 | slr0553 | smr0003 | slI1185 | slr0906 | slr1423 | ssl3093 | slI0226 | slr0808 |
| slI0247 | slI1198 | slr0812 | smr0003 | slr0839 | slr0906 | slI2010 | ssl3093 | slI0226 | slr0082 |
| slI0204 | slI0247 | slr1347 | smr0003 | slI1876 | slr0906 | slr0528 | ssl3093 | slI0226 | slr0742 |
| slI0247 | slI1750 | slr1348 | smr0003 | slI0900 | slr0906 | slr1351 | ssl3093 | slI0098 | slI0226 |
| slI0247 | slI0420 | slr1791 | smr0003 | slr0608 | slr0906 | slI0622 | ssl3093 | slI0226 | slr1646 |
| slI0247 | slr1256 | slI0594 | smr0003 | slr0652 | slr0906 | slI0631 | ssl3093 | slI0226 | slr1130 |
| slI0247 | slI1639 | slr0550 | smr0003 | slr0084 | slr0906 | slr0787 | ssl3093 | slI0226 | slr0080 |
| slI0247 | slr1899 | slI1058 | smr0003 | slI1893 | slr0906 | slI1852 | ssl3093 | slI0226 | slr0551 |
| slI0247 | slI0643 | slr1665 | smr0003 | slr0500 | slr0906 | slr1090 | ssl3093 | slI0145 | slI0226 |
| slI0247 | slr1844 | slr0536 | smr0003 | slr0906 | slr1560 | slI0902 | ssl3093 | slI0226 | slI0708 |
| slI0247 | slI0459 | slr1874 | smr0003 | slI1988 | slr0906 | slr0661 | ssl3093 | slI0226 | slr0679 |
| slI0247 | slI0865 | slI1776 | smr0003 | slr0906 | slr1289 | slr0526 | ssl3093 | slI0226 | slr0722 |
| slI0247 | slr0733 | slI0848 | smr0003 | slI1556 | slr0906 | slI1249 | ssl3093 | slI0226 | slr0072 |
| slI0247 | slI1459 | slI0897 | smr0003 | slr0906 | ssl3441 | slI0892 | ssl3093 | slI0226 | slI1547 |
| slI0247 | slI0905 | slI1933 | smr0003 | slr0744 | slr0906 | slI0660 | ssl3093 | slI0226 | slI1234 |
| slI0402 | slr0261 | slr0965 | smr0003 | slr0906 | slr0974 | slr1779 | ssl3093 | slI0226 | slI0616 |
| slI0728 | slr0261 | slr1463 | smr0003 | slr0906 | slr1622 | slr0394 | ssl3093 | slI0226 | slr2073 |
| slI0336 | slr0261 | slI1098 | smr0003 | slI1196 | slr0906 | slr2047 | ssl3093 | slI0226 | slr1639 |
| slI1299 | slr0261 | slr0434 | smr0003 | slI0745 | slr0906 | slr0741 | ssl3093 | slI0226 | slI1108 |
| slr0261 | ssl2084 | slI1261 | smr0003 | slI1815 | slr0906 | slr1510 | ssl3093 | slI0226 | slI0362 |
| slI2001 | slr0261 | slI1099 | smr0003 | slI1059 | slr0906 | slI1043 | ssl3093 | slI0226 | slr0958 |
| slI1430 | slr0261 | slr0752 | smr0003 | slr0906 | slr1123 | slr0400 | ssl3093 | slI0226 | slr1720 |
| slI0573 | slr0261 | slr0952 | smr0003 | slI1760 | slr0906 | slI1415 | ssl3093 | slI0179 | slI0226 |
| slr0261 | slr1898 | slr1511 | smr0003 | slI0469 | slr0906 | slI1909 | ssl3093 | slI0226 | slI0454 |
| slI0080 | slr0261 | slI1605 | smr0003 | slr0906 | slr1517 | slI0373 | ssl3093 | slI0226 | slI1553 |
| slr0261 | slr1022 | slI0990 | smr0003 | slI0869 | slr0906 | slr2035 | ssl3093 | slI0226 | slr0638 |
| slI1883 | slr0261 | slI1633 | smr0003 | slr0906 | slr1598 | slr2132 | ssl3093 | slI0226 | slr0220 |
| slr0261 | slr1133 | slr0018 | smr0003 | slI0868 | slr0906 | slr0922 | ssl3093 | slI0226 | slr0357 |
| slr0261 | slr0444 | slI0567 | smr0003 | slr0906 | slr0994 | slr0838 | ssl3093 | slI0226 | slI1362 |
| slr0261 | slr2130 | slr0884 | smr0003 | slI0379 | slr0906 | slI1823 | ssl3093 | slI0226 | slr1550 |
| slI1669 | slr0261 | slI1342 | smr0003 | slI1676 | slr0906 | slI1056 | ssl3093 | slI0226 | slI1074 |
| slr0261 | slr0585 | slr1349 | smr0003 | slI0927 | slr0906 | slr0520 | ssl3093 | slI0226 | slr0649 |
| slr0261 | slr2075 | slI0593 | smr0003 | slI0996 | slr0906 | slI0144 | ssl3093 | slI0226 | slI0495 |
| slr0261 | slr2076 | slI0220 | smr0003 | slI0844 | slr0906 | slI0467 | ssl3093 | slI0226 | slI1425 |
| slI0416 | slr0261 | slI0899 | smr0003 | slI1615 | slr0906 | slr0711 | ssl3093 | slI0226 | slI0502 |
| slr0156 | slr0261 | slr1756 | smr0003 | slI0202 | slr0906 | slI0754 | ssl3093 | slI0226 | slr1703 |
| slr0261 | slr1641 | slI1085 | smr0003 | slr0902 | slr0906 | slI0569 | ssl3093 | slI0078 | slI0226 |
| slr0261 | slr0542 | slI1931 | smr0003 | slI1144 | slr0906 | slI1277 | ssl3093 | slI0226 | slr0557 |
| slI0534 | slr0261 | slI0083 | smr0003 | slr0017 | slr0906 | slI1110 | ssl3093 | slI0226 | slr1884 |
| slr0165 | slr0261 | slr1755 | smr0003 | slr0906 | slr1424 | slI1865 | ssl3093 | slI0226 | slr1031 |
| slI0030 | slr0261 | slI0057 | smr0003 | slr0906 | slr1423 | slr1228 | ssl3093 | slI0226 | slr1793 |
| slr0261 | slr0847 | slI0017 | smr0003 | slI2010 | slr0906 | slr0808 | ssl3093 | slI0226 | slr0633 |
| slr0261 | slr0553 | slI1185 | smr0003 | slr0528 | slr0906 | slr0082 | ssl3093 | slI0226 | slr1278 |
| slr0261 | slr0812 | slr0839 | smr0003 | slr0906 | slr1351 | slr0742 | ssl3093 | slI0226 | slr0783 |
| slr0261 | slr1347 | slI1876 | smr0003 | slI0622 | slr0906 | slI0098 | ssl3093 | slI0226 | slI1198 |
| slr0261 | slr1348 | slI0900 | smr0003 | slI0631 | slr0906 | slr1646 | ssl3093 | slI0204 | slI0226 |
| slr0261 | slr1791 | slr0608 | smr0003 | slr0787 | slr0906 | slr1130 | ssl3093 | slI0226 | slI1750 |

|         |         |         |         |         |         |         |         |         |         |
|---------|---------|---------|---------|---------|---------|---------|---------|---------|---------|
| slr0594 | slr0261 | slr0652 | smr0003 | slr1852 | slr0906 | slr0080 | ssl3093 | slr0226 | slr0420 |
| slr0261 | slr0550 | slr0084 | smr0003 | slr0906 | slr1090 | slr0551 | ssl3093 | slr0226 | slr1256 |
| slr1058 | slr0261 | slr1893 | smr0003 | slr0902 | slr0906 | slr0145 | ssl3093 | slr0226 | slr1639 |
| slr0261 | slr1665 | slr0500 | smr0003 | slr0661 | slr0906 | slr0708 | ssl3093 | slr0226 | slr1899 |
| slr0261 | slr0536 | slr1560 | smr0003 | slr0526 | slr0906 | slr0679 | ssl3093 | slr0226 | slr0643 |
| slr0261 | slr1874 | slr1988 | smr0003 | slr1249 | slr0906 | slr0722 | ssl3093 | slr0226 | slr1844 |
| slr1776 | slr0261 | slr1289 | smr0003 | slr0892 | slr0906 | slr0072 | ssl3093 | slr0226 | slr0459 |
| slr0848 | slr0261 | slr1556 | smr0003 | slr0660 | slr0906 | slr1547 | ssl3093 | slr0226 | slr0865 |
| slr0897 | slr0261 | smr0003 | ssl3441 | slr0906 | slr1779 | slr1234 | ssl3093 | slr0226 | slr0733 |
| slr1933 | slr0261 | slr0744 | smr0003 | slr0394 | slr0906 | slr0616 | ssl3093 | slr0226 | slr1459 |
| slr0261 | slr0965 | slr0974 | smr0003 | slr0906 | slr2047 | slr2073 | ssl3093 | slr0226 | slr0905 |
| slr0261 | slr1463 | slr1622 | smr0003 | slr0741 | slr0906 | slr1639 | ssl3093 |         |         |

**Supplemental Table S3. Predicted high confident PPIs.**

| P1      | P2      | P1      | P2      | P1      | P2      | P1      | P2      |
|---------|---------|---------|---------|---------|---------|---------|---------|
| slI0455 | slI0456 | ndhK2   | slI8032 | slI1406 | slI1407 | slr0847 | slr0848 |
| slr0907 | slr0909 | slI1251 | ssl2471 | slr5021 | ssr5020 | slI0927 | slI0928 |
| slI7063 | slI7064 | slI0720 | slI1552 | slI1429 | ssl2789 | slr1249 | slr1250 |
| slI0742 | slI0743 | slI7043 | slI7044 | slI1159 | slI1160 | slr1042 | slr1043 |
| slr2081 | slr2082 | slI0898 | ssl1707 | slr1884 | ssr3189 | slI0771 | slI0772 |
| slI1002 | ssl1920 | slr1416 | slr1417 | slr1339 | slr1340 | slr0103 | slr0104 |
| slr1857 | slr1859 | slI1203 | slI1204 | slr0293 | slr0294 | slr1970 | ssr3341 |
| slr0311 | slr0312 | slI0789 | slI0790 | slI0328 | slI0329 | slr1248 | slr1249 |
| slI5014 | ssl5015 | slr0901 | slr0902 | slI0092 | ssl0172 | slr1457 | slr1459 |
| slr0945 | slr0946 | slI1297 | ssl2559 | slI5089 | slI5090 | slI1672 | slI1673 |
| slr0502 | slr0537 | slI0043 | slI0044 | slI1786 | slI1787 | slr0492 | slr0493 |
| slI1031 | slI1032 | slI1121 | slI1123 | slI0447 | slI0448 | slI1630 | slI1631 |
| slr0298 | slr0299 | slr0879 | slr0880 | slr5118 | slr5119 | slI0753 | ssl1417 |
| slr7025 | slr7026 | slI0896 | slI0897 | slr7080 | slr7081 | slr0179 | slr0180 |
| slr0326 | slr0327 | slI0401 | slI0402 | slI1250 | ssl2471 | slI1005 | slI1006 |
| slI0574 | slI0575 | slr0236 | slr0605 | slr1939 | slr1940 | slI0237 | slI0238 |
| slr1187 | slr1188 | slr1434 | ssr2067 | slr1318 | slr1319 | slI0238 | slI0240 |
| slr0947 | slr0948 | slI2006 | slI2007 | slr1659 | slr1660 | slr1181 | sml0001 |
| slI1009 | slI1009 | slr0517 | slr0518 | slr2122 | slr2123 | slI0517 | ssr1480 |
| slI0477 | slI0478 | slI1087 | slI1089 | slr0704 | smr0002 | slr2035 | ssr3452 |
| slI1703 | slI1704 | slr0252 | ssr0390 | slI1608 | slI1609 | slI1255 | slI1560 |
| slI1760 | slI1761 | slI0505 | slI0506 | slr1999 | ssr1765 | slr1470 | slr1471 |
| slI1580 | ssl3093 | slr7083 | ssr7084 | slI0667 | slI0668 | slI1495 | slI1496 |
| ssl5099 | ssl5100 | slr6049 | slr6050 | slI1306 | slI1307 | slr1779 | slr1780 |
| slr1626 | slr1627 | slI1452 | slI1453 | slI1654 | slI1655 | slr0488 | slr0489 |
| slI0928 | slI0930 | slr1188 | slr1189 | slr1678 | ssr2799 | slr1020 | ssr1698 |
| slI0480 | slI0481 | slr6006 | slr6007 | slr0072 | slr0848 | slr1419 | slr1420 |
| slI0936 | ssl1792 | slI1181 | slI1182 | slI8006 | ssl8005 | slI0608 | slI0609 |
| slr1545 | slr1546 | slI0587 | slI0588 | slI0431 | slI0651 | slI0288 | slI0289 |
| slr1109 | slr1110 | slI0910 | slI0911 | slI0173 | slI0174 | slI0481 | slI0482 |
| slr1657 | slr1658 | slr1384 | slr1385 | slr0108 | slr0109 | slr2034 | ssr3451 |
| slI1099 | slI1101 | slI1520 | slI1521 | slI5097 | ssl5098 | slI1340 | slI1341 |
| slr1940 | ssr3300 | slr0878 | slr0879 | slr1065 | slr1066 | slI0147 | slI0148 |
| slr0313 | slr0314 | slr1512 | slr1513 | slI1343 | slI1344 | slI1119 | slI1120 |
| slr1815 | slr1816 | slr1846 | ssr3122 | slr1383 | ssr2315 | slI0289 | ssl0546 |
| slr0889 | ssr1499 | slI0381 | slI0382 | slI0760 | slI0761 | slr5016 | slr5017 |
| slr0701 | slr0702 | slI1003 | slI1004 | slI5130 | ssl5129 | slI0372 | slI0373 |
| slI1160 | slI1161 | slI1512 | slI1513 | slr0364 | slr0366 | slr1788 | slr1789 |
| slI8001 | slI8002 | slr0962 | ssr1604 | slI8033 | slI8034 | slr1161 | slr1162 |
| slr1488 | slr1489 | slr2017 | slr2018 | slI0031 | slI0033 | slI0415 | slI0416 |
| slI1094 | ssl2153 | slI0148 | slI0149 | slr6102 | slr6103 | slI2005 | ssl3829 |
| slr1864 | slr1865 | slI1389 | ssl2717 | slr2102 | slr2103 | slr0096 | slr0498 |
| slr2123 | slr2124 | slI0495 | slI0496 | slI0327 | slI0328 | slI0842 | slI0843 |
| slI1163 | slI1164 | slI5032 | slI5033 | slr1176 | slr1177 | slI1461 | slI1462 |
| slr6004 | slr6005 | slr1993 | slr1994 | slI0297 | slI0298 | slI5006 | ssl5007 |
| slr1078 | slr1079 | ssr7035 | ssr7036 | slr0527 | slr0528 | slI1633 | ssl3177 |
| slI0797 | slI0798 | slr1031 | slr1032 | slI0265 | slI0266 | slI0994 | slI0995 |
| slI0191 | slI0416 | slr5010 | ssr5011 | slr1418 | slr1419 | slI0370 | slI0371 |

|         |         |         |         |         |         |         |         |
|---------|---------|---------|---------|---------|---------|---------|---------|
| sl11695 | sl11696 | slr0710 | slr0711 | sl10450 | sl10451 | sl11450 | sl11634 |
| sl11624 | sl11624 | slr1178 | slr1179 | sl10005 | sl10006 | sl10360 | sl10361 |
| slr5105 | ssr5106 | sl10827 | sl10828 | ssr3570 | ssr3571 | slr2111 | slr2112 |
| sl10577 | sl10578 | slr1570 | slr1571 | slr2001 | slr2002 | slr6100 | ssr6099 |
| sl10594 | sl10595 | slr0482 | slr0483 | slr1942 | ssr3304 | slr0230 | slr0231 |
| slr0817 | slr0818 | slr1023 | slr1024 | sl11069 | sl11070 | slr6043 | slr6044 |
| sl11820 | sl11821 | slr1610 | slr1611 | slr0795 | slr0796 | slr0989 | slr1951 |
| slr1742 | slr1743 | slr1214 | slr1215 | slr6033 | ssr6032 | slr0678 | slr0679 |
| slr0111 | slr0112 | slr0603 | slr0604 | sl11613 | sl11614 | slr0059 | slr0060 |
| sl10488 | sl10740 | sl10163 | sl10166 | slr1393 | slr1394 | sl10501 | sl10502 |
| slr0007 | slr0008 | slr1508 | slr1509 | slr1338 | slr1339 | sl11677 | sl11678 |
| slr1228 | slr1229 | slr1676 | slr1677 | sl10536 | sl10537 | sl10743 | sl10744 |
| slr0664 | slr0665 | slr2015 | slr2016 | slr0658 | slr0659 | sl11390 | ssl2717 |
| sl16036 | ssl6035 | sl10058 | sl10060 | sl10803 | sl10804 | slr0954 | ssr1600 |
| slr1022 | slr1023 | slr6015 | slr6016 | slr6084 | ssr6085 | slr0146 | slr0147 |
| sl11533 | sl11534 | slr1379 | slr1380 | sl10296 | ssl0564 | slr1575 | slr1576 |
| sl11509 | sl11510 | slr0162 | slr0163 | sl10065 | sl10066 | sl10854 | sl10855 |
| slr6037 | slr6038 | sgl0001 | ssl1045 | sl10665 | sl11710 | slr1471 | slr1472 |
| sl10925 | sl10926 | slr1728 | slr1729 | sl10658 | sl10659 | slr1945 | ssr3307 |
| slr0711 | slr0712 | sl11314 | sl11315 | slr1603 | slr1604 | slr1668 | ssr2786 |
| slr1734 | slr1735 | slr1535 | slr1536 | slr0161 | slr0162 | sl16052 | sl16053 |
| slr2096 | slr2097 | sl11028 | sl11029 | sl10728 | sl10729 | sl11636 | sl11900 |
| slr0480 | slr0482 | slr0263 | slr0264 | slr2083 | slr2084 | sl11231 | sl11232 |
| slr1930 | slr1931 | slr1227 | slr1228 | sl10737 | sl10738 | sl11086 | sl11087 |
| sl10012 | sl10666 | slr0089 | slr0090 | slr1722 | slr1723 | slr0236 | slr0744 |
| slr0473 | slr0474 | slr1518 | slr1519 | slr5018 | ssr5019 | sl15079 | sl15080 |
| sl10067 | sl10068 | sl11799 | sl11800 | slr1485 | slr1488 | slr1537 | slr1538 |
| slr1519 | slr1520 | slr2095 | slr2096 | slr1270 | slr1271 | slr1165 | slr1166 |
| sl10860 | sl11317 | sl11941 | slr0417 | slr0913 | slr0914 | sl11499 | sl11502 |
| slr1024 | slr1025 | slr7059 | slr7060 | sl15003 | sl15004 | slr0520 | slr0521 |
| sl10867 | sl10868 | slr1550 | slr1720 | slr1050 | ssr1736 | sl11092 | ssl2138 |
| slr1212 | slr1213 | slr0815 | slr0816 | sl10042 | sl10043 | sl11899 | ssl3580 |
| sl11536 | slr0821 | slr1559 | slr1560 | slr7096 | slr7097 | slr0985 | slr1610 |
| sl11228 | slr1044 | sl11900 | slr1348 | sl10615 | sl10616 | sl17077 | sl17078 |
| sl11004 | sl11005 | slr1106 | slr1107 | slr0435 | slr0436 | slr0586 | slr0587 |
| sl10981 | sl10982 | sl10071 | sl10072 | slr1799 | slr1800 | sl11937 | sl11938 |
| slr1851 | ssr3129 | sl11471 | slr2051 | slr0580 | slr0581 | sl11852 | sl11853 |
| sl18042 | sl18043 | slr0925 | slr1034 | sl15097 | ssl5096 | slr1919 | slr1920 |
| slr1063 | slr1225 | slr0049 | slr0440 | sl11383 | sl11384 | sl11882 | sl11883 |
| sl11304 | sl11785 | sl10317 | sl11474 | sl10984 | sl10985 | slr0271 | slr0272 |
| slr0210 | slr1044 | slr7082 | slr7083 | slr0477 | slr0479 | slr1874 | slr1875 |
| sl10225 | sl10226 | slr1415 | slr1416 | sl11322 | ssl2615 | slr0927 | slr0929 |
| sl11182 | sl11316 | sl10166 | sl10167 | sl10677 | sl11710 | sl11560 | sl11780 |
| sl18004 | ssl8003 | slr6101 | slr6102 | slr1560 | slr1562 | sl11388 | sl11389 |
| slr0388 | slr0769 | sgl0002 | sml0004 | slr2125 | slr2126 | slr7071 | ssr7072 |
| sl15104 | ssl5103 | sl15028 | ssl5027 | sl10436 | ssl0832 | sl10891 | sl10892 |
| sl10785 | sl10786 | slr0272 | slr0273 | slr1683 | slr1684 | sl11109 | sl11110 |
| sl11803 | sl11804 | sl10240 | sl10241 | sl11123 | sl11124 | sl11571 | sl11572 |
| ssr3409 | ssr3410 | sl10666 | sl10667 | slr0142 | slr0408 | sl11356 | sl11358 |
| sl11653 | sl11654 | slr5115 | slr5116 | slr2011 | ssr3410 | slr1044 | slr1147 |
| slr2010 | ssr3409 | sl10020 | sl10021 | slr0612 | slr0613 | slr0357 | slr0358 |

|         |         |         |         |         |         |          |         |
|---------|---------|---------|---------|---------|---------|----------|---------|
| slr0361 | slr0362 | slr5116 | ssr5117 | sll0644 | sll0645 | slr0869  | slr0870 |
| slr1736 | slr1737 | slr0076 | slr0077 | sll0690 | sll0691 | sll1958  | sll1959 |
| sll6054 | sll6055 | slr1280 | slr1281 | slr0742 | slr0743 | slr0670  | slr1400 |
| slr1452 | ssr2439 | sgl0001 | slr0698 | slr0505 | slr0506 | slr0724  | slr0725 |
| sll0837 | sll0838 | sll1228 | sll1229 | slr0819 | ssr1391 | sll1503  | sll1504 |
| ssr6026 | ssr6027 | slr1365 | slr1366 | sll0441 | sll0442 | sll1485  | sll1486 |
| slr1072 | slr1073 | slr0299 | slr0300 | sll1282 | sll1348 | slr1564  | slr1565 |
| sll1225 | sll1226 | sll1806 | sll1807 | slr1760 | slr1761 | sll1905  | sll1906 |
| sll0751 | sll0752 | slr1794 | ssr2998 | ssr6078 | ssr6079 | slr1073  | slr1074 |
| slr0074 | slr0075 | slr0457 | slr0458 | slr1591 | slr1592 | sll1104  | ssl2162 |
| sll0819 | ssr2831 | sll0448 | sll0449 | slr0787 | slr0788 | sll0063a | sll0064 |
| slr0605 | slr0605 | slr1656 | smr0004 | slr1719 | slr1720 | slr0317  | slr0318 |
| slr0909 | slr0912 | slr0703 | ssr1175 | slr0194 | slr0195 | sll1750  | sll1751 |
| sll0681 | sll0682 | sll0502 | sll0503 | slr0697 | ssr1169 | slr1863  | slr1864 |
| sll0634 | sll0635 | slr1895 | slr1896 | sll0677 | sll1716 | sll1474  | sll1780 |
| slr0976 | slr0977 | slr1046 | ssl2823 | slr2041 | slr2042 | slr0581  | slr0582 |
| sll1853 | sll1854 | sll1363 | ssl2667 | slr0236 | slr0237 | slr0926  | slr0927 |
| slr1515 | ssr2551 | slr7011 | slr7012 | sll0167 | sll0168 | slr1068  | slr1069 |
| slr1085 | slr1087 | slr1173 | ssr1951 | slr1331 | slr1332 | slr1562  | slr1563 |
| slr0769 | slr0770 | sll0409 | sll0410 | slr0592 | slr0593 | sll0938  | ssl1792 |
| sll1869 | sll1870 | slr1814 | slr1815 | slr0434 | slr0435 | slr1644  | slr1645 |
| slr1095 | slr1096 | sll1043 | sll1045 | sll0552 | sll0553 | ssr1765  | ssr1766 |
| sll1614 | sll1615 | sll1035 | ssl2009 | sll0405 | sll0406 | slr2075  | slr2076 |
| sll7002 | sll7003 | sll1733 | sll1734 | sll1106 | sll1107 | slr1929  | slr1930 |
| sll0802 | sll0803 | slr1062 | slr1063 | ssl2922 | ssl2923 | sll1806  | ssl3437 |
| slr0890 | ssr1499 | slr1142 | slr1143 | sll1830 | sll1831 | slr1347  | slr1348 |
| sll1315 | ssl2595 | slr1169 | slr1170 | sll1077 | sll1078 | slr0937  | slr0938 |
| slr1675 | slr1676 | slr0609 | slr0610 | sll0521 | sll0522 | slr1926  | slr1927 |
| slr1136 | slr1137 | ssl1922 | ssl1923 | slr7024 | slr7025 | slr1546  | slr1547 |
| ssl7038 | ssl7039 | slr1493 | slr1494 | sll0485 | sll0486 | slr0322  | slr1044 |
| sll5034 | sll5035 | sll8032 | sll8033 | slr0208 | ssr0330 | slr6094  | slr6095 |
| sll1605 | sll1606 | slr0815 | ssr1386 | sll1400 | ssl2733 | sll0765  | sll0766 |
| sll1582 | sll1583 | slr0374 | slr0376 | slr0757 | slr0758 | sll0517  | sll0518 |
| slr1168 | slr1169 | slr6090 | slr6091 | slr1443 | slr1444 | sll0931  | sll0932 |
| slr1635 | slr1636 | slr1204 | slr1205 | ssl3436 | ssl3437 | slr0020  | slr0021 |
| slr0207 | slr0208 | slr1900 | slr1901 | slr1034 | slr1035 | slr7095  | slr7096 |
| sll5122 | sll5123 | sll1823 | sll1824 | slr1246 | ssr2078 | slr0822  | slr0823 |
| sll0645 | sll0646 | sll0575 | sll0576 | slr0373 | slr0374 | sll1017  | sll1018 |
| slr0017 | slr0018 | slr0359 | slr0360 | sll0495 | slr1550 | slr0709  | slr0710 |
| slr0559 | slr0924 | sll0309 | sll0310 | sll0670 | sll0671 | slr0049  | ssr0102 |
| slr0509 | slr0510 | sll1240 | sll1241 | sll6093 | ssl6092 | slr2110  | slr2111 |
| sll0268 | sll0269 | slr1269 | slr1270 | slr1658 | slr1659 | sll0168  | sll0169 |
| slr0980 | slr0981 | sll1611 | sll1612 | slr0772 | slr0773 | slr0067  | slr0110 |
| slr0738 | slr0739 | slr2026 | slr2027 | slr2118 | slr2119 | sll0006  | sll0007 |
| sll1394 | sll1395 | sll1735 | sll1736 | slr1267 | slr1269 | slr1259  | slr1260 |
| slr7073 | ssr7072 | sll0175 | ssl0312 | slr1467 | slr1468 | slr6064  | slr6065 |
| slr0342 | slr0343 | slr1702 | slr1703 | slr0511 | ssr0871 | sll0564  | sll0565 |
| slr1260 | slr1261 | sll1834 | sll1835 | sll0253 | sll0254 | sll1671  | sll1672 |
| sll1832 | sll1833 | sll1595 | sll1596 | sll7069 | sll7070 | sll0776  | sll0777 |
| slr1887 | slr1888 | slr0355 | slr0356 | ssl0787 | ssl0788 | slr1198  | slr1199 |
| slr0552 | slr0553 | sll1638 | sll1639 | sll8007 | ssl8008 | slr0895  | slr0896 |

|         |         |         |         |         |         |         |         |
|---------|---------|---------|---------|---------|---------|---------|---------|
| slr1162 | slr1163 | sll1743 | sll1744 | slr0651 | slr0652 | sll1818 | sll1819 |
| sll0183 | sll0183 | sll0780 | sll0781 | smr0006 | ssr3451 | slr1705 | slr1706 |
| sll1814 | sll1815 | slr0888 | slr0889 | sll1060 | sll1061 | sll0178 | sll0888 |
| ssl7045 | ssl7046 | slr0730 | slr0731 | sll0602 | sll0603 | sll7062 | sll7063 |
| sll5061 | sll5062 | sll1910 | sll1911 | sll1716 | sll1717 | sll1817 | sll1818 |
| slr0462 | ssr0817 | sll0683 | sll0684 | sll1142 | sll1143 | sll0520 | sll0521 |
| sll1666 | sll1667 | slr0599 | slr0600 | slr0467 | slr0468 | slr0479 | slr0480 |
| slr2033 | slr2034 | slr0574 | slr0575 | slr0150 | slr0151 | sll0355 | sll0356 |
| sll0141 | sll0142 | sll1411 | ssl2749 | sll1694 | sll1695 | slr0783 | slr0784 |
| slr1730 | slr1731 | slr1199 | slr1200 | slr1623 | slr1624 | sll0384 | sll0385 |
| ssr1258 | ssr1765 | slr2112 | slr2113 | slr1075 | slr1076 | sll7086 | sll7087 |
| slr0774 | slr0775 | sll0926 | sll0927 | slr5054 | slr5055 | sll0816 | sll0817 |
| slr0722 | slr0723 | slr1865 | slr1866 | sll1599 | sll1600 | sgl0002 | sll0222 |
| sll1425 | sll1426 | sll0534 | sll0535 | slr5022 | slr5023 | slr0452 | slr0453 |
| slr2130 | slr2131 | slr1110 | slr1772 | sll0241 | sll0242 | slr1999 | ssr1258 |
| slr0213 | slr0214 | sll2013 | sll2014 | sll0621 | sll0622 | sll1570 | sll1571 |
| sll0359 | sll0360 | slr2048 | slr2049 | slr1520 | slr1521 | sll1432 | sll1433 |
| slr5111 | slr5112 | sll0280 | sll0281 | sll0593 | sll0594 | slr0093 | slr0095 |
| slr6008 | slr6009 | sll1414 | sll1415 | sll1812 | sll1813 | slr0903 | ssr1528 |
| slr0549 | slr0550 | sll1541 | slr1648 | sll5026 | ssl5027 | slr1708 | ssr2857 |
| slr0091 | slr0092 | sll1474 | sll1560 | sll8004 | ssl8005 | sll0766 | ssl1426 |
| sll1069 | ssl2084 | sll0860 | sll0861 | slr1790 | slr1791 | sll0170 | sll0171 |
| slr1600 | smr0005 | slr0303 | slr0304 | sll0802 | ssl1498 | sll1663 | sll1664 |
| sll2005 | sll2006 | sll0855 | sll0856 | sll0068 | sll0069 | sll0039 | sll0040 |
| sll1220 | sll1221 | slr1317 | slr1318 | ssr1398 | ssr1399 | sll1791 | sll1792 |
| slr1183 | slr1184 | sll1639 | sll1640 | sll1466 | ssl2823 | sll1534 | sll1535 |
| sll1256 | sll1257 | slr2116 | slr2117 | slr0088 | slr0089 | slr1409 | slr1410 |
| slr0285 | slr0286 | slr1239 | slr1240 | slr1200 | slr1201 | sll1427 | slr1204 |
| sll0296 | sll0297 | sll0777 | sll0778 | sll1289 | sll1290 | sml0006 | ssl3441 |
| slr1098 | slr1099 | slr6072 | slr6073 | sll0038 | sll0039 | sll8042 | ssl8041 |
| slr0645 | slr0646 | sll0085 | sll0086 | sll1898 | sll1899 | slr1901 | slr1902 |
| slr1051 | slr1052 | sll0783 | sll0784 | sll0985 | sll0986 | slr0209 | ssr0330 |
| slr0184 | slr0185 | slr8015 | slr8016 | slr0502 | slr0503 | slr1407 | slr1409 |
| slr0713 | smr0003 | sll1298 | sll1299 | sll1710 | sll1716 | slr0553 | slr0554 |
| sll1530 | sll1531 | sll0549 | sll0550 | sll1787 | sll1789 | sll1804 | sll1805 |
| slr0944 | slr0945 | sll5048 | sll5049 | sll0711 | sll0712 | sll1655 | sll1656 |
| ssr6002 | ssr6003 | slr1116 | slr1117 | sll0779 | sll0780 | slr1262 | slr1263 |
| slr0264 | slr0265 | slr0065 | slr0066 | sll1101 | sll1102 | sll0336 | sll0337 |
| sll0161 | ssl0296 | slr0142 | slr0143 | slr1115 | slr1116 | slr1652 | slr1653 |
| slr6038 | slr6039 | sll0396 | sll0397 | sll0503 | sll0504 | slr0981 | slr0982 |
| slr7081 | slr7082 | slr0526 | slr0527 | slr6080 | ssr6079 | sll1070 | sll1071 |
| sll0250 | ssl0461 | sll1477 | sll1479 | slr0638 | slr0639 | slr1106 | slr1768 |
| ssl5095 | ssl5096 | sll0486 | sll0487 | slr2101 | slr2102 | sll0227 | sll0228 |
| slr1413 | slr1414 | slr1209 | slr1210 | slr1628 | slr1629 | slr0825 | ssr1398 |
| slr1194 | slr1195 | slr7058 | slr7059 | slr0957 | slr0958 | sll1426 | sll1427 |
| sll1041 | sll1318 | sll1765 | sll1766 | slr5093 | ssr5092 | sll1358 | sll1359 |
| slr6073 | slr6074 | sll1808 | sll1809 | sll1908 | sll1909 | slr1050 | slr1051 |
| slr0392 | slr0393 | sll1484 | sll1485 | sll1957 | sll1958 | slr1667 | slr1668 |
| sll2010 | sll2011 | slr0269 | slr0270 | sll1742 | sll1743 | sll1662 | sll1663 |
| sll0938 | sll0939 | ssr6019 | ssr6020 | slr1185 | slr1186 | slr0150 | ssl0020 |
| slr1550 | ssr2611 | sll1462 | sll1463 | sll0394 | sll0395 | sll0012 | sll1716 |



|         |         |         |         |         |         |         |         |
|---------|---------|---------|---------|---------|---------|---------|---------|
| sl11296 | ssl2559 | sl10990 | sl10992 | sl10156 | sl10157 | sl10676 | ssl1277 |
| slr1273 | slr1274 | sl11096 | sl11097 | sl10443 | sl10444 | slr1250 | slr1251 |
| slr5119 | ssr5120 | sl11155 | sl11156 | sl11574 | sl11575 | slr1774 | slr1776 |
| slr2006 | slr2007 | slr7010 | slr7011 | sl11028 | sl11030 | sl11224 | ssl2420 |
| sl10915 | sl10916 | sl10421 | sl10422 | sl10423 | sl10424 | slr0655 | slr0656 |
| slr0835 | slr0836 | sl10100 | slr1653 | sl17030 | sl17031 | sl11578 | sl11579 |
| sl11400 | sl11401 | slr6104 | slr6105 | slr1615 | slr1616 | sl10414 | sl10415 |
| slr1149 | slr1150 | slr0168 | slr0169 | slr1880 | slr1880 | sl11049 | sl11051 |
| sl10382 | sl10383 | sl10321 | sl10322 | slr7104 | slr7105 | sl11527 | sl11528 |
| sl11724 | sl11725 | sl10752 | sl10753 | sl11293 | sl11294 | sl11305 | slr1751 |
| sl11173 | sl11174 | sl10194 | sl10195 | sl11694 | slr1456 | sl11680 | sl11681 |
| slr1856 | slr1857 | sl11916 | sl11917 | slr1673 | slr1674 | slr0618 | slr0619 |
| sl10856 | slr1204 | sl11212 | sl11213 | slr1030 | slr1031 | slr1912 | slr1913 |
| slr0454 | slr0455 | slr1384 | ssr2317 | sl11871 | sl11872 | slr0900 | slr0901 |
| sl11815 | ssl3441 | sl10379 | sl10380 | sl12009 | sl12010 | slr0606 | slr0607 |
| slr1293 | ssr2142 | slr0383 | slr0384 | sl11769 | ssl3383 | slr0323 | slr0324 |
| slr1406 | slr1407 | sl11709 | ssl3291 | slr6031 | ssr6032 | sl11260 | sl11261 |
| slr1666 | ssr2781 | sl10654 | sl10656 | sl11474 | sl11475 | slr1616 | slr1617 |
| sl10657 | ssl1255 | slr1084 | slr1085 | sl11744 | sl11745 | slr2080 | ssr3532 |
| slr0151 | slr0152 | slr0596 | slr0597 | slr0082 | slr0083 | slr0156 | slr0157 |
| slr0789 | slr0790 | slr1368 | slr1369 | sl10200 | sl10201 | slr1455 | slr1456 |
| sl11182 | slr1185 | slr0397 | slr0398 | slr5037 | slr5038 | sl11262 | sl11263 |
| sl15094 | ssl5095 | sl11676 | sl11677 | slr1247 | slr1248 | sl11081 | sl11082 |
| slr1715 | slr1716 | slr1342 | slr1343 | slr0006 | slr0007 | sl10083 | sl10084 |
| sl11304 | sl11305 | slr0659 | slr0661 | sl10930 | sl10931 | sl10022 | sl10023 |
| sl17075 | ssl7074 | slr1129 | slr1130 | sl15046 | ssl5045 | slr8046 | ssr8047 |
| slr0699 | slr0700 | sl11581 | sl11582 | slr2100 | slr2101 | sl10702 | sl10703 |
| sl15042 | sl15043 | slr1979 | slr1980 | slr1390 | slr1391 | slr0585 | slr0586 |
| slr1206 | slr1207 | sl11428 | ssl2789 | sl10431 | sl10846 | slr1266 | slr1267 |
| slr0216 | slr0217 | sl10376 | sl10377 | slr1329 | slr1330 | ssr2060 | ssr2061 |
| ssl5064 | ssl5065 | slr0491 | slr0492 | sl11526 | sl11527 | slr0070 | slr0467 |
| slr2121 | slr2122 | sl10759 | sl10760 | sl10369 | sl10370 | slr1282 | slr1283 |
| sl10543 | ssl1046 | slr1653 | slr1653 | slr0942 | slr0943 | slr1518 | ssr2554 |
| slr1435 | slr1436 | slr1689 | slr1690 | slr0877 | ssr1480 | sl10665 | sl11716 |
| sl10853 | sl10854 | sl10868 | sl10869 | slr1829 | slr1830 | slr1177 | slr1178 |
| sl10033 | sl10034 | sl11407 | sl11408 | slr1853 | slr1854 | sl11408 | sl11409 |
| sl15033 | sl15034 | sl11801 | sl11802 | sl12014 | sl12015 | slr1689 | ssr2831 |
| slr6080 | slr6081 | slr0851 | slr0852 | sl10895 | sl10896 | slr1767 | ssr2962 |
| sl11860 | sl11861 | sl11698 | sl11699 | sl10176 | sl10177 | sl11323 | sl11324 |
| sl10172 | sl10173 | slr8045 | slr8046 | slr7014 | slr7015 | slr0954 | slr0955 |
| slr0318 | slr0319 | slr0619 | ssr1041 | slr0864 | slr0865 | slr1196 | slr1197 |
| sl10506 | sl10507 | slr0533 | slr1044 | slr1070 | slr1071 | slr0250 | slr0251 |
| slr0925 | slr0925 | sl11803 | ssl3432 | slr0322 | slr0323 | slr2007 | slr2008 |
| sl10726 | sl10727 | slr2024 | slr2025 | sl17028 | sl17029 | slr7037 | ssr7036 |
| sl11476 | sl11477 | slr1363 | slr1364 | sl10100 | sl10100 | slr0542 | slr0543 |
| slr1330 | slr1331 | slr8014 | ssr8013 | slr0379 | slr0380 | slr0376 | slr0377 |
| slr0350 | slr0351 | slr1842 | slr1843 | sl11020 | sl11021 | slr1223 | slr1224 |
| slr0417 | slr0418 | slr1033 | ssr1720 | sl10763 | sl10764 | slr6028 | slr6029 |
| slr1101 | slr1102 | slr1612 | slr1613 | sl11805 | ssl3436 | sl10102 | sl10103 |
| sl11810 | sl11811 | slr1254 | slr1255 | slr0050 | ssr0102 | sl11436 | sl11437 |
| slr1043 | slr1044 | slr1931 | slr1932 | slr1978 | slr1979 | slr1881 | slr1882 |

|         |         |         |         |         |         |         |         |
|---------|---------|---------|---------|---------|---------|---------|---------|
| slI5049 | slI5050 | slI1734 | slI1735 | slr7094 | slr7095 | slr0583 | slr0825 |
| slr1533 | slr1534 | slr1103 | slr1104 | slI0284 | slI0286 | slI1577 | slI1578 |
| slI8009 | ssl8008 | slr1453 | slr1454 | slr0964 | slr0965 | slr2135 | slr2136 |
| slr2009 | slr2010 | slr1274 | slr1275 | slI0254 | slI1182 | slI1001 | ssl1918 |
| slr0040 | slr0041 | slr0703 | smr0002 | slI0863 | slI0864 | slr0990 | slr0992 |
| slr1258 | slr1259 | slr0513 | slr0514 | slI1862 | slI1863 | slr1234 | slr1235 |
| slI5062 | slI5063 | slr1991 | slr1992 | slI1723 | slI1724 | slI1119 | slI1119 |
| slr1276 | slr1277 | slI1225 | ssl2420 | slI0638 | slI0639 | slI1036 | ssl2009 |
| slI0666 | slI1710 | slI0625 | slI0626 | slr1611 | slr1612 | slI1318 | slI1319 |
| slI1399 | ssl2733 | slr0042 | slr0043 | slI0749 | slI0750 | ssl7021 | ssl7022 |
| slI0467 | slI0597 | slI0317 | slI1780 | slr0608 | slr0609 | slI0317 | slI1560 |
| slr0654 | slr0655 | slr0114 | slr0115 | slI1693 | slI1694 | slr0328 | slr0329 |
| slr8021 | slr8022 | slr0969 | slr0971 | slr1861 | slr1862 | slI1451 | slI1452 |
| slr6041 | slr6042 | slr6047 | ssr6046 | slI1058 | slI1059 | slr6005 | slr6006 |
| slr0677 | slr0678 | slI7089 | slI7090 | slr2079 | ssr3532 | slI1874 | slI1875 |
| slI0263 | slI0264 | slI8002 | ssl8003 | slr0483 | slr0484 | slr0984 | slr0985 |
| slI0176 | ssl0312 | slr1674 | slr1675 | slI1102 | slI1103 | slI0553 | slI0554 |
| slI1390 | slI1866 | slr1302 | slr1303 | slI1372 | slI1373 | slr1638 | slr1639 |
| slI1715 | slI1716 | slI0786 | slI0787 | slI0716 | slr1377 | slr2046 | slr2047 |
| slI0741 | slI0742 | slr1585 | slr1586 | slr1859 | slr1860 | slr0519 | slr0520 |
| slI0832 | slI0833 | slr1044 | slr2099 | slr1847 | slr1848 | slr2037 | slr2038 |
| slI1299 | slI1300 | slr1261 | slr1262 | slr1133 | slr1134 | slr0607 | slr0608 |
| slr6066 | slr6067 | slr0809 | slr0810 | slI0817 | ssl1520 | slI1979 | slI1980 |
| slI0897 | ssl1707 | slI1108 | slI1109 | slI1380 | slI1381 | slr7057 | slr7058 |
| slr0902 | ssr1527 | slI1994 | slI1995 | slI0838 | slI0839 | slr0936 | slr0937 |
| slr1078 | ssr1766 | slI1555 | slI1556 | slr0166 | ssr0256 | slr0904 | ssr1528 |
| slr1599 | slr1600 | slr1744 | slr1746 | slI1229 | slr1044 | slr1590 | slr1591 |
| slI1326 | slI1327 | slI0100 | slI0101 | slr6105 | slr6106 | slI1433 | slI1434 |
| slr0870 | slr0871 | slr0637 | slr0638 | slI0201 | slI0431 | slr0086 | slr0088 |
| slI8034 | slI8035 | slr1507 | slr1508 | slr0946 | slr0947 | slr0191 | slr0192 |
| slr1305 | slr1306 | slr0063 | slr0064 | slI0861 | slI0862 | slI1635 | sml0005 |
| slI0685 | slI1980 | slr1032 | slr1033 | slI1811 | slI1812 | slI1931 | slI1932 |
| slr1906 | slr1907 | slI8011 | slI8012 | slI0493 | slI0902 | slr1773 | slr1774 |
| slI1786 | ssl2233 | slI0383 | slI0384 | slr1240 | slr1241 | slr2120 | slr2121 |
| slI2012 | slI2013 | slr0689 | ssr1155 | slr6025 | ssr6024 | slI0012 | slI0665 |
| slr2036 | slr2037 | slr1424 | slr1425 | slI0319 | slI0320 | ssl0452 | ssl0453 |
| slr8037 | slr8038 | slr1234 | ssr2049 | slI8027 | ssl8028 | slI0584 | slI0585 |
| slr0387 | slr0388 | slI0665 | slI0666 | slI0027 | slI1733 | slI0539 | slI0540 |
| slI0980 | slI0981 | slI0622 | slI0623 | slr6031 | ssr6030 | slI8006 | slI8007 |
| slr0598 | slr0599 | slr1066 | slr1067 | slI0544 | slI0545 | slI0596 | slI0597 |
| slr0695 | slr1590 | slI0084 | slI0085 | slI0545 | slI0546 | slr6007 | slr6008 |
| slr1044 | slr1414 | slr0144 | slr0145 | slr1436 | slr1437 | slr1055 | slr1056 |
| slr0148 | slr0149 | slr0369 | slr0370 | slr1664 | slr1665 | slr1913 | slr1914 |
| slr0929 | slr0930 | slr1097 | slr1098 | slI1154 | slI1155 | slr0919 | slr0920 |
| slr1113 | slr1501 | slI0784 | slI0785 | ssl5098 | ssl5099 | slI0658 | ssl1255 |
| slI0677 | slI0678 | slr1385 | ssr2318 | slI0699 | slI0846 | slI1783 | slI1784 |
| slr0333 | slr0334 | slr2046 | ssr3467 | slI0847 | slI0848 | slI0686 | slI0687 |
| slI0242 | slI0243 | slr0755 | ssr1258 | slI1652 | slI1653 | slI0762 | slI0763 |
| slI1450 | slI1451 | slI5026 | ssl5025 | slI1156 | slI1157 | slr1434 | slr1435 |
| slr1083 | slr1084 | slr1301 | slr1302 | slr1454 | slr1455 | slI1556 | slI1557 |
| slr0090 | slr0091 | slr0058 | slr0059 | slI1232 | slI1233 | slr1813 | slr1814 |

|         |         |         |         |         |         |         |         |
|---------|---------|---------|---------|---------|---------|---------|---------|
| slr0168 | slr0338 | sll1060 | ssl2069 | sll1166 | sll1447 | sll1997 | sll1998 |
| sll0249 | ssl0461 | slr6084 | ssr6083 | slr0360 | slr0361 | sll1568 | sll1927 |
| slr0455 | slr0456 | slr0812 | slr0813 | sll1932 | sll1933 | sll0264 | sll0265 |
| sll1675 | sll1676 | sll0677 | ssl1277 | slr1923 | slr1924 | sll1702 | sll1703 |
| slr7097 | slr7098 | sll1423 | ssl2781 | sll1023 | sll1024 | sll0687 | sll0688 |
| sll0158 | sll0160 | sll1217 | sll1218 | slr5053 | slr5054 | slr0399 | slr0400 |
| slr1839 | slr1840 | slr1702 | ssr2843 | sll1001 | sll1002 | slr0600 | slr0601 |
| slr7041 | ssr7040 | slr1549 | ssr2611 | sll1080 | sll1081 | sll1764 | sll1765 |
| slr1924 | slr1925 | slr0899 | slr0900 | slr0786 | slr0918 | sll1809 | sll1810 |
| sll0933 | ssl1784 | sll1239 | sll1240 | slr1608 | ssr2711 | sll0183 | sll0274 |
| slr0963 | slr0964 | slr1909 | slr1910 | slr1202 | slr1203 | sll0933 | sll0934 |
| sll1679 | sll1680 | sll0661 | ssl1263 | slr6063 | ssr6062 | sll1473 | sll1474 |
| sll1405 | sll1406 | sll1071 | sll1072 | sll0361 | sll0362 | slr1739 | slr1740 |
| sll1479 | sll1481 | slr0468 | slr0469 | slr1257 | slr1258 | sll0875 | sll0876 |
| sll1255 | sll1474 | sll0217 | sll0218 | slr1759 | slr1760 | slr6063 | slr6064 |
| sll0666 | sll1716 | slr1211 | slr1212 | slr1990 | slr1991 | slr1174 | ssr1951 |
| slr0793 | slr0794 | sll1291 | sll1292 | sll1305 | slr0008 | slr1491 | slr1492 |
| slr0115 | slr0116 | slr1185 | slr1185 | sll1714 | sll1715 | sll1270 | sll1271 |
| sll1222 | sll1223 | slr0707 | slr0708 | sll0739 | sll0740 | slr0495 | slr0496 |
| sll1864 | slr0172 | slr0211 | ssr0332 | slr2115 | slr2116 | slr0917 | slr0918 |
| sll1349 | sll1350 | slr1509 | slr1510 | slr1034 | ssr1720 | sll0661 | sll0662 |
| slr1456 | slr1457 | slr0679 | slr0680 | sll0371 | ssl0738 | slr0031 | slr0032 |
| sll1198 | ssl2384 | slr1828 | slr1829 | sll0808 | ssl1507 | slr8036 | slr8037 |
| slr5012 | slr5013 | slr2011 | slr2012 | sll1018 | sll1019 | sll0431 | sll0700 |
| sll1912 | sll1913 | slr1808 | slr1809 | ssr2802 | ssr2803 | sll0183 | ssl0353 |
| sll1629 | sll1630 | slr0676 | slr0677 | slr0634 | slr0635 | sll1377 | sll1378 |
| sll1682 | sll1683 | sll0754 | ssl1417 | sll0473 | sll0474 | slr0400 | slr0401 |
| sll0680 | sll0681 | sll0899 | sll0900 | slr0642 | slr0643 | slr1063 | slr1443 |
| slr0011 | slr0012 | sll1598 | sll1599 | sll0519 | sll0520 | sll0181 | ssl0350 |
| slr1071 | slr1072 | sll1967 | sll1968 | sll0018 | sll0019 | slr0728 | slr0729 |
| sll1265 | sll1267 | sll0445 | sll0446 | sll0023 | sll0024 | slr0535 | slr0536 |
| slr0601 | slr0602 | sll1120 | sll1121 | sll0047 | sll0048 | sll0281 | sll0282 |
| slr0344 | slr0345 | sll1752 | sml0005 | sll0546 | sll0547 | sll0062 | sll0063 |
| sll1459 | sll1461 | sll0735 | sll0736 | slr1233 | ssr2047 | slr7012 | slr7013 |
| slr1437 | slr1438 | slr6004 | ssr6003 | slr1138 | slr1139 | sll1085 | sll1566 |
| sll1816 | sml0006 | sll1053 | sll1054 | slr1275 | slr1276 | slr1139 | slr1140 |
| sll1187 | sll1188 | sll0144 | sll0145 | slr1229 | slr1230 | slr6025 | ssr6026 |
| slr1077 | ssr1765 | slr1541 | slr1542 | slr0503 | slr0505 | sll1800 | sll1801 |
| slr0739 | slr0740 | slr5055 | slr5056 | sll0271 | sll0272 | slr0903 | ssr1527 |
| slr1571 | slr1572 | sll1316 | slr1185 | sll0782 | ssl0564 | slr0921 | slr0922 |
| sll1659 | sll1660 | sll0920 | sll0921 | slr0120 | slr0121 | sll1998 | sll1999 |
| sll0335 | sll0336 | sll0413 | ssl0787 | sll5060 | sll5061 | sll0684 | sll0685 |
| sll0431 | sll0699 | sll1890 | sll1891 | slr1044 | slr1045 | slr1041 | slr1042 |
| sll1861 | sll1862 | slr0232 | slr0233 | slr0053 | slr0054 | slr0741 | slr0742 |
| sll0254 | sll1027 | slr0324 | slr0325 | slr1542 | slr1543 | sll1263 | ssl1498 |
| sll6060 | ssl6061 | sll1202 | sll1203 | slr1521 | slr1522 | sll0095 | sll0096 |
| slr0853 | slr0854 | slr0982 | slr0983 | slr1081 | ssr1768 | sll7047 | ssl7048 |
| sll1272 | sll1273 | slr0327 | slr0328 | slr0240 | slr0241 | slr6012 | slr6013 |
| sll5043 | sll5044 | slr1182 | slr1183 | ssr5019 | ssr5020 | sll7006 | ssl7007 |
| slr1034 | slr1034 | sll1960 | sll1961 | sll0818 | ssl1520 | sll1816 | sll1817 |
| slr0955 | slr0957 | slr1210 | slr1211 | slr7091 | slr7092 | sll0744 | sll0745 |

|         |         |         |         |         |         |         |         |
|---------|---------|---------|---------|---------|---------|---------|---------|
| sl1040  | sl1041  | sl10188 | sl10189 | slr1565 | slr1566 | slr0294 | slr0392 |
| slr0989 | slr0990 | sl10183 | sl11011 | sl11987 | sl11988 | slr0013 | slr0014 |
| sl10012 | sl10677 | slr6039 | slr6040 | slr6090 | ssr6089 | sl10218 | sl10219 |
| sl10857 | sl10858 | slr0912 | slr0913 | sl11182 | sl11369 | slr8044 | slr8045 |
| slr1898 | slr1899 | sl11505 | ssl2920 | smr0006 | smr0007 | slr0406 | slr0407 |
| slr0055 | slr0056 | slr1423 | slr1424 | sl10012 | sl11710 | slr1917 | slr1918 |
| slr1807 | slr1808 | slr5073 | ssr5074 | sl11528 | slr1443 | sl11353 | sl11354 |
| slr0249 | slr0250 | sl10912 | sl10913 | sl10830 | ssl1552 | sl11562 | sl11563 |
| slr1307 | ssr1604 | sl18040 | ssl8039 | slr8014 | slr8015 | slr1645 | slr1646 |
| slr0487 | slr0488 | sl11504 | sl11505 | sl11051 | sl11052 | ssr2061 | ssr2061 |
| sl11022 | sl11023 | slr6067 | slr6068 | slr0649 | slr0650 | slr1885 | slr1886 |
| sl10646 | sl10647 | slr0251 | slr0252 | slr1910 | slr1911 | slr0922 | slr0923 |
| slr0156 | slr0156 | sl11369 | sl11370 | slr1137 | slr1138 | sl10220 | sl10221 |
| sl11813 | sl11814 | sl11305 | sl11306 | ssl5113 | ssl5114 | sl10254 | sl11316 |
| slr6087 | slr6088 | slr1762 | slr1763 | slr7015 | slr7016 | sl15046 | sl15047 |
| slr0195 | slr0196 | slr1928 | slr1929 | sl10525 | ssl1004 | slr1069 | slr1070 |
| slr1998 | slr1999 | slr5077 | slr5078 | slr1915 | slr1916 | slr6047 | ssr6048 |
| slr1233 | ssr2049 | sl10651 | sl10700 | sl11316 | sl11317 | sl11382 | slr0150 |
| slr1690 | slr1691 | sl11404 | sl11405 | slr0525 | slr0526 | slr2044 | slr2045 |
| sl10630 | sl10631 | sl11472 | sl11473 | sl11292 | sl11293 | sl10932 | ssl1784 |
| slr1718 | slr1719 | slr0820 | ssr1391 | sl11382 | sl11383 | slr2043 | slr2044 |
| slr0378 | slr0379 | slr0808 | slr0809 | sl11213 | sl11214 | slr1492 | slr1493 |
| sl11202 | sl11409 | slr6050 | slr6051 | sl10007 | sl10008 | sl10909 | sl10910 |
| slr1943 | ssr3304 | sl11249 | sl11250 | sl11912 | ssl3615 | sl11802 | ssl3432 |
| sl10504 | sl10505 | sl10666 | sl10677 | sl11968 | sl11969 | sl11481 | sl11482 |
| slr1316 | slr1317 | sl11191 | sl11192 | sl10856 | sl11427 | sl11708 | ssl3291 |
| slr1279 | slr1280 | ssr6085 | ssr6086 | slr6065 | slr6066 | sl10252 | ssl0467 |
| slr5126 | slr5127 | sl10267 | sl10268 | sl10665 | sl10677 | sl15030 | ssl5031 |
| sl10418 | sl10419 | sl15044 | ssl5045 | sl11488 | slr0993 | slr1838 | slr1839 |
| sl15032 | ssl5031 | sl11180 | sl11181 | sl10787 | ssl1464 | sl10223 | ssl0410 |
| slr1127 | slr1128 | slr0551 | slr0552 | sl10755 | sl10756 | slr1618 | slr1619 |
| ssl1920 | ssl1922 | sl11900 | ssl3580 | slr1195 | slr1196 | slr1679 | ssr2799 |
| slr0794 | slr0795 | sl10419 | sl10420 | slr1957 | slr1958 | slr1540 | slr1541 |
| slr1670 | slr1672 | slr1074 | slr1075 | slr0112 | slr0114 | sl10792 | sl10793 |
| sl11488 | sl11489 | sl10135 | ssl0242 | sl11658 | sl11659 | slr0983 | slr0984 |
| slr0038 | slr0039 | sl10094 | sl10095 | sl17050 | ssl7051 | sl10181 | sl10182 |
| sl17003 | ssl7004 | sl11443 | sl11444 | sl11348 | sl11349 | sl11579 | sl11580 |
| sl11079 | sl11080 | slr0818 | slr0819 | slr0746 | slr0747 | sl15130 | sl15131 |
| slr1852 | slr1853 | slr0935 | slr0936 | slr0145 | slr0146 | sl10272 | sl10273 |
| slr0589 | slr0590 | slr7098 | slr7099 | slr0529 | slr0530 | slr1489 | slr1490 |
| slr6045 | ssr6046 | sl10020 | slr0156 | slr1855 | slr1856 | slr0075 | slr0076 |
| slr1245 | ssr2078 | sl11283 | sl11284 | slr1444 | ssr2422 | sl11821 | sl11822 |
| slr1090 | ssr1789 | sl11939 | sl11940 | sl11255 | sl11780 | slr1617 | slr1618 |
| sl11691 | sl11692 | sl17066 | sl17067 | slr1167 | slr1168 | sl10070 | sl10071 |
| slr0844 | ssr1425 | slr1414 | slr1415 | sl10262 | sl10263 | slr0186 | slr0359 |
| sl15035 | sl15036 | slr7092 | ssr7093 | sl10373 | sl10374 | slr0377 | slr0378 |
| sl11528 | sl11530 | slr0304 | slr0305 | sl11770 | sl11771 | slr1841 | slr1842 |
| slr1704 | ssr2848 | slr1843 | slr1844 | sl10099 | sl10100 | slr2073 | slr2074 |
| sl10629 | sl10630 | sl11983 | sl11984 | slr1235 | slr1236 | sl11483 | sl11484 |
| sl10822 | sl10823 | slr6013 | slr6014 | slr0415 | slr0416 | slr1969 | ssr3341 |
| slr6021 | slr6022 | sl11398 | sl11399 | sl10174 | sl10175 | sl10649 | sl10650 |

|         |          |         |         |         |         |         |         |
|---------|----------|---------|---------|---------|---------|---------|---------|
| slr1076 | slr1077  | sll5069 | ssl5068 | slr0856 | slr0857 | slr0978 | slr0980 |
| sll1434 | sll1435  | slr0460 | slr1683 | slr0852 | slr0853 | sll0183 | ssl0352 |
| sll1883 | sll1884  | slr0756 | slr0757 | slr0156 | slr1641 | sll0647 | sll0648 |
| sll0063 | sll0063a | sll1223 | sll1224 | sll1712 | sll1713 | slr0053 | ssr0109 |
| slr1377 | slr1378  | slr1751 | slr1752 | sll0478 | sll0479 | slr1811 | slr1812 |
| sll7043 | ssl7042  | slr1063 | slr1064 | sll1872 | sll1873 | slr7023 | slr7024 |
| slr1572 | slr1573  | slr1114 | slr1115 | slr2119 | slr2120 | slr0965 | slr0966 |
| sll1525 | ssl2971  | sll1068 | ssl3451 | slr1730 | ssr2912 | slr1753 | slr1755 |
| sll0368 | sll0369  | sll0269 | sll0270 | sll0754 | sll0755 | slr0833 | slr0835 |
| sll0377 | sll0378  | slr6021 | ssr6020 | slr5101 | slr5102 | sll1229 | sll1231 |
| sll1284 | sll1285  | sll1161 | sll1162 | sll1959 | sll1960 | sll1464 | ssl2823 |
| sll1444 | sll1446  | sll1124 | ssl2233 | sll0497 | sll0498 | slr1812 | slr1813 |
| slr0484 | slr0487  | sll0698 | sll0699 | slr2114 | slr2115 | sll0843 | sll0844 |
| sll1709 | sll1710  | ssl5007 | ssl5008 | slr1463 | slr1464 | slr1646 | slr1647 |
| slr1289 | slr1290  | sll1573 | sll1574 | sll5109 | ssl5108 | slr1396 | slr1397 |
| slr1045 | slr1046  | slr1490 | slr1491 | slr6100 | slr6101 | sll0690 | ssl1300 |
| sll1061 | sll1062  | slr1794 | slr1795 | slr1963 | slr1964 | slr1877 | slr1878 |
| slr1272 | slr1273  | sll1323 | ssl2615 | sll0145 | sll0146 | sll1151 | ssl2296 |
| sll0444 | sll0445  | slr1449 | slr1450 | sll0767 | ssl1426 | ssr5120 | ssr5121 |
| sll0862 | sll0863  | sll1984 | sll1985 | slr2035 | smr0008 | slr1052 | slr1053 |
| slr1538 | slr1540  | sll1771 | sll1772 | slr1510 | slr1511 | sll0750 | sll0750 |
| slr0164 | slr0165  | slr5021 | slr5022 | sll1500 | sll1501 | sll0996 | sll0997 |
| slr2008 | slr2009  | slr2124 | slr2125 | slr0054 | slr0055 | slr1899 | slr1900 |
| sll0849 | sll0851  | sll0993 | sll0994 | slr2059 | slr2060 | slr1218 | slr1219 |
| slr7101 | slr7102  | sll0554 | sll0555 | sll0682 | sll0683 | sll0236 | ssl0438 |
| sll1119 | slr1880  | slr1201 | slr1202 | slr1773 | ssr2972 | slr2098 | slr2099 |
| sll1954 | ssl3692  | slr6040 | slr6041 | slr1681 | slr1682 | slr1469 | slr1470 |
| sll1131 | sll1132  | slr0940 | slr0941 | sll7065 | sll7066 | sll0810 | sll0811 |
| sll0891 | ssl1690  | slr5118 | ssr5117 | slr0147 | slr0148 | slr7100 | slr7101 |
| sll1130 | ssl2245  | slr0095 | slr0096 | slr1927 | slr1928 | sll0258 | sll1194 |
| sll1867 | sml0001  | slr1469 | smr0011 | sll0258 | sll0427 | slr1916 | slr1917 |
| sll0729 | ssl1378  | slr0236 | slr0236 | slr6071 | slr6072 | sll0412 | sll0413 |
| slr0930 | ssr1558  | slr7080 | ssr7079 | slr0807 | slr0808 | slr1096 | slr1097 |
| sll1185 | sll1186  | sll1722 | sll1723 | slr0287 | ssr0482 | sll0699 | sll0700 |
| slr1614 | slr1615  | sll0337 | slr1044 | sll1561 | sll1562 | slr0110 | slr0111 |
| slr1944 | slr1945  | slr0288 | slr0291 | slr1364 | slr1365 | slr2002 | slr2003 |
| sll1352 | sll1353  | slr5087 | slr5088 | slr1693 | slr1694 | slr0588 | slr0589 |
| sll0293 | sll0294  | slr0262 | slr0263 | sll1867 | slr1311 | slr0080 | slr0081 |
| sll1725 | sll1726  | slr1287 | slr1288 | slr1648 | ssr2754 | sll1510 | sll1511 |
| slr0321 | slr0322  | sll0400 | sll0401 | sll0873 | ssl1633 | slr0239 | slr0240 |
| slr0862 | slr0863  | sll0487 | sll0488 | sll2001 | ssl2749 | sll1103 | sll1104 |
| slr0072 | slr0073  | sll0856 | sll0857 | sll0788 | sll0789 | slr0456 | slr0457 |
| slr0149 | slr0150  | sll0716 | sll1043 | sll1926 | sll1927 | sll0648 | sll0649 |
| sll1321 | sll1322  | sll5066 | ssl5065 | sll1423 | sll1424 | slr1936 | slr1937 |
| slr0502 | slr0609  | sll5090 | ssl5091 | slr0041 | slr0042 | sll0224 | sll0225 |
| slr0737 | slr0738  | slr1484 | slr1485 | sll1281 | sll1282 | ssl3382 | ssl3383 |
| slr0624 | slr0625  | sll0776 | slr1063 | slr0380 | slr0381 | slr0210 | ssr0332 |
| slr6096 | slr6097  | slr7013 | slr7014 | sll1915 | sll1916 | sll1557 | sll1558 |
| slr2080 | slr2081  | slr1315 | slr1316 | slr0966 | slr0967 | sll1549 | sll1550 |
| slr1383 | ssr2317  | sll1276 | sll1277 | sll1528 | slr1225 | sll5066 | sll5067 |
| sll0237 | ssl0438  | sll0886 | sll0887 | sll0815 | sll0816 | slr0242 | slr0243 |

|         |          |         |         |         |         |         |         |
|---------|----------|---------|---------|---------|---------|---------|---------|
| slI0738 | slI0739  | slr1238 | ssr2061 | slr1311 | sml0001 | slI0446 | slI0447 |
| slI0640 | slI0641  | slI1342 | slI1343 | slr1977 | slr1978 | slr1720 | slr1721 |
| slI6053 | slI6054  | slr0171 | slr0172 | slI1030 | slI1031 | slr1601 | smr0005 |
| slr2082 | slr2083  | slI1763 | slI1764 | slI0709 | slI0710 | slr1327 | ssr2201 |
| slr1203 | slr1204  | slI1482 | slI1483 | smr0007 | smr0008 | slr1198 | ssr2009 |
| slr0032 | slr0033  | slr1081 | slr1082 | slr1999 | slr2000 | slr0746 | slr1588 |
| slI0254 | slr1254  | slr0341 | slr0784 | slr6014 | slr6015 | slI1095 | slI1096 |
| slI1745 | slI1746  | slr1224 | slr1225 | slr6049 | ssr6048 | slr1544 | ssr2595 |
| slr1934 | slr1935  | slr1576 | slr1577 | slI1775 | slI1776 | slI5128 | ssl5129 |
| slr0261 | slr0262  | slr0799 | slr0800 | slr0949 | slr0950 | slI0613 | slI0614 |
| slI0201 | slI0700  | slI1098 | slI1099 | slI7047 | ssl7046 | slI1737 | slI1738 |
| slr2070 | slr2071  | slI0201 | slI0651 | slr0514 | slr0516 | slI1819 | slI1820 |
| slr0664 | ssr1114  | slr7016 | ssr7017 | slr0541 | slr0542 | slr1082 | slr1083 |
| slI5131 | slI5132  | slr0723 | slr0724 | slr0237 | slr0238 | slI1762 | slI1763 |
| slr1442 | slr1443  | slr2004 | ssr3402 | slr1902 | slr1903 | slr0196 | slr0197 |
| slI1162 | slI1163  | slr0886 | slr0887 | slr0959 | slr0960 | slr2016 | slr2017 |
| slr0770 | slr0771  | slr0386 | slr0387 | slr1721 | slr1722 | ssr0759 | ssr0761 |
| slI1221 | slI1222  | slr1729 | ssr2912 | slI0451 | slI1542 | slI1021 | slI1022 |
| slI0685 | slI0686  | slI1469 | slI1712 | slI0408 | slI0409 | slI0586 | slI0587 |
| slI1158 | slI1159  | slI1325 | slI1326 | slr1124 | slr1125 | slr0105 | slr0106 |
| slr0737 | slr1655  | slr1821 | slr1822 | slI1294 | slI1296 | slr1186 | slr1187 |
| slr1593 | slr1594  | slI0135 | slI0136 | slr0530 | slr0531 | slI1324 | slI1325 |
| slI1186 | slI1187  | slI1371 | slI1372 | slr1860 | slr1861 | slr0604 | slr0605 |
| slI7064 | slI7065  | slI1025 | ssl1972 | slI1057 | slI1058 | slr1392 | ssr2333 |
| slI0410 | slI0412  | slr1208 | slr1209 | slr1468 | smr0011 | slI1623 | slI1624 |
| slI0776 | slI1528  | slI7033 | slI7034 | slr0092 | slr0093 | slr0904 | slr0905 |
| slI1822 | ssl3445  | slr0043 | slr0044 | slI0650 | slI0651 | slr0780 | smr0001 |
| slI0098 | slI0099  | slI1078 | slI1079 | slI0317 | slI1255 | slI1888 | ssl3549 |
| slr0704 | ssr1176  | slr2107 | slr2108 | slr0489 | slr0491 | slr6042 | slr6043 |
| slr1783 | slr1784  | slr0331 | slr1291 | slr0680 | slr0681 | slI1537 | slI1538 |
| slI1252 | slI1253  | slr1881 | ssr3184 | slI0508 | slI0509 | slr0804 | slr0806 |
| slr1672 | slr1673  | slr6074 | slr6075 | slr0918 | slr0919 | slr5017 | slr5018 |
| slI1749 | slI1749a | slI1393 | slI1394 | slI1749 | slI1750 | slr1986 | slr2067 |
| slr1885 | ssr3189  | slI1732 | slI1733 | slr1376 | slr1377 | slr0833 | ssr1407 |
| slr0743 | slr0743a | slI1878 | slI1879 | slr0667 | slr0668 | slI1446 | slI1447 |
| slI1254 | slI1255  | slI0775 | slI0776 | slI0041 | slI0042 | slI1521 | slI1522 |
| slr6095 | slr6096  | slI0244 | slI0245 | slr1854 | slr1855 | slr6056 | slr6057 |
| slI0761 | slI0762  | slr0697 | slr0698 | slI1532 | ssl2982 | slr2058 | slr2059 |
| slI1941 | slI1942  | slI0222 | slI0223 | slI5047 | slI5048 | slr5023 | slr5024 |
| slr2113 | slr2114  | slI0524 | ssl1004 | slI0595 | slI0596 | slI0066 | slI0067 |
| slI0710 | slI0711  | slr1453 | ssr2439 | slr0951 | slr0952 | slI5059 | slI5060 |
| slr1803 | slr2144  | slI1807 | slI1808 | slr0533 | slr0534 |         |         |
| slI2008 | slI2009  | slI0264 | slI1869 | slI0901 | slI0902 |         |         |
| slr0775 | slr0776  | slI0572 | slI0573 | slI0397 | slI0398 |         |         |

**Supplemental Table S4. Primers used for yeast two-hybrid experiments.**

| <b>Name</b> | <b>Primer sequence (5'-3')</b>    |
|-------------|-----------------------------------|
| ndhA-FP     | CGGAATTCATGACTTCAGGCATTGATCTTCAG  |
| ndhA-RP     | CCCCTCGAGCTAACCGCCAAAGGCCATGGGAAA |
| ndhB-FR     | CCCCTCGAGATGGACTTTTCTAGTAACGTTGCA |
| ndhB-RR     | CCCCTCGAGCTAGGGTAAATCATGGGAAATGGC |
| ndhH-FP     | CCCCTCGAGATGCCGCCTTGCCTCCCAATGGC  |
| ndhH-RP     | CCCCTCGAGCTAGCGGTCCACCGATCCCATGAT |
| ndhI-FP     | CCCCTCGAGATGTTTAACAACATTCTCAAACAG |
| ndhI-RP     | CCCCTCGAGCTATTCTGCTTTCACCAAATCTTC |
| ndhJ-FP     | CGGAATTCGTGGCTGAGGAAGTGAACCTCCCC  |
| ndhJ-RP     | CCCCTCGAGCTAATAGGCATCCTGGAGTTCGTA |
| ndhK-FP     | CGGAATTCATGAGTCCCAACCCTGCTAACCCC  |
| ndhK-RP     | CCCCTCGAGTCAGCCACGGTTTAATTGCTCCTT |
| ndhO-FP     | CGGAATTCATGGCCGCTAAAATGAAAAAGG    |
| ndhO-RP     | CCCCTCGAGCTAAGCCAGGGCTTCGATTTGG   |

**Supplementary Table S5** Literature verification of predicted PPIs.

| <b>Pubmed ID</b> | <b>Protein A</b> | <b>Protein B</b> | <b>Experiments</b> |
|------------------|------------------|------------------|--------------------|
| 19843617         | slr1644          | slr0506          | Y2H                |
| 12966069         | slr1098          | slr1565          | Y2H                |
| 9418040          | slr1777          | slr1030          | Y2H                |
| 19542180         | sll0698          | ssl3451          | Y2H                |
| 17921338         | sll1867          | sml0001          | Y2H                |
| 17921338         | slr1311          | sml0001          | Y2H                |
| 17921338         | slr1181          | sml0001          | Y2H                |
| 15328351         | sll1867          | slr1311          | Y2H                |
| 12232386         | slr0737          | slr1655          | Y2H                |
| 12232386         | ssr2831          | sll0819          | Y2H                |
| 21642457         | sll0359          | sll0822          | Y2H                |
| 16109709         | sll0985          | ssl0707          | Y2H                |
| 14730074         | slr0342          | slr0343          | Y2H                |
| 14730074         | sll1327          | sll1326          | Y2H                |
| 14730074         | sll1735          | sll1734          | Y2H                |
| 14730074         | sll1326          | sll1325          | Y2H                |
| 11532008         | slr0473          | slr0474          | Y2H                |
| 8325373          | slr1280          | slr1281          | Y2H                |
| 15262969         | slr1185          | sll1316          | 2MUTANT            |
| 10906128         | slr0331          | slr1291          | 2MUTANT            |
| 16049785         | slr2051          | sll1471          | 2MUTANT            |
| 11562454         | sll1733          | sll0027          | 2MUTANT            |
| 9211937          | sll0258          | sll1194          | 2MUTANT            |
| 7548017          | sll0258          | sll0427          | 2MUTANT            |
| 16002996         | slr1693          | slr1694          | Y2H                |



**Supplementary Table S6 Functional assignment for function-unknown proteins.**

|         |            |       |         |            |       |         |            |       |         |            |       |         |            |        |
|---------|------------|-------|---------|------------|-------|---------|------------|-------|---------|------------|-------|---------|------------|--------|
| slr0299 | G0:0072524 | <1e-4 | slr0317 | G0:0048522 | <1e-4 | slr1260 | G0:0043436 | <1e-4 | slr1737 | G0:0015291 | <1e-4 | ssr3341 | G0:0016020 | 0.3576 |
| slr1906 | G0:0006793 | <1e-4 | slr7099 | G0:0008150 | <1e-4 | slr0503 | G0:0043436 | <1e-4 | slr1062 | G0:0015291 | <1e-4 | slr1097 | G0:0016020 | 0.3576 |
| sl11609 | G0:0051716 | <1e-4 | ssr5092 | G0:0009142 | <1e-4 | slr0613 | G0:0006793 | <1e-4 | sl15132 | G0:0015267 | <1e-4 | slr1407 | G0:0016020 | 0.3576 |
| ssr2615 | G0:0022411 | <1e-4 | sl11632 | G0:0019637 | <1e-4 | slr6101 | G0:0009893 | <1e-4 | ssr2962 | G0:0022891 | <1e-4 | sl11132 | G0:0016020 | 0.3576 |
| sl10022 | G0:0019222 | <1e-4 | sl10793 | G0:0022607 | <1e-4 | ssr2962 | G0:0043549 | <1e-4 | slr6008 | G0:0015293 | <1e-4 | sl16054 | G0:0016020 | 0.3576 |
| slr0053 | G0:0006793 | <1e-4 | ss15064 | G0:0031326 | <1e-4 | sl10487 | G0:0009132 | <1e-4 | sl10749 | G0:0016462 | <1e-4 | sl10400 | G0:0016020 | 0.3576 |
| slr0981 | G0:0009132 | <1e-4 | slr1563 | G0:0044282 | <1e-4 | sl10930 | G0:0051171 | <1e-4 | sl10141 | G0:0016741 | <1e-4 | slr7023 | G0:0016020 | 0.3576 |
| ssr5121 | G0:0044260 | <1e-4 | slr1644 | G0:0046128 | <1e-4 | slr7025 | G0:0009126 | <1e-4 | slr1437 | G0:0016462 | <1e-4 | sl11853 | G0:0016020 | 0.3576 |
| slr0304 | G0:0080090 | <1e-4 | slr1169 | G0:0006091 | <1e-4 | ssr1375 | G0:0006091 | <1e-4 | sl11902 | G0:0022838 | <1e-4 | sl10167 | G0:0016020 | 0.3576 |
| sl15030 | G0:0044282 | <1e-4 | ss13382 | G0:0043412 | <1e-4 | ss15007 | G0:0052188 | <1e-4 | slr6103 | G0:0022892 | <1e-4 | sl10863 | G0:0016020 | 0.3576 |
| slr7037 | G0:0006732 | <1e-4 | sl11002 | G0:0072524 | <1e-4 | sl10691 | G0:0044281 | <1e-4 | slr1143 | G0:0015291 | <1e-4 | slr1365 | G0:0016020 | 0.3576 |
| slr2105 | G0:0009057 | <1e-4 | ssr2317 | G0:0071496 | <1e-4 | sl10545 | G0:0042180 | <1e-4 | sl11880 | G0:0016741 | <1e-4 | sl10423 | G0:0016020 | 0.3576 |
| slr1150 | G0:0006576 | <1e-4 | sl11608 | G0:0043648 | <1e-4 | slr6068 | G0:0071554 | <1e-4 | slr1778 | G0:0015075 | <1e-4 | sl11880 | G0:0016020 | 0.3576 |
| slr1505 | G0:0051188 | <1e-4 | slr7011 | G0:0051188 | <1e-4 | ssr5121 | G0:0055114 | <1e-4 | ssr2787 | G0:0022892 | <1e-4 | ss10312 | G0:0016020 | 0.3576 |
| ssr2009 | G0:0009124 | <1e-4 | slr1547 | G0:0009263 | <1e-4 | ss10353 | G0:0071496 | <1e-4 | sl10361 | G0:0042623 | <1e-4 | slr1468 | G0:0016020 | 0.3576 |
| sl10639 | G0:0006766 | <1e-4 | sl10888 | G0:0071496 | <1e-4 | sl10793 | G0:0019637 | <1e-4 | slr2048 | G0:0016746 | <1e-4 | sl18032 | G0:0016020 | 0.3576 |
| ssr5019 | G0:0009132 | <1e-4 | sl10780 | G0:0010468 | <1e-4 | ssr3189 | G0:0045184 | <1e-4 | sl18007 | G0:0022836 | <1e-4 | sl15046 | G0:0016020 | 0.3576 |
| sl11233 | G0:0006721 | <1e-4 | sl10995 | G0:0045184 | <1e-4 | ss15114 | G0:0006811 | <1e-4 | sl11505 | G0:0008171 | <1e-4 | sl11766 | G0:0016020 | 0.3576 |
| slr1053 | G0:0009059 | <1e-4 | sl10218 | G0:0009308 | <1e-4 | sl11995 | G0:0051186 | <1e-4 | slr1365 | G0:0016741 | <1e-4 | sl11414 | G0:0016020 | 0.3576 |
| ss13692 | G0:0080090 | <1e-4 | sl10444 | G0:0009142 | <1e-4 | slr1240 | G0:0001932 | <1e-4 | sl11853 | G0:0042623 | <1e-4 | slr5119 | G0:0016020 | 0.3576 |
| slr1307 | G0:0044106 | <1e-4 | slr0476 | G0:0044283 | <1e-4 | sl10854 | G0:0019219 | <1e-4 | sl12013 | G0:0015405 | <1e-4 | slr1035 | G0:0016020 | 0.3576 |
| slr0192 | G0:0071840 | <1e-4 | slr1436 | G0:0009132 | <1e-4 | sl10670 | G0:0043170 | <1e-4 | slr0482 | G0:0043167 | <1e-4 | ss12245 | G0:0016020 | 0.3576 |
| sl10846 | G0:0010556 | <1e-4 | sl11267 | G0:0044003 | <1e-4 | sl10286 | G0:0051186 | <1e-4 | slr1206 | G0:0022803 | <1e-4 | sl10658 | G0:0016020 | 0.3576 |
| slr1519 | G0:0044255 | <1e-4 | slr0207 | G0:0009987 | <1e-4 | slr1122 | G0:0051171 | <1e-4 | slr0581 | G0:0042623 | <1e-4 | sl11155 | G0:0016020 | 0.3576 |
| ss17039 | G0:0055114 | <1e-4 | slr0609 | G0:0019219 | <1e-4 | sl10487 | G0:0031323 | <1e-4 | sl11135 | G0:0015077 | <1e-4 | sl11273 | G0:0016020 | 0.3576 |
| sl11784 | G0:0006766 | <1e-4 | sl10765 | G0:0071841 | <1e-4 | ss15100 | G0:0006082 | <1e-4 | ss15100 | G0:0005342 | <1e-4 | slr7015 | G0:0016020 | 0.3576 |
| sl11350 | G0:0010556 | <1e-4 | sl11950 | G0:0060255 | <1e-4 | slr0503 | G0:0031323 | <1e-4 | slr0388 | G0:0043492 | <1e-4 | sl10063 | G0:0016020 | 0.3576 |
| slr0978 | G0:0006721 | <1e-4 | sl10614 | G0:0065007 | <1e-4 | sl10496 | G0:0006163 | <1e-4 | slr1303 | G0:0008171 | <1e-4 | sl11461 | G0:0016020 | 0.3576 |
| slr0912 | G0:0045184 | <1e-4 | slr1603 | G0:0072522 | <1e-4 | ssr5106 | G0:0019637 | <1e-4 | ss15108 | G0:0015399 | <1e-4 | slr1068 | G0:0016020 | 0.3576 |
| slr1854 | G0:0034654 | <1e-4 | ss15096 | G0:0034660 | <1e-4 | sl11022 | G0:0009126 | <1e-4 | slr1900 | G0:0022890 | <1e-4 | sl10630 | G0:0016020 | 0.3576 |
| ssr2781 | G0:0042180 | <1e-4 | sl11447 | G0:0065007 | <1e-4 | sl11681 | G0:0043436 | <1e-4 | slr0386 | G0:0015077 | <1e-4 | sl10872 | G0:0016020 | 0.3576 |
| slr1273 | G0:0006811 | <1e-4 | ss12814 | G0:0051716 | <1e-4 | slr1084 | G0:0009892 | <1e-4 | sl11396 | G0:0022838 | <1e-4 | slr0148 | G0:0016020 | 0.3576 |
| sl11925 | G0:0051186 | <1e-4 | sl10238 | G0:0071554 | <1e-4 | sl10272 | G0:0006766 | <1e-4 | slr6100 | G0:0003674 | <1e-4 | slr1161 | G0:0016020 | 0.3576 |
| slr1865 | G0:0050896 | <1e-4 | slr0169 | G0:0009165 | <1e-4 | slr6049 | G0:0043170 | <1e-4 | ss15068 | G0:0022838 | <1e-4 | ss11792 | G0:0016020 | 0.3576 |
| ss13692 | G0:0008150 | <1e-4 | slr1273 | G0:0019222 | <1e-4 | slr0871 | G0:0050794 | <1e-4 | sl11940 | G0:0003674 | <1e-4 | sl10994 | G0:0016020 | 0.3576 |
| slr0313 | G0:0019751 | <1e-4 | slr1726 | G0:0055086 | <1e-4 | slr1566 | G0:0046164 | <1e-4 | slr7094 | G0:0022892 | <1e-4 | sl11764 | G0:0016020 | 0.3576 |
| slr6081 | G0:0018130 | <1e-4 | sl10933 | G0:0050794 | <1e-4 | sl10325 | G0:0006220 | <1e-4 | sl10858 | G0:0016746 | <1e-4 | slr6073 | G0:0016020 | 0.3576 |
| slr0848 | G0:0048523 | <1e-4 | slr1926 | G0:0072524 | <1e-4 | sl11068 | G0:0019222 | <1e-4 | sl15044 | G0:0016462 | <1e-4 | slr0388 | G0:0016020 | 0.3576 |
| sl11735 | G0:0031326 | <1e-4 | slr6065 | G0:0019637 | <1e-4 | sl10445 | G0:0051246 | <1e-4 | sl11660 | G0:0016818 | <1e-4 | slr6065 | G0:0016020 | 0.3576 |
| sl10253 | G0:0044282 | <1e-4 | slr0876 | G0:0006066 | <1e-4 | slr0709 | G0:0009889 | <1e-4 | sl11289 | G0:0008171 | <1e-4 | slr1619 | G0:0016020 | 0.3576 |
| sl10024 | G0:0006066 | <1e-4 | sl11273 | G0:0008610 | <1e-4 | slr6033 | G0:0006576 | <1e-4 | slr1907 | G0:0022838 | <1e-4 | slr1162 | G0:0016020 | 0.3576 |
| slr6068 | G0:0072528 | <1e-4 | slr1107 | G0:0009126 | <1e-4 | sl10168 | G0:0046394 | <1e-4 | slr1917 | G0:0015293 | <1e-4 | slr7083 | G0:0016020 | 0.3576 |
| sl10286 | G0:0006082 | <1e-4 | slr1376 | G0:0009144 | <1e-4 | slr1290 | G0:0046483 | <1e-4 | sl10188 | G0:0022857 | <1e-4 | sl11862 | G0:0016020 | 0.3576 |
| slr1415 | G0:0071554 | <1e-4 | ss11417 | G0:0043412 | <1e-4 | sl10048 | G0:0051188 | <1e-4 | ss15098 | G0:0003674 | <1e-4 | ss12920 | G0:0016020 | 0.3576 |
| ssr3410 | G0:0051188 | <1e-4 | ssr0657 | G0:0071841 | <1e-4 | slr2119 | G0:0044282 | <1e-4 | slr0645 | G0:0016818 | <1e-4 | sl10710 | G0:0016020 | 0.3576 |
| sl10853 | G0:0009308 | <1e-4 | sl10630 | G0:0006733 | <1e-4 | sl12006 | G0:0044260 | <1e-4 | sl10585 | G0:0043167 | <1e-4 | slr1069 | G0:0016020 | 0.3576 |
| slr0590 | G0:0016054 | <1e-4 | ss10788 | G0:0008150 | <1e-4 | slr6080 | G0:0080090 | <1e-4 | sl10696 | G0:0003674 | <1e-4 | slr1472 | G0:0016020 | 0.3576 |
| sl10847 | G0:0006220 | <1e-4 | sl11446 | G0:0010556 | <1e-4 | slr6008 | G0:0010556 | <1e-4 | sl11532 | G0:0022892 | <1e-4 | sl11004 | G0:0016020 | 0.3576 |
| slr0358 | G0:0001932 | <1e-4 | ssr2009 | G0:0009262 | <1e-4 | slr0380 | G0:0006082 | <1e-4 | ssr5121 | G0:0042623 | <1e-4 | slr1270 | G0:0016020 | 0.3576 |
| slr1241 | G0:0009263 | <1e-4 | slr1033 | G0:0052111 | <1e-4 | slr0476 | G0:0044260 | <1e-4 | sl11192 | G0:0016746 | <1e-4 | slr1363 | G0:0016020 | 0.3576 |
| ss11300 | G0:0044248 | <1e-4 | sl17067 | G0:0009991 | <1e-4 | sl10325 | G0:0046394 | <1e-4 | ssr2998 | G0:0015077 | <1e-4 | sl15032 | G0:0016020 | 0.3576 |
| slr0148 | G0:0009199 | <1e-4 | sl11130 | G0:0044283 | <1e-4 | sl10424 | G0:0050789 | <1e-4 | slr1240 | G0:0016462 | <1e-4 | slr0393 | G0:0016020 | 0.3576 |
| sl10909 | G0:0052111 | <1e-4 | slr0962 | G0:0009262 | <1e-4 | slr0634 | G0:0010468 | <1e-4 | slr1956 | G0:0022803 | <1e-4 | slr1378 | G0:0016020 | 0.3576 |

|         |            |       |         |            |       |         |            |       |         |            |       |         |            |        |
|---------|------------|-------|---------|------------|-------|---------|------------|-------|---------|------------|-------|---------|------------|--------|
| sl10160 | G0:0018130 | <1e-4 | sl11797 | G0:0009987 | <1e-4 | slr1812 | G0:0051186 | <1e-4 | slr0586 | G0:0016741 | <1e-4 | slr0145 | G0:0016020 | 0.3576 |
| ssl3829 | G0:0006732 | <1e-4 | slr2049 | G0:0072521 | <1e-4 | slr7095 | G0:0031640 | <1e-4 | ssr6089 | G0:0003674 | <1e-4 | ssr6003 | G0:0016020 | 0.3576 |
| slr1959 | G0:0009150 | <1e-4 | sl11106 | G0:0006811 | <1e-4 | slr1790 | G0:0001932 | <1e-4 | sl15030 | G0:0022891 | <1e-4 | sl10436 | G0:0016020 | 0.3576 |
| sl11186 | G0:0048518 | <1e-4 | sl10098 | G0:0006082 | <1e-4 | slr0408 | G0:0009124 | <1e-4 | slr0668 | G0:0015399 | <1e-4 | sl10815 | G0:0016020 | 0.3576 |
| sl11681 | G0:0009132 | <1e-4 | sl10406 | G0:0043436 | <1e-4 | sl11873 | G0:0072521 | <1e-4 | ssr5092 | G0:0043167 | <1e-4 | sl11396 | G0:0016020 | 0.3576 |
| sl10980 | G0:0046164 | <1e-4 | slr1186 | G0:0050794 | <1e-4 | slr1753 | G0:0050789 | <1e-4 | sl11722 | G0:0022836 | <1e-4 | slr0959 | G0:0016020 | 0.3576 |
| slr0980 | G0:0008610 | <1e-4 | slr1864 | G0:0009056 | <1e-4 | slr1441 | G0:0031323 | <1e-4 | sl10180 | G0:0008171 | <1e-4 | slr1484 | G0:0016020 | 0.3576 |
| ssr2047 | G0:0005996 | <1e-4 | sl17065 | G0:0016052 | <1e-4 | slr1301 | G0:0044003 | <1e-4 | slr0516 | G0:0022857 | <1e-4 | sl15062 | G0:0016020 | 0.3576 |
| slr1544 | G0:0009262 | <1e-4 | sl10068 | G0:0060255 | <1e-4 | sl18032 | G0:0080090 | <1e-4 | ssr7035 | G0:0043492 | <1e-4 | slr1116 | G0:0016020 | 0.3576 |
| slr1327 | G0:0042455 | <1e-4 | sl11381 | G0:0009126 | <1e-4 | sl10639 | G0:0043170 | <1e-4 | slr0981 | G0:0022803 | <1e-4 | slr1566 | G0:0016020 | 0.3576 |
| slr1956 | G0:0044248 | <1e-4 | sl10174 | G0:0044003 | <1e-4 | ss17021 | G0:0009263 | <1e-4 | sl10781 | G0:0015267 | <1e-4 | slr0179 | G0:0016020 | 0.3576 |
| slr2011 | G0:0008150 | <1e-4 | slr5013 | G0:0009394 | <1e-4 | slr0476 | G0:0006811 | <1e-4 | sl10702 | G0:0015077 | <1e-4 | slr7095 | G0:0016020 | 0.3576 |
| slr1616 | G0:0048518 | <1e-4 | ssr1155 | G0:0006091 | <1e-4 | sl15033 | G0:0044003 | <1e-4 | slr0147 | G0:0022838 | <1e-4 | sl15034 | G0:0016020 | 0.3576 |
| sl10984 | G0:0034654 | <1e-4 | ss10739 | G0:0044255 | <1e-4 | slr0317 | G0:0044255 | <1e-4 | ss11690 | G0:0016746 | <1e-4 | sl11130 | G0:0016020 | 0.3576 |
| slr1557 | G0:0042180 | <1e-4 | sl10023 | G0:0043933 | <1e-4 | ssr1391 | G0:0043549 | <1e-4 | sl10925 | G0:0043492 | <1e-4 | ssr0332 | G0:0016020 | 0.3576 |
| slr7071 | G0:0006766 | <1e-4 | sl11510 | G0:0046394 | <1e-4 | sl11542 | G0:0072527 | <1e-4 | ss17007 | G0:0060089 | <1e-4 | sl10518 | G0:0016020 | 0.3576 |
| slr0505 | G0:0006720 | <1e-4 | sl11401 | G0:0044271 | <1e-4 | ss11918 | G0:0006066 | <1e-4 | slr0890 | G0:0016817 | <1e-4 | sl11166 | G0:0008152 | 0.3466 |
| ssr7093 | G0:0051179 | <1e-4 | slr6081 | G0:0009263 | <1e-4 | slr0059 | G0:0019222 | <1e-4 | sl11036 | G0:0015291 | <1e-4 | sl11247 | G0:0008152 | 0.3466 |
| sl10981 | G0:0050801 | <1e-4 | sl11541 | G0:0006811 | <1e-4 | ssr7093 | G0:0009126 | <1e-4 | slr2121 | G0:0022832 | <1e-4 | slr1533 | G0:0008152 | 0.3466 |
| slr0967 | G0:0009309 | <1e-4 | sl11477 | G0:0050801 | <1e-4 | sl10062 | G0:0043648 | <1e-4 | sl11722 | G0:0016462 | <1e-4 | ssr1375 | G0:0008152 | 0.3466 |
| slr7060 | G0:0008610 | <1e-4 | slr0142 | G0:0006066 | <1e-4 | slr1566 | G0:0048519 | <1e-4 | slr0404 | G0:0022857 | <1e-4 | slr1034 | G0:0008152 | 0.3466 |
| sl11461 | G0:0006811 | <1e-4 | ssr7084 | G0:0051234 | <1e-4 | sg10002 | G0:0009161 | <1e-4 | sl10995 | G0:0015399 | <1e-4 | sl11060 | G0:0008152 | 0.3466 |
| slr0272 | G0:0065007 | <1e-4 | slr0590 | G0:0009144 | <1e-4 | sl11995 | G0:0034654 | <1e-4 | sl18032 | G0:0008171 | <1e-4 | slr1900 | G0:0008152 | 0.3466 |
| sl10590 | G0:0009126 | <1e-4 | ssr2787 | G0:0033013 | <1e-4 | slr0059 | G0:0034660 | <1e-4 | slr1288 | G0:0043167 | <1e-4 | ssr1698 | G0:0008152 | 0.3466 |
| slr8014 | G0:0008150 | <1e-4 | sl17089 | G0:0006720 | <1e-4 | sl10405 | G0:0022411 | <1e-4 | slr0789 | G0:0005342 | <1e-4 | sl10360 | G0:0008152 | 0.3466 |
| slr1074 | G0:0044282 | <1e-4 | sl11651 | G0:0044283 | <1e-4 | slr1116 | G0:0072521 | <1e-4 | slr1851 | G0:0016741 | <1e-4 | slr1107 | G0:0008152 | 0.3466 |
| slr1726 | G0:0048518 | <1e-4 | slr1413 | G0:0044003 | <1e-4 | slr0491 | G0:0046907 | <1e-4 | ssl3829 | G0:0015405 | <1e-4 | sl10499 | G0:0008152 | 0.3466 |
| slr1082 | G0:0008150 | <1e-4 | slr0092 | G0:0051179 | <1e-4 | slr0579 | G0:0048522 | <1e-4 | slr0637 | G0:0015267 | <1e-4 | sl11715 | G0:0008152 | 0.3466 |
| sl11049 | G0:0009263 | <1e-4 | slr2012 | G0:0051179 | <1e-4 | slr1676 | G0:0009161 | <1e-4 | slr0655 | G0:0022803 | <1e-4 | sl10096 | G0:0008152 | 0.3466 |
| ssr2553 | G0:0009991 | <1e-4 | slr1437 | G0:0051171 | <1e-4 | slr1429 | G0:0060255 | <1e-4 | ssr3571 | G0:0005342 | <1e-4 | ssr3532 | G0:0008152 | 0.3466 |
| sl10505 | G0:0009150 | <1e-4 | ssr1391 | G0:0050789 | <1e-4 | sl11654 | G0:0009059 | <1e-4 | slr0592 | G0:0022890 | <1e-4 | sl10274 | G0:0008152 | 0.3466 |
| slr1073 | G0:0016053 | <1e-4 | slr1084 | G0:0080090 | <1e-4 | slr1659 | G0:0055082 | <1e-4 | slr0392 | G0:0015267 | <1e-4 | slr0305 | G0:0008152 | 0.3466 |
| sl10552 | G0:0051716 | <1e-4 | slr0489 | G0:0044283 | <1e-4 | slr1071 | G0:0006066 | <1e-4 | slr7015 | G0:0003674 | <1e-4 | slr1083 | G0:0008152 | 0.3466 |
| sl11658 | G0:0006811 | <1e-4 | sl10847 | G0:0046128 | <1e-4 | slr6049 | G0:0046128 | <1e-4 | slr1235 | G0:0022891 | <1e-4 | slr1896 | G0:0008152 | 0.3466 |
| slr6072 | G0:0065007 | <1e-4 | slr2120 | G0:0005996 | <1e-4 | slr1613 | G0:0009892 | <1e-4 | sl17034 | G0:0043167 | <1e-4 | sl11671 | G0:0008152 | 0.3466 |
| slr1186 | G0:0009893 | <1e-4 | slr1657 | G0:0031640 | <1e-4 | ssr3402 | G0:0006793 | <1e-4 | sl10198 | G0:0022891 | <1e-4 | ss10109 | G0:0008152 | 0.3466 |
| sl10981 | G0:0009987 | <1e-4 | sl11123 | G0:0065007 | <1e-4 | slr1644 | G0:0044267 | <1e-4 | sl11252 | G0:0022857 | <1e-4 | slr1194 | G0:0008152 | 0.3466 |
| slr0108 | G0:0043549 | <1e-4 | sl10103 | G0:0009987 | <1e-4 | slr0586 | G0:0044255 | <1e-4 | sl15130 | G0:0042623 | <1e-4 | slr1127 | G0:0008152 | 0.3466 |
| ss15103 | G0:0048878 | <1e-4 | slr0270 | G0:0009142 | <1e-4 | slr6013 | G0:0071554 | <1e-4 | sl11006 | G0:0022892 | <1e-4 | sl10996 | G0:0008152 | 0.3466 |
| slr1926 | G0:0009263 | <1e-4 | slr1670 | G0:0019752 | <1e-4 | sl10742 | G0:0006732 | <1e-4 | slr1472 | G0:0022892 | <1e-4 | slr1074 | G0:0008152 | 0.3414 |
| ssr2998 | G0:0022607 | <1e-4 | slr1362 | G0:0006733 | <1e-4 | sl10157 | G0:0072527 | <1e-4 | slr1442 | G0:0015399 | <1e-4 | sl10281 | G0:0008152 | 0.3414 |
| slr0285 | G0:0046907 | <1e-4 | slr7073 | G0:0044271 | <1e-4 | slr1266 | G0:0051347 | <1e-4 | slr7011 | G0:0016741 | <1e-4 | sl10669 | G0:0008152 | 0.3414 |
| slr7095 | G0:0009309 | <1e-4 | slr0111 | G0:0031326 | <1e-4 | slr1926 | G0:0019752 | <1e-4 | slr0209 | G0:0022890 | <1e-4 | sl10909 | G0:0008152 | 0.3414 |
| ss12065 | G0:0019751 | <1e-4 | slr0144 | G0:0044281 | <1e-4 | slr0291 | G0:0044248 | <1e-4 | sl10447 | G0:0022836 | <1e-4 | sl11659 | G0:0008152 | 0.3414 |
| sl10372 | G0:0043436 | <1e-4 | sl11469 | G0:0009263 | <1e-4 | slr0013 | G0:0031640 | <1e-4 | sl17033 | G0:0005342 | <1e-4 | sl11173 | G0:0008152 | 0.3414 |
| ssr3572 | G0:0009144 | <1e-4 | sl18004 | G0:0006091 | <1e-4 | slr0876 | G0:0052111 | <1e-4 | sl10263 | G0:0015399 | <1e-4 | sl10980 | G0:0008152 | 0.3414 |
| sl10192 | G0:0006753 | <1e-4 | slr7098 | G0:0019222 | <1e-4 | sl10405 | G0:0009308 | <1e-4 | sl10847 | G0:0042623 | <1e-4 | sl10156 | G0:0008152 | 0.3414 |
| sl10069 | G0:0009165 | <1e-4 | slr1472 | G0:0051818 | <1e-4 | slr6074 | G0:0044106 | <1e-4 | sl10996 | G0:0022832 | <1e-4 | sl10503 | G0:0008152 | 0.3414 |
| sl11217 | G0:0008150 | <1e-4 | slr7059 | G0:0006720 | <1e-4 | sl11355 | G0:0044271 | <1e-4 | slr1547 | G0:0016741 | <1e-4 | slr0924 | G0:0008152 | 0.3414 |
| slr6049 | G0:0050801 | <1e-4 | slr0935 | G0:0006576 | <1e-4 | sl11036 | G0:0034654 | <1e-4 | ss17007 | G0:0022891 | <1e-4 | ssr1528 | G0:0008152 | 0.3414 |
| sl11853 | G0:0090304 | <1e-4 | slr0304 | G0:0044271 | <1e-4 | slr0517 | G0:0006576 | <1e-4 | sl10314 | G0:0003674 | <1e-4 | sl10740 | G0:0008152 | 0.3414 |
| sl11696 | G0:0010468 | <1e-4 | sl10487 | G0:0042455 | <1e-4 | sl11061 | G0:0071840 | <1e-4 | slr1173 | G0:0022892 | <1e-4 | slr1071 | G0:0008152 | 0.3414 |
| slr0731 | G0:0019637 | <1e-4 | sl11736 | G0:0065007 | <1e-4 | slr5077 | G0:0009132 | <1e-4 | sl11660 | G0:0060089 | <1e-4 | sl11634 | G0:0008152 | 0.3414 |
| slr1406 | G0:0046164 | <1e-4 | slr1104 | G0:0009161 | <1e-4 | sl10843 | G0:0019222 | <1e-4 | ss12009 | G0:0022890 | <1e-4 | sm10011 | G0:0008152 | 0.3414 |

slr0740 G0:0048518 <1e-4 ssl0352 G0:0009142 <1e-4 slr0294 G0:0009987 <1e-4 sl11158 G0:0015075 <1e-4 sl11399 G0:0008152 0.3414  
sl10584 G0:0009394 <1e-4 sl11658 G0:0048523 <1e-4 slr0960 G0:0022607 <1e-4 slr5018 G0:0043492 <1e-4 sl10843 G0:0008152 0.3414  
sl11979 G0:0072528 <1e-4 slr2060 G0:0010468 <1e-4 slr0959 G0:0009309 <1e-4 sl15028 G0:0008171 <1e-4 sl11225 G0:0008152 0.3414  
sl10564 G0:0072522 <1e-4 slr1519 G0:0055114 <1e-4 ssl5095 G0:0008150 <1e-4 slr1471 G0:0008324 <1e-4 slr0789 G0:0008152 0.3414  
slr1210 G0:0043412 <1e-4 slr1612 G0:0046164 <1e-4 slr0702 G0:0009987 <1e-4 sl11858 G0:0005342 <1e-4 slr1128 G0:0008152 0.3414  
slr1495 G0:0006766 <1e-4 sl11095 G0:0009150 <1e-4 sssr6030 G0:0034641 <1e-4 slr2121 G0:0015405 <1e-4 sl10359 G0:0008152 0.3414  
ssr2912 G0:0009199 <1e-4 sl11472 G0:0006766 <1e-4 slr5101 G0:0044281 <1e-4 sssr1951 G0:0042623 <1e-4 sl11660 G0:0008152 0.3414  
sl10539 G0:0048878 <1e-4 sl11586 G0:0010556 <1e-4 slr1240 G0:0051347 <1e-4 sl10354 G0:0042623 <1e-4 sl11680 G0:0008152 0.3414  
sl10765 G0:0043436 <1e-4 sl11464 G0:0050896 <1e-4 sl11608 G0:0019752 <1e-4 slr1533 G0:0022891 <1e-4 slr0318 G0:0008152 0.3414  
slr0305 G0:0044260 <1e-4 slr1068 G0:0009165 <1e-4 ssg10002 G0:0009259 <1e-4 sss15008 G0:0016741 <1e-4 sl10688 G0:0008152 0.3414  
sl15006 G0:0071496 <1e-4 slr1546 G0:0009262 <1e-4 slr1260 G0:0042455 <1e-4 sl11749 G0:0016818 <1e-4 sl11372 G0:0008152 0.3414  
slr1306 G0:0034641 <1e-4 sl18001 G0:0006753 <1e-4 sssr1499 G0:0019362 <1e-4 slr0581 G0:0015293 <1e-4 slr0680 G0:0008152 0.3414  
ssl1498 G0:0044271 <1e-4 sl11960 G0:0065007 <1e-4 slr1547 G0:0051171 <1e-4 sl11119 G0:0022891 <1e-4 sl10911 G0:0008152 0.3414  
slr6051 G0:0071841 <1e-4 slr2060 G0:0010556 <1e-4 slr0039 G0:0019222 <1e-4 slr6051 G0:0022892 <1e-4 sl11925 G0:0008152 0.3414  
sl11355 G0:0022411 <1e-4 sssr2754 G0:0072521 <1e-4 slr0912 G0:0051188 <1e-4 slr0769 G0:0016746 <1e-4 sss10739 G0:0008152 0.3414  
ss12781 G0:0071842 <1e-4 sl10160 G0:0044255 <1e-4 sl11570 G0:0008150 <1e-4 sl10552 G0:0015399 <1e-4 slr1862 G0:0008152 0.3414  
sl11606 G0:0006220 <1e-4 sl10702 G0:0009309 <1e-4 slr7092 G0:0042180 <1e-4 slr0272 G0:0042623 <1e-4 slr0232 G0:0008152 0.3414  
slr1603 G0:0010468 <1e-4 sssr2551 G0:0043412 <1e-4 slr7071 G0:0080090 <1e-4 sssr0335 G0:0022892 <1e-4 slr0654 G0:0008152 0.3414  
slr1546 G0:0009165 <1e-4 sl10659 G0:0051188 <1e-4 sl18035 G0:0046164 <1e-4 slr2004 G0:0008171 <1e-4 slr0272 G0:0008152 0.3414  
sl12007 G0:0034660 <1e-4 slr0407 G0:0009132 <1e-4 slr0366 G0:0010468 <1e-4 sl11509 G0:0022836 <1e-4 slr1613 G0:0008152 0.3414  
slr0366 G0:0051347 <1e-4 slr0053 G0:0019219 <1e-4 slr0360 G0:0072527 <1e-4 sl11119 G0:0016817 <1e-4 sl11956 G0:0008152 0.3414  
slr1142 G0:0044282 <1e-4 slr7081 G0:0051188 <1e-4 slr0455 G0:0005996 <1e-4 sl10167 G0:0042623 <1e-4 sl11201 G0:0008152 0.3414  
ss17042 G0:0080090 <1e-4 slr2004 G0:0009161 <1e-4 slr0356 G0:0006793 <1e-4 slr0865 G0:0022836 <1e-4 slr1259 G0:0008152 0.3414  
slr1827 G0:0072528 <1e-4 sssr2912 G0:0008150 <1e-4 slr7092 G0:0048518 <1e-4 slr1425 G0:0022857 <1e-4 sl11950 G0:0008152 0.3414  
slr0554 G0:0009126 <1e-4 slr7024 G0:0048518 <1e-4 sl11477 G0:0060255 <1e-4 slr0960 G0:0015293 <1e-4 slr1383 G0:0008152 0.3414  
slr1196 G0:0006732 <1e-4 slr0491 G0:0009124 <1e-4 slr5013 G0:0044282 <1e-4 sss17074 G0:0015405 <1e-4 sl11072 G0:0008152 0.3414  
sl11192 G0:0034641 <1e-4 sss10483 G0:0046164 <1e-4 slr0642 G0:0009165 <1e-4 slr1339 G0:0016741 <1e-4 slr0455 G0:0008152 0.3414  
sl11632 G0:0051246 <1e-4 sss1255 G0:0044106 <1e-4 slr1737 G0:0033013 <1e-4 slr1307 G0:0022857 <1e-4 sl10614 G0:0008152 0.3414  
ssr6048 G0:0051234 <1e-4 sss17074 G0:0051347 <1e-4 slr1612 G0:0048518 <1e-4 sl10761 G0:0022891 <1e-4 sl10737 G0:0008152 0.3414  
slr1066 G0:0009889 <1e-4 slr1699 G0:0051234 <1e-4 sssr2803 G0:0044281 <1e-4 sl11040 G0:0005342 <1e-4 sl10309 G0:0008152 0.3361  
slr0784 G0:0006721 <1e-4 slr0103 G0:0055114 <1e-4 sl10810 G0:0009059 <1e-4 slr0654 G0:0016817 <1e-4 sssr3122 G0:0008152 0.3361  
slr1668 G0:0006732 <1e-4 slr0919 G0:0043933 <1e-4 sl17055 G0:0009059 <1e-4 sl11509 G0:0016741 <1e-4 sl11315 G0:0008152 0.3361  
sl11658 G0:0055086 <1e-4 slr6071 G0:0051246 <1e-4 sl11040 G0:0048878 <1e-4 slr1827 G0:0016817 <1e-4 sl11608 G0:0008152 0.3361  
ssr0657 G0:0043933 <1e-4 slr0423 G0:0051234 <1e-4 slr6005 G0:0009892 <1e-4 slr1813 G0:0022838 <1e-4 sl11530 G0:0008152 0.3361  
slr0270 G0:0009056 <1e-4 slr5024 G0:0051818 <1e-4 slr0483 G0:0019222 <1e-4 sss17042 G0:0015399 <1e-4 slr1230 G0:0008152 0.3361  
sl11763 G0:0009141 <1e-4 sl11024 G0:0009117 <1e-4 sssr6003 G0:0050896 <1e-4 sl10149 G0:0022890 <1e-4 slr0006 G0:0008152 0.3361  
sl11447 G0:0009141 <1e-4 sssr1391 G0:0043412 <1e-4 slr7058 G0:0009199 <1e-4 sss15065 G0:0015399 <1e-4 sssr2962 G0:0008152 0.3361  
slr0978 G0:0072521 <1e-4 sl10861 G0:0009259 <1e-4 sl10191 G0:0051171 <1e-4 sl11601 G0:0022832 <1e-4 sssr2551 G0:0008152 0.3361  
sl10625 G0:0051179 <1e-4 slr1638 G0:0034641 <1e-4 sssr3300 G0:0019751 <1e-4 sl10982 G0:0015267 <1e-4 slr1638 G0:0008152 0.3361  
slr1811 G0:0009259 <1e-4 slr0517 G0:0019362 <1e-4 sl10183 G0:0080090 <1e-4 slr0038 G0:0043492 <1e-4 sl10237 G0:0008152 0.3361  
sl11659 G0:0019637 <1e-4 slr1033 G0:0001932 <1e-4 sl10611 G0:0072521 <1e-4 sl17028 G0:0043167 <1e-4 sssr2439 G0:0008152 0.3361  
ss10312 G0:0009889 <1e-4 slr1880 G0:0022411 <1e-4 slr0249 G0:0072527 <1e-4 sl11660 G0:0008171 <1e-4 sl10023 G0:0008152 0.3361  
slr2004 G0:0060255 <1e-4 sl10625 G0:0055114 <1e-4 sss18008 G0:0043436 <1e-4 sl11315 G0:0016818 <1e-4 sl11658 G0:0008152 0.3361  
slr1865 G0:0050801 <1e-4 sss14147 G0:0006576 <1e-4 sssr1041 G0:0009260 <1e-4 sl10513 G0:0043167 <1e-4 sl11761 G0:0008152 0.3361  
slr6021 G0:0080090 <1e-4 slr1862 G0:0051818 <1e-4 slr1568 G0:0048519 <1e-4 sl17086 G0:0043167 <1e-4 slr0392 G0:0008152 0.3361  
slr1394 G0:0009259 <1e-4 slr7057 G0:0043170 <1e-4 slr0453 G0:0034641 <1e-4 sl11174 G0:0005342 <1e-4 slr1262 G0:0008152 0.3361  
sl11660 G0:0071554 <1e-4 sl10414 G0:0044283 <1e-4 sl10933 G0:0044275 <1e-4 sssr1951 G0:0043492 <1e-4 sl10703 G0:0008152 0.3361  
slr1918 G0:0006576 <1e-4 slr0869 G0:0009132 <1e-4 sss10352 G0:0016052 <1e-4 slr0263 G0:0016817 <1e-4 slr1073 G0:0008152 0.3361  
slr2073 G0:0046164 <1e-4 slr1807 G0:0042451 <1e-4 sssr2060 G0:0009124 <1e-4 sl11640 G0:0015399 <1e-4 sl10198 G0:0008152 0.3361  
sl10939 G0:0046483 <1e-4 sss10788 G0:0009057 <1e-4 sl10615 G0:0022607 <1e-4 slr1964 G0:0015293 <1e-4 slr1648 G0:0008152 0.3361  
ssr6099 G0:0051171 <1e-4 slr7082 G0:0006066 <1e-4 slr6016 G0:0044281 <1e-4 slr1570 G0:0022857 <1e-4 sl10355 G0:0008152 0.3361  
sl10804 G0:0045184 <1e-4 slr0789 G0:0051171 <1e-4 slr1613 G0:0048523 <1e-4 slr1911 G0:0016818 <1e-4 slr0770 G0:0008152 0.3361  
sl10156 G0:0045184 <1e-4 sl10443 G0:0009056 <1e-4 sssr6019 G0:0006811 <1e-4 sl10062 G0:0022803 <1e-4 sl11954 G0:0008152 0.3361  
sl11049 G0:0051186 <1e-4 slr1570 G0:0019219 <1e-4 slr6031 G0:0071842 <1e-4 sl11763 G0:0022857 <1e-4 sl11061 G0:0008152 0.3361

|          |            |       |         |            |       |          |            |       |          |            |       |          |            |        |
|----------|------------|-------|---------|------------|-------|----------|------------|-------|----------|------------|-------|----------|------------|--------|
| ssl7007  | G0:0051188 | <1e-4 | sll0786 | G0:0044282 | <1e-4 | ssr6079  | G0:0051171 | <1e-4 | sll1526  | G0:0005342 | <1e-4 | ssl1577  | G0:0008152 | 0.3361 |
| slr0980  | G0:0050801 | <1e-4 | slr7024 | G0:0050896 | <1e-4 | slr1203  | G0:0006793 | <1e-4 | slr1338  | G0:0022838 | <1e-4 | slr0386  | G0:0008152 | 0.3361 |
| slr0655  | G0:0009394 | <1e-4 | sll1906 | G0:0080090 | <1e-4 | sll0888  | G0:0019751 | <1e-4 | slr1215  | G0:0022890 | <1e-4 | slr2144  | G0:0008152 | 0.3361 |
| ssr1766  | G0:0009142 | <1e-4 | slr1033 | G0:0009142 | <1e-4 | slr1957  | G0:0006082 | <1e-4 | slr0923  | G0:0015075 | <1e-4 | sll0982  | G0:0008152 | 0.3361 |
| sll1853  | G0:0048878 | <1e-4 | slr7095 | G0:0052111 | <1e-4 | slr1752  | G0:0033013 | <1e-4 | slr0708  | G0:0022832 | <1e-4 | sll1273  | G0:0008152 | 0.3177 |
| sll0785  | G0:0044260 | <1e-4 | sll0762 | G0:0008150 | <1e-4 | ssll690  | G0:0048519 | <1e-4 | slr0725  | G0:0016818 | <1e-4 | sll5034  | G0:0008152 | 0.3177 |
| sll0168  | G0:0042451 | <1e-4 | sll0253 | G0:0009987 | <1e-4 | slr1638  | G0:0009124 | <1e-4 | slr1385  | G0:0016741 | <1e-4 | slr1397  | G0:0008152 | 0.3177 |
| sll6053  | G0:0006066 | <1e-4 | sll1601 | G0:0043436 | <1e-4 | slr0913  | G0:0042180 | <1e-4 | slr1173  | G0:0005342 | <1e-4 | slr6004  | G0:0008152 | 0.3177 |
| sll1348  | G0:0051716 | <1e-4 | slr6029 | G0:0051716 | <1e-4 | ssr6027  | G0:0031640 | <1e-4 | ssl5114  | G0:0043492 | <1e-4 | sg10001  | G0:0008152 | 0.3177 |
| sll5062  | G0:0006163 | <1e-4 | ssl1792 | G0:0050794 | <1e-4 | slr0801  | G0:0001932 | <1e-4 | slr0157  | G0:0016817 | <1e-4 | slr1276  | G0:0008152 | 0.3177 |
| sll0871  | G0:0022607 | <1e-4 | sll0858 | G0:0016054 | <1e-4 | sll0932  | G0:0034654 | <1e-4 | slr1186  | G0:0016746 | <1e-4 | sll1163  | G0:0008152 | 0.3177 |
| slr1789  | G0:0018130 | <1e-4 | slr0300 | G0:0031640 | <1e-4 | sll1164  | G0:0072528 | <1e-4 | sll0448  | G0:0043167 | <1e-4 | slr6008  | G0:0008152 | 0.3177 |
| sll0424  | G0:0006163 | <1e-4 | sll1186 | G0:0019637 | <1e-4 | ssl2920  | G0:0044281 | <1e-4 | sll0811  | G0:0022892 | <1e-4 | slr1814  | G0:0008152 | 0.3177 |
| slr1541  | G0:0034641 | <1e-4 | slr0082 | G0:0046164 | <1e-4 | slr1189  | G0:0044281 | <1e-4 | slr0907  | G0:0060089 | <1e-4 | slr1815  | G0:0008152 | 0.3177 |
| slr6047  | G0:0009987 | <1e-4 | ssr0332 | G0:0065007 | <1e-4 | sll11797 | G0:0071842 | <1e-4 | slr1431  | G0:0022838 | <1e-4 | ss10312  | G0:0008152 | 0.3177 |
| slr1956  | G0:0001932 | <1e-4 | sll7090 | G0:0019219 | <1e-4 | slr1603  | G0:0009991 | <1e-4 | sll1714  | G0:0042623 | <1e-4 | slr6038  | G0:0008152 | 0.3177 |
| sll0281  | G0:0006082 | <1e-4 | slr1638 | G0:0006066 | <1e-4 | sll0625  | G0:0016052 | <1e-4 | slr1468  | G0:0043492 | <1e-4 | sll0553  | G0:0008152 | 0.3177 |
| slr0211  | G0:0050789 | <1e-4 | sll1486 | G0:0052111 | <1e-4 | slr1519  | G0:0048523 | <1e-4 | sll1447  | G0:0043167 | <1e-4 | sll1162  | G0:0008152 | 0.3177 |
| sll0428  | G0:0072522 | <1e-4 | sll1004 | G0:0006066 | <1e-4 | sll1109  | G0:0006811 | <1e-4 | slr7082  | G0:0015399 | <1e-4 | slr6072  | G0:0008152 | 0.3177 |
| sll18012 | G0:0051171 | <1e-4 | slr0453 | G0:0046164 | <1e-4 | slr1270  | G0:0043549 | <1e-4 | sll0496  | G0:0015291 | <1e-4 | slr6063  | G0:0008152 | 0.3177 |
| ssr1375  | G0:0009144 | <1e-4 | sll5128 | G0:0044282 | <1e-4 | slr1260  | G0:0019752 | <1e-4 | ssl8028  | G0:0022836 | <1e-4 | slr6015  | G0:0008152 | 0.3177 |
| slr0151  | G0:0009308 | <1e-4 | sll0815 | G0:0052111 | <1e-4 | slr1275  | G0:0006066 | <1e-4 | sll0539  | G0:0016462 | <1e-4 | slr0489  | G0:0008152 | 0.3177 |
| sll1191  | G0:0006720 | <1e-4 | sll1611 | G0:0071496 | <1e-4 | slr5077  | G0:0009892 | <1e-4 | ssr2848  | G0:0015077 | <1e-4 | slr1576  | G0:0008152 | 0.3177 |
| slr7026  | G0:0044003 | <1e-4 | slr1431 | G0:0055082 | <1e-4 | ssl2245  | G0:0043170 | <1e-4 | slr6073  | G0:0022836 | <1e-4 | slr1470  | G0:0008152 | 0.3177 |
| slr0755  | G0:0071841 | <1e-4 | slr0689 | G0:0071841 | <1e-4 | sg10002  | G0:0001932 | <1e-4 | sll1880  | G0:0015293 | <1e-4 | slr7025  | G0:0008152 | 0.3177 |
| ssr3300  | G0:0009161 | <1e-4 | slr6073 | G0:0009394 | <1e-4 | sll5090  | G0:0009260 | <1e-4 | slr0742  | G0:0005342 | <1e-4 | slr0619  | G0:0008152 | 0.3177 |
| sll1698  | G0:0019222 | <1e-4 | slr5077 | G0:0072528 | <1e-4 | ssr6062  | G0:0019219 | <1e-4 | ssr7036  | G0:0022832 | <1e-4 | sll0369  | G0:0008152 | 0.3177 |
| ssl2814  | G0:0072522 | <1e-4 | sll1680 | G0:0009132 | <1e-4 | slr0060  | G0:0034641 | <1e-4 | slr0751  | G0:0015293 | <1e-4 | sll5130  | G0:0008152 | 0.3177 |
| sll11411 | G0:0052188 | <1e-4 | sll1510 | G0:0009161 | <1e-4 | slr0554  | G0:0016054 | <1e-4 | sll1092  | G0:0022836 | <1e-4 | sll0406  | G0:0008152 | 0.3177 |
| slr1659  | G0:0051179 | <1e-4 | sll0208 | G0:0031326 | <1e-4 | slr1384  | G0:0055082 | <1e-4 | ssr0759  | G0:0022892 | <1e-4 | sll0853  | G0:0008152 | 0.3177 |
| ssl2069  | G0:0006082 | <1e-4 | sll1240 | G0:0008610 | <1e-4 | sll0843  | G0:0006721 | <1e-4 | ssl5096  | G0:0016462 | <1e-4 | sll1092  | G0:0008152 | 0.3177 |
| sll7089  | G0:0009117 | <1e-4 | slr0400 | G0:0071840 | <1e-4 | slr1900  | G0:0090304 | <1e-4 | sll0518  | G0:0015399 | <1e-4 | slr0142  | G0:0008152 | 0.3177 |
| sll0996  | G0:0045184 | <1e-4 | slr0708 | G0:0048878 | <1e-4 | slr1178  | G0:0031640 | <1e-4 | sll1882  | G0:0016818 | <1e-4 | ssl3379  | G0:0008152 | 0.3177 |
| sll1834  | G0:0055082 | <1e-4 | sll7028 | G0:0046164 | <1e-4 | slr7073  | G0:0042180 | <1e-4 | sll0793  | G0:0008171 | <1e-4 | slr0869  | G0:0008152 | 0.3177 |
| slr6015  | G0:0043436 | <1e-4 | slr1699 | G0:0055082 | <1e-4 | ssr8047  | G0:0019752 | <1e-4 | slr1079  | G0:0003674 | <1e-4 | slr7011  | G0:0008152 | 0.3177 |
| sll0482  | G0:0019222 | <1e-4 | sll0518 | G0:0046907 | <1e-4 | slr1970  | G0:0009991 | <1e-4 | sll1062  | G0:0043492 | <1e-4 | slr1363  | G0:0008152 | 0.3177 |
| slr1474  | G0:0046907 | <1e-4 | slr0619 | G0:0043436 | <1e-4 | sll1239  | G0:0043412 | <1e-4 | sll0525  | G0:0022891 | <1e-4 | slr0058  | G0:0008152 | 0.3177 |
| slr7060  | G0:0019752 | <1e-4 | sll0498 | G0:0006631 | <1e-4 | ssl2138  | G0:0048523 | <1e-4 | slr7100  | G0:0022892 | <1e-4 | sll7066  | G0:0008152 | 0.3177 |
| slr0689  | G0:0046394 | <1e-4 | slr7092 | G0:0009892 | <1e-4 | sll11717 | G0:0051716 | <1e-4 | ssl5100  | G0:0022892 | <1e-4 | slr0407  | G0:0008152 | 0.3177 |
| sll18040 | G0:0001932 | <1e-4 | sll0932 | G0:0071554 | <1e-4 | slr0871  | G0:0050896 | <1e-4 | slr1235  | G0:0016462 | <1e-4 | sll11773 | G0:0008152 | 0.3177 |
| sll11511 | G0:0050794 | <1e-4 | ssl3573 | G0:0010468 | <1e-4 | slr0453  | G0:0006220 | <1e-4 | sll0752  | G0:0015291 | <1e-4 | slr7014  | G0:0008152 | 0.3177 |
| slr2049  | G0:0072528 | <1e-4 | sll1355 | G0:0051234 | <1e-4 | slr1101  | G0:0072528 | <1e-4 | ssr0335  | G0:0015399 | <1e-4 | sll15097 | G0:0008152 | 0.3177 |
| ssr3532  | G0:0048523 | <1e-4 | slr1438 | G0:0010468 | <1e-4 | ssr3189  | G0:0042180 | <1e-4 | sll0994  | G0:0016817 | <1e-4 | sll1696  | G0:0008152 | 0.3177 |
| sll10743 | G0:0022411 | <1e-4 | sll0072 | G0:0072521 | <1e-4 | sll0843  | G0:0044260 | <1e-4 | sll1293  | G0:0015399 | <1e-4 | slr0199  | G0:0008152 | 0.3177 |
| sll11123 | G0:0051188 | <1e-4 | sll0478 | G0:0046128 | <1e-4 | slr5021  | G0:0006163 | <1e-4 | sll1510  | G0:0008171 | <1e-4 | slr1407  | G0:0008152 | 0.3177 |
| sll1526  | G0:0019222 | <1e-4 | slr0725 | G0:0051716 | <1e-4 | sll1609  | G0:0019752 | <1e-4 | slr7101  | G0:0022892 | <1e-4 | sll1155  | G0:0008152 | 0.3177 |
| slr7058  | G0:0045184 | <1e-4 | ssr5121 | G0:0031326 | <1e-4 | sll11265 | G0:0009263 | <1e-4 | sll0309  | G0:0022836 | <1e-4 | slr1464  | G0:0008152 | 0.3177 |
| sll1388  | G0:0046483 | <1e-4 | sll0586 | G0:0009260 | <1e-4 | slr0517  | G0:0055114 | <1e-4 | ssl5108  | G0:0016817 | <1e-4 | ssl1972  | G0:0008152 | 0.3177 |
| slr1263  | G0:0044248 | <1e-4 | sll0445 | G0:0009132 | <1e-4 | ssl5008  | G0:0055082 | <1e-4 | sll1352  | G0:0003674 | <1e-4 | sll1863  | G0:0008152 | 0.3177 |
| sll1632  | G0:0046394 | <1e-4 | slr0980 | G0:0009144 | <1e-4 | sll0272  | G0:0043170 | <1e-4 | ssr2317  | G0:0016746 | <1e-4 | ssr2611  | G0:0008152 | 0.3177 |
| ssl5064  | G0:0019219 | <1e-4 | sll1201 | G0:0016053 | <1e-4 | sll0499  | G0:0009260 | <1e-4 | slr5119  | G0:0016462 | <1e-4 | ssl7046  | G0:0008152 | 0.3177 |
| sll0263  | G0:0019752 | <1e-4 | sll0875 | G0:0055082 | <1e-4 | ssl0739  | G0:0044281 | <1e-4 | slr0948  | G0:0022890 | <1e-4 | sll0444  | G0:0008152 | 0.3177 |
| sll1022  | G0:0051716 | <1e-4 | sll0847 | G0:0080090 | <1e-4 | slr1852  | G0:0043549 | <1e-4 | sll11717 | G0:0022836 | <1e-4 | sll0761  | G0:0008152 | 0.3177 |
| slr1547  | G0:0009987 | <1e-4 | ssr3570 | G0:0043436 | <1e-4 | sll0243  | G0:0042455 | <1e-4 | slr1927  | G0:0016741 | <1e-4 | slr0059  | G0:0008152 | 0.3177 |

|         |            |       |         |            |       |         |            |       |         |            |       |         |            |        |
|---------|------------|-------|---------|------------|-------|---------|------------|-------|---------|------------|-------|---------|------------|--------|
| s1r8022 | G0:0006720 | <1e-4 | s1r5012 | G0:0006631 | <1e-4 | s110498 | G0:0051234 | <1e-4 | s1r0038 | G0:0022838 | <1e-4 | s110886 | G0:0008152 | 0.3177 |
| s1r0442 | G0:0006766 | <1e-4 | s1r0243 | G0:0009123 | <1e-4 | s110994 | G0:0046164 | <1e-4 | s110335 | G0:0022892 | <1e-4 | s111797 | G0:0008152 | 0.3177 |
| s1r0058 | G0:0051246 | <1e-4 | s1r1068 | G0:0051818 | <1e-4 | s1r1122 | G0:0044260 | <1e-4 | ssr2317 | G0:0022891 | <1e-4 | s1r0569 | G0:0008152 | 0.3177 |
| s1r2011 | G0:0051818 | <1e-4 | s1r0207 | G0:0009126 | <1e-4 | s1r0318 | G0:0044248 | <1e-4 | s117090 | G0:0015267 | <1e-4 | s1r1920 | G0:0008152 | 0.3177 |
| s1r0765 | G0:0019222 | <1e-4 | s1r1162 | G0:0009144 | <1e-4 | s1r1998 | G0:0009150 | <1e-4 | s1r0912 | G0:0016746 | <1e-4 | s110293 | G0:0008152 | 0.3177 |
| s1r0142 | G0:0009117 | <1e-4 | s110280 | G0:0044282 | <1e-4 | s1r1778 | G0:0009893 | <1e-4 | ss11300 | G0:0022836 | <1e-4 | s111447 | G0:0008152 | 0.3177 |
| s111486 | G0:0016053 | <1e-4 | ssr2803 | G0:0051246 | <1e-4 | s110630 | G0:0050789 | <1e-4 | s111749 | G0:0022836 | <1e-4 | s1r0505 | G0:0008152 | 0.3177 |
| s110659 | G0:0009142 | <1e-4 | s1r7013 | G0:0055086 | <1e-4 | s110350 | G0:0019751 | <1e-4 | s110355 | G0:0003674 | <1e-4 | s1r1069 | G0:0008152 | 0.3177 |
| s111254 | G0:0065007 | <1e-4 | s110932 | G0:0034641 | <1e-4 | s1r1959 | G0:0034654 | <1e-4 | s1r1958 | G0:0005342 | <1e-4 | s110751 | G0:0008152 | 0.3177 |
| s1r1288 | G0:0046907 | <1e-4 | s1r6103 | G0:0006733 | <1e-4 | s111632 | G0:0048518 | <1e-4 | s117066 | G0:0015077 | <1e-4 | s110397 | G0:0008152 | 0.3177 |
| s1r7023 | G0:0048522 | <1e-4 | s111414 | G0:0034641 | <1e-4 | s110272 | G0:0019752 | <1e-4 | s1r1195 | G0:0022892 | <1e-4 | s1r1657 | G0:0008152 | 0.3177 |
| s1r0468 | G0:0006733 | <1e-4 | ssr6003 | G0:0010556 | <1e-4 | s1r6039 | G0:0006163 | <1e-4 | s110183 | G0:0022890 | <1e-4 | s110448 | G0:0008152 | 0.3177 |
| s1r0442 | G0:0006793 | <1e-4 | s1r0360 | G0:0071840 | <1e-4 | s1r1240 | G0:0009126 | <1e-4 | s111191 | G0:0016462 | <1e-4 | ssr6085 | G0:0008152 | 0.3177 |
| s1r1572 | G0:0009126 | <1e-4 | s1r6094 | G0:0048523 | <1e-4 | s111359 | G0:0006766 | <1e-4 | s117050 | G0:0043167 | <1e-4 | ss15098 | G0:0008152 | 0.3177 |
| s117066 | G0:0043412 | <1e-4 | s110815 | G0:0051716 | <1e-4 | s110360 | G0:0071496 | <1e-4 | s1r0959 | G0:0015291 | <1e-4 | s111123 | G0:0008152 | 0.3177 |
| s110218 | G0:0006091 | <1e-4 | s1r1394 | G0:0072521 | <1e-4 | s1r1189 | G0:0019222 | <1e-4 | ss10242 | G0:0022832 | <1e-4 | s111265 | G0:0008152 | 0.3177 |
| s1r0458 | G0:0043648 | <1e-4 | s1r0049 | G0:0009150 | <1e-4 | ss11918 | G0:0006732 | <1e-4 | s111783 | G0:0022838 | <1e-4 | s111485 | G0:0008152 | 0.3177 |
| s1r0981 | G0:0009308 | <1e-4 | s110497 | G0:0046394 | <1e-4 | s1r1493 | G0:0009144 | <1e-4 | s110658 | G0:0016462 | <1e-4 | s1r0065 | G0:0008152 | 0.3177 |
| s110149 | G0:0009987 | <1e-4 | s111262 | G0:0006732 | <1e-4 | ssr2142 | G0:0051716 | <1e-4 | ssr3467 | G0:0016741 | <1e-4 | s111109 | G0:0008152 | 0.3177 |
| s1r0575 | G0:0009889 | <1e-4 | s1r1438 | G0:0009892 | <1e-4 | s111934 | G0:0042451 | <1e-4 | s110147 | G0:0016462 | <1e-4 | ss15095 | G0:0008152 | 0.3177 |
| ss11498 | G0:0072524 | <1e-4 | s111681 | G0:0050794 | <1e-4 | s1r0404 | G0:0006753 | <1e-4 | s1r0479 | G0:0022891 | <1e-4 | ssr6079 | G0:0008152 | 0.3177 |
| s110230 | G0:0019752 | <1e-4 | s1r1932 | G0:0009259 | <1e-4 | s1r6051 | G0:0051246 | <1e-4 | s1r1544 | G0:0022832 | <1e-4 | ss11004 | G0:0008152 | 0.3177 |
| s118035 | G0:0016053 | <1e-4 | s111737 | G0:0009150 | <1e-4 | s111036 | G0:0046128 | <1e-4 | s1r1353 | G0:0022857 | <1e-4 | s1r6013 | G0:0008152 | 0.3177 |
| s110098 | G0:0019751 | <1e-4 | s1r6007 | G0:0006733 | <1e-4 | s111765 | G0:0008150 | <1e-4 | s1r0149 | G0:0060089 | <1e-4 | ssr6048 | G0:0008152 | 0.3177 |
| ssr3572 | G0:0008150 | <1e-4 | s110786 | G0:0048518 | <1e-4 | s1r0784 | G0:0080090 | <1e-4 | ssr2802 | G0:0043167 | <1e-4 | s115047 | G0:0008152 | 0.3177 |
| s1r1895 | G0:0044275 | <1e-4 | s1r1179 | G0:0001932 | <1e-4 | s111359 | G0:0009056 | <1e-4 | ss10294 | G0:0022857 | <1e-4 | s1r7016 | G0:0008152 | 0.3177 |
| s111509 | G0:0031326 | <1e-4 | s111912 | G0:0009199 | <1e-4 | ss15103 | G0:0009987 | <1e-4 | s1r0264 | G0:0016818 | <1e-4 | s1r5116 | G0:0008152 | 0.3177 |
| s110249 | G0:0065007 | <1e-4 | ss15100 | G0:0009199 | <1e-4 | s111089 | G0:0009308 | <1e-4 | s1r1471 | G0:0015077 | <1e-4 | ssr2554 | G0:0008152 | 0.3177 |
| s111265 | G0:0071840 | <1e-4 | s110596 | G0:0006793 | <1e-4 | s110436 | G0:0006163 | <1e-4 | ssr3189 | G0:0060089 | <1e-4 | s1r7081 | G0:0008152 | 0.3177 |
| s111217 | G0:0009123 | <1e-4 | ss12971 | G0:0034654 | <1e-4 | s1r0006 | G0:0043933 | <1e-4 | s1r1468 | G0:0022890 | <1e-4 | s1r1863 | G0:0008152 | 0.3177 |
| s118004 | G0:0009308 | <1e-4 | s1r1576 | G0:0055086 | <1e-4 | s1r0582 | G0:0009056 | <1e-4 | s1r1611 | G0:0008171 | <1e-4 | s1r1378 | G0:0008152 | 0.3177 |
| s110525 | G0:0016054 | <1e-4 | s1r2105 | G0:0044106 | <1e-4 | s115032 | G0:0009161 | <1e-4 | s1r7092 | G0:0015405 | <1e-4 | s110102 | G0:0008152 | 0.3177 |
| s1r0204 | G0:0048522 | <1e-4 | s1r1189 | G0:0043648 | <1e-4 | s117078 | G0:0051818 | <1e-4 | s110321 | G0:0022836 | <1e-4 | s1r6067 | G0:0008152 | 0.3177 |
| s110376 | G0:0009056 | <1e-4 | s1r1513 | G0:0009161 | <1e-4 | s110314 | G0:0050789 | <1e-4 | s1r0479 | G0:0015291 | <1e-4 | s110241 | G0:0008152 | 0.3177 |
| s1r0179 | G0:0006766 | <1e-4 | s110297 | G0:0051186 | <1e-4 | ssr7084 | G0:0071842 | <1e-4 | s1r1431 | G0:0043492 | <1e-4 | ssr1951 | G0:0008152 | 0.3177 |
| s1r1636 | G0:0009199 | <1e-4 | s1r1449 | G0:0065007 | <1e-4 | ssr2554 | G0:0005996 | <1e-4 | s1r1623 | G0:0022836 | <1e-4 | s111880 | G0:0008152 | 0.3177 |
| s110669 | G0:0046128 | <1e-4 | ss12064 | G0:0044260 | <1e-4 | s1r1419 | G0:0044255 | <1e-4 | ssr3410 | G0:0022836 | <1e-4 | s1r1998 | G0:0008152 | 0.3177 |
| s111162 | G0:0006753 | <1e-4 | s110230 | G0:0034660 | <1e-4 | s110487 | G0:0006082 | <1e-4 | s1r0815 | G0:0022803 | <1e-4 | s1r1306 | G0:0008152 | 0.3177 |
| s110098 | G0:0009161 | <1e-4 | ssr2711 | G0:0006091 | <1e-4 | s115128 | G0:0050794 | <1e-4 | ssr1375 | G0:0022836 | <1e-4 | ss12148 | G0:0008152 | 0.3177 |
| ssr7035 | G0:0072527 | <1e-4 | s1r7025 | G0:0022607 | <1e-4 | s111601 | G0:0044275 | <1e-4 | s110325 | G0:0022836 | <1e-4 | s1r1340 | G0:0008152 | 0.3177 |
| s1r1704 | G0:0042451 | <1e-4 | ss18008 | G0:0006091 | <1e-4 | s1r6015 | G0:0006766 | <1e-4 | ss17038 | G0:0008171 | <1e-4 | ss12245 | G0:0008152 | 0.3177 |
| s1r0514 | G0:0009150 | <1e-4 | s1r1429 | G0:0033013 | <1e-4 | ssr0759 | G0:0006163 | <1e-4 | s1r1095 | G0:0022892 | <1e-4 | s110400 | G0:0008152 | 0.3177 |
| s1r0596 | G0:0071554 | <1e-4 | s110688 | G0:0009126 | <1e-4 | s1r1342 | G0:0006066 | <1e-4 | s110623 | G0:0022838 | <1e-4 | s1r1813 | G0:0008152 | 0.3177 |
| s1r0483 | G0:0006732 | <1e-4 | s1r1847 | G0:0046164 | <1e-4 | s1r1618 | G0:0044271 | <1e-4 | s110858 | G0:0022891 | <1e-4 | s111509 | G0:0008152 | 0.3177 |
| s1r1623 | G0:0046394 | <1e-4 | s111240 | G0:0009262 | <1e-4 | s1r1107 | G0:0006721 | <1e-4 | s1r6005 | G0:0005342 | <1e-4 | s1r1097 | G0:0008152 | 0.3177 |
| ssr5092 | G0:0009056 | <1e-4 | s111062 | G0:0050794 | <1e-4 | s1r1519 | G0:0006753 | <1e-4 | s111061 | G0:0022803 | <1e-4 | ss15031 | G0:0008152 | 0.3177 |
| s110269 | G0:0048518 | <1e-4 | s115006 | G0:0044283 | <1e-4 | s1r0937 | G0:0031323 | <1e-4 | s1r2025 | G0:0022891 | <1e-4 | s110481 | G0:0008152 | 0.3177 |
| ss10294 | G0:0043412 | <1e-4 | s111162 | G0:0050896 | <1e-4 | s111528 | G0:0019219 | <1e-4 | s1r6015 | G0:0016746 | <1e-4 | s111606 | G0:0008152 | 0.3177 |
| s1r0376 | G0:0080090 | <1e-4 | s1r1301 | G0:0080090 | <1e-4 | s111934 | G0:0019222 | <1e-4 | s111036 | G0:0022891 | <1e-4 | s111504 | G0:0008152 | 0.3177 |
| s1r0589 | G0:0046164 | <1e-4 | s111934 | G0:0009132 | <1e-4 | s110068 | G0:0046164 | <1e-4 | s1r1789 | G0:0022836 | <1e-4 | s1r5119 | G0:0008152 | 0.3177 |
| s111250 | G0:0019362 | <1e-4 | s110283 | G0:0043412 | <1e-4 | s1r1557 | G0:0052111 | <1e-4 | s1r1186 | G0:0022891 | <1e-4 | s111926 | G0:0003824 | 0.2837 |
| ssr2318 | G0:0051818 | <1e-4 | s1r1647 | G0:0009117 | <1e-4 | ssr6086 | G0:0072527 | <1e-4 | s1r0184 | G0:0042623 | <1e-4 | s1r6088 | G0:0003824 | 0.2837 |
| s111052 | G0:0009144 | <1e-4 | ss13573 | G0:0051347 | <1e-4 | s1r1546 | G0:0009199 | <1e-4 | s1r1591 | G0:0015399 | <1e-4 | s117078 | G0:0003824 | 0.2837 |
| s110335 | G0:0009165 | <1e-4 | s1r1628 | G0:0043549 | <1e-4 | s1r0157 | G0:0051818 | <1e-4 | ssr6003 | G0:0005342 | <1e-4 | ssr2802 | G0:0003824 | 0.2837 |

|         |            |       |         |            |       |         |            |       |         |            |       |         |            |        |
|---------|------------|-------|---------|------------|-------|---------|------------|-------|---------|------------|-------|---------|------------|--------|
| slr0935 | G0:0009144 | <1e-4 | ssr5121 | G0:0019222 | <1e-4 | slr1273 | G0:0072521 | <1e-4 | sl10553 | G0:0022892 | <1e-4 | slr0459 | G0:0003824 | 0.2837 |
| sl10162 | G0:0018130 | <1e-4 | ssl1255 | G0:0019362 | <1e-4 | ssr0657 | G0:0048878 | <1e-4 | sl11123 | G0:0015077 | <1e-4 | slr1537 | G0:0003824 | 0.2837 |
| slr0521 | G0:0009263 | <1e-4 | slr1704 | G0:0006082 | <1e-4 | slr6103 | G0:0009057 | <1e-4 | ssr7079 | G0:0022892 | <1e-4 | ssr0761 | G0:0003824 | 0.2837 |
| sl11737 | G0:0009142 | <1e-4 | sl16053 | G0:0044255 | <1e-4 | slr0712 | G0:0006720 | <1e-4 | sl11378 | G0:0005342 | <1e-4 | ss16061 | G0:0003824 | 0.2837 |
| slr2084 | G0:0009056 | <1e-4 | sl15003 | G0:0022411 | <1e-4 | slr1614 | G0:0044248 | <1e-4 | sl10625 | G0:0015077 | <1e-4 | slr0184 | G0:0003824 | 0.2837 |
| sl10167 | G0:0043549 | <1e-4 | slr6103 | G0:0043412 | <1e-4 | slr0270 | G0:0043170 | <1e-4 | ssr1528 | G0:0015399 | <1e-4 | sl10294 | G0:0003824 | 0.2837 |
| slr0818 | G0:0006091 | <1e-4 | sl11350 | G0:0043933 | <1e-4 | slr0887 | G0:0071840 | <1e-4 | ssr2142 | G0:0003674 | <1e-4 | sl10691 | G0:0003824 | 0.2837 |
| sl10572 | G0:0045184 | <1e-4 | sl10982 | G0:0044003 | <1e-4 | sl10602 | G0:0072528 | <1e-4 | ss12420 | G0:0043167 | <1e-4 | sl11911 | G0:0003824 | 0.2837 |
| sl10487 | G0:0008150 | <1e-4 | sl11002 | G0:0031326 | <1e-4 | ssr2755 | G0:0009262 | <1e-4 | sl11132 | G0:0022803 | <1e-4 | slr0967 | G0:0003824 | 0.2837 |
| sl11785 | G0:0052111 | <1e-4 | slr0725 | G0:0009165 | <1e-4 | slr5101 | G0:0044275 | <1e-4 | sl11960 | G0:0060089 | <1e-4 | slr7091 | G0:0003824 | 0.2837 |
| sl10933 | G0:0042180 | <1e-4 | slr2120 | G0:0048523 | <1e-4 | ssr7084 | G0:0019219 | <1e-4 | ssr7036 | G0:0043167 | <1e-4 | slr1173 | G0:0003824 | 0.2837 |
| ssr3570 | G0:0019222 | <1e-4 | sl11691 | G0:0050794 | <1e-4 | slr1162 | G0:0010556 | <1e-4 | ssr2422 | G0:0015077 | <1e-4 | ss15025 | G0:0003824 | 0.2837 |
| slr1737 | G0:0071554 | <1e-4 | ssr1407 | G0:0044003 | <1e-4 | ss11972 | G0:0031323 | <1e-4 | sl10156 | G0:0015291 | <1e-4 | slr6033 | G0:0003824 | 0.2837 |
| slr2052 | G0:0044260 | <1e-4 | slr8014 | G0:0080090 | <1e-4 | slr1519 | G0:0055086 | <1e-4 | slr1266 | G0:0043492 | <1e-4 | slr0588 | G0:0003824 | 0.2837 |
| slr1906 | G0:0046483 | <1e-4 | ssl5100 | G0:0044255 | <1e-4 | sl11072 | G0:0051716 | <1e-4 | sl11252 | G0:0060089 | <1e-4 | sl18040 | G0:0003824 | 0.2837 |
| sl10497 | G0:0006732 | <1e-4 | sl11866 | G0:0090304 | <1e-4 | ss18005 | G0:0009124 | <1e-4 | slr1143 | G0:0003674 | <1e-4 | sl17069 | G0:0003824 | 0.2837 |
| ssr3129 | G0:0009059 | <1e-4 | sl11306 | G0:0009056 | <1e-4 | slr0708 | G0:0008150 | <1e-4 | slr0147 | G0:0005342 | <1e-4 | ssr1041 | G0:0003824 | 0.2837 |
| ssr1391 | G0:0006811 | <1e-4 | slr2119 | G0:0006091 | <1e-4 | ssr5011 | G0:0016053 | <1e-4 | sl18011 | G0:0016462 | <1e-4 | slr0313 | G0:0003824 | 0.2837 |
| sl11021 | G0:0044106 | <1e-4 | slr5016 | G0:0060255 | <1e-4 | ssr2318 | G0:0019751 | <1e-4 | sl10394 | G0:0016746 | <1e-4 | sl17031 | G0:0003824 | 0.2837 |
| sl11188 | G0:0050896 | <1e-4 | sl10309 | G0:0044281 | <1e-4 | slr1444 | G0:0043648 | <1e-4 | sl15063 | G0:0022857 | <1e-4 | slr8021 | G0:0003824 | 0.2837 |
| slr1495 | G0:0009893 | <1e-4 | sl11722 | G0:0006631 | <1e-4 | slr1616 | G0:0019362 | <1e-4 | sl11388 | G0:0015293 | <1e-4 | ssr1425 | G0:0003824 | 0.2837 |
| ssl7022 | G0:0022411 | <1e-4 | ssl0352 | G0:0045184 | <1e-4 | sl10736 | G0:0006811 | <1e-4 | slr1470 | G0:0015293 | <1e-4 | ssr8013 | G0:0003824 | 0.2837 |
| sl17055 | G0:0019219 | <1e-4 | slr1290 | G0:0010556 | <1e-4 | sl10167 | G0:0048519 | <1e-4 | slr0204 | G0:0005342 | <1e-4 | slr1101 | G0:0003824 | 0.2837 |
| sl10085 | G0:0090304 | <1e-4 | sl10414 | G0:0071554 | <1e-4 | slr1977 | G0:0044003 | <1e-4 | sl11396 | G0:0022890 | <1e-4 | slr0285 | G0:0003824 | 0.2837 |
| slr0978 | G0:0009199 | <1e-4 | sl15028 | G0:0044248 | <1e-4 | sl15034 | G0:0006753 | <1e-4 | sl11954 | G0:0022803 | <1e-4 | slr1174 | G0:0003824 | 0.2837 |
| slr1407 | G0:0019362 | <1e-4 | slr0815 | G0:0019222 | <1e-4 | sl17086 | G0:0006720 | <1e-4 | sl16052 | G0:0015291 | <1e-4 | ssr8047 | G0:0003824 | 0.2837 |
| slr7071 | G0:0072521 | <1e-4 | slr1442 | G0:0009259 | <1e-4 | ssl1417 | G0:0009142 | <1e-4 | sl11318 | G0:0022838 | <1e-4 | slr0397 | G0:0003824 | 0.2837 |
| slr5101 | G0:0042455 | <1e-4 | sl11400 | G0:0051716 | <1e-4 | slr1419 | G0:0048518 | <1e-4 | sl11191 | G0:0003674 | <1e-4 | sl10069 | G0:0003824 | 0.2837 |
| slr2105 | G0:0009260 | <1e-4 | sl18001 | G0:0006793 | <1e-4 | sl10930 | G0:0051179 | <1e-4 | ssr3570 | G0:0022892 | <1e-4 | sl10172 | G0:0003824 | 0.2837 |
| slr1657 | G0:0042180 | <1e-4 | sl17062 | G0:0044281 | <1e-4 | sl11477 | G0:0046483 | <1e-4 | ssl5113 | G0:0015075 | <1e-4 | sl10479 | G0:0003824 | 0.2837 |
| sl10751 | G0:0006066 | <1e-4 | slr6051 | G0:0033013 | <1e-4 | sl11611 | G0:0044260 | <1e-4 | slr0552 | G0:0016818 | <1e-4 | slr6009 | G0:0003824 | 0.2837 |
| sl10482 | G0:0019362 | <1e-4 | slr6008 | G0:0031326 | <1e-4 | slr2121 | G0:0008150 | <1e-4 | slr1070 | G0:0022836 | <1e-4 | sl11233 | G0:0003824 | 0.2837 |
| slr0801 | G0:0009987 | <1e-4 | slr1363 | G0:0055114 | <1e-4 | slr1431 | G0:0006725 | <1e-4 | sl18040 | G0:0015399 | <1e-4 | slr1670 | G0:0003824 | 0.2837 |
| sl10499 | G0:0043412 | <1e-4 | slr1577 | G0:0071496 | <1e-4 | slr1854 | G0:0071842 | <1e-4 | sl11414 | G0:0022832 | <1e-4 | sl15004 | G0:0003824 | 0.2837 |
| sl11119 | G0:0044260 | <1e-4 | slr1809 | G0:0044260 | <1e-4 | slr0913 | G0:0008610 | <1e-4 | sl11715 | G0:0043492 | <1e-4 | ss10410 | G0:0003824 | 0.2837 |
| slr1391 | G0:0048518 | <1e-4 | ssl1972 | G0:0022411 | <1e-4 | sl10503 | G0:0009262 | <1e-4 | slr1573 | G0:0005342 | <1e-4 | ss12064 | G0:0003824 | 0.2837 |
| sl10282 | G0:0006811 | <1e-4 | sl10269 | G0:0016053 | <1e-4 | slr2027 | G0:0050801 | <1e-4 | slr0521 | G0:0022892 | <1e-4 | ssr1558 | G0:0003824 | 0.2837 |
| slr6005 | G0:0006082 | <1e-4 | ssl2471 | G0:0051171 | <1e-4 | sl11505 | G0:0046164 | <1e-4 | sl10939 | G0:0042623 | <1e-4 | slr2070 | G0:0003824 | 0.2837 |
| slr1397 | G0:0009161 | <1e-4 | slr1862 | G0:0044281 | <1e-4 | sl10980 | G0:0009394 | <1e-4 | sl11862 | G0:0016817 | <1e-4 | sl11188 | G0:0003824 | 0.2837 |
| slr0654 | G0:0055114 | <1e-4 | slr2144 | G0:0009150 | <1e-4 | ssl7045 | G0:0043412 | <1e-4 | ssl1972 | G0:0016462 | <1e-4 | slr1886 | G0:0003824 | 0.2837 |
| ssl3549 | G0:0046394 | <1e-4 | sl10241 | G0:0046394 | <1e-4 | slr0299 | G0:0051716 | <1e-4 | slr1864 | G0:0022890 | <1e-4 | sl11573 | G0:0003824 | 0.2837 |
| ssl1263 | G0:0051186 | <1e-4 | slr1122 | G0:0048523 | <1e-4 | slr0498 | G0:0009987 | <1e-4 | sl15090 | G0:0005342 | <1e-4 | ssr5106 | G0:0003824 | 0.2837 |
| slr0148 | G0:0031323 | <1e-4 | slr0668 | G0:0072524 | <1e-4 | sl10703 | G0:0051188 | <1e-4 | slr1851 | G0:0015399 | <1e-4 | sl10327 | G0:0003824 | 0.2837 |
| slr0489 | G0:0051171 | <1e-4 | sl10372 | G0:0006631 | <1e-4 | sl11504 | G0:0022607 | <1e-4 | slr0360 | G0:0042623 | <1e-4 | slr0345 | G0:0003824 | 0.2837 |
| slr1495 | G0:0005996 | <1e-4 | sl10932 | G0:0001932 | <1e-4 | slr1923 | G0:0046128 | <1e-4 | sl11304 | G0:0016741 | <1e-4 | slr1935 | G0:0003824 | 0.2837 |
| sl18033 | G0:0006811 | <1e-4 | slr1472 | G0:0071840 | <1e-4 | ssl2069 | G0:0060255 | <1e-4 | slr1493 | G0:0022832 | <1e-4 | ssl2971 | G0:0003824 | 0.2837 |
| slr0482 | G0:0006766 | <1e-4 | slr7025 | G0:0008150 | <1e-4 | sl10310 | G0:0051347 | <1e-4 | sl11717 | G0:0016818 | <1e-4 | sl11024 | G0:0003824 | 0.2837 |
| slr6009 | G0:0045184 | <1e-4 | sl10837 | G0:0044282 | <1e-4 | slr1957 | G0:0050801 | <1e-4 | slr0294 | G0:0022891 | <1e-4 | ssl2162 | G0:0003824 | 0.2837 |
| slr1258 | G0:0043648 | <1e-4 | slr1396 | G0:0006091 | <1e-4 | sl18011 | G0:0009309 | <1e-4 | ssr2972 | G0:0042623 | <1e-4 | slr0106 | G0:0003824 | 0.2837 |
| sl10024 | G0:0009059 | <1e-4 | slr7095 | G0:0006066 | <1e-4 | ssr0536 | G0:0051171 | <1e-4 | sl11510 | G0:0015399 | <1e-4 | ssr6062 | G0:0003824 | 0.2837 |
| slr0670 | G0:0071841 | <1e-4 | sl15026 | G0:0009132 | <1e-4 | sl11095 | G0:0043436 | <1e-4 | slr1957 | G0:0005342 | <1e-4 | slr5101 | G0:0003824 | 0.2837 |
| ssr2422 | G0:0009057 | <1e-4 | sl10282 | G0:0051818 | <1e-4 | slr1472 | G0:0043933 | <1e-4 | sl10939 | G0:0016818 | <1e-4 | slr0326 | G0:0003824 | 0.2837 |
| slr1340 | G0:0016052 | <1e-4 | slr1851 | G0:0050801 | <1e-4 | slr1339 | G0:0051716 | <1e-4 | slr1438 | G0:0015293 | <1e-4 | slr1752 | G0:0003824 | 0.2837 |
| slr5111 | G0:0006766 | <1e-4 | slr2070 | G0:0009394 | <1e-4 | slr7057 | G0:0050801 | <1e-4 | slr0398 | G0:0015291 | <1e-4 | sl11979 | G0:0003824 | 0.2837 |

|         |            |       |         |            |       |         |            |       |         |            |       |         |            |        |
|---------|------------|-------|---------|------------|-------|---------|------------|-------|---------|------------|-------|---------|------------|--------|
| sl10424 | G0:0019222 | <1e-4 | ssl5100 | G0:0008150 | <1e-4 | sl10281 | G0:0072528 | <1e-4 | sl10237 | G0:0043167 | <1e-4 | slr6091 | G0:0003824 | 0.2837 |
| sl11530 | G0:0010556 | <1e-4 | sl10524 | G0:0006576 | <1e-4 | ssr6020 | G0:0071554 | <1e-4 | sl11053 | G0:0015293 | <1e-4 | sl11285 | G0:0003824 | 0.2837 |
| sl12013 | G0:0046483 | <1e-4 | slr1681 | G0:0051179 | <1e-4 | ss13383 | G0:0050789 | <1e-4 | slr1306 | G0:0022836 | <1e-4 | slr5126 | G0:0003824 | 0.2837 |
| slr1095 | G0:0055082 | <1e-4 | slr1618 | G0:0060255 | <1e-4 | ss15027 | G0:0022411 | <1e-4 | slr6065 | G0:0015405 | <1e-4 | slr0516 | G0:0003824 | 0.2837 |
| sl11486 | G0:0006811 | <1e-4 | slr1618 | G0:0080090 | <1e-4 | sl17090 | G0:0046128 | <1e-4 | ss13451 | G0:0022832 | <1e-4 | slr6016 | G0:0003824 | 0.2837 |
| slr0709 | G0:0009259 | <1e-4 | slr1880 | G0:0042455 | <1e-4 | sl11241 | G0:0006082 | <1e-4 | slr1097 | G0:0022836 | <1e-4 | ssr0759 | G0:0003824 | 0.2837 |
| slr1365 | G0:0022607 | <1e-4 | slr1338 | G0:0019362 | <1e-4 | ss10352 | G0:0019362 | <1e-4 | slr0476 | G0:0042623 | <1e-4 | slr0689 | G0:0003824 | 0.2837 |
| slr2005 | G0:0042180 | <1e-4 | ssr6079 | G0:0019222 | <1e-4 | slr7091 | G0:0043170 | <1e-4 | ss12733 | G0:0003674 | <1e-4 | sl15063 | G0:0003824 | 0.2837 |
| ssr2201 | G0:0043412 | <1e-4 | slr7082 | G0:0048519 | <1e-4 | sl10181 | G0:0009165 | <1e-4 | slr0602 | G0:0015405 | <1e-4 | ssr5092 | G0:0003824 | 0.2837 |
| slr1906 | G0:0072524 | <1e-4 | sl11764 | G0:0080090 | <1e-4 | slr0816 | G0:0009150 | <1e-4 | ss15091 | G0:0016818 | <1e-4 | sl10905 | G0:0003824 | 0.2837 |
| sl11201 | G0:0009124 | <1e-4 | slr1778 | G0:0048523 | <1e-4 | slr0962 | G0:0009263 | <1e-4 | slr0333 | G0:0008171 | <1e-4 | slr7060 | G0:0003824 | 0.2837 |
| sl11390 | G0:0009056 | <1e-4 | slr1537 | G0:0044260 | <1e-4 | sl11132 | G0:0055114 | <1e-4 | slr1047 | G0:0022836 | <1e-4 | sl15028 | G0:0003824 | 0.2837 |
| sl10932 | G0:0042180 | <1e-4 | ss18005 | G0:0019222 | <1e-4 | sl10981 | G0:0019222 | <1e-4 | sl11652 | G0:0022890 | <1e-4 | ss15103 | G0:0003824 | 0.2837 |
| ss10467 | G0:0006082 | <1e-4 | sl11315 | G0:0043436 | <1e-4 | slr1441 | G0:0044260 | <1e-4 | slr1207 | G0:0015077 | <1e-4 | slr0613 | G0:0003824 | 0.2837 |
| slr1470 | G0:0019362 | <1e-4 | slr0637 | G0:0050789 | <1e-4 | ssr0692 | G0:0009259 | <1e-4 | sl10602 | G0:0015291 | <1e-4 | ss13549 | G0:0003824 | 0.2837 |
| slr6068 | G0:0019637 | <1e-4 | slr2117 | G0:0019637 | <1e-4 | sl10931 | G0:0034654 | <1e-4 | ss12065 | G0:0008171 | <1e-4 | slr1425 | G0:0003824 | 0.2837 |
| ss15025 | G0:0048523 | <1e-4 | slr5012 | G0:0048878 | <1e-4 | slr6091 | G0:0044271 | <1e-4 | sl10283 | G0:0043492 | <1e-4 | sl12011 | G0:0003824 | 0.2837 |
| slr1880 | G0:0019222 | <1e-4 | slr1406 | G0:0042180 | <1e-4 | slr1083 | G0:0031323 | <1e-4 | sl11783 | G0:0022892 | <1e-4 | ss11378 | G0:0003824 | 0.2837 |
| sl10584 | G0:0055114 | <1e-4 | sl11054 | G0:0009126 | <1e-4 | ss11690 | G0:0008610 | <1e-4 | slr1407 | G0:0015399 | <1e-4 | sl11254 | G0:0003824 | 0.2837 |
| ssr3402 | G0:0043436 | <1e-4 | sl10760 | G0:0043170 | <1e-4 | slr6039 | G0:0065007 | <1e-4 | ss15008 | G0:0022857 | <1e-4 | slr0813 | G0:0003824 | 0.2837 |
| slr1940 | G0:0009889 | <1e-4 | slr0491 | G0:0009889 | <1e-4 | slr6044 | G0:0009117 | <1e-4 | sl10994 | G0:0022803 | <1e-4 | sl11151 | G0:0003824 | 0.2837 |
| sl17033 | G0:0051171 | <1e-4 | slr0270 | G0:0050794 | <1e-4 | ssr5019 | G0:0022411 | <1e-4 | slr0442 | G0:0042623 | <1e-4 | slr1816 | G0:0003824 | 0.2837 |
| sl10553 | G0:0071841 | <1e-4 | sl11654 | G0:0043933 | <1e-4 | ssr3570 | G0:0046907 | <1e-4 | slr1917 | G0:0015075 | <1e-4 | slr0755 | G0:0003824 | 0.2837 |
| ss12065 | G0:0006631 | <1e-4 | sl11965 | G0:0009141 | <1e-4 | slr1644 | G0:0071840 | <1e-4 | ssr0102 | G0:0016741 | <1e-4 | ssr3467 | G0:0003824 | 0.2837 |
| sl10274 | G0:0019752 | <1e-4 | slr0751 | G0:0043648 | <1e-4 | ss12069 | G0:0006576 | <1e-4 | ssr1155 | G0:0016817 | <1e-4 | sl17033 | G0:0003824 | 0.2837 |
| ssr0657 | G0:0055082 | <1e-4 | slr7102 | G0:0034654 | <1e-4 | slr2080 | G0:0018130 | <1e-4 | slr1273 | G0:0043492 | <1e-4 | sl10405 | G0:0003824 | 0.2837 |
| slr0941 | G0:0006811 | <1e-4 | sl11956 | G0:0019222 | <1e-4 | ss15103 | G0:0006066 | <1e-4 | sl11022 | G0:0003674 | <1e-4 | slr6051 | G0:0003824 | 0.2837 |
| sl10406 | G0:0034654 | <1e-4 | slr0262 | G0:0006766 | <1e-4 | sl11541 | G0:0044003 | <1e-4 | slr0667 | G0:0022803 | <1e-4 | slr2060 | G0:0003824 | 0.2837 |
| slr1101 | G0:0009263 | <1e-4 | ss15007 | G0:0042451 | <1e-4 | slr0386 | G0:0009057 | <1e-4 | sl18012 | G0:0022890 | <1e-4 | ss15108 | G0:0003824 | 0.2837 |
| ss12064 | G0:0006753 | <1e-4 | sl11873 | G0:0046164 | <1e-4 | slr0423 | G0:0009117 | <1e-4 | slr1918 | G0:0003674 | <1e-4 | ss15113 | G0:0003824 | 0.2837 |
| ssr6085 | G0:0080090 | <1e-4 | sl15097 | G0:0060255 | <1e-4 | ss12069 | G0:0034641 | <1e-4 | ssr2201 | G0:0016746 | <1e-4 | slr7099 | G0:0003824 | 0.2837 |
| slr0398 | G0:0019637 | <1e-4 | slr1188 | G0:0005996 | <1e-4 | slr0921 | G0:0006753 | <1e-4 | slr0294 | G0:0008171 | <1e-4 | slr1681 | G0:0003824 | 0.2837 |
| sl11022 | G0:0009059 | <1e-4 | ssr5011 | G0:0050896 | <1e-4 | slr6073 | G0:0006793 | <1e-4 | slr2119 | G0:0022832 | <1e-4 | sl10253 | G0:0003824 | 0.2837 |
| sl11131 | G0:0050896 | <1e-4 | slr1547 | G0:0006163 | <1e-4 | sl16054 | G0:0009394 | <1e-4 | slr0217 | G0:0015075 | <1e-4 | slr5012 | G0:0003824 | 0.2837 |
| sl10702 | G0:0044282 | <1e-4 | sl11022 | G0:0052111 | <1e-4 | sl10024 | G0:0009124 | <1e-4 | slr2000 | G0:0016817 | <1e-4 | slr1513 | G0:0003824 | 0.2837 |
| slr2110 | G0:0043549 | <1e-4 | slr1917 | G0:0051347 | <1e-4 | slr7096 | G0:0044255 | <1e-4 | slr1507 | G0:0022832 | <1e-4 | sl10062 | G0:0003824 | 0.2837 |
| slr1262 | G0:0051179 | <1e-4 | sl10294 | G0:0080090 | <1e-4 | slr0815 | G0:0019751 | <1e-4 | ss12064 | G0:0003674 | <1e-4 | sl10839 | G0:0003824 | 0.2837 |
| sl10269 | G0:0006082 | <1e-4 | sl11250 | G0:0043549 | <1e-4 | sl11166 | G0:0006066 | <1e-4 | slr1417 | G0:0005342 | <1e-4 | slr0082 | G0:0003824 | 0.2837 |
| slr1407 | G0:0006082 | <1e-4 | slr1813 | G0:0051188 | <1e-4 | sl10545 | G0:0019752 | <1e-4 | sl11834 | G0:0060089 | <1e-4 | sl11049 | G0:0003824 | 0.2837 |
| sl10871 | G0:0018130 | <1e-4 | sl10442 | G0:0006811 | <1e-4 | slr0935 | G0:0044282 | <1e-4 | sl10444 | G0:0005342 | <1e-4 | sl10157 | G0:0003824 | 0.2837 |
| sl10539 | G0:0009263 | <1e-4 | sl10837 | G0:0034660 | <1e-4 | sl10997 | G0:0051179 | <1e-4 | slr6068 | G0:0015293 | <1e-4 | slr1170 | G0:0003824 | 0.2837 |
| ssr8013 | G0:0006082 | <1e-4 | slr5126 | G0:0071554 | <1e-4 | slr1774 | G0:0046907 | <1e-4 | slr0503 | G0:0015075 | <1e-4 | sl10670 | G0:0003824 | 0.2837 |
| slr0241 | G0:0006733 | <1e-4 | sl11414 | G0:0009150 | <1e-4 | sl10376 | G0:0009057 | <1e-4 | ss15096 | G0:0016818 | <1e-4 | slr5077 | G0:0003824 | 0.2837 |
| slr1196 | G0:0043648 | <1e-4 | slr0489 | G0:0050794 | <1e-4 | sl10781 | G0:0019219 | <1e-4 | slr1773 | G0:0003674 | <1e-4 | sl17090 | G0:0003824 | 0.2837 |
| sl10930 | G0:0072522 | <1e-4 | slr0111 | G0:0019637 | <1e-4 | ssr3300 | G0:0044271 | <1e-4 | sl11155 | G0:0022803 | <1e-4 | slr7073 | G0:0003824 | 0.2837 |
| sl11192 | G0:0042180 | <1e-4 | sl11414 | G0:0052188 | <1e-4 | sl10563 | G0:0034654 | <1e-4 | ssr2009 | G0:0015075 | <1e-4 | sl10098 | G0:0003824 | 0.2837 |
| slr7081 | G0:0006753 | <1e-4 | slr7098 | G0:0046164 | <1e-4 | sl11698 | G0:0009142 | <1e-4 | sl10176 | G0:0015293 | <1e-4 | sl11321 | G0:0003824 | 0.2837 |
| slr1143 | G0:0071496 | <1e-4 | sl10656 | G0:0050801 | <1e-4 | sl11530 | G0:0006163 | <1e-4 | slr1315 | G0:0015399 | <1e-4 | slr2012 | G0:0003824 | 0.2837 |
| ss15027 | G0:0010556 | <1e-4 | slr1864 | G0:0034660 | <1e-4 | sl10069 | G0:0010468 | <1e-4 | slr1415 | G0:0022832 | <1e-4 | ss17007 | G0:0003824 | 0.2837 |
| sl11785 | G0:0019219 | <1e-4 | slr1699 | G0:0052111 | <1e-4 | slr0729 | G0:0048518 | <1e-4 | slr1667 | G0:0022838 | <1e-4 | slr6068 | G0:0003824 | 0.2837 |
| ss12920 | G0:0006163 | <1e-4 | slr0876 | G0:0006733 | <1e-4 | ss10242 | G0:0072528 | <1e-4 | sl10525 | G0:0022892 | <1e-4 | slr0590 | G0:0003824 | 0.2837 |
| slr1789 | G0:0043412 | <1e-4 | ssr6020 | G0:0044003 | <1e-4 | slr7059 | G0:0046394 | <1e-4 | slr7016 | G0:0022838 | <1e-4 | slr2027 | G0:0003824 | 0.2837 |
| slr7098 | G0:0072527 | <1e-4 | slr0852 | G0:0008150 | <1e-4 | slr1702 | G0:0009161 | <1e-4 | slr6073 | G0:0043167 | <1e-4 | sl11702 | G0:0003824 | 0.2837 |
| slr1895 | G0:0043933 | <1e-4 | ss10109 | G0:0071842 | <1e-4 | slr1619 | G0:0009892 | <1e-4 | ss10483 | G0:0022892 | <1e-4 | sl11191 | G0:0003824 | 0.2837 |

|         |            |       |         |            |       |         |            |       |         |            |       |         |            |        |
|---------|------------|-------|---------|------------|-------|---------|------------|-------|---------|------------|-------|---------|------------|--------|
| sl10085 | G0:0008150 | <1e-4 | ssr5092 | G0:0051171 | <1e-4 | sl10301 | G0:0019637 | <1e-4 | sl11304 | G0:0022832 | <1e-4 | ss17045 | G0:0003824 | 0.2837 |
| slr0374 | G0:0060255 | <1e-4 | ss13615 | G0:0022411 | <1e-4 | sl10762 | G0:0045184 | <1e-4 | sl11022 | G0:0016462 | <1e-4 | slr0780 | G0:0003824 | 0.2837 |
| ss10787 | G0:0033013 | <1e-4 | sl10447 | G0:0051716 | <1e-4 | ssr0109 | G0:0006220 | <1e-4 | sl10854 | G0:0022803 | <1e-4 | sl11784 | G0:0003824 | 0.2837 |
| sl10985 | G0:0060255 | <1e-4 | slr0553 | G0:0044003 | <1e-4 | ssr6099 | G0:0051716 | <1e-4 | slr0709 | G0:0016746 | <1e-4 | ss17048 | G0:0003824 | 0.2837 |
| slr1956 | G0:0006753 | <1e-4 | slr0784 | G0:0009141 | <1e-4 | sl11400 | G0:0080090 | <1e-4 | slr1376 | G0:0008171 | <1e-4 | slr1601 | G0:0003824 | 0.2837 |
| sl10756 | G0:0071842 | <1e-4 | ss10787 | G0:0048878 | <1e-4 | sl11240 | G0:0046483 | <1e-4 | sl10630 | G0:0008171 | <1e-4 | slr1449 | G0:0003824 | 0.2837 |
| sl10442 | G0:0009123 | <1e-4 | slr1906 | G0:0055086 | <1e-4 | slr0909 | G0:0072521 | <1e-4 | sl11696 | G0:0016746 | <1e-4 | ss11300 | G0:0003824 | 0.2837 |
| sl18035 | G0:0006066 | <1e-4 | sl11737 | G0:0046164 | <1e-4 | sl10751 | G0:0006811 | <1e-4 | sl15090 | G0:0022890 | <1e-4 | sl10608 | G0:0003824 | 0.2837 |
| ss13549 | G0:0051179 | <1e-4 | sl10265 | G0:0050789 | <1e-4 | sl11696 | G0:0005996 | <1e-4 | slr1990 | G0:0016746 | <1e-4 | sl17050 | G0:0003824 | 0.2837 |
| sl11632 | G0:0050801 | <1e-4 | slr1464 | G0:0046483 | <1e-4 | slr0509 | G0:0050896 | <1e-4 | slr5023 | G0:0060089 | <1e-4 | sl10321 | G0:0003824 | 0.2837 |
| slr1079 | G0:0050794 | <1e-4 | sl10783 | G0:0010468 | <1e-4 | sl11570 | G0:0006576 | <1e-4 | sl11086 | G0:0003674 | <1e-4 | sl11583 | G0:0003824 | 0.2837 |
| sl11630 | G0:0051818 | <1e-4 | slr1273 | G0:0055082 | <1e-4 | sl10763 | G0:0051246 | <1e-4 | slr1195 | G0:0022838 | <1e-4 | sl11319 | G0:0003824 | 0.2837 |
| sl18012 | G0:0008150 | <1e-4 | slr7091 | G0:0019752 | <1e-4 | slr1066 | G0:0080090 | <1e-4 | slr2084 | G0:0016462 | <1e-4 | slr1990 | G0:0003824 | 0.2837 |
| sl10802 | G0:0044003 | <1e-4 | sl10810 | G0:0009123 | <1e-4 | slr1914 | G0:0009199 | <1e-4 | slr1977 | G0:0016746 | <1e-4 | sl18019 | G0:0003824 | 0.2837 |
| sl10543 | G0:0043933 | <1e-4 | sl11251 | G0:0044260 | <1e-4 | slr1940 | G0:0048519 | <1e-4 | sl11512 | G0:0022892 | <1e-4 | slr5053 | G0:0003824 | 0.2837 |
| sl10499 | G0:0031326 | <1e-4 | sl11714 | G0:0048519 | <1e-4 | slr1378 | G0:0019222 | <1e-4 | ssr3570 | G0:0022838 | <1e-4 | slr6029 | G0:0003824 | 0.2837 |
| sl11163 | G0:0031326 | <1e-4 | ss10467 | G0:0071841 | <1e-4 | sl11926 | G0:0046128 | <1e-4 | sl15003 | G0:0043167 | <1e-4 | sl11164 | G0:0003824 | 0.2837 |
| slr0852 | G0:0006811 | <1e-4 | ssr0692 | G0:0044281 | <1e-4 | slr0670 | G0:0009259 | <1e-4 | slr0510 | G0:0016462 | <1e-4 | slr5073 | G0:0003824 | 0.2837 |
| slr0364 | G0:0065007 | <1e-4 | sl11254 | G0:0006163 | <1e-4 | slr6051 | G0:0044281 | <1e-4 | slr0496 | G0:0005342 | <1e-4 | sl11681 | G0:0003824 | 0.2837 |
| ssr2787 | G0:0006576 | <1e-4 | sl15032 | G0:0009165 | <1e-4 | ss11004 | G0:0042455 | <1e-4 | slr0503 | G0:0016746 | <1e-4 | ss17022 | G0:0003824 | 0.2837 |
| ss15099 | G0:0046164 | <1e-4 | slr1339 | G0:0051188 | <1e-4 | slr1913 | G0:0065007 | <1e-4 | slr0362 | G0:0003674 | <1e-4 | ss15068 | G0:0003824 | 0.2837 |
| slr0962 | G0:0051818 | <1e-4 | sl11240 | G0:0044248 | <1e-4 | slr1142 | G0:0006733 | <1e-4 | slr1533 | G0:0022890 | <1e-4 | ss15114 | G0:0003824 | 0.2837 |
| sl10751 | G0:0046394 | <1e-4 | slr0496 | G0:0044260 | <1e-4 | sl10442 | G0:0055114 | <1e-4 | sl11834 | G0:0022892 | <1e-4 | ss12814 | G0:0003824 | 0.2837 |
| sl11763 | G0:0045184 | <1e-4 | slr6008 | G0:0016053 | <1e-4 | ss10788 | G0:0048519 | <1e-4 | sl11173 | G0:0008171 | <1e-4 | sl10376 | G0:0003824 | 0.2837 |
| slr0656 | G0:0006753 | <1e-4 | sl10933 | G0:0019637 | <1e-4 | slr1956 | G0:0010556 | <1e-4 | slr1627 | G0:0015077 | <1e-4 | sl11898 | G0:0003824 | 0.2837 |
| slr0596 | G0:0051171 | <1e-4 | sl15089 | G0:0034641 | <1e-4 | ssr6026 | G0:0065007 | <1e-4 | sl11925 | G0:0022857 | <1e-4 | slr0888 | G0:0003824 | 0.2837 |
| sl11442 | G0:0072522 | <1e-4 | slr0480 | G0:0019219 | <1e-4 | sl15003 | G0:0046164 | <1e-4 | slr1648 | G0:0015293 | <1e-4 | sl10736 | G0:0003824 | 0.2837 |
| sl10156 | G0:0043412 | <1e-4 | slr6071 | G0:0009124 | <1e-4 | ssr1155 | G0:0042451 | <1e-4 | slr0168 | G0:0005342 | <1e-4 | sl11915 | G0:0003824 | 0.2837 |
| slr1674 | G0:0034641 | <1e-4 | sl10996 | G0:0005996 | <1e-4 | slr1505 | G0:0009309 | <1e-4 | sl10376 | G0:0016818 | <1e-4 | ss11046 | G0:0003824 | 0.2837 |
| slr0169 | G0:0019751 | <1e-4 | slr6021 | G0:0006811 | <1e-4 | slr1911 | G0:0006066 | <1e-4 | slr0869 | G0:0022857 | <1e-4 | ssr5121 | G0:0003824 | 0.2837 |
| sl10372 | G0:0009260 | <1e-4 | ssr2802 | G0:0044271 | <1e-4 | sl11142 | G0:0071841 | <1e-4 | sl17006 | G0:0022803 | <1e-4 | sl10696 | G0:0003824 | 0.2837 |
| sl11752 | G0:0009892 | <1e-4 | sl11344 | G0:0043170 | <1e-4 | sl11738 | G0:0031323 | <1e-4 | sl11511 | G0:0022890 | <1e-4 | sl17086 | G0:0003824 | 0.2837 |
| ssr0332 | G0:0042451 | <1e-4 | sl10886 | G0:0055086 | <1e-4 | sl11068 | G0:0009150 | <1e-4 | slr2027 | G0:0016462 | <1e-4 | ss17021 | G0:0003824 | 0.2837 |
| sl17031 | G0:0006793 | <1e-4 | sl11052 | G0:0019751 | <1e-4 | slr0637 | G0:0006732 | <1e-4 | ssr6019 | G0:0015267 | <1e-4 | slr1290 | G0:0003824 | 0.2837 |
| slr1103 | G0:0006732 | <1e-4 | sl15026 | G0:0090304 | <1e-4 | slr0217 | G0:0072528 | <1e-4 | slr1259 | G0:0015077 | <1e-4 | sl10847 | G0:0003824 | 0.2837 |
| sl11188 | G0:0005996 | <1e-4 | slr1495 | G0:0048523 | <1e-4 | slr1923 | G0:0051818 | <1e-4 | slr0780 | G0:0022890 | <1e-4 | ssr0657 | G0:0003824 | 0.2837 |
| sl11640 | G0:0006082 | <1e-4 | sl10448 | G0:0043170 | <1e-4 | ssr6030 | G0:0051347 | <1e-4 | ss13829 | G0:0022803 | <1e-4 | slr6045 | G0:0003824 | 0.2837 |
| ss15031 | G0:0009126 | <1e-4 | ss11792 | G0:0009124 | <1e-4 | sl10283 | G0:0009893 | <1e-4 | slr1260 | G0:0015405 | <1e-4 | ss11690 | G0:0003824 | 0.2837 |
| sl11192 | G0:0009987 | <1e-4 | sl10931 | G0:0051171 | <1e-4 | ssr3154 | G0:0034654 | <1e-4 | sl11247 | G0:0016741 | <1e-4 | sl17006 | G0:0003824 | 0.2837 |
| sl10359 | G0:0009150 | <1e-4 | slr1449 | G0:0009161 | <1e-4 | sl10839 | G0:0009889 | <1e-4 | sl11912 | G0:0016817 | <1e-4 | ssr3129 | G0:0003824 | 0.2837 |
| slr2025 | G0:0018130 | <1e-4 | sl11773 | G0:0034654 | <1e-4 | slr0634 | G0:0009161 | <1e-4 | sl10996 | G0:0008171 | <1e-4 | ss15008 | G0:0003824 | 0.2837 |
| sl10350 | G0:0006576 | <1e-4 | ssr3571 | G0:0050794 | <1e-4 | sl11036 | G0:0009309 | <1e-4 | ss12069 | G0:0022832 | <1e-4 | ssr6086 | G0:0003824 | 0.2837 |
| sl10263 | G0:0009142 | <1e-4 | sl10443 | G0:0050794 | <1e-4 | sl10857 | G0:0046483 | <1e-4 | slr7059 | G0:0016746 | <1e-4 | slr2052 | G0:0003824 | 0.2837 |
| sl10372 | G0:0051171 | <1e-4 | ss15098 | G0:0009150 | <1e-4 | slr0924 | G0:0048518 | <1e-4 | slr1862 | G0:0022836 | <1e-4 | slr1206 | G0:0003824 | 0.2837 |
| slr1670 | G0:0051818 | <1e-4 | sl10641 | G0:0051234 | <1e-4 | slr0650 | G0:0009124 | <1e-4 | sl11388 | G0:0015077 | <1e-4 | slr1624 | G0:0003824 | 0.2837 |
| ssr2553 | G0:0034641 | <1e-4 | slr0784 | G0:0065007 | <1e-4 | slr0924 | G0:0072528 | <1e-4 | slr0489 | G0:0022892 | <1e-4 | sl10031 | G0:0003824 | 0.2837 |
| slr5118 | G0:0009199 | <1e-4 | slr0692 | G0:0048522 | <1e-4 | slr0780 | G0:0044283 | <1e-4 | slr1862 | G0:0016746 | <1e-4 | sl11068 | G0:0003824 | 0.2837 |
| sl11939 | G0:0050789 | <1e-4 | slr0362 | G0:0031640 | <1e-4 | slr0482 | G0:0006091 | <1e-4 | sl10732 | G0:0015405 | <1e-4 | ssr1768 | G0:0003824 | 0.2837 |
| slr1215 | G0:0071841 | <1e-4 | slr1638 | G0:0071496 | <1e-4 | sl10872 | G0:0009144 | <1e-4 | slr0211 | G0:0015075 | <1e-4 | ss18028 | G0:0003824 | 0.2837 |
| sl10781 | G0:0031323 | <1e-4 | slr1032 | G0:0090304 | <1e-4 | sl10498 | G0:0009260 | <1e-4 | slr1774 | G0:0016818 | <1e-4 | slr0816 | G0:0003824 | 0.2837 |
| sl10552 | G0:0051171 | <1e-4 | sl18007 | G0:0005996 | <1e-4 | sl17070 | G0:0055114 | <1e-4 | sl11606 | G0:0022892 | <1e-4 | slr2071 | G0:0003824 | 0.2837 |
| sl11461 | G0:0051716 | <1e-4 | ssr6002 | G0:0009889 | <1e-4 | slr6103 | G0:0051179 | <1e-4 | sl11186 | G0:0022892 | <1e-4 | sl11495 | G0:0003824 | 0.2837 |
| slr1918 | G0:0016052 | <1e-4 | slr0876 | G0:0034641 | <1e-4 | ssr1766 | G0:0071554 | <1e-4 | ss12920 | G0:0003674 | <1e-4 | ssr6030 | G0:0003824 | 0.2837 |
| ss15113 | G0:0022411 | <1e-4 | slr6075 | G0:0016052 | <1e-4 | slr1143 | G0:0048523 | <1e-4 | slr0476 | G0:0015293 | <1e-4 | slr5024 | G0:0003824 | 0.2837 |



|         |            |       |         |            |       |         |            |       |         |            |       |         |            |        |
|---------|------------|-------|---------|------------|-------|---------|------------|-------|---------|------------|-------|---------|------------|--------|
| ssr3570 | G0:0065007 | <1e-4 | ssr2201 | G0:0051171 | <1e-4 | slr0498 | G0:0050794 | <1e-4 | slr1530 | G0:0016746 | <1e-4 | slr0416 | G0:0003824 | 0.2837 |
| slr1425 | G0:0005996 | <1e-4 | slr7102 | G0:0042451 | <1e-4 | slr0006 | G0:0009123 | <1e-4 | slr1177 | G0:0022857 | <1e-4 | ssr2318 | G0:0003824 | 0.2837 |
| sl11062 | G0:0009262 | <1e-4 | sl11680 | G0:0001932 | <1e-4 | sl15030 | G0:0022607 | <1e-4 | slr0294 | G0:0015267 | <1e-4 | ss13573 | G0:0003824 | 0.2837 |
| sl11373 | G0:0019637 | <1e-4 | slr1161 | G0:0060255 | <1e-4 | sl11318 | G0:0080090 | <1e-4 | slr1628 | G0:0060089 | <1e-4 | sl10552 | G0:0003824 | 0.2837 |
| sl11350 | G0:0019222 | <1e-4 | slr0625 | G0:0052111 | <1e-4 | slr7037 | G0:0042455 | <1e-4 | ss16092 | G0:0016817 | <1e-4 | ssr3570 | G0:0003824 | 0.2837 |
| slr0680 | G0:0048878 | <1e-4 | sl10280 | G0:0090304 | <1e-4 | slr1603 | G0:0009132 | <1e-4 | slr0924 | G0:0060089 | <1e-4 | slr6022 | G0:0003824 | 0.2837 |
| slr1618 | G0:0009161 | <1e-4 | slr1544 | G0:0034654 | <1e-4 | slr0299 | G0:0044255 | <1e-4 | sl11155 | G0:0015293 | <1e-4 | slr0699 | G0:0003824 | 0.2837 |
| slr0337 | G0:0009991 | <1e-4 | slr0023 | G0:0022607 | <1e-4 | sl11372 | G0:0051188 | <1e-4 | ssr0761 | G0:0015291 | <1e-4 | ssr7084 | G0:0003824 | 0.2837 |
| sl10297 | G0:0048878 | <1e-4 | sl10413 | G0:0051179 | <1e-4 | slr0664 | G0:0046128 | <1e-4 | ss12009 | G0:0022857 | <1e-4 | ssr3572 | G0:0003824 | 0.2837 |
| slr1241 | G0:0008150 | <1e-4 | slr0366 | G0:0006811 | <1e-4 | sl11638 | G0:0072521 | <1e-4 | slr0049 | G0:0016818 | <1e-4 | sl10749 | G0:0003824 | 0.2837 |
| sl11203 | G0:0034654 | <1e-4 | slr6005 | G0:0044271 | <1e-4 | sl10761 | G0:0051716 | <1e-4 | ss17048 | G0:0003674 | <1e-4 | slr1911 | G0:0003824 | 0.2837 |
| ssr2067 | G0:0051347 | <1e-4 | slr1807 | G0:0018130 | <1e-4 | sl11315 | G0:0034641 | <1e-4 | sl11095 | G0:0022892 | <1e-4 | ssr7017 | G0:0003824 | 0.2837 |
| sl10802 | G0:0072528 | <1e-4 | sl10905 | G0:0055114 | <1e-4 | slr2119 | G0:0051234 | <1e-4 | slr1276 | G0:0015399 | <1e-4 | sl18027 | G0:0003824 | 0.2837 |
| slr1339 | G0:0008150 | <1e-4 | slr0769 | G0:0009165 | <1e-4 | sl10787 | G0:0006753 | <1e-4 | ss12245 | G0:0015077 | <1e-4 | sl17028 | G0:0003824 | 0.2837 |
| slr0554 | G0:0009259 | <1e-4 | slr1816 | G0:0043412 | <1e-4 | slr0813 | G0:0071841 | <1e-4 | slr1436 | G0:0016746 | <1e-4 | slr0731 | G0:0003824 | 0.2837 |
| sl10183 | G0:0090304 | <1e-4 | sl15030 | G0:0044260 | <1e-4 | sl10160 | G0:0051186 | <1e-4 | sl10066 | G0:0022832 | <1e-4 | slr0812 | G0:0003824 | 0.2837 |
| slr1807 | G0:0044106 | <1e-4 | slr0092 | G0:0043648 | <1e-4 | sl10503 | G0:0080090 | <1e-4 | slr1670 | G0:0015405 | <1e-4 | slr2003 | G0:0003824 | 0.2837 |
| sl11613 | G0:0006631 | <1e-4 | slr5102 | G0:0051716 | <1e-4 | slr0692 | G0:0034654 | <1e-4 | sl17064 | G0:0043167 | <1e-4 | ssr6027 | G0:0003824 | 0.2837 |
| sl15090 | G0:0009394 | <1e-4 | slr6029 | G0:0051171 | <1e-4 | ss17074 | G0:0006721 | <1e-4 | slr7081 | G0:0042623 | <1e-4 | sl11609 | G0:0003824 | 0.2837 |
| slr0483 | G0:0051188 | <1e-4 | slr1913 | G0:0019219 | <1e-4 | slr1790 | G0:0034654 | <1e-4 | slr1441 | G0:0022892 | <1e-4 | sl10765 | G0:0003824 | 0.2837 |
| slr1880 | G0:0044283 | <1e-4 | slr1110 | G0:0009987 | <1e-4 | slr0553 | G0:0009893 | <1e-4 | slr0269 | G0:0003674 | <1e-4 | slr0667 | G0:0003824 | 0.2837 |
| slr0303 | G0:0055086 | <1e-4 | sl11873 | G0:0046394 | <1e-4 | ss15027 | G0:0044248 | <1e-4 | ssr2049 | G0:0022803 | <1e-4 | sl11307 | G0:0003824 | 0.2837 |
| slr1415 | G0:0042180 | <1e-4 | slr0670 | G0:0009893 | <1e-4 | ssr0332 | G0:0006082 | <1e-4 | sl11691 | G0:0022891 | <1e-4 | sl17034 | G0:0003824 | 0.2837 |
| ss15027 | G0:0080090 | <1e-4 | slr0619 | G0:0034654 | <1e-4 | slr1563 | G0:0019637 | <1e-4 | sl10913 | G0:0015405 | <1e-4 | slr5127 | G0:0003824 | 0.2837 |
| slr0516 | G0:0072524 | <1e-4 | slr2070 | G0:0006066 | <1e-4 | sl11378 | G0:0009117 | <1e-4 | slr1544 | G0:0015075 | <1e-4 | slr1114 | G0:0003824 | 0.2837 |
| sl11142 | G0:0072521 | <1e-4 | ssr6078 | G0:0009144 | <1e-4 | slr5126 | G0:0019637 | <1e-4 | slr5018 | G0:0015291 | <1e-4 | sl11095 | G0:0003824 | 0.2837 |
| slr1240 | G0:0009150 | <1e-4 | slr1071 | G0:0042180 | <1e-4 | slr0362 | G0:0006066 | <1e-4 | ss11918 | G0:0016741 | <1e-4 | ss17074 | G0:0003824 | 0.2837 |
| slr6004 | G0:0046164 | <1e-4 | slr1474 | G0:0043436 | <1e-4 | slr1762 | G0:0006091 | <1e-4 | sl11373 | G0:0016818 | <1e-4 | slr1577 | G0:0003824 | 0.2837 |
| sl10787 | G0:0043933 | <1e-4 | sl11509 | G0:0006576 | <1e-4 | sl10473 | G0:0009117 | <1e-4 | ssr1256 | G0:0015293 | <1e-4 | slr0730 | G0:0003824 | 0.2837 |
| slr0670 | G0:0009165 | <1e-4 | sgl0001 | G0:0019637 | <1e-4 | sl17034 | G0:0050794 | <1e-4 | ssr5106 | G0:0022857 | <1e-4 | sl10858 | G0:0003824 | 0.2837 |
| slr2000 | G0:0060255 | <1e-4 | sl10447 | G0:0022411 | <1e-4 | slr6071 | G0:0016052 | <1e-4 | sl10854 | G0:0060089 | <1e-4 | slr6044 | G0:0003824 | 0.2837 |
| ssr8013 | G0:0001932 | <1e-4 | sl10482 | G0:0019219 | <1e-4 | slr7023 | G0:0006732 | <1e-4 | sl10932 | G0:0015267 | <1e-4 | ss11263 | G0:0003824 | 0.2837 |
| sl11925 | G0:0072527 | <1e-4 | sl10564 | G0:0071841 | <1e-4 | slr0146 | G0:0009308 | <1e-4 | sl10157 | G0:0015293 | <1e-4 | slr1394 | G0:0003824 | 0.2837 |
| slr0366 | G0:0009308 | <1e-4 | sl17050 | G0:0071842 | <1e-4 | slr1513 | G0:0009165 | <1e-4 | ss11918 | G0:0015075 | <1e-4 | slr0013 | G0:0003824 | 0.2837 |
| ssr1698 | G0:0044003 | <1e-4 | sl10286 | G0:0006631 | <1e-4 | sl10552 | G0:0051188 | <1e-4 | sl17078 | G0:0015267 | <1e-4 | sl11717 | G0:0003824 | 0.2837 |
| slr6051 | G0:0009057 | <1e-4 | ss10353 | G0:0051347 | <1e-4 | sl10508 | G0:0046164 | <1e-4 | sl10148 | G0:0043167 | <1e-4 | sl18011 | G0:0003824 | 0.2837 |
| slr1917 | G0:0009308 | <1e-4 | ss11300 | G0:0009259 | <1e-4 | slr5116 | G0:0050801 | <1e-4 | ssr0759 | G0:0015077 | <1e-4 | sl10101 | G0:0003824 | 0.2837 |
| sl10263 | G0:0009889 | <1e-4 | sl11193 | G0:0016053 | <1e-4 | slr1603 | G0:0009309 | <1e-4 | sl11052 | G0:0022891 | <1e-4 | ss15100 | G0:0003824 | 0.2837 |
| slr1174 | G0:0048523 | <1e-4 | slr7096 | G0:0048523 | <1e-4 | ss12717 | G0:0044106 | <1e-4 | slr2005 | G0:0015405 | <1e-4 | ssr2975 | G0:0003824 | 0.2837 |
| slr0784 | G0:0031323 | <1e-4 | sl10847 | G0:0042180 | <1e-4 | sl11340 | G0:0043170 | <1e-4 | slr1530 | G0:0022838 | <1e-4 | ssr2047 | G0:0003824 | 0.2837 |
| slr1353 | G0:0055082 | <1e-4 | slr1178 | G0:0006066 | <1e-4 | slr1816 | G0:0016053 | <1e-4 | ss11498 | G0:0015075 | <1e-4 | sl10565 | G0:0003824 | 0.2837 |
| sl11866 | G0:0051171 | <1e-4 | sl15004 | G0:0006721 | <1e-4 | sl11191 | G0:0034641 | <1e-4 | slr0109 | G0:0015293 | <1e-4 | sl11009 | G0:0008152 | 0.2109 |
| sl10280 | G0:0072524 | <1e-4 | ss15008 | G0:0033013 | <1e-4 | sl11735 | G0:0048878 | <1e-4 | sl11681 | G0:0015267 | <1e-4 | sl18027 | G0:0008152 | 0.2109 |
| slr0241 | G0:0044283 | <1e-4 | slr2000 | G0:0044260 | <1e-4 | sl10847 | G0:0044248 | <1e-4 | slr1186 | G0:0022857 | <1e-4 | sl11192 | G0:0008152 | 0.2109 |
| slr1110 | G0:0005996 | <1e-4 | slr0217 | G0:0048523 | <1e-4 | slr1815 | G0:0051716 | <1e-4 | sl10149 | G0:0022836 | <1e-4 | ssr3467 | G0:0008152 | 0.2109 |
| sl11411 | G0:0019637 | <1e-4 | slr1660 | G0:0009308 | <1e-4 | sl10176 | G0:0006066 | <1e-4 | ss11498 | G0:0015267 | <1e-4 | ss17042 | G0:0008152 | 0.2109 |
| slr1142 | G0:0034660 | <1e-4 | sl11511 | G0:0001932 | <1e-4 | sl11613 | G0:0051716 | <1e-4 | slr0358 | G0:0016818 | <1e-4 | sl15067 | G0:0008152 | 0.2109 |
| slr6103 | G0:0048518 | <1e-4 | slr0455 | G0:0045184 | <1e-4 | slr1436 | G0:0022411 | <1e-4 | sl10249 | G0:0015291 | <1e-4 | slr0670 | G0:0008152 | 0.2109 |
| slr1339 | G0:0022607 | <1e-4 | sl10898 | G0:0048878 | <1e-4 | ss10787 | G0:0006753 | <1e-4 | ssr0336 | G0:0016741 | <1e-4 | sl15003 | G0:0008152 | 0.2109 |
| slr1406 | G0:0009309 | <1e-4 | sl15030 | G0:0019752 | <1e-4 | slr2032 | G0:0006066 | <1e-4 | sl17090 | G0:0022838 | <1e-4 | slr8021 | G0:0008152 | 0.2109 |
| ss17021 | G0:0051186 | <1e-4 | slr1431 | G0:0034641 | <1e-4 | slr1690 | G0:0009889 | <1e-4 | ssr0102 | G0:0015077 | <1e-4 | sl10765 | G0:0008152 | 0.2109 |
| slr1413 | G0:0080090 | <1e-4 | slr5024 | G0:0045184 | <1e-4 | ssr0336 | G0:0051234 | <1e-4 | sl10788 | G0:0022857 | <1e-4 | slr5016 | G0:0008152 | 0.2109 |
| ss15008 | G0:0060255 | <1e-4 | slr1573 | G0:0031640 | <1e-4 | slr5037 | G0:0072522 | <1e-4 | ss12065 | G0:0022890 | <1e-4 | sl17067 | G0:0008152 | 0.2109 |
| sl11355 | G0:0043549 | <1e-4 | slr6068 | G0:0050801 | <1e-4 | sl10360 | G0:0019219 | <1e-4 | ss13382 | G0:0015399 | <1e-4 | slr1563 | G0:0008152 | 0.2109 |

|         |            |       |         |            |       |         |            |       |         |            |       |         |            |        |
|---------|------------|-------|---------|------------|-------|---------|------------|-------|---------|------------|-------|---------|------------|--------|
| sl12013 | G0:0046164 | <1e-4 | slr6047 | G0:0042451 | <1e-4 | ssl1690 | G0:0006732 | <1e-4 | sl10911 | G0:0016746 | <1e-4 | slr0699 | G0:0008152 | 0.2109 |
| slr0184 | G0:0071841 | <1e-4 | ssr5106 | G0:0009144 | <1e-4 | slr1762 | G0:0042180 | <1e-4 | slr1406 | G0:0008171 | <1e-4 | slr7057 | G0:0008152 | 0.2109 |
| ssr3570 | G0:0044260 | <1e-4 | slr2000 | G0:0009132 | <1e-4 | slr0392 | G0:0031326 | <1e-4 | slr1636 | G0:0015267 | <1e-4 | sl11188 | G0:0008152 | 0.2109 |
| sl11891 | G0:0065007 | <1e-4 | sl10860 | G0:0045184 | <1e-4 | sl10297 | G0:0050794 | <1e-4 | sl11608 | G0:0022891 | <1e-4 | slr7071 | G0:0008152 | 0.2109 |
| slr1577 | G0:0008150 | <1e-4 | sl11749 | G0:0008610 | <1e-4 | sl11052 | G0:0006082 | <1e-4 | sl10532 | G0:0060089 | <1e-4 | slr0313 | G0:0008152 | 0.2109 |
| slr0263 | G0:0071842 | <1e-4 | slr0821 | G0:0044106 | <1e-4 | sl10913 | G0:0022411 | <1e-4 | slr0423 | G0:0060089 | <1e-4 | slr6045 | G0:0008152 | 0.2109 |
| sl10659 | G0:0008150 | <1e-4 | sl12007 | G0:0022411 | <1e-4 | slr1875 | G0:0051188 | <1e-4 | slr0106 | G0:0022892 | <1e-4 | slr1789 | G0:0008152 | 0.2109 |
| sl10400 | G0:0072528 | <1e-4 | slr1025 | G0:0009142 | <1e-4 | slr5018 | G0:0065007 | <1e-4 | ssl0294 | G0:0016746 | <1e-4 | sl10565 | G0:0008152 | 0.2109 |
| slr1690 | G0:0050801 | <1e-4 | sl10614 | G0:0055082 | <1e-4 | ssl2471 | G0:0009394 | <1e-4 | sl10939 | G0:0016746 | <1e-4 | slr1438 | G0:0008152 | 0.2109 |
| sl10174 | G0:0051234 | <1e-4 | slr1183 | G0:0009987 | <1e-4 | slr1362 | G0:0042455 | <1e-4 | slr1570 | G0:0043492 | <1e-4 | sl10031 | G0:0008152 | 0.2109 |
| sl11247 | G0:0051186 | <1e-4 | slr0569 | G0:0009161 | <1e-4 | sl10703 | G0:0016052 | <1e-4 | ssr6002 | G0:0022836 | <1e-4 | ssl0788 | G0:0008152 | 0.2109 |
| slr0592 | G0:0045184 | <1e-4 | sl11737 | G0:0060255 | <1e-4 | slr1397 | G0:0009132 | <1e-4 | slr0731 | G0:0015405 | <1e-4 | sl10253 | G0:0008152 | 0.2109 |
| slr5016 | G0:0052188 | <1e-4 | slr5116 | G0:0006066 | <1e-4 | sl10827 | G0:0043648 | <1e-4 | slr1778 | G0:0015077 | <1e-4 | slr1990 | G0:0008152 | 0.2109 |
| slr0914 | G0:0009991 | <1e-4 | slr1814 | G0:0048522 | <1e-4 | ssl3549 | G0:0006732 | <1e-4 | slr0957 | G0:0016746 | <1e-4 | ssr0657 | G0:0008152 | 0.2109 |
| slr1648 | G0:0071842 | <1e-4 | ssl7042 | G0:0050801 | <1e-4 | ssl0353 | G0:0052188 | <1e-4 | sl18007 | G0:0015399 | <1e-4 | slr1599 | G0:0008152 | 0.2109 |
| slr2049 | G0:0001932 | <1e-4 | ssl0750 | G0:0009987 | <1e-4 | slr0109 | G0:0009987 | <1e-4 | sl11192 | G0:0015399 | <1e-4 | ssr6019 | G0:0008152 | 0.2109 |
| slr6028 | G0:0006576 | <1e-4 | sl10749 | G0:0071554 | <1e-4 | slr0769 | G0:0044260 | <1e-4 | ssr3304 | G0:0022803 | <1e-4 | slr0613 | G0:0008152 | 0.2109 |
| slr1660 | G0:0006163 | <1e-4 | sl10085 | G0:0009889 | <1e-4 | slr1276 | G0:0043933 | <1e-4 | slr1098 | G0:0022892 | <1e-4 | ssr1473 | G0:0008152 | 0.2109 |
| sl10354 | G0:0044260 | <1e-4 | sl11942 | G0:0009126 | <1e-4 | sl11340 | G0:0042180 | <1e-4 | slr0195 | G0:0022857 | <1e-4 | sl11698 | G0:0008152 | 0.2109 |
| slr0345 | G0:0072527 | <1e-4 | sl11267 | G0:0031640 | <1e-4 | slr1611 | G0:0009892 | <1e-4 | slr2070 | G0:0016746 | <1e-4 | sl18040 | G0:0008152 | 0.2109 |
| slr2080 | G0:0009144 | <1e-4 | sl10702 | G0:0051818 | <1e-4 | sl11862 | G0:0072527 | <1e-4 | slr0609 | G0:0016462 | <1e-4 | ssl5091 | G0:0008152 | 0.2109 |
| slr6104 | G0:0006732 | <1e-4 | sl10085 | G0:0072528 | <1e-4 | ssr0332 | G0:0043933 | <1e-4 | slr1174 | G0:0022832 | <1e-4 | slr0888 | G0:0008152 | 0.2109 |
| sl10802 | G0:0046128 | <1e-4 | slr7102 | G0:0052111 | <1e-4 | sl15063 | G0:0034654 | <1e-4 | slr0521 | G0:0016746 | <1e-4 | slr0300 | G0:0008152 | 0.2109 |
| ssl7045 | G0:0009141 | <1e-4 | sl11950 | G0:0018130 | <1e-4 | sl10645 | G0:0043170 | <1e-4 | sl10496 | G0:0016462 | <1e-4 | ssr3572 | G0:0008152 | 0.2109 |
| sl10488 | G0:0046483 | <1e-4 | sl11601 | G0:0009141 | <1e-4 | slr0981 | G0:0009144 | <1e-4 | slr5012 | G0:0005342 | <1e-4 | slr1670 | G0:0008152 | 0.2109 |
| ssl0109 | G0:0008150 | <1e-4 | slr0269 | G0:0046164 | <1e-4 | sl11186 | G0:0048519 | <1e-4 | ssl5114 | G0:0016462 | <1e-4 | ssl0410 | G0:0008152 | 0.2109 |
| slr1261 | G0:0072524 | <1e-4 | slr1104 | G0:0016052 | <1e-4 | sl11086 | G0:0006721 | <1e-4 | slr1074 | G0:0043167 | <1e-4 | sl10608 | G0:0008152 | 0.2109 |
| slr6049 | G0:0048519 | <1e-4 | ssr5019 | G0:0006721 | <1e-4 | slr0654 | G0:0009056 | <1e-4 | slr6100 | G0:0022857 | <1e-4 | slr0725 | G0:0008152 | 0.2109 |
| slr0456 | G0:0006576 | <1e-4 | slr1977 | G0:0043412 | <1e-4 | sl10586 | G0:0009057 | <1e-4 | slr5013 | G0:0016817 | <1e-4 | ssl0350 | G0:0008152 | 0.2109 |
| slr0924 | G0:0051234 | <1e-4 | ssr5092 | G0:0009260 | <1e-4 | slr0912 | G0:0072522 | <1e-4 | slr1944 | G0:0015399 | <1e-4 | ssr6024 | G0:0008152 | 0.2109 |
| sl10647 | G0:0009394 | <1e-4 | slr1275 | G0:0071842 | <1e-4 | ssr1768 | G0:0044281 | <1e-4 | slr0453 | G0:0005342 | <1e-4 | sl11717 | G0:0008152 | 0.2109 |
| slr1083 | G0:0019637 | <1e-4 | sl11319 | G0:0051716 | <1e-4 | ssl3692 | G0:0052111 | <1e-4 | sl10062 | G0:0003674 | <1e-4 | sl11882 | G0:0008152 | 0.2109 |
| slr1958 | G0:0016054 | <1e-4 | sl15046 | G0:0046128 | <1e-4 | sl16052 | G0:0009987 | <1e-4 | ssl8003 | G0:0015075 | <1e-4 | sl11640 | G0:0008152 | 0.2109 |
| slr0725 | G0:0019219 | <1e-4 | sl11509 | G0:0051179 | <1e-4 | sl10861 | G0:0006721 | <1e-4 | slr0325 | G0:0016817 | <1e-4 | slr1079 | G0:0008152 | 0.2109 |
| sl11853 | G0:0006066 | <1e-4 | sl11068 | G0:0051818 | <1e-4 | slr0637 | G0:0009260 | <1e-4 | sl11251 | G0:0022832 | <1e-4 | sl11891 | G0:0008152 | 0.2109 |
| slr1342 | G0:0009161 | <1e-4 | slr1444 | G0:0009991 | <1e-4 | slr2000 | G0:0001932 | <1e-4 | ssr3122 | G0:0022857 | <1e-4 | sl10670 | G0:0008152 | 0.2109 |
| slr7059 | G0:0045184 | <1e-4 | sl11830 | G0:0006082 | <1e-4 | slr1920 | G0:0006066 | <1e-4 | slr2084 | G0:0003674 | <1e-4 | slr2003 | G0:0008152 | 0.2109 |
| ssr2318 | G0:0034641 | <1e-4 | sl11160 | G0:0050794 | <1e-4 | sl11289 | G0:0010468 | <1e-4 | slr0317 | G0:0060089 | <1e-4 | slr7099 | G0:0008152 | 0.2109 |
| slr5073 | G0:0051234 | <1e-4 | ssr6086 | G0:0046483 | <1e-4 | ssr6026 | G0:0009893 | <1e-4 | slr0909 | G0:0043167 | <1e-4 | sl18011 | G0:0008152 | 0.2109 |
| ssl1046 | G0:0019219 | <1e-4 | sl11135 | G0:0051246 | <1e-4 | sl10691 | G0:0052111 | <1e-4 | slr0491 | G0:0022890 | <1e-4 | sl10162 | G0:0008152 | 0.2109 |
| slr5111 | G0:0072524 | <1e-4 | sl10149 | G0:0008150 | <1e-4 | slr0730 | G0:0044003 | <1e-4 | slr1862 | G0:0022891 | <1e-4 | sl16055 | G0:0008152 | 0.2109 |
| ssl5008 | G0:0009123 | <1e-4 | slr0333 | G0:0046907 | <1e-4 | slr0199 | G0:0019751 | <1e-4 | sl10611 | G0:0022838 | <1e-4 | sl17089 | G0:0008152 | 0.2109 |
| ssl1792 | G0:0042455 | <1e-4 | ssl7045 | G0:0072527 | <1e-4 | sl11352 | G0:0072522 | <1e-4 | slr6044 | G0:0060089 | <1e-4 | sl11570 | G0:0008152 | 0.2109 |
| slr5116 | G0:0042451 | <1e-4 | slr1270 | G0:0046164 | <1e-4 | slr1396 | G0:0065007 | <1e-4 | sl11092 | G0:0015267 | <1e-4 | slr0731 | G0:0008152 | 0.2109 |
| sl17030 | G0:0006720 | <1e-4 | slr0294 | G0:0009262 | <1e-4 | slr1071 | G0:0043549 | <1e-4 | ssl2245 | G0:0015291 | <1e-4 | sl11532 | G0:0008152 | 0.2109 |
| slr0149 | G0:0009056 | <1e-4 | sl10691 | G0:0052188 | <1e-4 | slr0059 | G0:0044271 | <1e-4 | slr5024 | G0:0022832 | <1e-4 | sl10479 | G0:0008152 | 0.2109 |
| slr6101 | G0:0009150 | <1e-4 | slr0038 | G0:0009161 | <1e-4 | sl11630 | G0:0042180 | <1e-4 | slr1852 | G0:0008171 | <1e-4 | slr0885 | G0:0008152 | 0.2109 |
| slr0271 | G0:0051716 | <1e-4 | sl11773 | G0:0043648 | <1e-4 | slr5118 | G0:0006721 | <1e-4 | slr1964 | G0:0022836 | <1e-4 | slr5126 | G0:0008152 | 0.2109 |
| slr1670 | G0:0009260 | <1e-4 | sl10448 | G0:0019222 | <1e-4 | sl10147 | G0:0001932 | <1e-4 | ssl0739 | G0:0015405 | <1e-4 | ssl0704 | G0:0008152 | 0.2109 |
| sl10867 | G0:0009142 | <1e-4 | ssr3572 | G0:0051818 | <1e-4 | slr2111 | G0:0009263 | <1e-4 | slr5102 | G0:0043167 | <1e-4 | ssr2047 | G0:0008152 | 0.2109 |
| sl10608 | G0:0072528 | <1e-4 | sl11542 | G0:0043436 | <1e-4 | sl18035 | G0:0019222 | <1e-4 | ssr0759 | G0:0022832 | <1e-4 | slr0270 | G0:0008152 | 0.2109 |
| slr0250 | G0:0010556 | <1e-4 | sl11173 | G0:0072528 | <1e-4 | sl11749 | G0:0044282 | <1e-4 | ssr2802 | G0:0016818 | <1e-4 | sl11832 | G0:0008152 | 0.2109 |
| ssr5011 | G0:0009056 | <1e-4 | ssr2754 | G0:0055082 | <1e-4 | sl11399 | G0:0019222 | <1e-4 | ssr1155 | G0:0005342 | <1e-4 | slr2004 | G0:0008152 | 0.2109 |
| sl10436 | G0:0072528 | <1e-4 | slr0393 | G0:0048523 | <1e-4 | slr6051 | G0:0009263 | <1e-4 | sl10564 | G0:0015077 | <1e-4 | ssl2069 | G0:0008152 | 0.2109 |

|         |            |       |         |            |       |         |            |       |         |            |       |         |            |        |
|---------|------------|-------|---------|------------|-------|---------|------------|-------|---------|------------|-------|---------|------------|--------|
| slr2011 | G0:0042451 | <1e-4 | ssl7046 | G0:0048518 | <1e-4 | slr8014 | G0:0009161 | <1e-4 | sl11239 | G0:0022857 | <1e-4 | slr1886 | G0:0008152 | 0.2109 |
| sl11355 | G0:0033013 | <1e-4 | sl10174 | G0:0009117 | <1e-4 | slr1998 | G0:0044003 | <1e-4 | sl11151 | G0:0003674 | <1e-4 | slr0498 | G0:0008152 | 0.2109 |
| sl11658 | G0:0009889 | <1e-4 | sl10498 | G0:0042451 | <1e-4 | slr6090 | G0:0042180 | <1e-4 | ssr7036 | G0:0022803 | <1e-4 | ssr2802 | G0:0008152 | 0.2109 |
| slr2048 | G0:0009057 | <1e-4 | slr1577 | G0:0009161 | <1e-4 | slr2027 | G0:0043549 | <1e-4 | slr0049 | G0:0005342 | <1e-4 | sl15128 | G0:0008152 | 0.2109 |
| slr0285 | G0:0006631 | <1e-4 | slr1162 | G0:0009124 | <1e-4 | ssr3409 | G0:0006733 | <1e-4 | slr1066 | G0:0022803 | <1e-4 | ss15015 | G0:0008152 | 0.2109 |
| ssr2554 | G0:0046164 | <1e-4 | slr0498 | G0:0051716 | <1e-4 | ssl3573 | G0:0019751 | <1e-4 | sl11761 | G0:0043492 | <1e-4 | ssl3615 | G0:0008152 | 0.2109 |
| slr0740 | G0:0009126 | <1e-4 | sl10183 | G0:0009987 | <1e-4 | ss10750 | G0:0009308 | <1e-4 | slr2110 | G0:0016746 | <1e-4 | slr0590 | G0:0008152 | 0.2109 |
| slr0341 | G0:0019637 | <1e-4 | ssr6089 | G0:0046164 | <1e-4 | slr6009 | G0:0060255 | <1e-4 | sl11736 | G0:0008171 | <1e-4 | sl11089 | G0:0008152 | 0.2109 |
| slr1170 | G0:0043648 | <1e-4 | slr1541 | G0:0072528 | <1e-4 | slr0806 | G0:0009123 | <1e-4 | sl10609 | G0:0015267 | <1e-4 | slr1450 | G0:0008152 | 0.2109 |
| slr0976 | G0:0072524 | <1e-4 | ssr2422 | G0:0048522 | <1e-4 | slr0142 | G0:0048519 | <1e-4 | sl10297 | G0:0015075 | <1e-4 | ssl3573 | G0:0008152 | 0.2109 |
| sl10405 | G0:0065007 | <1e-4 | sl10611 | G0:0009263 | <1e-4 | sl10218 | G0:0006793 | <1e-4 | sl11906 | G0:0015077 | <1e-4 | slr1807 | G0:0008152 | 0.2109 |
| slr1397 | G0:0043648 | <1e-4 | sl11511 | G0:0009141 | <1e-4 | sl11552 | G0:0009308 | <1e-4 | ssr2551 | G0:0016817 | <1e-4 | slr1507 | G0:0008152 | 0.2109 |
| sl15030 | G0:0031323 | <1e-4 | sl10590 | G0:0031326 | <1e-4 | sl10325 | G0:0051171 | <1e-4 | sl11086 | G0:0022890 | <1e-4 | slr1935 | G0:0008152 | 0.2109 |
| sl17064 | G0:0042455 | <1e-4 | slr2073 | G0:0051179 | <1e-4 | sl10162 | G0:0051171 | <1e-4 | sl10410 | G0:0022891 | <1e-4 | sl11702 | G0:0008152 | 0.2109 |
| sl11188 | G0:0071554 | <1e-4 | slr6044 | G0:0010468 | <1e-4 | slr0912 | G0:0034641 | <1e-4 | slr0337 | G0:0042623 | <1e-4 | sl11049 | G0:0008152 | 0.2109 |
| sl10068 | G0:0009260 | <1e-4 | sl10314 | G0:0010468 | <1e-4 | ssl5095 | G0:0010556 | <1e-4 | slr1590 | G0:0008171 | <1e-4 | slr1206 | G0:0008152 | 0.2109 |
| ssr0692 | G0:0034660 | <1e-4 | ssr2201 | G0:0006091 | <1e-4 | sl10149 | G0:0009150 | <1e-4 | slr1800 | G0:0005342 | <1e-4 | slr1790 | G0:0008152 | 0.2109 |
| slr1339 | G0:0048523 | <1e-4 | ssr0109 | G0:0065007 | <1e-4 | ssr2711 | G0:0009262 | <1e-4 | sg10002 | G0:0043167 | <1e-4 | sl11222 | G0:0006810 | 0.2098 |
| slr0976 | G0:0044106 | <1e-4 | ssr3409 | G0:0044281 | <1e-4 | sl10625 | G0:0022607 | <1e-4 | slr0199 | G0:0022832 | <1e-4 | sl11272 | G0:0006810 | 0.2098 |
| slr1660 | G0:0009165 | <1e-4 | slr7010 | G0:0048522 | <1e-4 | ssr2843 | G0:0050896 | <1e-4 | sl11390 | G0:0015399 | <1e-4 | slr0642 | G0:0006810 | 0.2098 |
| sl11530 | G0:0006811 | <1e-4 | sl11495 | G0:0009889 | <1e-4 | slr1431 | G0:0043933 | <1e-4 | ssr1558 | G0:0043492 | <1e-4 | sl11528 | G0:0006810 | 0.2098 |
| slr1074 | G0:0006720 | <1e-4 | sl10786 | G0:0009892 | <1e-4 | slr0453 | G0:0090304 | <1e-4 | sl10661 | G0:0042623 | <1e-4 | sl10149 | G0:0016491 | 0.203  |
| slr0060 | G0:0009117 | <1e-4 | slr1819 | G0:0009124 | <1e-4 | slr1025 | G0:0016054 | <1e-4 | slr1396 | G0:0015075 | <1e-4 | slr1702 | G0:0006810 | 0.2005 |
| sl10811 | G0:0043436 | <1e-4 | slr1484 | G0:0006766 | <1e-4 | slr0112 | G0:0019637 | <1e-4 | ssl0352 | G0:0015405 | <1e-4 | slr0341 | G0:0006810 | 0.2005 |
| slr1186 | G0:0050789 | <1e-4 | sl18001 | G0:0042455 | <1e-4 | sl10872 | G0:0010468 | <1e-4 | slr8022 | G0:0022892 | <1e-4 | slr0491 | G0:0006810 | 0.2005 |
| slr1533 | G0:0044248 | <1e-4 | slr1618 | G0:0046164 | <1e-4 | sl11250 | G0:0016052 | <1e-4 | slr7080 | G0:0022836 | <1e-4 | slr0810 | G0:0006810 | 0.2005 |
| slr1110 | G0:0051186 | <1e-4 | slr0730 | G0:0048518 | <1e-4 | slr1886 | G0:0008150 | <1e-4 | ssr3304 | G0:0008171 | <1e-4 | slr2092 | G0:0006810 | 0.2005 |
| sl10191 | G0:0009059 | <1e-4 | slr6047 | G0:0006766 | <1e-4 | slr1045 | G0:0009059 | <1e-4 | slr7014 | G0:0022832 | <1e-4 | slr1812 | G0:0006810 | 0.1995 |
| ssl3573 | G0:0046164 | <1e-4 | sl10678 | G0:0080090 | <1e-4 | sl10241 | G0:0010468 | <1e-4 | slr0552 | G0:0015293 | <1e-4 | sl10861 | G0:0006810 | 0.1982 |
| sl11285 | G0:0006163 | <1e-4 | slr0374 | G0:0043933 | <1e-4 | slr1189 | G0:0006793 | <1e-4 | ssr3189 | G0:0022836 | <1e-4 | ssl3382 | G0:0006810 | 0.1977 |
| slr0496 | G0:0009987 | <1e-4 | sl11442 | G0:0048522 | <1e-4 | sl11160 | G0:0009262 | <1e-4 | sl11262 | G0:0042623 | <1e-4 | sl10740 | G0:0006810 | 0.1977 |
| slr6016 | G0:0090304 | <1e-4 | sl15089 | G0:0051716 | <1e-4 | slr1866 | G0:0071554 | <1e-4 | slr0730 | G0:0016462 | <1e-4 | ssr2754 | G0:0006810 | 0.1977 |
| sl11511 | G0:0055114 | <1e-4 | slr0818 | G0:0046164 | <1e-4 | sl11009 | G0:0080090 | <1e-4 | slr7094 | G0:0005342 | <1e-4 | slr0272 | G0:0006810 | 0.1977 |
| ssl8039 | G0:0031326 | <1e-4 | sl10611 | G0:0009142 | <1e-4 | sl10168 | G0:0052111 | <1e-4 | slr0172 | G0:0060089 | <1e-4 | slr0742 | G0:0006810 | 0.1977 |
| ssr2848 | G0:0072527 | <1e-4 | slr1505 | G0:0009889 | <1e-4 | sl10867 | G0:0071840 | <1e-4 | slr1918 | G0:0005342 | <1e-4 | sl10147 | G0:0006810 | 0.1977 |
| sl17077 | G0:0001932 | <1e-4 | sl10905 | G0:0050789 | <1e-4 | slr0111 | G0:0006753 | <1e-4 | sl11173 | G0:0016817 | <1e-4 | slr0789 | G0:0006810 | 0.1977 |
| slr7025 | G0:0051716 | <1e-4 | slr1773 | G0:0043648 | <1e-4 | slr0919 | G0:0055086 | <1e-4 | ssr6099 | G0:0022836 | <1e-4 | slr0957 | G0:0006810 | 0.1977 |
| ssr7093 | G0:0052188 | <1e-4 | sl10149 | G0:0019538 | <1e-4 | ssr1499 | G0:0009144 | <1e-4 | sl11225 | G0:0022832 | <1e-4 | sl10188 | G0:0006810 | 0.1977 |
| sl10858 | G0:0009165 | <1e-4 | slr1183 | G0:0042451 | <1e-4 | slr0888 | G0:0009987 | <1e-4 | ssr3467 | G0:0022803 | <1e-4 | slr1895 | G0:0006810 | 0.1977 |
| slr0619 | G0:0022411 | <1e-4 | slr1616 | G0:0048519 | <1e-4 | slr1544 | G0:0009892 | <1e-4 | sl11562 | G0:0008171 | <1e-4 | sl11251 | G0:0006810 | 0.1977 |
| sl15067 | G0:0006811 | <1e-4 | slr1339 | G0:0051246 | <1e-4 | slr1263 | G0:0043648 | <1e-4 | ssl5095 | G0:0022857 | <1e-4 | sl11054 | G0:0006810 | 0.1977 |
| slr6103 | G0:0006066 | <1e-4 | sl10871 | G0:0009123 | <1e-4 | sl10266 | G0:0009059 | <1e-4 | sl18040 | G0:0016817 | <1e-4 | sl10225 | G0:0006810 | 0.1977 |
| sl10350 | G0:0051347 | <1e-4 | slr2084 | G0:0071841 | <1e-4 | sl11002 | G0:0072521 | <1e-4 | sl11775 | G0:0016462 | <1e-4 | slr0801 | G0:0006810 | 0.1977 |
| sl11089 | G0:0051347 | <1e-4 | sl18012 | G0:0009987 | <1e-4 | slr0981 | G0:0051179 | <1e-4 | slr0552 | G0:0060089 | <1e-4 | sl10980 | G0:0006810 | 0.1977 |
| slr1195 | G0:0043648 | <1e-4 | ssr3122 | G0:0043648 | <1e-4 | sl11717 | G0:0009262 | <1e-4 | slr1413 | G0:0022891 | <1e-4 | sl11399 | G0:0006810 | 0.1977 |
| sl10072 | G0:0009117 | <1e-4 | sl10176 | G0:0042455 | <1e-4 | sl11254 | G0:0055086 | <1e-4 | sl10360 | G0:0022891 | <1e-4 | slr0249 | G0:0006810 | 0.1977 |
| slr0053 | G0:0043412 | <1e-4 | ssr2333 | G0:0006721 | <1e-4 | slr0598 | G0:0050794 | <1e-4 | slr1222 | G0:0022832 | <1e-4 | slr0318 | G0:0006810 | 0.1977 |
| sl11835 | G0:0051246 | <1e-4 | sl10775 | G0:0072522 | <1e-4 | ssl0739 | G0:0045184 | <1e-4 | slr2012 | G0:0022803 | <1e-4 | sl11344 | G0:0006810 | 0.1977 |
| slr0376 | G0:0045184 | <1e-4 | slr1907 | G0:0044248 | <1e-4 | slr0423 | G0:0006811 | <1e-4 | slr1895 | G0:0022803 | <1e-4 | ssl8008 | G0:0006810 | 0.1977 |
| slr0207 | G0:0044283 | <1e-4 | sl11373 | G0:0052188 | <1e-4 | slr1659 | G0:0034660 | <1e-4 | slr1128 | G0:0015291 | <1e-4 | sl11390 | G0:0006810 | 0.1977 |
| slr0971 | G0:0048518 | <1e-4 | sl10284 | G0:0009889 | <1e-4 | slr5017 | G0:0071840 | <1e-4 | ssr2755 | G0:0022836 | <1e-4 | sl10827 | G0:0006810 | 0.1977 |
| slr0172 | G0:0046164 | <1e-4 | sl11130 | G0:0034660 | <1e-4 | sl11321 | G0:0008610 | <1e-4 | ssr0692 | G0:0016818 | <1e-4 | sl10911 | G0:0006810 | 0.1977 |
| ssl0467 | G0:0031640 | <1e-4 | slr0112 | G0:0055086 | <1e-4 | slr0723 | G0:0009124 | <1e-4 | slr7073 | G0:0008171 | <1e-4 | sl10410 | G0:0006810 | 0.1977 |
| sl11222 | G0:0072524 | <1e-4 | slr6100 | G0:0033013 | <1e-4 | sl11660 | G0:0046128 | <1e-4 | slr1814 | G0:0015293 | <1e-4 | sl10737 | G0:0006810 | 0.1977 |

|          |            |       |          |            |       |         |            |       |         |            |       |         |            |        |
|----------|------------|-------|----------|------------|-------|---------|------------|-------|---------|------------|-------|---------|------------|--------|
| sl10397  | G0:0009126 | <1e-4 | slr1752  | G0:0022411 | <1e-4 | ssl1498 | G0:0051171 | <1e-4 | sl11586 | G0:0043492 | <1e-4 | slr1690 | G0:0006810 | 0.1977 |
| ssl2971  | G0:0009165 | <1e-4 | sl10539  | G0:0051347 | <1e-4 | ssl2971 | G0:0044275 | <1e-4 | sl10296 | G0:0015399 | <1e-4 | sl10752 | G0:0006810 | 0.1977 |
| sl11862  | G0:0043436 | <1e-4 | slr0680  | G0:0043436 | <1e-4 | slr0645 | G0:0009987 | <1e-4 | slr0731 | G0:0015267 | <1e-4 | slr1082 | G0:0006810 | 0.1977 |
| sl11956  | G0:0046128 | <1e-4 | sl10670  | G0:0044281 | <1e-4 | sl10810 | G0:0009987 | <1e-4 | sl10335 | G0:0016746 | <1e-4 | slr0358 | G0:0006810 | 0.1977 |
| sl11915  | G0:0009259 | <1e-4 | sl15032  | G0:0050789 | <1e-4 | sl17087 | G0:0071840 | <1e-4 | slr1851 | G0:0060089 | <1e-4 | slr0815 | G0:0006810 | 0.1977 |
| slr1429  | G0:0080090 | <1e-4 | slr0957  | G0:0051188 | <1e-4 | slr6049 | G0:0048518 | <1e-4 | slr1173 | G0:0003674 | <1e-4 | sl10981 | G0:0006810 | 0.1977 |
| ssl18028 | G0:0044281 | <1e-4 | sl10702  | G0:0051188 | <1e-4 | slr0376 | G0:0019362 | <1e-4 | slr1917 | G0:0015399 | <1e-4 | sl10810 | G0:0016491 | 0.1977 |
| sl11659  | G0:0009893 | <1e-4 | slr0780  | G0:0034660 | <1e-4 | slr0606 | G0:0044275 | <1e-4 | slr0521 | G0:0043167 | <1e-4 | sl10449 | G0:0016491 | 0.1977 |
| ssr5106  | G0:0080090 | <1e-4 | slr1493  | G0:0009262 | <1e-4 | slr1384 | G0:0044106 | <1e-4 | sl11830 | G0:0008171 | <1e-4 | sl10614 | G0:0016491 | 0.1977 |
| ssr1552  | G0:0033013 | <1e-4 | slr2120  | G0:0045184 | <1e-4 | slr2010 | G0:0006720 | <1e-4 | sl11995 | G0:0015291 | <1e-4 | slr0729 | G0:0016491 | 0.1977 |
| sl11698  | G0:0072527 | <1e-4 | slr7037  | G0:0034660 | <1e-4 | ssr1041 | G0:0043170 | <1e-4 | slr2027 | G0:0022857 | <1e-4 | slr0554 | G0:0016491 | 0.1977 |
| slr1616  | G0:0046483 | <1e-4 | slr1593  | G0:0048519 | <1e-4 | slr0751 | G0:0009260 | <1e-4 | slr6039 | G0:0015293 | <1e-4 | sl11730 | G0:0016491 | 0.1977 |
| slr0516  | G0:0048523 | <1e-4 | slr0695  | G0:0051171 | <1e-4 | ssr8013 | G0:0009123 | <1e-4 | sl10238 | G0:0022803 | <1e-4 | sl11240 | G0:0016491 | 0.1977 |
| sl10265  | G0:0071842 | <1e-4 | slr7026  | G0:0009262 | <1e-4 | sl11390 | G0:0042455 | <1e-4 | slr1464 | G0:0022857 | <1e-4 | sl10319 | G0:0016491 | 0.1977 |
| sl11191  | G0:0006811 | <1e-4 | sl11225  | G0:0019751 | <1e-4 | sl11071 | G0:0016052 | <1e-4 | ssr1375 | G0:0016462 | <1e-4 | slr1590 | G0:0016491 | 0.1977 |
| ssr1375  | G0:0009165 | <1e-4 | ssl18003 | G0:0016054 | <1e-4 | ssl2471 | G0:0051716 | <1e-4 | slr5012 | G0:0043492 | <1e-4 | slr0957 | G0:0016491 | 0.1977 |
| sl11086  | G0:0009124 | <1e-4 | sl10445  | G0:0005976 | <1e-4 | ssr1766 | G0:0006733 | <1e-4 | slr1896 | G0:0016746 | <1e-4 | sl11411 | G0:0016491 | 0.1977 |
| slr0845  | G0:0009161 | <1e-4 | sl11858  | G0:0009892 | <1e-4 | slr1814 | G0:0010556 | <1e-4 | slr1052 | G0:0022832 | <1e-4 | sl11654 | G0:0016491 | 0.1977 |
| sl17047  | G0:0051347 | <1e-4 | ssr6020  | G0:0009057 | <1e-4 | ssr1552 | G0:0071554 | <1e-4 | slr1260 | G0:0016817 | <1e-4 | slr0605 | G0:0016491 | 0.1977 |
| slr1083  | G0:0019752 | <1e-4 | ssl0467  | G0:0044260 | <1e-4 | sl10625 | G0:0050896 | <1e-4 | sl11691 | G0:0022803 | <1e-4 | sl10297 | G0:0016491 | 0.1977 |
| slr0695  | G0:0009132 | <1e-4 | slr1338  | G0:0034654 | <1e-4 | sl15047 | G0:0042451 | <1e-4 | ssl0350 | G0:0016746 | <1e-4 | slr1122 | G0:0016491 | 0.1977 |
| sl10281  | G0:0006066 | <1e-4 | slr1864  | G0:0044260 | <1e-4 | sl11858 | G0:0008150 | <1e-4 | ssl7051 | G0:0043492 | <1e-4 | sl10980 | G0:0016491 | 0.1977 |
| sl11068  | G0:0055086 | <1e-4 | ssr2781  | G0:0043933 | <1e-4 | ssl3382 | G0:0052188 | <1e-4 | ssr3402 | G0:0022892 | <1e-4 | slr1895 | G0:0016491 | 0.1977 |
| ssr2060  | G0:0048518 | <1e-4 | sl17090  | G0:0043412 | <1e-4 | sl11352 | G0:0019222 | <1e-4 | sl11372 | G0:0016746 | <1e-4 | slr1033 | G0:0016491 | 0.1977 |
| sl10732  | G0:0006721 | <1e-4 | slr0362  | G0:0019637 | <1e-4 | slr1397 | G0:0044275 | <1e-4 | slr2118 | G0:0015405 | <1e-4 | slr0789 | G0:0016491 | 0.1977 |
| slr0049  | G0:0016053 | <1e-4 | sl11135  | G0:0051818 | <1e-4 | sl10284 | G0:0006721 | <1e-4 | slr1505 | G0:0016741 | <1e-4 | sl11956 | G0:0016491 | 0.1977 |
| ssl10312 | G0:0009056 | <1e-4 | ssr1552  | G0:0009892 | <1e-4 | ssr6089 | G0:0009150 | <1e-4 | ssl5096 | G0:0043167 | <1e-4 | slr1415 | G0:0016491 | 0.1977 |
| ssr3467  | G0:0006066 | <1e-4 | slr1315  | G0:0009144 | <1e-4 | sl11344 | G0:0005996 | <1e-4 | slr1396 | G0:0043492 | <1e-4 | sl10588 | G0:0016491 | 0.1977 |
| slr2110  | G0:0080090 | <1e-4 | sl11021  | G0:0009987 | <1e-4 | ssr2201 | G0:0010468 | <1e-4 | sl10810 | G0:0015293 | <1e-4 | sl10410 | G0:0016491 | 0.1977 |
| ssr8047  | G0:0043648 | <1e-4 | slr1896  | G0:0042455 | <1e-4 | sl18002 | G0:0006163 | <1e-4 | ssl1417 | G0:0016817 | <1e-4 | sl11950 | G0:0016491 | 0.1977 |
| sl10406  | G0:0044275 | <1e-4 | sl11373  | G0:0006811 | <1e-4 | slr5016 | G0:0050794 | <1e-4 | sl18035 | G0:0005342 | <1e-4 | sl10995 | G0:0016491 | 0.1977 |
| slr7059  | G0:0080090 | <1e-4 | slr1726  | G0:0009262 | <1e-4 | sl10242 | G0:0009126 | <1e-4 | slr1287 | G0:0022892 | <1e-4 | slr0815 | G0:0016491 | 0.1977 |
| ssr3189  | G0:0044260 | <1e-4 | slr0579  | G0:0051234 | <1e-4 | slr1737 | G0:0046907 | <1e-4 | slr1342 | G0:0015075 | <1e-4 | slr7024 | G0:0016491 | 0.1977 |
| slr0852  | G0:0019219 | <1e-4 | slr1097  | G0:0044282 | <1e-4 | slr0930 | G0:0006721 | <1e-4 | slr0978 | G0:0043492 | <1e-4 | ssl0739 | G0:0016491 | 0.1977 |
| slr1647  | G0:0072527 | <1e-4 | sl10062  | G0:0051347 | <1e-4 | slr1774 | G0:0009260 | <1e-4 | ssl7022 | G0:0016818 | <1e-4 | slr1762 | G0:0016491 | 0.1977 |
| slr1590  | G0:0009987 | <1e-4 | slr7014  | G0:0071554 | <1e-4 | ssr0335 | G0:0065007 | <1e-4 | ssl5114 | G0:0060089 | <1e-4 | slr0924 | G0:0016491 | 0.1977 |
| slr1394  | G0:0044281 | <1e-4 | sl10563  | G0:0009144 | <1e-4 | slr6075 | G0:0031323 | <1e-4 | ssl2384 | G0:0042623 | <1e-4 | slr1259 | G0:0016491 | 0.1977 |
| slr0919  | G0:0006163 | <1e-4 | slr0740  | G0:0009056 | <1e-4 | sl11461 | G0:0006753 | <1e-4 | slr1505 | G0:0022857 | <1e-4 | sl10827 | G0:0016491 | 0.1977 |
| sl11162  | G0:0006220 | <1e-4 | slr1811  | G0:0009987 | <1e-4 | sl11089 | G0:0046128 | <1e-4 | slr1726 | G0:0008171 | <1e-4 | sl10539 | G0:0016491 | 0.1977 |
| sl10449  | G0:0006066 | <1e-4 | sl10436  | G0:0006732 | <1e-4 | ssr7084 | G0:0072527 | <1e-4 | slr7083 | G0:0016462 | <1e-4 | sl17065 | G0:0016491 | 0.1977 |
| sl10400  | G0:0044248 | <1e-4 | slr0104  | G0:0043170 | <1e-4 | slr1301 | G0:0009123 | <1e-4 | sl11583 | G0:0043167 | <1e-4 | ssl8008 | G0:0016491 | 0.1977 |
| slr1753  | G0:0043549 | <1e-4 | slr1998  | G0:0051171 | <1e-4 | sl10615 | G0:0006811 | <1e-4 | slr1396 | G0:0022832 | <1e-4 | slr0111 | G0:0016491 | 0.1977 |
| ssl18003 | G0:0022607 | <1e-4 | slr1235  | G0:0044248 | <1e-4 | slr0667 | G0:0016053 | <1e-4 | ssr1391 | G0:0015293 | <1e-4 | slr1209 | G0:0016491 | 0.1977 |
| slr1530  | G0:0006163 | <1e-4 | ssr1407  | G0:0044260 | <1e-4 | slr1611 | G0:0009263 | <1e-4 | sl11485 | G0:0016746 | <1e-4 | sl10156 | G0:0016491 | 0.1977 |
| slr1644  | G0:0050896 | <1e-4 | sl11608  | G0:0009262 | <1e-4 | sl10350 | G0:0034654 | <1e-4 | slr1315 | G0:0022891 | <1e-4 | slr1128 | G0:0016491 | 0.1977 |
| slr1353  | G0:0019637 | <1e-4 | ssl2807  | G0:0009309 | <1e-4 | slr2060 | G0:0048519 | <1e-4 | sl11289 | G0:0016817 | <1e-4 | slr0104 | G0:0016491 | 0.1977 |
| ssr3410  | G0:0050801 | <1e-4 | sl10702  | G0:0006721 | <1e-4 | sl11252 | G0:0044275 | <1e-4 | slr0355 | G0:0060089 | <1e-4 | sl11304 | G0:0016491 | 0.1977 |
| slr0148  | G0:0072524 | <1e-4 | slr1419  | G0:0052111 | <1e-4 | slr1614 | G0:0009889 | <1e-4 | sl15006 | G0:0022836 | <1e-4 | slr1062 | G0:0016491 | 0.1977 |
| slr1413  | G0:0034641 | <1e-4 | slr0325  | G0:0006733 | <1e-4 | slr0545 | G0:0043648 | <1e-4 | sl11004 | G0:0015075 | <1e-4 | sl10225 | G0:0016491 | 0.1977 |
| slr6081  | G0:0006811 | <1e-4 | slr1900  | G0:0034654 | <1e-4 | sl10281 | G0:0046164 | <1e-4 | slr6009 | G0:0022836 | <1e-4 | slr0172 | G0:0016491 | 0.1977 |
| slr0912  | G0:0048878 | <1e-4 | ssr2848  | G0:0009262 | <1e-4 | sl10609 | G0:0006766 | <1e-4 | slr0514 | G0:0022803 | <1e-4 | sl11040 | G0:0016491 | 0.1977 |
| ssr1375  | G0:0051716 | <1e-4 | ssl3382  | G0:0009199 | <1e-4 | sl11692 | G0:0071842 | <1e-4 | sl11142 | G0:0042623 | <1e-4 | slr1544 | G0:0016491 | 0.1977 |
| sl10552  | G0:0019222 | <1e-4 | slr0092  | G0:0009991 | <1e-4 | sl11060 | G0:0009394 | <1e-4 | slr1541 | G0:0022890 | <1e-4 | slr1862 | G0:0016491 | 0.1977 |
| sl11252  | G0:0006631 | <1e-4 | slr1875  | G0:0033013 | <1e-4 | ssr2803 | G0:0043648 | <1e-4 | ssr2754 | G0:0022890 | <1e-4 | slr0725 | G0:0016020 | 0.1948 |

|         |            |       |         |            |       |         |            |       |         |            |       |         |            |        |
|---------|------------|-------|---------|------------|-------|---------|------------|-------|---------|------------|-------|---------|------------|--------|
| sl10101 | G0:0009165 | <1e-4 | ssl3692 | G0:0031640 | <1e-4 | sl10069 | G0:0008610 | <1e-4 | slr1658 | G0:0022836 | <1e-4 | sl10253 | G0:0016020 | 0.1948 |
| sl10198 | G0:0044283 | <1e-4 | slr0887 | G0:0051234 | <1e-4 | sl10405 | G0:0009199 | <1e-4 | sl10858 | G0:0015293 | <1e-4 | slr7094 | G0:0016020 | 0.1948 |
| sl18007 | G0:0045184 | <1e-4 | sl10446 | G0:0005996 | <1e-4 | slr7080 | G0:0055086 | <1e-4 | sl15044 | G0:0022838 | <1e-4 | sl11581 | G0:0016020 | 0.1948 |
| ssr1155 | G0:0006732 | <1e-4 | slr0196 | G0:0009308 | <1e-4 | sl10176 | G0:0009987 | <1e-4 | sl10658 | G0:0016818 | <1e-4 | slr1438 | G0:0016020 | 0.1948 |
| slr0456 | G0:0046128 | <1e-4 | sl11764 | G0:0046128 | <1e-4 | sl10553 | G0:0031640 | <1e-4 | slr0587 | G0:0015293 | <1e-4 | slr1819 | G0:0016020 | 0.1948 |
| slr0871 | G0:0016052 | <1e-4 | slr1263 | G0:0034641 | <1e-4 | slr1315 | G0:0019751 | <1e-4 | ssl5103 | G0:0060089 | <1e-4 | ssr2975 | G0:0016020 | 0.1948 |
| sl10355 | G0:0051716 | <1e-4 | sl10047 | G0:0006753 | <1e-4 | slr0184 | G0:0019637 | <1e-4 | sl10405 | G0:0022836 | <1e-4 | ssr2998 | G0:0016020 | 0.1948 |
| slr6067 | G0:0044255 | <1e-4 | slr7099 | G0:0009987 | <1e-4 | sl11135 | G0:0052188 | <1e-4 | slr0519 | G0:0015267 | <1e-4 | sl17029 | G0:0016020 | 0.1948 |
| sl18040 | G0:0051179 | <1e-4 | slr1624 | G0:0006753 | <1e-4 | sl15032 | G0:0050794 | <1e-4 | slr1276 | G0:0015293 | <1e-4 | slr1935 | G0:0016020 | 0.1948 |
| sl11509 | G0:0006082 | <1e-4 | sl10263 | G0:0009308 | <1e-4 | ssl7038 | G0:0043170 | <1e-4 | sl10068 | G0:0016818 | <1e-4 | ssr1558 | G0:0016020 | 0.1948 |
| sl11912 | G0:0048522 | <1e-4 | sl11022 | G0:0009987 | <1e-4 | slr1474 | G0:0006753 | <1e-4 | sl10413 | G0:0022838 | <1e-4 | slr2103 | G0:0016020 | 0.1948 |
| sl10641 | G0:0031640 | <1e-4 | sl11749 | G0:0019751 | <1e-4 | slr0291 | G0:0006631 | <1e-4 | ssl3379 | G0:0015293 | <1e-4 | slr6012 | G0:0016020 | 0.1948 |
| sl18027 | G0:0006091 | <1e-4 | slr1177 | G0:0006811 | <1e-4 | sl11396 | G0:0009263 | <1e-4 | sl11426 | G0:0022857 | <1e-4 | slr1679 | G0:0016020 | 0.1948 |
| sl11321 | G0:0009059 | <1e-4 | slr7083 | G0:0019362 | <1e-4 | ssr2060 | G0:0009056 | <1e-4 | sl11372 | G0:0008171 | <1e-4 | ssl3573 | G0:0016020 | 0.1948 |
| sl11542 | G0:0006793 | <1e-4 | ssr1499 | G0:0052188 | <1e-4 | ssr6024 | G0:0009117 | <1e-4 | sl10932 | G0:0016462 | <1e-4 | ssr8013 | G0:0016020 | 0.1948 |
| sl10328 | G0:0072522 | <1e-4 | sl11757 | G0:0009132 | <1e-4 | ssr3409 | G0:0071841 | <1e-4 | sl10732 | G0:0015399 | <1e-4 | ssl7074 | G0:0016020 | 0.1948 |
| sl15004 | G0:0044003 | <1e-4 | slr0393 | G0:0006811 | <1e-4 | sl11691 | G0:0009259 | <1e-4 | sl11632 | G0:0005342 | <1e-4 | ssl1263 | G0:0016020 | 0.1948 |
| sl10241 | G0:0042180 | <1e-4 | sl10532 | G0:0065007 | <1e-4 | slr0645 | G0:0072521 | <1e-4 | ssr7093 | G0:0022857 | <1e-4 | slr0064 | G0:0016020 | 0.1948 |
| ssr5106 | G0:0072524 | <1e-4 | sl15069 | G0:0009142 | <1e-4 | slr1307 | G0:0006091 | <1e-4 | slr0625 | G0:0015291 | <1e-4 | slr0184 | G0:0016020 | 0.1948 |
| slr1163 | G0:0009987 | <1e-4 | sl17047 | G0:0055086 | <1e-4 | slr6028 | G0:0016053 | <1e-4 | slr8014 | G0:0042623 | <1e-4 | slr6009 | G0:0016020 | 0.1948 |
| slr1117 | G0:0072528 | <1e-4 | sl11426 | G0:0051188 | <1e-4 | ssl7046 | G0:0051186 | <1e-4 | slr1998 | G0:0022838 | <1e-4 | sl11784 | G0:0016020 | 0.1948 |
| slr0699 | G0:0048519 | <1e-4 | slr0300 | G0:0051818 | <1e-4 | ssl7038 | G0:0043933 | <1e-4 | ssr2843 | G0:0042623 | <1e-4 | sl10839 | G0:0016020 | 0.1948 |
| slr0358 | G0:0042180 | <1e-4 | ssr3154 | G0:0009309 | <1e-4 | slr0810 | G0:0016054 | <1e-4 | sl10297 | G0:0008171 | <1e-4 | ssr3572 | G0:0016020 | 0.1948 |
| slr1737 | G0:0050794 | <1e-4 | ssr6062 | G0:0065007 | <1e-4 | sl10397 | G0:0008150 | <1e-4 | ssr0332 | G0:0022836 | <1e-4 | ssr6002 | G0:0016020 | 0.1948 |
| slr1535 | G0:0055114 | <1e-4 | slr1827 | G0:0019752 | <1e-4 | sl10394 | G0:0009142 | <1e-4 | slr0607 | G0:0022803 | <1e-4 | slr8022 | G0:0016020 | 0.1948 |
| slr1977 | G0:0044282 | <1e-4 | slr1644 | G0:0042455 | <1e-4 | ssr2755 | G0:0060255 | <1e-4 | sl11656 | G0:0016746 | <1e-4 | sl15063 | G0:0016020 | 0.1948 |
| slr0112 | G0:0051188 | <1e-4 | sl16053 | G0:0019362 | <1e-4 | slr7025 | G0:0009262 | <1e-4 | sl10023 | G0:0022803 | <1e-4 | slr0948 | G0:0016020 | 0.1948 |
| slr1215 | G0:0048519 | <1e-4 | slr1070 | G0:0051171 | <1e-4 | ssl5114 | G0:0044271 | <1e-4 | ssr3467 | G0:0016746 | <1e-4 | slr1406 | G0:0016020 | 0.1948 |
| sl10577 | G0:0009892 | <1e-4 | ssl0483 | G0:0046128 | <1e-4 | slr2048 | G0:0006732 | <1e-4 | sl11541 | G0:0016741 | <1e-4 | slr0816 | G0:0016020 | 0.1948 |
| slr0863 | G0:0050801 | <1e-4 | slr0552 | G0:0065007 | <1e-4 | sl11954 | G0:0060255 | <1e-4 | slr0655 | G0:0022832 | <1e-4 | slr0865 | G0:0016020 | 0.1948 |
| ssl7022 | G0:0006163 | <1e-4 | ssr1041 | G0:0009308 | <1e-4 | sl10871 | G0:0051188 | <1e-4 | sl17078 | G0:0008171 | <1e-4 | ssr1473 | G0:0016020 | 0.1948 |
| slr1907 | G0:0045184 | <1e-4 | slr0345 | G0:0019637 | <1e-4 | slr1613 | G0:0043170 | <1e-4 | ssl1918 | G0:0008171 | <1e-4 | ssl3829 | G0:0016020 | 0.1948 |
| sl18027 | G0:0071842 | <1e-4 | slr1169 | G0:0044271 | <1e-4 | sl10031 | G0:0065007 | <1e-4 | slr0386 | G0:0015291 | <1e-4 | sl17089 | G0:0016020 | 0.1948 |
| slr0689 | G0:0034654 | <1e-4 | sl11737 | G0:0044248 | <1e-4 | sl10785 | G0:0031323 | <1e-4 | ssl5114 | G0:0005342 | <1e-4 | sl11340 | G0:0016020 | 0.1948 |
| slr7097 | G0:0009056 | <1e-4 | sl10843 | G0:0009161 | <1e-4 | ssr1114 | G0:0051171 | <1e-4 | sl11730 | G0:0016818 | <1e-4 | ssr8047 | G0:0016020 | 0.1948 |
| slr1056 | G0:0009893 | <1e-4 | sl11285 | G0:0009262 | <1e-4 | slr0376 | G0:0016054 | <1e-4 | sl10775 | G0:0060089 | <1e-4 | ssl8039 | G0:0016020 | 0.1948 |
| slr1170 | G0:0019219 | <1e-4 | sl10822 | G0:0048518 | <1e-4 | sl10843 | G0:0009991 | <1e-4 | slr1173 | G0:0042623 | <1e-4 | slr1752 | G0:0016020 | 0.1948 |
| sl11652 | G0:0034660 | <1e-4 | sl10183 | G0:0055114 | <1e-4 | slr1174 | G0:0046164 | <1e-4 | sl11390 | G0:0022803 | <1e-4 | sl11307 | G0:0016020 | 0.1948 |
| slr0590 | G0:0006091 | <1e-4 | slr0376 | G0:0043549 | <1e-4 | sl11166 | G0:0048519 | <1e-4 | slr1768 | G0:0015291 | <1e-4 | sl17028 | G0:0016020 | 0.1948 |
| slr1177 | G0:0009260 | <1e-4 | sl11399 | G0:0006091 | <1e-4 | slr6044 | G0:0071496 | <1e-4 | sl10982 | G0:0016741 | <1e-4 | ssr5011 | G0:0016020 | 0.1948 |
| slr0789 | G0:0016054 | <1e-4 | sl10781 | G0:0010468 | <1e-4 | slr6100 | G0:0051179 | <1e-4 | slr0725 | G0:0016746 | <1e-4 | sl10608 | G0:0016020 | 0.1948 |
| slr0468 | G0:0072522 | <1e-4 | sl10266 | G0:0055114 | <1e-4 | slr2125 | G0:0055082 | <1e-4 | slr0702 | G0:0015405 | <1e-4 | ssl7051 | G0:0016020 | 0.1948 |
| slr1203 | G0:0009123 | <1e-4 | slr1702 | G0:0072527 | <1e-4 | sl11938 | G0:0009892 | <1e-4 | slr0651 | G0:0016817 | <1e-4 | slr5101 | G0:0016020 | 0.1948 |
| sl11411 | G0:0044260 | <1e-4 | sl11086 | G0:0009117 | <1e-4 | sl11956 | G0:0009892 | <1e-4 | slr1070 | G0:0008171 | <1e-4 | ssl2384 | G0:0016020 | 0.1948 |
| slr0303 | G0:0051179 | <1e-4 | sl11495 | G0:0006733 | <1e-4 | slr7015 | G0:0055086 | <1e-4 | sl10742 | G0:0022890 | <1e-4 | slr1670 | G0:0016020 | 0.1948 |
| slr0725 | G0:0071841 | <1e-4 | sl10446 | G0:0042451 | <1e-4 | ssr6019 | G0:0031323 | <1e-4 | slr1045 | G0:0015077 | <1e-4 | slr6016 | G0:0016020 | 0.1948 |
| slr7057 | G0:0042180 | <1e-4 | ssl3291 | G0:0051171 | <1e-4 | ssr1258 | G0:0042180 | <1e-4 | slr1095 | G0:0043167 | <1e-4 | sl11388 | G0:0016020 | 0.1948 |
| slr1944 | G0:0019752 | <1e-4 | sl10863 | G0:0072521 | <1e-4 | slr5102 | G0:0034641 | <1e-4 | slr1956 | G0:0005342 | <1e-4 | sl11726 | G0:0016020 | 0.1948 |
| slr1865 | G0:0071842 | <1e-4 | sl10743 | G0:0033013 | <1e-4 | ssl3829 | G0:0051246 | <1e-4 | sl11151 | G0:0016818 | <1e-4 | sl10670 | G0:0016020 | 0.1948 |
| sl16052 | G0:0042451 | <1e-4 | sl10552 | G0:0006721 | <1e-4 | slr1624 | G0:0046164 | <1e-4 | sl10641 | G0:0022836 | <1e-4 | ssl7038 | G0:0016020 | 0.1948 |
| sl11656 | G0:0009126 | <1e-4 | ssr2848 | G0:0055086 | <1e-4 | slr0169 | G0:0009308 | <1e-4 | sl10044 | G0:0015291 | <1e-4 | sl11702 | G0:0016020 | 0.1948 |
| slr0554 | G0:0019751 | <1e-4 | slr0303 | G0:0006811 | <1e-4 | slr6103 | G0:0071840 | <1e-4 | slr1927 | G0:0022891 | <1e-4 | slr1599 | G0:0016020 | 0.1948 |
| sl11884 | G0:0009991 | <1e-4 | slr5018 | G0:0050794 | <1e-4 | slr0358 | G0:0048523 | <1e-4 | slr7080 | G0:0016818 | <1e-4 | ssr1425 | G0:0016020 | 0.1948 |
| slr0241 | G0:0043436 | <1e-4 | sl12007 | G0:0009308 | <1e-4 | ssl5113 | G0:0009309 | <1e-4 | slr1376 | G0:0022892 | <1e-4 | slr1624 | G0:0016020 | 0.1948 |

|          |            |       |          |            |       |          |            |       |          |            |       |          |            |        |
|----------|------------|-------|----------|------------|-------|----------|------------|-------|----------|------------|-------|----------|------------|--------|
| ssl2807  | G0:0043549 | <1e-4 | ssl0461  | G0:0044275 | <1e-4 | sl15028  | G0:0009199 | <1e-4 | slr1530  | G0:0043167 | <1e-4 | slr0313  | G0:0016020 | 0.1948 |
| sl10867  | G0:0034654 | <1e-4 | sl11254  | G0:0019752 | <1e-4 | sl11222  | G0:0006766 | <1e-4 | sl17066  | G0:0015399 | <1e-4 | sl10335  | G0:0016020 | 0.1948 |
| ssl2069  | G0:0009394 | <1e-4 | sl110208 | G0:0009308 | <1e-4 | sl11160  | G0:0008150 | <1e-4 | sl110192 | G0:0016741 | <1e-4 | sl110327 | G0:0016020 | 0.1948 |
| ssr5092  | G0:0006811 | <1e-4 | ssl1378  | G0:0016053 | <1e-4 | slr1668  | G0:0051171 | <1e-4 | ssl17046 | G0:0022803 | <1e-4 | slr1951  | G0:0016020 | 0.1948 |
| sl110785 | G0:0052188 | <1e-4 | slr6090  | G0:0080090 | <1e-4 | ssr1528  | G0:0071554 | <1e-4 | slr0148  | G0:0022838 | <1e-4 | sl110060 | G0:0016020 | 0.1948 |
| sl110423 | G0:0019751 | <1e-4 | sl110444 | G0:0044106 | <1e-4 | slr1262  | G0:0033013 | <1e-4 | sl11526  | G0:0015267 | <1e-4 | ssr6089  | G0:0016020 | 0.1948 |
| ssl0242  | G0:0048523 | <1e-4 | slr0168  | G0:0046164 | <1e-4 | slr0250  | G0:0009144 | <1e-4 | sl11355  | G0:0008171 | <1e-4 | slr0728  | G0:0016020 | 0.1948 |
| ssl17022 | G0:0051818 | <1e-4 | slr1659  | G0:0009124 | <1e-4 | sl110737 | G0:0034641 | <1e-4 | slr1809  | G0:0016741 | <1e-4 | ssr1155  | G0:0016020 | 0.1948 |
| ssl1690  | G0:0006811 | <1e-4 | slr0392  | G0:0072522 | <1e-4 | slr1917  | G0:0071842 | <1e-4 | sl110412 | G0:0003674 | <1e-4 | slr2070  | G0:0016020 | 0.1948 |
| sl110062 | G0:0052111 | <1e-4 | slr1362  | G0:0034660 | <1e-4 | slr0731  | G0:0048522 | <1e-4 | ssr1258  | G0:0022857 | <1e-4 | sl111476 | G0:0016020 | 0.1948 |
| slr1162  | G0:0043933 | <1e-4 | sl110478 | G0:0009889 | <1e-4 | sl110274 | G0:0071496 | <1e-4 | ssl2064  | G0:0016746 | <1e-4 | sl111926 | G0:0016020 | 0.1948 |
| slr6014  | G0:0006753 | <1e-4 | sl110630 | G0:0008150 | <1e-4 | sl110268 | G0:0043549 | <1e-4 | slr7012  | G0:0016741 | <1e-4 | slr0458  | G0:0016020 | 0.1948 |
| ssl17046 | G0:0046128 | <1e-4 | slr1880  | G0:0019751 | <1e-4 | slr1087  | G0:0016053 | <1e-4 | slr0605  | G0:0042623 | <1e-4 | sl110376 | G0:0016020 | 0.1948 |
| slr7016  | G0:0071496 | <1e-4 | slr0909  | G0:0044281 | <1e-4 | slr1932  | G0:0009123 | <1e-4 | slr0456  | G0:0015293 | <1e-4 | ssr5106  | G0:0016020 | 0.1948 |
| sl117063 | G0:0080090 | <1e-4 | slr1611  | G0:0006766 | <1e-4 | ssr6079  | G0:0043170 | <1e-4 | sl110010 | G0:0015405 | <1e-4 | slr0731  | G0:0016020 | 0.1948 |
| sl110585 | G0:0006066 | <1e-4 | slr1535  | G0:0043436 | <1e-4 | slr0238  | G0:0031326 | <1e-4 | sl110932 | G0:0016818 | <1e-4 | slr6088  | G0:0016020 | 0.1948 |
| slr0978  | G0:0006220 | <1e-4 | ssl0312  | G0:0055114 | <1e-4 | slr2038  | G0:0009987 | <1e-4 | sl110185 | G0:0043492 | <1e-4 | ssl17045 | G0:0016020 | 0.1948 |
| slr1572  | G0:0009059 | <1e-4 | slr0592  | G0:0009394 | <1e-4 | slr6006  | G0:0051186 | <1e-4 | slr1338  | G0:0016817 | <1e-4 | sl111285 | G0:0016020 | 0.1948 |
| slr0503  | G0:0009892 | <1e-4 | sl110837 | G0:0046907 | <1e-4 | slr1098  | G0:0043648 | <1e-4 | slr6006  | G0:0022857 | <1e-4 | slr1570  | G0:0016020 | 0.1948 |
| sl110443 | G0:0044003 | <1e-4 | ssr6062  | G0:0071840 | <1e-4 | sl111527 | G0:0051716 | <1e-4 | sl110185 | G0:0008171 | <1e-4 | sl111158 | G0:0016020 | 0.1948 |
| sl111424 | G0:0009991 | <1e-4 | slr6022  | G0:0044003 | <1e-4 | slr1917  | G0:0046128 | <1e-4 | slr0151  | G0:0042623 | <1e-4 | ssr7084  | G0:0016020 | 0.1948 |
| slr7011  | G0:0050794 | <1e-4 | ssr1425  | G0:0050789 | <1e-4 | sl110611 | G0:0055114 | <1e-4 | ssl2064  | G0:0015405 | <1e-4 | slr0634  | G0:0016020 | 0.1948 |
| sl110553 | G0:0050794 | <1e-4 | slr6088  | G0:0045184 | <1e-4 | sl110786 | G0:0052188 | <1e-4 | slr1780  | G0:0042623 | <1e-4 | sl110925 | G0:0016020 | 0.1948 |
| slr1970  | G0:0048522 | <1e-4 | sl110735 | G0:0001932 | <1e-4 | slr1363  | G0:0006631 | <1e-4 | sl110294 | G0:0042623 | <1e-4 | slr1627  | G0:0016020 | 0.1948 |
| sl111135 | G0:0051716 | <1e-4 | sl110585 | G0:0051246 | <1e-4 | sl111372 | G0:0009150 | <1e-4 | ssr1473  | G0:0003674 | <1e-4 | ssl13549 | G0:0016020 | 0.1948 |
| sl111761 | G0:0034641 | <1e-4 | sl111433 | G0:0019637 | <1e-4 | slr0957  | G0:0034654 | <1e-4 | sl116055 | G0:0005342 | <1e-4 | sl110044 | G0:0016020 | 0.1948 |
| slr2038  | G0:0019219 | <1e-4 | slr1681  | G0:0016054 | <1e-4 | slr1436  | G0:0009893 | <1e-4 | slr1062  | G0:0015293 | <1e-4 | ssr6019  | G0:0016020 | 0.1948 |
| sl110933 | G0:0009165 | <1e-4 | slr0625  | G0:0046483 | <1e-4 | slr0890  | G0:0080090 | <1e-4 | sl111348 | G0:0016741 | <1e-4 | sl111547 | G0:0016020 | 0.1948 |
| sl110846 | G0:0072521 | <1e-4 | sl110296 | G0:0044248 | <1e-4 | sl110577 | G0:0046128 | <1e-4 | slr1721  | G0:0022838 | <1e-4 | slr6087  | G0:0016020 | 0.1948 |
| slr0496  | G0:0048522 | <1e-4 | slr1906  | G0:0019752 | <1e-4 | sl111532 | G0:0005996 | <1e-4 | slr0921  | G0:0008171 | <1e-4 | slr0709  | G0:0016020 | 0.1948 |
| slr1563  | G0:0044281 | <1e-4 | slr1557  | G0:0009141 | <1e-4 | slr1071  | G0:0048523 | <1e-4 | slr0960  | G0:0022892 | <1e-4 | sl110157 | G0:0016020 | 0.1948 |
| slr1222  | G0:0072521 | <1e-4 | ssl0312  | G0:0042451 | <1e-4 | sl110487 | G0:0019362 | <1e-4 | slr5087  | G0:0015077 | <1e-4 | slr1241  | G0:0016020 | 0.1948 |
| slr1183  | G0:0006163 | <1e-4 | slr1603  | G0:0009262 | <1e-4 | sl111528 | G0:0022411 | <1e-4 | ssl12148 | G0:0042623 | <1e-4 | sl110062 | G0:0016020 | 0.1948 |
| slr1667  | G0:0050789 | <1e-4 | sl111541 | G0:0009056 | <1e-4 | slr0065  | G0:0051234 | <1e-4 | slr5037  | G0:0016741 | <1e-4 | sl111106 | G0:0016020 | 0.1948 |
| slr0815  | G0:0009142 | <1e-4 | slr6014  | G0:0043549 | <1e-4 | slr1959  | G0:0043412 | <1e-4 | slr1535  | G0:0015075 | <1e-4 | slr1623  | G0:0016020 | 0.1948 |
| sl111601 | G0:0009263 | <1e-4 | slr0059  | G0:0006631 | <1e-4 | ssr3409  | G0:0009165 | <1e-4 | slr0668  | G0:0022890 | <1e-4 | slr0590  | G0:0016020 | 0.1948 |
| ssr2802  | G0:0051246 | <1e-4 | slr0151  | G0:0051234 | <1e-4 | slr0784  | G0:0019219 | <1e-4 | ssr5020  | G0:0005342 | <1e-4 | slr1886  | G0:0016020 | 0.1948 |
| ssr6083  | G0:0048878 | <1e-4 | slr2103  | G0:0031323 | <1e-4 | ssr1473  | G0:0006091 | <1e-4 | slr0723  | G0:0022832 | <1e-4 | sl111254 | G0:0016020 | 0.1948 |
| slr6015  | G0:0046128 | <1e-4 | slr0709  | G0:0072522 | <1e-4 | sl111630 | G0:0044260 | <1e-4 | sl111783 | G0:0043492 | <1e-4 | slr8021  | G0:0016020 | 0.1948 |
| slr0065  | G0:0072524 | <1e-4 | slr0423  | G0:0031326 | <1e-4 | slr6063  | G0:0009892 | <1e-4 | slr2012  | G0:0016462 | <1e-4 | sl115069 | G0:0016020 | 0.1948 |
| slr1378  | G0:0043933 | <1e-4 | sl110981 | G0:0006721 | <1e-4 | slr1210  | G0:0043933 | <1e-4 | slr1240  | G0:0022890 | <1e-4 | ssr6086  | G0:0016020 | 0.1948 |
| slr0060  | G0:0042455 | <1e-4 | ssr2802  | G0:0060255 | <1e-4 | sl111006 | G0:0051188 | <1e-4 | sl110314 | G0:0015293 | <1e-4 | ssl5025  | G0:0016020 | 0.1948 |
| slr1964  | G0:0044106 | <1e-4 | sl115003 | G0:0009309 | <1e-4 | slr2111  | G0:0046394 | <1e-4 | slr5053  | G0:0016741 | <1e-4 | sl111289 | G0:0016020 | 0.1948 |
| slr1541  | G0:0009059 | <1e-4 | ssl3692  | G0:0044255 | <1e-4 | sl111681 | G0:0009394 | <1e-4 | slr5037  | G0:0022832 | <1e-4 | sl111698 | G0:0016020 | 0.1948 |
| sl118040 | G0:0008150 | <1e-4 | ssr2975  | G0:0043549 | <1e-4 | ssr3189  | G0:0018130 | <1e-4 | slr1168  | G0:0003674 | <1e-4 | ssl5091  | G0:0016020 | 0.1948 |
| slr0689  | G0:0006066 | <1e-4 | slr7094  | G0:0022411 | <1e-4 | sl111232 | G0:0044248 | <1e-4 | slr0325  | G0:0043167 | <1e-4 | slr1079  | G0:0016020 | 0.1948 |
| slr1956  | G0:0009259 | <1e-4 | sl111509 | G0:0055114 | <1e-4 | slr0650  | G0:0006733 | <1e-4 | slr6021  | G0:0042623 | <1e-4 | slr0771  | G0:0016020 | 0.1948 |
| slr0941  | G0:0044281 | <1e-4 | sl110448 | G0:0043412 | <1e-4 | slr5024  | G0:0009262 | <1e-4 | sl110765 | G0:0022892 | <1e-4 | ssr2060  | G0:0016020 | 0.1948 |
| sl111926 | G0:0006721 | <1e-4 | sl111891 | G0:0006091 | <1e-4 | sl111995 | G0:0044283 | <1e-4 | slr0479  | G0:0015075 | <1e-4 | sl117030 | G0:0016020 | 0.1948 |
| slr1576  | G0:0009309 | <1e-4 | sl110596 | G0:0044003 | <1e-4 | slr2118  | G0:0019751 | <1e-4 | ssr6032  | G0:0016741 | <1e-4 | slr5115  | G0:0016020 | 0.1948 |
| slr2027  | G0:0001932 | <1e-4 | slr1484  | G0:0050794 | <1e-4 | slr2120  | G0:0043549 | <1e-4 | ssl5108  | G0:0003674 | <1e-4 | slr1206  | G0:0016020 | 0.1948 |
| slr6104  | G0:0048523 | <1e-4 | slr0806  | G0:0072524 | <1e-4 | sl117047 | G0:0044255 | <1e-4 | sl111225 | G0:0015405 | <1e-4 | slr6071  | G0:0016020 | 0.1948 |
| slr5111  | G0:0009126 | <1e-4 | sl110760 | G0:0046164 | <1e-4 | sl111049 | G0:0042451 | <1e-4 | ssr3189  | G0:0016746 | <1e-4 | ssl17048 | G0:0016020 | 0.1948 |
| sl111925 | G0:0033013 | <1e-4 | sl111131 | G0:0001932 | <1e-4 | sl110645 | G0:0022607 | <1e-4 | sl118004 | G0:0043492 | <1e-4 | sl111583 | G0:0016020 | 0.1948 |

|         |            |       |         |            |       |         |            |       |          |            |       |         |            |        |
|---------|------------|-------|---------|------------|-------|---------|------------|-------|----------|------------|-------|---------|------------|--------|
| ssl2069 | G0:0034660 | <1e-4 | ssl2996 | G0:0052111 | <1e-4 | sl11882 | G0:0044282 | <1e-4 | sl11960  | G0:0016818 | <1e-4 | sl10230 | G0:0016020 | 0.1948 |
| sl10249 | G0:0048518 | <1e-4 | slr1704 | G0:0051716 | <1e-4 | slr5111 | G0:0034654 | <1e-4 | slr0907  | G0:0015293 | <1e-4 | sl11495 | G0:0016020 | 0.1948 |
| slr1095 | G0:0016053 | <1e-4 | slr0964 | G0:0009142 | <1e-4 | slr7102 | G0:0048518 | <1e-4 | sl11757  | G0:0015267 | <1e-4 | sl11832 | G0:0016020 | 0.1948 |
| slr0423 | G0:0006733 | <1e-4 | slr0207 | G0:0009161 | <1e-4 | ssr7084 | G0:0044282 | <1e-4 | slr2122  | G0:0022890 | <1e-4 | slr1807 | G0:0016020 | 0.1948 |
| slr0692 | G0:0060255 | <1e-4 | slr0770 | G0:0072521 | <1e-4 | sl11348 | G0:0050801 | <1e-4 | slr1623  | G0:0015405 | <1e-4 | slr7060 | G0:0016020 | 0.1948 |
| slr5126 | G0:0010468 | <1e-4 | sl10539 | G0:0050794 | <1e-4 | slr0366 | G0:0071840 | <1e-4 | slr0625  | G0:0016817 | <1e-4 | slr1537 | G0:0016020 | 0.1948 |
| sl10984 | G0:0009132 | <1e-4 | slr5024 | G0:0009199 | <1e-4 | sl11906 | G0:0009199 | <1e-4 | sl11203  | G0:0060089 | <1e-4 | sl11319 | G0:0016020 | 0.1948 |
| sl11715 | G0:0043933 | <1e-4 | sl10294 | G0:0006631 | <1e-4 | slr1083 | G0:0051171 | <1e-4 | slr0058  | G0:0015293 | <1e-4 | sl10847 | G0:0016020 | 0.1948 |
| sl11573 | G0:0022607 | <1e-4 | slr1616 | G0:0044106 | <1e-4 | slr1084 | G0:0048518 | <1e-4 | ssr6026  | G0:0005342 | <1e-4 | slr1170 | G0:0016020 | 0.1948 |
| sl17064 | G0:0046483 | <1e-4 | slr1150 | G0:0009142 | <1e-4 | sl11225 | G0:0019637 | <1e-4 | ssr6079  | G0:0015293 | <1e-4 | slr5127 | G0:0016020 | 0.1948 |
| ssl2749 | G0:0008610 | <1e-4 | slr0865 | G0:0009308 | <1e-4 | slr1288 | G0:0006631 | <1e-4 | slr0812  | G0:0022832 | <1e-4 | ss12138 | G0:0016020 | 0.1948 |
| slr1441 | G0:0016054 | <1e-4 | slr1052 | G0:0071554 | <1e-4 | slr1752 | G0:0046907 | <1e-4 | slr1083  | G0:0022836 | <1e-4 | ss12595 | G0:0016020 | 0.1948 |
| slr7094 | G0:0031323 | <1e-4 | slr7101 | G0:0019752 | <1e-4 | sl10659 | G0:0046483 | <1e-4 | sl10325  | G0:0022892 | <1e-4 | slr0610 | G0:0016020 | 0.1948 |
| slr6087 | G0:0043648 | <1e-4 | slr0554 | G0:0006721 | <1e-4 | slr6090 | G0:0009199 | <1e-4 | slr0569  | G0:0015291 | <1e-4 | sl11531 | G0:0016020 | 0.1948 |
| slr2118 | G0:0031323 | <1e-4 | slr2121 | G0:0044282 | <1e-4 | slr2025 | G0:0051188 | <1e-4 | sl10252  | G0:0043492 | <1e-4 | slr7026 | G0:0016020 | 0.1948 |
| slr1450 | G0:0009165 | <1e-4 | ssr5074 | G0:0006091 | <1e-4 | slr0317 | G0:0006811 | <1e-4 | slr1207  | G0:0016817 | <1e-4 | sl11640 | G0:0016020 | 0.1948 |
| slr0393 | G0:0009259 | <1e-4 | sl11486 | G0:0065007 | <1e-4 | ssr0692 | G0:0033013 | <1e-4 | sl10283  | G0:0005342 | <1e-4 | sl10543 | G0:0016020 | 0.1948 |
| ss18028 | G0:0006631 | <1e-4 | sl11630 | G0:0051179 | <1e-4 | ssr6027 | G0:0009144 | <1e-4 | sl10102  | G0:0016818 | <1e-4 | slr6068 | G0:0016020 | 0.1948 |
| sl11934 | G0:0052188 | <1e-4 | sl11654 | G0:0016052 | <1e-4 | slr0514 | G0:0018130 | <1e-4 | sl11570  | G0:0016818 | <1e-4 | slr0656 | G0:0016020 | 0.1948 |
| slr1690 | G0:0009150 | <1e-4 | sgl0002 | G0:0006163 | <1e-4 | sl10428 | G0:0051186 | <1e-4 | slr1780  | G0:0008171 | <1e-4 | slr2027 | G0:0016020 | 0.1948 |
| sl10584 | G0:0072528 | <1e-4 | slr1235 | G0:0046128 | <1e-4 | slr0651 | G0:0044275 | <1e-4 | slr6064  | G0:0022890 | <1e-4 | sl10749 | G0:0016020 | 0.1948 |
| ssr2615 | G0:0043412 | <1e-4 | sl15046 | G0:0071841 | <1e-4 | sl10410 | G0:0055114 | <1e-4 | slr5102  | G0:0022857 | <1e-4 | sl11714 | G0:0016020 | 0.1948 |
| sl11773 | G0:0006766 | <1e-4 | sl10822 | G0:0008150 | <1e-4 | sl11225 | G0:0044281 | <1e-4 | slr0923  | G0:0022857 | <1e-4 | slr1174 | G0:0016020 | 0.1948 |
| slr1613 | G0:0046907 | <1e-4 | sl10563 | G0:0009150 | <1e-4 | sl10661 | G0:0055086 | <1e-4 | slr0145  | G0:0015405 | <1e-4 | sl17090 | G0:0016020 | 0.1948 |
| slr0625 | G0:0080090 | <1e-4 | ssr1258 | G0:0071496 | <1e-4 | slr1788 | G0:0042180 | <1e-4 | slr0723  | G0:0022836 | <1e-4 | slr5053 | G0:0016020 | 0.1948 |
| slr1262 | G0:0080090 | <1e-4 | sl11692 | G0:0044106 | <1e-4 | slr1209 | G0:0044003 | <1e-4 | sl10676  | G0:0016818 | <1e-4 | ss15113 | G0:0016020 | 0.1948 |
| sl10181 | G0:0051716 | <1e-4 | slr1932 | G0:0009309 | <1e-4 | ssr2317 | G0:0009150 | <1e-4 | sl10242  | G0:0022803 | <1e-4 | ss13615 | G0:0016020 | 0.1948 |
| slr7026 | G0:0009263 | <1e-4 | sl10172 | G0:0006732 | <1e-4 | slr0871 | G0:0009991 | <1e-4 | slr1384  | G0:0022803 | <1e-4 | sl11095 | G0:0016020 | 0.1948 |
| slr6071 | G0:0006220 | <1e-4 | sl10498 | G0:0005996 | <1e-4 | slr1391 | G0:0048519 | <1e-4 | ssr5092  | G0:0022857 | <1e-4 | sl11151 | G0:0016020 | 0.1948 |
| ss12148 | G0:0016052 | <1e-4 | ss12733 | G0:0044260 | <1e-4 | slr2032 | G0:0050801 | <1e-4 | slr1437  | G0:0015405 | <1e-4 | sl10172 | G0:0016020 | 0.1948 |
| sl10608 | G0:0072524 | <1e-4 | slr0517 | G0:0009263 | <1e-4 | slr1614 | G0:0046394 | <1e-4 | slr1789  | G0:0015405 | <1e-4 | ssr7017 | G0:0016020 | 0.1948 |
| sl11455 | G0:0034641 | <1e-4 | sl10272 | G0:0046164 | <1e-4 | slr1179 | G0:0009123 | <1e-4 | slr2025  | G0:0015405 | <1e-4 | ssr0759 | G0:0016020 | 0.1948 |
| slr0670 | G0:0051234 | <1e-4 | sl11925 | G0:0044248 | <1e-4 | ss13615 | G0:0050896 | <1e-4 | sl115130 | G0:0043492 | <1e-4 | slr1507 | G0:0016020 | 0.1948 |
| slr6071 | G0:0009126 | <1e-4 | slr1384 | G0:0009123 | <1e-4 | sl11654 | G0:0072524 | <1e-4 | slr1657  | G0:0042623 | <1e-4 | ss11378 | G0:0016020 | 0.1948 |
| sl10269 | G0:0018130 | <1e-4 | slr0263 | G0:0006733 | <1e-4 | ssr2843 | G0:0065007 | <1e-4 | slr0440  | G0:0005342 | <1e-4 | slr0588 | G0:0016020 | 0.1948 |
| sl10192 | G0:0006766 | <1e-4 | sl11640 | G0:0051234 | <1e-4 | ss10353 | G0:0042180 | <1e-4 | sl10857  | G0:0005342 | <1e-4 | ss17021 | G0:0016020 | 0.1948 |
| sl17069 | G0:0001932 | <1e-4 | sl11608 | G0:0009889 | <1e-4 | sl11526 | G0:0055082 | <1e-4 | slr6015  | G0:0022836 | <1e-4 | sl11415 | G0:0016020 | 0.1948 |
| sl12007 | G0:0046164 | <1e-4 | slr1342 | G0:0051818 | <1e-4 | sl10552 | G0:0043436 | <1e-4 | slr7082  | G0:0043167 | <1e-4 | slr1704 | G0:0016020 | 0.1948 |
| sl10369 | G0:0009893 | <1e-4 | slr0863 | G0:0090304 | <1e-4 | slr2118 | G0:0043170 | <1e-4 | sl10793  | G0:0042623 | <1e-4 | slr1911 | G0:0016020 | 0.1948 |
| sl10188 | G0:0006220 | <1e-4 | slr7101 | G0:0048523 | <1e-4 | sl10905 | G0:0034641 | <1e-4 | slr1895  | G0:0015267 | <1e-4 | sl11164 | G0:0016020 | 0.1948 |
| slr0376 | G0:0042451 | <1e-4 | ssr1558 | G0:0009056 | <1e-4 | slr0060 | G0:0008150 | <1e-4 | slr0455  | G0:0015075 | <1e-4 | ss17007 | G0:0016020 | 0.1948 |
| slr1807 | G0:0071496 | <1e-4 | slr0689 | G0:0034641 | <1e-4 | slr1210 | G0:0009892 | <1e-4 | slr1813  | G0:0015399 | <1e-4 | sl10552 | G0:0016020 | 0.1948 |
| slr0325 | G0:0071840 | <1e-4 | ss15098 | G0:0055114 | <1e-4 | slr6072 | G0:0016052 | <1e-4 | sl17034  | G0:0022836 | <1e-4 | sl11681 | G0:0016020 | 0.1948 |
| sl10590 | G0:0045184 | <1e-4 | sl11267 | G0:0072524 | <1e-4 | slr6007 | G0:0042451 | <1e-4 | ss12148  | G0:0016741 | <1e-4 | sl11464 | G0:0016020 | 0.1948 |
| sl11355 | G0:0009893 | <1e-4 | slr1384 | G0:0009309 | <1e-4 | slr0496 | G0:0006811 | <1e-4 | sl11714  | G0:0022836 | <1e-4 | sl10405 | G0:0016020 | 0.1948 |
| slr1907 | G0:0009161 | <1e-4 | sl16054 | G0:0009056 | <1e-4 | ssr7017 | G0:0022607 | <1e-4 | slr1896  | G0:0043167 | <1e-4 | ssr0109 | G0:0016020 | 0.1948 |
| slr0146 | G0:0048878 | <1e-4 | slr1438 | G0:0016052 | <1e-4 | slr0937 | G0:0016054 | <1e-4 | sl10442  | G0:0060089 | <1e-4 | slr6075 | G0:0016020 | 0.1948 |
| sl10743 | G0:0045184 | <1e-4 | ssr6048 | G0:0019362 | <1e-4 | slr1087 | G0:0009165 | <1e-4 | slr1647  | G0:0022803 | <1e-4 | sl15004 | G0:0016020 | 0.1948 |
| sl10102 | G0:0065007 | <1e-4 | sl11239 | G0:0043549 | <1e-4 | sl10328 | G0:0009059 | <1e-4 | slr0890  | G0:0015405 | <1e-4 | ss17022 | G0:0016020 | 0.1948 |
| slr0287 | G0:0006066 | <1e-4 | slr0416 | G0:0006066 | <1e-4 | sl11004 | G0:0044275 | <1e-4 | slr0039  | G0:0060089 | <1e-4 | slr1396 | G0:0016020 | 0.1948 |
| sl11651 | G0:0046164 | <1e-4 | sl10280 | G0:0006733 | <1e-4 | slr0579 | G0:0055114 | <1e-4 | slr6015  | G0:0016817 | <1e-4 | slr5087 | G0:0016020 | 0.1948 |
| slr1886 | G0:0050801 | <1e-4 | slr1799 | G0:0046128 | <1e-4 | ss11255 | G0:0051818 | <1e-4 | ssr5121  | G0:0015293 | <1e-4 | slr1780 | G0:0016020 | 0.1948 |
| slr2080 | G0:0006163 | <1e-4 | ssr5074 | G0:0006721 | <1e-4 | sl11173 | G0:0071554 | <1e-4 | sl11476  | G0:0016741 | <1e-4 | slr0303 | G0:0016020 | 0.1948 |
| slr1056 | G0:0071554 | <1e-4 | slr7012 | G0:0051818 | <1e-4 | sl11609 | G0:0006811 | <1e-4 | slr5126  | G0:0042623 | <1e-4 | sl11785 | G0:0016020 | 0.1948 |

|         |            |       |         |            |       |         |            |       |         |            |       |         |            |        |
|---------|------------|-------|---------|------------|-------|---------|------------|-------|---------|------------|-------|---------|------------|--------|
| slr0642 | G0:0009126 | <1e-4 | slr0407 | G0:0009308 | <1e-4 | slr1788 | G0:0071496 | <1e-4 | slr1570 | G0:0015293 | <1e-4 | slr2052 | G0:0016020 | 0.1948 |
| sl11219 | G0:0009161 | <1e-4 | slr1814 | G0:0046483 | <1e-4 | slr0489 | G0:0043549 | <1e-4 | slr1957 | G0:0015291 | <1e-4 | slr0755 | G0:0016020 | 0.1948 |
| slr7082 | G0:0072524 | <1e-4 | ssr2912 | G0:0044275 | <1e-4 | slr1563 | G0:0008610 | <1e-4 | ssr2318 | G0:0022836 | <1e-4 | sl11380 | G0:0016020 | 0.1948 |
| sl17086 | G0:0052188 | <1e-4 | sl10022 | G0:0048518 | <1e-4 | slr5017 | G0:0046907 | <1e-4 | slr0304 | G0:0022838 | <1e-4 | slr1601 | G0:0016020 | 0.1948 |
| sl10586 | G0:0019222 | <1e-4 | slr0483 | G0:0051716 | <1e-4 | ssr0102 | G0:0044271 | <1e-4 | sl11233 | G0:0015075 | <1e-4 | sl10249 | G0:0016020 | 0.1948 |
| sl11372 | G0:0044283 | <1e-4 | slr0334 | G0:0048522 | <1e-4 | ss11792 | G0:0009144 | <1e-4 | sl11061 | G0:0015077 | <1e-4 | sl10160 | G0:0016020 | 0.1948 |
| slr0870 | G0:0010468 | <1e-4 | slr1513 | G0:0072524 | <1e-4 | sl10996 | G0:0060255 | <1e-4 | slr1203 | G0:0008171 | <1e-4 | slr6033 | G0:0016020 | 0.1948 |
| slr0356 | G0:0009117 | <1e-4 | sl17077 | G0:0022411 | <1e-4 | sl10661 | G0:0044248 | <1e-4 | ssr1375 | G0:0015075 | <1e-4 | ss15108 | G0:0016020 | 0.1948 |
| ssr2802 | G0:0034641 | <1e-4 | sl10328 | G0:0055114 | <1e-4 | slr0393 | G0:0071841 | <1e-4 | sl18033 | G0:0022832 | <1e-4 | slr6045 | G0:0016020 | 0.1948 |
| sl10023 | G0:0022411 | <1e-4 | slr0581 | G0:0034641 | <1e-4 | sl11702 | G0:0055082 | <1e-4 | sl11832 | G0:0015267 | <1e-4 | slr0878 | G0:0016020 | 0.1948 |
| slr1906 | G0:006082  | <1e-4 | slr7011 | G0:0005996 | <1e-4 | slr1223 | G0:0009141 | <1e-4 | ssr2554 | G0:0022838 | <1e-4 | slr6029 | G0:0016020 | 0.1948 |
| slr0269 | G0:0042180 | <1e-4 | slr0964 | G0:0019219 | <1e-4 | slr0431 | G0:0043549 | <1e-4 | slr0598 | G0:0022836 | <1e-4 | ss16061 | G0:0016020 | 0.1948 |
| ssr6030 | G0:0008150 | <1e-4 | slr1886 | G0:0051246 | <1e-4 | ss13573 | G0:0080090 | <1e-4 | sl17006 | G0:0022890 | <1e-4 | sl11692 | G0:0016020 | 0.1948 |
| slr1484 | G0:0006732 | <1e-4 | slr1034 | G0:0055114 | <1e-4 | slr0294 | G0:0051716 | <1e-4 | sl11783 | G0:0042623 | <1e-4 | sl15128 | G0:0016020 | 0.1948 |
| ssr7017 | G0:0006066 | <1e-4 | slr6073 | G0:0034641 | <1e-4 | slr0650 | G0:0046483 | <1e-4 | slr0106 | G0:0016818 | <1e-4 | ss12971 | G0:0016020 | 0.1948 |
| slr1658 | G0:0051171 | <1e-4 | slr0416 | G0:0018130 | <1e-4 | slr0989 | G0:0042455 | <1e-4 | sl11162 | G0:0022892 | <1e-4 | sl18019 | G0:0016020 | 0.1948 |
| slr0869 | G0:0044275 | <1e-4 | ss11552 | G0:0051179 | <1e-4 | slr0575 | G0:0080090 | <1e-4 | slr1920 | G0:0015405 | <1e-4 | ssr3570 | G0:0016020 | 0.1948 |
| slr0082 | G0:0043412 | <1e-4 | slr1636 | G0:0006753 | <1e-4 | sl10498 | G0:0006082 | <1e-4 | sl10252 | G0:0043167 | <1e-4 | slr1875 | G0:0016020 | 0.1948 |
| sl11251 | G0:0043933 | <1e-4 | sl10008 | G0:0008150 | <1e-4 | ssr1766 | G0:0044281 | <1e-4 | ss13692 | G0:0003674 | <1e-4 | slr0273 | G0:0016020 | 0.1948 |
| sl10676 | G0:0034654 | <1e-4 | sl10609 | G0:0009889 | <1e-4 | sl10102 | G0:0051171 | <1e-4 | sl10615 | G0:0015405 | <1e-4 | sl11532 | G0:0016020 | 0.1948 |
| slr6049 | G0:0019751 | <1e-4 | slr1235 | G0:0005996 | <1e-4 | slr6031 | G0:0022411 | <1e-4 | slr5101 | G0:0022892 | <1e-4 | slr0517 | G0:0016020 | 0.1948 |
| slr0937 | G0:0006631 | <1e-4 | sl11002 | G0:0006766 | <1e-4 | sl15069 | G0:0046128 | <1e-4 | sl11247 | G0:0015075 | <1e-4 | sl10525 | G0:0016020 | 0.1948 |
| slr1780 | G0:0009059 | <1e-4 | sl11273 | G0:0071554 | <1e-4 | slr1376 | G0:0051818 | <1e-4 | slr0709 | G0:0022890 | <1e-4 | sl17087 | G0:0016020 | 0.1948 |
| sl11054 | G0:0009892 | <1e-4 | slr0468 | G0:0044003 | <1e-4 | sl10609 | G0:0008610 | <1e-4 | sl10630 | G0:0016462 | <1e-4 | slr5012 | G0:0016020 | 0.1948 |
| slr1726 | G0:0031640 | <1e-4 | slr1704 | G0:0044283 | <1e-4 | ss15100 | G0:0009123 | <1e-4 | sl10419 | G0:0022832 | <1e-4 | sl11891 | G0:0016020 | 0.1948 |
| sl11414 | G0:0055086 | <1e-4 | sl11979 | G0:0019219 | <1e-4 | sl11939 | G0:0006811 | <1e-4 | slr0468 | G0:0022803 | <1e-4 | slr0416 | G0:0016020 | 0.1948 |
| ss17048 | G0:0042455 | <1e-4 | slr0579 | G0:0071841 | <1e-4 | slr0207 | G0:0009262 | <1e-4 | slr1288 | G0:0042623 | <1e-4 | slr6022 | G0:0016020 | 0.1948 |
| sl10031 | G0:0022411 | <1e-4 | slr0642 | G0:0071842 | <1e-4 | slr0637 | G0:0034641 | <1e-4 | ssr1698 | G0:0022857 | <1e-4 | slr7073 | G0:0016020 | 0.1948 |
| sl15130 | G0:0009124 | <1e-4 | slr1223 | G0:0051716 | <1e-4 | slr0731 | G0:0043933 | <1e-4 | ssr2317 | G0:0015291 | <1e-4 | sl18012 | G0:0016020 | 0.1948 |
| slr0148 | G0:0055114 | <1e-4 | sl10102 | G0:0071840 | <1e-4 | slr1778 | G0:0009117 | <1e-4 | sl10645 | G0:0015291 | <1e-4 | slr0325 | G0:0016020 | 0.1948 |
| slr0059 | G0:0050801 | <1e-4 | sl11542 | G0:0043412 | <1e-4 | slr1570 | G0:0044271 | <1e-4 | ss12814 | G0:0008171 | <1e-4 | sl10858 | G0:0016020 | 0.1948 |
| slr1290 | G0:0051188 | <1e-4 | slr0959 | G0:0048522 | <1e-4 | sl10446 | G0:0009124 | <1e-4 | slr1353 | G0:0015399 | <1e-4 | slr1681 | G0:0016020 | 0.1948 |
| slr1614 | G0:0006163 | <1e-4 | ssr3122 | G0:0006576 | <1e-4 | ssr2318 | G0:0043170 | <1e-4 | slr1194 | G0:0060089 | <1e-4 | slr7100 | G0:0016020 | 0.1948 |
| sl10602 | G0:0071840 | <1e-4 | slr1142 | G0:0019219 | <1e-4 | slr2144 | G0:0009987 | <1e-4 | ss10750 | G0:0022838 | <1e-4 | slr1114 | G0:0016020 | 0.1948 |
| slr1495 | G0:0031323 | <1e-4 | slr6091 | G0:0031640 | <1e-4 | slr1813 | G0:0006733 | <1e-4 | slr0610 | G0:0022838 | <1e-4 | slr1236 | G0:0016020 | 0.1948 |
| sl10174 | G0:0006576 | <1e-4 | slr0023 | G0:0051246 | <1e-4 | sl10925 | G0:0046483 | <1e-4 | slr1122 | G0:0043167 | <1e-4 | ssr6083 | G0:0016020 | 0.1948 |
| slr1034 | G0:0022411 | <1e-4 | ss13291 | G0:0043648 | <1e-4 | slr7016 | G0:0009124 | <1e-4 | slr8044 | G0:0015267 | <1e-4 | slr1142 | G0:0016020 | 0.1948 |
| slr1970 | G0:0048518 | <1e-4 | slr1940 | G0:0072521 | <1e-4 | slr0273 | G0:0005996 | <1e-4 | slr7098 | G0:0003674 | <1e-4 | slr2042 | G0:0016020 | 0.1948 |
| sl11773 | G0:0019752 | <1e-4 | ss12138 | G0:0044260 | <1e-4 | ss12162 | G0:0044106 | <1e-4 | sl10381 | G0:0022891 | <1e-4 | sl18040 | G0:0016020 | 0.1948 |
| sl11289 | G0:0019222 | <1e-4 | sl17064 | G0:0051716 | <1e-4 | slr0668 | G0:0048523 | <1e-4 | slr5116 | G0:0060089 | <1e-4 | sl10736 | G0:0016020 | 0.1948 |
| slr0656 | G0:0044248 | <1e-4 | slr1053 | G0:0055114 | <1e-4 | sl11751 | G0:0051234 | <1e-4 | slr0263 | G0:0043492 | <1e-4 | slr2117 | G0:0016020 | 0.1948 |
| sl11433 | G0:0031640 | <1e-4 | slr7073 | G0:0044248 | <1e-4 | sl11950 | G0:0009126 | <1e-4 | slr1593 | G0:0016818 | <1e-4 | slr0587 | G0:0016020 | 0.1948 |
| sl17064 | G0:0048519 | <1e-4 | sl10853 | G0:0044275 | <1e-4 | ssr1499 | G0:0006793 | <1e-4 | slr0273 | G0:0015267 | <1e-4 | slr0643 | G0:0016020 | 0.1948 |
| sl11834 | G0:0006091 | <1e-4 | slr0708 | G0:0009987 | <1e-4 | sl10875 | G0:0009987 | <1e-4 | slr0168 | G0:0016817 | <1e-4 | slr6106 | G0:0016020 | 0.1948 |
| slr0065 | G0:0046164 | <1e-4 | ssr6027 | G0:0048522 | <1e-4 | slr1034 | G0:0006793 | <1e-4 | slr0023 | G0:0003674 | <1e-4 | slr0667 | G0:0016020 | 0.1948 |
| slr1957 | G0:0006163 | <1e-4 | sl10785 | G0:0022411 | <1e-4 | sl10577 | G0:0051171 | <1e-4 | slr0053 | G0:0008171 | <1e-4 | slr0082 | G0:0016020 | 0.1948 |
| slr1895 | G0:0009263 | <1e-4 | sl11060 | G0:0022607 | <1e-4 | ss17042 | G0:0043412 | <1e-4 | ssr6079 | G0:0016741 | <1e-4 | slr6103 | G0:0016020 | 0.1948 |
| sl10482 | G0:0042180 | <1e-4 | slr0374 | G0:0044271 | <1e-4 | slr1920 | G0:0009199 | <1e-4 | sl10481 | G0:0015075 | <1e-4 | sl17034 | G0:0016020 | 0.1948 |
| slr0179 | G0:0046128 | <1e-4 | sl10007 | G0:0006163 | <1e-4 | slr1535 | G0:0050801 | <1e-4 | slr1557 | G0:0060089 | <1e-4 | sl17067 | G0:0016020 | 0.1948 |
| slr2027 | G0:0009260 | <1e-4 | sl11233 | G0:0046128 | <1e-4 | sl11866 | G0:0051188 | <1e-4 | ss17045 | G0:0022857 | <1e-4 | sl11570 | G0:0016020 | 0.1948 |
| sl10060 | G0:0046483 | <1e-4 | sl11510 | G0:0044106 | <1e-4 | slr1419 | G0:0051171 | <1e-4 | slr0923 | G0:0043492 | <1e-4 | ss10467 | G0:0016020 | 0.1948 |
| slr1788 | G0:0009057 | <1e-4 | slr5111 | G0:0050896 | <1e-4 | sl10588 | G0:0006733 | <1e-4 | sl10010 | G0:0022857 | <1e-4 | sl10101 | G0:0016020 | 0.1948 |
| sl10066 | G0:0051186 | <1e-4 | slr0104 | G0:0009150 | <1e-4 | sl11921 | G0:0051171 | <1e-4 | slr8022 | G0:0016746 | <1e-4 | ss15100 | G0:0016020 | 0.1948 |
| ss15091 | G0:0065007 | <1e-4 | sl11160 | G0:0005996 | <1e-4 | slr0924 | G0:0001932 | <1e-4 | sl11659 | G0:0005342 | <1e-4 | sl11089 | G0:0016020 | 0.1948 |



|          |            |       |         |            |       |         |            |       |         |            |       |         |            |        |
|----------|------------|-------|---------|------------|-------|---------|------------|-------|---------|------------|-------|---------|------------|--------|
| slr1956  | G0:0051818 | <1e-4 | slr0491 | G0:0019752 | <1e-4 | ssl0294 | G0:0055082 | <1e-4 | ssl7039 | G0:0043492 | <1e-4 | slr0238 | G0:0016020 | 0.1948 |
| sl10563  | G0:0006163 | <1e-4 | slr1472 | G0:0051186 | <1e-4 | slr0142 | G0:0009260 | <1e-4 | slr1419 | G0:0015405 | <1e-4 | slr1087 | G0:0016020 | 0.1948 |
| sl10414  | G0:0019752 | <1e-4 | ssl0294 | G0:0050794 | <1e-4 | sl11862 | G0:0048518 | <1e-4 | slr1577 | G0:0043492 | <1e-4 | slr1101 | G0:0016020 | 0.1948 |
| slr0082  | G0:0006066 | <1e-4 | ssl2069 | G0:0009263 | <1e-4 | slr2121 | G0:0051171 | <1e-4 | sl10328 | G0:0043167 | <1e-4 | ssl6092 | G0:0016020 | 0.1948 |
| ssl0738  | G0:0042451 | <1e-4 | slr1056 | G0:0051186 | <1e-4 | sl11142 | G0:0050801 | <1e-4 | ssr2047 | G0:0015293 | <1e-4 | sl17078 | G0:0016020 | 0.1948 |
| slr0667  | G0:0034641 | <1e-4 | slr0207 | G0:0009144 | <1e-4 | sl10822 | G0:0072528 | <1e-4 | sl10281 | G0:0016741 | <1e-4 | sl18001 | G0:0016020 | 0.1948 |
| sl11424  | G0:0046394 | <1e-4 | slr6087 | G0:0044283 | <1e-4 | sl11651 | G0:0019222 | <1e-4 | sl11340 | G0:0022836 | <1e-4 | ssr6062 | G0:0016020 | 0.1948 |
| slr7101  | G0:0019362 | <1e-4 | sl10710 | G0:0071554 | <1e-4 | ssr7036 | G0:0006733 | <1e-4 | sl11738 | G0:0022891 | <1e-4 | ssl2064 | G0:0016020 | 0.1948 |
| ssr2803  | G0:0046907 | <1e-4 | slr1600 | G0:0046907 | <1e-4 | slr1263 | G0:0046164 | <1e-4 | ssl5091 | G0:0022891 | <1e-4 | slr0888 | G0:0016020 | 0.1948 |
| slr5111  | G0:0071840 | <1e-4 | sl10413 | G0:0050789 | <1e-4 | sl10031 | G0:0031323 | <1e-4 | ssl2733 | G0:0016462 | <1e-4 | sl10162 | G0:0016020 | 0.1948 |
| slr0058  | G0:0072524 | <1e-4 | slr6031 | G0:0065007 | <1e-4 | ssr2711 | G0:0051347 | <1e-4 | ssl5008 | G0:0022838 | <1e-4 | sl10875 | G0:0016020 | 0.1948 |
| ssr3341  | G0:0009263 | <1e-4 | ssr1528 | G0:0009126 | <1e-4 | slr1519 | G0:0042451 | <1e-4 | sl10265 | G0:0005342 | <1e-4 | slr1563 | G0:0016020 | 0.1948 |
| slr1600  | G0:0031326 | <1e-4 | slr1261 | G0:0009308 | <1e-4 | sl10736 | G0:0072528 | <1e-4 | sl10282 | G0:0022832 | <1e-4 | slr7025 | G0:0006810 | 0.1938 |
| sl10898  | G0:0008610 | <1e-4 | slr2003 | G0:0065007 | <1e-4 | slr1958 | G0:0055082 | <1e-4 | ssr0332 | G0:0022892 | <1e-4 | ssl3383 | G0:0006810 | 0.1938 |
| sl11485  | G0:0006576 | <1e-4 | sl11469 | G0:0043170 | <1e-4 | slr0038 | G0:0051347 | <1e-4 | sl11002 | G0:0022838 | <1e-4 | slr1660 | G0:0006810 | 0.1938 |
| sl17069  | G0:0009117 | <1e-4 | sl11348 | G0:0042180 | <1e-4 | sl15062 | G0:0051188 | <1e-4 | slr1169 | G0:0022832 | <1e-4 | slr0038 | G0:0006810 | 0.1938 |
| slr0780  | G0:0051179 | <1e-4 | slr2052 | G0:0048522 | <1e-4 | ssr2998 | G0:0065007 | <1e-4 | sl10872 | G0:0016746 | <1e-4 | slr0393 | G0:0006810 | 0.1938 |
| slr5037  | G0:0006082 | <1e-4 | ssl1046 | G0:0044271 | <1e-4 | slr1677 | G0:0016052 | <1e-4 | sl18032 | G0:0022892 | <1e-4 | sl11696 | G0:0006810 | 0.1938 |
| sl11921  | G0:0006720 | <1e-4 | ssl1255 | G0:0046394 | <1e-4 | sl10156 | G0:0010556 | <1e-4 | slr0625 | G0:0008171 | <1e-4 | slr2010 | G0:0006810 | 0.1938 |
| sl10394  | G0:0009259 | <1e-4 | slr2084 | G0:0009161 | <1e-4 | slr1270 | G0:0009262 | <1e-4 | ssl2920 | G0:0043167 | <1e-4 | slr1464 | G0:0006810 | 0.1938 |
| slr7037  | G0:0009124 | <1e-4 | sl10160 | G0:0009059 | <1e-4 | slr6033 | G0:0016054 | <1e-4 | sl10148 | G0:0005342 | <1e-4 | slr6021 | G0:0006810 | 0.1938 |
| sl11306  | G0:0009308 | <1e-4 | slr1327 | G0:0051188 | <1e-4 | ssr2754 | G0:0009150 | <1e-4 | sl11858 | G0:0008171 | <1e-4 | slr7016 | G0:0006810 | 0.1938 |
| slr1789  | G0:0072522 | <1e-4 | sl12015 | G0:0034654 | <1e-4 | sl10656 | G0:0042455 | <1e-4 | slr0038 | G0:0016741 | <1e-4 | ssl2920 | G0:0006810 | 0.1938 |
| ssl2717  | G0:0042451 | <1e-4 | slr1275 | G0:0044255 | <1e-4 | sl10596 | G0:0009141 | <1e-4 | sl18012 | G0:0042623 | <1e-4 | ssl3379 | G0:0006810 | 0.1938 |
| sl11166  | G0:0034654 | <1e-4 | ssr1114 | G0:0051188 | <1e-4 | slr1534 | G0:0009142 | <1e-4 | sl11158 | G0:0022803 | <1e-4 | sl11123 | G0:0006810 | 0.1938 |
| slr1998  | G0:0052111 | <1e-4 | ssl3382 | G0:0044260 | <1e-4 | slr0594 | G0:0046394 | <1e-4 | ssr1499 | G0:0016817 | <1e-4 | ssl5129 | G0:0006810 | 0.1938 |
| slr2005  | G0:0048523 | <1e-4 | slr1811 | G0:0043648 | <1e-4 | sl15128 | G0:0033013 | <1e-4 | ssl2420 | G0:0016746 | <1e-4 | sl10742 | G0:0006810 | 0.1938 |
| sl10031  | G0:0022607 | <1e-4 | slr0400 | G0:0050801 | <1e-4 | slr0816 | G0:0043436 | <1e-4 | slr0845 | G0:0008171 | <1e-4 | ssl5098 | G0:0006810 | 0.1938 |
| sl11267  | G0:0051818 | <1e-4 | slr6063 | G0:0071840 | <1e-4 | ssl0350 | G0:0071496 | <1e-4 | slr7071 | G0:0015293 | <1e-4 | sl10167 | G0:0006810 | 0.1938 |
| slr0821  | G0:0034660 | <1e-4 | slr7026 | G0:0009059 | <1e-4 | sl10669 | G0:0071840 | <1e-4 | slr5012 | G0:0003674 | <1e-4 | sl15032 | G0:0006810 | 0.1938 |
| slr0645  | G0:0050896 | <1e-4 | ssr6078 | G0:0009124 | <1e-4 | slr1187 | G0:0006631 | <1e-4 | slr0742 | G0:0015077 | <1e-4 | sl10659 | G0:0006810 | 0.1938 |
| slr0157  | G0:0048522 | <1e-4 | sl11671 | G0:0006082 | <1e-4 | sl11191 | G0:0019222 | <1e-4 | slr0304 | G0:0016818 | <1e-4 | slr1768 | G0:0006810 | 0.1938 |
| sl117047 | G0:0048523 | <1e-4 | sl11925 | G0:0046394 | <1e-4 | sl11289 | G0:0006163 | <1e-4 | ssr8047 | G0:0022836 | <1e-4 | sl10369 | G0:0006810 | 0.1938 |
| slr6104  | G0:0052188 | <1e-4 | slr0975 | G0:0050794 | <1e-4 | sl10266 | G0:0051347 | <1e-4 | sl10031 | G0:0015293 | <1e-4 | slr1179 | G0:0006810 | 0.1938 |
| slr0304  | G0:0009150 | <1e-4 | ssr2802 | G0:0048522 | <1e-4 | sl11455 | G0:0009309 | <1e-4 | sl10749 | G0:0042623 | <1e-4 | slr5018 | G0:0006810 | 0.1938 |
| slr1667  | G0:0005996 | <1e-4 | sl11352 | G0:0005996 | <1e-4 | ssl2807 | G0:0009199 | <1e-4 | sl11832 | G0:0015075 | <1e-4 | ssl1004 | G0:0006810 | 0.1938 |
| ssr1528  | G0:0006766 | <1e-4 | slr0416 | G0:0090304 | <1e-4 | ssr2422 | G0:0006066 | <1e-4 | slr0482 | G0:0015399 | <1e-4 | slr1814 | G0:0006810 | 0.1938 |
| slr1107  | G0:0044275 | <1e-4 | sl11541 | G0:0019751 | <1e-4 | slr1519 | G0:0043436 | <1e-4 | sl11021 | G0:0008171 | <1e-4 | slr0049 | G0:0006810 | 0.1938 |
| sl10980  | G0:0009892 | <1e-4 | ssl2384 | G0:0043648 | <1e-4 | slr0818 | G0:0005996 | <1e-4 | sl10595 | G0:0022803 | <1e-4 | ssr7036 | G0:0006810 | 0.1938 |
| sl15034  | G0:0009132 | <1e-4 | slr1699 | G0:0044283 | <1e-4 | sl11163 | G0:0043933 | <1e-4 | slr0545 | G0:0022891 | <1e-4 | sl10284 | G0:0006810 | 0.1938 |
| ssl6061  | G0:0042451 | <1e-4 | ssl5091 | G0:0009309 | <1e-4 | slr0148 | G0:0006732 | <1e-4 | sl11737 | G0:0016818 | <1e-4 | slr0145 | G0:0006810 | 0.1938 |
| slr6103  | G0:0009124 | <1e-4 | slr0269 | G0:0065007 | <1e-4 | slr0656 | G0:0006733 | <1e-4 | sl11606 | G0:0022857 | <1e-4 | slr0179 | G0:0006810 | 0.1938 |
| sl10827  | G0:0009144 | <1e-4 | slr0888 | G0:0044271 | <1e-4 | slr0935 | G0:0009161 | <1e-4 | sl11025 | G0:0015075 | <1e-4 | sl12013 | G0:0006810 | 0.1938 |
| sl11956  | G0:0009123 | <1e-4 | slr1177 | G0:0048522 | <1e-4 | slr1896 | G0:0008150 | <1e-4 | sl10763 | G0:0043492 | <1e-4 | slr1484 | G0:0006810 | 0.1938 |
| slr0780  | G0:0034654 | <1e-4 | ssr2422 | G0:0060255 | <1e-4 | sl11541 | G0:0008150 | <1e-4 | sl11528 | G0:0060089 | <1e-4 | sl10761 | G0:0006810 | 0.1938 |
| slr1174  | G0:0006811 | <1e-4 | sl10488 | G0:0006091 | <1e-4 | slr6087 | G0:0043549 | <1e-4 | slr1627 | G0:0015291 | <1e-4 | ssr6085 | G0:0006810 | 0.1938 |
| sl10412  | G0:0008150 | <1e-4 | sgl0001 | G0:0019751 | <1e-4 | sl11938 | G0:0009259 | <1e-4 | slr0285 | G0:0016817 | <1e-4 | ssl1520 | G0:0006810 | 0.1938 |
| slr1573  | G0:0009263 | <1e-4 | ssl2749 | G0:0051171 | <1e-4 | slr0813 | G0:0048518 | <1e-4 | slr1612 | G0:0003674 | <1e-4 | slr6074 | G0:0006810 | 0.1938 |
| sl15046  | G0:0043412 | <1e-4 | slr0712 | G0:0055082 | <1e-4 | slr0400 | G0:0009124 | <1e-4 | slr1911 | G0:0022890 | <1e-4 | ssr1766 | G0:0006810 | 0.1938 |
| slr1788  | G0:0048523 | <1e-4 | sl11109 | G0:0046128 | <1e-4 | slr0398 | G0:0044282 | <1e-4 | slr0482 | G0:0016818 | <1e-4 | sl11359 | G0:0006810 | 0.1938 |
| slr0250  | G0:0001932 | <1e-4 | sl15046 | G0:0019219 | <1e-4 | slr0876 | G0:0042180 | <1e-4 | sl11634 | G0:0043167 | <1e-4 | sl11469 | G0:0006810 | 0.1938 |
| sl10980  | G0:0009308 | <1e-4 | sl11714 | G0:0009124 | <1e-4 | slr1603 | G0:0052188 | <1e-4 | slr0981 | G0:0060089 | <1e-4 | sl11400 | G0:0006810 | 0.1938 |
| slr1513  | G0:0043648 | <1e-4 | sl10781 | G0:0009057 | <1e-4 | ssr0109 | G0:0031323 | <1e-4 | slr0104 | G0:0015399 | <1e-4 | ssl8005 | G0:0006810 | 0.1938 |
| ssr5019  | G0:0051234 | <1e-4 | sl11902 | G0:0006576 | <1e-4 | slr1365 | G0:0019222 | <1e-4 | sl11240 | G0:0015291 | <1e-4 | sl15090 | G0:0006810 | 0.1938 |

|         |            |       |         |            |       |         |            |       |         |            |       |         |            |        |
|---------|------------|-------|---------|------------|-------|---------|------------|-------|---------|------------|-------|---------|------------|--------|
| sl11505 | G0:0051347 | <1e-4 | slr2144 | G0:0034654 | <1e-4 | slr1023 | G0:0044003 | <1e-4 | sl10710 | G0:0005342 | <1e-4 | sl10857 | G0:0006810 | 0.1938 |
| slr1258 | G0:0046483 | <1e-4 | slr0664 | G0:0009889 | <1e-4 | slr1150 | G0:0080090 | <1e-4 | sl10060 | G0:0022838 | <1e-4 | sl11109 | G0:0006810 | 0.1938 |
| slr1339 | G0:0009150 | <1e-4 | slr1464 | G0:0048518 | <1e-4 | slr1674 | G0:0019751 | <1e-4 | sl10321 | G0:0022803 | <1e-4 | sl10174 | G0:0006810 | 0.1938 |
| ss15129 | G0:0016053 | <1e-4 | ssr2754 | G0:0044275 | <1e-4 | slr0211 | G0:0022607 | <1e-4 | sl15044 | G0:0015405 | <1e-4 | slr6039 | G0:0006810 | 0.1938 |
| slr1079 | G0:0006066 | <1e-4 | ssl0294 | G0:0008150 | <1e-4 | slr1957 | G0:0051234 | <1e-4 | sl10762 | G0:0042623 | <1e-4 | ss12781 | G0:0006810 | 0.1938 |
| sl11735 | G0:0006631 | <1e-4 | ssl2920 | G0:0006811 | <1e-4 | slr0172 | G0:0006631 | <1e-4 | slr5127 | G0:0016817 | <1e-4 | sl10760 | G0:0006810 | 0.1938 |
| slr0211 | G0:0009150 | <1e-4 | slr7100 | G0:0072522 | <1e-4 | slr1590 | G0:0006811 | <1e-4 | slr1301 | G0:0016817 | <1e-4 | slr1270 | G0:0006810 | 0.1938 |
| slr1957 | G0:0008150 | <1e-4 | sl10930 | G0:0044003 | <1e-4 | sl15030 | G0:0009059 | <1e-4 | sl10216 | G0:0043167 | <1e-4 | sl12015 | G0:0006810 | 0.1938 |
| sl10858 | G0:0071840 | <1e-4 | ssl1377 | G0:0010556 | <1e-4 | sl10751 | G0:0048518 | <1e-4 | sl10931 | G0:0042623 | <1e-4 | slr0870 | G0:0006810 | 0.1938 |
| sl10888 | G0:0006066 | <1e-4 | ssr2333 | G0:0006793 | <1e-4 | sl11934 | G0:0034641 | <1e-4 | sl10175 | G0:0016741 | <1e-4 | slr1546 | G0:0006810 | 0.1938 |
| sl10775 | G0:0050801 | <1e-4 | ssr1375 | G0:0009056 | <1e-4 | slr0192 | G0:0006811 | <1e-4 | ssr1155 | G0:0043167 | <1e-4 | slr1362 | G0:0006810 | 0.1938 |
| sl11092 | G0:0009123 | <1e-4 | slr1266 | G0:0009057 | <1e-4 | sl10843 | G0:0019752 | <1e-4 | sl11022 | G0:0022891 | <1e-4 | sl10328 | G0:0006810 | 0.1938 |
| slr5119 | G0:0006811 | <1e-4 | slr6051 | G0:0022411 | <1e-4 | ss10350 | G0:0034641 | <1e-4 | sl18007 | G0:0022838 | <1e-4 | slr1927 | G0:0006810 | 0.1938 |
| slr1813 | G0:0006082 | <1e-4 | slr7014 | G0:0006576 | <1e-4 | slr0941 | G0:0044275 | <1e-4 | slr0602 | G0:0022857 | <1e-4 | slr0092 | G0:0006810 | 0.1938 |
| slr0978 | G0:0080090 | <1e-4 | slr0729 | G0:0044260 | <1e-4 | sl10539 | G0:0009893 | <1e-4 | slr5111 | G0:0016817 | <1e-4 | sl11884 | G0:0006810 | 0.1938 |
| slr1780 | G0:0045184 | <1e-4 | sl10905 | G0:0050794 | <1e-4 | sl10265 | G0:0044248 | <1e-4 | sl18001 | G0:0016746 | <1e-4 | ss13142 | G0:0006810 | 0.1938 |
| sl11995 | G0:0044281 | <1e-4 | slr0909 | G0:0009260 | <1e-4 | sl10982 | G0:0080090 | <1e-4 | sl11769 | G0:0043167 | <1e-4 | sl11773 | G0:0006810 | 0.1938 |
| slr0924 | G0:0044281 | <1e-4 | slr1557 | G0:0019752 | <1e-4 | slr7081 | G0:0042180 | <1e-4 | sl11304 | G0:0043492 | <1e-4 | sl10802 | G0:0006810 | 0.1938 |
| sl10861 | G0:0006793 | <1e-4 | slr0172 | G0:0008150 | <1e-4 | ssr5121 | G0:0009059 | <1e-4 | slr0865 | G0:0008171 | <1e-4 | slr0959 | G0:0006810 | 0.1938 |
| slr0712 | G0:0009117 | <1e-4 | slr1222 | G0:0009150 | <1e-4 | slr0243 | G0:0009141 | <1e-4 | sl10446 | G0:0016741 | <1e-4 | sl15130 | G0:0006810 | 0.1938 |
| sl11247 | G0:0009059 | <1e-4 | ssr0692 | G0:0072522 | <1e-4 | slr0479 | G0:0019222 | <1e-4 | slr1998 | G0:0015399 | <1e-4 | slr1162 | G0:0006810 | 0.1938 |
| sl10524 | G0:0044275 | <1e-4 | sl11660 | G0:0048878 | <1e-4 | ss11263 | G0:0065007 | <1e-4 | sl10872 | G0:0022832 | <1e-4 | sl10762 | G0:0006810 | 0.1938 |
| slr6091 | G0:0051716 | <1e-4 | sl11250 | G0:0022607 | <1e-4 | slr7071 | G0:0009394 | <1e-4 | sl10319 | G0:0015293 | <1e-4 | sl11921 | G0:0006810 | 0.1938 |
| sl10669 | G0:0009117 | <1e-4 | slr0607 | G0:0065007 | <1e-4 | slr1188 | G0:0051246 | <1e-4 | sl12006 | G0:0022892 | <1e-4 | slr1103 | G0:0006810 | 0.1938 |
| ss15007 | G0:0043412 | <1e-4 | slr0980 | G0:0055082 | <1e-4 | sl10762 | G0:0051186 | <1e-4 | ss13573 | G0:0060089 | <1e-4 | sl10176 | G0:0006810 | 0.1938 |
| sl10756 | G0:0019222 | <1e-4 | ssr6099 | G0:0043549 | <1e-4 | ssr2912 | G0:0050896 | <1e-4 | sl10905 | G0:0022857 | <1e-4 | sl11265 | G0:0006810 | 0.1938 |
| ssr2554 | G0:0050801 | <1e-4 | sl10543 | G0:0034654 | <1e-4 | ssr3129 | G0:0006811 | <1e-4 | sl10406 | G0:0022890 | <1e-4 | sl11203 | G0:0006810 | 0.1938 |
| ssr1041 | G0:0052188 | <1e-4 | sl10863 | G0:0018130 | <1e-4 | slr0023 | G0:0043549 | <1e-4 | slr0887 | G0:0003674 | <1e-4 | sl11764 | G0:0006810 | 0.1938 |
| slr1957 | G0:0044260 | <1e-4 | slr1188 | G0:0044283 | <1e-4 | sl10451 | G0:0071554 | <1e-4 | sl15062 | G0:0016818 | <1e-4 | slr1276 | G0:0006810 | 0.1938 |
| slr0981 | G0:0050789 | <1e-4 | sl10861 | G0:0048522 | <1e-4 | sl11201 | G0:0090304 | <1e-4 | slr1980 | G0:0016746 | <1e-4 | ss12148 | G0:0006810 | 0.1938 |
| sl11373 | G0:0006733 | <1e-4 | sl10661 | G0:0044260 | <1e-4 | slr1161 | G0:0044003 | <1e-4 | slr0168 | G0:0015405 | <1e-4 | slr0333 | G0:0006810 | 0.1938 |
| ss12717 | G0:0060255 | <1e-4 | slr7058 | G0:0044003 | <1e-4 | sl10676 | G0:0006082 | <1e-4 | sl10298 | G0:0022890 | <1e-4 | ss11417 | G0:0006810 | 0.1938 |
| ss11520 | G0:0019222 | <1e-4 | sl10478 | G0:0072524 | <1e-4 | sl11040 | G0:0072527 | <1e-4 | slr2071 | G0:0003674 | <1e-4 | slr6038 | G0:0006810 | 0.1938 |
| sl11396 | G0:0051188 | <1e-4 | slr1544 | G0:0051188 | <1e-4 | slr0184 | G0:0006733 | <1e-4 | slr1915 | G0:0016817 | <1e-4 | ssr5020 | G0:0006810 | 0.1938 |
| sl11512 | G0:0044275 | <1e-4 | sl10183 | G0:0006720 | <1e-4 | ss18005 | G0:0009161 | <1e-4 | slr0872 | G0:0008171 | <1e-4 | slr7011 | G0:0006810 | 0.1938 |
| sl11738 | G0:0044260 | <1e-4 | ssr2142 | G0:0009142 | <1e-4 | slr0038 | G0:0071554 | <1e-4 | sl10669 | G0:0022890 | <1e-4 | sl11735 | G0:0006810 | 0.1938 |
| slr1327 | G0:0044275 | <1e-4 | slr0887 | G0:0031640 | <1e-4 | slr0885 | G0:0072524 | <1e-4 | slr5119 | G0:0022836 | <1e-4 | ssr1951 | G0:0006810 | 0.1938 |
| slr1287 | G0:0009991 | <1e-4 | slr0863 | G0:0051716 | <1e-4 | slr1056 | G0:0072528 | <1e-4 | slr0923 | G0:0015399 | <1e-4 | sl10478 | G0:0006810 | 0.1938 |
| slr1163 | G0:0051716 | <1e-4 | sl10839 | G0:0051188 | <1e-4 | sl11414 | G0:0006732 | <1e-4 | slr1365 | G0:0008171 | <1e-4 | sl11651 | G0:0006810 | 0.1938 |
| slr6106 | G0:0051246 | <1e-4 | sl17070 | G0:0052111 | <1e-4 | slr0579 | G0:0071554 | <1e-4 | ss15114 | G0:0015075 | <1e-4 | sl11571 | G0:0006810 | 0.1938 |
| slr5119 | G0:0009144 | <1e-4 | slr1866 | G0:0051179 | <1e-4 | sl15046 | G0:0009132 | <1e-4 | sl11232 | G0:0003674 | <1e-4 | sl10406 | G0:0006810 | 0.1938 |
| slr1927 | G0:0009309 | <1e-4 | slr8044 | G0:0072528 | <1e-4 | slr1544 | G0:0051347 | <1e-4 | slr2118 | G0:0022832 | <1e-4 | sl10815 | G0:0006810 | 0.1938 |
| slr6049 | G0:0009117 | <1e-4 | ss10739 | G0:0065007 | <1e-4 | ssr3410 | G0:0009892 | <1e-4 | sl10101 | G0:0042623 | <1e-4 | slr0146 | G0:0006810 | 0.1938 |
| slr2018 | G0:0050896 | <1e-4 | ssr0536 | G0:0080090 | <1e-4 | sl10183 | G0:0048519 | <1e-4 | ss10461 | G0:0042623 | <1e-4 | slr0362 | G0:0006810 | 0.1938 |
| ss18008 | G0:0072521 | <1e-4 | sl11505 | G0:0055086 | <1e-4 | sl11692 | G0:0009259 | <1e-4 | slr1436 | G0:0016462 | <1e-4 | sl11769 | G0:0006810 | 0.1938 |
| slr0937 | G0:0042180 | <1e-4 | ssr1951 | G0:0009144 | <1e-4 | slr1073 | G0:0048522 | <1e-4 | sl11863 | G0:0015405 | <1e-4 | sl10023 | G0:0006810 | 0.1937 |
| slr1568 | G0:0034660 | <1e-4 | slr0890 | G0:0006576 | <1e-4 | ssr0761 | G0:0009309 | <1e-4 | slr5116 | G0:0015267 | <1e-4 | sl10355 | G0:0006810 | 0.1937 |
| slr0360 | G0:0048522 | <1e-4 | slr0816 | G0:0009117 | <1e-4 | sl15132 | G0:0048519 | <1e-4 | ss10109 | G0:0022803 | <1e-4 | sl10007 | G0:0006810 | 0.1937 |
| slr7099 | G0:0045184 | <1e-4 | sl10428 | G0:0006793 | <1e-4 | slr0551 | G0:0051818 | <1e-4 | ss11690 | G0:0008171 | <1e-4 | sl11613 | G0:0006810 | 0.1937 |
| sl10442 | G0:0019222 | <1e-4 | slr0964 | G0:0022607 | <1e-4 | slr0865 | G0:0009889 | <1e-4 | sl10596 | G0:0022892 | <1e-4 | slr2121 | G0:0006810 | 0.1937 |
| sl11350 | G0:0008150 | <1e-4 | slr0468 | G0:0006732 | <1e-4 | sl11509 | G0:0051171 | <1e-4 | sl18012 | G0:0016817 | <1e-4 | ssr2439 | G0:0006810 | 0.1937 |
| sl10925 | G0:0055086 | <1e-4 | slr1174 | G0:0006793 | <1e-4 | slr0038 | G0:0006220 | <1e-4 | sl10413 | G0:0015077 | <1e-4 | slr2144 | G0:0006810 | 0.1937 |
| sl11528 | G0:0006811 | <1e-4 | slr1258 | G0:0008150 | <1e-4 | ssr6086 | G0:0001932 | <1e-4 | slr1152 | G0:0003674 | <1e-4 | slr0364 | G0:0006810 | 0.1937 |
| sl10647 | G0:0009991 | <1e-4 | sl17090 | G0:0072528 | <1e-4 | ss11552 | G0:0006766 | <1e-4 | slr0871 | G0:0022838 | <1e-4 | slr2073 | G0:0006810 | 0.1937 |

|         |            |       |         |            |       |         |            |       |         |            |       |         |            |        |
|---------|------------|-------|---------|------------|-------|---------|------------|-------|---------|------------|-------|---------|------------|--------|
| sl10857 | G0:0044283 | <1e-4 | slr0386 | G0:0016052 | <1e-4 | sl11348 | G0:0009987 | <1e-4 | sl15044 | G0:0043167 | <1e-4 | sl10237 | G0:0006810 | 0.1937 |
| sl10447 | G0:0009259 | <1e-4 | slr0211 | G0:0072521 | <1e-4 | ss18008 | G0:0043412 | <1e-4 | slr7091 | G0:0042623 | <1e-4 | slr0192 | G0:0006810 | 0.1937 |
| slr0789 | G0:0009893 | <1e-4 | sl11447 | G0:0051188 | <1e-4 | slr1800 | G0:0019362 | <1e-4 | slr0496 | G0:0016817 | <1e-4 | ssr2551 | G0:0006810 | 0.1937 |
| slr1162 | G0:0044255 | <1e-4 | slr1613 | G0:0042451 | <1e-4 | slr1493 | G0:0016052 | <1e-4 | sl10394 | G0:0008171 | <1e-4 | sl10524 | G0:0006810 | 0.1937 |
| ssr6030 | G0:0051188 | <1e-4 | sl10886 | G0:0045184 | <1e-4 | sl10703 | G0:0044281 | <1e-4 | sl10369 | G0:0005342 | <1e-4 | sl11830 | G0:0006810 | 0.1937 |
| sl11950 | G0:0009142 | <1e-4 | slr0294 | G0:0034660 | <1e-4 | slr1052 | G0:0048523 | <1e-4 | slr0625 | G0:0016462 | <1e-4 | slr1788 | G0:0006810 | 0.1937 |
| sl10071 | G0:0009309 | <1e-4 | slr0980 | G0:0042180 | <1e-4 | slr1807 | G0:0044282 | <1e-4 | slr1441 | G0:0022891 | <1e-4 | slr0482 | G0:0006810 | 0.1937 |
| sl10752 | G0:0051347 | <1e-4 | ssr3467 | G0:0009165 | <1e-4 | sl11109 | G0:0006163 | <1e-4 | slr1668 | G0:0022836 | <1e-4 | slr1572 | G0:0006810 | 0.1937 |
| slr1780 | G0:0046907 | <1e-4 | slr1628 | G0:0006721 | <1e-4 | sl11131 | G0:0016052 | <1e-4 | slr1807 | G0:0015077 | <1e-4 | slr0204 | G0:0006810 | 0.1937 |
| sl17062 | G0:0044260 | <1e-4 | sl10661 | G0:0009117 | <1e-4 | ssr2802 | G0:0010556 | <1e-4 | sl10265 | G0:0015267 | <1e-4 | sl10756 | G0:0006810 | 0.1937 |
| slr0914 | G0:0050801 | <1e-4 | sl11486 | G0:0009165 | <1e-4 | sm10011 | G0:0044271 | <1e-4 | slr1519 | G0:0015291 | <1e-4 | sl10325 | G0:0006810 | 0.1937 |
| slr0890 | G0:0009893 | <1e-4 | sl11775 | G0:0071496 | <1e-4 | sl10762 | G0:0009126 | <1e-4 | sl11562 | G0:0043492 | <1e-4 | slr1885 | G0:0006810 | 0.1937 |
| sl11222 | G0:0034641 | <1e-4 | slr1809 | G0:0009308 | <1e-4 | slr6049 | G0:0009260 | <1e-4 | slr0545 | G0:0042623 | <1e-4 | slr0845 | G0:0006810 | 0.1937 |
| sl17034 | G0:0009132 | <1e-4 | ssr0536 | G0:0065007 | <1e-4 | sl10301 | G0:0043549 | <1e-4 | sl10585 | G0:0042623 | <1e-4 | slr0586 | G0:0006810 | 0.1937 |
| sl10216 | G0:0009126 | <1e-4 | sl11797 | G0:0008150 | <1e-4 | sl11634 | G0:0051716 | <1e-4 | sl11715 | G0:0042623 | <1e-4 | sl11658 | G0:0006810 | 0.1937 |
| sl11832 | G0:0042455 | <1e-4 | slr1034 | G0:0052188 | <1e-4 | slr0345 | G0:0016053 | <1e-4 | slr0816 | G0:0015077 | <1e-4 | sl11954 | G0:0006810 | 0.1937 |
| sl11173 | G0:0042180 | <1e-4 | ssr2843 | G0:0016053 | <1e-4 | slr0169 | G0:0006766 | <1e-4 | slr1819 | G0:0016817 | <1e-4 | slr1593 | G0:0006810 | 0.1937 |
| slr0204 | G0:0051179 | <1e-4 | slr6106 | G0:0044281 | <1e-4 | slr1034 | G0:0009987 | <1e-4 | sl11835 | G0:0016741 | <1e-4 | slr1262 | G0:0006810 | 0.1937 |
| ssr0536 | G0:0006793 | <1e-4 | slr0058 | G0:0009117 | <1e-4 | ss13692 | G0:0052188 | <1e-4 | sl11390 | G0:0016462 | <1e-4 | sl11006 | G0:0006810 | 0.1937 |
| sl10478 | G0:0009262 | <1e-4 | sl10875 | G0:0009199 | <1e-4 | sl10669 | G0:0019362 | <1e-4 | ssr1155 | G0:0022892 | <1e-4 | slr1676 | G0:0006810 | 0.1937 |
| ss12148 | G0:0009056 | <1e-4 | slr0869 | G0:0043933 | <1e-4 | slr5073 | G0:0009150 | <1e-4 | ss17045 | G0:0015267 | <1e-4 | ss12065 | G0:0006810 | 0.1937 |
| sl11613 | G0:0042455 | <1e-4 | slr8014 | G0:0006082 | <1e-4 | ss17022 | G0:0051716 | <1e-4 | ss17048 | G0:0008171 | <1e-4 | sl10414 | G0:0006810 | 0.1937 |
| slr6016 | G0:0071496 | <1e-4 | sl10886 | G0:0006066 | <1e-4 | slr0975 | G0:0065007 | <1e-4 | sl18002 | G0:0015075 | <1e-4 | sl11630 | G0:0006810 | 0.1937 |
| sl10175 | G0:0071842 | <1e-4 | ss15096 | G0:0046907 | <1e-4 | sl10272 | G0:0034654 | <1e-4 | sl10350 | G0:0005342 | <1e-4 | ssr2781 | G0:0006810 | 0.193  |
| sl11640 | G0:0010468 | <1e-4 | sl10008 | G0:0016053 | <1e-4 | ssr6086 | G0:0071842 | <1e-4 | sl10732 | G0:0022803 | <1e-4 | slr0317 | G0:0006810 | 0.193  |
| slr1362 | G0:0010556 | <1e-4 | slr5101 | G0:0071842 | <1e-4 | sl10909 | G0:0006721 | <1e-4 | sl11399 | G0:0016818 | <1e-4 | slr0408 | G0:0006810 | 0.193  |
| sl11738 | G0:0006793 | <1e-4 | slr6104 | G0:0050794 | <1e-4 | sl10359 | G0:0009059 | <1e-4 | slr1178 | G0:0015075 | <1e-4 | sl10103 | G0:0006810 | 0.193  |
| ss11046 | G0:0034660 | <1e-4 | ss13379 | G0:0044106 | <1e-4 | slr0305 | G0:0019222 | <1e-4 | sl11355 | G0:0042623 | <1e-4 | slr2084 | G0:0006810 | 0.193  |
| sl10068 | G0:0031640 | <1e-4 | slr7073 | G0:0009889 | <1e-4 | sl10478 | G0:0009987 | <1e-4 | sl10487 | G0:0003674 | <1e-4 | sl10071 | G0:0006810 | 0.193  |
| sl11273 | G0:0043436 | <1e-4 | sl18012 | G0:0044260 | <1e-4 | sl10595 | G0:0046394 | <1e-4 | sl10424 | G0:0022832 | <1e-4 | sl11902 | G0:0006810 | 0.193  |
| slr6103 | G0:0019362 | <1e-4 | sl10997 | G0:0071840 | <1e-4 | sl10503 | G0:0006163 | <1e-4 | slr0145 | G0:0015267 | <1e-4 | ssr1258 | G0:0006810 | 0.193  |
| slr0442 | G0:0051179 | <1e-4 | sl11306 | G0:0065007 | <1e-4 | sl11469 | G0:0071841 | <1e-4 | slr0509 | G0:0016746 | <1e-4 | ssr2803 | G0:0006810 | 0.193  |
| slr1071 | G0:0009394 | <1e-4 | sl11651 | G0:0034641 | <1e-4 | sl10608 | G0:0009142 | <1e-4 | slr2000 | G0:0015077 | <1e-4 | slr0980 | G0:0006810 | 0.193  |
| slr1472 | G0:0006811 | <1e-4 | sl11426 | G0:0006721 | <1e-4 | slr5023 | G0:0071554 | <1e-4 | ssr3304 | G0:0060089 | <1e-4 | slr0848 | G0:0006810 | 0.193  |
| slr1241 | G0:0051186 | <1e-4 | ssr1473 | G0:0042451 | <1e-4 | ss11255 | G0:0009057 | <1e-4 | sl10781 | G0:0015077 | <1e-4 | slr0919 | G0:0006810 | 0.193  |
| sl11247 | G0:0031326 | <1e-4 | sl11173 | G0:0043170 | <1e-4 | slr6031 | G0:0016053 | <1e-4 | sl11132 | G0:0003674 | <1e-4 | sl10558 | G0:0006810 | 0.1918 |
| sl10048 | G0:0034660 | <1e-4 | ss13379 | G0:0033013 | <1e-4 | slr0169 | G0:0009263 | <1e-4 | sl11380 | G0:0015075 | <1e-4 | sl11751 | G0:0006810 | 0.1918 |
| slr0408 | G0:0071842 | <1e-4 | sl10022 | G0:0043436 | <1e-4 | ss11498 | G0:0006721 | <1e-4 | ssr0536 | G0:0016462 | <1e-4 | slr1851 | G0:0006810 | 0.1918 |
| sl10497 | G0:0033013 | <1e-4 | slr7097 | G0:0046483 | <1e-4 | slr5127 | G0:0019362 | <1e-4 | ss12064 | G0:0022838 | <1e-4 | sl10208 | G0:0006810 | 0.1918 |
| slr1726 | G0:0044282 | <1e-4 | slr1174 | G0:0050789 | <1e-4 | slr1811 | G0:0009132 | <1e-4 | ssr3467 | G0:0015291 | <1e-4 | sl11562 | G0:0006810 | 0.1918 |
| slr1398 | G0:0051716 | <1e-4 | slr0545 | G0:0019219 | <1e-4 | slr0670 | G0:0006793 | <1e-4 | slr6028 | G0:0016817 | <1e-4 | sl10783 | G0:0006810 | 0.1918 |
| slr1815 | G0:0010468 | <1e-4 | ssr3570 | G0:0019219 | <1e-4 | slr2048 | G0:0006091 | <1e-4 | slr1647 | G0:0022832 | <1e-4 | slr0978 | G0:0006810 | 0.1918 |
| slr0637 | G0:0048522 | <1e-4 | slr6080 | G0:0009150 | <1e-4 | sl10436 | G0:0065007 | <1e-4 | sl11939 | G0:0043167 | <1e-4 | slr0607 | G0:0006810 | 0.1918 |
| ssr3532 | G0:0072521 | <1e-4 | sl11447 | G0:0051179 | <1e-4 | ssr3570 | G0:0046483 | <1e-4 | sl10676 | G0:0022891 | <1e-4 | slr1307 | G0:0006810 | 0.1918 |
| slr1571 | G0:0072528 | <1e-4 | sl10752 | G0:0034654 | <1e-4 | slr1262 | G0:0009987 | <1e-4 | slr2110 | G0:0015399 | <1e-4 | slr1865 | G0:0006810 | 0.1918 |
| slr0816 | G0:0043648 | <1e-4 | slr0545 | G0:0048878 | <1e-4 | slr1103 | G0:0044260 | <1e-4 | slr7100 | G0:0022838 | <1e-4 | ss10750 | G0:0016491 | 0.1889 |
| slr0976 | G0:0009144 | <1e-4 | slr1098 | G0:0042180 | <1e-4 | sl10048 | G0:0006163 | <1e-4 | ss18003 | G0:0022836 | <1e-4 | sl11293 | G0:0016491 | 0.1889 |
| ssr3570 | G0:0031326 | <1e-4 | slr8022 | G0:0051347 | <1e-4 | sl11630 | G0:0050896 | <1e-4 | sl10584 | G0:0015075 | <1e-4 | sl11763 | G0:0016491 | 0.1889 |
| ss13142 | G0:0044271 | <1e-4 | ss11498 | G0:0071554 | <1e-4 | ss10294 | G0:0009199 | <1e-4 | slr0728 | G0:0015291 | <1e-4 | ss10294 | G0:0016491 | 0.1889 |
| sl11906 | G0:0006793 | <1e-4 | sl10066 | G0:0055086 | <1e-4 | sl11477 | G0:0048878 | <1e-4 | sl10071 | G0:0015291 | <1e-4 | sl10931 | G0:0016491 | 0.1861 |
| sl10310 | G0:0019362 | <1e-4 | ssr2067 | G0:0006720 | <1e-4 | slr0959 | G0:0009892 | <1e-4 | slr0269 | G0:0005342 | <1e-4 | slr1052 | G0:0016491 | 0.1861 |
| sl11797 | G0:0016053 | <1e-4 | ss12920 | G0:0006753 | <1e-4 | sl10925 | G0:0031323 | <1e-4 | sl10496 | G0:0016817 | <1e-4 | sl10252 | G0:0016491 | 0.184  |
| slr0211 | G0:0006721 | <1e-4 | slr0907 | G0:0048518 | <1e-4 | sl18007 | G0:0046128 | <1e-4 | slr0148 | G0:0043167 | <1e-4 | slr1240 | G0:0000166 | 0.1822 |
| sl10488 | G0:0016052 | <1e-4 | ss12814 | G0:0009059 | <1e-4 | slr1866 | G0:0052111 | <1e-4 | slr1150 | G0:0043492 | <1e-4 | sl11372 | G0:0000166 | 0.1822 |

|         |            |       |         |            |       |         |            |       |         |            |       |         |            |        |
|---------|------------|-------|---------|------------|-------|---------|------------|-------|---------|------------|-------|---------|------------|--------|
| slr1800 | G0:0009161 | <1e-4 | s112011 | G0:0043549 | <1e-4 | slr1935 | G0:0048523 | <1e-4 | ssr0332 | G0:0008171 | <1e-4 | ssr1528 | G0:0000166 | 0.1822 |
| slr1074 | G0:0010468 | <1e-4 | slr0554 | G0:0044248 | <1e-4 | s110982 | G0:0009124 | <1e-4 | slr0498 | G0:0015077 | <1e-4 | s111173 | G0:0000166 | 0.1822 |
| s110614 | G0:0019752 | <1e-4 | s111123 | G0:0019222 | <1e-4 | s111188 | G0:0044275 | <1e-4 | s111961 | G0:0003674 | <1e-4 | s110997 | G0:0000166 | 0.1822 |
| slr2010 | G0:0042180 | <1e-4 | s110815 | G0:0009150 | <1e-4 | slr7024 | G0:0072528 | <1e-4 | s111006 | G0:0022890 | <1e-4 | slr0789 | G0:0000166 | 0.1822 |
| slr0505 | G0:0044275 | <1e-4 | ssl2996 | G0:0051347 | <1e-4 | slr1062 | G0:0016053 | <1e-4 | s111696 | G0:0060089 | <1e-4 | slr0456 | G0:0000166 | 0.1822 |
| slr0582 | G0:0051818 | <1e-4 | s110783 | G0:0006793 | <1e-4 | slr1896 | G0:0019222 | <1e-4 | slr1142 | G0:0016741 | <1e-4 | slr0650 | G0:0000166 | 0.1822 |
| s111601 | G0:0071554 | <1e-4 | ssr6002 | G0:0006163 | <1e-4 | s110157 | G0:0072521 | <1e-4 | ssr7017 | G0:0016462 | <1e-4 | s111582 | G0:0000166 | 0.1822 |
| ssl5025 | G0:0045184 | <1e-4 | slr1957 | G0:0006721 | <1e-4 | slr0919 | G0:0034660 | <1e-4 | s110863 | G0:0015267 | <1e-4 | s110539 | G0:0000166 | 0.1822 |
| s111691 | G0:0071554 | <1e-4 | ssr2912 | G0:0006811 | <1e-4 | s111873 | G0:0031323 | <1e-4 | s110939 | G0:0015291 | <1e-4 | slr2005 | G0:0000166 | 0.1822 |
| slr1188 | G0:0009117 | <1e-4 | slr1568 | G0:0043412 | <1e-4 | s111476 | G0:0046164 | <1e-4 | slr0250 | G0:0022803 | <1e-4 | s110449 | G0:0000166 | 0.1822 |
| s117028 | G0:0043412 | <1e-4 | s110760 | G0:0051246 | <1e-4 | s117028 | G0:0048878 | <1e-4 | s111608 | G0:0060089 | <1e-4 | slr1209 | G0:0000166 | 0.1822 |
| s110237 | G0:0044003 | <1e-4 | slr1429 | G0:0051171 | <1e-4 | ssl0788 | G0:0009259 | <1e-4 | slr0103 | G0:0022857 | <1e-4 | slr0924 | G0:0000166 | 0.1822 |
| s110843 | G0:0016054 | <1e-4 | slr1863 | G0:0046907 | <1e-4 | slr0598 | G0:0051171 | <1e-4 | slr0582 | G0:0022803 | <1e-4 | slr0249 | G0:0000166 | 0.1822 |
| s111912 | G0:0009126 | <1e-4 | slr0907 | G0:0009123 | <1e-4 | s110811 | G0:0006733 | <1e-4 | slr0333 | G0:0015077 | <1e-4 | slr1590 | G0:0000166 | 0.1822 |
| slr1122 | G0:0006766 | <1e-4 | ssl5098 | G0:0052188 | <1e-4 | s111095 | G0:0044260 | <1e-4 | slr1851 | G0:0022803 | <1e-4 | s110595 | G0:0000166 | 0.1822 |
| s111906 | G0:0051188 | <1e-4 | s111763 | G0:0071841 | <1e-4 | slr1169 | G0:0072528 | <1e-4 | s110888 | G0:0015399 | <1e-4 | s110752 | G0:0000166 | 0.1822 |
| s111241 | G0:0071841 | <1e-4 | s111752 | G0:0055082 | <1e-4 | s110875 | G0:0050896 | <1e-4 | s118032 | G0:0016818 | <1e-4 | slr1303 | G0:0000166 | 0.1822 |
| slr0863 | G0:0046483 | <1e-4 | s111911 | G0:0046164 | <1e-4 | s111652 | G0:0055114 | <1e-4 | slr6091 | G0:0015291 | <1e-4 | sm10011 | G0:0000166 | 0.1822 |
| slr1657 | G0:0009126 | <1e-4 | slr1926 | G0:0006576 | <1e-4 | slr5023 | G0:0006811 | <1e-4 | slr1519 | G0:0022857 | <1e-4 | slr1258 | G0:0000166 | 0.1822 |
| slr1170 | G0:0044106 | <1e-4 | slr1601 | G0:0051347 | <1e-4 | s110102 | G0:0042455 | <1e-4 | slr0613 | G0:0022836 | <1e-4 | slr0373 | G0:0000166 | 0.1822 |
| s111921 | G0:0050789 | <1e-4 | ssl1520 | G0:0009199 | <1e-4 | s110608 | G0:0008150 | <1e-4 | slr0483 | G0:0022857 | <1e-4 | s111352 | G0:0000166 | 0.1822 |
| s111319 | G0:0052111 | <1e-4 | s111906 | G0:0008150 | <1e-4 | slr0269 | G0:0080090 | <1e-4 | s110382 | G0:0015267 | <1e-4 | s110871 | G0:0000166 | 0.1822 |
| slr1394 | G0:0009057 | <1e-4 | s110410 | G0:0044003 | <1e-4 | s115067 | G0:0051188 | <1e-4 | s110319 | G0:0022832 | <1e-4 | s111350 | G0:0000166 | 0.1822 |
| slr0503 | G0:0048878 | <1e-4 | slr0217 | G0:0072527 | <1e-4 | ssr2755 | G0:0051716 | <1e-4 | s110737 | G0:0015077 | <1e-4 | s110359 | G0:0000166 | 0.1822 |
| slr0250 | G0:0009259 | <1e-4 | s110564 | G0:0044282 | <1e-4 | slr1188 | G0:0044275 | <1e-4 | slr2000 | G0:0060089 | <1e-4 | slr0104 | G0:0000166 | 0.1822 |
| slr0907 | G0:0034641 | <1e-4 | s110350 | G0:0044260 | <1e-4 | ssr2422 | G0:0071554 | <1e-4 | s117034 | G0:0022890 | <1e-4 | s110688 | G0:0000166 | 0.1822 |
| s115006 | G0:0051818 | <1e-4 | slr7023 | G0:0071554 | <1e-4 | s111634 | G0:0044275 | <1e-4 | s117065 | G0:0043167 | <1e-4 | slr0664 | G0:0000166 | 0.1822 |
| slr5102 | G0:0031640 | <1e-4 | s111511 | G0:0072522 | <1e-4 | slr5112 | G0:0034654 | <1e-4 | slr6080 | G0:0008171 | <1e-4 | s111950 | G0:0000166 | 0.1822 |
| slr1800 | G0:0048519 | <1e-4 | s111009 | G0:0008150 | <1e-4 | s111359 | G0:0043436 | <1e-4 | slr6088 | G0:0015075 | <1e-4 | s111390 | G0:0000166 | 0.1822 |
| s118040 | G0:0090304 | <1e-4 | s110982 | G0:0052188 | <1e-4 | s110172 | G0:0006066 | <1e-4 | slr0582 | G0:0022838 | <1e-4 | slr1690 | G0:0000166 | 0.1822 |
| slr2080 | G0:0046128 | <1e-4 | slr1809 | G0:0009117 | <1e-4 | s110641 | G0:0046164 | <1e-4 | s110793 | G0:0022892 | <1e-4 | slr0702 | G0:0000166 | 0.1822 |
| s111071 | G0:0009150 | <1e-4 | s110639 | G0:0060255 | <1e-4 | slr7080 | G0:0009059 | <1e-4 | slr0919 | G0:0016462 | <1e-4 | s111654 | G0:0000166 | 0.1822 |
| s110274 | G0:0042180 | <1e-4 | slr0870 | G0:0006811 | <1e-4 | slr1951 | G0:0006766 | <1e-4 | s110886 | G0:0016741 | <1e-4 | s111925 | G0:0000166 | 0.1822 |
| s110911 | G0:0050801 | <1e-4 | slr1206 | G0:0009892 | <1e-4 | s110359 | G0:0044283 | <1e-4 | slr0789 | G0:0022803 | <1e-4 | slr1128 | G0:0000166 | 0.1822 |
| slr2052 | G0:0022607 | <1e-4 | s111265 | G0:0009308 | <1e-4 | slr0708 | G0:0051171 | <1e-4 | s110180 | G0:0043167 | <1e-4 | s111956 | G0:0000166 | 0.1822 |
| slr1095 | G0:0009165 | <1e-4 | slr1194 | G0:0055086 | <1e-4 | s111942 | G0:0016054 | <1e-4 | s118001 | G0:0042623 | <1e-4 | slr0729 | G0:0000166 | 0.1822 |
| s110564 | G0:0051246 | <1e-4 | s111654 | G0:0006721 | <1e-4 | ssl1520 | G0:0006066 | <1e-4 | ssr3402 | G0:0015267 | <1e-4 | s111512 | G0:0000166 | 0.1822 |
| slr1681 | G0:0044281 | <1e-4 | s110007 | G0:0009132 | <1e-4 | ssr1155 | G0:0019752 | <1e-4 | slr1033 | G0:0015293 | <1e-4 | slr1940 | G0:0000166 | 0.1822 |
| slr1290 | G0:0072527 | <1e-4 | s110539 | G0:0044260 | <1e-4 | slr0712 | G0:0050789 | <1e-4 | slr6067 | G0:0022836 | <1e-4 | s110268 | G0:0000166 | 0.1822 |
| s112015 | G0:0072527 | <1e-4 | s110376 | G0:0006163 | <1e-4 | ssr2318 | G0:0033013 | <1e-4 | s111965 | G0:0043167 | <1e-4 | s111040 | G0:0000166 | 0.1822 |
| slr1206 | G0:0006811 | <1e-4 | slr0232 | G0:0051234 | <1e-4 | slr1194 | G0:0034641 | <1e-4 | s111340 | G0:0022891 | <1e-4 | s111399 | G0:0000166 | 0.1822 |
| slr1230 | G0:0052188 | <1e-4 | s111400 | G0:0043933 | <1e-4 | s110481 | G0:0009056 | <1e-4 | slr1163 | G0:0016817 | <1e-4 | s110981 | G0:0000166 | 0.1822 |
| s110780 | G0:0006720 | <1e-4 | s111130 | G0:0042455 | <1e-4 | s110846 | G0:0044260 | <1e-4 | s111766 | G0:0008171 | <1e-4 | s111272 | G0:0016491 | 0.1821 |
| s111142 | G0:0044003 | <1e-4 | slr1571 | G0:0048519 | <1e-4 | slr0731 | G0:0051171 | <1e-4 | slr1143 | G0:0008171 | <1e-4 | s110656 | G0:0016491 | 0.1821 |
| ssr1114 | G0:0044255 | <1e-4 | slr0479 | G0:0060255 | <1e-4 | s111123 | G0:0019637 | <1e-4 | s115028 | G0:0016817 | <1e-4 | slr0108 | G0:0016491 | 0.1821 |
| slr2025 | G0:0050789 | <1e-4 | slr1270 | G0:0009126 | <1e-4 | s110309 | G0:0071554 | <1e-4 | ssl3382 | G0:0016462 | <1e-4 | s111528 | G0:0016491 | 0.1821 |
| s115069 | G0:0006721 | <1e-4 | s111381 | G0:0048878 | <1e-4 | ssl2065 | G0:0043436 | <1e-4 | slr1813 | G0:0022803 | <1e-4 | s111477 | G0:0016491 | 0.1821 |
| s110496 | G0:0009142 | <1e-4 | s110749 | G0:0009059 | <1e-4 | s110982 | G0:0006631 | <1e-4 | slr0217 | G0:0022832 | <1e-4 | slr0871 | G0:0006810 | 0.1819 |
| slr0941 | G0:0019219 | <1e-4 | s110596 | G0:0009893 | <1e-4 | slr1273 | G0:0006721 | <1e-4 | s110749 | G0:0016818 | <1e-4 | slr1066 | G0:0006810 | 0.1819 |
| slr1865 | G0:0019752 | <1e-4 | s110925 | G0:0043933 | <1e-4 | ssl5027 | G0:0044283 | <1e-4 | s110296 | G0:0042623 | <1e-4 | s111433 | G0:0006810 | 0.1819 |
| s112015 | G0:0044271 | <1e-4 | slr0960 | G0:0019362 | <1e-4 | s110997 | G0:0044106 | <1e-4 | ssr0536 | G0:0015075 | <1e-4 | slr1866 | G0:0006810 | 0.1819 |
| slr7080 | G0:0051818 | <1e-4 | slr1534 | G0:0009126 | <1e-4 | slr0517 | G0:0043170 | <1e-4 | s112006 | G0:0015291 | <1e-4 | s110296 | G0:0006810 | 0.1819 |
| slr6065 | G0:0006066 | <1e-4 | ssr1041 | G0:0005996 | <1e-4 | slr0112 | G0:0043648 | <1e-4 | slr0092 | G0:0015405 | <1e-4 | slr1896 | G0:0006810 | 0.1819 |
| slr1142 | G0:0048522 | <1e-4 | slr0813 | G0:0046483 | <1e-4 | slr0104 | G0:0009987 | <1e-4 | ssl2971 | G0:0015399 | <1e-4 | slr1353 | G0:0006810 | 0.1819 |

|         |            |       |         |            |       |         |            |       |         |            |       |         |            |        |
|---------|------------|-------|---------|------------|-------|---------|------------|-------|---------|------------|-------|---------|------------|--------|
| sl10854 | G0:0065007 | <1e-4 | slr0480 | G0:0050794 | <1e-4 | slr1977 | G0:0060255 | <1e-4 | sl10008 | G0:0022890 | <1e-4 | sl10424 | G0:0006810 | 0.1819 |
| slr0551 | G0:0009144 | <1e-4 | ssl2717 | G0:0050801 | <1e-4 | sl11532 | G0:0051179 | <1e-4 | sl11835 | G0:0022832 | <1e-4 | sl11455 | G0:0006810 | 0.1819 |
| sl15067 | G0:0042180 | <1e-4 | sl11797 | G0:0009056 | <1e-4 | slr2120 | G0:0009056 | <1e-4 | slr1864 | G0:0022857 | <1e-4 | sl10274 | G0:0006810 | 0.1819 |
| sl11477 | G0:0043549 | <1e-4 | slr8022 | G0:0009124 | <1e-4 | slr6049 | G0:0050789 | <1e-4 | sl11240 | G0:0008171 | <1e-4 | slr0376 | G0:0006810 | 0.1819 |
| ssl1046 | G0:0044260 | <1e-4 | slr1287 | G0:0006811 | <1e-4 | ssl6035 | G0:0050789 | <1e-4 | slr0264 | G0:0060089 | <1e-4 | slr1917 | G0:0006810 | 0.1819 |
| slr5021 | G0:0009165 | <1e-4 | slr7026 | G0:0009892 | <1e-4 | sl11250 | G0:0006720 | <1e-4 | slr0723 | G0:0015075 | <1e-4 | slr0211 | G0:0006810 | 0.1819 |
| slr1813 | G0:0051716 | <1e-4 | slr0592 | G0:0009260 | <1e-4 | slr0654 | G0:0009165 | <1e-4 | sl17062 | G0:0022857 | <1e-4 | slr1391 | G0:0006810 | 0.1819 |
| slr0300 | G0:0065007 | <1e-4 | slr0496 | G0:0022607 | <1e-4 | sl10101 | G0:0009263 | <1e-4 | ssr2551 | G0:0015399 | <1e-4 | sl11218 | G0:0006810 | 0.1819 |
| slr1376 | G0:0072527 | <1e-4 | sl11239 | G0:0042455 | <1e-4 | ssl5099 | G0:0006091 | <1e-4 | slr1827 | G0:0005342 | <1e-4 | slr0243 | G0:0006810 | 0.1819 |
| sl11532 | G0:0009987 | <1e-4 | sl18035 | G0:0042451 | <1e-4 | sl11938 | G0:0009144 | <1e-4 | slr1079 | G0:0043492 | <1e-4 | sl11934 | G0:0006810 | 0.1819 |
| sl11239 | G0:0005996 | <1e-4 | slr5102 | G0:0009132 | <1e-4 | sl11925 | G0:0006066 | <1e-4 | sl11191 | G0:0022803 | <1e-4 | sl11426 | G0:0006810 | 0.1819 |
| sl10102 | G0:0009117 | <1e-4 | sl11775 | G0:0044282 | <1e-4 | sl10853 | G0:0048878 | <1e-4 | sl10172 | G0:0016462 | <1e-4 | sl11542 | G0:0006810 | 0.1819 |
| sl17050 | G0:0009124 | <1e-4 | slr1623 | G0:0051171 | <1e-4 | sl11773 | G0:0006220 | <1e-4 | slr0606 | G0:0042623 | <1e-4 | slr0876 | G0:0006810 | 0.1819 |
| slr7037 | G0:0071842 | <1e-4 | slr1852 | G0:0072524 | <1e-4 | slr0634 | G0:0009394 | <1e-4 | slr1628 | G0:0016462 | <1e-4 | slr1025 | G0:0006810 | 0.1819 |
| ssl2595 | G0:0046164 | <1e-4 | slr0645 | G0:0048519 | <1e-4 | slr6075 | G0:0048519 | <1e-4 | slr1023 | G0:0022890 | <1e-4 | sl11472 | G0:0006810 | 0.1819 |
| slr0456 | G0:0044003 | <1e-4 | ssr2802 | G0:0006766 | <1e-4 | slr0976 | G0:0008150 | <1e-4 | slr8044 | G0:0015399 | <1e-4 | sl10508 | G0:0006810 | 0.1819 |
| slr0816 | G0:0009165 | <1e-4 | sl11613 | G0:0016054 | <1e-4 | sl15063 | G0:0006163 | <1e-4 | sl10022 | G0:0022832 | <1e-4 | slr1222 | G0:0006810 | 0.1819 |
| slr7026 | G0:0006753 | <1e-4 | slr0241 | G0:0009308 | <1e-4 | ssl1792 | G0:0046394 | <1e-4 | slr1441 | G0:0016818 | <1e-4 | slr1612 | G0:0006810 | 0.1819 |
| sl18019 | G0:0052111 | <1e-4 | ssr2803 | G0:0018130 | <1e-4 | slr0400 | G0:0010556 | <1e-4 | slr1142 | G0:0015077 | <1e-4 | slr1127 | G0:0006810 | 0.1819 |
| sl18007 | G0:0006220 | <1e-4 | sl10585 | G0:0006766 | <1e-4 | slr1290 | G0:0009308 | <1e-4 | sl11307 | G0:0016746 | <1e-4 | slr0476 | G0:0006810 | 0.1819 |
| sl10909 | G0:0071554 | <1e-4 | slr0374 | G0:0006066 | <1e-4 | slr1619 | G0:0044260 | <1e-4 | slr0964 | G0:0016818 | <1e-4 | slr0480 | G0:0006810 | 0.1819 |
| sl11135 | G0:0010556 | <1e-4 | slr1613 | G0:0044260 | <1e-4 | slr0596 | G0:0072522 | <1e-4 | slr0373 | G0:0015075 | <1e-4 | slr1162 | G0:0016491 | 0.1818 |
| sl11571 | G0:0019362 | <1e-4 | sl11757 | G0:0009117 | <1e-4 | slr0975 | G0:0009260 | <1e-4 | sl10577 | G0:0015293 | <1e-4 | slr1188 | G0:0016491 | 0.1818 |
| slr6031 | G0:0009263 | <1e-4 | slr1681 | G0:0065007 | <1e-4 | sl10669 | G0:0052111 | <1e-4 | sl11174 | G0:0060089 | <1e-4 | sl10867 | G0:0016491 | 0.1818 |
| slr0431 | G0:0019222 | <1e-4 | ssr6003 | G0:0046164 | <1e-4 | slr1862 | G0:0006576 | <1e-4 | slr6100 | G0:0022832 | <1e-4 | slr7097 | G0:0016491 | 0.1818 |
| sl11738 | G0:0009144 | <1e-4 | sl10263 | G0:0042455 | <1e-4 | sl10785 | G0:0044275 | <1e-4 | sl10068 | G0:0060089 | <1e-4 | sl10803 | G0:0016491 | 0.1818 |
| slr6016 | G0:0005996 | <1e-4 | slr1339 | G0:0044003 | <1e-4 | slr1188 | G0:0090304 | <1e-4 | slr1062 | G0:0016746 | <1e-4 | sl10406 | G0:0016491 | 0.1818 |
| sl10147 | G0:0009893 | <1e-4 | ssl0461 | G0:0044283 | <1e-4 | slr0250 | G0:0043412 | <1e-4 | sl10314 | G0:0016462 | <1e-4 | slr7098 | G0:0016491 | 0.1818 |
| sl10742 | G0:0044281 | <1e-4 | slr6021 | G0:0043436 | <1e-4 | ssr6078 | G0:0006811 | <1e-4 | sl17067 | G0:0008171 | <1e-4 | slr7083 | G0:0016491 | 0.1818 |
| sl11411 | G0:0046128 | <1e-4 | sl10930 | G0:0048523 | <1e-4 | slr0468 | G0:0009144 | <1e-4 | slr0755 | G0:0016462 | <1e-4 | sl10293 | G0:0016491 | 0.1818 |
| sl11222 | G0:0052188 | <1e-4 | ssl5129 | G0:0060255 | <1e-4 | sl11761 | G0:0022607 | <1e-4 | sl11906 | G0:0022838 | <1e-4 | sl10886 | G0:0016491 | 0.1818 |
| sl10007 | G0:0050794 | <1e-4 | slr5119 | G0:0019637 | <1e-4 | sl10984 | G0:0045184 | <1e-4 | slr1407 | G0:0015405 | <1e-4 | ssr1407 | G0:0016491 | 0.1818 |
| slr7024 | G0:0052111 | <1e-4 | slr1690 | G0:0033013 | <1e-4 | sl11949 | G0:0080090 | <1e-4 | sl11095 | G0:0016746 | <1e-4 | sl10369 | G0:0016491 | 0.1818 |
| ssr1528 | G0:0008150 | <1e-4 | slr5018 | G0:0009132 | <1e-4 | slr5016 | G0:0071841 | <1e-4 | sl11025 | G0:0022838 | <1e-4 | slr0440 | G0:0016491 | 0.1818 |
| slr0065 | G0:0009057 | <1e-4 | sl11160 | G0:0051186 | <1e-4 | slr0848 | G0:0052188 | <1e-4 | slr0250 | G0:0015077 | <1e-4 | slr1363 | G0:0016491 | 0.1818 |
| slr1419 | G0:0051186 | <1e-4 | sl10381 | G0:0009161 | <1e-4 | sl11060 | G0:0006733 | <1e-4 | slr1084 | G0:0043167 | <1e-4 | ssl1464 | G0:0016491 | 0.1818 |
| sl11321 | G0:0048523 | <1e-4 | ssl1300 | G0:0046483 | <1e-4 | ssr1768 | G0:0043549 | <1e-4 | ssr6020 | G0:0022891 | <1e-4 | slr0145 | G0:0016491 | 0.1818 |
| sl11106 | G0:0009150 | <1e-4 | slr0959 | G0:0045184 | <1e-4 | sl10274 | G0:0006811 | <1e-4 | sl15047 | G0:0022836 | <1e-4 | sl11389 | G0:0016491 | 0.1818 |
| slr2012 | G0:0009893 | <1e-4 | slr1681 | G0:0033013 | <1e-4 | sl18019 | G0:0006733 | <1e-4 | sl10994 | G0:0022857 | <1e-4 | slr6008 | G0:0016491 | 0.1818 |
| slr1169 | G0:0008150 | <1e-4 | ssl8028 | G0:0080090 | <1e-4 | slr1241 | G0:0009150 | <1e-4 | slr1814 | G0:0022832 | <1e-4 | ssr2611 | G0:0016491 | 0.1818 |
| sl11884 | G0:0048522 | <1e-4 | sl10451 | G0:0031323 | <1e-4 | slr1603 | G0:0031323 | <1e-4 | slr1178 | G0:0016817 | <1e-4 | sl11939 | G0:0016491 | 0.1818 |
| sl10360 | G0:0051716 | <1e-4 | sl17028 | G0:0008150 | <1e-4 | slr2144 | G0:0050801 | <1e-4 | sl10162 | G0:0016818 | <1e-4 | ssl3379 | G0:0016491 | 0.1818 |
| sl10780 | G0:0072521 | <1e-4 | slr1230 | G0:0046128 | <1e-4 | sl11304 | G0:0044271 | <1e-4 | slr2144 | G0:0022891 | <1e-4 | sl10658 | G0:0016491 | 0.1818 |
| sl11315 | G0:0072524 | <1e-4 | sl10691 | G0:0010556 | <1e-4 | slr0967 | G0:0009394 | <1e-4 | sl10175 | G0:0015405 | <1e-4 | sl15032 | G0:0016491 | 0.1818 |
| slr1462 | G0:0043933 | <1e-4 | slr0695 | G0:0051188 | <1e-4 | sl11528 | G0:0010556 | <1e-4 | slr1188 | G0:0022832 | <1e-4 | sl11123 | G0:0016491 | 0.1818 |
| slr1815 | G0:0050794 | <1e-4 | slr2060 | G0:0050789 | <1e-4 | sl18002 | G0:0009987 | <1e-4 | slr0416 | G0:0022890 | <1e-4 | ssr2422 | G0:0016491 | 0.1818 |
| sl17055 | G0:0022607 | <1e-4 | sl10532 | G0:0019362 | <1e-4 | sl11552 | G0:0009889 | <1e-4 | sl10216 | G0:0022891 | <1e-4 | sl15061 | G0:0016491 | 0.1818 |
| slr0195 | G0:0031323 | <1e-4 | sl10691 | G0:0042455 | <1e-4 | sl11764 | G0:0055082 | <1e-4 | sl15003 | G0:0016818 | <1e-4 | ssr5020 | G0:0016491 | 0.1818 |
| sl11372 | G0:0031640 | <1e-4 | sl10297 | G0:0072527 | <1e-4 | slr1660 | G0:0042180 | <1e-4 | sl11131 | G0:0022857 | <1e-4 | sl15047 | G0:0016491 | 0.1818 |
| slr0192 | G0:0046483 | <1e-4 | slr5013 | G0:0019362 | <1e-4 | slr1188 | G0:0048523 | <1e-4 | slr0712 | G0:0015405 | <1e-4 | ssr5120 | G0:0016491 | 0.1818 |
| sl15130 | G0:0009059 | <1e-4 | ssr1041 | G0:0009150 | <1e-4 | slr1260 | G0:0044282 | <1e-4 | slr1471 | G0:0060089 | <1e-4 | sl11109 | G0:0016491 | 0.1818 |
| sl10394 | G0:0010556 | <1e-4 | sl15026 | G0:0010468 | <1e-4 | slr0305 | G0:0046907 | <1e-4 | slr7073 | G0:0022838 | <1e-4 | slr0890 | G0:0016491 | 0.1818 |
| ssr1499 | G0:0044282 | <1e-4 | slr1394 | G0:0055114 | <1e-4 | ssr6019 | G0:0051716 | <1e-4 | slr5118 | G0:0005342 | <1e-4 | sl10775 | G0:0016491 | 0.1818 |
| sl10981 | G0:0008150 | <1e-4 | sl10301 | G0:0009987 | <1e-4 | sl10691 | G0:0050896 | <1e-4 | sl17067 | G0:0022838 | <1e-4 | ssl5031 | G0:0016491 | 0.1818 |

|         |            |       |         |            |       |         |            |       |         |            |       |         |            |        |
|---------|------------|-------|---------|------------|-------|---------|------------|-------|---------|------------|-------|---------|------------|--------|
| sl10558 | G0:0034641 | <1e-4 | slr0695 | G0:0072522 | <1e-4 | ssr6099 | G0:0019219 | <1e-4 | slr6044 | G0:0042623 | <1e-4 | sl15026 | G0:0016491 | 0.1818 |
| slr0207 | G0:0006220 | <1e-4 | sl11174 | G0:0019222 | <1e-4 | ss11464 | G0:0006066 | <1e-4 | sl11505 | G0:0022836 | <1e-4 | slr0489 | G0:0016491 | 0.1818 |
| slr2119 | G0:0048522 | <1e-4 | slr1168 | G0:0009144 | <1e-4 | sl10414 | G0:0072522 | <1e-4 | slr1301 | G0:0015075 | <1e-4 | ss12420 | G0:0016491 | 0.1818 |
| sl10487 | G0:0048522 | <1e-4 | slr1603 | G0:0050789 | <1e-4 | slr1513 | G0:0072528 | <1e-4 | slr1699 | G0:0015399 | <1e-4 | sl11306 | G0:0016491 | 0.1818 |
| sl11060 | G0:0034660 | <1e-4 | slr7013 | G0:0016054 | <1e-4 | sl10181 | G0:0072524 | <1e-4 | ss10787 | G0:0016746 | <1e-4 | sl10167 | G0:0016491 | 0.1818 |
| ss10467 | G0:0042180 | <1e-4 | slr1778 | G0:0046164 | <1e-4 | slr2110 | G0:0019751 | <1e-4 | sl10685 | G0:0016817 | <1e-4 | slr7082 | G0:0016491 | 0.1818 |
| ssr3410 | G0:0019752 | <1e-4 | slr1275 | G0:0044260 | <1e-4 | slr1534 | G0:0072524 | <1e-4 | sl11752 | G0:0043492 | <1e-4 | slr2119 | G0:0016491 | 0.1818 |
| sl10298 | G0:0044260 | <1e-4 | sl11002 | G0:0009309 | <1e-4 | slr0345 | G0:0009165 | <1e-4 | sl17031 | G0:0016818 | <1e-4 | slr1384 | G0:0016491 | 0.1818 |
| ss17046 | G0:0008150 | <1e-4 | slr0053 | G0:0033013 | <1e-4 | slr1618 | G0:0044106 | <1e-4 | ss15103 | G0:0015293 | <1e-4 | slr7025 | G0:0016491 | 0.1818 |
| slr1222 | G0:0009991 | <1e-4 | slr0780 | G0:0080090 | <1e-4 | sl10939 | G0:0043412 | <1e-4 | sl17087 | G0:0016818 | <1e-4 | sl11203 | G0:0016491 | 0.1818 |
| sl10350 | G0:0043170 | <1e-4 | slr6068 | G0:0072522 | <1e-4 | slr0845 | G0:0051234 | <1e-4 | ssr2553 | G0:0022890 | <1e-4 | slr0870 | G0:0016491 | 0.1818 |
| slr6038 | G0:0009057 | <1e-4 | sl15026 | G0:0009117 | <1e-4 | sl10382 | G0:0018130 | <1e-4 | ss12471 | G0:0022892 | <1e-4 | ss12148 | G0:0016491 | 0.1818 |
| sl10072 | G0:0031323 | <1e-4 | sl11913 | G0:0006733 | <1e-4 | slr1301 | G0:0006811 | <1e-4 | slr1384 | G0:0043167 | <1e-4 | sl11378 | G0:0016491 | 0.1818 |
| slr2121 | G0:0009165 | <1e-4 | slr1462 | G0:0019219 | <1e-4 | sl11052 | G0:0044271 | <1e-4 | sl17034 | G0:0016818 | <1e-4 | slr0049 | G0:0016491 | 0.1818 |
| sl10996 | G0:0006766 | <1e-4 | sl11002 | G0:0010468 | <1e-4 | ssr0336 | G0:0009263 | <1e-4 | slr1546 | G0:0043492 | <1e-4 | slr0065 | G0:0016491 | 0.1818 |
| ss13549 | G0:0031640 | <1e-4 | sl11262 | G0:0009141 | <1e-4 | slr1098 | G0:0044260 | <1e-4 | slr1896 | G0:0022832 | <1e-4 | slr2105 | G0:0016491 | 0.1818 |
| sl10552 | G0:0006811 | <1e-4 | slr1303 | G0:0006066 | <1e-4 | slr1623 | G0:0050896 | <1e-4 | sl12013 | G0:0016818 | <1e-4 | sl10727 | G0:0016491 | 0.1818 |
| slr1913 | G0:0009124 | <1e-4 | slr0816 | G0:0043933 | <1e-4 | slr1235 | G0:0006082 | <1e-4 | slr1674 | G0:0022836 | <1e-4 | slr0146 | G0:0016491 | 0.1818 |
| slr2018 | G0:0043412 | <1e-4 | sl11562 | G0:0006091 | <1e-4 | slr1913 | G0:0016054 | <1e-4 | slr1612 | G0:0022803 | <1e-4 | sl10241 | G0:0016491 | 0.1818 |
| sl11939 | G0:0009987 | <1e-4 | ssr7017 | G0:0051716 | <1e-4 | sl10266 | G0:0006733 | <1e-4 | sl11613 | G0:0008171 | <1e-4 | slr1547 | G0:0016491 | 0.1818 |
| slr1865 | G0:0052111 | <1e-4 | ss17042 | G0:0034641 | <1e-4 | slr0341 | G0:0051186 | <1e-4 | ss11417 | G0:0015267 | <1e-4 | slr6049 | G0:0016491 | 0.1818 |
| slr1601 | G0:0009144 | <1e-4 | sl10802 | G0:0022411 | <1e-4 | slr1544 | G0:0046128 | <1e-4 | ss12064 | G0:0015399 | <1e-4 | slr1566 | G0:0016491 | 0.1818 |
| ssr2711 | G0:0006766 | <1e-4 | slr0104 | G0:0019637 | <1e-4 | ss15100 | G0:0009309 | <1e-4 | ss12807 | G0:0022892 | <1e-4 | slr6067 | G0:0016491 | 0.1818 |
| sl10181 | G0:0006753 | <1e-4 | slr1599 | G0:0006766 | <1e-4 | sl11009 | G0:0046164 | <1e-4 | sl10047 | G0:0043167 | <1e-4 | slr7011 | G0:0016491 | 0.1818 |
| slr1384 | G0:0033013 | <1e-4 | ssr6024 | G0:0048519 | <1e-4 | slr1394 | G0:0045184 | <1e-4 | sl11170 | G0:0022890 | <1e-4 | sl11571 | G0:0016491 | 0.1818 |
| slr0815 | G0:0051716 | <1e-4 | slr2003 | G0:0051716 | <1e-4 | slr0937 | G0:0044003 | <1e-4 | sl15006 | G0:0022857 | <1e-4 | sl11252 | G0:0016491 | 0.1818 |
| slr0551 | G0:0055082 | <1e-4 | slr0456 | G0:0010468 | <1e-4 | sl10265 | G0:0050896 | <1e-4 | sl11401 | G0:0022803 | <1e-4 | slr1600 | G0:0016491 | 0.1818 |
| sl10096 | G0:0071841 | <1e-4 | slr1261 | G0:0044260 | <1e-4 | ssr1552 | G0:0044281 | <1e-4 | sl15061 | G0:0022836 | <1e-4 | sl10423 | G0:0016491 | 0.1818 |
| slr0146 | G0:0046128 | <1e-4 | sl10875 | G0:0044260 | <1e-4 | sl11730 | G0:0044282 | <1e-4 | slr0975 | G0:0016746 | <1e-4 | slr1104 | G0:0016491 | 0.1818 |
| ssr2201 | G0:0072528 | <1e-4 | slr1450 | G0:0044255 | <1e-4 | sl10564 | G0:0055082 | <1e-4 | sl11109 | G0:0022838 | <1e-4 | ssr2317 | G0:0016491 | 0.1818 |
| ssr5092 | G0:0016053 | <1e-4 | sl11995 | G0:0006720 | <1e-4 | slr1339 | G0:0090304 | <1e-4 | ssr0109 | G0:0022836 | <1e-4 | sl11163 | G0:0016491 | 0.1818 |
| slr0913 | G0:0001932 | <1e-4 | slr6067 | G0:0071842 | <1e-4 | ss13383 | G0:0044271 | <1e-4 | sl10802 | G0:0015267 | <1e-4 | sl11884 | G0:0016491 | 0.1818 |
| slr0586 | G0:0042180 | <1e-4 | slr1788 | G0:0009893 | <1e-4 | slr1624 | G0:0048878 | <1e-4 | slr0689 | G0:0022832 | <1e-4 | sl11414 | G0:0016491 | 0.1818 |
| sl11749 | G0:0051716 | <1e-4 | slr2070 | G0:0046394 | <1e-4 | sl11751 | G0:0055082 | <1e-4 | slr0619 | G0:0015405 | <1e-4 | sl12015 | G0:0016491 | 0.1818 |
| sl15004 | G0:0009309 | <1e-4 | sl15006 | G0:0080090 | <1e-4 | ssr1766 | G0:0006766 | <1e-4 | slr0919 | G0:0015267 | <1e-4 | sl11217 | G0:0016491 | 0.1818 |
| sl10191 | G0:0072527 | <1e-4 | ssr5120 | G0:0009260 | <1e-4 | sl11659 | G0:0072521 | <1e-4 | sl10558 | G0:0016741 | <1e-4 | slr0695 | G0:0016491 | 0.1818 |
| ssr5019 | G0:0019637 | <1e-4 | sl11201 | G0:0046907 | <1e-4 | slr1753 | G0:0006066 | <1e-4 | slr0771 | G0:0003674 | <1e-4 | slr1261 | G0:0016491 | 0.1818 |
| ss10410 | G0:0019637 | <1e-4 | slr2111 | G0:0009056 | <1e-4 | sl11447 | G0:0009394 | <1e-4 | ssr7035 | G0:0022892 | <1e-4 | slr1956 | G0:0016491 | 0.1818 |
| sl10372 | G0:0072528 | <1e-4 | slr0455 | G0:0009889 | <1e-4 | slr1398 | G0:0005996 | <1e-4 | ss15007 | G0:0043492 | <1e-4 | slr0655 | G0:0016491 | 0.1818 |
| slr1174 | G0:0034654 | <1e-4 | slr0249 | G0:0016052 | <1e-4 | sl10858 | G0:0006066 | <1e-4 | ss11004 | G0:0015075 | <1e-4 | sl17062 | G0:0016491 | 0.1818 |
| slr1956 | G0:0044283 | <1e-4 | sl17028 | G0:0044260 | <1e-4 | slr7092 | G0:0016052 | <1e-4 | sl12015 | G0:0043492 | <1e-4 | sl10473 | G0:0016491 | 0.1818 |
| sl11995 | G0:0043549 | <1e-4 | slr1196 | G0:0051179 | <1e-4 | sl11401 | G0:0019362 | <1e-4 | sl16054 | G0:0043492 | <1e-4 | slr0505 | G0:0016491 | 0.1818 |
| sl11911 | G0:0043436 | <1e-4 | sl10446 | G0:0033013 | <1e-4 | sl11241 | G0:0031640 | <1e-4 | slr0588 | G0:0016746 | <1e-4 | sl11722 | G0:0016491 | 0.1818 |
| slr0313 | G0:0006753 | <1e-4 | ssr7093 | G0:0006066 | <1e-4 | sl15032 | G0:0006066 | <1e-4 | slr6016 | G0:0042623 | <1e-4 | sl11866 | G0:0016491 | 0.1818 |
| sl10072 | G0:0051347 | <1e-4 | sl15026 | G0:0019362 | <1e-4 | sl11381 | G0:0044271 | <1e-4 | sl10293 | G0:0015291 | <1e-4 | ssr0332 | G0:0016491 | 0.1818 |
| sl11528 | G0:0050794 | <1e-4 | slr8021 | G0:0048523 | <1e-4 | slr0232 | G0:0043549 | <1e-4 | slr0509 | G0:0042623 | <1e-4 | ss12245 | G0:0016491 | 0.1818 |
| slr1081 | G0:0006721 | <1e-4 | slr0092 | G0:0009059 | <1e-4 | ssr1499 | G0:0034660 | <1e-4 | sl17087 | G0:0060089 | <1e-4 | slr0388 | G0:0016491 | 0.1818 |
| slr1591 | G0:0019752 | <1e-4 | sl15004 | G0:0046128 | <1e-4 | slr1327 | G0:0019219 | <1e-4 | sl11911 | G0:0015291 | <1e-4 | sl15044 | G0:0016491 | 0.1818 |
| slr1619 | G0:0031326 | <1e-4 | ss12996 | G0:0006721 | <1e-4 | slr1365 | G0:0034641 | <1e-4 | sl11318 | G0:0003674 | <1e-4 | sl10419 | G0:0016491 | 0.1818 |
| slr1398 | G0:0009892 | <1e-4 | slr1900 | G0:0043412 | <1e-4 | slr1612 | G0:0050896 | <1e-4 | sl10410 | G0:0015075 | <1e-4 | slr5116 | G0:0016491 | 0.1818 |
| sl11880 | G0:0044248 | <1e-4 | slr1194 | G0:0031640 | <1e-4 | sl10071 | G0:0046394 | <1e-4 | sl10156 | G0:0008171 | <1e-4 | sl10443 | G0:0016491 | 0.1818 |
| sl10008 | G0:0048519 | <1e-4 | sl11926 | G0:0019752 | <1e-4 | ss12065 | G0:0006733 | <1e-4 | slr0408 | G0:0022836 | <1e-4 | slr1273 | G0:0016491 | 0.1818 |
| slr1259 | G0:0071496 | <1e-4 | slr6008 | G0:0072527 | <1e-4 | sl10761 | G0:0050801 | <1e-4 | slr5018 | G0:0022803 | <1e-4 | slr7101 | G0:0016491 | 0.1818 |
| slr1116 | G0:0072527 | <1e-4 | sl10208 | G0:0042455 | <1e-4 | sl10780 | G0:0006066 | <1e-4 | sl11638 | G0:0042623 | <1e-4 | slr1864 | G0:0016491 | 0.1818 |

|         |            |       |         |            |       |          |            |       |         |            |       |         |            |        |
|---------|------------|-------|---------|------------|-------|----------|------------|-------|---------|------------|-------|---------|------------|--------|
| slr0656 | G0:0051188 | <1e-4 | slr6016 | G0:0055086 | <1e-4 | ssr1258  | G0:0006066 | <1e-4 | slr0104 | G0:0022838 | <1e-4 | slr1306 | G0:0016491 | 0.1818 |
| sl10272 | G0:0016054 | <1e-4 | slr6106 | G0:0050801 | <1e-4 | sl10775  | G0:0090304 | <1e-4 | sl11160 | G0:0016741 | <1e-4 | slr7015 | G0:0016491 | 0.1818 |
| ssl7048 | G0:0071496 | <1e-4 | slr5127 | G0:0051246 | <1e-4 | slr0479  | G0:0065007 | <1e-4 | sl10994 | G0:0022832 | <1e-4 | slr6080 | G0:0016491 | 0.1818 |
| sl10253 | G0:0071554 | <1e-4 | slr6063 | G0:0008150 | <1e-4 | slr0815  | G0:0052188 | <1e-4 | slr1915 | G0:0015267 | <1e-4 | slr1195 | G0:0016491 | 0.1818 |
| slr0404 | G0:0072528 | <1e-4 | sl11613 | G0:0044255 | <1e-4 | ssr6099  | G0:0052111 | <1e-4 | sl12006 | G0:0015399 | <1e-4 | slr0569 | G0:0016491 | 0.1818 |
| slr1023 | G0:0048523 | <1e-4 | sl10007 | G0:0009308 | <1e-4 | sl10412  | G0:0044260 | <1e-4 | ssl2971 | G0:0003674 | <1e-4 | sl10985 | G0:0006810 | 0.1791 |
| slr2101 | G0:0006732 | <1e-4 | slr0108 | G0:0045184 | <1e-4 | ssl1004  | G0:0051716 | <1e-4 | sl11921 | G0:0016818 | <1e-4 | slr1964 | G0:0016491 | 0.1783 |
| ssl0832 | G0:0072522 | <1e-4 | sl15026 | G0:0009124 | <1e-4 | slr0479  | G0:0071841 | <1e-4 | sm10011 | G0:0060089 | <1e-4 | slr2011 | G0:0016491 | 0.1783 |
| sl10981 | G0:0044260 | <1e-4 | ssr6085 | G0:0051171 | <1e-4 | ssl8039  | G0:0009893 | <1e-4 | slr2012 | G0:0022836 | <1e-4 | slr1437 | G0:0016491 | 0.1783 |
| sl10355 | G0:0019751 | <1e-4 | slr6072 | G0:0051234 | <1e-4 | ssr5020  | G0:0010468 | <1e-4 | slr0642 | G0:0015405 | <1e-4 | slr0023 | G0:0016491 | 0.1783 |
| sl10590 | G0:0009144 | <1e-4 | slr7082 | G0:0022607 | <1e-4 | sl10175  | G0:0060255 | <1e-4 | slr0708 | G0:0015293 | <1e-4 | slr1854 | G0:0016491 | 0.1783 |
| slr7082 | G0:0080090 | <1e-4 | sl10994 | G0:0009144 | <1e-4 | ssr6027  | G0:0072527 | <1e-4 | sl15047 | G0:0015399 | <1e-4 | sl11656 | G0:0016491 | 0.1783 |
| ssr0332 | G0:0009123 | <1e-4 | slr2119 | G0:0044281 | <1e-4 | ssr7036  | G0:0050801 | <1e-4 | slr0709 | G0:0015293 | <1e-4 | sl11835 | G0:0016491 | 0.1783 |
| slr1951 | G0:0065007 | <1e-4 | slr0270 | G0:0009132 | <1e-4 | sl11272  | G0:0009150 | <1e-4 | sl11411 | G0:0015267 | <1e-4 | ssr2755 | G0:0016491 | 0.1783 |
| slr6013 | G0:0065007 | <1e-4 | slr0871 | G0:0051347 | <1e-4 | slr1767  | G0:0009124 | <1e-4 | slr0551 | G0:0043492 | <1e-4 | slr0392 | G0:0016491 | 0.1783 |
| sl10355 | G0:0060255 | <1e-4 | ssl0461 | G0:0006082 | <1e-4 | slr0318  | G0:0080090 | <1e-4 | slr1875 | G0:0016817 | <1e-4 | sl10314 | G0:0016491 | 0.1783 |
| slr1082 | G0:0050789 | <1e-4 | sl10350 | G0:0009126 | <1e-4 | slr1116  | G0:0009309 | <1e-4 | sl10875 | G0:0015077 | <1e-4 | sl10185 | G0:0016491 | 0.1783 |
| sl10547 | G0:0050789 | <1e-4 | slr1658 | G0:0043933 | <1e-4 | slr1767  | G0:0009394 | <1e-4 | ssr3571 | G0:0043167 | <1e-4 | sl10780 | G0:0016491 | 0.1783 |
| ssr7036 | G0:0006220 | <1e-4 | sl11531 | G0:0031640 | <1e-4 | sl10268  | G0:0010468 | <1e-4 | sl11934 | G0:0015291 | <1e-4 | slr0913 | G0:0016491 | 0.1783 |
| slr1600 | G0:0044106 | <1e-4 | slr0514 | G0:0048518 | <1e-4 | slr1827  | G0:0051246 | <1e-4 | sl17062 | G0:0022890 | <1e-4 | ssr3122 | G0:0016491 | 0.1783 |
| sl17050 | G0:0051179 | <1e-4 | slr0651 | G0:0050789 | <1e-4 | sl11834  | G0:0022607 | <1e-4 | sl10413 | G0:0022891 | <1e-4 | slr1573 | G0:0016491 | 0.1783 |
| sl10863 | G0:0009150 | <1e-4 | sl10498 | G0:0009308 | <1e-4 | sl10263  | G0:0008150 | <1e-4 | slr1534 | G0:0022890 | <1e-4 | slr1593 | G0:0016491 | 0.1783 |
| sl10732 | G0:0046164 | <1e-4 | slr0852 | G0:0043933 | <1e-4 | slr1752  | G0:0044275 | <1e-4 | slr0397 | G0:0022803 | <1e-4 | sl11315 | G0:0016491 | 0.1783 |
| sl15063 | G0:0034641 | <1e-4 | slr1644 | G0:0051716 | <1e-4 | sl10783  | G0:0090304 | <1e-4 | sl10827 | G0:0016817 | <1e-4 | slr0519 | G0:0016491 | 0.1783 |
| slr1152 | G0:0051171 | <1e-4 | slr0482 | G0:0009260 | <1e-4 | sl10630  | G0:0072521 | <1e-4 | slr0243 | G0:0015075 | <1e-4 | sl11949 | G0:0016491 | 0.1783 |
| sl12011 | G0:0051716 | <1e-4 | slr7012 | G0:0065007 | <1e-4 | sl11939  | G0:0065007 | <1e-4 | slr1384 | G0:0015075 | <1e-4 | sl10007 | G0:0016491 | 0.1783 |
| sl18033 | G0:0071842 | <1e-4 | slr1847 | G0:0044106 | <1e-4 | slr0670  | G0:0044003 | <1e-4 | sl11355 | G0:0005342 | <1e-4 | sl10524 | G0:0016491 | 0.1783 |
| slr0740 | G0:0006091 | <1e-4 | sl17067 | G0:0006811 | <1e-4 | sl10802  | G0:0044283 | <1e-4 | slr0890 | G0:0060089 | <1e-4 | sl11608 | G0:0016491 | 0.1783 |
| slr1353 | G0:0009987 | <1e-4 | sl10066 | G0:0006220 | <1e-4 | sl10283  | G0:0072524 | <1e-4 | ssl1520 | G0:0005342 | <1e-4 | sl10497 | G0:0016491 | 0.1783 |
| slr1263 | G0:0051234 | <1e-4 | ssr2754 | G0:0016054 | <1e-4 | slr1194  | G0:0055082 | <1e-4 | slr6106 | G0:0015293 | <1e-4 | ssr2439 | G0:0016491 | 0.1783 |
| slr2125 | G0:0006811 | <1e-4 | sl10451 | G0:0060255 | <1e-4 | slr0590  | G0:0071496 | <1e-4 | sl10996 | G0:0022890 | <1e-4 | slr0921 | G0:0016491 | 0.1783 |
| slr0692 | G0:0051171 | <1e-4 | slr0392 | G0:0071841 | <1e-4 | sl10293  | G0:0009262 | <1e-4 | sl11472 | G0:0015291 | <1e-4 | ssl0352 | G0:0016491 | 0.1783 |
| sl10478 | G0:0051188 | <1e-4 | slr1415 | G0:0006091 | <1e-4 | sl11054  | G0:0009132 | <1e-4 | slr0509 | G0:0043167 | <1e-4 | sl11006 | G0:0016491 | 0.1783 |
| slr1209 | G0:0072527 | <1e-4 | slr1186 | G0:0009987 | <1e-4 | sl10630  | G0:0009199 | <1e-4 | slr1104 | G0:0015291 | <1e-4 | slr1778 | G0:0016491 | 0.1783 |
| sl11233 | G0:0046394 | <1e-4 | slr0271 | G0:0050801 | <1e-4 | sl10269  | G0:0072528 | <1e-4 | ssr1558 | G0:0016817 | <1e-4 | sl10237 | G0:0016491 | 0.1783 |
| slr1773 | G0:0051179 | <1e-4 | slr2038 | G0:0044248 | <1e-4 | sl10085  | G0:0009309 | <1e-4 | slr0712 | G0:0015399 | <1e-4 | slr0941 | G0:0016491 | 0.1783 |
| slr5024 | G0:0006576 | <1e-4 | slr1383 | G0:0010468 | <1e-4 | ssl1552  | G0:0055114 | <1e-4 | sl10249 | G0:0016741 | <1e-4 | ssr2551 | G0:0016491 | 0.1783 |
| ssl2814 | G0:0006721 | <1e-4 | slr6033 | G0:0042451 | <1e-4 | slr1557  | G0:0009144 | <1e-4 | slr0241 | G0:0015267 | <1e-4 | ssl2807 | G0:0016491 | 0.1783 |
| slr1209 | G0:0022411 | <1e-4 | sl10102 | G0:0050794 | <1e-4 | slr0065  | G0:0044281 | <1e-4 | slr6033 | G0:0016818 | <1e-4 | sl11563 | G0:0016491 | 0.1783 |
| sl10930 | G0:0006720 | <1e-4 | slr0392 | G0:0080090 | <1e-4 | sl15034  | G0:0008150 | <1e-4 | slr1218 | G0:0016462 | <1e-4 | slr0482 | G0:0016491 | 0.1783 |
| slr6015 | G0:0019752 | <1e-4 | slr1128 | G0:0009141 | <1e-4 | slr0262  | G0:0016053 | <1e-4 | slr0285 | G0:0042623 | <1e-4 | slr0872 | G0:0016491 | 0.1783 |
| slr1618 | G0:0008610 | <1e-4 | slr0318 | G0:0033013 | <1e-4 | sl11262  | G0:0048522 | <1e-4 | sl11052 | G0:0022803 | <1e-4 | sl10606 | G0:0016491 | 0.1774 |
| ssr2998 | G0:0031640 | <1e-4 | sl10565 | G0:0044282 | <1e-4 | sl111400 | G0:0006793 | <1e-4 | slr1773 | G0:0016746 | <1e-4 | ssr1256 | G0:0016491 | 0.1774 |
| slr1932 | G0:0071554 | <1e-4 | slr0184 | G0:0009199 | <1e-4 | sl11025  | G0:0080090 | <1e-4 | slr1441 | G0:0003674 | <1e-4 | sl11912 | G0:0016491 | 0.1774 |
| sl11906 | G0:0006732 | <1e-4 | ssl3382 | G0:0009117 | <1e-4 | sl15109  | G0:0031326 | <1e-4 | slr0980 | G0:0022857 | <1e-4 | ssr2201 | G0:0016491 | 0.1774 |
| ssl6061 | G0:0008150 | <1e-4 | slr7102 | G0:0046128 | <1e-4 | slr8022  | G0:0042180 | <1e-4 | sl10670 | G0:0022803 | <1e-4 | slr2038 | G0:0016491 | 0.1774 |
| slr1593 | G0:0050801 | <1e-4 | slr1398 | G0:0071842 | <1e-4 | sl17062  | G0:0009263 | <1e-4 | slr6022 | G0:0043167 | <1e-4 | slr0980 | G0:0016491 | 0.1774 |
| ssr2843 | G0:0009056 | <1e-4 | sl10898 | G0:0044003 | <1e-4 | ssl0788  | G0:0051246 | <1e-4 | sl18011 | G0:0043167 | <1e-4 | ssr2781 | G0:0016491 | 0.1774 |
| slr0362 | G0:0046164 | <1e-4 | ssr3300 | G0:0045184 | <1e-4 | sl17047  | G0:0048878 | <1e-4 | sl11131 | G0:0016462 | <1e-4 | slr0317 | G0:0016491 | 0.1774 |
| slr7015 | G0:0006811 | <1e-4 | ssl2920 | G0:0060255 | <1e-4 | sl10175  | G0:0044281 | <1e-4 | sl10479 | G0:0042623 | <1e-4 | sl10071 | G0:0016491 | 0.1774 |
| sl11426 | G0:0009161 | <1e-4 | ssr1765 | G0:0009987 | <1e-4 | sl11024  | G0:0071841 | <1e-4 | slr1998 | G0:0060089 | <1e-4 | slr1495 | G0:0016491 | 0.1774 |
| sl10188 | G0:0016054 | <1e-4 | sl11583 | G0:0006753 | <1e-4 | sl10355  | G0:0071840 | <1e-4 | slr0590 | G0:0015405 | <1e-4 | sl10763 | G0:0016491 | 0.1774 |
| sl10553 | G0:0019752 | <1e-4 | slr0645 | G0:0001932 | <1e-4 | sl10436  | G0:0009893 | <1e-4 | slr1287 | G0:0015075 | <1e-4 | sl11186 | G0:0016491 | 0.1773 |
| slr0300 | G0:0050896 | <1e-4 | sl10585 | G0:0006082 | <1e-4 | slr0725  | G0:0044003 | <1e-4 | slr6004 | G0:0022836 | <1e-4 | slr0250 | G0:0016491 | 0.1773 |

|         |            |       |         |            |       |         |            |       |         |            |       |         |            |        |
|---------|------------|-------|---------|------------|-------|---------|------------|-------|---------|------------|-------|---------|------------|--------|
| slr1507 | G0:0008150 | <1e-4 | s110547 | G0:0009165 | <1e-4 | ss13379 | G0:0031326 | <1e-4 | s111252 | G0:0042623 | <1e-4 | slr1533 | G0:0016491 | 0.1773 |
| s111304 | G0:0051347 | <1e-4 | s111401 | G0:0009059 | <1e-4 | s110863 | G0:0050896 | <1e-4 | ssr2912 | G0:0043167 | <1e-4 | s111542 | G0:0016491 | 0.1773 |
| slr0989 | G0:0019752 | <1e-4 | slr7098 | G0:0072524 | <1e-4 | slr0168 | G0:0071496 | <1e-4 | slr2049 | G0:0005342 | <1e-4 | s111601 | G0:0016491 | 0.1773 |
| s111151 | G0:0009056 | <1e-4 | s110274 | G0:0006631 | <1e-4 | slr1591 | G0:0043549 | <1e-4 | slr0579 | G0:0016818 | <1e-4 | slr1194 | G0:0016491 | 0.1773 |
| slr1799 | G0:0009309 | <1e-4 | slr6100 | G0:0031640 | <1e-4 | s111526 | G0:0034654 | <1e-4 | s115097 | G0:0016817 | <1e-4 | s110864 | G0:0016491 | 0.1773 |
| slr0650 | G0:0009987 | <1e-4 | s110296 | G0:0071840 | <1e-4 | s110508 | G0:0071496 | <1e-4 | s111262 | G0:0016746 | <1e-4 | slr0545 | G0:0016491 | 0.1773 |
| slr1566 | G0:0001932 | <1e-4 | s111036 | G0:0016053 | <1e-4 | s110327 | G0:0009987 | <1e-4 | ss11464 | G0:0022838 | <1e-4 | slr1674 | G0:0016491 | 0.1773 |
| slr1572 | G0:0009308 | <1e-4 | slr0453 | G0:0043436 | <1e-4 | ssr2611 | G0:0042451 | <1e-4 | slr1170 | G0:0008171 | <1e-4 | s110499 | G0:0016491 | 0.1773 |
| s110860 | G0:0019362 | <1e-4 | slr1875 | G0:0043549 | <1e-4 | slr2110 | G0:0055114 | <1e-4 | s110933 | G0:0043169 | <1e-4 | ssr0536 | G0:0016491 | 0.1773 |
| s111400 | G0:0008150 | <1e-4 | slr5016 | G0:0005996 | <1e-4 | ss10738 | G0:0022607 | <1e-4 | ss10467 | G0:0005342 | <1e-4 | slr0876 | G0:0016491 | 0.1773 |
| slr0728 | G0:0019222 | <1e-4 | slr1600 | G0:0009132 | <1e-4 | s110547 | G0:0072524 | <1e-4 | s110608 | G0:0015291 | <1e-4 | s111247 | G0:0016491 | 0.1773 |
| slr7011 | G0:0009141 | <1e-4 | slr0948 | G0:0055114 | <1e-4 | s111939 | G0:0008610 | <1e-4 | slr6021 | G0:0015293 | <1e-4 | slr0937 | G0:0016491 | 0.1773 |
| slr0112 | G0:0051347 | <1e-4 | slr1152 | G0:0044106 | <1e-4 | slr1150 | G0:0031640 | <1e-4 | slr7013 | G0:0022803 | <1e-4 | s110274 | G0:0016491 | 0.1773 |
| ss15064 | G0:0044248 | <1e-4 | slr1780 | G0:0019751 | <1e-4 | slr1170 | G0:0019222 | <1e-4 | s110162 | G0:0022892 | <1e-4 | slr0423 | G0:0016491 | 0.1773 |
| slr1429 | G0:0042455 | <1e-4 | s110925 | G0:0044248 | <1e-4 | s117070 | G0:0022607 | <1e-4 | s111797 | G0:0015291 | <1e-4 | slr1023 | G0:0016491 | 0.1773 |
| slr1273 | G0:0010468 | <1e-4 | s110933 | G0:0006811 | <1e-4 | slr0023 | G0:0051347 | <1e-4 | ss18039 | G0:0016817 | <1e-4 | slr1376 | G0:0016491 | 0.1773 |
| ss10750 | G0:0033013 | <1e-4 | slr0888 | G0:0006732 | <1e-4 | ss15129 | G0:0016052 | <1e-4 | ss11378 | G0:0022890 | <1e-4 | slr1107 | G0:0016491 | 0.1773 |
| s111173 | G0:0043549 | <1e-4 | slr5037 | G0:0034641 | <1e-4 | s110266 | G0:0034654 | <1e-4 | s111239 | G0:0022803 | <1e-4 | slr1025 | G0:0016491 | 0.1773 |
| slr1188 | G0:0042180 | <1e-4 | slr1025 | G0:0008150 | <1e-4 | slr6031 | G0:0043412 | <1e-4 | ssr2843 | G0:0016817 | <1e-4 | s111455 | G0:0016491 | 0.1773 |
| s111765 | G0:0046907 | <1e-4 | s111714 | G0:0046394 | <1e-4 | ssr5074 | G0:0042451 | <1e-4 | s115006 | G0:0022832 | <1e-4 | s110296 | G0:0016491 | 0.1773 |
| s110756 | G0:0001932 | <1e-4 | slr7099 | G0:0009057 | <1e-4 | s111469 | G0:0044281 | <1e-4 | s111002 | G0:0015075 | <1e-4 | slr1353 | G0:0016491 | 0.1773 |
| s111132 | G0:0009263 | <1e-4 | slr1441 | G0:0050789 | <1e-4 | slr5013 | G0:0044106 | <1e-4 | slr1537 | G0:0003674 | <1e-4 | slr0157 | G0:0016491 | 0.1773 |
| s111040 | G0:0043648 | <1e-4 | s111071 | G0:0072524 | <1e-4 | s117050 | G0:0031323 | <1e-4 | s111830 | G0:0022890 | <1e-4 | slr1917 | G0:0016491 | 0.1773 |
| ss12064 | G0:0072524 | <1e-4 | slr0582 | G0:0016054 | <1e-4 | slr1363 | G0:0009260 | <1e-4 | slr5073 | G0:0016818 | <1e-4 | slr1557 | G0:0016491 | 0.1773 |
| slr1122 | G0:0071496 | <1e-4 | ssr2781 | G0:0006720 | <1e-4 | slr1098 | G0:0090304 | <1e-4 | slr0013 | G0:0005342 | <1e-4 | s110854 | G0:0016491 | 0.1773 |
| slr6075 | G0:0051171 | <1e-4 | slr0975 | G0:0009059 | <1e-4 | slr2049 | G0:0050794 | <1e-4 | slr0810 | G0:0043167 | <1e-4 | s111218 | G0:0016491 | 0.1773 |
| slr1547 | G0:0019752 | <1e-4 | slr2105 | G0:0006091 | <1e-4 | slr1415 | G0:0009123 | <1e-4 | slr6021 | G0:0016817 | <1e-4 | ss10109 | G0:0016491 | 0.1773 |
| s111950 | G0:0008150 | <1e-4 | ss15099 | G0:0006732 | <1e-4 | ssr1258 | G0:0009309 | <1e-4 | slr7026 | G0:0015291 | <1e-4 | slr0503 | G0:0016491 | 0.1773 |
| ssr2551 | G0:0042451 | <1e-4 | ssr5020 | G0:0006631 | <1e-4 | slr0606 | G0:0006811 | <1e-4 | s110444 | G0:0022803 | <1e-4 | slr1519 | G0:0016491 | 0.1773 |
| ss13383 | G0:0042455 | <1e-4 | slr0890 | G0:0044283 | <1e-4 | s111832 | G0:0065007 | <1e-4 | ssr7035 | G0:0043167 | <1e-4 | ssr3532 | G0:0016491 | 0.1773 |
| s110803 | G0:0009123 | <1e-4 | s111965 | G0:0006220 | <1e-4 | s110761 | G0:0051171 | <1e-4 | s111063 | G0:0015077 | <1e-4 | slr0076 | G0:0016491 | 0.1773 |
| s111715 | G0:0043170 | <1e-4 | slr6074 | G0:0051234 | <1e-4 | s111062 | G0:0052188 | <1e-4 | slr1600 | G0:0016818 | <1e-4 | s110263 | G0:0016491 | 0.1773 |
| s111570 | G0:0046128 | <1e-4 | ss15027 | G0:0052111 | <1e-4 | slr1657 | G0:0031326 | <1e-4 | s111714 | G0:0060089 | <1e-4 | ssr2843 | G0:0016491 | 0.1762 |
| s111632 | G0:0006732 | <1e-4 | s111660 | G0:0009309 | <1e-4 | s111630 | G0:0006793 | <1e-4 | slr0241 | G0:0022838 | <1e-4 | s111858 | G0:0016491 | 0.1762 |
| s110737 | G0:0005996 | <1e-4 | ssr0109 | G0:0006091 | <1e-4 | s111766 | G0:0048523 | <1e-4 | s111630 | G0:0016817 | <1e-4 | slr2092 | G0:0016491 | 0.1762 |
| slr0397 | G0:0006082 | <1e-4 | s110803 | G0:0019752 | <1e-4 | slr1275 | G0:0006631 | <1e-4 | slr1052 | G0:0015075 | <1e-4 | slr1603 | G0:0016491 | 0.1762 |
| ssr2972 | G0:0043412 | <1e-4 | slr0907 | G0:0005996 | <1e-4 | ss13383 | G0:0009124 | <1e-4 | slr1082 | G0:0022857 | <1e-4 | s111737 | G0:0016491 | 0.1762 |
| s110456 | G0:0043648 | <1e-4 | slr1436 | G0:0019362 | <1e-4 | slr1413 | G0:0090304 | <1e-4 | ss11378 | G0:0015399 | <1e-4 | slr0341 | G0:0016491 | 0.1762 |
| s110456 | G0:0072522 | <1e-4 | slr0217 | G0:0006631 | <1e-4 | slr7100 | G0:0009165 | <1e-4 | s115032 | G0:0005342 | <1e-4 | ss10353 | G0:0016491 | 0.1756 |
| ssr6048 | G0:0051716 | <1e-4 | slr1066 | G0:0072528 | <1e-4 | s112011 | G0:0009161 | <1e-4 | s117070 | G0:0022832 | <1e-4 | slr1851 | G0:0016491 | 0.1756 |
| slr0376 | G0:0006091 | <1e-4 | s111835 | G0:0031640 | <1e-4 | s111022 | G0:0071496 | <1e-4 | s110645 | G0:0016741 | <1e-4 | slr1767 | G0:0016491 | 0.1756 |
| s117067 | G0:0042180 | <1e-4 | s111736 | G0:0071496 | <1e-4 | s110503 | G0:0044271 | <1e-4 | ss15096 | G0:0022838 | <1e-4 | s110822 | G0:0016491 | 0.1756 |
| ssr2998 | G0:0072521 | <1e-4 | slr0810 | G0:0009142 | <1e-4 | ssr5106 | G0:0031640 | <1e-4 | slr0264 | G0:0022836 | <1e-4 | s111526 | G0:0016491 | 0.1756 |
| ssr5074 | G0:0043436 | <1e-4 | slr1188 | G0:0031640 | <1e-4 | slr1196 | G0:0031640 | <1e-4 | s110864 | G0:0016741 | <1e-4 | slr1726 | G0:0016491 | 0.1756 |
| slr1470 | G0:0072527 | <1e-4 | slr7083 | G0:0065007 | <1e-4 | s110156 | G0:0034660 | <1e-4 | s110301 | G0:0043492 | <1e-4 | s110910 | G0:0016491 | 0.1756 |
| s110639 | G0:0009057 | <1e-4 | slr1591 | G0:0050794 | <1e-4 | ssr2439 | G0:0051716 | <1e-4 | s111400 | G0:0022857 | <1e-4 | slr0594 | G0:0016491 | 0.1756 |
| ss12245 | G0:0046164 | <1e-4 | s110022 | G0:0043549 | <1e-4 | slr0514 | G0:0006631 | <1e-4 | s115006 | G0:0015267 | <1e-4 | s110022 | G0:0016491 | 0.1756 |
| s111691 | G0:0065007 | <1e-4 | slr1927 | G0:0019222 | <1e-4 | slr0482 | G0:0048522 | <1e-4 | slr0503 | G0:0022857 | <1e-4 | slr0589 | G0:0016491 | 0.1756 |
| s110156 | G0:0031326 | <1e-4 | slr1484 | G0:0006082 | <1e-4 | s111218 | G0:0080090 | <1e-4 | slr7098 | G0:0043167 | <1e-4 | ss12996 | G0:0016491 | 0.1756 |
| slr7012 | G0:0009987 | <1e-4 | slr0731 | G0:0051347 | <1e-4 | s111906 | G0:0044283 | <1e-4 | slr2092 | G0:0015405 | <1e-4 | slr0263 | G0:0016491 | 0.1756 |
| ss15015 | G0:0019637 | <1e-4 | slr0241 | G0:0022607 | <1e-4 | slr1906 | G0:0006631 | <1e-4 | slr6063 | G0:0022892 | <1e-4 | s110788 | G0:0016491 | 0.1756 |
| slr0272 | G0:0016054 | <1e-4 | slr0431 | G0:0006720 | <1e-4 | slr2048 | G0:0034654 | <1e-4 | s111186 | G0:0060089 | <1e-4 | slr0740 | G0:0016491 | 0.1756 |
| s111318 | G0:0044260 | <1e-4 | slr1101 | G0:0006811 | <1e-4 | slr6012 | G0:0072527 | <1e-4 | s111486 | G0:0005342 | <1e-4 | s111562 | G0:0016491 | 0.1756 |
| slr6029 | G0:0006733 | <1e-4 | ssr1528 | G0:0044255 | <1e-4 | s110611 | G0:0044255 | <1e-4 | s111509 | G0:0015291 | <1e-4 | s110325 | G0:0000166 | 0.1715 |



|          |            |       |          |            |       |          |            |       |          |            |       |          |            |        |
|----------|------------|-------|----------|------------|-------|----------|------------|-------|----------|------------|-------|----------|------------|--------|
| ssr7072  | G0:0051171 | <1e-4 | ssl0242  | G0:0009987 | <1e-4 | ssl2069  | G0:0019362 | <1e-4 | slr1913  | G0:0016818 | <1e-4 | slr0386  | G0:0000166 | 0.1715 |
| slr0199  | G0:0009144 | <1e-4 | sll1160  | G0:0080090 | <1e-4 | sll10478 | G0:0019222 | <1e-4 | slr0885  | G0:0015267 | <1e-4 | slr0431  | G0:0000166 | 0.1715 |
| sll1225  | G0:0008150 | <1e-4 | slr0581  | G0:0009124 | <1e-4 | sll11761 | G0:0009889 | <1e-4 | sll10412 | G0:0015293 | <1e-4 | sll10198 | G0:0000166 | 0.1715 |
| slr6021  | G0:0072528 | <1e-4 | sll11464 | G0:0010556 | <1e-4 | slr0670  | G0:0009142 | <1e-4 | slr0151  | G0:0022857 | <1e-4 | slr0364  | G0:0000166 | 0.1715 |
| slr0169  | G0:0044283 | <1e-4 | slr5126  | G0:0055082 | <1e-4 | sll11763 | G0:0031326 | <1e-4 | sll10103 | G0:0022838 | <1e-4 | slr0392  | G0:0000166 | 0.1715 |
| sll10242 | G0:0009150 | <1e-4 | slr5018  | G0:0071841 | <1e-4 | sll10167 | G0:0009259 | <1e-4 | slr1851  | G0:0003674 | <1e-4 | slr2122  | G0:0000166 | 0.1715 |
| ssr6024  | G0:0016053 | <1e-4 | slr0317  | G0:0006163 | <1e-4 | slr1603  | G0:0043436 | <1e-4 | sll11830 | G0:0016746 | <1e-4 | slr1964  | G0:0000166 | 0.1715 |
| slr1612  | G0:0071840 | <1e-4 | ssr5019  | G0:0048522 | <1e-4 | slr0287  | G0:0042451 | <1e-4 | sll18004 | G0:0015291 | <1e-4 | sll10010 | G0:0000166 | 0.1715 |
| ssr3570  | G0:0051246 | <1e-4 | ssr2711  | G0:0009126 | <1e-4 | slr0013  | G0:0006163 | <1e-4 | ssl1046  | G0:0016817 | <1e-4 | slr0941  | G0:0000166 | 0.1715 |
| ssr2615  | G0:0006066 | <1e-4 | sll11390 | G0:0009059 | <1e-4 | sll10871 | G0:0009893 | <1e-4 | slr1122  | G0:0022803 | <1e-4 | slr0845  | G0:0000166 | 0.1715 |
| slr1507  | G0:0072521 | <1e-4 | slr0613  | G0:0043412 | <1e-4 | slr6074  | G0:0008150 | <1e-4 | ssl1263  | G0:0043492 | <1e-4 | slr1084  | G0:0000166 | 0.1715 |
| sll11166 | G0:0009150 | <1e-4 | sll11359 | G0:0019752 | <1e-4 | sll17062 | G0:0072521 | <1e-4 | sll10252 | G0:0022890 | <1e-4 | slr1210  | G0:0000166 | 0.1715 |
| slr1907  | G0:0019219 | <1e-4 | sll11601 | G0:0008610 | <1e-4 | sll11348 | G0:0044275 | <1e-4 | slr6039  | G0:0022857 | <1e-4 | ssl10352 | G0:0000166 | 0.1715 |
| slr1259  | G0:0043412 | <1e-4 | slr1053  | G0:0043933 | <1e-4 | slr0609  | G0:0051188 | <1e-4 | slr1081  | G0:0022892 | <1e-4 | slr1593  | G0:0000166 | 0.1715 |
| sll10822 | G0:0006753 | <1e-4 | slr2105  | G0:0072528 | <1e-4 | slr1087  | G0:0046164 | <1e-4 | slr1547  | G0:0016462 | <1e-4 | sll10456 | G0:0000166 | 0.1715 |
| sll10827 | G0:0071842 | <1e-4 | sll11192 | G0:0050801 | <1e-4 | sll11289 | G0:0019751 | <1e-4 | slr1533  | G0:0015291 | <1e-4 | slr1932  | G0:0000166 | 0.1715 |
| ssl0467  | G0:0009262 | <1e-4 | slr1852  | G0:0051171 | <1e-4 | slr1611  | G0:0033013 | <1e-4 | sll11651 | G0:0022892 | <1e-4 | sll11658 | G0:0000166 | 0.1715 |
| slr0013  | G0:0046483 | <1e-4 | ssl2245  | G0:0051716 | <1e-4 | slr0313  | G0:0006732 | <1e-4 | sll11912 | G0:0060089 | <1e-4 | slr0872  | G0:0000166 | 0.1715 |
| slr1927  | G0:0006091 | <1e-4 | sll10804 | G0:0009056 | <1e-4 | slr1862  | G0:0031323 | <1e-4 | sll10181 | G0:0003674 | <1e-4 | sll10007 | G0:0000166 | 0.1715 |
| sll11464 | G0:0009124 | <1e-4 | slr0730  | G0:0051171 | <1e-4 | ssl7048  | G0:0009259 | <1e-4 | sll10497 | G0:0008171 | <1e-4 | slr1437  | G0:0000166 | 0.1715 |
| sll11021 | G0:0046483 | <1e-4 | slr2012  | G0:0006091 | <1e-4 | slr6088  | G0:0044260 | <1e-4 | slr0333  | G0:0003674 | <1e-4 | slr0144  | G0:0000166 | 0.1715 |
| sll10539 | G0:0009059 | <1e-4 | sll10925 | G0:0009150 | <1e-4 | ssr5074  | G0:0006732 | <1e-4 | sll10837 | G0:0015075 | <1e-4 | slr0519  | G0:0000166 | 0.1715 |
| slr0959  | G0:0022411 | <1e-4 | slr0313  | G0:0009987 | <1e-4 | ssr5011  | G0:0009132 | <1e-4 | slr1619  | G0:0043492 | <1e-4 | sll11061 | G0:0000166 | 0.1715 |
| sll10335 | G0:0051186 | <1e-4 | ssr0759  | G0:0009059 | <1e-4 | slr1906  | G0:0006720 | <1e-4 | slr5023  | G0:0022832 | <1e-4 | slr1571  | G0:0000166 | 0.1715 |
| ssr2848  | G0:0044003 | <1e-4 | slr1788  | G0:0016052 | <1e-4 | ssl1300  | G0:0019752 | <1e-4 | sll11119 | G0:0016746 | <1e-4 | slr1073  | G0:0000166 | 0.1715 |
| slr7081  | G0:0052111 | <1e-4 | slr0941  | G0:0090304 | <1e-4 | slr1940  | G0:0072528 | <1e-4 | sll10335 | G0:0043167 | <1e-4 | sll10381 | G0:0000166 | 0.1715 |
| slr0816  | G0:0016054 | <1e-4 | ssl2384  | G0:0051246 | <1e-4 | slr1659  | G0:0051171 | <1e-4 | sll10101 | G0:0022832 | <1e-4 | sll10355 | G0:0000166 | 0.1715 |
| slr1863  | G0:0044248 | <1e-4 | slr0039  | G0:0071841 | <1e-4 | slr1998  | G0:0048522 | <1e-4 | ssr2049  | G0:0022891 | <1e-4 | slr1572  | G0:0000166 | 0.1715 |
| sll10508 | G0:0055086 | <1e-4 | slr0769  | G0:0042451 | <1e-4 | sll11193 | G0:0009309 | <1e-4 | slr1752  | G0:0015267 | <1e-4 | slr0360  | G0:0000166 | 0.1715 |
| slr0364  | G0:0010556 | <1e-4 | sll17087 | G0:0009144 | <1e-4 | slr1566  | G0:0043933 | <1e-4 | sll11389 | G0:0016741 | <1e-4 | slr2073  | G0:0000166 | 0.1715 |
| slr6075  | G0:0065007 | <1e-4 | sll10069 | G0:0044260 | <1e-4 | slr1790  | G0:0019752 | <1e-4 | sll11400 | G0:0015399 | <1e-4 | slr0023  | G0:0000166 | 0.1715 |
| ssr1425  | G0:0006793 | <1e-4 | sll11068 | G0:0072521 | <1e-4 | sll10513 | G0:0009991 | <1e-4 | slr1601  | G0:0016746 | <1e-4 | slr1618  | G0:0000166 | 0.1715 |
| ssl5031  | G0:0009144 | <1e-4 | sll18007 | G0:0042180 | <1e-4 | slr1648  | G0:0043436 | <1e-4 | sll11511 | G0:0015267 | <1e-4 | slr1644  | G0:0016491 | 0.1695 |
| ssl7046  | G0:0006066 | <1e-4 | slr0712  | G0:0046483 | <1e-4 | slr0145  | G0:0009165 | <1e-4 | sll10623 | G0:0022857 | <1e-4 | ssr2142  | G0:0016491 | 0.1695 |
| slr0729  | G0:0046164 | <1e-4 | slr6051  | G0:0051186 | <1e-4 | ssl8005  | G0:0019751 | <1e-4 | sll11911 | G0:0022838 | <1e-4 | slr1431  | G0:0016491 | 0.1695 |
| slr7025  | G0:0046907 | <1e-4 | sll11241 | G0:0008610 | <1e-4 | slr0645  | G0:0009059 | <1e-4 | slr0318  | G0:0015399 | <1e-4 | sll10933 | G0:0006810 | 0.1692 |
| sll11401 | G0:0006163 | <1e-4 | ssr6027  | G0:0006631 | <1e-4 | sll10661 | G0:0005996 | <1e-4 | sll11608 | G0:0015399 | <1e-4 | sll10445 | G0:0016491 | 0.1685 |
| slr1576  | G0:0006091 | <1e-4 | slr5112  | G0:0034641 | <1e-4 | sll10839 | G0:0043436 | <1e-4 | slr1023  | G0:0016462 | <1e-4 | sll10242 | G0:0016491 | 0.164  |
| ssl18039 | G0:0016054 | <1e-4 | slr0238  | G0:0009165 | <1e-4 | slr0341  | G0:0006082 | <1e-4 | sll15097 | G0:0016741 | <1e-4 | sll10933 | G0:0016491 | 0.164  |
| sll18012 | G0:0048519 | <1e-4 | slr0845  | G0:0009987 | <1e-4 | sll15028 | G0:0052188 | <1e-4 | ssl5007  | G0:0005342 | <1e-4 | slr1918  | G0:0000166 | 0.1598 |
| ssr6026  | G0:0010468 | <1e-4 | ssr3572  | G0:0010468 | <1e-4 | sll11586 | G0:0045184 | <1e-4 | sll10103 | G0:0016817 | <1e-4 | sll11426 | G0:0000166 | 0.1598 |
| sll1289  | G0:0072528 | <1e-4 | slr0810  | G0:0009987 | <1e-4 | slr2032  | G0:0072527 | <1e-4 | ssr0336  | G0:0043492 | <1e-4 | slr1533  | G0:0000166 | 0.1598 |
| sll10243 | G0:0043436 | <1e-4 | sll12006 | G0:0046164 | <1e-4 | slr1168  | G0:0043549 | <1e-4 | slr1438  | G0:0060089 | <1e-4 | slr2025  | G0:0000166 | 0.1598 |
| sll11142 | G0:0006066 | <1e-4 | sll16053 | G0:0071842 | <1e-4 | sll11272 | G0:0071554 | <1e-4 | ssr3300  | G0:0022892 | <1e-4 | slr1659  | G0:0000166 | 0.1598 |
| slr0505  | G0:0051234 | <1e-4 | slr0845  | G0:0006576 | <1e-4 | ssl7038  | G0:0006733 | <1e-4 | slr0914  | G0:0022857 | <1e-4 | sll10283 | G0:0000166 | 0.1598 |
| sll1252  | G0:0009142 | <1e-4 | sll10496 | G0:0042451 | <1e-4 | slr1342  | G0:0042180 | <1e-4 | slr1762  | G0:0008171 | <1e-4 | sll10615 | G0:0000166 | 0.1598 |
| slr1053  | G0:0090304 | <1e-4 | ssl0242  | G0:0044282 | <1e-4 | ssr2972  | G0:0006793 | <1e-4 | slr1210  | G0:0008171 | <1e-4 | sll10301 | G0:0000166 | 0.1598 |
| sll10284 | G0:0034654 | <1e-4 | sll12013 | G0:0050801 | <1e-4 | sll11832 | G0:0006793 | <1e-4 | slr0872  | G0:0022890 | <1e-4 | sll10499 | G0:0000166 | 0.1598 |
| slr1114  | G0:0009893 | <1e-4 | slr1023  | G0:0044260 | <1e-4 | slr0654  | G0:0071496 | <1e-4 | slr0596  | G0:0022857 | <1e-4 | slr1896  | G0:0000166 | 0.1598 |
| sll1251  | G0:0009056 | <1e-4 | sll11884 | G0:0042455 | <1e-4 | slr0287  | G0:0080090 | <1e-4 | slr0146  | G0:0016741 | <1e-4 | sll10508 | G0:0000166 | 0.1598 |
| sll11730 | G0:0046907 | <1e-4 | sll11433 | G0:0009987 | <1e-4 | sll11749 | G0:0009150 | <1e-4 | sll11390 | G0:0015077 | <1e-4 | slr0551  | G0:0000166 | 0.1598 |
| slr1468  | G0:0009142 | <1e-4 | slr1681  | G0:0072528 | <1e-4 | slr1611  | G0:0034641 | <1e-4 | sll10802 | G0:0015293 | <1e-4 | slr0852  | G0:0000166 | 0.1598 |
| ssl3382  | G0:0055086 | <1e-4 | sll10783 | G0:0019752 | <1e-4 | sll10423 | G0:0071554 | <1e-4 | slr1122  | G0:0016818 | <1e-4 | sll10148 | G0:0000166 | 0.1598 |
| ssl2138  | G0:0046907 | <1e-4 | ssl7045  | G0:0034654 | <1e-4 | slr0496  | G0:0051234 | <1e-4 | ssr2711  | G0:0015291 | <1e-4 | sll10274 | G0:0000166 | 0.1598 |

ssr2755 G0:0043436 <1e-4 s110861 G0:0009987 <1e-4 s111476 G0:0072521 <1e-4 ssr1041 G0:0022832 <1e-4 ssr1375 G0:0000166 0.1598  
ssr3154 G0:0071496 <1e-4 s111025 G0:0009141 <1e-4 slr0912 G0:0048523 <1e-4 slr0169 G0:0016462 <1e-4 s111318 G0:0000166 0.1598  
slr0948 G0:0034654 <1e-4 s110068 G0:0009987 <1e-4 s117034 G0:0006631 <1e-4 slr0232 G0:0015267 <1e-4 slr1612 G0:0000166 0.1598  
slr0980 G0:0006766 <1e-4 slr0605 G0:0048522 <1e-4 slr0912 G0:0009144 <1e-4 slr0976 G0:0022832 <1e-4 s111433 G0:0000166 0.1598  
slr1260 G0:0006811 <1e-4 s115132 G0:0051171 <1e-4 ssr6085 G0:0044283 <1e-4 s110656 G0:0022836 <1e-4 ssr3532 G0:0000166 0.1598  
slr0575 G0:0006066 <1e-4 slr1258 G0:0044106 <1e-4 ss15025 G0:0031323 <1e-4 slr2119 G0:0016741 <1e-4 slr1107 G0:0000166 0.1598  
s110024 G0:0009117 <1e-4 slr1668 G0:0044271 <1e-4 slr6033 G0:0050794 <1e-4 slr1767 G0:0060089 <1e-4 slr1196 G0:0000166 0.1598  
s111611 G0:0009150 <1e-4 s110314 G0:0034654 <1e-4 s111858 G0:0006766 <1e-4 slr0172 G0:0022838 <1e-4 slr1023 G0:0000166 0.1598  
ssr7035 G0:0016053 <1e-4 slr6009 G0:0055086 <1e-4 s111680 G0:0065007 <1e-4 s110863 G0:0043492 <1e-4 slr1066 G0:0000166 0.1598  
ssr7036 G0:0048518 <1e-4 slr1262 G0:0034641 <1e-4 s117050 G0:0055082 <1e-4 slr1599 G0:0022832 <1e-4 s111219 G0:0000166 0.1598  
slr0821 G0:0009889 <1e-4 slr1339 G0:0016053 <1e-4 s111939 G0:0009144 <1e-4 slr0318 G0:0022890 <1e-4 slr1799 G0:0000166 0.1598  
s117050 G0:0009893 <1e-4 s110068 G0:0048523 <1e-4 slr5077 G0:0072522 <1e-4 slr1365 G0:0022803 <1e-4 slr1222 G0:0000166 0.1598  
s111630 G0:0052111 <1e-4 slr1275 G0:0050896 <1e-4 slr1864 G0:0044282 <1e-4 slr0059 G0:0016741 <1e-4 s111455 G0:0000166 0.1598  
slr0695 G0:0044271 <1e-4 s110274 G0:0031323 <1e-4 slr1911 G0:0009259 <1e-4 slr2032 G0:0022836 <1e-4 slr1471 G0:0016491 0.1575  
slr0272 G0:0009262 <1e-4 s110216 G0:0006066 <1e-4 slr0273 G0:0010468 <1e-4 s110319 G0:0022891 <1e-4 slr6031 G0:0000166 0.157  
ssr2998 G0:0009059 <1e-4 s110296 G0:0006720 <1e-4 s118019 G0:0080090 <1e-4 ssr3572 G0:0022891 <1e-4 s117062 G0:0000166 0.157  
s110867 G0:0046907 <1e-4 s111155 G0:0072521 <1e-4 slr7100 G0:0060255 <1e-4 s110875 G0:0015267 <1e-4 slr1484 G0:0000166 0.157  
slr1070 G0:0008150 <1e-4 slr1407 G0:0045184 <1e-4 slr0366 G0:0051171 <1e-4 slr1699 G0:0022836 <1e-4 slr1187 G0:0000166 0.157  
slr0887 G0:0009308 <1e-4 ssr0332 G0:0006631 <1e-4 slr2010 G0:0060255 <1e-4 s110811 G0:0043492 <1e-4 s110369 G0:0000166 0.157  
slr1173 G0:0044283 <1e-4 slr1999 G0:0009991 <1e-4 slr0318 G0:0052111 <1e-4 s110216 G0:0022838 <1e-4 s117043 G0:0000166 0.157  
slr1470 G0:0051818 <1e-4 s110448 G0:0009150 <1e-4 s111163 G0:0048522 <1e-4 ss12420 G0:0022857 <1e-4 s115033 G0:0000166 0.157  
s110997 G0:0019222 <1e-4 s111024 G0:0009165 <1e-4 ssr6030 G0:0009123 <1e-4 s110742 G0:0022803 <1e-4 s112015 G0:0000166 0.157  
slr7094 G0:0009260 <1e-4 slr0408 G0:0044260 <1e-4 slr6012 G0:0044248 <1e-4 slr1471 G0:0022832 <1e-4 s111401 G0:0000166 0.157  
s110496 G0:0006811 <1e-4 s110788 G0:0031326 <1e-4 s111979 G0:0009991 <1e-4 s111022 G0:0016746 <1e-4 slr0059 G0:0000166 0.157  
slr0168 G0:0051171 <1e-4 s111915 G0:0044283 <1e-4 s111166 G0:0019362 <1e-4 slr1210 G0:0015075 <1e-4 s111906 G0:0000166 0.157  
slr2092 G0:0046907 <1e-4 slr0300 G0:0044255 <1e-4 slr6074 G0:0009259 <1e-4 slr1474 G0:0015399 <1e-4 slr7059 G0:0000166 0.157  
s111736 G0:0016053 <1e-4 slr1812 G0:0033013 <1e-4 slr6100 G0:0044106 <1e-4 s110048 G0:0015293 <1e-4 slr1116 G0:0000166 0.157  
s111915 G0:0009165 <1e-4 s110577 G0:0019219 <1e-4 s110102 G0:0072527 <1e-4 slr1600 G0:0060089 <1e-4 ss15098 G0:0000166 0.157  
slr1676 G0:0009150 <1e-4 slr0386 G0:0072524 <1e-4 slr1034 G0:0051171 <1e-4 s111218 G0:0022836 <1e-4 slr1378 G0:0000166 0.157  
s111726 G0:0009889 <1e-4 slr1152 G0:0060255 <1e-4 s110162 G0:0009987 <1e-4 slr1951 G0:0015293 <1e-4 ss13383 G0:0000166 0.157  
slr1774 G0:0034654 <1e-4 slr1601 G0:0001932 <1e-4 slr0692 G0:0009260 <1e-4 s111106 G0:0016818 <1e-4 s111389 G0:0000166 0.157  
ss11464 G0:0060255 <1e-4 ss15091 G0:0043436 <1e-4 slr1073 G0:0043412 <1e-4 slr1425 G0:0016741 <1e-4 s111961 G0:0000166 0.157  
slr1087 G0:0043412 <1e-4 s110743 G0:0031640 <1e-4 slr1990 G0:0009161 <1e-4 s111170 G0:0016818 <1e-4 slr6064 G0:0000166 0.157  
s110932 G0:0050896 <1e-4 s111086 G0:0031326 <1e-4 s111252 G0:0016053 <1e-4 ssr2787 G0:0022891 <1e-4 slr1619 G0:0000166 0.157  
s111715 G0:0006576 <1e-4 slr1110 G0:0051188 <1e-4 slr7100 G0:0016053 <1e-4 s111433 G0:0015291 <1e-4 ss15007 G0:0000166 0.157  
slr1484 G0:0006721 <1e-4 s110188 G0:0050794 <1e-4 s110314 G0:0006811 <1e-4 slr0645 G0:0022803 <1e-4 s111063 G0:0000166 0.157  
ssr3341 G0:0009309 <1e-4 slr1342 G0:0006733 <1e-4 s110577 G0:0050789 <1e-4 ss15129 G0:0008171 <1e-4 slr1097 G0:0000166 0.157  
slr1914 G0:0048518 <1e-4 s110980 G0:0048519 <1e-4 ss10353 G0:0051186 <1e-4 slr0111 G0:0022832 <1e-4 s110406 G0:0000166 0.157  
s110249 G0:0046164 <1e-4 slr1847 G0:0006811 <1e-4 slr1258 G0:0009057 <1e-4 slr1913 G0:0022892 <1e-4 ss10312 G0:0000166 0.157  
s110183 G0:0009124 <1e-4 slr0305 G0:0006220 <1e-4 s110982 G0:0046128 <1e-4 slr6091 G0:0015267 <1e-4 s110328 G0:0000166 0.157  
slr1998 G0:0072528 <1e-4 ssr3571 G0:0006766 <1e-4 ssr2781 G0:0005996 <1e-4 s110253 G0:0022803 <1e-4 slr1863 G0:0000166 0.157  
s111722 G0:0009309 <1e-4 s111702 G0:0006793 <1e-4 s111542 G0:0009892 <1e-4 s110749 G0:0015291 <1e-4 ssr1499 G0:0000166 0.157  
s110910 G0:0071841 <1e-4 s111381 G0:0044275 <1e-4 slr6066 G0:0006766 <1e-4 s111285 G0:0003674 <1e-4 slr7016 G0:0000166 0.157  
slr2070 G0:0065007 <1e-4 s110615 G0:0009260 <1e-4 slr6064 G0:0019362 <1e-4 s111381 G0:0022857 <1e-4 slr0971 G0:0000166 0.157  
s110898 G0:0009892 <1e-4 slr5017 G0:0042455 <1e-4 slr0195 G0:0008610 <1e-4 slr1601 G0:0015077 <1e-4 slr1365 G0:0000166 0.157  
s110742 G0:0051186 <1e-4 s111089 G0:0019222 <1e-4 s110410 G0:0008150 <1e-4 s110216 G0:0022832 <1e-4 slr1923 G0:0000166 0.157  
ssr2803 G0:0048522 <1e-4 s111630 G0:0044248 <1e-4 slr5119 G0:0050794 <1e-4 slr1081 G0:0043492 <1e-4 slr1957 G0:0000166 0.157  
slr1413 G0:0009260 <1e-4 s110394 G0:0051246 <1e-4 ss15008 G0:0006220 <1e-4 s110175 G0:0060089 <1e-4 s111062 G0:0000166 0.157  
slr7037 G0:0009987 <1e-4 slr0431 G0:0046164 <1e-4 ss10738 G0:0046907 <1e-4 s111512 G0:0003674 <1e-4 slr0337 G0:0000166 0.157  
slr5024 G0:0009126 <1e-4 slr6066 G0:0051347 <1e-4 ss18005 G0:0052111 <1e-4 slr0273 G0:0022857 <1e-4 ss10461 G0:0000166 0.157  
ssr6019 G0:0072528 <1e-4 s118040 G0:0071840 <1e-4 slr6015 G0:0048523 <1e-4 s111925 G0:0016817 <1e-4 s112013 G0:0000166 0.157  
slr6091 G0:0048878 <1e-4 s111830 G0:0019219 <1e-4 s110294 G0:0031640 <1e-4 ssr6089 G0:0022832 <1e-4 slr1920 G0:0000166 0.157  
slr1365 G0:0009889 <1e-4 s110062 G0:0031326 <1e-4 slr1863 G0:0044281 <1e-4 slr1177 G0:0042623 <1e-4 s111651 G0:0000166 0.157  
slr6106 G0:0071496 <1e-4 s111891 G0:0009308 <1e-4 slr6033 G0:0043648 <1e-4 s110752 G0:0015077 <1e-4 ss11464 G0:0000166 0.157

ssl3829 G0:0009059 <1e-4 slr0249 G0:0072528 <1e-4 sl10645 G0:0016054 <1e-4 slr1762 G0:0022892 <1e-4 sl11400 G0:0000166 0.157  
sl10242 G0:0051171 <1e-4 sl10325 G0:0006066 <1e-4 ssl7048 G0:0050794 <1e-4 ssl2781 G0:0022892 <1e-4 slr7098 G0:0000166 0.157  
ssr3129 G0:0019637 <1e-4 slr0606 G0:0071842 <1e-4 sl10149 G0:0044003 <1e-4 sl11832 G0:0022857 <1e-4 ssl1923 G0:0000166 0.157  
sl10068 G0:0051179 <1e-4 slr1209 G0:0019219 <1e-4 sl10181 G0:0022607 <1e-4 sl10815 G0:0016818 <1e-4 sl11863 G0:0000166 0.157  
slr0914 G0:0044283 <1e-4 sl11773 G0:0065007 <1e-4 ssl2069 G0:0019222 <1e-4 slr1726 G0:0015405 <1e-4 sl11866 G0:0000166 0.157  
sl10911 G0:0009141 <1e-4 slr1056 G0:0071841 <1e-4 slr1535 G0:0006766 <1e-4 slr1266 G0:0022803 <1e-4 ssl8003 G0:0000166 0.157  
ssl1972 G0:0044275 <1e-4 slr1415 G0:0031323 <1e-4 sl10586 G0:0042455 <1e-4 sl10022 G0:0016818 <1e-4 slr0592 G0:0000166 0.157  
ssl7039 G0:0071840 <1e-4 slr7102 G0:0008150 <1e-4 sl11853 G0:0009123 <1e-4 slr0151 G0:0015293 <1e-4 sl10436 G0:0000166 0.157  
ssr1375 G0:0009199 <1e-4 slr6065 G0:0016052 <1e-4 slr1070 G0:0065007 <1e-4 sg10001 G0:0016462 <1e-4 sl15061 G0:0000166 0.157  
slr1900 G0:0001932 <1e-4 sl10786 G0:0042451 <1e-4 slr1464 G0:0009987 <1e-4 sl17070 G0:0016462 <1e-4 sl10008 G0:0000166 0.157  
slr7080 G0:0046483 <1e-4 sl11785 G0:0009123 <1e-4 slr0654 G0:0009892 <1e-4 ssl0352 G0:0016818 <1e-4 sl17064 G0:0000166 0.157  
slr1918 G0:0048878 <1e-4 slr1537 G0:0065007 <1e-4 sl10756 G0:0016053 <1e-4 slr0199 G0:0015075 <1e-4 slr7014 G0:0000166 0.157  
sl10007 G0:0052188 <1e-4 slr1768 G0:0051716 <1e-4 slr1353 G0:0009199 <1e-4 ssr6083 G0:0022836 <1e-4 sl11696 G0:0000166 0.157  
ssl15100 G0:0050794 <1e-4 slr0146 G0:0044255 <1e-4 sl10024 G0:0009165 <1e-4 sl10354 G0:0060089 <1e-4 slr0262 G0:0000166 0.157  
slr0291 G0:0043933 <1e-4 ssr3467 G0:0052111 <1e-4 sl10518 G0:0044106 <1e-4 slr1079 G0:0060089 <1e-4 ssl5096 G0:0000166 0.157  
slr1866 G0:0044003 <1e-4 slr0151 G0:0019752 <1e-4 slr1513 G0:0051246 <1e-4 sl11472 G0:0015399 <1e-4 slr1168 G0:0000166 0.157  
slr1082 G0:0009165 <1e-4 ssl5015 G0:0051716 <1e-4 ssr2754 G0:0009142 <1e-4 sl11570 G0:0015075 <1e-4 slr0038 G0:0000166 0.157  
ssl1520 G0:0022411 <1e-4 ssr1407 G0:0001932 <1e-4 sl10372 G0:0044248 <1e-4 slr0148 G0:0016746 <1e-4 sl11757 G0:0000166 0.157  
slr1097 G0:0071496 <1e-4 ssl7021 G0:0043648 <1e-4 slr1914 G0:0055082 <1e-4 ssl3382 G0:0015075 <1e-4 sl10423 G0:0000166 0.157  
sl10811 G0:0016054 <1e-4 sl11956 G0:0048519 <1e-4 slr2144 G0:0065007 <1e-4 ssl1552 G0:0016462 <1e-4 slr6021 G0:0000166 0.157  
sl10749 G0:0009262 <1e-4 ssl0739 G0:0006220 <1e-4 slr1619 G0:0005996 <1e-4 slr1438 G0:0043492 <1e-4 slr1260 G0:0000166 0.157  
sl11174 G0:0022411 <1e-4 slr1069 G0:0009150 <1e-4 ssl2245 G0:0009144 <1e-4 ssr0536 G0:0060089 <1e-4 sl10218 G0:0000166 0.157  
slr0588 G0:0052188 <1e-4 slr1174 G0:0009126 <1e-4 slr1097 G0:0044281 <1e-4 sl10180 G0:0060089 <1e-4 slr0959 G0:0000166 0.157  
slr5101 G0:0009165 <1e-4 slr0263 G0:0042455 <1e-4 slr1303 G0:0033013 <1e-4 slr0147 G0:0016462 <1e-4 sl11769 G0:0000166 0.157  
slr0642 G0:0016052 <1e-4 sl10102 G0:0016052 <1e-4 slr0975 G0:0048522 <1e-4 slr0241 G0:0016818 <1e-4 sl11853 G0:0000166 0.157  
sl11164 G0:0019362 <1e-4 sl15132 G0:0006733 <1e-4 slr6028 G0:0055114 <1e-4 sl11373 G0:0008171 <1e-4 slr6073 G0:0000166 0.157  
sl10995 G0:0006631 <1e-4 slr7081 G0:0051171 <1e-4 slr0645 G0:0034641 <1e-4 slr7091 G0:0005342 <1e-4 sl15090 G0:0000166 0.157  
ssl2996 G0:0031326 <1e-4 slr0816 G0:0006733 <1e-4 slr0196 G0:0009199 <1e-4 slr1378 G0:0022891 <1e-4 ssr1766 G0:0000166 0.157  
slr0912 G0:0006720 <1e-4 slr6014 G0:0016052 <1e-4 slr1084 G0:0016052 <1e-4 sl11155 G0:0042623 <1e-4 slr2101 G0:0000166 0.157  
sl11174 G0:0042180 <1e-4 slr1681 G0:0050789 <1e-4 sl11232 G0:0046483 <1e-4 slr1194 G0:0022836 <1e-4 sl11217 G0:0000166 0.157  
sl10760 G0:0072527 <1e-4 ssr3341 G0:0072522 <1e-4 slr0482 G0:0016052 <1e-4 ssl5096 G0:0022891 <1e-4 slr1546 G0:0000166 0.157  
sl11486 G0:0055082 <1e-4 slr0217 G0:0009056 <1e-4 ssl5103 G0:0006220 <1e-4 sl11692 G0:0022890 <1e-4 sl11722 G0:0000166 0.157  
sl10669 G0:0050801 <1e-4 slr6013 G0:0046483 <1e-4 slr0038 G0:0046128 <1e-4 slr2111 G0:0043492 <1e-4 sl10282 G0:0000166 0.157  
sl10413 G0:0046128 <1e-4 slr5126 G0:0009987 <1e-4 sl17055 G0:0051347 <1e-4 sl11737 G0:0015075 <1e-4 ssr6079 G0:0000166 0.157  
ssr1951 G0:0048522 <1e-4 slr2071 G0:0009123 <1e-4 ssl1255 G0:0051188 <1e-4 slr1920 G0:0022857 <1e-4 sl11735 G0:0000166 0.157  
sl11764 G0:0044255 <1e-4 sl10359 G0:0006793 <1e-4 sl10787 G0:0046128 <1e-4 slr1338 G0:0022803 <1e-4 sl15006 G0:0000166 0.157  
slr6063 G0:0043648 <1e-4 sl10872 G0:0072521 <1e-4 sl10309 G0:0009263 <1e-4 ssr2317 G0:0005342 <1e-4 slr1721 G0:0000166 0.157  
slr1762 G0:0034654 <1e-4 slr6066 G0:0010468 <1e-4 ssr7035 G0:0052111 <1e-4 slr0272 G0:0015293 <1e-4 slr0784 G0:0000166 0.157  
slr2011 G0:0034641 <1e-4 slr6014 G0:0048523 <1e-4 sl10274 G0:0008150 <1e-4 sl11442 G0:0022857 <1e-4 ssl2009 G0:0000166 0.157  
ssl15100 G0:0009991 <1e-4 sl11862 G0:0052188 <1e-4 sl17065 G0:0006733 <1e-4 sl11348 G0:0003674 <1e-4 sl15034 G0:0000166 0.157  
sl10428 G0:0009991 <1e-4 slr1276 G0:0009987 <1e-4 slr6106 G0:0034654 <1e-4 sl15033 G0:0022890 <1e-4 ssl2781 G0:0000166 0.157  
ssl0750 G0:0050789 <1e-4 slr6008 G0:0009889 <1e-4 slr0480 G0:0019752 <1e-4 sl11304 G0:0042623 <1e-4 sl10168 G0:0000166 0.157  
slr2120 G0:0006631 <1e-4 ssl0467 G0:0018130 <1e-4 sl11130 G0:0055086 <1e-4 slr0948 G0:0060089 <1e-4 ssr5020 G0:0000166 0.157  
sl11737 G0:0006576 <1e-4 slr1261 G0:0010556 <1e-4 slr1944 G0:0009892 <1e-4 slr0769 G0:0022832 <1e-4 slr0388 G0:0000166 0.157  
sl10518 G0:0051186 <1e-4 slr1927 G0:0072527 <1e-4 ssr1391 G0:0046483 <1e-4 slr0232 G0:0022803 <1e-4 ssr6020 G0:0000166 0.157  
ssr7093 G0:0009889 <1e-4 sl10997 G0:0044281 <1e-4 sl11675 G0:0050801 <1e-4 sl11472 G0:0022891 <1e-4 sl10293 G0:0000166 0.157  
slr0179 G0:0051188 <1e-4 slr0262 G0:0009262 <1e-4 slr0871 G0:0019751 <1e-4 ssl2471 G0:0043167 <1e-4 slr1768 G0:0000166 0.157  
slr1437 G0:0034654 <1e-4 slr0374 G0:0090304 <1e-4 slr1169 G0:0050794 <1e-4 sl10647 G0:0016818 <1e-4 ssr7072 G0:0000166 0.157  
slr8014 G0:0018130 <1e-4 slr1143 G0:0072524 <1e-4 sl10479 G0:0006732 <1e-4 sl11461 G0:0022803 <1e-4 slr0356 G0:0000166 0.157  
sl11764 G0:0044248 <1e-4 slr7012 G0:0022411 <1e-4 slr1474 G0:0006793 <1e-4 sl15004 G0:0022836 <1e-4 slr7015 G0:0000166 0.157  
ssr1499 G0:0009117 <1e-4 slr0725 G0:0042180 <1e-4 slr1362 G0:0006721 <1e-4 sl15128 G0:0015075 <1e-4 sl10181 G0:0000166 0.157  
sl16055 G0:0060255 <1e-4 ssl2420 G0:0009308 <1e-4 slr1342 G0:0065007 <1e-4 sl10688 G0:0043167 <1e-4 ssl5095 G0:0000166 0.157  
sl10496 G0:0071554 <1e-4 sl10359 G0:0043170 <1e-4 sl10785 G0:0072522 <1e-4 sl10982 G0:0043492 <1e-4 slr7080 G0:0000166 0.157  
ssr0109 G0:0034660 <1e-4 slr6090 G0:0051818 <1e-4 slr6047 G0:0009259 <1e-4 ssr2611 G0:0003674 <1e-4 sl11265 G0:0000166 0.157

|          |            |       |          |            |       |          |            |       |          |            |       |          |            |        |
|----------|------------|-------|----------|------------|-------|----------|------------|-------|----------|------------|-------|----------|------------|--------|
| slr1613  | G0:0005996 | <1e-4 | sl11040  | G0:0009165 | <1e-4 | slr0552  | G0:0019222 | <1e-4 | slr1773  | G0:0022832 | <1e-4 | sl10241  | G0:0000166 | 0.157  |
| sl11388  | G0:0072527 | <1e-4 | sl11512  | G0:0009124 | <1e-4 | slr1178  | G0:0051188 | <1e-4 | slr2122  | G0:0015291 | <1e-4 | ss11004  | G0:0000166 | 0.157  |
| sl11446  | G0:0071554 | <1e-4 | sl110837 | G0:0072527 | <1e-4 | sl110688 | G0:0080090 | <1e-4 | sl11995  | G0:0016462 | <1e-4 | sl111053 | G0:0000166 | 0.157  |
| slr0489  | G0:0051818 | <1e-4 | slr1768  | G0:0044283 | <1e-4 | ss12162  | G0:0072524 | <1e-4 | slr1406  | G0:0022832 | <1e-4 | sl11232  | G0:0000166 | 0.157  |
| sl11675  | G0:0006163 | <1e-4 | ss10738  | G0:0044281 | <1e-4 | sl115067 | G0:0009987 | <1e-4 | ss15103  | G0:0022832 | <1e-4 | sl111511 | G0:0000166 | 0.157  |
| slr7091  | G0:0009199 | <1e-4 | ss15064  | G0:0006811 | <1e-4 | sl117070 | G0:0051716 | <1e-4 | ss16061  | G0:0015399 | <1e-4 | sl110444 | G0:0000166 | 0.157  |
| sl10596  | G0:0006220 | <1e-4 | sl111163 | G0:0044003 | <1e-4 | sl11262  | G0:0051716 | <1e-4 | slr0912  | G0:0016817 | <1e-4 | sl18032  | G0:0000166 | 0.157  |
| sl11359  | G0:0008150 | <1e-4 | ss18028  | G0:0006576 | <1e-4 | slr0871  | G0:0044260 | <1e-4 | slr1223  | G0:0008171 | <1e-4 | slr0479  | G0:0000166 | 0.1568 |
| ss15008  | G0:0055086 | <1e-4 | slr0751  | G0:0009141 | <1e-4 | slr0848  | G0:0051234 | <1e-4 | sl11062  | G0:0022838 | <1e-4 | sl110183 | G0:0000166 | 0.1568 |
| sl117090 | G0:0044271 | <1e-4 | slr2125  | G0:0045184 | <1e-4 | sl110272 | G0:0050794 | <1e-4 | slr1472  | G0:0016818 | <1e-4 | sl110022 | G0:0000166 | 0.1568 |
| sl15132  | G0:0051188 | <1e-4 | ssr5011  | G0:0072521 | <1e-4 | ssr8047  | G0:0043933 | <1e-4 | sl115130 | G0:0016462 | <1e-4 | slr1307  | G0:0000166 | 0.1568 |
| slr5111  | G0:0051716 | <1e-4 | ss10352  | G0:0006721 | <1e-4 | slr6012  | G0:0055086 | <1e-4 | ssr6099  | G0:0015267 | <1e-4 | sl111526 | G0:0000166 | 0.1568 |
| slr0496  | G0:0050789 | <1e-4 | slr1306  | G0:0006766 | <1e-4 | sl119106 | G0:0009126 | <1e-4 | slr6049  | G0:0016746 | <1e-4 | slr1047  | G0:0000166 | 0.1568 |
| sl110630 | G0:0065007 | <1e-4 | slr1236  | G0:0009059 | <1e-4 | sl117047 | G0:0042451 | <1e-4 | slr1442  | G0:0043167 | <1e-4 | sl110822 | G0:0000166 | 0.1568 |
| sl11915  | G0:0042455 | <1e-4 | sl11675  | G0:0009056 | <1e-4 | slr0491  | G0:0009132 | <1e-4 | sl11021  | G0:0003674 | <1e-4 | ssr1391  | G0:0000166 | 0.1568 |
| slr1215  | G0:0042455 | <1e-4 | sl110272 | G0:0009987 | <1e-4 | slr6038  | G0:0072522 | <1e-4 | sl11638  | G0:0043167 | <1e-4 | slr1444  | G0:0000166 | 0.1568 |
| slr0453  | G0:0010556 | <1e-4 | sl110508 | G0:0080090 | <1e-4 | slr5077  | G0:0019752 | <1e-4 | slr0770  | G0:0022832 | <1e-4 | slr1847  | G0:0000166 | 0.1568 |
| slr0587  | G0:0009142 | <1e-4 | sl15109  | G0:0051818 | <1e-4 | slr5037  | G0:0043648 | <1e-4 | slr2032  | G0:0016462 | <1e-4 | sl110732 | G0:0000166 | 0.1568 |
| sl11380  | G0:0019637 | <1e-4 | sl111132 | G0:0044275 | <1e-4 | sl111158 | G0:0009987 | <1e-4 | slr0006  | G0:0043492 | <1e-4 | sl111344 | G0:0005488 | 0.1563 |
| sl11735  | G0:0052188 | <1e-4 | sl110394 | G0:0050794 | <1e-4 | slr1052  | G0:0046394 | <1e-4 | ss12471  | G0:0016741 | <1e-4 | sl111054 | G0:0005488 | 0.1563 |
| slr1110  | G0:0044283 | <1e-4 | sl110286 | G0:0009141 | <1e-4 | sl11399  | G0:0052111 | <1e-4 | sl115132 | G0:0015291 | <1e-4 | slr0483  | G0:0005488 | 0.1563 |
| slr1450  | G0:0065007 | <1e-4 | slr1340  | G0:0009059 | <1e-4 | sl110982 | G0:0008610 | <1e-4 | ss13615  | G0:0015267 | <1e-4 | sl111730 | G0:0005488 | 0.1563 |
| ss17022  | G0:0044248 | <1e-4 | sl11608  | G0:0009142 | <1e-4 | slr1397  | G0:0019222 | <1e-4 | slr1365  | G0:0022857 | <1e-4 | slr0742  | G0:0005488 | 0.1563 |
| slr1342  | G0:0072521 | <1e-4 | ssr1765  | G0:0051171 | <1e-4 | ssr2998  | G0:0034654 | <1e-4 | slr5018  | G0:0022838 | <1e-4 | slr0373  | G0:0005488 | 0.1563 |
| sl110281 | G0:0048518 | <1e-4 | sl110372 | G0:0034641 | <1e-4 | ss13692  | G0:0055114 | <1e-4 | slr5037  | G0:0008171 | <1e-4 | sl110688 | G0:0005488 | 0.1563 |
| ssr2962  | G0:0016053 | <1e-4 | slr1809  | G0:0046483 | <1e-4 | sl11675  | G0:0043170 | <1e-4 | slr6031  | G0:0022892 | <1e-4 | slr1033  | G0:0005488 | 0.1563 |
| slr0613  | G0:0043549 | <1e-4 | sl110752 | G0:0019637 | <1e-4 | sl111784 | G0:0019362 | <1e-4 | slr0468  | G0:0005342 | <1e-4 | slr0989  | G0:0005488 | 0.1563 |
| sl110872 | G0:0045184 | <1e-4 | slr1189  | G0:0006811 | <1e-4 | sl11232  | G0:0019637 | <1e-4 | sl11541  | G0:0015077 | <1e-4 | slr1209  | G0:0005488 | 0.1563 |
| sl111132 | G0:0006220 | <1e-4 | slr1070  | G0:0044106 | <1e-4 | sl11979  | G0:0051716 | <1e-4 | sl11307  | G0:0022836 | <1e-4 | slr0510  | G0:0005488 | 0.1563 |
| sl11950  | G0:0009056 | <1e-4 | sl11446  | G0:0044271 | <1e-4 | sl110424 | G0:0016052 | <1e-4 | slr1471  | G0:0042623 | <1e-4 | slr0172  | G0:0005488 | 0.1563 |
| sl11726  | G0:0048522 | <1e-4 | slr0725  | G0:0009056 | <1e-4 | sl110860 | G0:0018130 | <1e-4 | slr0964  | G0:0015399 | <1e-4 | sl110595 | G0:0005488 | 0.1563 |
| ss11464  | G0:0044260 | <1e-4 | slr2110  | G0:0009056 | <1e-4 | ss12138  | G0:0006066 | <1e-4 | slr1591  | G0:0016741 | <1e-4 | sl111352 | G0:0005488 | 0.1563 |
| ssr2755  | G0:0009263 | <1e-4 | slr2025  | G0:0044281 | <1e-4 | slr0294  | G0:0009126 | <1e-4 | sl110611 | G0:0016746 | <1e-4 | slr0249  | G0:0005488 | 0.1563 |
| sl11052  | G0:0042180 | <1e-4 | sl11632  | G0:0009308 | <1e-4 | slr1920  | G0:0048523 | <1e-4 | sl11352  | G0:0042623 | <1e-4 | sl110412 | G0:0005488 | 0.1563 |
| slr5018  | G0:0010556 | <1e-4 | ss17074  | G0:0009259 | <1e-4 | sl110149 | G0:0048522 | <1e-4 | slr5024  | G0:0060089 | <1e-4 | sl110623 | G0:0005488 | 0.1563 |
| sl110810 | G0:0044260 | <1e-4 | slr1187  | G0:0052111 | <1e-4 | slr2049  | G0:0044106 | <1e-4 | sl11241  | G0:0016818 | <1e-4 | slr1415  | G0:0005488 | 0.1563 |
| slr0619  | G0:0009117 | <1e-4 | slr0217  | G0:0009161 | <1e-4 | ssr2787  | G0:0019637 | <1e-4 | sl110696 | G0:0022857 | <1e-4 | slr1895  | G0:0005488 | 0.1563 |
| slr0702  | G0:0018130 | <1e-4 | sl115063 | G0:0051347 | <1e-4 | slr0356  | G0:0044282 | <1e-4 | sl11352  | G0:0022857 | <1e-4 | slr1613  | G0:0005488 | 0.1563 |
| slr1674  | G0:0009893 | <1e-4 | slr8014  | G0:0044248 | <1e-4 | ss15007  | G0:0016052 | <1e-4 | slr1788  | G0:0015405 | <1e-4 | ssr1552  | G0:0005488 | 0.1563 |
| sl110405 | G0:0051716 | <1e-4 | sl111119 | G0:0043412 | <1e-4 | slr5116  | G0:0009889 | <1e-4 | sl110630 | G0:0016746 | <1e-4 | slr1977  | G0:0005488 | 0.1563 |
| ssr3532  | G0:0005996 | <1e-4 | ssr2848  | G0:0042455 | <1e-4 | ss15114  | G0:0009892 | <1e-4 | slr1895  | G0:0016818 | <1e-4 | sl110156 | G0:0005488 | 0.1563 |
| ssr2142  | G0:0016051 | <1e-4 | slr1699  | G0:0051179 | <1e-4 | slr1530  | G0:0065007 | <1e-4 | ss18008  | G0:0016818 | <1e-4 | sl111660 | G0:0005488 | 0.1563 |
| sl11921  | G0:0043933 | <1e-4 | slr1470  | G0:0044248 | <1e-4 | ssr6099  | G0:0043648 | <1e-4 | slr1880  | G0:0022891 | <1e-4 | slr1809  | G0:0005488 | 0.1563 |
| slr1177  | G0:0045184 | <1e-4 | slr0264  | G0:0009057 | <1e-4 | slr0625  | G0:0042180 | <1e-4 | slr1047  | G0:0015075 | <1e-4 | sl110997 | G0:0005488 | 0.1563 |
| sl110237 | G0:0034654 | <1e-4 | slr1273  | G0:0060255 | <1e-4 | slr0184  | G0:0009144 | <1e-4 | sl110044 | G0:0016746 | <1e-4 | sl110787 | G0:0005488 | 0.1563 |
| sl110710 | G0:0016053 | <1e-4 | slr1383  | G0:0006811 | <1e-4 | sl110216 | G0:0006753 | <1e-4 | slr6075  | G0:0022836 | <1e-4 | sl110147 | G0:0005488 | 0.1563 |
| slr1339  | G0:0050801 | <1e-4 | slr1570  | G0:0055086 | <1e-4 | ssr0657  | G0:0044271 | <1e-4 | sl111002 | G0:0015399 | <1e-4 | sl110740 | G0:0005488 | 0.1563 |
| ss10352  | G0:0072528 | <1e-4 | ss10787  | G0:0071496 | <1e-4 | slr0147  | G0:0019752 | <1e-4 | slr1811  | G0:0022832 | <1e-4 | slr0468  | G0:0005488 | 0.1563 |
| slr0521  | G0:0071840 | <1e-4 | sl110822 | G0:0009117 | <1e-4 | ssr2781  | G0:0008150 | <1e-4 | slr0708  | G0:0016746 | <1e-4 | sl111634 | G0:0005488 | 0.1563 |
| sl110160 | G0:0051179 | <1e-4 | slr1110  | G0:0022411 | <1e-4 | sl117067 | G0:0006766 | <1e-4 | slr1647  | G0:0022838 | <1e-4 | slr0596  | G0:0005488 | 0.1563 |
| slr0924  | G0:0009260 | <1e-4 | slr1353  | G0:0031640 | <1e-4 | ssr0335  | G0:0019752 | <1e-4 | ssr6026  | G0:0022838 | <1e-4 | slr0104  | G0:0005488 | 0.1563 |
| slr1203  | G0:0051171 | <1e-4 | sl11938  | G0:0009165 | <1e-4 | ssr1041  | G0:0051716 | <1e-4 | sl110253 | G0:0005342 | <1e-4 | slr0962  | G0:0005488 | 0.1563 |
| sl11348  | G0:0005996 | <1e-4 | slr1667  | G0:0051188 | <1e-4 | sl118011 | G0:0046164 | <1e-4 | slr1236  | G0:0015399 | <1e-4 | slr0815  | G0:0005488 | 0.1563 |
| sl11052  | G0:0044248 | <1e-4 | slr6091  | G0:0006163 | <1e-4 | sl118033 | G0:0080090 | <1e-4 | slr1102  | G0:0043492 | <1e-4 | sl111925 | G0:0005488 | 0.1563 |

|         |            |       |         |            |       |         |            |       |         |            |       |         |            |        |
|---------|------------|-------|---------|------------|-------|---------|------------|-------|---------|------------|-------|---------|------------|--------|
| sl11656 | G0:0048519 | <1e-4 | sl11630 | G0:0009142 | <1e-4 | slr0637 | G0:0072521 | <1e-4 | ssr1256 | G0:0022857 | <1e-4 | slr1258 | G0:0005488 | 0.1563 |
| sl10296 | G0:0044271 | <1e-4 | sl11866 | G0:0009144 | <1e-4 | slr1222 | G0:0001932 | <1e-4 | slr0730 | G0:0003674 | <1e-4 | slr0554 | G0:0005488 | 0.1563 |
| sl11611 | G0:0043436 | <1e-4 | sl11613 | G0:0052111 | <1e-4 | sl11089 | G0:0072524 | <1e-4 | slr1095 | G0:0022803 | <1e-4 | slr1287 | G0:0005488 | 0.1563 |
| sl11222 | G0:0019637 | <1e-4 | sl10488 | G0:0031640 | <1e-4 | sl11315 | G0:0009056 | <1e-4 | ss10738 | G0:0015291 | <1e-4 | slr0053 | G0:0005488 | 0.1563 |
| sl10189 | G0:0009124 | <1e-4 | slr0299 | G0:0042455 | <1e-4 | sl10301 | G0:0052111 | <1e-4 | slr1576 | G0:0022890 | <1e-4 | sl11201 | G0:0005488 | 0.1563 |
| slr0582 | G0:0046394 | <1e-4 | slr1260 | G0:0009144 | <1e-4 | sl10447 | G0:0009165 | <1e-4 | slr6013 | G0:0022832 | <1e-4 | slr1152 | G0:0005488 | 0.1563 |
| slr1999 | G0:0051818 | <1e-4 | slr1920 | G0:0044281 | <1e-4 | slr1612 | G0:0022607 | <1e-4 | slr0545 | G0:0022857 | <1e-4 | slr1762 | G0:0005488 | 0.1563 |
| sl17067 | G0:0051188 | <1e-4 | sl10444 | G0:0072522 | <1e-4 | slr1087 | G0:0009308 | <1e-4 | slr0941 | G0:0022891 | <1e-4 | slr0111 | G0:0005488 | 0.1563 |
| sl18033 | G0:0009260 | <1e-4 | sl11414 | G0:0051188 | <1e-4 | sl11464 | G0:0019362 | <1e-4 | slr0388 | G0:0022857 | <1e-4 | slr1338 | G0:0005488 | 0.1563 |
| slr1122 | G0:0051186 | <1e-4 | sl10783 | G0:0009991 | <1e-4 | ssr1258 | G0:0044260 | <1e-4 | ssr1258 | G0:0022892 | <1e-4 | slr1668 | G0:0005488 | 0.1563 |
| slr2038 | G0:0019751 | <1e-4 | sl10447 | G0:0071554 | <1e-4 | slr1163 | G0:0016053 | <1e-4 | ss10467 | G0:0016462 | <1e-4 | slr1128 | G0:0005488 | 0.1563 |
| sl11340 | G0:0006163 | <1e-4 | sl11530 | G0:0043412 | <1e-4 | slr2049 | G0:0052188 | <1e-4 | sl17089 | G0:0015405 | <1e-4 | slr0112 | G0:0005488 | 0.1563 |
| slr1951 | G0:0006220 | <1e-4 | sl11652 | G0:0031640 | <1e-4 | slr1376 | G0:0043436 | <1e-4 | slr1450 | G0:0016746 | <1e-4 | sl17065 | G0:0005488 | 0.1563 |
| sl10024 | G0:0055086 | <1e-4 | sl10294 | G0:0005996 | <1e-4 | sl10639 | G0:0009394 | <1e-4 | slr6068 | G0:0016818 | <1e-4 | slr2038 | G0:0000166 | 0.1545 |
| sl10735 | G0:0006091 | <1e-4 | slr0601 | G0:0065007 | <1e-4 | sl11163 | G0:0006082 | <1e-4 | sg10001 | G0:0005342 | <1e-4 | sl10238 | G0:0000166 | 0.1545 |
| ssr1425 | G0:0044281 | <1e-4 | sl11608 | G0:0050789 | <1e-4 | sl10710 | G0:0090304 | <1e-4 | sl10857 | G0:0060089 | <1e-4 | slr0408 | G0:0000166 | 0.1545 |
| sl10781 | G0:0042451 | <1e-4 | sl11530 | G0:0031326 | <1e-4 | sl10198 | G0:0005996 | <1e-4 | sl10564 | G0:0016746 | <1e-4 | slr0208 | G0:0000166 | 0.1545 |
| sl11155 | G0:0055082 | <1e-4 | ss17042 | G0:0006066 | <1e-4 | sl11130 | G0:0046128 | <1e-4 | slr7015 | G0:0060089 | <1e-4 | sl11775 | G0:0000166 | 0.1545 |
| sl10861 | G0:0065007 | <1e-4 | slr2105 | G0:0009056 | <1e-4 | ssr1425 | G0:0016053 | <1e-4 | ss12009 | G0:0015405 | <1e-4 | slr0579 | G0:0000166 | 0.1545 |
| sl18040 | G0:0031640 | <1e-4 | sl10361 | G0:0008150 | <1e-4 | sl11355 | G0:0019752 | <1e-4 | ssr2009 | G0:0016817 | <1e-4 | slr0442 | G0:0000166 | 0.1545 |
| ssr0109 | G0:0043549 | <1e-4 | sl11510 | G0:0022607 | <1e-4 | slr0299 | G0:0046907 | <1e-4 | sl10487 | G0:0008171 | <1e-4 | slr0980 | G0:0000166 | 0.1545 |
| sl10898 | G0:0006091 | <1e-4 | sl11510 | G0:0031323 | <1e-4 | slr0581 | G0:0031326 | <1e-4 | slr1209 | G0:0016817 | <1e-4 | ssr2803 | G0:0000166 | 0.1545 |
| slr0606 | G0:0080090 | <1e-4 | sl16054 | G0:0051716 | <1e-4 | ss13549 | G0:0006220 | <1e-4 | ssr3572 | G0:0008171 | <1e-4 | ssr1258 | G0:0000166 | 0.1545 |
| slr0431 | G0:0046483 | <1e-4 | ss15098 | G0:0018130 | <1e-4 | slr2121 | G0:0033013 | <1e-4 | sl10588 | G0:0015075 | <1e-4 | sl10272 | G0:0000166 | 0.1545 |
| ssr6030 | G0:0006631 | <1e-4 | sl11769 | G0:0009165 | <1e-4 | slr1222 | G0:0046483 | <1e-4 | sl10327 | G0:0060089 | <1e-4 | slr0848 | G0:0000166 | 0.1545 |
| slr7099 | G0:0071840 | <1e-4 | slr1519 | G0:0051171 | <1e-4 | sl10735 | G0:0048518 | <1e-4 | sl11956 | G0:0022891 | <1e-4 | ss13291 | G0:0000166 | 0.1545 |
| sl10630 | G0:0042180 | <1e-4 | ss15015 | G0:0005996 | <1e-4 | sl11163 | G0:0006733 | <1e-4 | sl11389 | G0:0022892 | <1e-4 | slr1721 | G0:0005488 | 0.1509 |
| sl10325 | G0:0009308 | <1e-4 | sl11240 | G0:0042451 | <1e-4 | slr0634 | G0:0019751 | <1e-4 | slr6051 | G0:0015293 | <1e-4 | slr0598 | G0:0005488 | 0.1509 |
| sl11218 | G0:0046128 | <1e-4 | sl10157 | G0:0009161 | <1e-4 | sl11352 | G0:0009987 | <1e-4 | ss18003 | G0:0016462 | <1e-4 | slr2105 | G0:0005488 | 0.1509 |
| sl11142 | G0:0071554 | <1e-4 | sl10071 | G0:0051347 | <1e-4 | ssr1499 | G0:0009150 | <1e-4 | sl11068 | G0:0016462 | <1e-4 | sl11265 | G0:0005488 | 0.1509 |
| slr7024 | G0:0008150 | <1e-4 | slr0789 | G0:0006066 | <1e-4 | sl11570 | G0:0048518 | <1e-4 | slr6033 | G0:0005342 | <1e-4 | slr0619 | G0:0005488 | 0.1509 |
| sl17069 | G0:0009165 | <1e-4 | sl17050 | G0:0072524 | <1e-4 | slr1083 | G0:0055114 | <1e-4 | sl10911 | G0:0015293 | <1e-4 | sl10176 | G0:0005488 | 0.1509 |
| slr1647 | G0:0051188 | <1e-4 | sl10691 | G0:0065007 | <1e-4 | sl11880 | G0:0031640 | <1e-4 | slr1073 | G0:0015291 | <1e-4 | slr1958 | G0:0005488 | 0.1509 |
| ss12471 | G0:0044106 | <1e-4 | sl10423 | G0:0065007 | <1e-4 | slr6012 | G0:0042180 | <1e-4 | slr0142 | G0:0042623 | <1e-4 | slr0049 | G0:0005488 | 0.1509 |
| sl11380 | G0:0071842 | <1e-4 | ss13692 | G0:0009057 | <1e-4 | sl11340 | G0:0022607 | <1e-4 | slr1097 | G0:0015293 | <1e-4 | sl10265 | G0:0005488 | 0.1509 |
| ssr5106 | G0:0010556 | <1e-4 | slr0605 | G0:0071840 | <1e-4 | slr7073 | G0:0080090 | <1e-4 | slr0619 | G0:0016746 | <1e-4 | sl10775 | G0:0005488 | 0.1509 |
| slr0863 | G0:0016053 | <1e-4 | slr0285 | G0:0009057 | <1e-4 | slr0975 | G0:0034641 | <1e-4 | sl11217 | G0:0060089 | <1e-4 | ss11417 | G0:0005488 | 0.1509 |
| slr5073 | G0:0006811 | <1e-4 | slr7025 | G0:0006220 | <1e-4 | slr0262 | G0:0008610 | <1e-4 | sl10238 | G0:0022892 | <1e-4 | sl11509 | G0:0005488 | 0.1509 |
| sl11061 | G0:0042451 | <1e-4 | sl10147 | G0:0060255 | <1e-4 | sl10804 | G0:0006082 | <1e-4 | slr1702 | G0:0015267 | <1e-4 | slr6015 | G0:0005488 | 0.1509 |
| ssr6002 | G0:0090304 | <1e-4 | sl11359 | G0:0031323 | <1e-4 | sl10284 | G0:0009126 | <1e-4 | sl10793 | G0:0015291 | <1e-4 | slr1263 | G0:0005488 | 0.1509 |
| sl11424 | G0:0009124 | <1e-4 | sl11396 | G0:0022607 | <1e-4 | slr1702 | G0:0006733 | <1e-4 | sl11773 | G0:0015077 | <1e-4 | slr6039 | G0:0005488 | 0.1509 |
| sl10752 | G0:0051171 | <1e-4 | slr0637 | G0:0009117 | <1e-4 | sl11173 | G0:0009262 | <1e-4 | sl10910 | G0:0015291 | <1e-4 | slr2119 | G0:0005488 | 0.1509 |
| sl10623 | G0:0052188 | <1e-4 | slr0865 | G0:0009199 | <1e-4 | slr0962 | G0:0019219 | <1e-4 | sl11960 | G0:0015291 | <1e-4 | slr0601 | G0:0005488 | 0.1509 |
| sl11119 | G0:0046128 | <1e-4 | sl11086 | G0:0010468 | <1e-4 | slr0692 | G0:0043648 | <1e-4 | slr8021 | G0:0016746 | <1e-4 | ss10312 | G0:0005488 | 0.1509 |
| sl11265 | G0:0009259 | <1e-4 | slr7026 | G0:0071840 | <1e-4 | sl10167 | G0:0034654 | <1e-4 | slr1721 | G0:0005342 | <1e-4 | slr1168 | G0:0005488 | 0.1509 |
| slr2025 | G0:0006091 | <1e-4 | ssr2551 | G0:0071842 | <1e-4 | sl10174 | G0:0055114 | <1e-4 | sl11089 | G0:0022803 | <1e-4 | sl11004 | G0:0005488 | 0.1509 |
| ss10353 | G0:0044248 | <1e-4 | sl11233 | G0:0071841 | <1e-4 | sl11442 | G0:0009308 | <1e-4 | slr0801 | G0:0016818 | <1e-4 | sl11764 | G0:0005488 | 0.1509 |
| ss12069 | G0:0009059 | <1e-4 | slr0863 | G0:0009142 | <1e-4 | sl11583 | G0:0050794 | <1e-4 | slr1398 | G0:0015077 | <1e-4 | slr0151 | G0:0005488 | 0.1509 |
| sl11285 | G0:0009991 | <1e-4 | sl10068 | G0:0072524 | <1e-4 | slr1923 | G0:0016054 | <1e-4 | sl10547 | G0:0003674 | <1e-4 | slr1273 | G0:0005488 | 0.1509 |
| slr7092 | G0:0009991 | <1e-4 | slr0598 | G0:0051179 | <1e-4 | ssr5011 | G0:0006793 | <1e-4 | sl11396 | G0:0016741 | <1e-4 | sl17062 | G0:0005488 | 0.1509 |
| sl18035 | G0:0019219 | <1e-4 | slr1507 | G0:0022411 | <1e-4 | slr0642 | G0:0044003 | <1e-4 | sl10994 | G0:0016741 | <1e-4 | sl10168 | G0:0005488 | 0.1509 |
| slr1384 | G0:0009150 | <1e-4 | slr1169 | G0:0031323 | <1e-4 | ss11918 | G0:0009262 | <1e-4 | sl10225 | G0:0022857 | <1e-4 | sl10406 | G0:0005488 | 0.1509 |
| sl10498 | G0:0010556 | <1e-4 | slr1819 | G0:0019222 | <1e-4 | slr0491 | G0:0009892 | <1e-4 | slr0810 | G0:0042623 | <1e-4 | sl10727 | G0:0005488 | 0.1509 |
| slr7095 | G0:0044283 | <1e-4 | slr0392 | G0:0006721 | <1e-4 | slr6091 | G0:0043436 | <1e-4 | slr0334 | G0:0015077 | <1e-4 | sl10930 | G0:0005488 | 0.1509 |

|         |            |       |         |            |       |         |            |       |         |            |       |         |            |        |
|---------|------------|-------|---------|------------|-------|---------|------------|-------|---------|------------|-------|---------|------------|--------|
| s111447 | G0:0045184 | <1e-4 | s111634 | G0:0051818 | <1e-4 | s1r0039 | G0:0042180 | <1e-4 | s110886 | G0:0016746 | <1e-4 | s111025 | G0:0005488 | 0.1509 |
| ssl1792 | G0:0008610 | <1e-4 | ssr0335 | G0:0051186 | <1e-4 | ssr0759 | G0:0010468 | <1e-4 | s1r0376 | G0:0015291 | <1e-4 | s110815 | G0:0005488 | 0.1509 |
| s117070 | G0:0006733 | <1e-4 | s1r0038 | G0:0044260 | <1e-4 | s1r1116 | G0:0042455 | <1e-4 | s111068 | G0:0008171 | <1e-4 | ss15045 | G0:0005488 | 0.1509 |
| s111062 | G0:0043436 | <1e-4 | s111652 | G0:0065007 | <1e-4 | s1r1070 | G0:0052111 | <1e-4 | s111222 | G0:0022832 | <1e-4 | s1r6064 | G0:0005488 | 0.1509 |
| s111061 | G0:0006733 | <1e-4 | s115132 | G0:0031640 | <1e-4 | s111766 | G0:0050896 | <1e-4 | s110189 | G0:0042623 | <1e-4 | s115047 | G0:0005488 | 0.1509 |
| ssl0312 | G0:0009126 | <1e-4 | s1r7099 | G0:0051716 | <1e-4 | s111251 | G0:0051179 | <1e-4 | s1r5126 | G0:0015291 | <1e-4 | s1r1619 | G0:0005488 | 0.1509 |
| ssr3129 | G0:0006091 | <1e-4 | ssr3341 | G0:0050794 | <1e-4 | s111461 | G0:0051347 | <1e-4 | s1r0957 | G0:0022832 | <1e-4 | s1r0960 | G0:0005488 | 0.1509 |
| s111061 | G0:0071554 | <1e-4 | s1r2011 | G0:0044260 | <1e-4 | s110147 | G0:0006576 | <1e-4 | s1r1681 | G0:0003674 | <1e-4 | s1r7101 | G0:0005488 | 0.1509 |
| s115030 | G0:0042455 | <1e-4 | s1r1721 | G0:0072527 | <1e-4 | ssr2611 | G0:0065007 | <1e-4 | s1r1613 | G0:0022838 | <1e-4 | s111651 | G0:0005488 | 0.1509 |
| ssr2439 | G0:0031326 | <1e-4 | s1r1117 | G0:0006082 | <1e-4 | s1r1203 | G0:0071554 | <1e-4 | s110010 | G0:0016746 | <1e-4 | ssr6079 | G0:0005488 | 0.1509 |
| s111400 | G0:0006811 | <1e-4 | s1r0848 | G0:0009893 | <1e-4 | s1r0695 | G0:0046128 | <1e-4 | s116054 | G0:0016741 | <1e-4 | ssr6085 | G0:0005488 | 0.1509 |
| s1r0888 | G0:0052188 | <1e-4 | s110898 | G0:0019752 | <1e-4 | s1r1107 | G0:0034641 | <1e-4 | s117087 | G0:0015077 | <1e-4 | s1r0606 | G0:0005488 | 0.1509 |
| s1r1179 | G0:0055114 | <1e-4 | ssl3142 | G0:0051171 | <1e-4 | s110785 | G0:0051179 | <1e-4 | ssr3129 | G0:0022857 | <1e-4 | ssr6026 | G0:0005488 | 0.1509 |
| s111251 | G0:0034641 | <1e-4 | s1r1098 | G0:0010556 | <1e-4 | s1r1557 | G0:0006721 | <1e-4 | s1r0053 | G0:0042623 | <1e-4 | s1r1116 | G0:0005488 | 0.1509 |
| ssr2318 | G0:0009165 | <1e-4 | s115026 | G0:0072521 | <1e-4 | s1r0667 | G0:0051246 | <1e-4 | ssr0692 | G0:0022836 | <1e-4 | s1r6013 | G0:0005488 | 0.1509 |
| ssr3154 | G0:0051818 | <1e-4 | s1r0400 | G0:0031323 | <1e-4 | s1r0208 | G0:0019637 | <1e-4 | ssr2009 | G0:0008171 | <1e-4 | s1r1611 | G0:0005488 | 0.1509 |
| s1r0169 | G0:0006720 | <1e-4 | s111906 | G0:0042455 | <1e-4 | s1r1505 | G0:0072527 | <1e-4 | s1r0291 | G0:0016818 | <1e-4 | s110008 | G0:0005488 | 0.1509 |
| s110188 | G0:0044275 | <1e-4 | s110858 | G0:0019752 | <1e-4 | s1r1179 | G0:0065007 | <1e-4 | s1r2005 | G0:0022832 | <1e-4 | s1r1864 | G0:0005488 | 0.1509 |
| s110103 | G0:0044255 | <1e-4 | s110743 | G0:0006631 | <1e-4 | s111925 | G0:0046128 | <1e-4 | s1r0634 | G0:0015405 | <1e-4 | s110553 | G0:0005488 | 0.1509 |
| s111563 | G0:0034654 | <1e-4 | ssl1046 | G0:0051171 | <1e-4 | s111675 | G0:0009260 | <1e-4 | s115067 | G0:0008171 | <1e-4 | s1r0964 | G0:0005488 | 0.1509 |
| s117050 | G0:0006163 | <1e-4 | s117062 | G0:0046394 | <1e-4 | s111004 | G0:0009123 | <1e-4 | s110913 | G0:0008171 | <1e-4 | s111862 | G0:0005488 | 0.1509 |
| s110930 | G0:0006066 | <1e-4 | s1r1162 | G0:0051347 | <1e-4 | s110069 | G0:0016052 | <1e-4 | s116055 | G0:0015293 | <1e-4 | s1r0195 | G0:0005488 | 0.1509 |
| s1r8044 | G0:0048518 | <1e-4 | s1r1541 | G0:0051246 | <1e-4 | s1r1865 | G0:0005996 | <1e-4 | s1r2003 | G0:0043167 | <1e-4 | s111273 | G0:0005488 | 0.1509 |
| ssr3189 | G0:0034641 | <1e-4 | s110449 | G0:0019219 | <1e-4 | s111912 | G0:0071840 | <1e-4 | s111319 | G0:0043492 | <1e-4 | s1r1464 | G0:0005488 | 0.1509 |
| ssr6086 | G0:0071840 | <1e-4 | s1r1438 | G0:0042451 | <1e-4 | s1r0151 | G0:0009123 | <1e-4 | s1r1143 | G0:0022838 | <1e-4 | s111884 | G0:0005488 | 0.1509 |
| s110071 | G0:0006793 | <1e-4 | s112006 | G0:0006631 | <1e-4 | s1r2032 | G0:0046164 | <1e-4 | s1r0680 | G0:0022803 | <1e-4 | ss12781 | G0:0005488 | 0.1509 |
| s110216 | G0:0009889 | <1e-4 | s111191 | G0:0006576 | <1e-4 | s117031 | G0:0006753 | <1e-4 | s111164 | G0:0005342 | <1e-4 | s110328 | G0:0005488 | 0.1509 |
| s111225 | G0:0043549 | <1e-4 | s110176 | G0:0051179 | <1e-4 | s1r1270 | G0:0022607 | <1e-4 | ss17045 | G0:0043167 | <1e-4 | ssr1499 | G0:0005488 | 0.1509 |
| s111606 | G0:0051347 | <1e-4 | s110861 | G0:0055086 | <1e-4 | s110149 | G0:0006732 | <1e-4 | ss15045 | G0:0008171 | <1e-4 | s1r1568 | G0:0005488 | 0.1509 |
| s1r1437 | G0:0072527 | <1e-4 | s1r0740 | G0:0022411 | <1e-4 | s111906 | G0:0050801 | <1e-4 | s1r2122 | G0:0022838 | <1e-4 | s1r6080 | G0:0005488 | 0.1509 |
| ssl1552 | G0:0051716 | <1e-4 | ssr3189 | G0:0071842 | <1e-4 | s1r6033 | G0:0019222 | <1e-4 | ss12162 | G0:0022832 | <1e-4 | s1r1768 | G0:0005488 | 0.1509 |
| s1r1571 | G0:0019751 | <1e-4 | s1r0393 | G0:0009987 | <1e-4 | s111884 | G0:0051234 | <1e-4 | s1r0065 | G0:0022857 | <1e-4 | s111961 | G0:0005488 | 0.1509 |
| s1r0273 | G0:0052111 | <1e-4 | s1r0976 | G0:0071840 | <1e-4 | ssr2843 | G0:0046483 | <1e-4 | s110524 | G0:0022836 | <1e-4 | s1r1260 | G0:0005488 | 0.1509 |
| ssr1256 | G0:0006793 | <1e-4 | s111476 | G0:0065007 | <1e-4 | s1r0723 | G0:0009123 | <1e-4 | s1r1101 | G0:0016462 | <1e-4 | s1r0264 | G0:0005488 | 0.1509 |
| s110360 | G0:0043436 | <1e-4 | ssr3467 | G0:0046483 | <1e-4 | ss18039 | G0:0005996 | <1e-4 | s115128 | G0:0015291 | <1e-4 | s1r1547 | G0:0005488 | 0.1509 |
| ssl1300 | G0:0009126 | <1e-4 | s110449 | G0:0051234 | <1e-4 | s111832 | G0:0046483 | <1e-4 | s111252 | G0:0015399 | <1e-4 | ss12920 | G0:0005488 | 0.1509 |
| s110661 | G0:0006733 | <1e-4 | s117066 | G0:0050801 | <1e-4 | ssr7035 | G0:0006163 | <1e-4 | s1r1778 | G0:0043492 | <1e-4 | s111160 | G0:0005488 | 0.1509 |
| s1r7082 | G0:0046907 | <1e-4 | ssr7079 | G0:0042451 | <1e-4 | s110047 | G0:0009991 | <1e-4 | s1r0602 | G0:0016817 | <1e-4 | s110293 | G0:0005488 | 0.1509 |
| ssl2420 | G0:0009057 | <1e-4 | s1r0586 | G0:0006631 | <1e-4 | ss12384 | G0:0051347 | <1e-4 | s111921 | G0:0022857 | <1e-4 | s1r2118 | G0:0005488 | 0.1509 |
| s1r1636 | G0:0080090 | <1e-4 | s110497 | G0:0044106 | <1e-4 | s1r1062 | G0:0044281 | <1e-4 | ssr2781 | G0:0015405 | <1e-4 | s110742 | G0:0005488 | 0.1509 |
| s1r1753 | G0:0006576 | <1e-4 | s1r6008 | G0:0072524 | <1e-4 | s1r0613 | G0:0051171 | <1e-4 | s111960 | G0:0022803 | <1e-4 | s111510 | G0:0005488 | 0.1509 |
| ss15098 | G0:0051246 | <1e-4 | s1r1107 | G0:0034654 | <1e-4 | ss15113 | G0:0034654 | <1e-4 | s111698 | G0:0043492 | <1e-4 | ss12009 | G0:0005488 | 0.1509 |
| s110552 | G0:0006733 | <1e-4 | s111109 | G0:0034654 | <1e-4 | s1r0480 | G0:0044281 | <1e-4 | s111233 | G0:0015399 | <1e-4 | s1r0146 | G0:0005488 | 0.1509 |
| ssr2972 | G0:0031640 | <1e-4 | s1r0645 | G0:0071840 | <1e-4 | s115090 | G0:0006576 | <1e-4 | s111511 | G0:0043492 | <1e-4 | s110473 | G0:0005488 | 0.1509 |
| s110996 | G0:0044283 | <1e-4 | s110414 | G0:0055082 | <1e-4 | s110749 | G0:0009141 | <1e-4 | s110280 | G0:0015267 | <1e-4 | ssr7036 | G0:0005488 | 0.1509 |
| s110905 | G0:0016053 | <1e-4 | s111289 | G0:0042180 | <1e-4 | s1r1519 | G0:0044260 | <1e-4 | s1r1187 | G0:0016818 | <1e-4 | s110448 | G0:0005488 | 0.1509 |
| ssl7007 | G0:0009124 | <1e-4 | s110298 | G0:0010468 | <1e-4 | ss10242 | G0:0034641 | <1e-4 | ss13549 | G0:0015077 | <1e-4 | s118004 | G0:0005488 | 0.1509 |
| s110609 | G0:0006163 | <1e-4 | s1r1449 | G0:0009165 | <1e-4 | ss15091 | G0:0009123 | <1e-4 | s110060 | G0:0015077 | <1e-4 | s111400 | G0:0005488 | 0.1509 |
| ssr3154 | G0:0052188 | <1e-4 | s110863 | G0:0072524 | <1e-4 | ss11918 | G0:0043170 | <1e-4 | s111532 | G0:0016746 | <1e-4 | s1r1097 | G0:0005488 | 0.1509 |
| s111061 | G0:0019752 | <1e-4 | s1r0341 | G0:0006733 | <1e-4 | s1r6101 | G0:0044255 | <1e-4 | s110933 | G0:0015405 | <1e-4 | ssr5020 | G0:0005488 | 0.1509 |
| s1r7083 | G0:0031326 | <1e-4 | s110678 | G0:0009142 | <1e-4 | s111702 | G0:0009892 | <1e-4 | s1r2103 | G0:0015291 | <1e-4 | s111203 | G0:0005488 | 0.1509 |
| s1r1636 | G0:0006576 | <1e-4 | s1r5023 | G0:0043648 | <1e-4 | s111267 | G0:0006733 | <1e-4 | s1r1864 | G0:0022836 | <1e-4 | s1r7082 | G0:0005488 | 0.1509 |
| ssr1698 | G0:0019752 | <1e-4 | s111476 | G0:0019222 | <1e-4 | ss15031 | G0:0009263 | <1e-4 | s118033 | G0:0016746 | <1e-4 | ssr3341 | G0:0005488 | 0.1509 |
| s111036 | G0:0065007 | <1e-4 | s1r0517 | G0:0009893 | <1e-4 | s1r0818 | G0:0072522 | <1e-4 | s118002 | G0:0022838 | <1e-4 | s110609 | G0:0005488 | 0.1509 |

|         |            |       |         |            |       |         |            |       |         |            |       |         |            |        |
|---------|------------|-------|---------|------------|-------|---------|------------|-------|---------|------------|-------|---------|------------|--------|
| s110505 | G0:0009262 | <1e-4 | s1r1546 | G0:0006721 | <1e-4 | ss15064 | G0:0006066 | <1e-4 | s111630 | G0:0015077 | <1e-4 | s1r1261 | G0:0005488 | 0.1509 |
| s1r1959 | G0:0006091 | <1e-4 | s111761 | G0:0019752 | <1e-4 | s111656 | G0:0072522 | <1e-4 | s1r0554 | G0:0022891 | <1e-4 | s111217 | G0:0005488 | 0.1509 |
| s1r0092 | G0:0006732 | <1e-4 | s110933 | G0:0072521 | <1e-4 | ss18003 | G0:0019222 | <1e-4 | s1r5023 | G0:0016746 | <1e-4 | s1r1566 | G0:0005488 | 0.1509 |
| s1r0730 | G0:0009141 | <1e-4 | s110424 | G0:0051234 | <1e-4 | s1r2032 | G0:0044271 | <1e-4 | s110860 | G0:0015291 | <1e-4 | s110751 | G0:0005488 | 0.1509 |
| s1r0960 | G0:0019752 | <1e-4 | s1r0625 | G0:0051818 | <1e-4 | s110488 | G0:0048519 | <1e-4 | s1r0388 | G0:0022803 | <1e-4 | s1r7095 | G0:0005488 | 0.1509 |
| s110939 | G0:0048523 | <1e-4 | s1r0442 | G0:0043412 | <1e-4 | s110382 | G0:0009150 | <1e-4 | s1r1923 | G0:0005342 | <1e-4 | s1r1207 | G0:0005488 | 0.1509 |
| s115047 | G0:0043436 | <1e-4 | s110436 | G0:0080090 | <1e-4 | s1r1223 | G0:0005996 | <1e-4 | s111512 | G0:0022836 | <1e-4 | s1r5118 | G0:0005488 | 0.1509 |
| s111832 | G0:0042180 | <1e-4 | s1r1127 | G0:0022411 | <1e-4 | s1r0103 | G0:0009161 | <1e-4 | s1r1886 | G0:0022891 | <1e-4 | ssr2554 | G0:0005488 | 0.1509 |
| s110860 | G0:0051246 | <1e-4 | s1r0514 | G0:0009117 | <1e-4 | s1r1774 | G0:0031640 | <1e-4 | s111873 | G0:0022836 | <1e-4 | ssr5120 | G0:0005488 | 0.1509 |
| s1r0109 | G0:0006091 | <1e-4 | s110424 | G0:0072527 | <1e-4 | s111671 | G0:0031326 | <1e-4 | s1r0249 | G0:0022832 | <1e-4 | s110811 | G0:0005488 | 0.1509 |
| ss10483 | G0:0009394 | <1e-4 | s1r0341 | G0:0006793 | <1e-4 | s1r1397 | G0:0043436 | <1e-4 | s1r6100 | G0:0022836 | <1e-4 | s1r1927 | G0:0005488 | 0.1509 |
| s1r1570 | G0:0019751 | <1e-4 | s110436 | G0:0009056 | <1e-4 | s1r1619 | G0:0010468 | <1e-4 | ssr2554 | G0:0005342 | <1e-4 | s111722 | G0:0005488 | 0.1509 |
| s111784 | G0:0044271 | <1e-4 | s115132 | G0:0019752 | <1e-4 | ss15064 | G0:0051171 | <1e-4 | s1r0337 | G0:0022857 | <1e-4 | s1r1535 | G0:0005488 | 0.1509 |
| s1r1618 | G0:0009059 | <1e-4 | s110319 | G0:0046164 | <1e-4 | s111086 | G0:0043648 | <1e-4 | s110068 | G0:0022832 | <1e-4 | s1r1472 | G0:0005488 | 0.1509 |
| ss15007 | G0:0072521 | <1e-4 | s1r1218 | G0:0055086 | <1e-4 | s1r0358 | G0:0051716 | <1e-4 | s1r0065 | G0:0015405 | <1e-4 | s111765 | G0:0005488 | 0.1509 |
| s110736 | G0:0044282 | <1e-4 | s1r1907 | G0:0006720 | <1e-4 | s1r0848 | G0:0044281 | <1e-4 | s111691 | G0:0015399 | <1e-4 | s1r1677 | G0:0005488 | 0.1509 |
| s110837 | G0:0050789 | <1e-4 | s115089 | G0:0044271 | <1e-4 | s111658 | G0:0044275 | <1e-4 | ss17022 | G0:0016741 | <1e-4 | s110478 | G0:0005488 | 0.1509 |
| s111254 | G0:0009262 | <1e-4 | s1r1203 | G0:0006082 | <1e-4 | s1r0271 | G0:0065007 | <1e-4 | s110188 | G0:0015291 | <1e-4 | ss11498 | G0:0005488 | 0.1509 |
| s1r1142 | G0:0080090 | <1e-4 | s1r1864 | G0:0055082 | <1e-4 | s1r1852 | G0:0016054 | <1e-4 | s1r1056 | G0:0016817 | <1e-4 | s1r0148 | G0:0005488 | 0.1509 |
| s1r5021 | G0:0044275 | <1e-4 | ss11300 | G0:0006793 | <1e-4 | s112006 | G0:0022607 | <1e-4 | s110008 | G0:0016746 | <1e-4 | s110761 | G0:0005488 | 0.1509 |
| ss11378 | G0:0009165 | <1e-4 | s110382 | G0:0006066 | <1e-4 | s1r7095 | G0:0009124 | <1e-4 | s111132 | G0:0022892 | <1e-4 | s1r0505 | G0:0005488 | 0.1509 |
| s1r0645 | G0:0006811 | <1e-4 | s1r1174 | G0:0048522 | <1e-4 | s1r1753 | G0:0044275 | <1e-4 | s110565 | G0:0015293 | <1e-4 | s118032 | G0:0005488 | 0.1509 |
| sg10002 | G0:0043412 | <1e-4 | s1r0238 | G0:0006091 | <1e-4 | s1r1266 | G0:0048523 | <1e-4 | s1r0076 | G0:0015267 | <1e-4 | s115033 | G0:0005488 | 0.1509 |
| s1r1507 | G0:0043648 | <1e-4 | s1r7098 | G0:0008150 | <1e-4 | s1r0392 | G0:0043412 | <1e-4 | s110765 | G0:0022838 | <1e-4 | ss15129 | G0:0005488 | 0.1509 |
| s110294 | G0:0044106 | <1e-4 | s1r1101 | G0:0009123 | <1e-4 | s1r1222 | G0:0018130 | <1e-4 | ss12814 | G0:0016462 | <1e-4 | s115044 | G0:0005488 | 0.1509 |
| s1r7010 | G0:0009991 | <1e-4 | s111835 | G0:0060255 | <1e-4 | s1r1935 | G0:0055086 | <1e-4 | s110172 | G0:0060089 | <1e-4 | s111571 | G0:0005488 | 0.1509 |
| s110189 | G0:0046394 | <1e-4 | s1r1573 | G0:0009144 | <1e-4 | ss12749 | G0:0044271 | <1e-4 | s111638 | G0:0015399 | <1e-4 | s1r7015 | G0:0005488 | 0.1509 |
| s115003 | G0:0051171 | <1e-4 | s1r7037 | G0:0051716 | <1e-4 | s110985 | G0:0009059 | <1e-4 | s110997 | G0:0042623 | <1e-4 | ss12245 | G0:0005488 | 0.1509 |
| s1r1152 | G0:0009126 | <1e-4 | s110174 | G0:0060255 | <1e-4 | s111527 | G0:0006631 | <1e-4 | s110727 | G0:0015077 | <1e-4 | s1r0380 | G0:0005488 | 0.1509 |
| s1r1648 | G0:0034654 | <1e-4 | s111692 | G0:0050789 | <1e-4 | ssr5120 | G0:0006576 | <1e-4 | s111764 | G0:0043167 | <1e-4 | ssr6048 | G0:0005488 | 0.1509 |
| s110863 | G0:0048522 | <1e-4 | s110369 | G0:0009126 | <1e-4 | s110763 | G0:0060255 | <1e-4 | s1r1385 | G0:0016817 | <1e-4 | s1r0695 | G0:0005488 | 0.1509 |
| ssr2848 | G0:0009117 | <1e-4 | s111979 | G0:0031323 | <1e-4 | ss17021 | G0:0016054 | <1e-4 | ssr3410 | G0:0015291 | <1e-4 | s1r1103 | G0:0005488 | 0.1509 |
| s1r6008 | G0:0043170 | <1e-4 | ssr6019 | G0:0090304 | <1e-4 | ssr2975 | G0:0046907 | <1e-4 | s110678 | G0:0015267 | <1e-4 | ssr3410 | G0:0005488 | 0.1509 |
| s1r1066 | G0:0042451 | <1e-4 | s1r0386 | G0:0050896 | <1e-4 | s110328 | G0:0018130 | <1e-4 | s1r1505 | G0:0043167 | <1e-4 | s1r1407 | G0:0005488 | 0.1509 |
| s1r0204 | G0:0055086 | <1e-4 | s1r0374 | G0:0006793 | <1e-4 | s112013 | G0:0072522 | <1e-4 | s1r1394 | G0:0022832 | <1e-4 | s110659 | G0:0005488 | 0.1509 |
| ssr6024 | G0:0006220 | <1e-4 | s111511 | G0:0006220 | <1e-4 | s110272 | G0:0009892 | <1e-4 | s110656 | G0:0022891 | <1e-4 | s1r1315 | G0:0005488 | 0.1509 |
| s1r0142 | G0:0060255 | <1e-4 | s1r1505 | G0:0019751 | <1e-4 | s110875 | G0:0034641 | <1e-4 | s1r1116 | G0:0022803 | <1e-4 | s1r0769 | G0:0005488 | 0.1509 |
| s1r5127 | G0:0046128 | <1e-4 | s117089 | G0:0006793 | <1e-4 | s1r0333 | G0:0018130 | <1e-4 | s1r6090 | G0:0015291 | <1e-4 | s1r1378 | G0:0005488 | 0.1509 |
| s1r0039 | G0:0005996 | <1e-4 | s111241 | G0:0043412 | <1e-4 | s111552 | G0:0051347 | <1e-4 | s1r1413 | G0:0005342 | <1e-4 | s1r0398 | G0:0005488 | 0.1509 |
| s1r1601 | G0:0044248 | <1e-4 | s110314 | G0:0009889 | <1e-4 | s111659 | G0:0009142 | <1e-4 | s111570 | G0:0016462 | <1e-4 | s112013 | G0:0005488 | 0.1509 |
| s1r7101 | G0:0048878 | <1e-4 | s1r1537 | G0:0072524 | <1e-4 | ssr5019 | G0:0072521 | <1e-4 | s1r0957 | G0:0060089 | <1e-4 | s1r0065 | G0:0005488 | 0.1509 |
| s1r1045 | G0:0051171 | <1e-4 | s111530 | G0:0042455 | <1e-4 | s1r1240 | G0:0009394 | <1e-4 | s111979 | G0:0016462 | <1e-4 | s1r6031 | G0:0005488 | 0.1509 |
| s1r1470 | G0:0060255 | <1e-4 | s110286 | G0:0009126 | <1e-4 | s1r0142 | G0:0009150 | <1e-4 | ss18039 | G0:0015075 | <1e-4 | s1r1614 | G0:0000166 | 0.149  |
| s1r1383 | G0:0010556 | <1e-4 | s1r1537 | G0:0051171 | <1e-4 | s1r2025 | G0:0055086 | <1e-4 | s1r1917 | G0:0015405 | <1e-4 | ss10294 | G0:0000166 | 0.149  |
| s110369 | G0:0009991 | <1e-4 | s1r0291 | G0:0044255 | <1e-4 | s112015 | G0:0048519 | <1e-4 | s110846 | G0:0022838 | <1e-4 | ss10750 | G0:0000166 | 0.149  |
| s110822 | G0:0006766 | <1e-4 | s110524 | G0:0044260 | <1e-4 | s111060 | G0:0051186 | <1e-4 | s115004 | G0:0016817 | <1e-4 | s1r0818 | G0:0000166 | 0.1458 |
| sg10002 | G0:0051234 | <1e-4 | s110785 | G0:0019219 | <1e-4 | s115090 | G0:0006066 | <1e-4 | ssr6024 | G0:0015077 | <1e-4 | s111528 | G0:0000166 | 0.1458 |
| s111995 | G0:0042180 | <1e-4 | s1r1150 | G0:0006811 | <1e-4 | s110815 | G0:0022607 | <1e-4 | s1r0815 | G0:0008171 | <1e-4 | s1r1591 | G0:0000166 | 0.1458 |
| s1r0505 | G0:0010468 | <1e-4 | s1r7100 | G0:0006720 | <1e-4 | s1r1362 | G0:0006576 | <1e-4 | s1r2011 | G0:0016741 | <1e-4 | s110446 | G0:0000166 | 0.1458 |
| s111054 | G0:0016053 | <1e-4 | s1r0770 | G0:0006766 | <1e-4 | s1r1493 | G0:0009141 | <1e-4 | s111736 | G0:0043492 | <1e-4 | s1r1699 | G0:0000166 | 0.1429 |
| s1r6028 | G0:0051171 | <1e-4 | s1r1535 | G0:0050896 | <1e-4 | s1r0981 | G0:0071496 | <1e-4 | s1r6021 | G0:0015077 | <1e-4 | s110413 | G0:0000166 | 0.1429 |
| s1r0813 | G0:0051246 | <1e-4 | s110319 | G0:0016052 | <1e-4 | ss18005 | G0:0006766 | <1e-4 | s1r1223 | G0:0022890 | <1e-4 | s1r1052 | G0:0000166 | 0.1429 |
| ssr2009 | G0:0044106 | <1e-4 | s1r7095 | G0:0019752 | <1e-4 | s110096 | G0:0009142 | <1e-4 | s111372 | G0:0015405 | <1e-4 | s1r0642 | G0:0005488 | 0.1403 |
| s110703 | G0:0019751 | <1e-4 | s110066 | G0:0046907 | <1e-4 | s111773 | G0:0071496 | <1e-4 | ss17038 | G0:0016462 | <1e-4 | s110446 | G0:0005488 | 0.1403 |

|         |            |       |         |            |       |         |            |       |         |            |       |         |            |        |
|---------|------------|-------|---------|------------|-------|---------|------------|-------|---------|------------|-------|---------|------------|--------|
| s110451 | G0:0052188 | <1e-4 | s1r2084 | G0:0009059 | <1e-4 | s1r5126 | G0:0009199 | <1e-4 | s1r0092 | G0:0016817 | <1e-4 | s110656 | G0:0005488 | 0.1403 |
| s110804 | G0:0080090 | <1e-4 | s1r1767 | G0:0044255 | <1e-4 | s1r0813 | G0:0046164 | <1e-4 | s1r0769 | G0:0015077 | <1e-4 | s111995 | G0:0005488 | 0.1403 |
| s111396 | G0:0046394 | <1e-4 | s110274 | G0:0009308 | <1e-4 | s1r0345 | G0:0006576 | <1e-4 | ssr5074 | G0:0015293 | <1e-4 | s111222 | G0:0005488 | 0.1403 |
| s115047 | G0:0019637 | <1e-4 | s117067 | G0:0051179 | <1e-4 | s1r1442 | G0:0009309 | <1e-4 | s1r0545 | G0:0016462 | <1e-4 | s111446 | G0:0005488 | 0.1403 |
| ssr1256 | G0:0051179 | <1e-4 | ssl2420 | G0:0044255 | <1e-4 | ss17038 | G0:0009142 | <1e-4 | ss13451 | G0:0022836 | <1e-4 | s1r1591 | G0:0005488 | 0.1403 |
| s111130 | G0:0048523 | <1e-4 | s111372 | G0:0044003 | <1e-4 | s1r1186 | G0:0009126 | <1e-4 | s1r7082 | G0:0022857 | <1e-4 | ss12420 | G0:0005215 | 0.1398 |
| s1r1241 | G0:0006766 | <1e-4 | s1r0602 | G0:0048523 | <1e-4 | s116053 | G0:0016052 | <1e-4 | s1r2144 | G0:0022803 | <1e-4 | ssr3304 | G0:0005215 | 0.1398 |
| s110982 | G0:0009059 | <1e-4 | s1r0334 | G0:0043648 | <1e-4 | s1r8021 | G0:0009165 | <1e-4 | s110980 | G0:0043167 | <1e-4 | s1r7097 | G0:0005215 | 0.1398 |
| ss13142 | G0:0019362 | <1e-4 | ssr0759 | G0:0009124 | <1e-4 | s1r0442 | G0:0009117 | <1e-4 | s110815 | G0:0015075 | <1e-4 | s1r1315 | G0:0005215 | 0.1398 |
| s1r7094 | G0:0051186 | <1e-4 | s1r0408 | G0:0043549 | <1e-4 | s111315 | G0:0019222 | <1e-4 | s111601 | G0:0016818 | <1e-4 | s110266 | G0:0005215 | 0.1398 |
| s1r6009 | G0:0052188 | <1e-4 | s1r0913 | G0:0050794 | <1e-4 | s115109 | G0:0034654 | <1e-4 | s110853 | G0:0022838 | <1e-4 | s1r1365 | G0:0005215 | 0.1398 |
| s1r1752 | G0:0010556 | <1e-4 | s111130 | G0:0044271 | <1e-4 | ss12069 | G0:0051171 | <1e-4 | s111785 | G0:0060089 | <1e-4 | s1r7013 | G0:0005215 | 0.1398 |
| ssr6030 | G0:0031323 | <1e-4 | s1r0264 | G0:0042180 | <1e-4 | s111319 | G0:0009394 | <1e-4 | s111142 | G0:0022832 | <1e-4 | s1r1195 | G0:0005215 | 0.1398 |
| s1r1472 | G0:0009309 | <1e-4 | s110266 | G0:0051188 | <1e-4 | s1r0006 | G0:0052111 | <1e-4 | s110847 | G0:0022838 | <1e-4 | ssr2912 | G0:0005215 | 0.1398 |
| s110577 | G0:0009057 | <1e-4 | ssl7007 | G0:0009987 | <1e-4 | ss11923 | G0:0019637 | <1e-4 | s118011 | G0:0016817 | <1e-4 | s1r0049 | G0:0005215 | 0.1398 |
| s111911 | G0:0009263 | <1e-4 | ssr7079 | G0:0006811 | <1e-4 | s1r1851 | G0:0034660 | <1e-4 | s1r0510 | G0:0022892 | <1e-4 | ss13451 | G0:0005215 | 0.1398 |
| s1r1570 | G0:0046128 | <1e-4 | ssl1255 | G0:0009161 | <1e-4 | ss17039 | G0:0043933 | <1e-4 | s1r1862 | G0:0022857 | <1e-4 | s1r1547 | G0:0005215 | 0.1398 |
| s111273 | G0:0022411 | <1e-4 | s111163 | G0:0022607 | <1e-4 | s110376 | G0:0048518 | <1e-4 | s1r1577 | G0:0016817 | <1e-4 | s1r7080 | G0:0005215 | 0.1398 |
| s110752 | G0:0009141 | <1e-4 | s111632 | G0:0048523 | <1e-4 | s110047 | G0:0043436 | <1e-4 | ssr6024 | G0:0015267 | <1e-4 | s1r6039 | G0:0005215 | 0.1398 |
| ss10353 | G0:0044275 | <1e-4 | s1r1444 | G0:0044248 | <1e-4 | s1r1690 | G0:0060255 | <1e-4 | ssr1528 | G0:0022891 | <1e-4 | s110860 | G0:0005215 | 0.1398 |
| s1r6106 | G0:0019222 | <1e-4 | s1r5127 | G0:0019222 | <1e-4 | s111372 | G0:0006631 | <1e-4 | s1r5126 | G0:0003674 | <1e-4 | s1r6074 | G0:0005215 | 0.1398 |
| ss10788 | G0:0044106 | <1e-4 | s1r1288 | G0:0050896 | <1e-4 | s111307 | G0:0051171 | <1e-4 | ss17038 | G0:0015405 | <1e-4 | s111092 | G0:0005215 | 0.1398 |
| s1r1396 | G0:0009132 | <1e-4 | s1r1737 | G0:0009987 | <1e-4 | s111381 | G0:0006066 | <1e-4 | ssr1473 | G0:0022857 | <1e-4 | s1r6073 | G0:0005215 | 0.1398 |
| ss11972 | G0:0033013 | <1e-4 | s1r1914 | G0:0044282 | <1e-4 | s1r1493 | G0:0072524 | <1e-4 | ss11464 | G0:0022832 | <1e-4 | ss12471 | G0:0005215 | 0.1398 |
| s1r5111 | G0:0006733 | <1e-4 | s1r0780 | G0:0034641 | <1e-4 | s111089 | G0:0071840 | <1e-4 | s111372 | G0:0016741 | <1e-4 | s1r0598 | G0:0005215 | 0.1398 |
| s111318 | G0:0016052 | <1e-4 | s1r1327 | G0:0044283 | <1e-4 | s110497 | G0:0019219 | <1e-4 | s111400 | G0:0060089 | <1e-4 | ss15098 | G0:0005215 | 0.1398 |
| s110216 | G0:0043549 | <1e-4 | s1r5017 | G0:0031640 | <1e-4 | s1r1944 | G0:0001932 | <1e-4 | s1r0006 | G0:0022891 | <1e-4 | s1r2118 | G0:0005215 | 0.1398 |
| s111348 | G0:0072528 | <1e-4 | ss18028 | G0:0043549 | <1e-4 | s1r1074 | G0:0071842 | <1e-4 | s1r0060 | G0:0016741 | <1e-4 | s1r0142 | G0:0005215 | 0.1398 |
| s118002 | G0:0048522 | <1e-4 | s1r0702 | G0:0071841 | <1e-4 | s110354 | G0:0044283 | <1e-4 | ss10242 | G0:0022892 | <1e-4 | s110174 | G0:0005215 | 0.1398 |
| s111193 | G0:0016054 | <1e-4 | ss10461 | G0:0044282 | <1e-4 | s111095 | G0:0055086 | <1e-4 | s111715 | G0:0015405 | <1e-4 | s111414 | G0:0005215 | 0.1398 |
| s1r0601 | G0:0009056 | <1e-4 | s1r0483 | G0:0009056 | <1e-4 | s110296 | G0:0044260 | <1e-4 | s1r0619 | G0:0016818 | <1e-4 | s111921 | G0:0005215 | 0.1398 |
| s1r1069 | G0:0034641 | <1e-4 | s110172 | G0:0009123 | <1e-4 | s1r0476 | G0:0048523 | <1e-4 | s1r0498 | G0:0005342 | <1e-4 | s1r0362 | G0:0005215 | 0.1398 |
| s1r1470 | G0:0044106 | <1e-4 | s112015 | G0:0071840 | <1e-4 | ss10788 | G0:0009142 | <1e-4 | s1r5073 | G0:0015075 | <1e-4 | s111509 | G0:0005215 | 0.1398 |
| ss15103 | G0:0051171 | <1e-4 | s118033 | G0:0044003 | <1e-4 | s110499 | G0:0006631 | <1e-4 | s111735 | G0:0043167 | <1e-4 | s1r1660 | G0:0005215 | 0.1398 |
| s110372 | G0:0009309 | <1e-4 | ssr6089 | G0:0044275 | <1e-4 | s1r1557 | G0:0048878 | <1e-4 | s1r1627 | G0:0005342 | <1e-4 | s1r1223 | G0:0005215 | 0.1398 |
| s110072 | G0:0018130 | <1e-4 | ss15129 | G0:0022607 | <1e-4 | s1r1338 | G0:0055086 | <1e-4 | s111505 | G0:0043167 | <1e-4 | ssr7072 | G0:0005215 | 0.1398 |
| ss13451 | G0:0019637 | <1e-4 | s1r1262 | G0:0090304 | <1e-4 | s110048 | G0:0009987 | <1e-4 | s1r7071 | G0:0016462 | <1e-4 | ssr2422 | G0:0005215 | 0.1398 |
| s111651 | G0:0055082 | <1e-4 | s111863 | G0:0060255 | <1e-4 | s1r0553 | G0:0042451 | <1e-4 | s110198 | G0:0022890 | <1e-4 | s1r0569 | G0:0005215 | 0.1398 |
| s1r7026 | G0:0006811 | <1e-4 | s1r0689 | G0:0042180 | <1e-4 | s111225 | G0:0009991 | <1e-4 | s110047 | G0:0008171 | <1e-4 | s111757 | G0:0005215 | 0.1398 |
| ssr2201 | G0:0042180 | <1e-4 | s1r0049 | G0:0006576 | <1e-4 | sg10001 | G0:0048519 | <1e-4 | s111531 | G0:0008171 | <1e-4 | ss13142 | G0:0005215 | 0.1398 |
| s111862 | G0:0071554 | <1e-4 | s1r1081 | G0:0001932 | <1e-4 | s1r1900 | G0:0044255 | <1e-4 | s111447 | G0:0022891 | <1e-4 | sg10002 | G0:0005215 | 0.1398 |
| s111775 | G0:0009165 | <1e-4 | s1r0909 | G0:0006091 | <1e-4 | s111942 | G0:0048522 | <1e-4 | ssr7084 | G0:0022891 | <1e-4 | s1r0552 | G0:0005215 | 0.1398 |
| s1r2048 | G0:0050789 | <1e-4 | s1r1194 | G0:0019752 | <1e-4 | s1r1047 | G0:0071840 | <1e-4 | s1r1816 | G0:0022857 | <1e-4 | s111722 | G0:0005215 | 0.1398 |
| sg10001 | G0:0034660 | <1e-4 | s111509 | G0:0006811 | <1e-4 | s111318 | G0:0009987 | <1e-4 | ssr0102 | G0:0016817 | <1e-4 | s1r1068 | G0:0005215 | 0.1398 |
| s1r1535 | G0:0006163 | <1e-4 | s110751 | G0:0009892 | <1e-4 | s1r0285 | G0:0009987 | <1e-4 | s1r7081 | G0:0022836 | <1e-4 | s1r1535 | G0:0005215 | 0.1398 |
| s1r7092 | G0:0043933 | <1e-4 | s111378 | G0:0051188 | <1e-4 | s1r0770 | G0:0051716 | <1e-4 | s110508 | G0:0015267 | <1e-4 | s117066 | G0:0005215 | 0.1398 |
| s1r1169 | G0:0051246 | <1e-4 | s111461 | G0:0042180 | <1e-4 | s1r0613 | G0:0044248 | <1e-4 | ssr6086 | G0:0022890 | <1e-4 | s1r1600 | G0:0005215 | 0.1398 |
| s110147 | G0:0048878 | <1e-4 | s111675 | G0:0043436 | <1e-4 | s1r0146 | G0:0055082 | <1e-4 | ss13692 | G0:0016817 | <1e-4 | s1r6072 | G0:0005215 | 0.1398 |
| s1r1660 | G0:0050794 | <1e-4 | s110760 | G0:0051186 | <1e-4 | s110443 | G0:0071554 | <1e-4 | s110174 | G0:0015399 | <1e-4 | s115061 | G0:0005215 | 0.1398 |
| s1r0962 | G0:0051186 | <1e-4 | s1r1591 | G0:0050801 | <1e-4 | s1r0845 | G0:0009059 | <1e-4 | s111834 | G0:0022803 | <1e-4 | s1r1103 | G0:0005215 | 0.1398 |
| s1r0941 | G0:0009987 | <1e-4 | s111613 | G0:0043648 | <1e-4 | s111738 | G0:0051234 | <1e-4 | s1r1568 | G0:0016741 | <1e-4 | s111160 | G0:0005215 | 0.1398 |
| s111613 | G0:0043933 | <1e-4 | s1r0144 | G0:0051716 | <1e-4 | s110788 | G0:0006091 | <1e-4 | ssr2067 | G0:0008171 | <1e-4 | s1r0092 | G0:0005215 | 0.1398 |
| s1r0196 | G0:0051818 | <1e-4 | s1r0104 | G0:0031323 | <1e-4 | s110565 | G0:0052188 | <1e-4 | s1r0232 | G0:0003674 | <1e-4 | s110727 | G0:0005215 | 0.1398 |
| s1r0442 | G0:0051716 | <1e-4 | s1r1263 | G0:0044003 | <1e-4 | s1r1097 | G0:0006766 | <1e-4 | s110183 | G0:0016746 | <1e-4 | s110872 | G0:0005215 | 0.1398 |



|          |            |       |          |            |       |          |            |       |          |            |       |          |            |        |
|----------|------------|-------|----------|------------|-------|----------|------------|-------|----------|------------|-------|----------|------------|--------|
| ssl0739  | G0:0034660 | <1e-4 | ssl5129  | G0:0042455 | <1e-4 | sll1512  | G0:0006811 | <1e-4 | sll0488  | G0:0015405 | <1e-4 | slr1468  | G0:0005215 | 0.1398 |
| slr1083  | G0:0042451 | <1e-4 | sll0024  | G0:0055082 | <1e-4 | sll1902  | G0:0051347 | <1e-4 | slr8022  | G0:0015075 | <1e-4 | sll0444  | G0:0005215 | 0.1398 |
| slr1362  | G0:0060255 | <1e-4 | ssl5015  | G0:0048878 | <1e-4 | sll11004 | G0:0016052 | <1e-4 | slr1923  | G0:0022892 | <1e-4 | slr1261  | G0:0005215 | 0.1398 |
| sll16054 | G0:0019637 | <1e-4 | slr0650  | G0:0006793 | <1e-4 | sll17065 | G0:0045184 | <1e-4 | sll10274 | G0:0016817 | <1e-4 | slr0971  | G0:0005215 | 0.1398 |
| slr0334  | G0:0072521 | <1e-4 | sll18035 | G0:0045184 | <1e-4 | slr6065  | G0:0009144 | <1e-4 | sll10359 | G0:0043492 | <1e-4 | slr1619  | G0:0005215 | 0.1398 |
| slr1081  | G0:0010468 | <1e-4 | sll1611  | G0:0009892 | <1e-4 | slr1413  | G0:0022411 | <1e-4 | slr1681  | G0:0016817 | <1e-4 | slr7012  | G0:0005215 | 0.1398 |
| slr1541  | G0:0009259 | <1e-4 | slr6044  | G0:0043436 | <1e-4 | sll11355 | G0:0034641 | <1e-4 | sll10933 | G0:0022832 | <1e-4 | slr1753  | G0:0005215 | 0.1398 |
| slr1104  | G0:0019637 | <1e-4 | slr5111  | G0:0033013 | <1e-4 | ssl0750  | G0:0006163 | <1e-4 | slr1940  | G0:0015267 | <1e-4 | slr0151  | G0:0005215 | 0.1398 |
| ssr2554  | G0:0006220 | <1e-4 | sll18019 | G0:0010556 | <1e-4 | sll10400 | G0:0009260 | <1e-4 | slr7011  | G0:0022890 | <1e-4 | slr1464  | G0:0005215 | 0.1398 |
| sll10293 | G0:0048522 | <1e-4 | slr1104  | G0:0051347 | <1e-4 | ssr6002  | G0:0044255 | <1e-4 | slr5112  | G0:0003674 | <1e-4 | sll10518 | G0:0005215 | 0.1398 |
| slr6087  | G0:0042455 | <1e-4 | slr0151  | G0:0019222 | <1e-4 | ssr3467  | G0:0043933 | <1e-4 | slr0668  | G0:0016741 | <1e-4 | sll11461 | G0:0005215 | 0.1398 |
| sll11304 | G0:0009150 | <1e-4 | sll12013 | G0:0009056 | <1e-4 | sll10786 | G0:0009987 | <1e-4 | sll11086 | G0:0015399 | <1e-4 | slr7081  | G0:0005215 | 0.1398 |
| slr0366  | G0:0009142 | <1e-4 | slr0241  | G0:0071496 | <1e-4 | sll10047 | G0:0019222 | <1e-4 | sll11388 | G0:0016746 | <1e-4 | slr1116  | G0:0005215 | 0.1398 |
| sll10451 | G0:0048518 | <1e-4 | ssr2711  | G0:0051818 | <1e-4 | slr1618  | G0:0033013 | <1e-4 | slr0082  | G0:0022803 | <1e-4 | slr1339  | G0:0005215 | 0.1398 |
| ssl1918  | G0:0042451 | <1e-4 | slr0914  | G0:0051716 | <1e-4 | sll10445 | G0:0045184 | <1e-4 | slr0812  | G0:0022838 | <1e-4 | sll10406 | G0:0005215 | 0.1398 |
| slr0262  | G0:0051186 | <1e-4 | sgl0002  | G0:0006811 | <1e-4 | slr0981  | G0:0019751 | <1e-4 | ssr2912  | G0:0022892 | <1e-4 | slr1566  | G0:0005215 | 0.1398 |
| slr1800  | G0:0008150 | <1e-4 | slr0195  | G0:0043170 | <1e-4 | sll11573 | G0:0009059 | <1e-4 | slr6091  | G0:0005342 | <1e-4 | sll10930 | G0:0005215 | 0.1398 |
| sll11002 | G0:0009117 | <1e-4 | sll10446 | G0:0009308 | <1e-4 | sll10736 | G0:0048522 | <1e-4 | sll11532 | G0:0022836 | <1e-4 | slr0196  | G0:0005215 | 0.1398 |
| sll10499 | G0:0009987 | <1e-4 | ssl10352 | G0:0019637 | <1e-4 | ssr2060  | G0:0009141 | <1e-4 | slr1263  | G0:0016746 | <1e-4 | sll11735 | G0:0005215 | 0.1398 |
| sll10268 | G0:0019752 | <1e-4 | slr1576  | G0:0019362 | <1e-4 | slr1415  | G0:0009987 | <1e-4 | slr1177  | G0:0015075 | <1e-4 | sll10218 | G0:0005215 | 0.1398 |
| sll11201 | G0:0006733 | <1e-4 | sll10905 | G0:0043549 | <1e-4 | slr1195  | G0:0009889 | <1e-4 | ssr3572  | G0:0060089 | <1e-4 | sll15034 | G0:0005215 | 0.1398 |
| slr0976  | G0:0009892 | <1e-4 | slr1150  | G0:0052111 | <1e-4 | sll10174 | G0:0046128 | <1e-4 | slr1150  | G0:0005342 | <1e-4 | sll11691 | G0:0005215 | 0.1398 |
| slr1150  | G0:0006721 | <1e-4 | slr1667  | G0:0006576 | <1e-4 | slr0709  | G0:0019752 | <1e-4 | slr1998  | G0:0022891 | <1e-4 | sll11123 | G0:0005215 | 0.1398 |
| sll15004 | G0:0042180 | <1e-4 | slr1195  | G0:0006721 | <1e-4 | slr0380  | G0:0050794 | <1e-4 | slr6006  | G0:0016817 | <1e-4 | sll11132 | G0:0005215 | 0.1398 |
| slr0148  | G0:0009141 | <1e-4 | sll17062 | G0:0008150 | <1e-4 | ssl2595  | G0:0048518 | <1e-4 | sll10982 | G0:0005342 | <1e-4 | sll17043 | G0:0005215 | 0.1398 |
| sll10394 | G0:0044282 | <1e-4 | slr5073  | G0:0006091 | <1e-4 | slr1142  | G0:0043549 | <1e-4 | sll11119 | G0:0060089 | <1e-4 | sll11960 | G0:0005215 | 0.1398 |
| sll10487 | G0:0009124 | <1e-4 | slr6006  | G0:0051234 | <1e-4 | sll11691 | G0:0071496 | <1e-4 | ss12420  | G0:0022892 | <1e-4 | ssr1951  | G0:0005215 | 0.1398 |
| ssr5019  | G0:0055114 | <1e-4 | sll15028 | G0:0010556 | <1e-4 | slr1353  | G0:0045184 | <1e-4 | sll11640 | G0:0022838 | <1e-4 | slr1957  | G0:0005215 | 0.1398 |
| sll11979 | G0:0051171 | <1e-4 | sll11934 | G0:0006163 | <1e-4 | slr1142  | G0:0051347 | <1e-4 | slr1990  | G0:0015291 | <1e-4 | sll10857 | G0:0005215 | 0.1398 |
| sll10787 | G0:0034641 | <1e-4 | slr1362  | G0:0034641 | <1e-4 | sll11717 | G0:0048518 | <1e-4 | sll11659 | G0:0043167 | <1e-4 | slr6100  | G0:0005215 | 0.1398 |
| sll10676 | G0:0051179 | <1e-4 | sll11131 | G0:0009893 | <1e-4 | slr1854  | G0:0006720 | <1e-4 | sll10837 | G0:0005342 | <1e-4 | ssr6079  | G0:0005215 | 0.1398 |
| slr1104  | G0:0044260 | <1e-4 | slr7060  | G0:0006091 | <1e-4 | sll11222 | G0:0042180 | <1e-4 | slr5101  | G0:0015405 | <1e-4 | sll11053 | G0:0005215 | 0.1398 |
| sll10543 | G0:0009123 | <1e-4 | slr1854  | G0:0009260 | <1e-4 | slr1811  | G0:0051234 | <1e-4 | slr5012  | G0:0016818 | <1e-4 | sll11485 | G0:0005215 | 0.1398 |
| sll10085 | G0:0044248 | <1e-4 | ssr2142  | G0:0009123 | <1e-4 | slr1437  | G0:0072524 | <1e-4 | sll10405 | G0:0016817 | <1e-4 | slr0592  | G0:0005215 | 0.1398 |
| slr0179  | G0:0009161 | <1e-4 | slr0742  | G0:0080090 | <1e-4 | slr6094  | G0:0009144 | <1e-4 | slr0784  | G0:0022803 | <1e-4 | slr0655  | G0:0005215 | 0.1398 |
| ssl18003 | G0:0044255 | <1e-4 | ssr2754  | G0:0072522 | <1e-4 | slr0801  | G0:0034654 | <1e-4 | ssr1391  | G0:0022832 | <1e-4 | slr1419  | G0:0005215 | 0.1398 |
| slr1429  | G0:0046164 | <1e-4 | ssr6026  | G0:0009987 | <1e-4 | sll11476 | G0:0051246 | <1e-4 | slr5053  | G0:0022832 | <1e-4 | slr7098  | G0:0005215 | 0.1398 |
| sll15109 | G0:0051716 | <1e-4 | ssl5008  | G0:0009132 | <1e-4 | sll11024 | G0:0050801 | <1e-4 | slr1417  | G0:0015399 | <1e-4 | sll10448 | G0:0005215 | 0.1398 |
| sll11717 | G0:0019362 | <1e-4 | sll11289 | G0:0009123 | <1e-4 | slr0610  | G0:0006091 | <1e-4 | sll10532 | G0:0016462 | <1e-4 | sll10369 | G0:0005215 | 0.1398 |
| slr1636  | G0:0048522 | <1e-4 | slr1507  | G0:0071842 | <1e-4 | slr2110  | G0:0034654 | <1e-4 | ss12065  | G0:0016817 | <1e-4 | sll10710 | G0:0005215 | 0.1398 |
| slr0589  | G0:0043436 | <1e-4 | ssl17045 | G0:0031640 | <1e-4 | slr1906  | G0:0006753 | <1e-4 | slr1236  | G0:0016817 | <1e-4 | ssr2611  | G0:0005215 | 0.1398 |
| slr1816  | G0:0046394 | <1e-4 | sll10301 | G0:0006793 | <1e-4 | slr0184  | G0:0071842 | <1e-4 | ss12245  | G0:0043167 | <1e-4 | slr1470  | G0:0005215 | 0.1398 |
| sll11913 | G0:0006631 | <1e-4 | slr6065  | G0:0072524 | <1e-4 | slr1353  | G0:0009132 | <1e-4 | sll17006 | G0:0015075 | <1e-4 | sll11062 | G0:0005215 | 0.1398 |
| sll11068 | G0:0034654 | <1e-4 | slr0609  | G0:0044260 | <1e-4 | slr0400  | G0:0046394 | <1e-4 | sll10007 | G0:0022892 | <1e-4 | slr1069  | G0:0005215 | 0.1398 |
| slr1780  | G0:0043549 | <1e-4 | sll11714 | G0:0071841 | <1e-4 | sll10280 | G0:0006793 | <1e-4 | sll10436 | G0:0043167 | <1e-4 | slr0146  | G0:0005215 | 0.1398 |
| slr0787  | G0:0009893 | <1e-4 | slr1614  | G0:0009991 | <1e-4 | sll10412 | G0:0051347 | <1e-4 | slr5087  | G0:0008171 | <1e-4 | slr0890  | G0:0005215 | 0.1398 |
| sll17033 | G0:0009892 | <1e-4 | sll10216 | G0:0044281 | <1e-4 | ssr1425  | G0:0009144 | <1e-4 | ss13383  | G0:0022803 | <1e-4 | sll11004 | G0:0005215 | 0.1398 |
| slr7025  | G0:0051186 | <1e-4 | slr1276  | G0:0009893 | <1e-4 | sll11531 | G0:0042180 | <1e-4 | slr0605  | G0:0015291 | <1e-4 | slr1303  | G0:0005215 | 0.1393 |
| ssr0692  | G0:0045184 | <1e-4 | ssr7036  | G0:0010556 | <1e-4 | slr1472  | G0:0033013 | <1e-4 | slr2060  | G0:0043492 | <1e-4 | slr1415  | G0:0005215 | 0.1393 |
| sll10168 | G0:0051171 | <1e-4 | slr0144  | G0:0009987 | <1e-4 | sll10595 | G0:0051234 | <1e-4 | slr5127  | G0:0022892 | <1e-4 | slr0249  | G0:0005215 | 0.1393 |
| slr0483  | G0:0009893 | <1e-4 | ssr3300  | G0:0048522 | <1e-4 | sll10208 | G0:0051818 | <1e-4 | sll17050 | G0:0016741 | <1e-4 | slr1053  | G0:0005215 | 0.1393 |
| sll10412 | G0:0051179 | <1e-4 | slr7099  | G0:0019752 | <1e-4 | sll10749 | G0:0008150 | <1e-4 | slr1600  | G0:0022803 | <1e-4 | slr1070  | G0:0005215 | 0.1393 |
| sll11736 | G0:0009893 | <1e-4 | sll11132 | G0:0052111 | <1e-4 | ssl2148  | G0:0065007 | <1e-4 | sll10670 | G0:0022892 | <1e-4 | sll10564 | G0:0005215 | 0.1393 |
| sll11158 | G0:0065007 | <1e-4 | sll11934 | G0:0071842 | <1e-4 | slr2018  | G0:0009124 | <1e-4 | sll10185 | G0:0022832 | <1e-4 | slr1062  | G0:0005215 | 0.1393 |

|         |            |       |         |            |       |         |            |       |         |            |       |         |            |        |
|---------|------------|-------|---------|------------|-------|---------|------------|-------|---------|------------|-------|---------|------------|--------|
| ssr5019 | G0:0072524 | <1e-4 | slr1998 | G0:0071841 | <1e-4 | slr0770 | G0:0009308 | <1e-4 | slr1944 | G0:0015267 | <1e-4 | slr0169 | G0:0005215 | 0.1393 |
| slr0702 | G0:0060255 | <1e-4 | sl10172 | G0:0080090 | <1e-4 | slr1391 | G0:0044248 | <1e-4 | slr0195 | G0:0043492 | <1e-4 | slr0664 | G0:0005215 | 0.1393 |
| sl11761 | G0:0009141 | <1e-4 | slr0480 | G0:0050801 | <1e-4 | sl10508 | G0:0001932 | <1e-4 | ssl2971 | G0:0022832 | <1e-4 | slr1977 | G0:0005215 | 0.1393 |
| slr1636 | G0:0009116 | <1e-4 | slr0740 | G0:0006576 | <1e-4 | ssl2595 | G0:0080090 | <1e-4 | sl11511 | G0:0022832 | <1e-4 | slr0729 | G0:0005215 | 0.1393 |
| sl11912 | G0:0018130 | <1e-4 | slr0294 | G0:0051234 | <1e-4 | slr7016 | G0:0042451 | <1e-4 | sl10448 | G0:0003674 | <1e-4 | slr0456 | G0:0005215 | 0.1393 |
| slr0816 | G0:0046164 | <1e-4 | sl17055 | G0:0009165 | <1e-4 | slr0602 | G0:0044283 | <1e-4 | slr6072 | G0:0008171 | <1e-4 | sl10585 | G0:0005215 | 0.1393 |
| sl18033 | G0:0009117 | <1e-4 | slr1441 | G0:0009057 | <1e-4 | ss10738 | G0:0048523 | <1e-4 | sl11188 | G0:0043167 | <1e-4 | slr0172 | G0:0005215 | 0.1393 |
| sl11949 | G0:0009161 | <1e-4 | slr1066 | G0:0051716 | <1e-4 | sl11251 | G0:0043412 | <1e-4 | sl11289 | G0:0022836 | <1e-4 | ssr1552 | G0:0005215 | 0.1393 |
| sl10410 | G0:0071554 | <1e-4 | slr1534 | G0:0048522 | <1e-4 | slr2111 | G0:0042455 | <1e-4 | sl17067 | G0:0015291 | <1e-4 | slr0060 | G0:0005215 | 0.1393 |
| slr6028 | G0:0060255 | <1e-4 | slr0172 | G0:0042451 | <1e-4 | slr0092 | G0:0006721 | <1e-4 | sl11411 | G0:0005342 | <1e-4 | slr1590 | G0:0005215 | 0.1393 |
| slr1033 | G0:0042180 | <1e-4 | sl11173 | G0:0048522 | <1e-4 | sl10263 | G0:0034641 | <1e-4 | slr0815 | G0:0022890 | <1e-4 | ss10483 | G0:0005215 | 0.1393 |
| slr6103 | G0:0051234 | <1e-4 | slr1956 | G0:0009199 | <1e-4 | sl10157 | G0:0043933 | <1e-4 | sl11940 | G0:0016817 | <1e-4 | sl10685 | G0:0005215 | 0.1393 |
| ssr2009 | G0:0006066 | <1e-4 | slr1230 | G0:0031323 | <1e-4 | slr1900 | G0:0016052 | <1e-4 | slr0082 | G0:0022891 | <1e-4 | slr7024 | G0:0005215 | 0.1393 |
| sl10577 | G0:0009199 | <1e-4 | ssl3142 | G0:0048518 | <1e-4 | slr1544 | G0:0044003 | <1e-4 | slr2101 | G0:0042623 | <1e-4 | ssr2754 | G0:0005215 | 0.1393 |
| slr0476 | G0:0071840 | <1e-4 | slr0285 | G0:0006753 | <1e-4 | slr1789 | G0:0043933 | <1e-4 | sl10063 | G0:0022890 | <1e-4 | sl11873 | G0:0005215 | 0.1393 |
| sl11273 | G0:0044282 | <1e-4 | slr0400 | G0:0034654 | <1e-4 | sl10659 | G0:0072522 | <1e-4 | slr1612 | G0:0005342 | <1e-4 | slr1259 | G0:0005215 | 0.1393 |
| slr0592 | G0:0031323 | <1e-4 | slr1209 | G0:0009394 | <1e-4 | ssr6048 | G0:0008150 | <1e-4 | ssr1765 | G0:0060089 | <1e-4 | slr2125 | G0:0005215 | 0.1393 |
| slr1187 | G0:0072528 | <1e-4 | sl10448 | G0:0044282 | <1e-4 | slr1116 | G0:0051234 | <1e-4 | ss18008 | G0:0016462 | <1e-4 | sl11021 | G0:0005215 | 0.1393 |
| sl11068 | G0:0051246 | <1e-4 | ssl7038 | G0:0009987 | <1e-4 | ssl1255 | G0:0009165 | <1e-4 | sl11692 | G0:0016818 | <1e-4 | sl10614 | G0:0005215 | 0.1393 |
| sl11512 | G0:0046164 | <1e-4 | slr0655 | G0:0019752 | <1e-4 | sl11681 | G0:0072528 | <1e-4 | sl11164 | G0:0043167 | <1e-4 | slr1288 | G0:0005215 | 0.1393 |
| sl17050 | G0:0048523 | <1e-4 | slr0708 | G0:0006082 | <1e-4 | sl10602 | G0:0009056 | <1e-4 | slr0634 | G0:0016817 | <1e-4 | slr1169 | G0:0005215 | 0.1393 |
| sl11671 | G0:0048518 | <1e-4 | ssl7022 | G0:0019222 | <1e-4 | sl10623 | G0:0048878 | <1e-4 | slr1593 | G0:0043492 | <1e-4 | slr0789 | G0:0005215 | 0.1393 |
| slr6064 | G0:0019219 | <1e-4 | slr1778 | G0:0072522 | <1e-4 | slr0516 | G0:0043170 | <1e-4 | sl11563 | G0:0016746 | <1e-4 | sl10281 | G0:0005215 | 0.1393 |
| sl15062 | G0:0072524 | <1e-4 | sl11054 | G0:0051179 | <1e-4 | slr0196 | G0:0019752 | <1e-4 | sl11123 | G0:0043492 | <1e-4 | sl11938 | G0:0005215 | 0.1393 |
| sl10996 | G0:0042180 | <1e-4 | sl11979 | G0:0022607 | <1e-4 | slr0699 | G0:0009889 | <1e-4 | ssr2755 | G0:0016817 | <1e-4 | slr1690 | G0:0005215 | 0.1393 |
| slr0082 | G0:0046128 | <1e-4 | sl11262 | G0:0006220 | <1e-4 | ssr1528 | G0:0009987 | <1e-4 | slr0872 | G0:0015267 | <1e-4 | slr0887 | G0:0005215 | 0.1393 |
| sl11461 | G0:0043549 | <1e-4 | slr0689 | G0:0044106 | <1e-4 | slr1568 | G0:0006811 | <1e-4 | slr0962 | G0:0022803 | <1e-4 | sl10787 | G0:0005215 | 0.1393 |
| slr1533 | G0:0051716 | <1e-4 | slr6028 | G0:0065007 | <1e-4 | sl10982 | G0:0006066 | <1e-4 | sl10319 | G0:0016817 | <1e-4 | slr1074 | G0:0005215 | 0.1393 |
| slr0453 | G0:0043170 | <1e-4 | slr0668 | G0:0033013 | <1e-4 | sl10596 | G0:0016054 | <1e-4 | slr1398 | G0:0016741 | <1e-4 | sl10297 | G0:0005215 | 0.1393 |
| slr0065 | G0:0009987 | <1e-4 | slr0262 | G0:0043412 | <1e-4 | slr6103 | G0:0050789 | <1e-4 | slr0596 | G0:0022892 | <1e-4 | ssr1114 | G0:0005215 | 0.1393 |
| slr1442 | G0:0009056 | <1e-4 | slr0728 | G0:0022607 | <1e-4 | slr7010 | G0:0009309 | <1e-4 | ssr6027 | G0:0043167 | <1e-4 | sl10911 | G0:0005215 | 0.1393 |
| ssl3379 | G0:0019222 | <1e-4 | slr5127 | G0:0044255 | <1e-4 | slr1307 | G0:0071554 | <1e-4 | sl11348 | G0:0015291 | <1e-4 | sl10861 | G0:0005488 | 0.1366 |
| slr1505 | G0:0006732 | <1e-4 | sl11446 | G0:0022411 | <1e-4 | ssr6019 | G0:0052188 | <1e-4 | sl10369 | G0:0060089 | <1e-4 | sl10602 | G0:0016787 | 0.1361 |
| sl10354 | G0:0046164 | <1e-4 | slr1668 | G0:0009394 | <1e-4 | sl11109 | G0:0019751 | <1e-4 | sl10069 | G0:0015405 | <1e-4 | slr0935 | G0:0016787 | 0.1361 |
| slr1307 | G0:0071840 | <1e-4 | slr1762 | G0:0006732 | <1e-4 | sl10413 | G0:0071554 | <1e-4 | sl10641 | G0:0008171 | <1e-4 | sl11241 | G0:0016787 | 0.1361 |
| sl11866 | G0:0044275 | <1e-4 | slr0554 | G0:0034654 | <1e-4 | slr0380 | G0:0009263 | <1e-4 | slr1110 | G0:0015405 | <1e-4 | slr1541 | G0:0016787 | 0.1361 |
| sl10788 | G0:0071842 | <1e-4 | ssr2318 | G0:0050789 | <1e-4 | slr7058 | G0:0009991 | <1e-4 | sl11832 | G0:0043492 | <1e-4 | slr1413 | G0:0016787 | 0.1361 |
| sl11527 | G0:0009262 | <1e-4 | sl11526 | G0:0006720 | <1e-4 | sl10381 | G0:0006811 | <1e-4 | sl11024 | G0:0022836 | <1e-4 | slr0172 | G0:0016787 | 0.1361 |
| slr0770 | G0:0019362 | <1e-4 | ssl5031 | G0:0006733 | <1e-4 | slr2000 | G0:0071840 | <1e-4 | sl10735 | G0:0016741 | <1e-4 | sl11659 | G0:0016787 | 0.1361 |
| sl10098 | G0:0048523 | <1e-4 | slr0393 | G0:0009893 | <1e-4 | slr1799 | G0:0051179 | <1e-4 | sl11766 | G0:0016462 | <1e-4 | slr2115 | G0:0016787 | 0.1361 |
| ssr0692 | G0:0044260 | <1e-4 | slr1875 | G0:0034660 | <1e-4 | slr2027 | G0:0071840 | <1e-4 | slr2052 | G0:0022832 | <1e-4 | sl11873 | G0:0016787 | 0.1361 |
| slr0588 | G0:0019222 | <1e-4 | sl18002 | G0:0006766 | <1e-4 | ssl2471 | G0:0048878 | <1e-4 | sl11350 | G0:0022803 | <1e-4 | sl11240 | G0:0016787 | 0.1361 |
| sl15063 | G0:0019752 | <1e-4 | sl11476 | G0:0048518 | <1e-4 | slr1122 | G0:0044255 | <1e-4 | sl11390 | G0:0022838 | <1e-4 | ssr1114 | G0:0016787 | 0.1361 |
| slr0249 | G0:0050896 | <1e-4 | slr0816 | G0:0046483 | <1e-4 | sl11390 | G0:0050789 | <1e-4 | slr0978 | G0:0022857 | <1e-4 | sl10319 | G0:0016787 | 0.1361 |
| sl10499 | G0:0071842 | <1e-4 | slr1290 | G0:0009141 | <1e-4 | sl11250 | G0:0071841 | <1e-4 | slr5053 | G0:0015075 | <1e-4 | sl10281 | G0:0016787 | 0.1361 |
| slr1935 | G0:0046907 | <1e-4 | ssl5095 | G0:0042180 | <1e-4 | sl15062 | G0:0043170 | <1e-4 | slr6028 | G0:0015267 | <1e-4 | sl11352 | G0:0016787 | 0.1361 |
| sl15026 | G0:0009142 | <1e-4 | sl11761 | G0:0043170 | <1e-4 | sl15062 | G0:0006066 | <1e-4 | sl10756 | G0:0016746 | <1e-4 | slr0249 | G0:0016787 | 0.1361 |
| sl11608 | G0:0016054 | <1e-4 | slr0592 | G0:0051246 | <1e-4 | slr0907 | G0:0009144 | <1e-4 | sl11898 | G0:0022803 | <1e-4 | slr0232 | G0:0016787 | 0.1361 |
| sl11769 | G0:0031640 | <1e-4 | ssl3291 | G0:0071842 | <1e-4 | sl11979 | G0:0044260 | <1e-4 | slr1690 | G0:0022838 | <1e-4 | slr1690 | G0:0016787 | 0.1361 |
| ssl2245 | G0:0001932 | <1e-4 | slr6004 | G0:0034654 | <1e-4 | sl10263 | G0:0050789 | <1e-4 | sl10216 | G0:0022857 | <1e-4 | slr1152 | G0:0016787 | 0.1361 |
| ssl0467 | G0:0044255 | <1e-4 | slr1819 | G0:0022607 | <1e-4 | slr1209 | G0:0009259 | <1e-4 | ssr3410 | G0:0022832 | <1e-4 | sl11730 | G0:0016787 | 0.1361 |
| slr1073 | G0:0044275 | <1e-4 | slr0689 | G0:0009144 | <1e-4 | sl11938 | G0:0019637 | <1e-4 | slr6088 | G0:0005342 | <1e-4 | sl10590 | G0:0016787 | 0.1361 |
| sl10867 | G0:0009893 | <1e-4 | ssl0294 | G0:0018130 | <1e-4 | slr5118 | G0:0006793 | <1e-4 | slr7057 | G0:0022838 | <1e-4 | slr0924 | G0:0016787 | 0.1361 |
| sl11954 | G0:0008150 | <1e-4 | slr1143 | G0:0009262 | <1e-4 | sl10811 | G0:0006766 | <1e-4 | slr1704 | G0:0060089 | <1e-4 | slr1852 | G0:0016787 | 0.1361 |

ssr6019 G0:0008150 <1e-4 s111913 G0:0044260 <1e-4 slr2011 G0:0055114 <1e-4 s110518 G0:0060089 <1e-4 ss13382 G0:0016787 0.1361  
slr0249 G0:0048518 <1e-4 ssr2962 G0:0071554 <1e-4 s110577 G0:0034641 <1e-4 slr5087 G0:0022836 <1e-4 slr0654 G0:0016787 0.1361  
s110702 G0:0044275 <1e-4 s110238 G0:0071841 <1e-4 ssr2962 G0:0016054 <1e-4 s110751 G0:0016818 <1e-4 ss18008 G0:0016787 0.1361  
slr7015 G0:0019752 <1e-4 ss12138 G0:0051716 <1e-4 s111352 G0:0009059 <1e-4 slr0456 G0:0008171 <1e-4 s111251 G0:0016787 0.1361  
slr1915 G0:0052111 <1e-4 s111251 G0:0044281 <1e-4 slr0598 G0:0009141 <1e-4 slr1103 G0:0022857 <1e-4 slr1287 G0:0016787 0.1361  
ss12471 G0:0008150 <1e-4 slr6094 G0:0072527 <1e-4 ssr2611 G0:0055082 <1e-4 slr0740 G0:0022832 <1e-4 slr0104 G0:0016787 0.1361  
ssr6089 G0:0043549 <1e-4 slr1773 G0:0052111 <1e-4 slr1880 G0:0046164 <1e-4 ss15113 G0:0022832 <1e-4 s111170 G0:0016787 0.1361  
slr1363 G0:0009150 <1e-4 ssr8047 G0:0031323 <1e-4 slr0397 G0:0043436 <1e-4 slr1196 G0:0015077 <1e-4 ssr1552 G0:0016787 0.1361  
s111950 G0:0042455 <1e-4 ssr3409 G0:0006163 <1e-4 s115047 G0:0006091 <1e-4 s110565 G0:0016818 <1e-4 slr0650 G0:0016787 0.1361  
ssr6086 G0:0022607 <1e-4 slr1601 G0:0050896 <1e-4 s117063 G0:0019362 <1e-4 ss12920 G0:0042623 <1e-4 s110911 G0:0016787 0.1361  
s111155 G0:0034654 <1e-4 ssr3570 G0:0009165 <1e-4 slr0313 G0:0044248 <1e-4 slr0909 G0:0016818 <1e-4 s110268 G0:0016787 0.1361  
slr0168 G0:0006631 <1e-4 s110410 G0:0044248 <1e-4 slr0144 G0:0009260 <1e-4 slr2038 G0:0022803 <1e-4 slr1895 G0:0016787 0.1361  
s117078 G0:0009142 <1e-4 s110615 G0:0009309 <1e-4 s110487 G0:0050794 <1e-4 slr7096 G0:0022838 <1e-4 slr1590 G0:0016787 0.1361  
slr1394 G0:0072527 <1e-4 s111926 G0:0055086 <1e-4 slr0610 G0:0009263 <1e-4 slr0360 G0:0016818 <1e-4 slr0742 G0:0016787 0.1361  
s111979 G0:0009892 <1e-4 s111092 G0:0009893 <1e-4 slr1800 G0:0044271 <1e-4 slr0645 G0:0043492 <1e-4 s110740 G0:0016787 0.1361  
s110149 G0:0009141 <1e-4 s110309 G0:0009199 <1e-4 slr1215 G0:0009259 <1e-4 s110994 G0:0015291 <1e-4 s111304 G0:0016787 0.1361  
s111025 G0:0009142 <1e-4 s112007 G0:0046128 <1e-4 s111765 G0:0006720 <1e-4 s110419 G0:0022890 <1e-4 slr0169 G0:0016787 0.1361  
s110189 G0:0009260 <1e-4 s111979 G0:0010556 <1e-4 ss12595 G0:0052111 <1e-4 s110405 G0:0022832 <1e-4 s110449 G0:0016787 0.1361  
s115132 G0:0009059 <1e-4 ssr2333 G0:0006753 <1e-4 s110265 G0:0044003 <1e-4 slr2018 G0:0042623 <1e-4 slr1070 G0:0016787 0.1361  
s110282 G0:0009991 <1e-4 slr7024 G0:0006220 <1e-4 slr0594 G0:0009124 <1e-4 s111036 G0:0060089 <1e-4 ssr2754 G0:0016787 0.1361  
s117030 G0:0051186 <1e-4 s111884 G0:0072527 <1e-4 s111267 G0:0044260 <1e-4 s110436 G0:0015399 <1e-4 s110539 G0:0016787 0.1361  
ssr2201 G0:0044003 <1e-4 ssr1375 G0:0051171 <1e-4 ssr3570 G0:0051171 <1e-4 s111072 G0:0015399 <1e-4 s111541 G0:0016787 0.1361  
ssr2047 G0:0033013 <1e-4 s111188 G0:0071840 <1e-4 slr0468 G0:0080090 <1e-4 slr1207 G0:0016741 <1e-4 s110688 G0:0016787 0.1361  
slr0723 G0:0046394 <1e-4 s117077 G0:0006091 <1e-4 slr0689 G0:0051171 <1e-4 slr1095 G0:0016818 <1e-4 slr0112 G0:0016787 0.1361  
s111071 G0:0009117 <1e-4 ssr6083 G0:0072521 <1e-4 slr6100 G0:0009144 <1e-4 slr1699 G0:0060089 <1e-4 slr1647 G0:0016787 0.1361  
slr1875 G0:0006733 <1e-4 s117062 G0:0019222 <1e-4 slr0962 G0:0044003 <1e-4 slr5087 G0:0022857 <1e-4 s110141 G0:0016787 0.1361  
ss15015 G0:0006811 <1e-4 s111307 G0:0009124 <1e-4 ssr0332 G0:0001932 <1e-4 slr1611 G0:0022857 <1e-4 s111054 G0:0016787 0.1361  
slr1959 G0:0018130 <1e-4 ss13829 G0:0009123 <1e-4 slr0517 G0:0034641 <1e-4 s115044 G0:0016818 <1e-4 s111505 G0:0016787 0.1361  
s110096 G0:0072521 <1e-4 slr0039 G0:0072521 <1e-4 slr1307 G0:0010468 <1e-4 slr0103 G0:0022836 <1e-4 slr1074 G0:0016787 0.1361  
s111469 G0:0006091 <1e-4 ssr0657 G0:0009056 <1e-4 slr2038 G0:0019222 <1e-4 s110225 G0:0022836 <1e-4 s110752 G0:0016787 0.1361  
s111504 G0:0031640 <1e-4 slr1161 G0:0009132 <1e-4 s111446 G0:0034654 <1e-4 slr1576 G0:0022803 <1e-4 slr0053 G0:0016787 0.1361  
slr1600 G0:0048523 <1e-4 slr7092 G0:0046128 <1e-4 slr1442 G0:0009987 <1e-4 s110913 G0:0015267 <1e-4 slr1809 G0:0016787 0.1361  
s115062 G0:0016052 <1e-4 slr6065 G0:0031640 <1e-4 slr1183 G0:0031640 <1e-4 slr0605 G0:0022832 <1e-4 slr0483 G0:0016787 0.1361  
slr0587 G0:0006766 <1e-4 s110230 G0:0072528 <1e-4 slr2060 G0:0072524 <1e-4 s110861 G0:0016741 <1e-4 slr1338 G0:0016787 0.1361  
s110688 G0:0006721 <1e-4 s111834 G0:0046907 <1e-4 slr1788 G0:0046907 <1e-4 ss12733 G0:0015399 <1e-4 slr0981 G0:0016787 0.1361  
s111173 G0:0065007 <1e-4 slr0112 G0:0019222 <1e-4 slr1143 G0:0006811 <1e-4 s111735 G0:0016817 <1e-4 slr0887 G0:0016787 0.1361  
slr1270 G0:0072521 <1e-4 s110376 G0:0044106 <1e-4 slr1032 G0:0034641 <1e-4 slr0609 G0:0016817 <1e-4 s111267 G0:0016787 0.1361  
s110615 G0:0051246 <1e-4 ssr5020 G0:0009987 <1e-4 slr0818 G0:0052111 <1e-4 slr1391 G0:0015291 <1e-4 s110871 G0:0016787 0.1361  
slr0971 G0:0071840 <1e-4 ss15113 G0:0009117 <1e-4 s111130 G0:0046907 <1e-4 slr1236 G0:0005342 <1e-4 s111411 G0:0016787 0.1361  
slr0821 G0:0048522 <1e-4 s117089 G0:0071496 <1e-4 slr0742 G0:0031326 <1e-4 slr1614 G0:0016462 <1e-4 slr0510 G0:0016787 0.1361  
s111036 G0:0019222 <1e-4 s111797 G0:0019637 <1e-4 slr1023 G0:0022607 <1e-4 s111702 G0:0003674 <1e-4 s111201 G0:0016787 0.1361  
slr0337 G0:0016053 <1e-4 slr0609 G0:0009991 <1e-4 s111411 G0:0006066 <1e-4 ss13451 G0:0043492 <1e-4 slr7024 G0:0016787 0.1361  
s110008 G0:0006720 <1e-4 slr0579 G0:0051347 <1e-4 slr1541 G0:0065007 <1e-4 s110162 G0:0022832 <1e-4 s111071 G0:0016787 0.1361  
slr0941 G0:0042455 <1e-4 s111131 G0:0009991 <1e-4 s118001 G0:0051188 <1e-4 slr0888 G0:0015267 <1e-4 slr0111 G0:0016787 0.1361  
slr1052 G0:0016054 <1e-4 s111267 G0:0016053 <1e-4 s110614 G0:0009059 <1e-4 slr0392 G0:0022890 <1e-4 slr1259 G0:0016787 0.1361  
s111119 G0:0006576 <1e-4 slr1143 G0:0043170 <1e-4 slr0821 G0:0071841 <1e-4 s117047 G0:0043167 <1e-4 s117065 G0:0016787 0.1361  
slr1990 G0:0051716 <1e-4 s110732 G0:0006082 <1e-4 slr1438 G0:0080090 <1e-4 s111040 G0:0015077 <1e-4 s110781 G0:0016787 0.1361  
ss10294 G0:0009144 <1e-4 ss11972 G0:0006732 <1e-4 s111630 G0:0051234 <1e-4 slr0885 G0:0022891 <1e-4 s110888 G0:0016787 0.1361  
ss11577 G0:0016053 <1e-4 slr0553 G0:0006732 <1e-4 ssr1552 G0:0006576 <1e-4 slr0609 G0:0022857 <1e-4 s110980 G0:0016787 0.1361  
ssr6086 G0:0034641 <1e-4 slr1070 G0:0044260 <1e-4 slr0937 G0:0051716 <1e-4 s111915 G0:0008171 <1e-4 slr0149 G0:0016787 0.1361  
slr1097 G0:0006066 <1e-4 s115003 G0:0042180 <1e-4 s111040 G0:0009117 <1e-4 s110252 G0:0016788 <1e-4 slr0680 G0:0016787 0.1361  
s111638 G0:0009260 <1e-4 slr2110 G0:0034641 <1e-4 s117078 G0:0072528 <1e-4 slr5111 G0:0022890 <1e-4 slr0702 G0:0016787 0.1361  
ssr0692 G0:0006766 <1e-4 slr0207 G0:0033013 <1e-4 s110827 G0:0048522 <1e-4 s111640 G0:0016462 <1e-4 s110189 G0:0016787 0.1361  
s110788 G0:0042255 <1e-4 slr1926 G0:0055086 <1e-4 slr1864 G0:0006082 <1e-4 slr1218 G0:0008171 <1e-4 s111390 G0:0016787 0.1361

s111344 G0:0065007 <1e-4 s1r0145 G0:0009308 <1e-4 s111233 G0:0045184 <1e-4 s111485 G0:0005342 <1e-4 slr1240 G0:0016787 0.1361  
slr1270 G0:0044260 <1e-4 s110381 G0:0044281 <1e-4 slr1081 G0:0008610 <1e-4 s111130 G0:0005342 <1e-4 slr0815 G0:0016787 0.1361  
slr1116 G0:0044248 <1e-4 s1r0848 G0:0065007 <1e-4 s1r1258 G0:0006793 <1e-4 slr1470 G0:0022838 <1e-4 slr1033 G0:0016787 0.1361  
slr1258 G0:0016054 <1e-4 s112011 G0:0065007 <1e-4 slr0552 G0:0006066 <1e-4 s110696 G0:0015291 <1e-4 slr0456 G0:0016787 0.1361  
slr6038 G0:0051171 <1e-4 s110518 G0:0048523 <1e-4 s110611 G0:0046394 <1e-4 s110925 G0:0022857 <1e-4 s111660 G0:0016787 0.1361  
ssr5074 G0:0045184 <1e-4 s1r1563 G0:0019222 <1e-4 s110585 G0:0009056 <1e-4 s1r5020 G0:0015405 <1e-4 ss10483 G0:0016787 0.1361  
slr5021 G0:0034641 <1e-4 s111399 G0:0008150 <1e-4 s110547 G0:0044281 <1e-4 s1r2962 G0:0016818 <1e-4 s110412 G0:0016787 0.1361  
slr0211 G0:0072527 <1e-4 s1r1143 G0:0009394 <1e-4 s111979 G0:0060255 <1e-4 slr1338 G0:0022832 <1e-4 slr1415 G0:0016787 0.1361  
ss18005 G0:0006082 <1e-4 s110661 G0:0051716 <1e-4 ss10467 G0:0051186 <1e-4 slr1327 G0:0016817 <1e-4 slr2125 G0:0016787 0.1361  
slr0765 G0:0080090 <1e-4 s111511 G0:0071840 <1e-4 slr1668 G0:0042455 <1e-4 slr0509 G0:0043492 <1e-4 slr1062 G0:0016787 0.1361  
s111378 G0:0001932 <1e-4 s1r0272 G0:0044283 <1e-4 s110564 G0:0009991 <1e-4 slr0038 G0:0022857 <1e-4 slr1658 G0:0016787 0.1361  
slr0552 G0:0043412 <1e-4 s1r1114 G0:0044106 <1e-4 s110310 G0:0009142 <1e-4 slr1301 G0:0022803 <1e-4 slr0468 G0:0016787 0.1361  
s110732 G0:0009142 <1e-4 s111135 G0:0043549 <1e-4 slr7037 G0:0043648 <1e-4 s1r0759 G0:0016741 <1e-4 ss10739 G0:0016787 0.1361  
ss12595 G0:0033013 <1e-4 s1r7014 G0:0010556 <1e-4 slr1173 G0:0048519 <1e-4 s111942 G0:0015405 <1e-4 slr1613 G0:0016787 0.1361  
slr0300 G0:0010468 <1e-4 s111671 G0:0046394 <1e-4 s117087 G0:0006066 <1e-4 s110263 G0:0015293 <1e-4 s111372 G0:0016787 0.1361  
ssr2975 G0:0019222 <1e-4 s1r6074 G0:0051716 <1e-4 s110996 G0:0071842 <1e-4 slr0625 G0:0022891 <1e-4 s110359 G0:0016787 0.1361  
s110857 G0:0006220 <1e-4 s115130 G0:0043170 <1e-4 s1r2201 G0:0009141 <1e-4 s110861 G0:0016818 <1e-4 s1r2009 G0:0016787 0.1361  
s111219 G0:0052111 <1e-4 s1r0723 G0:0044248 <1e-4 s117063 G0:0016054 <1e-4 slr0610 G0:0022890 <1e-4 s110180 G0:0016787 0.1361  
slr1117 G0:0071554 <1e-4 s1r0551 G0:0072524 <1e-4 ss15091 G0:0071554 <1e-4 s1r2848 G0:0015293 <1e-4 s110188 G0:0016787 0.1361  
s111717 G0:0042455 <1e-4 s115069 G0:0042180 <1e-4 s111132 G0:0080090 <1e-4 s116054 G0:0003674 <1e-4 slr0348 G0:0005488 0.1355  
s111095 G0:0019751 <1e-4 s111380 G0:0009991 <1e-4 slr0364 G0:0044283 <1e-4 s110066 G0:0022803 <1e-4 slr1437 G0:0005488 0.1355  
slr0863 G0:0042180 <1e-4 ss10739 G0:0006733 <1e-4 s110762 G0:0044003 <1e-4 s1r2972 G0:0015399 <1e-4 s110414 G0:0005488 0.1355  
s110188 G0:0009394 <1e-4 s1r0147 G0:0009260 <1e-4 s111024 G0:0050794 <1e-4 s111186 G0:0022891 <1e-4 slr0192 G0:0005488 0.1355  
slr1789 G0:0043648 <1e-4 s1r0569 G0:0051716 <1e-4 slr0816 G0:0009142 <1e-4 s110102 G0:0015291 <1e-4 s110023 G0:0005488 0.1355  
slr2032 G0:0050794 <1e-4 s1r0655 G0:0018130 <1e-4 s110803 G0:0006631 <1e-4 slr7073 G0:0015293 <1e-4 s1r2962 G0:0005488 0.1355  
slr1168 G0:0006766 <1e-4 s111036 G0:0050801 <1e-4 slr0602 G0:0080090 <1e-4 slr1670 G0:0015075 <1e-4 slr1530 G0:0005488 0.1355  
ssr2787 G0:0065007 <1e-4 s1r1290 G0:0031640 <1e-4 slr0869 G0:0043648 <1e-4 slr0948 G0:0016818 <1e-4 s110756 G0:0005488 0.1355  
s118035 G0:0006793 <1e-4 s1r0655 G0:0080090 <1e-4 s110572 G0:0044283 <1e-4 s110406 G0:0015405 <1e-4 slr0404 G0:0005488 0.1355  
s111267 G0:0034654 <1e-4 s1r1378 G0:0042455 <1e-4 slr7013 G0:0044282 <1e-4 s117067 G0:0022890 <1e-4 s111086 G0:0005488 0.1355  
slr1799 G0:0043170 <1e-4 s111464 G0:0018130 <1e-4 s1r0536 G0:0052188 <1e-4 ss15129 G0:0022832 <1e-4 slr1275 G0:0005488 0.1355  
slr1827 G0:0046164 <1e-4 s110793 G0:0009893 <1e-4 slr1363 G0:0009259 <1e-4 slr0869 G0:0016818 <1e-4 ss10352 G0:0005488 0.1355  
slr0505 G0:0006811 <1e-4 s110688 G0:0051818 <1e-4 s110442 G0:0009893 <1e-4 s110839 G0:0016818 <1e-4 slr0941 G0:0005488 0.1355  
s110147 G0:0019222 <1e-4 s1r1087 G0:0044106 <1e-4 slr1116 G0:0051186 <1e-4 slr0243 G0:0042623 <1e-4 slr0360 G0:0005488 0.1355  
s111433 G0:0009259 <1e-4 ss12996 G0:0009892 <1e-4 s1r2803 G0:0009150 <1e-4 ss10750 G0:0015405 <1e-4 s111656 G0:0005488 0.1355  
s111350 G0:0043648 <1e-4 s1r0975 G0:0042455 <1e-4 s111040 G0:0006631 <1e-4 slr1470 G0:0003674 <1e-4 s1r3571 G0:0005488 0.1355  
s110284 G0:0022411 <1e-4 s111219 G0:0071554 <1e-4 s111372 G0:0080090 <1e-4 s111132 G0:0022838 <1e-4 slr1932 G0:0005488 0.1355  
slr6080 G0:0019752 <1e-4 s1r0645 G0:0071554 <1e-4 ss12162 G0:0065007 <1e-4 s111388 G0:0042623 <1e-4 ss10242 G0:0005488 0.1355  
slr0208 G0:0006732 <1e-4 s1r0337 G0:0001932 <1e-4 slr0053 G0:0043549 <1e-4 slr6072 G0:0043167 <1e-4 slr1964 G0:0005488 0.1355  
s115130 G0:0008150 <1e-4 s111359 G0:0034654 <1e-4 ss12814 G0:0048522 <1e-4 slr0890 G0:0043492 <1e-4 slr0294 G0:0005488 0.1355  
slr0670 G0:0072528 <1e-4 s110381 G0:0006082 <1e-4 s111652 G0:0009987 <1e-4 slr1809 G0:0016746 <1e-4 s110007 G0:0005488 0.1355  
slr1847 G0:0009165 <1e-4 s115089 G0:0006163 <1e-4 ss17021 G0:0055114 <1e-4 slr0318 G0:0015293 <1e-4 s111830 G0:0005488 0.1355  
slr0263 G0:0043549 <1e-4 s1r1547 G0:0051186 <1e-4 s111858 G0:0009123 <1e-4 slr1173 G0:0022832 <1e-4 ss12065 G0:0005488 0.1355  
ss13692 G0:0009263 <1e-4 s110765 G0:0022607 <1e-4 slr0765 G0:0009059 <1e-4 s111389 G0:0005342 <1e-4 slr1084 G0:0005488 0.1355  
ss11300 G0:0006721 <1e-4 ss10461 G0:0009987 <1e-4 s110225 G0:0044281 <1e-4 s110481 G0:0043492 <1e-4 slr1177 G0:0005488 0.1355  
s111273 G0:0009309 <1e-4 s110740 G0:0006066 <1e-4 s111680 G0:0009309 <1e-4 s110837 G0:0016746 <1e-4 s110177 G0:0005488 0.1355  
ss10788 G0:0031323 <1e-4 s1r6026 G0:0009394 <1e-4 s110864 G0:0072524 <1e-4 slr1209 G0:0015405 <1e-4 slr2122 G0:0005488 0.1355  
s110372 G0:0044271 <1e-4 s1r1425 G0:0045184 <1e-4 s110742 G0:0031326 <1e-4 slr1573 G0:0043167 <1e-4 slr1880 G0:0005488 0.1355  
slr5111 G0:0019637 <1e-4 s110584 G0:0046164 <1e-4 s115063 G0:0051818 <1e-4 s110872 G0:0016818 <1e-4 s111658 G0:0005488 0.1355  
s111092 G0:0009142 <1e-4 slr2000 G0:0006576 <1e-4 slr6022 G0:0009889 <1e-4 s1r2843 G0:0022891 <1e-4 s111002 G0:0005488 0.1355  
s111340 G0:0006793 <1e-4 s1r1591 G0:0009150 <1e-4 s110609 G0:0090304 <1e-4 ss17021 G0:0022838 <1e-4 s111630 G0:0005488 0.1355  
s110639 G0:0006733 <1e-4 s110669 G0:0016054 <1e-4 s117087 G0:0046907 <1e-4 slr0345 G0:0022857 <1e-4 slr0723 G0:0005488 0.1355  
s110761 G0:0009893 <1e-4 s110925 G0:0051716 <1e-4 slr1568 G0:0044271 <1e-4 s110176 G0:0043492 <1e-4 s110085 G0:0005488 0.1355  
slr1668 G0:0006811 <1e-4 s117047 G0:0019219 <1e-4 slr1413 G0:0001932 <1e-4 slr1880 G0:0016462 <1e-4 s1r2787 G0:0005488 0.1355  
s110238 G0:0006163 <1e-4 s1r2802 G0:0019219 <1e-4 s110293 G0:0006066 <1e-4 slr1907 G0:0022892 <1e-4 slr0872 G0:0005488 0.1355

|          |            |       |          |            |       |          |            |       |          |            |       |          |            |        |
|----------|------------|-------|----------|------------|-------|----------|------------|-------|----------|------------|-------|----------|------------|--------|
| sll1530  | G0:0009059 | <1e-4 | sll1004  | G0:0031326 | <1e-4 | slr7037  | G0:0009991 | <1e-4 | slr7098  | G0:0043492 | <1e-4 | slr1854  | G0:0005488 | 0.1355 |
| sll1925  | G0:0009161 | <1e-4 | sll10572 | G0:0051186 | <1e-4 | sll10496 | G0:0065007 | <1e-4 | slr1152  | G0:0022892 | <1e-4 | sll11613 | G0:0005488 | 0.1355 |
| slr0545  | G0:0008150 | <1e-4 | sll18027 | G0:0051179 | <1e-4 | slr0142  | G0:0044248 | <1e-4 | slr1068  | G0:0022832 | <1e-4 | slr1999  | G0:0005488 | 0.1355 |
| slr1593  | G0:0008150 | <1e-4 | slr1815  | G0:0044106 | <1e-4 | slr0712  | G0:0019751 | <1e-4 | slr1577  | G0:0022892 | <1e-4 | slr1210  | G0:0005488 | 0.1355 |
| ssl7021  | G0:0010556 | <1e-4 | slr7083  | G0:0055082 | <1e-4 | sll18019 | G0:0009059 | <1e-4 | slr1568  | G0:0016746 | <1e-4 | sll11736 | G0:0005488 | 0.1355 |
| slr1437  | G0:0009161 | <1e-4 | sll1241  | G0:0006220 | <1e-4 | slr1721  | G0:0071554 | <1e-4 | slr5013  | G0:0022891 | <1e-4 | sll1632  | G0:0005215 | 0.1352 |
| slr0144  | G0:0005996 | <1e-4 | sll11510 | G0:0071554 | <1e-4 | sll10732 | G0:0006733 | <1e-4 | slr6106  | G0:0008171 | <1e-4 | slr0348  | G0:0005215 | 0.1352 |
| slr0770  | G0:0034654 | <1e-4 | slr1563  | G0:0009987 | <1e-4 | slr6094  | G0:0044275 | <1e-4 | slr2005  | G0:0016818 | <1e-4 | sll10676 | G0:0005215 | 0.1352 |
| slr1240  | G0:0009117 | <1e-4 | slr0049  | G0:0006766 | <1e-4 | sll10319 | G0:0046128 | <1e-4 | slr6075  | G0:0015399 | <1e-4 | slr0941  | G0:0005215 | 0.1352 |
| slr6039  | G0:0044271 | <1e-4 | ssl7046  | G0:0046394 | <1e-4 | ssl5100  | G0:0052188 | <1e-4 | slr1636  | G0:0022803 | <1e-4 | sll11761 | G0:0005215 | 0.1352 |
| sll1939  | G0:0044260 | <1e-4 | slr0607  | G0:0031326 | <1e-4 | ssl11417 | G0:0051246 | <1e-4 | sll10499 | G0:0015291 | <1e-4 | sll10524 | G0:0005215 | 0.1352 |
| slr5017  | G0:0006766 | <1e-4 | sll11049 | G0:0050789 | <1e-4 | slr1162  | G0:0031326 | <1e-4 | slr1702  | G0:0022891 | <1e-4 | slr0404  | G0:0005215 | 0.1352 |
| slr1827  | G0:0006766 | <1e-4 | slr6008  | G0:0051186 | <1e-4 | slr1690  | G0:0044281 | <1e-4 | sll11717 | G0:0022891 | <1e-4 | slr1230  | G0:0005215 | 0.1352 |
| ssr7017  | G0:0006721 | <1e-4 | sll1241  | G0:0009132 | <1e-4 | sll11880 | G0:0044255 | <1e-4 | slr0416  | G0:0003674 | <1e-4 | slr0294  | G0:0005215 | 0.1352 |
| sll18040 | G0:0043170 | <1e-4 | slr2120  | G0:0010556 | <1e-4 | sll11541 | G0:0006082 | <1e-4 | sll11381 | G0:0042623 | <1e-4 | ssl2065  | G0:0005215 | 0.1352 |
| ssr2317  | G0:0009987 | <1e-4 | sll11562 | G0:0044281 | <1e-4 | sll11764 | G0:0044283 | <1e-4 | sll10669 | G0:0003674 | <1e-4 | slr0204  | G0:0005215 | 0.1352 |
| slr1062  | G0:0009117 | <1e-4 | slr1396  | G0:0044271 | <1e-4 | slr0489  | G0:0006066 | <1e-4 | slr1920  | G0:0022892 | <1e-4 | slr1913  | G0:0005215 | 0.1352 |
| sll10780 | G0:0045184 | <1e-4 | slr1811  | G0:0009308 | <1e-4 | slr7015  | G0:0052111 | <1e-4 | ssl5007  | G0:0022832 | <1e-4 | sll10414 | G0:0005215 | 0.1352 |
| slr1436  | G0:0009987 | <1e-4 | slr1568  | G0:0051234 | <1e-4 | slr0642  | G0:0046164 | <1e-4 | sll10696 | G0:0060089 | <1e-4 | slr2011  | G0:0005215 | 0.1352 |
| ssl1792  | G0:0019219 | <1e-4 | sll11658 | G0:0072528 | <1e-4 | sll11562 | G0:0019362 | <1e-4 | slr1222  | G0:0022836 | <1e-4 | sll11658 | G0:0005215 | 0.1352 |
| slr0304  | G0:0009394 | <1e-4 | slr7091  | G0:0043412 | <1e-4 | sll11381 | G0:0048523 | <1e-4 | slr5127  | G0:0022838 | <1e-4 | sll11061 | G0:0005215 | 0.1352 |
| sll10524 | G0:0050801 | <1e-4 | sll10860 | G0:0050794 | <1e-4 | slr1704  | G0:0090304 | <1e-4 | sll11949 | G0:0022838 | <1e-4 | slr2144  | G0:0005215 | 0.1352 |
| sll18033 | G0:0048522 | <1e-4 | ssr1473  | G0:0051171 | <1e-4 | slr6006  | G0:0034641 | <1e-4 | sll11769 | G0:0016818 | <1e-4 | ssl0242  | G0:0005215 | 0.1352 |
| ssl12971 | G0:0043549 | <1e-4 | sll11390 | G0:0071842 | <1e-4 | slr0108  | G0:0072528 | <1e-4 | sll10860 | G0:0022836 | <1e-4 | sll10085 | G0:0005215 | 0.1352 |
| sll10854 | G0:0071842 | <1e-4 | sll11797 | G0:0022411 | <1e-4 | sll10297 | G0:0072524 | <1e-4 | slr0348  | G0:0022857 | <1e-4 | slr1667  | G0:0005215 | 0.1352 |
| slr0765  | G0:0043170 | <1e-4 | ssr0657  | G0:0006066 | <1e-4 | slr1566  | G0:0033013 | <1e-4 | slr0607  | G0:0060089 | <1e-4 | slr0586  | G0:0005215 | 0.1352 |
| slr2038  | G0:0009394 | <1e-4 | sll11472 | G0:0034641 | <1e-4 | sll10615 | G0:0050794 | <1e-4 | sll10857 | G0:0016817 | <1e-4 | slr2121  | G0:0005215 | 0.1352 |
| sll10325 | G0:0071496 | <1e-4 | sll10563 | G0:0044283 | <1e-4 | sll10445 | G0:0019222 | <1e-4 | slr1944  | G0:0042623 | <1e-4 | sll10237 | G0:0005215 | 0.1352 |
| sll10413 | G0:0019362 | <1e-4 | sll10413 | G0:0044281 | <1e-4 | slr2012  | G0:0009056 | <1e-4 | ssr6099  | G0:0016818 | <1e-4 | slr1638  | G0:0005215 | 0.1352 |
| ssl13382 | G0:0008150 | <1e-4 | sll10243 | G0:0044255 | <1e-4 | slr11183 | G0:0051188 | <1e-4 | sll11601 | G0:0008171 | <1e-4 | sll10243 | G0:0005215 | 0.1352 |
| slr1170  | G0:0043170 | <1e-4 | slr1101  | G0:0006733 | <1e-4 | sll10802 | G0:0009892 | <1e-4 | sll10761 | G0:0015291 | <1e-4 | slr1436  | G0:0005215 | 0.1352 |
| sll15034 | G0:0008610 | <1e-4 | sll10062 | G0:0055114 | <1e-4 | slr0967  | G0:0006811 | <1e-4 | slr1074  | G0:0022803 | <1e-4 | slr1999  | G0:0005215 | 0.1352 |
| sll10863 | G0:0010468 | <1e-4 | slr0907  | G0:0044255 | <1e-4 | sll11318 | G0:0071840 | <1e-4 | sll11433 | G0:0022857 | <1e-4 | slr1530  | G0:0005215 | 0.1352 |
| slr1576  | G0:0009150 | <1e-4 | slr1737  | G0:0006793 | <1e-4 | slr1563  | G0:0071840 | <1e-4 | sll10853 | G0:0015293 | <1e-4 | sll11530 | G0:0005215 | 0.1352 |
| sll10328 | G0:0043170 | <1e-4 | sll10564 | G0:0065007 | <1e-4 | slr2038  | G0:0019752 | <1e-4 | slr0935  | G0:0015075 | <1e-4 | sll10068 | G0:0000166 | 0.1345 |
| ssr8013  | G0:0043170 | <1e-4 | ssl7022  | G0:0009141 | <1e-4 | slr1441  | G0:0009124 | <1e-4 | slr0416  | G0:0016462 | <1e-4 | ssl11255 | G0:0005488 | 0.1337 |
| sll10071 | G0:0006163 | <1e-4 | sll10749 | G0:0055082 | <1e-4 | slr7095  | G0:0009987 | <1e-4 | sll10980 | G0:0022892 | <1e-4 | slr1385  | G0:0005488 | 0.1337 |
| sll11022 | G0:0071554 | <1e-4 | slr0294  | G0:0046394 | <1e-4 | slr0303  | G0:0051347 | <1e-4 | sll11036 | G0:0008171 | <1e-4 | slr0491  | G0:0005488 | 0.1337 |
| slr6072  | G0:0006220 | <1e-4 | slr1222  | G0:0006811 | <1e-4 | sll10756 | G0:0019752 | <1e-4 | sll10735 | G0:0022838 | <1e-4 | ssr2843  | G0:0005488 | 0.1337 |
| sll10539 | G0:0019222 | <1e-4 | slr1600  | G0:0009161 | <1e-4 | sll17030 | G0:0009144 | <1e-4 | sll11002 | G0:0022892 | <1e-4 | sll10788 | G0:0005488 | 0.1325 |
| ssr6085  | G0:0044282 | <1e-4 | ssl0242  | G0:0006733 | <1e-4 | ssl11300 | G0:0009123 | <1e-4 | slr0039  | G0:0015293 | <1e-4 | slr0514  | G0:0005488 | 0.1325 |
| sll17087 | G0:0044283 | <1e-4 | slr1799  | G0:0022411 | <1e-4 | slr1800  | G0:0019751 | <1e-4 | slr0232  | G0:0043492 | <1e-4 | sll10175 | G0:0005488 | 0.1325 |
| ssl11255 | G0:0043549 | <1e-4 | slr1648  | G0:0071841 | <1e-4 | sll11510 | G0:0043412 | <1e-4 | sll11938 | G0:0015291 | <1e-4 | sll10192 | G0:0005488 | 0.1325 |
| sll11163 | G0:0044271 | <1e-4 | slr1287  | G0:0006753 | <1e-4 | sll11006 | G0:0048518 | <1e-4 | slr1033  | G0:0043167 | <1e-4 | sll10022 | G0:0005488 | 0.1325 |
| slr0398  | G0:0051347 | <1e-4 | sll17069 | G0:0044271 | <1e-4 | slr11103 | G0:0009059 | <1e-4 | slr0023  | G0:0022890 | <1e-4 | slr1726  | G0:0005488 | 0.1325 |
| sll10995 | G0:0019362 | <1e-4 | sll11906 | G0:0044275 | <1e-4 | sll11401 | G0:0051186 | <1e-4 | sll10558 | G0:0016746 | <1e-4 | slr1047  | G0:0005488 | 0.1325 |
| slr0509  | G0:0009165 | <1e-4 | slr0337  | G0:0006732 | <1e-4 | sll18002 | G0:0009165 | <1e-4 | sll11763 | G0:0022838 | <1e-4 | ssl11377 | G0:0005488 | 0.1325 |
| sll10614 | G0:0009987 | <1e-4 | slr0730  | G0:0072522 | <1e-4 | sll11340 | G0:0009144 | <1e-4 | sll11531 | G0:0016462 | <1e-4 | sll11562 | G0:0005488 | 0.1325 |
| sll11002 | G0:0046128 | <1e-4 | slr1533  | G0:0022607 | <1e-4 | slr1590  | G0:0072522 | <1e-4 | sll11036 | G0:0022892 | <1e-4 | slr1767  | G0:0005488 | 0.1325 |
| ssr3402  | G0:0009260 | <1e-4 | sll10405 | G0:0019752 | <1e-4 | sll10736 | G0:0018130 | <1e-4 | ssr6062  | G0:0043167 | <1e-4 | sll10558 | G0:0005488 | 0.1325 |
| sll10590 | G0:0044283 | <1e-4 | slr1023  | G0:0016052 | <1e-4 | slr0217  | G0:0019751 | <1e-4 | slr0725  | G0:0016741 | <1e-4 | sll10505 | G0:0005488 | 0.1325 |
| sll15097 | G0:0051188 | <1e-4 | slr1306  | G0:0016052 | <1e-4 | slr1644  | G0:0042451 | <1e-4 | ssl5045  | G0:0016741 | <1e-4 | sll10932 | G0:0005488 | 0.1309 |
| slr1999  | G0:0008150 | <1e-4 | ssr5020  | G0:0006766 | <1e-4 | sll10827 | G0:0055082 | <1e-4 | slr0058  | G0:0022803 | <1e-4 | ssr2781  | G0:0005488 | 0.1309 |
| slr7092  | G0:0051186 | <1e-4 | sll11714 | G0:0034660 | <1e-4 | ssr6024  | G0:0046164 | <1e-4 | slr0728  | G0:0022892 | <1e-4 | ssr1256  | G0:0005488 | 0.1309 |

|         |            |       |         |            |       |         |            |       |         |            |       |         |            |        |
|---------|------------|-------|---------|------------|-------|---------|------------|-------|---------|------------|-------|---------|------------|--------|
| ss13573 | G0:0016052 | <1e-4 | s112011 | G0:0019752 | <1e-4 | s111775 | G0:0034641 | <1e-4 | s1r1449 | G0:0015267 | <1e-4 | s110272 | G0:0005488 | 0.1309 |
| s1r1546 | G0:0009124 | <1e-4 | s1r0142 | G0:0006721 | <1e-4 | s111752 | G0:0009394 | <1e-4 | s1r0914 | G0:0016462 | <1e-4 | ssr2803 | G0:0005488 | 0.1309 |
| s110584 | G0:0019362 | <1e-4 | s1r1790 | G0:0072522 | <1e-4 | s117033 | G0:0009150 | <1e-4 | s1r0967 | G0:0022803 | <1e-4 | s111119 | G0:0005488 | 0.1309 |
| s110048 | G0:0009150 | <1e-4 | s1r1618 | G0:0034660 | <1e-4 | s110763 | G0:0043170 | <1e-4 | s110588 | G0:0016462 | <1e-4 | s111250 | G0:0005488 | 0.1309 |
| s1r5087 | G0:0042180 | <1e-4 | s1r1547 | G0:0071496 | <1e-4 | s1r5018 | G0:0009123 | <1e-4 | s117031 | G0:0003674 | <1e-4 | s110238 | G0:0005488 | 0.1309 |
| s1r0967 | G0:0009123 | <1e-4 | ss15103 | G0:0060255 | <1e-4 | ssr0692 | G0:0009142 | <1e-4 | s1r1047 | G0:0005342 | <1e-4 | s110606 | G0:0005488 | 0.1309 |
| s1r0416 | G0:0044106 | <1e-4 | s110372 | G0:0009199 | <1e-4 | s1r1288 | G0:0046483 | <1e-4 | s110436 | G0:0022832 | <1e-4 | s110647 | G0:0005488 | 0.1309 |
| s1r0192 | G0:0034654 | <1e-4 | s111024 | G0:0006753 | <1e-4 | s1r5023 | G0:0010468 | <1e-4 | s111164 | G0:0042623 | <1e-4 | s1r1519 | G0:0005488 | 0.13   |
| ss15098 | G0:0009991 | <1e-4 | s1r6009 | G0:0019222 | <1e-4 | s1r1114 | G0:0006576 | <1e-4 | s110008 | G0:0016818 | <1e-4 | s1r1398 | G0:0005488 | 0.13   |
| s117069 | G0:0019752 | <1e-4 | s110609 | G0:0010468 | <1e-4 | s1r6012 | G0:0046164 | <1e-4 | s110098 | G0:0022891 | <1e-4 | s1r0852 | G0:0005488 | 0.13   |
| s1r1084 | G0:0031326 | <1e-4 | s1r1513 | G0:0051347 | <1e-4 | s1r1546 | G0:0051716 | <1e-4 | s1r0971 | G0:0003674 | <1e-4 | s110996 | G0:0005488 | 0.13   |
| ss10350 | G0:0046394 | <1e-4 | s111926 | G0:0044260 | <1e-4 | s1r6039 | G0:0051716 | <1e-4 | s1r0590 | G0:0015077 | <1e-4 | s111218 | G0:0005488 | 0.13   |
| s110788 | G0:0019362 | <1e-4 | s110327 | G0:0006766 | <1e-4 | s1r0262 | G0:0009142 | <1e-4 | s111307 | G0:0022892 | <1e-4 | s110354 | G0:0005488 | 0.13   |
| s1r8021 | G0:0008610 | <1e-4 | s1r1628 | G0:0031323 | <1e-4 | s1r7080 | G0:0045184 | <1e-4 | s110577 | G0:0022890 | <1e-4 | s1r1376 | G0:0005488 | 0.13   |
| s1r1407 | G0:0009987 | <1e-4 | ss15098 | G0:0044260 | <1e-4 | s1r0337 | G0:0071841 | <1e-4 | s111979 | G0:0016818 | <1e-4 | s1r1533 | G0:0005488 | 0.13   |
| ss15096 | G0:0009144 | <1e-4 | s1r1535 | G0:0072522 | <1e-4 | s111378 | G0:0052188 | <1e-4 | s111461 | G0:0016817 | <1e-4 | s1r0376 | G0:0005488 | 0.13   |
| s1r0815 | G0:0044003 | <1e-4 | s110985 | G0:0006766 | <1e-4 | s110413 | G0:0006631 | <1e-4 | s110783 | G0:0060089 | <1e-4 | ssr3532 | G0:0005488 | 0.13   |
| s110266 | G0:0019752 | <1e-4 | s1r1935 | G0:0006576 | <1e-4 | s1r0813 | G0:0042451 | <1e-4 | s1r1052 | G0:0016741 | <1e-4 | s111542 | G0:0005488 | 0.13   |
| s110496 | G0:0071496 | <1e-4 | ssr5121 | G0:0080090 | <1e-4 | s1r0589 | G0:0006576 | <1e-4 | s1r0510 | G0:0043492 | <1e-4 | s1r1441 | G0:0005488 | 0.13   |
| s110761 | G0:0043549 | <1e-4 | s1r0241 | G0:0019637 | <1e-4 | s115033 | G0:0009161 | <1e-4 | ss15065 | G0:0043492 | <1e-4 | s111601 | G0:0005488 | 0.13   |
| s1r0104 | G0:0019222 | <1e-4 | s111247 | G0:0042180 | <1e-4 | s1r2111 | G0:0008150 | <1e-4 | s1r0771 | G0:0015077 | <1e-4 | s1r0209 | G0:0005488 | 0.13   |
| s111359 | G0:0019637 | <1e-4 | s110198 | G0:0019752 | <1e-4 | s111531 | G0:0072522 | <1e-4 | ssr3402 | G0:0022836 | <1e-4 | s111318 | G0:0005488 | 0.13   |
| s110293 | G0:0009260 | <1e-4 | s1r0731 | G0:0010556 | <1e-4 | s1r0060 | G0:0022411 | <1e-4 | s111049 | G0:0022891 | <1e-4 | s1r0876 | G0:0005488 | 0.13   |
| s1r7073 | G0:0019751 | <1e-4 | s110008 | G0:0033013 | <1e-4 | s115130 | G0:0072522 | <1e-4 | s111401 | G0:0022836 | <1e-4 | ssr0536 | G0:0005488 | 0.13   |
| s1r6022 | G0:0022607 | <1e-4 | s110447 | G0:0022607 | <1e-4 | s110997 | G0:0065007 | <1e-4 | ss17007 | G0:0008171 | <1e-4 | s110424 | G0:0005488 | 0.13   |
| s1r0398 | G0:0009991 | <1e-4 | s1r1104 | G0:0019222 | <1e-4 | s110372 | G0:0006811 | <1e-4 | s1r1927 | G0:0060089 | <1e-4 | s1r1917 | G0:0005488 | 0.13   |
| s1r0364 | G0:0009142 | <1e-4 | s1r1186 | G0:0046394 | <1e-4 | ssr2047 | G0:0009144 | <1e-4 | s111486 | G0:0015293 | <1e-4 | ssr1375 | G0:0005488 | 0.13   |
| s110412 | G0:0048522 | <1e-4 | s110931 | G0:0006793 | <1e-4 | s110208 | G0:0044282 | <1e-4 | s1r2084 | G0:0043167 | <1e-4 | s1r0305 | G0:0005488 | 0.13   |
| s110553 | G0:0071496 | <1e-4 | s1r0060 | G0:0009132 | <1e-4 | s110160 | G0:0006720 | <1e-4 | s111757 | G0:0042623 | <1e-4 | s1r1799 | G0:0005488 | 0.13   |
| s1r1397 | G0:0043933 | <1e-4 | s1r6005 | G0:0006720 | <1e-4 | s110047 | G0:0042180 | <1e-4 | s1r1470 | G0:0015399 | <1e-4 | s1r0076 | G0:0005488 | 0.13   |
| s1r0243 | G0:0043412 | <1e-4 | s110008 | G0:0006766 | <1e-4 | s110281 | G0:0019751 | <1e-4 | s110101 | G0:0016817 | <1e-4 | s110360 | G0:0005488 | 0.13   |
| ss13382 | G0:0009123 | <1e-4 | s1r1474 | G0:0009889 | <1e-4 | s118033 | G0:0042180 | <1e-4 | ss12064 | G0:0043492 | <1e-4 | s1r0304 | G0:0005488 | 0.13   |
| s111542 | G0:0052111 | <1e-4 | s1r0416 | G0:0005996 | <1e-4 | s111950 | G0:0071554 | <1e-4 | s1r2038 | G0:0005342 | <1e-4 | s111715 | G0:0005488 | 0.13   |
| s1r1599 | G0:0006091 | <1e-4 | s1r1866 | G0:0050789 | <1e-4 | s111527 | G0:0019752 | <1e-4 | s1r6067 | G0:0015077 | <1e-4 | s111527 | G0:0005488 | 0.1294 |
| s1r1809 | G0:0090304 | <1e-4 | s1r2073 | G0:0009142 | <1e-4 | s1r1880 | G0:0080090 | <1e-4 | ssr6048 | G0:0016746 | <1e-4 | s111293 | G0:0005488 | 0.1294 |
| ssr1765 | G0:0009150 | <1e-4 | s1r1398 | G0:0010556 | <1e-4 | s1r2038 | G0:0044106 | <1e-4 | ss16061 | G0:0003674 | <1e-4 | s1r0605 | G0:0017111 | 0.1261 |
| s110488 | G0:0050896 | <1e-4 | ssr2711 | G0:0009117 | <1e-4 | s1r1122 | G0:0051179 | <1e-4 | s111938 | G0:0022892 | <1e-4 | s111240 | G0:0017111 | 0.1261 |
| s110788 | G0:0009259 | <1e-4 | s111570 | G0:0034654 | <1e-4 | s1r0519 | G0:0016054 | <1e-4 | s110405 | G0:0015075 | <1e-4 | s110740 | G0:0017111 | 0.1261 |
| ssr2047 | G0:0034641 | <1e-4 | s1r0148 | G0:0051716 | <1e-4 | s111352 | G0:0043933 | <1e-4 | ss12069 | G0:0015399 | <1e-4 | s1r2005 | G0:0017111 | 0.1261 |
| s1r1209 | G0:0009141 | <1e-4 | s1r1301 | G0:0045184 | <1e-4 | s110328 | G0:0006163 | <1e-4 | s110423 | G0:0016817 | <1e-4 | s110909 | G0:0017111 | 0.1261 |
| s1r6022 | G0:0009117 | <1e-4 | s1r0476 | G0:0065007 | <1e-4 | s1r0609 | G0:0051716 | <1e-4 | ss15031 | G0:0008171 | <1e-4 | s111541 | G0:0017111 | 0.1261 |
| s1r1069 | G0:0065007 | <1e-4 | ssr1375 | G0:0022607 | <1e-4 | s111321 | G0:0031640 | <1e-4 | s1r1951 | G0:0005342 | <1e-4 | ssr2009 | G0:0017111 | 0.1261 |
| s111912 | G0:0019362 | <1e-4 | ss15008 | G0:0009263 | <1e-4 | s111562 | G0:0006720 | <1e-4 | s110354 | G0:0022892 | <1e-4 | s111267 | G0:0017111 | 0.1261 |
| s1r1084 | G0:0043549 | <1e-4 | ss10750 | G0:0044255 | <1e-4 | s1r0243 | G0:0043436 | <1e-4 | s1r0613 | G0:0015291 | <1e-4 | s1r1493 | G0:0017111 | 0.1261 |
| s1r0431 | G0:0046394 | <1e-4 | s1r2012 | G0:0043412 | <1e-4 | s111426 | G0:0042451 | <1e-4 | s1r1546 | G0:0015405 | <1e-4 | s110787 | G0:0017111 | 0.1261 |
| ss12781 | G0:0045184 | <1e-4 | ss15031 | G0:0043436 | <1e-4 | s115062 | G0:0044281 | <1e-4 | ssr2009 | G0:0015405 | <1e-4 | s1r1809 | G0:0017111 | 0.1261 |
| s110147 | G0:0051188 | <1e-4 | s117086 | G0:0009892 | <1e-4 | s111571 | G0:0046164 | <1e-4 | s1r1603 | G0:0015291 | <1e-4 | s111399 | G0:0017111 | 0.1261 |
| s111902 | G0:0043412 | <1e-4 | s110615 | G0:0006066 | <1e-4 | s1r1699 | G0:0019637 | <1e-4 | s1r0887 | G0:0016741 | <1e-4 | s110188 | G0:0017111 | 0.1261 |
| s1r0271 | G0:0046164 | <1e-4 | s111681 | G0:0006091 | <1e-4 | s1r0913 | G0:0071496 | <1e-4 | s110871 | G0:0016741 | <1e-4 | s1r0358 | G0:0017111 | 0.1261 |
| ssr3402 | G0:0080090 | <1e-4 | s110997 | G0:0006163 | <1e-4 | s110804 | G0:0005996 | <1e-4 | s1r1619 | G0:0043167 | <1e-4 | s1r0924 | G0:0017111 | 0.1261 |
| s111702 | G0:0009059 | <1e-4 | s111350 | G0:0006082 | <1e-4 | s110428 | G0:0060255 | <1e-4 | s110157 | G0:0016746 | <1e-4 | s111938 | G0:0017111 | 0.1261 |
| ssr6003 | G0:0048523 | <1e-4 | s1r0971 | G0:0009263 | <1e-4 | s111921 | G0:0009123 | <1e-4 | s1r0863 | G0:0022891 | <1e-4 | s111390 | G0:0017111 | 0.1261 |
| s1r0957 | G0:0009124 | <1e-4 | s1r1944 | G0:0044271 | <1e-4 | s112011 | G0:0034660 | <1e-4 | s1r1032 | G0:0015399 | <1e-4 | s110297 | G0:0017111 | 0.1261 |
| s111751 | G0:0051347 | <1e-4 | s1r7037 | G0:0043170 | <1e-4 | s1r1391 | G0:0051171 | <1e-4 | s110253 | G0:0060089 | <1e-4 | s110837 | G0:0017111 | 0.1261 |

|         |            |       |         |            |       |         |            |       |         |            |       |         |            |        |
|---------|------------|-------|---------|------------|-------|---------|------------|-------|---------|------------|-------|---------|------------|--------|
| sl10449 | G0:0046128 | <1e-4 | slr1628 | G0:0050789 | <1e-4 | slr6063 | G0:0043436 | <1e-4 | slr5116 | G0:0015075 | <1e-4 | slr0935 | G0:0017111 | 0.1261 |
| slr1273 | G0:0009259 | <1e-4 | sl10658 | G0:0005996 | <1e-4 | sl11321 | G0:0048522 | <1e-4 | slr1170 | G0:0015405 | <1e-4 | sl10737 | G0:0017111 | 0.1261 |
| slr0913 | G0:0006066 | <1e-4 | slr1623 | G0:0009262 | <1e-4 | ssr3122 | G0:0051171 | <1e-4 | sl15089 | G0:0015291 | <1e-4 | sl10590 | G0:0017111 | 0.1261 |
| sl11954 | G0:0046164 | <1e-4 | sl10802 | G0:0019751 | <1e-4 | sl10497 | G0:0009259 | <1e-4 | slr1122 | G0:0022891 | <1e-4 | slr0815 | G0:0017111 | 0.1261 |
| slr0345 | G0:0044283 | <1e-4 | slr1169 | G0:0019219 | <1e-4 | sl10488 | G0:0009126 | <1e-4 | slr0586 | G0:0022838 | <1e-4 | slr1258 | G0:0017111 | 0.1261 |
| slr5116 | G0:0044255 | <1e-4 | slr1895 | G0:0048523 | <1e-4 | slr1070 | G0:0009059 | <1e-4 | slr7097 | G0:0015291 | <1e-4 | sl11659 | G0:0017111 | 0.1261 |
| slr5016 | G0:0009142 | <1e-4 | sl17034 | G0:0006753 | <1e-4 | slr1762 | G0:0006220 | <1e-4 | slr1851 | G0:0015291 | <1e-4 | sl11201 | G0:0017111 | 0.1261 |
| sl10243 | G0:0009161 | <1e-4 | sl10156 | G0:0051171 | <1e-4 | slr0588 | G0:0006811 | <1e-4 | sl10192 | G0:0022891 | <1e-4 | slr0053 | G0:0017111 | 0.1261 |
| slr1074 | G0:0051186 | <1e-4 | ssr0536 | G0:0006811 | <1e-4 | ssr5120 | G0:0006066 | <1e-4 | sl10793 | G0:0005342 | <1e-4 | ss10739 | G0:0017111 | 0.1261 |
| sl10737 | G0:0048519 | <1e-4 | slr0082 | G0:0071554 | <1e-4 | slr0404 | G0:0044248 | <1e-4 | sl10985 | G0:0022890 | <1e-4 | sl11512 | G0:0017111 | 0.1261 |
| slr1495 | G0:0006091 | <1e-4 | sl11675 | G0:0072522 | <1e-4 | sl11640 | G0:0031326 | <1e-4 | sl11092 | G0:0022891 | <1e-4 | sl10911 | G0:0017111 | 0.1261 |
| slr0145 | G0:0031326 | <1e-4 | slr1362 | G0:0009308 | <1e-4 | sl10933 | G0:0009117 | <1e-4 | sl10443 | G0:0016746 | <1e-4 | sl11350 | G0:0017111 | 0.1261 |
| slr1935 | G0:0072521 | <1e-4 | sl17031 | G0:0009987 | <1e-4 | slr1959 | G0:0006721 | <1e-4 | sl17090 | G0:0003674 | <1e-4 | slr0172 | G0:0017111 | 0.1261 |
| sl10543 | G0:0034641 | <1e-4 | slr1087 | G0:0009150 | <1e-4 | sl11562 | G0:0043412 | <1e-4 | sl18019 | G0:0022891 | <1e-4 | sl11344 | G0:0017111 | 0.1261 |
| ssr2781 | G0:0052111 | <1e-4 | ssl1255 | G0:0009892 | <1e-4 | slr1168 | G0:0009150 | <1e-4 | sg10001 | G0:0043167 | <1e-4 | sl11071 | G0:0017111 | 0.1261 |
| sl10310 | G0:0009141 | <1e-4 | slr0959 | G0:0010556 | <1e-4 | slr2105 | G0:0042180 | <1e-4 | slr2060 | G0:0022832 | <1e-4 | slr2125 | G0:0017111 | 0.1261 |
| sl16054 | G0:0043436 | <1e-4 | slr1068 | G0:0043170 | <1e-4 | sl17028 | G0:0055086 | <1e-4 | sl10022 | G0:0015077 | <1e-4 | sl10688 | G0:0017111 | 0.1261 |
| sl10623 | G0:0009309 | <1e-4 | sl11763 | G0:0046394 | <1e-4 | slr0356 | G0:0046907 | <1e-4 | sl11950 | G0:0043167 | <1e-4 | sl10449 | G0:0017111 | 0.1261 |
| slr0151 | G0:0008150 | <1e-4 | slr1854 | G0:0050801 | <1e-4 | sl11965 | G0:0065007 | <1e-4 | sl10872 | G0:0022836 | <1e-4 | slr0702 | G0:0017111 | 0.1261 |
| ssl7074 | G0:0048518 | <1e-4 | slr2005 | G0:0055082 | <1e-4 | slr0456 | G0:0072521 | <1e-4 | slr1534 | G0:0022891 | <1e-4 | slr0149 | G0:0017111 | 0.1261 |
| sl11921 | G0:0051246 | <1e-4 | slr1236 | G0:0009987 | <1e-4 | sl10872 | G0:0043648 | <1e-4 | ssr2787 | G0:0022832 | <1e-4 | sl11660 | G0:0017111 | 0.1261 |
| slr2025 | G0:0051179 | <1e-4 | slr0149 | G0:0009057 | <1e-4 | slr5126 | G0:0080090 | <1e-4 | slr0699 | G0:0015291 | <1e-4 | slr1259 | G0:0017111 | 0.1261 |
| sl10756 | G0:0051188 | <1e-4 | ssr2047 | G0:0008150 | <1e-4 | sl11192 | G0:0046907 | <1e-4 | sl11123 | G0:0022857 | <1e-4 | ssr2754 | G0:0017111 | 0.1261 |
| slr0581 | G0:0052188 | <1e-4 | slr1977 | G0:0042180 | <1e-4 | slr1168 | G0:0051171 | <1e-4 | sl11542 | G0:0022836 | <1e-4 | sl11352 | G0:0017111 | 0.1261 |
| slr0211 | G0:0065007 | <1e-4 | sl11939 | G0:0009263 | <1e-4 | slr1419 | G0:0009987 | <1e-4 | slr0376 | G0:0043167 | <1e-4 | slr1288 | G0:0017111 | 0.1261 |
| sl11956 | G0:0044281 | <1e-4 | ssr7093 | G0:0031323 | <1e-4 | sl10625 | G0:0019637 | <1e-4 | slr0642 | G0:0016462 | <1e-4 | ss13382 | G0:0017111 | 0.1261 |
| slr0148 | G0:0044260 | <1e-4 | sl10301 | G0:0006811 | <1e-4 | sl10645 | G0:0031640 | <1e-4 | sl17034 | G0:0008171 | <1e-4 | slr1287 | G0:0017111 | 0.1261 |
| sl10225 | G0:0042455 | <1e-4 | slr1053 | G0:0071842 | <1e-4 | sl10532 | G0:0043170 | <1e-4 | slr0423 | G0:0015267 | <1e-4 | sl11411 | G0:0017111 | 0.1261 |
| sl11372 | G0:0044275 | <1e-4 | sl11006 | G0:0034660 | <1e-4 | slr5016 | G0:0009117 | <1e-4 | sl10827 | G0:0015405 | <1e-4 | sl11956 | G0:0017111 | 0.1261 |
| sl11884 | G0:0080090 | <1e-4 | slr5126 | G0:0044248 | <1e-4 | sl10066 | G0:0008610 | <1e-4 | slr1519 | G0:0022832 | <1e-4 | sl11021 | G0:0017111 | 0.1261 |
| sl11132 | G0:0022607 | <1e-4 | sl10189 | G0:0006220 | <1e-4 | slr1767 | G0:0006163 | <1e-4 | ss11520 | G0:0008171 | <1e-4 | slr1074 | G0:0017111 | 0.1261 |
| sl10147 | G0:0009199 | <1e-4 | slr0468 | G0:0044260 | <1e-4 | slr0103 | G0:0009165 | <1e-4 | sl11660 | G0:0015291 | <1e-4 | slr0981 | G0:0017111 | 0.1261 |
| sl17050 | G0:0051246 | <1e-4 | sl10802 | G0:0072521 | <1e-4 | sl11761 | G0:0044106 | <1e-4 | ss10483 | G0:0015077 | <1e-4 | slr1082 | G0:0017111 | 0.1261 |
| slr5073 | G0:0071496 | <1e-4 | sl11381 | G0:0034654 | <1e-4 | sl10007 | G0:0051818 | <1e-4 | slr0813 | G0:0016746 | <1e-4 | sl10141 | G0:0017111 | 0.1261 |
| sl10394 | G0:0006793 | <1e-4 | slr1107 | G0:0051347 | <1e-4 | sl10103 | G0:0051171 | <1e-4 | sl11586 | G0:0008171 | <1e-4 | slr0962 | G0:0017111 | 0.1261 |
| sl10350 | G0:0034641 | <1e-4 | ssr6079 | G0:0051716 | <1e-4 | slr0013 | G0:0046907 | <1e-4 | slr1070 | G0:0016462 | <1e-4 | slr0169 | G0:0017111 | 0.1261 |
| sl11006 | G0:0042451 | <1e-4 | slr2101 | G0:0090304 | <1e-4 | sl10448 | G0:0048518 | <1e-4 | sl11715 | G0:0015291 | <1e-4 | slr1128 | G0:0017111 | 0.1261 |
| ssr2754 | G0:0044248 | <1e-4 | sl17087 | G0:0022607 | <1e-4 | ss17007 | G0:0006721 | <1e-4 | slr0060 | G0:0016462 | <1e-4 | sl11950 | G0:0017111 | 0.1261 |
| slr0364 | G0:0050801 | <1e-4 | sl10909 | G0:0051818 | <1e-4 | slr0431 | G0:0051234 | <1e-4 | slr0145 | G0:0015293 | <1e-4 | sl11225 | G0:0017111 | 0.1261 |
| slr0876 | G0:0009893 | <1e-4 | sl11563 | G0:0071842 | <1e-4 | ssr6089 | G0:0009123 | <1e-4 | slr5116 | G0:0022857 | <1e-4 | slr1033 | G0:0017111 | 0.1261 |
| sl10253 | G0:0065007 | <1e-4 | slr0038 | G0:0071841 | <1e-4 | slr1437 | G0:0019222 | <1e-4 | ss10350 | G0:0016817 | <1e-4 | slr7024 | G0:0017111 | 0.1261 |
| sl11219 | G0:0080090 | <1e-4 | slr0521 | G0:0046483 | <1e-4 | sl11193 | G0:0009057 | <1e-4 | sl10837 | G0:0042623 | <1e-4 | slr0729 | G0:0017111 | 0.1261 |
| sl18019 | G0:0006732 | <1e-4 | slr0784 | G0:0051188 | <1e-4 | sl11304 | G0:0042180 | <1e-4 | slr1927 | G0:0042623 | <1e-4 | slr1070 | G0:0017111 | 0.1261 |
| sl10168 | G0:0043933 | <1e-4 | sl16052 | G0:0072528 | <1e-4 | slr6063 | G0:0044271 | <1e-4 | slr1544 | G0:0022857 | <1e-4 | sl10827 | G0:0017111 | 0.1261 |
| sl17067 | G0:0006733 | <1e-4 | sl11201 | G0:0045184 | <1e-4 | slr0667 | G0:0044260 | <1e-4 | sl11455 | G0:0003674 | <1e-4 | slr1940 | G0:0017111 | 0.1261 |
| slr0509 | G0:0006066 | <1e-4 | slr2060 | G0:0051188 | <1e-4 | slr0579 | G0:0009987 | <1e-4 | sl10811 | G0:0022832 | <1e-4 | slr0483 | G0:0017111 | 0.1261 |
| sl10614 | G0:0006066 | <1e-4 | ssl3615 | G0:0044283 | <1e-4 | slr1128 | G0:0009132 | <1e-4 | ssr5120 | G0:0043492 | <1e-4 | ssr1552 | G0:0017111 | 0.1261 |
| slr0887 | G0:0019637 | <1e-4 | sg10001 | G0:0071840 | <1e-4 | sl11956 | G0:0043412 | <1e-4 | slr0364 | G0:0060089 | <1e-4 | ss10483 | G0:0017111 | 0.1261 |
| ssr1766 | G0:0009057 | <1e-4 | sl11119 | G0:0010468 | <1e-4 | sl11763 | G0:0006163 | <1e-4 | slr5127 | G0:0015399 | <1e-4 | sl11054 | G0:0017111 | 0.1261 |
| sl11396 | G0:0072528 | <1e-4 | slr0885 | G0:0046483 | <1e-4 | sl18012 | G0:0051186 | <1e-4 | slr2073 | G0:0022836 | <1e-4 | sl10595 | G0:0017111 | 0.1261 |
| sl10871 | G0:0050794 | <1e-4 | sl11526 | G0:0080090 | <1e-4 | slr1493 | G0:0019362 | <1e-4 | slr1507 | G0:0016818 | <1e-4 | slr1762 | G0:0017111 | 0.1261 |
| slr2125 | G0:0051234 | <1e-4 | slr5017 | G0:0065007 | <1e-4 | sl10268 | G0:0034660 | <1e-4 | slr0650 | G0:0016462 | <1e-4 | sl11251 | G0:0017111 | 0.1261 |
| sl11738 | G0:0043170 | <1e-4 | slr0619 | G0:0019752 | <1e-4 | slr1572 | G0:0001932 | <1e-4 | sl10552 | G0:0022838 | <1e-4 | slr0104 | G0:0017111 | 0.1261 |
| slr0366 | G0:0006732 | <1e-4 | sl10861 | G0:0060255 | <1e-4 | sl11378 | G0:0008150 | <1e-4 | ss15045 | G0:0015399 | <1e-4 | slr0111 | G0:0017111 | 0.1261 |

|          |            |       |         |            |       |          |            |       |         |            |       |         |            |        |
|----------|------------|-------|---------|------------|-------|----------|------------|-------|---------|------------|-------|---------|------------|--------|
| slr15047 | G0:0044282 | <1e-4 | slr1186 | G0:0016054 | <1e-4 | slr1261  | G0:0006082 | <1e-4 | slr5101 | G0:0043492 | <1e-4 | slr0887 | G0:0017111 | 0.1261 |
| slr1230  | G0:0022607 | <1e-4 | ssl3142 | G0:0046128 | <1e-4 | slr1169  | G0:0046483 | <1e-4 | sl10328 | G0:0005342 | <1e-4 | sl10147 | G0:0017111 | 0.1261 |
| slr0479  | G0:0022411 | <1e-4 | ssr1552 | G0:0009144 | <1e-4 | slr0876  | G0:0006220 | <1e-4 | sl15004 | G0:0022857 | <1e-4 | sl10180 | G0:0017111 | 0.1261 |
| sl11934  | G0:0051347 | <1e-4 | slr5037 | G0:0048878 | <1e-4 | sl11380  | G0:0072528 | <1e-4 | ssl2138 | G0:0005342 | <1e-4 | slr2115 | G0:0017111 | 0.1261 |
| sl12011  | G0:0009987 | <1e-4 | slr0613 | G0:0009987 | <1e-4 | sl10775  | G0:0009309 | <1e-4 | slr1541 | G0:0016741 | <1e-4 | slr0957 | G0:0017111 | 0.1261 |
| slr0407  | G0:0044275 | <1e-4 | sl10496 | G0:0052188 | <1e-4 | slr0423  | G0:0006220 | <1e-4 | sl10314 | G0:0042623 | <1e-4 | slr1303 | G0:0017111 | 0.1261 |
| ssr6002  | G0:0009150 | <1e-4 | slr6022 | G0:0043648 | <1e-4 | sl11954  | G0:0022607 | <1e-4 | sl10543 | G0:0016741 | <1e-4 | sl11040 | G0:0017111 | 0.1261 |
| slr0967  | G0:0080090 | <1e-4 | sl10783 | G0:0080090 | <1e-4 | ssr7017  | G0:0016052 | <1e-4 | sl11241 | G0:0022891 | <1e-4 | slr0060 | G0:0017111 | 0.1261 |
| slr0108  | G0:0071841 | <1e-4 | sl10749 | G0:0009124 | <1e-4 | sl10068  | G0:0044260 | <1e-4 | slr2018 | G0:0043167 | <1e-4 | ssl8008 | G0:0017111 | 0.1261 |
| slr1774  | G0:0048523 | <1e-4 | sl11158 | G0:0046907 | <1e-4 | slr0207  | G0:0072522 | <1e-4 | slr7060 | G0:0016746 | <1e-4 | slr0596 | G0:0017111 | 0.1261 |
| slr2025  | G0:0034654 | <1e-4 | slr6091 | G0:0051171 | <1e-4 | sl10359  | G0:0071841 | <1e-4 | slr1768 | G0:0015267 | <1e-4 | slr1169 | G0:0017111 | 0.1261 |
| sl10355  | G0:0055086 | <1e-4 | sl10242 | G0:0009199 | <1e-4 | slr6021  | G0:0072522 | <1e-4 | ssr2972 | G0:0060089 | <1e-4 | slr1852 | G0:0017111 | 0.1261 |
| sl11304  | G0:0006631 | <1e-4 | slr0489 | G0:0016052 | <1e-4 | sl10647  | G0:0072524 | <1e-4 | sl10939 | G0:0015267 | <1e-4 | slr2048 | G0:0017111 | 0.1261 |
| sl11749  | G0:0006631 | <1e-4 | slr1068 | G0:0006720 | <1e-4 | ssl7039  | G0:0043170 | <1e-4 | ssl3451 | G0:0022890 | <1e-4 | slr0455 | G0:0017111 | 0.1261 |
| ssr3402  | G0:0009117 | <1e-4 | slr6038 | G0:0072527 | <1e-4 | sl11272  | G0:0043648 | <1e-4 | ssl3451 | G0:0015399 | <1e-4 | sl10225 | G0:0017111 | 0.1261 |
| ssl1972  | G0:0006766 | <1e-4 | slr0610 | G0:0044260 | <1e-4 | slr1956  | G0:0006732 | <1e-4 | ssr2848 | G0:0022857 | <1e-4 | sl10623 | G0:0017111 | 0.1261 |
| slr1619  | G0:0009057 | <1e-4 | slr0404 | G0:0006220 | <1e-4 | slr1944  | G0:0009124 | <1e-4 | sl11940 | G0:0016746 | <1e-4 | sl10564 | G0:0017111 | 0.1261 |
| sl10505  | G0:0006721 | <1e-4 | slr0601 | G0:0006721 | <1e-4 | ssr3409  | G0:0033013 | <1e-4 | sl10647 | G0:0016746 | <1e-4 | slr1862 | G0:0017111 | 0.1261 |
| ssr1552  | G0:0006631 | <1e-4 | slr1307 | G0:0034654 | <1e-4 | slr1773  | G0:0006766 | <1e-4 | ssr3572 | G0:0022803 | <1e-4 | slr1209 | G0:0017111 | 0.1261 |
| slr7058  | G0:0009144 | <1e-4 | slr0712 | G0:0006576 | <1e-4 | sl11380  | G0:0051186 | <1e-4 | sl10524 | G0:0005342 | <1e-4 | slr1895 | G0:0017111 | 0.1261 |
| slr1183  | G0:0090304 | <1e-4 | slr0887 | G0:0006720 | <1e-4 | slr1660  | G0:0034660 | <1e-4 | slr2115 | G0:0022857 | <1e-4 | sl10359 | G0:0017111 | 0.1261 |
| slr1618  | G0:0048522 | <1e-4 | ssl2471 | G0:0080090 | <1e-4 | slr1472  | G0:0051171 | <1e-4 | sl15047 | G0:0060089 | <1e-4 | slr0605 | G0:0003676 | 0.1243 |
| slr1342  | G0:0016053 | <1e-4 | slr0204 | G0:0090304 | <1e-4 | slr1168  | G0:0044255 | <1e-4 | slr1442 | G0:0015077 | <1e-4 | sl11938 | G0:0003676 | 0.1243 |
| slr0169  | G0:0050794 | <1e-4 | sl11285 | G0:0071842 | <1e-4 | sl10449  | G0:0006720 | <1e-4 | ssl5025 | G0:0016462 | <1e-4 | slr0650 | G0:0003676 | 0.1243 |
| sl11675  | G0:0006793 | <1e-4 | slr0059 | G0:0044260 | <1e-4 | slr1906  | G0:0051188 | <1e-4 | slr1577 | G0:0016746 | <1e-4 | slr1053 | G0:0003676 | 0.1243 |
| slr7096  | G0:0044003 | <1e-4 | slr1616 | G0:0042451 | <1e-4 | sl11203  | G0:0050801 | <1e-4 | slr1062 | G0:0022891 | <1e-4 | ssl0739 | G0:0003676 | 0.1243 |
| slr1566  | G0:0009165 | <1e-4 | slr0232 | G0:0006753 | <1e-4 | ssl3573  | G0:0009309 | <1e-4 | slr1419 | G0:0042623 | <1e-4 | sl10359 | G0:0003676 | 0.1243 |
| slr1753  | G0:0043170 | <1e-4 | sl18035 | G0:0051171 | <1e-4 | slr0147  | G0:0072521 | <1e-4 | slr0196 | G0:0022890 | <1e-4 | slr2125 | G0:0003676 | 0.1243 |
| slr1168  | G0:0044275 | <1e-4 | sl11203 | G0:0060255 | <1e-4 | sl115132 | G0:0051818 | <1e-4 | slr0145 | G0:0022857 | <1e-4 | slr1852 | G0:0003676 | 0.1243 |
| sl11696  | G0:0009117 | <1e-4 | slr1074 | G0:0022411 | <1e-4 | slr2049  | G0:0050801 | <1e-4 | sl11659 | G0:0022803 | <1e-4 | sl10141 | G0:0003676 | 0.1243 |
| sl10803  | G0:0016052 | <1e-4 | slr5017 | G0:0043549 | <1e-4 | sl11004  | G0:0009259 | <1e-4 | slr0960 | G0:0008171 | <1e-4 | sl10737 | G0:0003676 | 0.1243 |
| ssl3451  | G0:0006753 | <1e-4 | sl10098 | G0:0019362 | <1e-4 | ssl0788  | G0:0071840 | <1e-4 | sl10762 | G0:0016462 | <1e-4 | slr1541 | G0:0003676 | 0.1243 |
| sl10858  | G0:0009260 | <1e-4 | slr1493 | G0:0009987 | <1e-4 | sl12015  | G0:0042180 | <1e-4 | sl17077 | G0:0005342 | <1e-4 | slr0104 | G0:0003676 | 0.1243 |
| slr0271  | G0:0009123 | <1e-4 | slr0806 | G0:0080090 | <1e-4 | slr1638  | G0:0046907 | <1e-4 | slr1676 | G0:0022838 | <1e-4 | ssr1114 | G0:0003676 | 0.1243 |
| slr0299  | G0:0044260 | <1e-4 | slr0505 | G0:0009165 | <1e-4 | sl11638  | G0:0050789 | <1e-4 | sl11060 | G0:0043492 | <1e-4 | slr0169 | G0:0003676 | 0.1243 |
| slr0586  | G0:0031326 | <1e-4 | ssr5020 | G0:0006066 | <1e-4 | ssl0483  | G0:0016052 | <1e-4 | sl15061 | G0:0043492 | <1e-4 | sl11399 | G0:0003676 | 0.1243 |
| slr0810  | G0:0009123 | <1e-4 | slr1790 | G0:0006721 | <1e-4 | slr1674  | G0:0006082 | <1e-4 | sl10449 | G0:0016817 | <1e-4 | sl10995 | G0:0003676 | 0.1243 |
| ssr6062  | G0:0048519 | <1e-4 | sl11834 | G0:0065007 | <1e-4 | slr0913  | G0:0009394 | <1e-4 | slr1600 | G0:0022891 | <1e-4 | sl10837 | G0:0003676 | 0.1243 |
| slr1082  | G0:0046164 | <1e-4 | sl11477 | G0:0046128 | <1e-4 | sl10424  | G0:0009123 | <1e-4 | ssr2047 | G0:0022890 | <1e-4 | slr0957 | G0:0003676 | 0.1243 |
| slr1170  | G0:0050801 | <1e-4 | slr1376 | G0:0042455 | <1e-4 | ssl1520  | G0:0019752 | <1e-4 | ssl0832 | G0:0016817 | <1e-4 | slr0654 | G0:0003676 | 0.1243 |
| sl10871  | G0:0043648 | <1e-4 | sl10048 | G0:0055086 | <1e-4 | slr6100  | G0:0044248 | <1e-4 | sl11775 | G0:0015405 | <1e-4 | sl11241 | G0:0003676 | 0.1243 |
| slr1025  | G0:0043933 | <1e-4 | ssl1552 | G0:0034654 | <1e-4 | sl12011  | G0:0034654 | <1e-4 | slr1565 | G0:0005342 | <1e-4 | slr0232 | G0:0003676 | 0.1243 |
| slr2038  | G0:0006753 | <1e-4 | sl11447 | G0:0009059 | <1e-4 | sl11446  | G0:0071841 | <1e-4 | slr8044 | G0:0015405 | <1e-4 | slr1762 | G0:0003676 | 0.1243 |
| ssl2064  | G0:0009892 | <1e-4 | slr5111 | G0:0006732 | <1e-4 | slr6045  | G0:0018130 | <1e-4 | slr1098 | G0:0022857 | <1e-4 | sl17065 | G0:0003676 | 0.1243 |
| ssr3570  | G0:0042180 | <1e-4 | slr1362 | G0:0031640 | <1e-4 | sl11942  | G0:0019362 | <1e-4 | sl10301 | G0:0022891 | <1e-4 | slr1895 | G0:0003676 | 0.1243 |
| sl10355  | G0:0009260 | <1e-4 | ssr3300 | G0:0044282 | <1e-4 | slr0637  | G0:0016054 | <1e-4 | slr6005 | G0:0003674 | <1e-4 | sl10888 | G0:0003676 | 0.1243 |
| sl10710  | G0:0006163 | <1e-4 | sl11632 | G0:0009150 | <1e-4 | slr0514  | G0:0009263 | <1e-4 | ssr3122 | G0:0022892 | <1e-4 | sl10188 | G0:0003676 | 0.1243 |
| slr1811  | G0:0006733 | <1e-4 | ssr5106 | G0:0048518 | <1e-4 | slr0680  | G0:0006220 | <1e-4 | sl10788 | G0:0015267 | <1e-4 | sl10156 | G0:0003676 | 0.1243 |
| sl11119  | G0:0033013 | <1e-4 | sl11715 | G0:0050789 | <1e-4 | sl10253  | G0:0006793 | <1e-4 | slr6080 | G0:0015291 | <1e-4 | sl10268 | G0:0003676 | 0.1243 |
| sl10781  | G0:0048522 | <1e-4 | ssr6024 | G0:0055086 | <1e-4 | slr1068  | G0:0008610 | <1e-4 | ssl7048 | G0:0015293 | <1e-4 | slr0053 | G0:0003676 | 0.1243 |
| sl11863  | G0:0006721 | <1e-4 | sl10688 | G0:0034641 | <1e-4 | sl11722  | G0:0044260 | <1e-4 | ssr6027 | G0:0060089 | <1e-4 | slr1413 | G0:0003676 | 0.1243 |
| sl10071  | G0:0033013 | <1e-4 | sl10659 | G0:0080090 | <1e-4 | slr1168  | G0:0055114 | <1e-4 | slr1417 | G0:0008171 | <1e-4 | slr1288 | G0:0003676 | 0.1243 |
| slr6094  | G0:0001932 | <1e-4 | slr1187 | G0:0006793 | <1e-4 | sl15034  | G0:0009308 | <1e-4 | sl10641 | G0:0015293 | <1e-4 | slr1240 | G0:0003676 | 0.1243 |
| sl10328  | G0:0043412 | <1e-4 | sl11163 | G0:0009144 | <1e-4 | ssl1520  | G0:0009260 | <1e-4 | ssl2996 | G0:0016818 | <1e-4 | sl10688 | G0:0003676 | 0.1243 |



|          |            |       |          |            |       |          |            |       |          |            |       |          |            |        |
|----------|------------|-------|----------|------------|-------|----------|------------|-------|----------|------------|-------|----------|------------|--------|
| sll1272  | G0:0055086 | <1e-4 | sll1995  | G0:0051179 | <1e-4 | slr0366  | G0:0050896 | <1e-4 | sll0309  | G0:0016462 | <1e-4 | slr2005  | G0:0003676 | 0.1243 |
| ssl5098  | G0:0048878 | <1e-4 | slr7011  | G0:0044282 | <1e-4 | slr2111  | G0:0044260 | <1e-4 | slr2018  | G0:0022832 | <1e-4 | sll1752  | G0:0003676 | 0.1243 |
| sll1541  | G0:0046128 | <1e-4 | sll0781  | G0:0006163 | <1e-4 | slr0728  | G0:0043412 | <1e-4 | ssl7039  | G0:0015077 | <1e-4 | sll1411  | G0:0003676 | 0.1243 |
| slr0957  | G0:0080090 | <1e-4 | sll10168 | G0:0046128 | <1e-4 | slr1425  | G0:0008150 | <1e-4 | ssl2803  | G0:0022891 | <1e-4 | slr1128  | G0:0003676 | 0.1243 |
| ssl5019  | G0:0080090 | <1e-4 | slr0575  | G0:0043648 | <1e-4 | sll11233 | G0:0006733 | <1e-4 | slr0765  | G0:0060089 | <1e-4 | sll1950  | G0:0003676 | 0.1243 |
| ssl5011  | G0:0006732 | <1e-4 | slr1033  | G0:0019751 | <1e-4 | sll1477  | G0:0051186 | <1e-4 | ssl1690  | G0:0042623 | <1e-4 | sll10180 | G0:0003676 | 0.1243 |
| sll0479  | G0:0019751 | <1e-4 | slr1261  | G0:0008150 | <1e-4 | slr0821  | G0:0072524 | <1e-4 | slr0109  | G0:0003674 | <1e-4 | sll0281  | G0:0003676 | 0.1243 |
| sll1583  | G0:0046128 | <1e-4 | sll10749 | G0:0005996 | <1e-4 | sll11054 | G0:0009059 | <1e-4 | sll10751 | G0:0022838 | <1e-4 | sll1925  | G0:0003676 | 0.1243 |
| sll1913  | G0:0016054 | <1e-4 | ssl5011  | G0:0016052 | <1e-4 | slr1464  | G0:0052111 | <1e-4 | slr7071  | G0:0015399 | <1e-4 | sll1251  | G0:0003676 | 0.1243 |
| slr1203  | G0:0009165 | <1e-4 | sll10149 | G0:0044248 | <1e-4 | sll11233 | G0:0009059 | <1e-4 | ssl5011  | G0:0016462 | <1e-4 | sll1240  | G0:0003676 | 0.1243 |
| slr6016  | G0:0033013 | <1e-4 | slr1951  | G0:0006721 | <1e-4 | slr1648  | G0:0046128 | <1e-4 | slr0978  | G0:0042623 | <1e-4 | sll10588 | G0:0003676 | 0.1243 |
| sll0286  | G0:0019222 | <1e-4 | slr0609  | G0:0006721 | <1e-4 | sll12011 | G0:0052188 | <1e-4 | sll10198 | G0:0016462 | <1e-4 | slr1303  | G0:0003676 | 0.1243 |
| slr1275  | G0:0048519 | <1e-4 | ssl6019  | G0:0005996 | <1e-4 | sll10984 | G0:0080090 | <1e-4 | slr1658  | G0:0015075 | <1e-4 | sll1582  | G0:0003676 | 0.1243 |
| sll10602 | G0:0051716 | <1e-4 | sll11163 | G0:0019219 | <1e-4 | slr1342  | G0:0001932 | <1e-4 | slr1530  | G0:0003674 | <1e-4 | slr0664  | G0:0003676 | 0.1243 |
| slr2110  | G0:0018130 | <1e-4 | sll10788 | G0:0009161 | <1e-4 | slr1970  | G0:0072522 | <1e-4 | sll1426  | G0:0003674 | <1e-4 | slr1999  | G0:0016787 | 0.1232 |
| slr6038  | G0:0019752 | <1e-4 | slr5073  | G0:0006066 | <1e-4 | slr1624  | G0:0044282 | <1e-4 | sll10443 | G0:0043167 | <1e-4 | sll10185 | G0:0016787 | 0.1232 |
| sll10298 | G0:0071842 | <1e-4 | slr0149  | G0:0006732 | <1e-4 | ssl6079  | G0:0044003 | <1e-4 | sll10198 | G0:0022838 | <1e-4 | ssl0352  | G0:0016787 | 0.1232 |
| slr5073  | G0:0006753 | <1e-4 | sll17047 | G0:0050794 | <1e-4 | slr0146  | G0:0009057 | <1e-4 | slr0104  | G0:0060089 | <1e-4 | slr0006  | G0:0016787 | 0.1232 |
| slr1593  | G0:0048522 | <1e-4 | ssl2060  | G0:0006631 | <1e-4 | sll10007 | G0:0034641 | <1e-4 | sll10763 | G0:0015267 | <1e-4 | slr1788  | G0:0016787 | 0.1232 |
| slr7010  | G0:0052188 | <1e-4 | slr0913  | G0:0045184 | <1e-4 | sll10508 | G0:0022411 | <1e-4 | slr6080  | G0:0043167 | <1e-4 | slr1210  | G0:0016787 | 0.1232 |
| ssl3129  | G0:0009117 | <1e-4 | sll11485 | G0:0043933 | <1e-4 | slr1179  | G0:0009132 | <1e-4 | sll10822 | G0:0043492 | <1e-4 | slr0845  | G0:0016787 | 0.1232 |
| slr2027  | G0:0080090 | <1e-4 | sll11247 | G0:0072524 | <1e-4 | slr0664  | G0:0022411 | <1e-4 | slr1365  | G0:0022832 | <1e-4 | ssl2787  | G0:0016787 | 0.1232 |
| sll1638  | G0:0043648 | <1e-4 | sll10508 | G0:0071554 | <1e-4 | slr1854  | G0:0043648 | <1e-4 | ssl2998  | G0:0016746 | <1e-4 | sll10785 | G0:0016787 | 0.1232 |
| sll10577 | G0:0009991 | <1e-4 | sll10761 | G0:0046164 | <1e-4 | sll11737 | G0:0051186 | <1e-4 | ssl1499  | G0:0016741 | <1e-4 | ssl3571  | G0:0016787 | 0.1232 |
| sll11681 | G0:0022607 | <1e-4 | slr1699  | G0:0006766 | <1e-4 | sll10225 | G0:0009308 | <1e-4 | slr0144  | G0:0008171 | <1e-4 | sll10355 | G0:0016787 | 0.1232 |
| slr7014  | G0:0042180 | <1e-4 | slr0269  | G0:0009141 | <1e-4 | slr11127 | G0:0006721 | <1e-4 | sll11785 | G0:0015291 | <1e-4 | ssl3122  | G0:0016787 | 0.1232 |
| slr0887  | G0:0051171 | <1e-4 | slr0852  | G0:0042180 | <1e-4 | sll10192 | G0:0009161 | <1e-4 | sll10436 | G0:0022838 | <1e-4 | slr1885  | G0:0016787 | 0.1232 |
| sll12006 | G0:0042455 | <1e-4 | sll15026 | G0:0009394 | <1e-4 | sll10286 | G0:0009132 | <1e-4 | slr1940  | G0:0043492 | <1e-4 | slr0668  | G0:0016787 | 0.1232 |
| sll10586 | G0:0051246 | <1e-4 | slr5101  | G0:0006066 | <1e-4 | slr1790  | G0:0009199 | <1e-4 | slr1915  | G0:0016818 | <1e-4 | ssl2439  | G0:0016787 | 0.1232 |
| slr1530  | G0:0043412 | <1e-4 | slr1363  | G0:0009165 | <1e-4 | sll10327 | G0:0006811 | <1e-4 | slr1425  | G0:0003674 | <1e-4 | slr1203  | G0:0016787 | 0.1232 |
| slr0147  | G0:0022607 | <1e-4 | sll11606 | G0:0055086 | <1e-4 | slr0728  | G0:0019751 | <1e-4 | sll11736 | G0:0015399 | <1e-4 | slr1593  | G0:0016787 | 0.1232 |
| sll11350 | G0:0019362 | <1e-4 | sll10997 | G0:0019752 | <1e-4 | ssl6083  | G0:0031326 | <1e-4 | slr1628  | G0:0016817 | <1e-4 | sll10780 | G0:0016787 | 0.1232 |
| ssl17021 | G0:0006066 | <1e-4 | sll18012 | G0:0071554 | <1e-4 | sll10355 | G0:0042180 | <1e-4 | slr1397  | G0:0015405 | <1e-4 | sll11830 | G0:0016787 | 0.1232 |
| slr0890  | G0:0006753 | <1e-4 | slr0271  | G0:0006811 | <1e-4 | ssl6062  | G0:0048522 | <1e-4 | slr2101  | G0:0016746 | <1e-4 | slr0144  | G0:0016787 | 0.1232 |
| slr1339  | G0:0051347 | <1e-4 | sll10661 | G0:0009165 | <1e-4 | slr5112  | G0:0048519 | <1e-4 | sll18033 | G0:0003674 | <1e-4 | sll11761 | G0:0016787 | 0.1232 |
| slr1577  | G0:0051818 | <1e-4 | ssl1417  | G0:0006220 | <1e-4 | slr1778  | G0:0048519 | <1e-4 | sll11751 | G0:0015405 | <1e-4 | sll10524 | G0:0016787 | 0.1232 |
| ssl7035  | G0:0006766 | <1e-4 | sll10188 | G0:0051188 | <1e-4 | slr0208  | G0:0048878 | <1e-4 | slr1565  | G0:0043167 | <1e-4 | slr0192  | G0:0016787 | 0.1232 |
| ssl2553  | G0:0042451 | <1e-4 | sll10863 | G0:0044271 | <1e-4 | slr0489  | G0:0031640 | <1e-4 | slr1704  | G0:0043167 | <1e-4 | slr0294  | G0:0016787 | 0.1232 |
| sll15067 | G0:0071841 | <1e-4 | ssl18039 | G0:0009059 | <1e-4 | sll10843 | G0:0043436 | <1e-4 | sll10763 | G0:0060089 | <1e-4 | slr1081  | G0:0016787 | 0.1232 |
| sll11552 | G0:0043412 | <1e-4 | ssl17046 | G0:0045184 | <1e-4 | slr1307  | G0:0043412 | <1e-4 | ssl2047  | G0:0016746 | <1e-4 | sll10982 | G0:0016787 | 0.1232 |
| sll15130 | G0:0060255 | <1e-4 | sll10218 | G0:0042180 | <1e-4 | slr1619  | G0:0006163 | <1e-4 | slr0981  | G0:0015293 | <1e-4 | slr1177  | G0:0016787 | 0.1232 |
| ssl1558  | G0:0048519 | <1e-4 | sll17069 | G0:0048522 | <1e-4 | sll11571 | G0:0043933 | <1e-4 | sll11447 | G0:0016817 | <1e-4 | sll11965 | G0:0016787 | 0.1232 |
| sll10160 | G0:0019637 | <1e-4 | sll15097 | G0:0006720 | <1e-4 | slr1790  | G0:0006576 | <1e-4 | slr0392  | G0:0015077 | <1e-4 | sll11954 | G0:0016787 | 0.1232 |
| sll11025 | G0:0051246 | <1e-4 | slr6088  | G0:0006721 | <1e-4 | ssl1300  | G0:0045184 | <1e-4 | slr0594  | G0:0022803 | <1e-4 | sll10066 | G0:0016787 | 0.1232 |
| slr0179  | G0:0019222 | <1e-4 | sll10911 | G0:0051179 | <1e-4 | sll11882 | G0:0034654 | <1e-4 | ssl2962  | G0:0022892 | <1e-4 | ssl2551  | G0:0016787 | 0.1232 |
| ssl15064 | G0:0009259 | <1e-4 | slr0334  | G0:0043170 | <1e-4 | slr6049  | G0:0048522 | <1e-4 | slr1045  | G0:0015405 | <1e-4 | slr0872  | G0:0016787 | 0.1232 |
| sll11730 | G0:0009309 | <1e-4 | slr8014  | G0:0009263 | <1e-4 | slr1071  | G0:0009165 | <1e-4 | ssl5008  | G0:0022891 | <1e-4 | slr1667  | G0:0016787 | 0.1232 |
| slr0921  | G0:0050789 | <1e-4 | sll11092 | G0:0048519 | <1e-4 | sll15028 | G0:0044281 | <1e-4 | slr1862  | G0:0016817 | <1e-4 | slr1275  | G0:0016787 | 0.1232 |
| slr1886  | G0:0051716 | <1e-4 | slr1384  | G0:0019362 | <1e-4 | slr1999  | G0:0009144 | <1e-4 | slr6039  | G0:0015075 | <1e-4 | slr1572  | G0:0016787 | 0.1232 |
| ssl2554  | G0:0080090 | <1e-4 | sll11692 | G0:0009161 | <1e-4 | slr0039  | G0:0034654 | <1e-4 | sll10985 | G0:0022857 | <1e-4 | slr1778  | G0:0016787 | 0.1232 |
| slr0111  | G0:0009260 | <1e-4 | sll10788 | G0:0042180 | <1e-4 | slr1940  | G0:0080090 | <1e-4 | sll11477 | G0:0015405 | <1e-4 | slr0482  | G0:0016787 | 0.1232 |
| slr1573  | G0:0009892 | <1e-4 | sll11775 | G0:0090304 | <1e-4 | sll17070 | G0:0050801 | <1e-4 | ssl1792  | G0:0015267 | <1e-4 | slr1437  | G0:0016787 | 0.1232 |
| sll11698 | G0:0006753 | <1e-4 | sll11447 | G0:0051716 | <1e-4 | ssl10787 | G0:0006811 | <1e-4 | sll11477 | G0:0008171 | <1e-4 | sll10085 | G0:0016787 | 0.1232 |
| ssl18028 | G0:0071554 | <1e-4 | sll11784 | G0:0046483 | <1e-4 | sll11265 | G0:0009142 | <1e-4 | slr1385  | G0:0016746 | <1e-4 | slr1266  | G0:0016787 | 0.1232 |

|         |            |       |         |            |       |         |            |       |         |            |       |         |            |        |
|---------|------------|-------|---------|------------|-------|---------|------------|-------|---------|------------|-------|---------|------------|--------|
| sl10328 | GO:0009263 | <1e-4 | slr1513 | GO:0034654 | <1e-4 | ss11046 | GO:0009991 | <1e-4 | sl11658 | GO:0022832 | <1e-4 | sl10243 | GO:0016787 | 0.1232 |
| slr1774 | GO:0051188 | <1e-4 | sl11925 | GO:0080090 | <1e-4 | sl11606 | GO:0006793 | <1e-4 | slr1222 | GO:0015291 | <1e-4 | sl10532 | GO:0016787 | 0.1232 |
| slr5112 | GO:0019219 | <1e-4 | sl10174 | GO:0016053 | <1e-4 | sl11162 | GO:0006721 | <1e-4 | sl11060 | GO:0003674 | <1e-4 | sl10309 | GO:0016787 | 0.1232 |
| ssr2843 | GO:0043412 | <1e-4 | slr0971 | GO:0006732 | <1e-4 | slr5017 | GO:0009141 | <1e-4 | slr1047 | GO:0022892 | <1e-4 | slr2121 | GO:0016787 | 0.1232 |
| slr0806 | GO:0009263 | <1e-4 | slr1143 | GO:0006091 | <1e-4 | slr1616 | GO:0006733 | <1e-4 | slr0730 | GO:0043167 | <1e-4 | slr0103 | GO:0016787 | 0.1232 |
| ssr6020 | GO:0090304 | <1e-4 | sl10072 | GO:0046128 | <1e-4 | sl10572 | GO:0050801 | <1e-4 | slr0076 | GO:0022832 | <1e-4 | slr0364 | GO:0016787 | 0.1232 |
| slr1616 | GO:0042180 | <1e-4 | ssr7072 | GO:0071841 | <1e-4 | sl11240 | GO:0009394 | <1e-4 | slr0871 | GO:0015267 | <1e-4 | sl11613 | GO:0016787 | 0.1232 |
| slr0232 | GO:0006720 | <1e-4 | slr1142 | GO:0006732 | <1e-4 | sl11272 | GO:0065007 | <1e-4 | slr0184 | GO:0022892 | <1e-4 | slr0723 | GO:0016787 | 0.1232 |
| ssr3341 | GO:0043412 | <1e-4 | slr0654 | GO:0008150 | <1e-4 | slr0914 | GO:0042180 | <1e-4 | sl11765 | GO:0022803 | <1e-4 | sl10198 | GO:0016787 | 0.1232 |
| sl10909 | GO:0050789 | <1e-4 | slr0264 | GO:0044271 | <1e-4 | slr0169 | GO:0072524 | <1e-4 | sl11119 | GO:0022890 | <1e-4 | sl11315 | GO:0016787 | 0.1232 |
| slr0667 | GO:0044271 | <1e-4 | slr1851 | GO:0009144 | <1e-4 | slr0108 | GO:0043933 | <1e-4 | slr1258 | GO:0003674 | <1e-4 | slr2122 | GO:0016787 | 0.1232 |
| sl11652 | GO:0071496 | <1e-4 | slr1612 | GO:0009889 | <1e-4 | slr1660 | GO:0001932 | <1e-4 | sl11926 | GO:0022832 | <1e-4 | sl11563 | GO:0016787 | 0.1232 |
| slr1593 | GO:0009987 | <1e-4 | slr6094 | GO:0051179 | <1e-4 | ssr6086 | GO:0071496 | <1e-4 | sl10282 | GO:0016818 | <1e-4 | sl10456 | GO:0016787 | 0.1232 |
| slr0598 | GO:0044275 | <1e-4 | sl17090 | GO:0055082 | <1e-4 | slr0039 | GO:0009141 | <1e-4 | ssr2439 | GO:0016818 | <1e-4 | slr2073 | GO:0016787 | 0.1232 |
| slr1056 | GO:0044248 | <1e-4 | sl10863 | GO:0008150 | <1e-4 | slr0408 | GO:0051179 | <1e-4 | slr0317 | GO:0016817 | <1e-4 | slr2144 | GO:0016787 | 0.1232 |
| sl15046 | GO:0006720 | <1e-4 | sl11186 | GO:0010468 | <1e-4 | sl10513 | GO:0019222 | <1e-4 | sl10022 | GO:0015399 | <1e-4 | sl11736 | GO:0016787 | 0.1232 |
| sl10198 | GO:0051234 | <1e-4 | slr1241 | GO:0006631 | <1e-4 | slr0852 | GO:0090304 | <1e-4 | sg10001 | GO:0016818 | <1e-4 | sl11835 | GO:0016787 | 0.1232 |
| sl11306 | GO:0019219 | <1e-4 | ssr6002 | GO:0044281 | <1e-4 | slr1547 | GO:0022607 | <1e-4 | slr1114 | GO:0005342 | <1e-4 | slr1648 | GO:0016787 | 0.1232 |
| sl10062 | GO:0006720 | <1e-4 | ss11552 | GO:0048878 | <1e-4 | sl18027 | GO:0046128 | <1e-4 | sl10456 | GO:0015405 | <1e-4 | slr0770 | GO:0016787 | 0.1232 |
| slr1572 | GO:0044255 | <1e-4 | ssr5092 | GO:0050794 | <1e-4 | slr1956 | GO:0033013 | <1e-4 | sl11926 | GO:0016462 | <1e-4 | ssr2755 | GO:0016787 | 0.1232 |
| sl10787 | GO:0009889 | <1e-4 | sl10647 | GO:0071496 | <1e-4 | sl15004 | GO:0034641 | <1e-4 | slr1507 | GO:0015291 | <1e-4 | slr1913 | GO:0016787 | 0.1232 |
| sl11660 | GO:0006066 | <1e-4 | slr1276 | GO:0072521 | <1e-4 | slr0148 | GO:0044255 | <1e-4 | slr1438 | GO:0015075 | <1e-4 | ss12065 | GO:0016787 | 0.1232 |
| sl10609 | GO:0051716 | <1e-4 | ss11577 | GO:0009260 | <1e-4 | slr1363 | GO:0019219 | <1e-4 | slr2070 | GO:0022838 | <1e-4 | slr1638 | GO:0016787 | 0.1232 |
| ssr2848 | GO:0051171 | <1e-4 | slr0645 | GO:0010468 | <1e-4 | slr7098 | GO:0009262 | <1e-4 | sl11239 | GO:0005342 | <1e-4 | slr0348 | GO:0016787 | 0.1232 |
| slr0364 | GO:0009132 | <1e-4 | sl10191 | GO:0006631 | <1e-4 | ssr0109 | GO:0031640 | <1e-4 | slr6049 | GO:0016462 | <1e-4 | sl10237 | GO:0016787 | 0.1232 |
| sl11834 | GO:0072522 | <1e-4 | slr6012 | GO:0051246 | <1e-4 | slr1780 | GO:0050789 | <1e-4 | sl15046 | GO:0022891 | <1e-4 | sl10756 | GO:0016787 | 0.1232 |
| sl11726 | GO:0043412 | <1e-4 | slr0914 | GO:0019751 | <1e-4 | slr0325 | GO:0051179 | <1e-4 | sl10861 | GO:0015291 | <1e-4 | sl10280 | GO:0016787 | 0.1232 |
| slr0199 | GO:0005996 | <1e-4 | slr1462 | GO:0010468 | <1e-4 | sl11380 | GO:0044255 | <1e-4 | ssr8013 | GO:0003674 | <1e-4 | sl10445 | GO:0000166 | 0.1214 |
| slr1623 | GO:0044271 | <1e-4 | ssr2201 | GO:0006066 | <1e-4 | slr1163 | GO:0019751 | <1e-4 | sl11052 | GO:0015077 | <1e-4 | sl11318 | GO:0005215 | 0.1213 |
| slr7011 | GO:0009260 | <1e-4 | slr1071 | GO:0044106 | <1e-4 | sl11495 | GO:0044275 | <1e-4 | sl11218 | GO:0022803 | <1e-4 | slr1918 | GO:0005215 | 0.1213 |
| ss13142 | GO:0034641 | <1e-4 | slr1537 | GO:0046164 | <1e-4 | slr1668 | GO:0019751 | <1e-4 | sl11247 | GO:0016462 | <1e-4 | sl11601 | GO:0005215 | 0.1213 |
| ss15114 | GO:0034654 | <1e-4 | sl11527 | GO:0046164 | <1e-4 | sl11659 | GO:0048878 | <1e-4 | sl18002 | GO:0015405 | <1e-4 | slr0250 | GO:0005215 | 0.1213 |
| slr1918 | GO:0051234 | <1e-4 | slr6039 | GO:0009124 | <1e-4 | sl16054 | GO:0051186 | <1e-4 | sl11858 | GO:0022857 | <1e-4 | sl11219 | GO:0005215 | 0.1213 |
| sl11730 | GO:0009259 | <1e-4 | sl10933 | GO:0052111 | <1e-4 | sl11352 | GO:0044106 | <1e-4 | slr1915 | GO:0016746 | <1e-4 | sl12006 | GO:0005215 | 0.1213 |
| ss11417 | GO:0016054 | <1e-4 | sl11638 | GO:0006163 | <1e-4 | sl11411 | GO:0048522 | <1e-4 | sl10543 | GO:0043167 | <1e-4 | slr0243 | GO:0005215 | 0.1213 |
| ss15100 | GO:0010468 | <1e-4 | slr6073 | GO:0006082 | <1e-4 | ss11417 | GO:0009394 | <1e-4 | slr5053 | GO:0016462 | <1e-4 | slr0476 | GO:0005215 | 0.1213 |
| sl10156 | GO:0044248 | <1e-4 | slr0144 | GO:0009991 | <1e-4 | sl11086 | GO:0009991 | <1e-4 | ss11004 | GO:0016462 | <1e-4 | slr0871 | GO:0005215 | 0.1213 |
| ssr2781 | GO:0016053 | <1e-4 | slr0702 | GO:0006576 | <1e-4 | ss10109 | GO:0009892 | <1e-4 | slr1866 | GO:0022803 | <1e-4 | ssr1698 | GO:0005215 | 0.1213 |
| sl11307 | GO:0048519 | <1e-4 | slr0545 | GO:0034641 | <1e-4 | slr6104 | GO:0045184 | <1e-4 | ssr6079 | GO:0060089 | <1e-4 | slr0211 | GO:0005215 | 0.1213 |
| slr1546 | GO:0010468 | <1e-4 | slr6075 | GO:0072521 | <1e-4 | slr1576 | GO:0034641 | <1e-4 | sl11608 | GO:0022803 | <1e-4 | slr1917 | GO:0005215 | 0.1213 |
| ss15095 | GO:0042451 | <1e-4 | sl11373 | GO:0006576 | <1e-4 | ssr1114 | GO:0006811 | <1e-4 | slr1612 | GO:0015399 | <1e-4 | slr0503 | GO:0005215 | 0.1213 |
| ssr0657 | GO:0043170 | <1e-4 | ss10483 | GO:0043170 | <1e-4 | slr6104 | GO:0072521 | <1e-4 | slr1417 | GO:0016818 | <1e-4 | sl11715 | GO:0005215 | 0.1213 |
| sl10703 | GO:0009132 | <1e-4 | slr1530 | GO:0008610 | <1e-4 | slr6104 | GO:0006721 | <1e-4 | sl10269 | GO:0016741 | <1e-4 | sl10743 | GO:0005215 | 0.1213 |
| sl10577 | GO:0006220 | <1e-4 | slr1101 | GO:0050801 | <1e-4 | ss17074 | GO:0009309 | <1e-4 | ssr2962 | GO:0015293 | <1e-4 | sl10296 | GO:0005215 | 0.1213 |
| sl10449 | GO:0009142 | <1e-4 | slr1958 | GO:0046907 | <1e-4 | sl10265 | GO:0051171 | <1e-4 | slr1187 | GO:0005342 | <1e-4 | slr0423 | GO:0005215 | 0.1213 |
| slr0885 | GO:0044260 | <1e-4 | sl10071 | GO:0006082 | <1e-4 | sl10853 | GO:0044283 | <1e-4 | sl10909 | GO:0015291 | <1e-4 | sl11942 | GO:0005215 | 0.1213 |
| slr0341 | GO:0010556 | <1e-4 | slr1235 | GO:0043648 | <1e-4 | ssr2843 | GO:0022411 | <1e-4 | slr0404 | GO:0015077 | <1e-4 | ssr1499 | GO:0016787 | 0.1203 |
| ss11263 | GO:0018130 | <1e-4 | sl11442 | GO:0071840 | <1e-4 | sl11193 | GO:0071496 | <1e-4 | ssr0109 | GO:0022892 | <1e-4 | sl11757 | GO:0016787 | 0.1203 |
| slr1082 | GO:0019222 | <1e-4 | slr0516 | GO:0006082 | <1e-4 | slr6080 | GO:0043933 | <1e-4 | slr6031 | GO:0022832 | <1e-4 | slr1468 | GO:0016787 | 0.1203 |
| slr0456 | GO:0031326 | <1e-4 | sl10703 | GO:0072521 | <1e-4 | slr6063 | GO:0051716 | <1e-4 | slr6031 | GO:0005342 | <1e-4 | ssr2912 | GO:0016787 | 0.1203 |
| ssr2615 | GO:0019222 | <1e-4 | slr0362 | GO:0008150 | <1e-4 | slr0318 | GO:0006631 | <1e-4 | slr1066 | GO:0022838 | <1e-4 | slr1178 | GO:0016787 | 0.1203 |
| ssr6062 | GO:0046907 | <1e-4 | slr0509 | GO:0031323 | <1e-4 | sl11671 | GO:0016054 | <1e-4 | ssr1698 | GO:0022890 | <1e-4 | slr0148 | GO:0016787 | 0.1203 |
| ss17021 | GO:0009394 | <1e-4 | sl10443 | GO:0009308 | <1e-4 | sl11938 | GO:0009987 | <1e-4 | sl10787 | GO:0015075 | <1e-4 | slr6004 | GO:0016787 | 0.1203 |
| slr1674 | GO:0044106 | <1e-4 | sl10381 | GO:0043648 | <1e-4 | sl10181 | GO:0006732 | <1e-4 | sl11691 | GO:0042623 | <1e-4 | slr7013 | GO:0016787 | 0.1203 |

|          |            |       |          |            |       |          |            |       |          |            |       |          |            |        |
|----------|------------|-------|----------|------------|-------|----------|------------|-------|----------|------------|-------|----------|------------|--------|
| ss12814  | G0:0009144 | <1e-4 | slr1493  | G0:0031326 | <1e-4 | ssr6085  | G0:0044275 | <1e-4 | ss15031  | G0:0022836 | <1e-4 | sl11396  | G0:0016787 | 0.1203 |
| sl11749  | G0:0010556 | <1e-4 | sl11651  | G0:0044282 | <1e-4 | slr0607  | G0:0044271 | <1e-4 | slr0348  | G0:0016817 | <1e-4 | ss15095  | G0:0016787 | 0.1203 |
| slr1177  | G0:0071554 | <1e-4 | sl110584 | G0:0046483 | <1e-4 | slr1315  | G0:0048518 | <1e-4 | slr6008  | G0:0015291 | <1e-4 | sl110751 | G0:0016787 | 0.1203 |
| ssr0102  | G0:0048878 | <1e-4 | sl111049 | G0:0009987 | <1e-4 | sl11863  | G0:0006793 | <1e-4 | sl110982 | G0:0022803 | <1e-4 | slr1863  | G0:0016787 | 0.1203 |
| slr1173  | G0:0009056 | <1e-4 | slr8044  | G0:0043412 | <1e-4 | slr0545  | G0:0043170 | <1e-4 | sl110448 | G0:0022891 | <1e-4 | sl111025 | G0:0016787 | 0.1203 |
| slr0619  | G0:0044106 | <1e-4 | sl110802 | G0:0051179 | <1e-4 | sl110780 | G0:0001932 | <1e-4 | sl117065 | G0:0022891 | <1e-4 | sl110860 | G0:0016787 | 0.1203 |
| slr0392  | G0:0050794 | <1e-4 | ssl7022  | G0:0050794 | <1e-4 | slr0876  | G0:0009165 | <1e-4 | sl111186 | G0:0015399 | <1e-4 | sl110775 | G0:0016787 | 0.1203 |
| slr0888  | G0:0009259 | <1e-4 | slr1315  | G0:0006732 | <1e-4 | slr1033  | G0:0048523 | <1e-4 | slr1196  | G0:0043492 | <1e-4 | slr7025  | G0:0016787 | 0.1203 |
| sl11232  | G0:0072521 | <1e-4 | slr0887  | G0:0010556 | <1e-4 | sl111722 | G0:0009394 | <1e-4 | sl111455 | G0:0022890 | <1e-4 | slr0960  | G0:0016787 | 0.1203 |
| slr0262  | G0:0008150 | <1e-4 | sl110156 | G0:0006733 | <1e-4 | slr0058  | G0:0009260 | <1e-4 | sl110007 | G0:0015267 | <1e-4 | slr0092  | G0:0016787 | 0.1203 |
| slr5037  | G0:0031323 | <1e-4 | slr1235  | G0:0006732 | <1e-4 | slr1062  | G0:0009165 | <1e-4 | slr6014  | G0:0060089 | <1e-4 | sl110174 | G0:0016787 | 0.1203 |
| ssr1407  | G0:0009308 | <1e-4 | sl115033 | G0:0009141 | <1e-4 | sl111979 | G0:0019752 | <1e-4 | sl110498 | G0:0022891 | <1e-4 | ssr2317  | G0:0016787 | 0.1203 |
| slr0516  | G0:0042451 | <1e-4 | sl110412 | G0:0042455 | <1e-4 | ss10350  | G0:0006082 | <1e-4 | slr0209  | G0:0015291 | <1e-4 | sl110423 | G0:0016787 | 0.1203 |
| ssr6024  | G0:0009199 | <1e-4 | sl110444 | G0:0044282 | <1e-4 | ssr3410  | G0:0010468 | <1e-4 | slr7024  | G0:0015405 | <1e-4 | slr0362  | G0:0016787 | 0.1203 |
| sl11151  | G0:0009987 | <1e-4 | ssl3291  | G0:0048523 | <1e-4 | slr0356  | G0:0046164 | <1e-4 | slr1069  | G0:0015291 | <1e-4 | slr6014  | G0:0016787 | 0.1203 |
| sl110241 | G0:0006766 | <1e-4 | slr0303  | G0:0034654 | <1e-4 | slr2003  | G0:0006576 | <1e-4 | sl110518 | G0:0003674 | <1e-4 | sl110518 | G0:0016787 | 0.1203 |
| ssr2962  | G0:0044106 | <1e-4 | slr1419  | G0:0006576 | <1e-4 | slr0964  | G0:0006811 | <1e-4 | slr1571  | G0:0016462 | <1e-4 | slr0065  | G0:0016787 | 0.1203 |
| sl110888 | G0:0016052 | <1e-4 | slr0496  | G0:0051171 | <1e-4 | sl110319 | G0:0006631 | <1e-4 | slr0771  | G0:0060089 | <1e-4 | slr1273  | G0:0016787 | 0.1203 |
| slr0362  | G0:0019752 | <1e-4 | sl110810 | G0:0044275 | <1e-4 | sl111135 | G0:0065007 | <1e-4 | sl110023 | G0:0015077 | <1e-4 | sg10001  | G0:0016787 | 0.1203 |
| sl110984 | G0:0031323 | <1e-4 | slr0769  | G0:0006732 | <1e-4 | ssr2615  | G0:0034641 | <1e-4 | slr1603  | G0:0022890 | <1e-4 | sl111773 | G0:0016787 | 0.1203 |
| slr1218  | G0:0009892 | <1e-4 | slr2103  | G0:0009893 | <1e-4 | sl110585 | G0:0046483 | <1e-4 | slr2025  | G0:0022890 | <1e-4 | slr6031  | G0:0016787 | 0.1203 |
| sl110406 | G0:0009991 | <1e-4 | slr6075  | G0:0008150 | <1e-4 | ss11255  | G0:0018130 | <1e-4 | sl110763 | G0:0022803 | <1e-4 | sl15062  | G0:0016787 | 0.1203 |
| slr1107  | G0:0031640 | <1e-4 | sl111611 | G0:0009991 | <1e-4 | ss10410  | G0:0006811 | <1e-4 | slr1866  | G0:0042623 | <1e-4 | slr0870  | G0:0016787 | 0.1203 |
| ssr6003  | G0:0044271 | <1e-4 | slr0147  | G0:0019219 | <1e-4 | sl111049 | G0:0055086 | <1e-4 | slr1541  | G0:0022832 | <1e-4 | slr0168  | G0:0016787 | 0.1203 |
| sl11247  | G0:0009259 | <1e-4 | slr1178  | G0:0008150 | <1e-4 | slr1799  | G0:0050801 | <1e-4 | slr0579  | G0:0022892 | <1e-4 | slr1576  | G0:0016787 | 0.1203 |
| slr1095  | G0:0009394 | <1e-4 | slr7015  | G0:0019751 | <1e-4 | sl115046 | G0:0071554 | <1e-4 | slr2101  | G0:0022832 | <1e-4 | slr1207  | G0:0016787 | 0.1203 |
| slr1862  | G0:0044248 | <1e-4 | sl110296 | G0:0006811 | <1e-4 | slr1819  | G0:0043436 | <1e-4 | slr0509  | G0:0016462 | <1e-4 | sl11866  | G0:0016787 | 0.1203 |
| slr0082  | G0:0051716 | <1e-4 | sl110448 | G0:0006732 | <1e-4 | slr0006  | G0:0065007 | <1e-4 | ssr5117  | G0:0022832 | <1e-4 | slr1958  | G0:0016787 | 0.1203 |
| sl110068 | G0:0006766 | <1e-4 | ssr5074  | G0:0043549 | <1e-4 | slr6007  | G0:0009260 | <1e-4 | slr7095  | G0:0015267 | <1e-4 | ssr2422  | G0:0016787 | 0.1203 |
| sl110740 | G0:0016052 | <1e-4 | sl11960  | G0:0044281 | <1e-4 | slr2120  | G0:0044003 | <1e-4 | sl111158 | G0:0005342 | <1e-4 | slr0619  | G0:0016787 | 0.1203 |
| sl11835  | G0:0048523 | <1e-4 | sl110482 | G0:0009165 | <1e-4 | sl111880 | G0:0033013 | <1e-4 | ssr1558  | G0:0015075 | <1e-4 | sl15006  | G0:0016787 | 0.1203 |
| sl110198 | G0:0043933 | <1e-4 | sl111304 | G0:0001932 | <1e-4 | slr1935  | G0:0052188 | <1e-4 | ssr2201  | G0:0015075 | <1e-4 | slr7096  | G0:0016787 | 0.1203 |
| slr1163  | G0:0071496 | <1e-4 | slr0505  | G0:0009161 | <1e-4 | slr1419  | G0:0043549 | <1e-4 | slr1203  | G0:0015293 | <1e-4 | ss12245  | G0:0016787 | 0.1203 |
| sl110350 | G0:0051171 | <1e-4 | slr5021  | G0:0009987 | <1e-4 | slr1450  | G0:0050801 | <1e-4 | slr1170  | G0:0016462 | <1e-4 | slr2010  | G0:0016787 | 0.1203 |
| sl115090 | G0:0051246 | <1e-4 | slr6090  | G0:0050896 | <1e-4 | slr6103  | G0:0042451 | <1e-4 | ssr6085  | G0:0015267 | <1e-4 | slr0569  | G0:0016787 | 0.1203 |
| sl11714  | G0:0009141 | <1e-4 | slr1083  | G0:0006811 | <1e-4 | ssr2611  | G0:0006732 | <1e-4 | sl110614 | G0:0022892 | <1e-4 | ssr5120  | G0:0016787 | 0.1203 |
| slr0053  | G0:0043436 | <1e-4 | sl11956  | G0:0033013 | <1e-4 | slr1449  | G0:0006811 | <1e-4 | slr0423  | G0:0015077 | <1e-4 | sg10002  | G0:0016787 | 0.1203 |
| slr5118  | G0:0052111 | <1e-4 | slr1593  | G0:0048878 | <1e-4 | slr0313  | G0:0016054 | <1e-4 | sl110382 | G0:0015291 | <1e-4 | sl11378  | G0:0016787 | 0.1203 |
| sl11272  | G0:0042180 | <1e-4 | slr1273  | G0:0080090 | <1e-4 | slr0065  | G0:0072527 | <1e-4 | sl111151 | G0:0015075 | <1e-4 | ss10312  | G0:0016787 | 0.1203 |
| slr1263  | G0:0065007 | <1e-4 | slr2125  | G0:0006220 | <1e-4 | slr0519  | G0:0065007 | <1e-4 | slr1827  | G0:0016746 | <1e-4 | slr0598  | G0:0016787 | 0.1203 |
| sl110752 | G0:0042180 | <1e-4 | slr0712  | G0:0051246 | <1e-4 | sl110456 | G0:0006732 | <1e-4 | slr1162  | G0:0022891 | <1e-4 | ss12717  | G0:0016787 | 0.1203 |
| slr1866  | G0:0006091 | <1e-4 | sl111254 | G0:0006721 | <1e-4 | slr0751  | G0:0008150 | <1e-4 | slr0145  | G0:0060089 | <1e-4 | sl11355  | G0:0016787 | 0.1203 |
| sl115047 | G0:0071840 | <1e-4 | sl110863 | G0:0009394 | <1e-4 | slr0771  | G0:0009056 | <1e-4 | slr1122  | G0:0022838 | <1e-4 | ss12420  | G0:0016787 | 0.1203 |
| slr1474  | G0:0009057 | <1e-4 | sl110997 | G0:0072527 | <1e-4 | slr1338  | G0:0046164 | <1e-4 | sl110309 | G0:0022857 | <1e-4 | slr0146  | G0:0016787 | 0.1203 |
| ssr2962  | G0:0009123 | <1e-4 | sl11218  | G0:0006793 | <1e-4 | slr0729  | G0:0022411 | <1e-4 | slr1812  | G0:0016462 | <1e-4 | slr1315  | G0:0016787 | 0.1203 |
| sl110428 | G0:0009056 | <1e-4 | slr1773  | G0:0046394 | <1e-4 | slr1519  | G0:0071841 | <1e-4 | slr0109  | G0:0016741 | <1e-4 | slr0784  | G0:0016787 | 0.1203 |
| sl11380  | G0:0044260 | <1e-4 | sl111254 | G0:0019751 | <1e-4 | sl111254 | G0:0016054 | <1e-4 | ssr6020  | G0:0043492 | <1e-4 | ss11498  | G0:0016787 | 0.1203 |
| sl111158 | G0:0009165 | <1e-4 | sl110062 | G0:0044271 | <1e-4 | sl111155 | G0:0046394 | <1e-4 | slr7092  | G0:0043167 | <1e-4 | ssr6048  | G0:0016787 | 0.1203 |
| sl11880  | G0:0071840 | <1e-4 | slr0654  | G0:0031326 | <1e-4 | ssr6099  | G0:0043412 | <1e-4 | ssr2422  | G0:0060089 | <1e-4 | sl110168 | G0:0016787 | 0.1203 |
| sl110875 | G0:0009263 | <1e-4 | slr1189  | G0:0016054 | <1e-4 | slr1865  | G0:0009144 | <1e-4 | slr0670  | G0:0060089 | <1e-4 | slr7101  | G0:0016787 | 0.1203 |
| slr6094  | G0:0080090 | <1e-4 | slr0871  | G0:0051171 | <1e-4 | slr0606  | G0:0009263 | <1e-4 | ss13451  | G0:0015405 | <1e-4 | slr0333  | G0:0016787 | 0.1203 |
| sl11738  | G0:0010468 | <1e-4 | slr1911  | G0:0051171 | <1e-4 | sl111132 | G0:0044255 | <1e-4 | slr1644  | G0:0004872 | <1e-4 | slr1957  | G0:0016787 | 0.1203 |
| sl11835  | G0:0006720 | <1e-4 | slr7026  | G0:0072528 | <1e-4 | slr0300  | G0:0009123 | <1e-4 | sl111061 | G0:0022832 | <1e-4 | slr1168  | G0:0016787 | 0.1203 |
| slr5037  | G0:0044260 | <1e-4 | sl110763 | G0:0071842 | <1e-4 | sl110552 | G0:0009889 | <1e-4 | slr0305  | G0:0005342 | <1e-4 | sl110853 | G0:0016787 | 0.1203 |

ssl3692 GO:0051171 <1e-4 sll1319 GO:0051186 <1e-4 slr1210 GO:0006766 <1e-4 slr1847 GO:0042623 <1e-4 slr6039 GO:0016787 0.1203  
slr1143 GO:0060255 <1e-4 sm10011 GO:0044282 <1e-4 sss3189 GO:0031640 <1e-4 sss3300 GO:0005342 <1e-4 sll10478 GO:0016787 0.1203  
slr1813 GO:0044106 <1e-4 slr0273 GO:0019222 <1e-4 sll1068 GO:0045184 <1e-4 sll10803 GO:0022890 <1e-4 slr0489 GO:0016787 0.1203  
slr5037 GO:0009117 <1e-4 slr5116 GO:0009117 <1e-4 slr0476 GO:0009059 <1e-4 sll10354 GO:0015293 <1e-4 slr7083 GO:0016787 0.1203  
slr0610 GO:0034654 <1e-4 sll1401 GO:0072528 <1e-4 slr8021 GO:0046907 <1e-4 sll1552 GO:0015291 <1e-4 sll15130 GO:0016787 0.1203  
sll10736 GO:0033013 <1e-4 sll1174 GO:0031640 <1e-4 sll0410 GO:0044248 <1e-4 slr5112 GO:0043167 <1e-4 slr7081 GO:0016787 0.1203  
slr1419 GO:0009262 <1e-4 sll10157 GO:0044275 <1e-4 slr0304 GO:0045184 <1e-4 sll0461 GO:0015075 <1e-4 slr1218 GO:0016787 0.1203  
slr0157 GO:0009262 <1e-4 slr1081 GO:0042180 <1e-4 sss6027 GO:0090304 <1e-4 slr1865 GO:0043167 <1e-4 sll1960 GO:0016787 0.1203  
slr0806 GO:0055086 <1e-4 slr0852 GO:0009150 <1e-4 slr1045 GO:0009150 <1e-4 sll2006 GO:0015075 <1e-4 sss0332 GO:0016787 0.1203  
slr7091 GO:0010556 <1e-4 slr6103 GO:0080090 <1e-4 sll1352 GO:0022411 <1e-4 slr2084 GO:0015267 <1e-4 sll10369 GO:0016787 0.1203  
ssl5015 GO:0051818 <1e-4 sll3451 GO:0009263 <1e-4 slr0885 GO:0001932 <1e-4 sll10147 GO:0003674 <1e-4 sll11163 GO:0016787 0.1203  
slr1603 GO:0022411 <1e-4 sll1396 GO:0034641 <1e-4 sll10552 GO:0006082 <1e-4 sll1401 GO:0043167 <1e-4 slr6063 GO:0016787 0.1203  
sll10572 GO:0009308 <1e-4 slr1815 GO:0048522 <1e-4 slr1699 GO:0044275 <1e-4 slr1547 GO:0043167 <1e-4 sss7036 GO:0016787 0.1203  
sll1542 GO:0019222 <1e-4 slr1911 GO:0018130 <1e-4 slr1623 GO:0043412 <1e-4 slr6090 GO:0022838 <1e-4 slr7012 GO:0016787 0.1203  
slr1819 GO:0051716 <1e-4 slr1210 GO:0006720 <1e-4 sll10857 GO:0009309 <1e-4 slr1083 GO:0016746 <1e-4 sll10282 GO:0016787 0.1203  
sll1381 GO:0051188 <1e-4 slr1915 GO:0009117 <1e-4 slr0596 GO:0008150 <1e-4 slr1773 GO:0022836 <1e-4 slr0355 GO:0016787 0.1203  
ssl0467 GO:0005996 <1e-4 sll1765 GO:0009059 <1e-4 sss2551 GO:0009142 <1e-4 slr1407 GO:0015075 <1e-4 slr0058 GO:0016787 0.1203  
slr8022 GO:0009117 <1e-4 slr0821 GO:0046164 <1e-4 slr0304 GO:0006733 <1e-4 sll10606 GO:0016746 <1e-4 sll11217 GO:0016787 0.1203  
slr6021 GO:0009892 <1e-4 slr1601 GO:0018130 <1e-4 slr1780 GO:0006220 <1e-4 sll10641 GO:0016818 <1e-4 slr1814 GO:0016787 0.1203  
sll10996 GO:0051347 <1e-4 slr1726 GO:0072521 <1e-4 sll11764 GO:0055086 <1e-4 sll10321 GO:0015267 <1e-4 slr0890 GO:0016787 0.1203  
slr0670 GO:0051347 <1e-4 slr0876 GO:0033013 <1e-4 slr1365 GO:0048523 <1e-4 slr6029 GO:0016817 <1e-4 sll11203 GO:0016787 0.1203  
sll1960 GO:0048518 <1e-4 sll1239 GO:0009165 <1e-4 slr1702 GO:0044271 <1e-4 slr0498 GO:0022857 <1e-4 sll10498 GO:0016787 0.1203  
slr0374 GO:0043436 <1e-4 slr0082 GO:0034654 <1e-4 slr0712 GO:0044255 <1e-4 sss6003 GO:0022892 <1e-4 sll10761 GO:0016787 0.1203  
slr2105 GO:0044282 <1e-4 slr0334 GO:0009124 <1e-4 slr1932 GO:0033013 <1e-4 sll1995 GO:0015399 <1e-4 slr7016 GO:0016787 0.1203  
sll1925 GO:0048518 <1e-4 slr6047 GO:0008150 <1e-4 sll10611 GO:0018130 <1e-4 sll1960 GO:0015399 <1e-4 sll11155 GO:0016787 0.1203  
sll10609 GO:0006733 <1e-4 sll1252 GO:0008610 <1e-4 slr0393 GO:0005996 <1e-4 slr1206 GO:0015291 <1e-4 sll17063 GO:0016787 0.1203  
sll10359 GO:0051818 <1e-4 sss5011 GO:0043933 <1e-4 slr2025 GO:0048878 <1e-4 sll1658 GO:0022838 <1e-4 slr1535 GO:0016787 0.1203  
slr1811 GO:0006220 <1e-4 sss10738 GO:0009987 <1e-4 sll10737 GO:0016052 <1e-4 sll10069 GO:0022857 <1e-4 sll3451 GO:0016787 0.1203  
sss8047 GO:0009987 <1e-4 sss1258 GO:0051347 <1e-4 sll1498 GO:0031326 <1e-4 slr0742 GO:0015267 <1e-4 sll11606 GO:0016787 0.1203  
ssl7022 GO:0010556 <1e-4 sll1352 GO:0046394 <1e-4 slr0269 GO:0051246 <1e-4 sll1021 GO:0022803 <1e-4 slr1276 GO:0016787 0.1203  
sll1109 GO:0016052 <1e-4 sss15100 GO:0006733 <1e-4 sss7079 GO:0009161 <1e-4 slr7096 GO:0015399 <1e-4 slr1534 GO:0016787 0.1203  
sll1036 GO:0006811 <1e-4 slr1670 GO:0019637 <1e-4 slr0082 GO:0043933 <1e-4 sll11162 GO:0042623 <1e-4 sll11765 GO:0016787 0.1203  
sll10508 GO:0034654 <1e-4 sss13382 GO:0016054 <1e-4 sll10482 GO:0006220 <1e-4 sll10752 GO:0015267 <1e-4 sss0335 GO:0016787 0.1203  
slr6047 GO:0034641 <1e-4 sll1319 GO:0072527 <1e-4 slr1851 GO:0019751 <1e-4 slr1568 GO:0022890 <1e-4 sss15129 GO:0016787 0.1203  
slr0870 GO:0042180 <1e-4 sss15008 GO:0043436 <1e-4 slr2004 GO:0006721 <1e-4 sll10558 GO:0015291 <1e-4 slr0049 GO:0016787 0.1203  
slr0740 GO:0050801 <1e-4 slr5112 GO:0006766 <1e-4 sll10456 GO:0046164 <1e-4 slr1363 GO:0015267 <1e-4 sss11923 GO:0016787 0.1203  
slr1657 GO:0009123 <1e-4 sll1853 GO:0043170 <1e-4 sll10659 GO:0009889 <1e-4 slr0579 GO:0022832 <1e-4 sll15047 GO:0016787 0.1203  
sll10608 GO:0009117 <1e-4 slr0586 GO:0071554 <1e-4 sll11381 GO:0005996 <1e-4 slr0498 GO:0016462 <1e-4 slr0552 GO:0016787 0.1203  
slr1203 GO:0009987 <1e-4 sll11880 GO:0071842 <1e-4 slr0872 GO:0046483 <1e-4 slr0453 GO:0015399 <1e-4 sll10762 GO:0016787 0.1203  
slr1658 GO:0008150 <1e-4 slr1913 GO:0046907 <1e-4 sll17070 GO:0008150 <1e-4 slr0249 GO:0022836 <1e-4 slr7023 GO:0016787 0.1203  
sll11036 GO:0009161 <1e-4 sss10738 GO:0034654 <1e-4 sll10198 GO:0080090 <1e-4 sll17064 GO:0022838 <1e-4 sll11880 GO:0016787 0.1203  
sll1832 GO:0052111 <1e-4 sll15069 GO:0009165 <1e-4 slr6033 GO:0055082 <1e-4 slr0273 GO:0022803 <1e-4 sll10293 GO:0016787 0.1203  
sll10837 GO:0045184 <1e-4 slr0989 GO:0050896 <1e-4 sll11388 GO:0006163 <1e-4 slr0440 GO:0043492 <1e-4 slr11102 GO:0016787 0.1203  
sll10676 GO:0001932 <1e-4 slr1507 GO:0031640 <1e-4 slr6104 GO:0044248 <1e-4 sss6046 GO:0042623 <1e-4 sll11921 GO:0016787 0.1203  
sll1926 GO:0005996 <1e-4 slr1648 GO:0001932 <1e-4 sll11164 GO:0048878 <1e-4 slr1628 GO:0016741 <1e-4 sll10473 GO:0016787 0.1203  
slr1194 GO:0072522 <1e-4 sll10837 GO:0019751 <1e-4 slr0581 GO:0009199 <1e-4 sll11769 GO:0016462 <1e-4 slr6006 GO:0016787 0.1203  
slr6044 GO:0006753 <1e-4 slr6021 GO:0009260 <1e-4 slr2000 GO:0050896 <1e-4 slr1339 GO:0015291 <1e-4 slr1660 GO:0016787 0.1203  
slr0729 GO:0031640 <1e-4 sll15069 GO:0044271 <1e-4 sll11785 GO:0009132 <1e-4 sss3570 GO:0016746 <1e-4 sll11162 GO:0016787 0.1203  
slr0217 GO:0009059 <1e-4 slr1301 GO:0019222 <1e-4 slr0049 GO:0006793 <1e-4 slr0503 GO:0016462 <1e-4 slr1195 GO:0016787 0.1203  
slr0498 GO:0034641 <1e-4 sll11348 GO:0048519 <1e-4 slr1659 GO:0046128 <1e-4 slr7026 GO:0022891 <1e-4 slr1568 GO:0016787 0.1203  
sll10242 GO:0009144 <1e-4 sss8047 GO:0048523 <1e-4 slr1378 GO:0051347 <1e-4 slr1025 GO:0043167 <1e-4 sss17046 GO:0016787 0.1203  
sll10281 GO:0022607 <1e-4 sss2317 GO:0071840 <1e-4 slr0509 GO:0044260 <1e-4 sll11873 GO:0022803 <1e-4 slr6072 GO:0016787 0.1203  
slr0552 GO:0072522 <1e-4 sll10482 GO:0006091 <1e-4 slr0607 GO:0043170 <1e-4 sll11834 GO:0015405 <1e-4 slr1365 GO:0016787 0.1203  
slr0398 GO:0009394 <1e-4 slr1413 GO:0009144 <1e-4 slr2012 GO:0019637 <1e-4 slr6005 GO:0015077 <1e-4 sll11696 GO:0016787 0.1203

ssr1558 G0:0009059 <1e-4 s110098 G0:0006721 <1e-4 s111285 G0:0006066 <1e-4 slr0725 G0:0022890 <1e-4 slr2118 G0:0016787 0.1203  
slr1462 G0:0010556 <1e-4 slr1069 G0:0055114 <1e-4 s115109 G0:0071840 <1e-4 ss18028 G0:0015291 <1e-4 s110553 G0:0016787 0.1203  
ssr3189 G0:0009394 <1e-4 ssr2551 G0:0010468 <1e-4 slr0930 G0:0009126 <1e-4 s110811 G0:0016817 <1e-4 slr1721 G0:0016787 0.1203  
s111757 G0:0055082 <1e-4 s110218 G0:0001932 <1e-4 s111702 G0:0006091 <1e-4 ss10483 G0:0022857 <1e-4 slr2032 G0:0016787 0.1203  
slr0442 G0:0034660 <1e-4 slr0651 G0:0006220 <1e-4 ssr6062 G0:0018130 <1e-4 slr1053 G0:0016741 <1e-4 slr0196 G0:0016787 0.1203  
s111532 G0:0051716 <1e-4 slr0692 G0:0008150 <1e-4 slr1599 G0:0006733 <1e-4 slr2003 G0:0022857 <1e-4 s110218 G0:0016787 0.1203  
s111542 G0:0042451 <1e-4 s117022 G0:0005996 <1e-4 slr0082 G0:0006732 <1e-4 slr0249 G0:0043167 <1e-4 slr0695 G0:0016787 0.1203  
ssr6086 G0:0019752 <1e-4 slr0723 G0:0050801 <1e-4 slr0876 G0:0044106 <1e-4 s111696 G0:0015077 <1e-4 s111853 G0:0016787 0.1203  
ssr2802 G0:0050801 <1e-4 slr0581 G0:0019751 <1e-4 s110623 G0:0043648 <1e-4 ss12245 G0:0022857 <1e-4 s110863 G0:0016787 0.1203  
slr1187 G0:0048878 <1e-4 ss15091 G0:0006631 <1e-4 slr0907 G0:0006721 <1e-4 slr1114 G0:0008171 <1e-4 slr7015 G0:0016787 0.1203  
slr0145 G0:0051347 <1e-4 slr0596 G0:0060255 <1e-4 s111495 G0:0071842 <1e-4 slr1935 G0:0022803 <1e-4 ss15065 G0:0016787 0.1203  
s111656 G0:0019219 <1e-4 slr1161 G0:0034641 <1e-4 slr1636 G0:0072522 <1e-4 ssr6027 G0:0022892 <1e-4 slr6015 G0:0016787 0.1203  
ssr2962 G0:0071840 <1e-4 slr0913 G0:0006091 <1e-4 slr0397 G0:0010556 <1e-4 slr1218 G0:0022832 <1e-4 s111348 G0:0016787 0.1203  
slr1814 G0:0022411 <1e-4 s110066 G0:0071496 <1e-4 slr1886 G0:0034654 <1e-4 slr0148 G0:0022890 <1e-4 s111252 G0:0016787 0.1203  
slr6106 G0:0009124 <1e-4 s110443 G0:0008610 <1e-4 slr7013 G0:0051179 <1e-4 s110272 G0:0015077 <1e-4 s118007 G0:0016787 0.1203  
ss12807 G0:0044255 <1e-4 s110168 G0:0009262 <1e-4 slr2027 G0:0090304 <1e-4 ss15015 G0:0022832 <1e-4 s110930 G0:0016787 0.1203  
slr0404 G0:0050801 <1e-4 ss17042 G0:0071840 <1e-4 ssr5092 G0:0046164 <1e-4 s111289 G0:0015291 <1e-4 s115032 G0:0016787 0.1203  
slr0728 G0:0009144 <1e-4 ss13829 G0:0044275 <1e-4 ss15091 G0:0009987 <1e-4 s111586 G0:0022838 <1e-4 slr1677 G0:0016787 0.1203  
s110283 G0:0052188 <1e-4 ss13383 G0:0019362 <1e-4 slr1681 G0:0050801 <1e-4 slr0362 G0:0015075 <1e-4 s110102 G0:0016787 0.1203  
ssr3571 G0:0006793 <1e-4 slr1557 G0:0072528 <1e-4 slr7013 G0:0006733 <1e-4 slr0345 G0:0016746 <1e-4 s118002 G0:0016787 0.1203  
slr7094 G0:0042180 <1e-4 s110301 G0:0009309 <1e-4 slr7059 G0:0072521 <1e-4 s110382 G0:0015075 <1e-4 slr1484 G0:0016787 0.1203  
slr0607 G0:0071842 <1e-4 ss12971 G0:0051246 <1e-4 ssr5120 G0:0072522 <1e-4 ssr6079 G0:0022836 <1e-4 slr6073 G0:0016787 0.1203  
slr0192 G0:0009141 <1e-4 slr1290 G0:0051818 <1e-4 slr0250 G0:0055114 <1e-4 slr1260 G0:0060089 <1e-4 s110443 G0:0016787 0.1203  
s111239 G0:0019219 <1e-4 slr0919 G0:0050896 <1e-4 slr0642 G0:0019752 <1e-4 s111652 G0:0015291 <1e-4 s115033 G0:0016787 0.1203  
ssr0102 G0:0009117 <1e-4 ss11498 G0:0009889 <1e-4 s110843 G0:0006082 <1e-4 slr1102 G0:0022836 <1e-4 ss15045 G0:0016787 0.1203  
slr1338 G0:0009987 <1e-4 slr7098 G0:0009161 <1e-4 slr0204 G0:0043436 <1e-4 ss11972 G0:0015291 <1e-4 s111092 G0:0016787 0.1203  
ssr2439 G0:0018130 <1e-4 s111002 G0:0019219 <1e-4 ss12807 G0:0006811 <1e-4 slr0023 G0:0022838 <1e-4 slr0751 G0:0016787 0.1203  
s118019 G0:0009124 <1e-4 slr0263 G0:0031640 <1e-4 slr7094 G0:0051716 <1e-4 s110147 G0:0015293 <1e-4 slr1914 G0:0016787 0.1203  
s110611 G0:0009141 <1e-4 s111726 G0:0048523 <1e-4 slr1998 G0:0009893 <1e-4 s110066 G0:0016462 <1e-4 s110846 G0:0016787 0.1203  
s110162 G0:0009132 <1e-4 slr1288 G0:0006721 <1e-4 slr6091 G0:0051234 <1e-4 slr1073 G0:0022891 <1e-4 s110008 G0:0016787 0.1203  
s110488 G0:0033013 <1e-4 slr0869 G0:0009199 <1e-4 slr0503 G0:0071841 <1e-4 s110249 G0:0022838 <1e-4 slr2101 G0:0016787 0.1203  
slr1660 G0:0009889 <1e-4 s111563 G0:0009126 <1e-4 slr1576 G0:0043549 <1e-4 s1117078 G0:0022832 <1e-4 s1117064 G0:0016787 0.1203  
ss15027 G0:0046164 <1e-4 slr0204 G0:0042451 <1e-4 s110442 G0:0009987 <1e-4 slr1376 G0:0015077 <1e-4 slr0912 G0:0016787 0.1203  
s111193 G0:0008150 <1e-4 s110623 G0:0009260 <1e-4 s111738 G0:0010556 <1e-4 slr0592 G0:0022857 <1e-4 slr1547 G0:0016787 0.1203  
s111040 G0:0009123 <1e-4 slr0303 G0:0008610 <1e-4 slr0151 G0:0031323 <1e-4 s110608 G0:0022892 <1e-4 s1111004 G0:0016787 0.1203  
slr2121 G0:0010556 <1e-4 s111307 G0:0046164 <1e-4 slr2125 G0:0048518 <1e-4 slr2073 G0:0005342 <1e-4 slr0199 G0:0016787 0.1203  
slr1431 G0:0044283 <1e-4 ss13383 G0:0051171 <1e-4 ss12749 G0:0060255 <1e-4 slr0341 G0:0015291 <1e-4 slr1472 G0:0016787 0.1203  
s111542 G0:0046128 <1e-4 s110596 G0:0080090 <1e-4 s110761 G0:0009308 <1e-4 slr0388 G0:0015077 <1e-4 ssr5117 G0:0016787 0.1203  
slr6065 G0:0044248 <1e-4 s111158 G0:0050896 <1e-4 ss17039 G0:0009892 <1e-4 s110847 G0:0022857 <1e-4 s112015 G0:0016787 0.1203  
slr6100 G0:0006766 <1e-4 ssr2975 G0:0071841 <1e-4 s110658 G0:0033013 <1e-4 slr0869 G0:0022838 <1e-4 slr1095 G0:0016787 0.1203  
s111373 G0:0071842 <1e-4 slr1241 G0:0009141 <1e-4 s110864 G0:0044248 <1e-4 slr1565 G0:0015075 <1e-4 slr1927 G0:0016787 0.1203  
slr0392 G0:0048522 <1e-4 ssr2802 G0:0072524 <1e-4 s110793 G0:0044260 <1e-4 s1117006 G0:0016817 <1e-4 s110063 G0:0016787 0.1203  
s110242 G0:0019752 <1e-4 s110188 G0:0006091 <1e-4 slr1301 G0:0006631 <1e-4 ssr2615 G0:0015399 <1e-4 ssr3410 G0:0016787 0.1203  
slr1530 G0:0006576 <1e-4 slr0806 G0:0050794 <1e-4 slr0545 G0:0045184 <1e-4 s110781 G0:0022892 <1e-4 slr1470 G0:0016787 0.1203  
s110658 G0:0009123 <1e-4 slr0392 G0:0051186 <1e-4 slr0872 G0:0019222 <1e-4 s111858 G0:0015267 <1e-4 s1117047 G0:0016787 0.1203  
ss11464 G0:0006753 <1e-4 ss12069 G0:0046394 <1e-4 slr0613 G0:0044255 <1e-4 slr1069 G0:0022891 <1e-4 ss18003 G0:0016787 0.1203  
s110218 G0:0006811 <1e-4 ssr3570 G0:0009059 <1e-4 slr1261 G0:0046483 <1e-4 slr0890 G0:0015399 <1e-4 slr1069 G0:0016787 0.1203  
slr6045 G0:0071841 <1e-4 s110710 G0:0009394 <1e-4 s1111573 G0:0033013 <1e-4 s111306 G0:0005342 <1e-4 slr6065 G0:0016787 0.1203  
slr6039 G0:0019222 <1e-4 slr1365 G0:0051188 <1e-4 slr0742 G0:0051716 <1e-4 slr0108 G0:0016741 <1e-4 slr1261 G0:0016787 0.1203  
s110268 G0:0018130 <1e-4 ssr7084 G0:0051246 <1e-4 slr7098 G0:0044281 <1e-4 slr1907 G0:0015399 <1e-4 ssr6085 G0:0016787 0.1203  
ssr3532 G0:0006163 <1e-4 s1111769 G0:0009117 <1e-4 slr7094 G0:0034654 <1e-4 s110066 G0:0022836 <1e-4 s1118004 G0:0016787 0.1203  
slr1188 G0:0051188 <1e-4 slr0521 G0:0050801 <1e-4 slr0596 G0:0006721 <1e-4 slr0264 G0:0016462 <1e-4 s111638 G0:0016787 0.1203  
slr0668 G0:0042180 <1e-4 slr1290 G0:0006631 <1e-4 slr1657 G0:0006753 <1e-4 slr0271 G0:0016817 <1e-4 slr6013 G0:0016787 0.1203  
slr0157 G0:0051246 <1e-4 ssr2972 G0:0009199 <1e-4 slr0650 G0:0044106 <1e-4 ssr0332 G0:0015405 <1e-4 s110742 G0:0016787 0.1203

|         |            |       |         |            |       |         |            |       |         |            |       |         |            |        |
|---------|------------|-------|---------|------------|-------|---------|------------|-------|---------|------------|-------|---------|------------|--------|
| sl10847 | G0:0071554 | <1e-4 | slr2052 | G0:0042455 | <1e-4 | sl10294 | G0:0050801 | <1e-4 | sl10871 | G0:0015399 | <1e-4 | sl10397 | G0:0016787 | 0.1203 |
| slr0959 | G0:0051171 | <1e-4 | ssr1425 | G0:0009308 | <1e-4 | slr6073 | G0:0046128 | <1e-4 | slr1774 | G0:0015399 | <1e-4 | slr1097 | G0:0016787 | 0.1203 |
| sl10085 | G0:0006576 | <1e-4 | slr1025 | G0:0065007 | <1e-4 | sl15128 | G0:0048519 | <1e-4 | slr1262 | G0:0008171 | <1e-4 | slr1179 | G0:0016787 | 0.1203 |
| sl11251 | G0:0006720 | <1e-4 | sl10382 | G0:0016052 | <1e-4 | sl10498 | G0:0016053 | <1e-4 | sl11130 | G0:0016462 | <1e-4 | sl17066 | G0:0016787 | 0.1203 |
| sl18035 | G0:0044271 | <1e-4 | slr1977 | G0:0009262 | <1e-4 | sl11715 | G0:0051234 | <1e-4 | sl11071 | G0:0022803 | <1e-4 | slr7097 | G0:0016787 | 0.1203 |
| sl10565 | G0:0006066 | <1e-4 | ssl2920 | G0:0048523 | <1e-4 | slr2119 | G0:0009308 | <1e-4 | ssr1951 | G0:0005342 | <1e-4 | sl10658 | G0:0016787 | 0.1203 |
| sl10192 | G0:0042451 | <1e-4 | sl11563 | G0:0006220 | <1e-4 | sl10272 | G0:0031323 | <1e-4 | slr0588 | G0:0015075 | <1e-4 | slr1068 | G0:0016787 | 0.1203 |
| sl10443 | G0:0072521 | <1e-4 | slr1628 | G0:0009309 | <1e-4 | slr2012 | G0:0050801 | <1e-4 | slr0291 | G0:0008171 | <1e-4 | slr1956 | G0:0016787 | 0.1203 |
| sl11505 | G0:0048523 | <1e-4 | sl10487 | G0:0022411 | <1e-4 | slr0712 | G0:0006091 | <1e-4 | slr0111 | G0:0022892 | <1e-4 | sl11273 | G0:0016787 | 0.1203 |
| slr0964 | G0:0051186 | <1e-4 | slr6075 | G0:0016054 | <1e-4 | sl10085 | G0:0051246 | <1e-4 | sl15090 | G0:0015291 | <1e-4 | sl10597 | G0:0016787 | 0.1203 |
| sl16055 | G0:0006091 | <1e-4 | slr0589 | G0:0006733 | <1e-4 | slr1169 | G0:0009117 | <1e-4 | sl10656 | G0:0022832 | <1e-4 | slr0151 | G0:0016787 | 0.1203 |
| slr0333 | G0:0051347 | <1e-4 | slr0689 | G0:0044281 | <1e-4 | slr1394 | G0:0006793 | <1e-4 | slr1816 | G0:0015405 | <1e-4 | slr1223 | G0:0016787 | 0.1203 |
| ssr2711 | G0:0009263 | <1e-4 | slr1260 | G0:0016052 | <1e-4 | slr0144 | G0:0043436 | <1e-4 | slr1391 | G0:0016462 | <1e-4 | slr0581 | G0:0016787 | 0.1203 |
| slr0207 | G0:0072524 | <1e-4 | sl11504 | G0:0044248 | <1e-4 | sl11071 | G0:0009260 | <1e-4 | sl18019 | G0:0015267 | <1e-4 | ssr7072 | G0:0016787 | 0.1203 |
| sl10815 | G0:0072527 | <1e-4 | slr0890 | G0:0051818 | <1e-4 | sl11784 | G0:0044106 | <1e-4 | slr0482 | G0:0042623 | <1e-4 | slr1768 | G0:0016787 | 0.1203 |
| slr1240 | G0:0046164 | <1e-4 | sl11608 | G0:0034641 | <1e-4 | slr2048 | G0:0043170 | <1e-4 | sl10606 | G0:0003674 | <1e-4 | slr0356 | G0:0016787 | 0.1203 |
| ss10312 | G0:0009309 | <1e-4 | sl11251 | G0:0052111 | <1e-4 | slr0456 | G0:0016053 | <1e-4 | sl11563 | G0:0022838 | <1e-4 | sl11691 | G0:0016787 | 0.1203 |
| ssr2142 | G0:0010556 | <1e-4 | ssr6020 | G0:0006811 | <1e-4 | sl10505 | G0:0071496 | <1e-4 | slr6087 | G0:0016818 | <1e-4 | sl11306 | G0:0016787 | 0.1203 |
| sl10872 | G0:0016052 | <1e-4 | sl10602 | G0:0009987 | <1e-4 | sl10160 | G0:0044106 | <1e-4 | slr6091 | G0:0016462 | <1e-4 | sl12013 | G0:0016787 | 0.1203 |
| sl11926 | G0:0051171 | <1e-4 | slr0730 | G0:0044260 | <1e-4 | slr1628 | G0:0046394 | <1e-4 | sl10815 | G0:0022890 | <1e-4 | ssr3304 | G0:0016787 | 0.1203 |
| sl11372 | G0:0009199 | <1e-4 | sl11378 | G0:0009056 | <1e-4 | sl10702 | G0:0050896 | <1e-4 | sl10282 | G0:0022891 | <1e-4 | sl10609 | G0:0016787 | 0.1203 |
| slr1033 | G0:0051188 | <1e-4 | ssl2162 | G0:0055114 | <1e-4 | slr0404 | G0:0009132 | <1e-4 | sl11191 | G0:0022892 | <1e-4 | sl10586 | G0:0005215 | 0.1202 |
| sl10984 | G0:0055082 | <1e-4 | sl10702 | G0:0009889 | <1e-4 | slr0592 | G0:0044260 | <1e-4 | sl10436 | G0:0060089 | <1e-4 | slr0978 | G0:0005215 | 0.1202 |
| sl11131 | G0:0009165 | <1e-4 | slr1117 | G0:0009123 | <1e-4 | sl11163 | G0:0033013 | <1e-4 | ss12384 | G0:0016462 | <1e-4 | slr0594 | G0:0005215 | 0.1202 |
| slr1161 | G0:0018130 | <1e-4 | slr7011 | G0:0008610 | <1e-4 | sl12015 | G0:0031326 | <1e-4 | sl10740 | G0:0003674 | <1e-4 | ss10353 | G0:0005215 | 0.1202 |
| sl11461 | G0:0009144 | <1e-4 | ssl0242 | G0:0052111 | <1e-4 | slr0971 | G0:0044281 | <1e-4 | ss10739 | G0:0022836 | <1e-4 | slr0923 | G0:0005215 | 0.1202 |
| slr0655 | G0:0009893 | <1e-4 | ssr0657 | G0:0009893 | <1e-4 | slr1236 | G0:0071496 | <1e-4 | slr6104 | G0:0015075 | <1e-4 | sl10558 | G0:0005215 | 0.1202 |
| sl15130 | G0:0071840 | <1e-4 | slr1436 | G0:0009259 | <1e-4 | sl15109 | G0:0009309 | <1e-4 | ssr3304 | G0:0015405 | <1e-4 | slr0589 | G0:0005215 | 0.1202 |
| sl11068 | G0:0043436 | <1e-4 | sl10864 | G0:0009059 | <1e-4 | slr0872 | G0:0071554 | <1e-4 | ssr2049 | G0:0015267 | <1e-4 | slr1047 | G0:0005215 | 0.1202 |
| ss10352 | G0:0050794 | <1e-4 | ssr0692 | G0:0009991 | <1e-4 | ssr3409 | G0:0016054 | <1e-4 | slr0589 | G0:0016462 | <1e-4 | sl10822 | G0:0005215 | 0.1202 |
| ssr3129 | G0:0051186 | <1e-4 | slr0962 | G0:0009059 | <1e-4 | sl11834 | G0:0009057 | <1e-4 | slr6045 | G0:0016462 | <1e-4 | slr1098 | G0:0005215 | 0.1202 |
| sl10183 | G0:0018130 | <1e-4 | ssr2972 | G0:0071841 | <1e-4 | sl10623 | G0:0019222 | <1e-4 | slr1362 | G0:0016818 | <1e-4 | slr0609 | G0:0005215 | 0.1202 |
| ss17048 | G0:0034654 | <1e-4 | sl11306 | G0:0006082 | <1e-4 | sl10443 | G0:0072527 | <1e-4 | sl10588 | G0:0022832 | <1e-4 | sl10022 | G0:0005215 | 0.1202 |
| ssr1256 | G0:0046483 | <1e-4 | slr0151 | G0:0006732 | <1e-4 | slr1601 | G0:0034641 | <1e-4 | slr0318 | G0:0015075 | <1e-4 | sl10783 | G0:0005215 | 0.1202 |
| slr1519 | G0:0006721 | <1e-4 | slr1668 | G0:0009308 | <1e-4 | ss15114 | G0:0043648 | <1e-4 | slr0082 | G0:0015291 | <1e-4 | slr0740 | G0:0005215 | 0.1202 |
| slr0976 | G0:0006811 | <1e-4 | sl11511 | G0:0022607 | <1e-4 | sl11469 | G0:0009126 | <1e-4 | ss10467 | G0:0016741 | <1e-4 | sl11751 | G0:0005215 | 0.1202 |
| sl10446 | G0:0043170 | <1e-4 | sl17031 | G0:0044248 | <1e-4 | sl10843 | G0:0006091 | <1e-4 | ss15095 | G0:0005342 | <1e-4 | sl10505 | G0:0005215 | 0.1202 |
| sl10524 | G0:0072521 | <1e-4 | sl17050 | G0:0009889 | <1e-4 | slr7102 | G0:0009123 | <1e-4 | sl10564 | G0:0015293 | <1e-4 | ss11377 | G0:0005215 | 0.1202 |
| sl10456 | G0:0009260 | <1e-4 | sl11764 | G0:0019752 | <1e-4 | sl10925 | G0:0044283 | <1e-4 | slr1474 | G0:0042623 | <1e-4 | sl11858 | G0:0005215 | 0.1195 |
| sl11902 | G0:0006082 | <1e-4 | slr0325 | G0:0034641 | <1e-4 | sl18033 | G0:0019752 | <1e-4 | sl10446 | G0:0015399 | <1e-4 | sl11737 | G0:0005215 | 0.1195 |
| ss12595 | G0:0051347 | <1e-4 | slr0848 | G0:0051347 | <1e-4 | slr0651 | G0:0042180 | <1e-4 | ss10353 | G0:0022832 | <1e-4 | slr1702 | G0:0005215 | 0.1195 |
| sl11866 | G0:0044255 | <1e-4 | sl10524 | G0:0048523 | <1e-4 | ssr6020 | G0:0065007 | <1e-4 | ss12717 | G0:0015293 | <1e-4 | slr1603 | G0:0005215 | 0.1195 |
| slr6014 | G0:0009262 | <1e-4 | slr2071 | G0:0072524 | <1e-4 | slr1537 | G0:0019752 | <1e-4 | ssr2611 | G0:0005342 | <1e-4 | slr1385 | G0:0005215 | 0.1195 |
| ssr0336 | G0:0051188 | <1e-4 | slr1827 | G0:0006720 | <1e-4 | slr0397 | G0:0006163 | <1e-4 | sl11251 | G0:0043492 | <1e-4 | slr0586 | G0:0003676 | 0.117  |
| slr0913 | G0:0044260 | <1e-4 | sl10103 | G0:0055086 | <1e-4 | sl11186 | G0:0042451 | <1e-4 | slr1210 | G0:0022803 | <1e-4 | sl11006 | G0:0003676 | 0.117  |
| slr0058 | G0:0043436 | <1e-4 | sl11797 | G0:0009259 | <1e-4 | slr6067 | G0:0071496 | <1e-4 | slr2144 | G0:0043167 | <1e-4 | slr1230 | G0:0003676 | 0.117  |
| sl18019 | G0:0044282 | <1e-4 | sl11142 | G0:0009987 | <1e-4 | sl10688 | G0:0008150 | <1e-4 | sl11380 | G0:0015399 | <1e-4 | sl11002 | G0:0003676 | 0.117  |
| sl10547 | G0:0046128 | <1e-4 | slr1907 | G0:0055082 | <1e-4 | slr1505 | G0:0048878 | <1e-4 | slr0060 | G0:0015077 | <1e-4 | sl11835 | G0:0003676 | 0.117  |
| slr0458 | G0:0051186 | <1e-4 | slr1541 | G0:0043170 | <1e-4 | ss15091 | G0:0009260 | <1e-4 | slr1624 | G0:0005342 | <1e-4 | ssr2439 | G0:0003676 | 0.117  |
| sl10162 | G0:0009991 | <1e-4 | sl10676 | G0:0034660 | <1e-4 | slr6049 | G0:0052188 | <1e-4 | slr0195 | G0:0016462 | <1e-4 | slr1573 | G0:0003676 | 0.117  |
| ssr0536 | G0:0009165 | <1e-4 | sl10294 | G0:0043436 | <1e-4 | sl17078 | G0:0009262 | <1e-4 | slr1660 | G0:0022838 | <1e-4 | sl10456 | G0:0003676 | 0.117  |
| slr1827 | G0:0009150 | <1e-4 | sl11378 | G0:0051171 | <1e-4 | sl10198 | G0:0019219 | <1e-4 | sl11163 | G0:0015405 | <1e-4 | sl10314 | G0:0003676 | 0.117  |
| sl10647 | G0:0031323 | <1e-4 | slr0272 | G0:0022607 | <1e-4 | slr0619 | G0:0006793 | <1e-4 | ss10739 | G0:0015077 | <1e-4 | slr1073 | G0:0003676 | 0.117  |
| slr0458 | G0:0019637 | <1e-4 | sl11400 | G0:0009150 | <1e-4 | sl11240 | G0:0071840 | <1e-4 | sl10678 | G0:0022803 | <1e-4 | slr0404 | G0:0003676 | 0.117  |

|          |            |       |          |            |       |          |            |       |          |            |       |          |            |        |
|----------|------------|-------|----------|------------|-------|----------|------------|-------|----------|------------|-------|----------|------------|--------|
| sll1611  | G0:0009056 | <1e-4 | sll1164  | G0:0031640 | <1e-4 | ssr1375  | G0:0019637 | <1e-4 | sll0658  | G0:0043167 | <1e-4 | slr0872  | G0:0003676 | 0.117  |
| slr1258  | G0:0044282 | <1e-4 | sll1608  | G0:0050794 | <1e-4 | sll1433  | G0:0019222 | <1e-4 | sll0419  | G0:0022857 | <1e-4 | sll0785  | G0:0003676 | 0.117  |
| slr0232  | G0:0080090 | <1e-4 | slr5023  | G0:0044282 | <1e-4 | slr0514  | G0:0051246 | <1e-4 | sll1658  | G0:0016817 | <1e-4 | slr0023  | G0:0003676 | 0.117  |
| slr1591  | G0:0048518 | <1e-4 | slr7025  | G0:0044281 | <1e-4 | slr0285  | G0:0034654 | <1e-4 | sll0327  | G0:0015075 | <1e-4 | slr1964  | G0:0003676 | 0.117  |
| sll10103 | G0:0034641 | <1e-4 | sll0931  | G0:0019752 | <1e-4 | sll1265  | G0:0006721 | <1e-4 | slr7059  | G0:0022892 | <1e-4 | slr0770  | G0:0003676 | 0.117  |
| slr1566  | G0:0072527 | <1e-4 | slr0634  | G0:0051179 | <1e-4 | ssr6019  | G0:0006721 | <1e-4 | slr1396  | G0:0016746 | <1e-4 | slr1210  | G0:0003676 | 0.117  |
| slr0092  | G0:0009161 | <1e-4 | sll10174 | G0:0072528 | <1e-4 | ss12814  | G0:0044260 | <1e-4 | ssr2551  | G0:0015291 | <1e-4 | sll10414 | G0:0003676 | 0.117  |
| slr0865  | G0:0046164 | <1e-4 | sll11541 | G0:0044283 | <1e-4 | slr0723  | G0:0009263 | <1e-4 | ss10483  | G0:0016818 | <1e-4 | slr1593  | G0:0003676 | 0.117  |
| slr1303  | G0:0006163 | <1e-4 | sll11675 | G0:0009991 | <1e-4 | ssr1499  | G0:0006066 | <1e-4 | ssr3189  | G0:0005342 | <1e-4 | slr0144  | G0:0003676 | 0.117  |
| ssr0336  | G0:0016053 | <1e-4 | slr1177  | G0:0019362 | <1e-4 | slr1658  | G0:0031323 | <1e-4 | slr0148  | G0:0016462 | <1e-4 | ss10352  | G0:0003676 | 0.117  |
| sll11702 | G0:0045184 | <1e-4 | slr5077  | G0:0009309 | <1e-4 | sll11784 | G0:0009161 | <1e-4 | sll10478 | G0:0022891 | <1e-4 | slr0723  | G0:0003676 | 0.117  |
| slr2084  | G0:0048518 | <1e-4 | sll11634 | G0:0080090 | <1e-4 | sll10762 | G0:0090304 | <1e-4 | slr1342  | G0:0015405 | <1e-4 | ss10242  | G0:0003676 | 0.117  |
| slr2103  | G0:0046907 | <1e-4 | slr0207  | G0:0080090 | <1e-4 | ssr2317  | G0:0044255 | <1e-4 | ssr3467  | G0:0015267 | <1e-4 | sll11262 | G0:0003676 | 0.117  |
| slr1287  | G0:0071554 | <1e-4 | slr1814  | G0:0009262 | <1e-4 | slr0519  | G0:0006631 | <1e-4 | slr1778  | G0:0042623 | <1e-4 | sll10756 | G0:0003676 | 0.117  |
| slr1614  | G0:0006811 | <1e-4 | ss12384  | G0:0006721 | <1e-4 | slr0491  | G0:0009059 | <1e-4 | sll10444 | G0:0016462 | <1e-4 | sll11613 | G0:0003676 | 0.117  |
| slr1990  | G0:0008150 | <1e-4 | slr0109  | G0:0009892 | <1e-4 | slr7080  | G0:0009056 | <1e-4 | sll10419 | G0:0015077 | <1e-4 | slr1676  | G0:0003676 | 0.117  |
| slr0725  | G0:0051818 | <1e-4 | slr0053  | G0:0044283 | <1e-4 | slr7098  | G0:0009259 | <1e-4 | sll10414 | G0:0015291 | <1e-4 | slr1437  | G0:0003676 | 0.117  |
| sll11060 | G0:0050789 | <1e-4 | slr0770  | G0:0051818 | <1e-4 | slr1047  | G0:0043648 | <1e-4 | slr1383  | G0:0022803 | <1e-4 | slr1084  | G0:0003676 | 0.117  |
| sll10595 | G0:0009057 | <1e-4 | slr6028  | G0:0009893 | <1e-4 | sll15090 | G0:0044281 | <1e-4 | slr0619  | G0:0015075 | <1e-4 | ssr2787  | G0:0003676 | 0.117  |
| sll1396  | G0:0046164 | <1e-4 | slr1557  | G0:0010468 | <1e-4 | slr5112  | G0:0009991 | <1e-4 | slr0919  | G0:0015293 | <1e-4 | sll10645 | G0:0003676 | 0.117  |
| slr1045  | G0:0006766 | <1e-4 | sll1380  | G0:0046128 | <1e-4 | slr7012  | G0:0006220 | <1e-4 | sll11201 | G0:0016746 | <1e-4 | slr0482  | G0:0003676 | 0.117  |
| sll10414 | G0:0019751 | <1e-4 | slr0890  | G0:0009308 | <1e-4 | slr2071  | G0:0019751 | <1e-4 | slr1363  | G0:0008171 | <1e-4 | slr1638  | G0:0003676 | 0.117  |
| slr1726  | G0:0050801 | <1e-4 | sll11222 | G0:0006163 | <1e-4 | slr1915  | G0:0071554 | <1e-4 | sll11289 | G0:0015075 | <1e-4 | slr0408  | G0:0005215 | 0.1167 |
| slr1612  | G0:0009987 | <1e-4 | slr0455  | G0:0044260 | <1e-4 | ssr6026  | G0:0009056 | <1e-4 | sll10532 | G0:0015291 | <1e-4 | sll11250 | G0:0005215 | 0.1167 |
| sm10011  | G0:0009892 | <1e-4 | slr1767  | G0:0009309 | <1e-4 | slr6013  | G0:0022607 | <1e-4 | slr0404  | G0:0022832 | <1e-4 | ssr1258  | G0:0005215 | 0.1167 |
| sll10102 | G0:0009150 | <1e-4 | sll11132 | G0:0044283 | <1e-4 | slr1851  | G0:0006220 | <1e-4 | sll11166 | G0:0042623 | <1e-4 | slr1565  | G0:0005215 | 0.1167 |
| slr2073  | G0:0045184 | <1e-4 | sll10905 | G0:0019219 | <1e-4 | slr0863  | G0:0072528 | <1e-4 | ss11690  | G0:0022891 | <1e-4 | sll11912 | G0:0005215 | 0.1167 |
| ssr3572  | G0:0006066 | <1e-4 | ssr0536  | G0:0044255 | <1e-4 | sll11775 | G0:0044275 | <1e-4 | slr2038  | G0:0022891 | <1e-4 | slr0919  | G0:0005215 | 0.1167 |
| slr0598  | G0:0071841 | <1e-4 | slr1103  | G0:0048523 | <1e-4 | sll17067 | G0:0019222 | <1e-4 | sll15006 | G0:0043167 | <1e-4 | sll10272 | G0:0005215 | 0.1167 |
| sll10871 | G0:0009987 | <1e-4 | sll11785 | G0:0050794 | <1e-4 | slr1438  | G0:0051716 | <1e-4 | sll10980 | G0:0016817 | <1e-4 | slr1774  | G0:0005215 | 0.1163 |
| sll11461 | G0:0019222 | <1e-4 | slr0299  | G0:0031640 | <1e-4 | sll10069 | G0:0009059 | <1e-4 | slr0489  | G0:0008171 | <1e-4 | sll11528 | G0:0005215 | 0.1163 |
| slr0482  | G0:0046128 | <1e-4 | sll11186 | G0:0044281 | <1e-4 | slr5013  | G0:0042180 | <1e-4 | ssr7093  | G0:0008171 | <1e-4 | sll11222 | G0:0005215 | 0.1163 |
| sll11155 | G0:0031323 | <1e-4 | slr0689  | G0:0052188 | <1e-4 | slr6081  | G0:0046483 | <1e-4 | ss16061  | G0:0022838 | <1e-4 | slr0147  | G0:0005215 | 0.1163 |
| slr1789  | G0:0043436 | <1e-4 | slr1431  | G0:0051171 | <1e-4 | slr0393  | G0:0009308 | <1e-4 | sll10447 | G0:0022803 | <1e-4 | slr0642  | G0:0005215 | 0.1163 |
| sll11926 | G0:0044281 | <1e-4 | slr0869  | G0:0072521 | <1e-4 | sll17062 | G0:0034641 | <1e-4 | slr1773  | G0:0015291 | <1e-4 | slr0818  | G0:0005215 | 0.1163 |
| slr6015  | G0:0009141 | <1e-4 | slr1342  | G0:0044283 | <1e-4 | slr0708  | G0:0006811 | <1e-4 | sll11882 | G0:0015405 | <1e-4 | sll11995 | G0:0005215 | 0.1163 |
| slr1376  | G0:0051347 | <1e-4 | slr1495  | G0:0016054 | <1e-4 | ss13451  | G0:0009991 | <1e-4 | slr6063  | G0:0043167 | <1e-4 | sll11272 | G0:0005215 | 0.1163 |
| ssr2912  | G0:0009117 | <1e-4 | slr0519  | G0:0009123 | <1e-4 | slr8014  | G0:0009394 | <1e-4 | sll10843 | G0:0015405 | <1e-4 | slr0765  | G0:0005215 | 0.1163 |
| slr0480  | G0:0009142 | <1e-4 | sll10639 | G0:0080090 | <1e-4 | slr6045  | G0:0034660 | <1e-4 | ssr5092  | G0:0022836 | <1e-4 | ssr0692  | G0:0005215 | 0.1163 |
| slr0250  | G0:0071841 | <1e-4 | slr1863  | G0:0009259 | <1e-4 | slr1398  | G0:0071496 | <1e-4 | slr1450  | G0:0043492 | <1e-4 | slr5126  | G0:0006810 | 0.1161 |
| sll10249 | G0:0006091 | <1e-4 | slr0249  | G0:0071840 | <1e-4 | slr0192  | G0:0044248 | <1e-4 | ssr2201  | G0:0022803 | <1e-4 | ssr3572  | G0:0006810 | 0.1161 |
| sll11089 | G0:0034641 | <1e-4 | ssr5121  | G0:0006631 | <1e-4 | ss12733  | G0:0051186 | <1e-4 | slr0742  | G0:0016817 | <1e-4 | sll16055 | G0:0006810 | 0.1161 |
| sll10405 | G0:0009059 | <1e-4 | ss10410  | G0:0048523 | <1e-4 | slr0921  | G0:0072524 | <1e-4 | sll10499 | G0:0003674 | <1e-4 | ssr6019  | G0:0006810 | 0.1161 |
| sll10740 | G0:0050896 | <1e-4 | sll10787 | G0:0006220 | <1e-4 | sll11532 | G0:0009126 | <1e-4 | slr1623  | G0:0022832 | <1e-4 | slr1752  | G0:0006810 | 0.1161 |
| sll11949 | G0:0051186 | <1e-4 | slr6049  | G0:0009056 | <1e-4 | sll11925 | G0:0050789 | <1e-4 | slr0876  | G0:0016741 | <1e-4 | ss16061  | G0:0006810 | 0.1161 |
| slr1813  | G0:0022411 | <1e-4 | sll15003 | G0:0006766 | <1e-4 | sll11318 | G0:0046164 | <1e-4 | sll11040 | G0:0043167 | <1e-4 | slr5073  | G0:0006810 | 0.1161 |
| sll15006 | G0:0042455 | <1e-4 | sll11164 | G0:0048518 | <1e-4 | slr0980  | G0:0055114 | <1e-4 | sll10168 | G0:0016741 | <1e-4 | sll11164 | G0:0006810 | 0.1161 |
| sll10473 | G0:0072528 | <1e-4 | slr1117  | G0:0016054 | <1e-4 | slr1726  | G0:0060255 | <1e-4 | slr1896  | G0:0016818 | <1e-4 | slr0967  | G0:0006810 | 0.1161 |
| sll10762 | G0:0006066 | <1e-4 | slr2000  | G0:0090304 | <1e-4 | slr2118  | G0:0071840 | <1e-4 | sll11321 | G0:0043167 | <1e-4 | sll11891 | G0:0006810 | 0.1161 |
| slr2111  | G0:0019362 | <1e-4 | ssr0761  | G0:0044282 | <1e-4 | sll11217 | G0:0022411 | <1e-4 | sll10424 | G0:0015405 | <1e-4 | slr2070  | G0:0006810 | 0.1161 |
| ssr3341  | G0:0050789 | <1e-4 | sll11659 | G0:0050794 | <1e-4 | ss12420  | G0:0022607 | <1e-4 | slr1940  | G0:0015399 | <1e-4 | ssr5074  | G0:0006810 | 0.1161 |
| sll17089 | G0:0009987 | <1e-4 | sll11934 | G0:0044271 | <1e-4 | sll10630 | G0:0006753 | <1e-4 | sll11532 | G0:0043492 | <1e-4 | sll10372 | G0:0006810 | 0.1161 |
| slr0496  | G0:0009889 | <1e-4 | sll10350 | G0:0019222 | <1e-4 | slr1383  | G0:0019219 | <1e-4 | slr7102  | G0:0016462 | <1e-4 | ss17039  | G0:0006810 | 0.1161 |
| sll10811 | G0:0009144 | <1e-4 | ss18028  | G0:0031326 | <1e-4 | ss15031  | G0:0009991 | <1e-4 | slr0243  | G0:0022838 | <1e-4 | slr0238  | G0:0006810 | 0.1161 |

ssl1577 G0:0055082 <1e-4 s1r0516 G0:0044106 <1e-4 s111340 G0:0006066 <1e-4 s110293 G0:0022803 <1e-4 s1r0948 G0:0006810 0.1161  
s111272 G0:0008610 <1e-4 s110446 G0:0044271 <1e-4 s1r1045 G0:0006811 <1e-4 s1r0888 G0:0005342 <1e-4 s117033 G0:0006810 0.1161  
s111942 G0:0009056 <1e-4 s1r3154 G0:0048878 <1e-4 s1r17039 G0:0071496 <1e-4 s1r0656 G0:0022836 <1e-4 s111583 G0:0006810 0.1161  
s1r2111 G0:0048523 <1e-4 s1r0871 G0:0019752 <1e-4 s110980 G0:0071841 <1e-4 s111526 G0:0022891 <1e-4 s110608 G0:0006810 0.1161  
s111766 G0:0051246 <1e-4 s1r1097 G0:0006733 <1e-4 s111853 G0:0009126 <1e-4 s1r0699 G0:0005342 <1e-4 s111036 G0:0006810 0.1161  
s110482 G0:0009308 <1e-4 s1r2012 G0:0009144 <1e-4 s117067 G0:0060255 <1e-4 s110488 G0:0022891 <1e-4 s110905 G0:0006810 0.1161  
s1r0569 G0:0009199 <1e-4 s1r0294 G0:0006576 <1e-4 s1r0407 G0:0009987 <1e-4 s1r1767 G0:0043167 <1e-4 s110479 G0:0006810 0.1161  
s110513 G0:0019637 <1e-4 s110647 G0:0009124 <1e-4 s1r0232 G0:0006721 <1e-4 s115098 G0:0022890 <1e-4 s110298 G0:0006810 0.1161  
s111925 G0:0009141 <1e-4 s111024 G0:0006082 <1e-4 s111396 G0:0046907 <1e-4 s111025 G0:0003674 <1e-4 s111158 G0:0006810 0.1161  
s111652 G0:0006721 <1e-4 s110301 G0:0051716 <1e-4 s1r0680 G0:0006732 <1e-4 s111527 G0:0022891 <1e-4 s1r1577 G0:0006810 0.1161  
ssl1046 G0:0006811 <1e-4 s111863 G0:0008150 <1e-4 s1r0709 G0:0009150 <1e-4 s1r2781 G0:0043167 <1e-4 s111495 G0:0006810 0.1161  
s1r6063 G0:0006220 <1e-4 s1r0545 G0:0019222 <1e-4 s110558 G0:0009141 <1e-4 s115095 G0:0022890 <1e-4 s1r6106 G0:0006810 0.1161  
s1r7012 G0:0009056 <1e-4 s1r7083 G0:0009308 <1e-4 s1r0038 G0:0052188 <1e-4 s1r1676 G0:0022890 <1e-4 s110062 G0:0006810 0.1161  
s1r1814 G0:0006733 <1e-4 s1r0491 G0:0071842 <1e-4 s1r6019 G0:0055114 <1e-4 s1r0509 G0:0022803 <1e-4 s111785 G0:0006810 0.1161  
s115097 G0:0090304 <1e-4 s1r0863 G0:0006576 <1e-4 s1r0335 G0:0046483 <1e-4 s1r0579 G0:0015405 <1e-4 s1r1951 G0:0006810 0.1161  
ssl1417 G0:0010556 <1e-4 s1r0962 G0:0042451 <1e-4 s1r1087 G0:0019219 <1e-4 s1r6062 G0:0015077 <1e-4 s1r0575 G0:0006810 0.1161  
s111573 G0:0005996 <1e-4 s111530 G0:0009394 <1e-4 s111832 G0:0043436 <1e-4 s1r6021 G0:0022857 <1e-4 s111300 G0:0006810 0.1161  
s111495 G0:0051246 <1e-4 s1r1964 G0:0019219 <1e-4 s1r0579 G0:0060255 <1e-4 s1r1082 G0:0043492 <1e-4 s1r1394 G0:0006810 0.1161  
s1r1766 G0:0045184 <1e-4 s1r2125 G0:0019222 <1e-4 s1r7100 G0:0044281 <1e-4 s111906 G0:0022857 <1e-4 s115100 G0:0006810 0.1161  
s1r0380 G0:0046128 <1e-4 s111396 G0:0006066 <1e-4 s1r1406 G0:0046128 <1e-4 s1r1074 G0:0015077 <1e-4 s1r0708 G0:0006810 0.1161  
s111925 G0:0009132 <1e-4 s1r1437 G0:0006576 <1e-4 s111934 G0:0006811 <1e-4 s1r7017 G0:0016817 <1e-4 s110543 G0:0006810 0.1161  
s110997 G0:0034641 <1e-4 s117086 G0:0006753 <1e-4 s1r8044 G0:0016053 <1e-4 s111022 G0:0022892 <1e-4 s1r1513 G0:0006810 0.1161  
s111939 G0:0080090 <1e-4 s1r0818 G0:0080090 <1e-4 s1r7016 G0:0052188 <1e-4 s1r0300 G0:0043492 <1e-4 s115089 G0:0006810 0.1161  
s1r1468 G0:0006091 <1e-4 s111464 G0:0009141 <1e-4 s1r1391 G0:0031640 <1e-4 s1r1866 G0:0060089 <1e-4 s1r6083 G0:0006810 0.1161  
s1r6064 G0:0080090 <1e-4 s110242 G0:0009308 <1e-4 s111702 G0:0055086 <1e-4 s1r0358 G0:0005342 <1e-4 s1r2553 G0:0006810 0.1161  
s1r0601 G0:0005996 <1e-4 s110310 G0:0009132 <1e-4 s1r1396 G0:0072524 <1e-4 s1r7080 G0:0022890 <1e-4 s117087 G0:0006810 0.1161  
s111656 G0:0051188 <1e-4 s1r0978 G0:0006811 <1e-4 s1r0545 G0:0043436 <1e-4 s1r1852 G0:0022836 <1e-4 s115030 G0:0006810 0.1161  
s1r8047 G0:0046128 <1e-4 s117067 G0:0009987 <1e-4 s110710 G0:0050801 <1e-4 s1r0440 G0:0022890 <1e-4 s1r7079 G0:0006810 0.1161  
s110558 G0:0006733 <1e-4 s110756 G0:0043648 <1e-4 s111321 G0:0065007 <1e-4 s111307 G0:0015291 <1e-4 s1r0184 G0:0006810 0.1161  
s1r1095 G0:0071840 <1e-4 s111656 G0:0034641 <1e-4 s1r6031 G0:0006811 <1e-4 s1r6016 G0:0016462 <1e-4 s1r6088 G0:0006810 0.1161  
s110586 G0:0051716 <1e-4 s1r1999 G0:0034641 <1e-4 s111736 G0:0009308 <1e-4 s1r1339 G0:0022890 <1e-4 s111052 G0:0006810 0.1161  
s110414 G0:0001932 <1e-4 s111640 G0:0043933 <1e-4 s111942 G0:0072524 <1e-4 s1r0848 G0:0015075 <1e-4 s1r1816 G0:0006810 0.1161  
s111763 G0:0019752 <1e-4 s117033 G0:0009124 <1e-4 s1r0725 G0:0051179 <1e-4 s1r0712 G0:0015075 <1e-4 s1r1915 G0:0006810 0.1161  
s1r0147 G0:0033013 <1e-4 s111071 G0:0044106 <1e-4 s1r1799 G0:0046394 <1e-4 s1r7080 G0:0022803 <1e-4 s1r2060 G0:0006810 0.1161  
s111640 G0:0052111 <1e-4 s1r1315 G0:0009059 <1e-4 s1r0740 G0:0009262 <1e-4 s110174 G0:0016817 <1e-4 s1r0914 G0:0006810 0.1161  
s1r5118 G0:0050789 <1e-4 s1r0625 G0:0051716 <1e-4 s111882 G0:0016053 <1e-4 s110611 G0:0022892 <1e-4 s1r7099 G0:0006810 0.1161  
s1r0619 G0:0050896 <1e-4 s111934 G0:0006091 <1e-4 s112733 G0:0034660 <1e-4 s115003 G0:0022890 <1e-4 s110410 G0:0006810 0.1161  
s1r6100 G0:0051347 <1e-4 s1r0935 G0:0006220 <1e-4 s111873 G0:0072528 <1e-4 s111273 G0:0005342 <1e-4 s1r8047 G0:0006810 0.1161  
s1r0582 G0:0009199 <1e-4 s1r7059 G0:0009059 <1e-4 s112138 G0:0042180 <1e-4 s115103 G0:0015267 <1e-4 s111191 G0:0006810 0.1161  
s1r6065 G0:0044275 <1e-4 s111830 G0:0051234 <1e-4 s1r0168 G0:0006720 <1e-4 s1r7013 G0:0022890 <1e-4 s1r0313 G0:0006810 0.1161  
s1r0914 G0:0055114 <1e-4 s1r1667 G0:0010556 <1e-4 s1r1045 G0:0046907 <1e-4 s1r0039 G0:0005342 <1e-4 s110691 G0:0006810 0.1161  
s110022 G0:0071842 <1e-4 s1r1568 G0:0043170 <1e-4 s1r7080 G0:0009263 <1e-4 s111442 G0:0005342 <1e-4 s110552 G0:0006810 0.1161  
s1r0516 G0:0043933 <1e-4 s1r1670 G0:0009144 <1e-4 s1r6020 G0:0009263 <1e-4 s1r5023 G0:0015405 <1e-4 s1r0013 G0:0006810 0.1161  
s111542 G0:0051188 <1e-4 s1r0594 G0:0072528 <1e-4 s111675 G0:0031640 <1e-4 s1r1699 G0:0022892 <1e-4 s1r425 G0:0006810 0.1161  
s113829 G0:0044271 <1e-4 s1r2000 G0:0031323 <1e-4 s1r1142 G0:0034654 <1e-4 s1r7013 G0:0022891 <1e-4 s111652 G0:0006810 0.1161  
s115026 G0:0050801 <1e-4 s1r1648 G0:0006793 <1e-4 s111736 G0:0022411 <1e-4 s1r6015 G0:0015405 <1e-4 s1r1442 G0:0006810 0.1161  
s1r1095 G0:0009056 <1e-4 s1r0780 G0:0048878 <1e-4 s111656 G0:0052111 <1e-4 s111162 G0:0015405 <1e-4 s1118019 G0:0006810 0.1161  
s1r0845 G0:0051179 <1e-4 s1r5077 G0:0044260 <1e-4 s1r5118 G0:0051171 <1e-4 s1r0489 G0:0043492 <1e-4 s1r0590 G0:0006810 0.1161  
s110761 G0:0051179 <1e-4 s110553 G0:0006720 <1e-4 s1r7010 G0:0006793 <1e-4 s115033 G0:0015399 <1e-4 s1r0667 G0:0006810 0.1161  
s110577 G0:0043933 <1e-4 s1r2120 G0:0009308 <1e-4 s1r1053 G0:0010556 <1e-4 s111036 G0:0015267 <1e-4 s1r1170 G0:0006810 0.1161  
s1r1599 G0:0006811 <1e-4 s110670 G0:0046164 <1e-4 s111201 G0:0009263 <1e-4 s110216 G0:0022836 <1e-4 s1r8022 G0:0006810 0.1161  
s110405 G0:0009056 <1e-4 s110739 G0:0051171 <1e-4 s111300 G0:0006720 <1e-4 s1r1601 G0:0015291 <1e-4 s1r5102 G0:0006810 0.1161  
s1r6033 G0:0065007 <1e-4 s1r0579 G0:0034654 <1e-4 s1r0581 G0:0043933 <1e-4 s1r3304 G0:0003674 <1e-4 s1r3467 G0:0006810 0.1161  
s111388 G0:0052188 <1e-4 s110793 G0:0044271 <1e-4 s117033 G0:0046164 <1e-4 s110419 G0:0016746 <1e-4 s111233 G0:0006810 0.1161



|          |            |       |          |            |       |          |            |       |          |            |       |          |            |        |
|----------|------------|-------|----------|------------|-------|----------|------------|-------|----------|------------|-------|----------|------------|--------|
| sl11222  | G0:0051347 | <1e-4 | slr0680  | G0:0044248 | <1e-4 | slr0263  | G0:0046907 | <1e-4 | slr0801  | G0:0016817 | <1e-4 | slr5013  | G0:0006810 | 0.1161 |
| slr1895  | G0:0019752 | <1e-4 | slr1462  | G0:0006733 | <1e-4 | sl11675  | G0:0009141 | <1e-4 | slr0345  | G0:0043492 | <1e-4 | sl11106  | G0:0006810 | 0.1161 |
| slr1083  | G0:0009142 | <1e-4 | slr0453  | G0:0006733 | <1e-4 | slr1657  | G0:0022411 | <1e-4 | slr6080  | G0:0015405 | <1e-4 | ssr3570  | G0:0006810 | 0.1161 |
| slr1195  | G0:0072524 | <1e-4 | slr1599  | G0:0048523 | <1e-4 | ss11046  | G0:0072527 | <1e-4 | slr0960  | G0:0016817 | <1e-4 | ss15114  | G0:0006810 | 0.1161 |
| sl11068  | G0:0071841 | <1e-4 | sl11455  | G0:0043648 | <1e-4 | slr1406  | G0:0031640 | <1e-4 | sl10068  | G0:0015291 | <1e-4 | sl10060  | G0:0006810 | 0.1161 |
| slr0876  | G0:0071554 | <1e-4 | ssr3122  | G0:0019751 | <1e-4 | slr1546  | G0:0006091 | <1e-4 | slr7071  | G0:0005342 | <1e-4 | sl11609  | G0:0006810 | 0.1161 |
| sl11163  | G0:0045184 | <1e-4 | sl110188 | G0:0019751 | <1e-4 | sl11433  | G0:0006811 | <1e-4 | slr1353  | G0:0016817 | <1e-4 | sl17089  | G0:0006810 | 0.1161 |
| sl11052  | G0:0009059 | <1e-4 | sl11504  | G0:0065007 | <1e-4 | slr1032  | G0:0050789 | <1e-4 | sl11043  | G0:0043492 | <1e-4 | slr1507  | G0:0006810 | 0.1161 |
| slr6090  | G0:0072521 | <1e-4 | ssr7035  | G0:0006732 | <1e-4 | slr1624  | G0:0009141 | <1e-4 | slr1885  | G0:0042623 | <1e-4 | slr0458  | G0:0006810 | 0.1161 |
| ss17039  | G0:0044282 | <1e-4 | ssr3341  | G0:0016054 | <1e-4 | ssr5106  | G0:0009260 | <1e-4 | sl10872  | G0:0022891 | <1e-4 | slr0755  | G0:0006810 | 0.1161 |
| slr1780  | G0:0055114 | <1e-4 | sl110175 | G0:0051186 | <1e-4 | sl11155  | G0:0051234 | <1e-4 | ss17042  | G0:0022857 | <1e-4 | slr1537  | G0:0006810 | 0.1161 |
| ssr2755  | G0:0009150 | <1e-4 | sl11511  | G0:0048522 | <1e-4 | slr0431  | G0:0010556 | <1e-4 | sl11785  | G0:0022832 | <1e-4 | ss15103  | G0:0006810 | 0.1161 |
| slr6087  | G0:0006091 | <1e-4 | sl110024 | G0:0006793 | <1e-4 | sl110060 | G0:0009059 | <1e-4 | sl11089  | G0:0022892 | <1e-4 | ss11918  | G0:0006810 | 0.1161 |
| ssr3122  | G0:0009260 | <1e-4 | sl110428 | G0:0006091 | <1e-4 | slr1425  | G0:0042451 | <1e-4 | sl10980  | G0:0008171 | <1e-4 | ss15025  | G0:0006810 | 0.1161 |
| ssr6089  | G0:0050789 | <1e-4 | sl110176 | G0:0009144 | <1e-4 | slr0407  | G0:0006720 | <1e-4 | ss17045  | G0:0003674 | <1e-4 | sl11702  | G0:0006810 | 0.1161 |
| slr0326  | G0:0009142 | <1e-4 | slr1659  | G0:0006631 | <1e-4 | slr1307  | G0:0048518 | <1e-4 | sl11219  | G0:0015399 | <1e-4 | ss12138  | G0:0006810 | 0.1161 |
| slr1603  | G0:0019219 | <1e-4 | ssr1407  | G0:0051716 | <1e-4 | slr7058  | G0:0009123 | <1e-4 | sl11638  | G0:0015075 | <1e-4 | slr0217  | G0:0006810 | 0.1161 |
| ssr6086  | G0:0048522 | <1e-4 | ss17039  | G0:0006766 | <1e-4 | slr0845  | G0:0044003 | <1e-4 | slr1895  | G0:0016741 | <1e-4 | slr7100  | G0:0006810 | 0.1161 |
| sl17077  | G0:0046483 | <1e-4 | ss12781  | G0:0034660 | <1e-4 | slr0498  | G0:0044275 | <1e-4 | slr1628  | G0:0015399 | <1e-4 | slr0517  | G0:0006810 | 0.1161 |
| slr0023  | G0:0050896 | <1e-4 | sl110436 | G0:0055086 | <1e-4 | slr6066  | G0:0043170 | <1e-4 | slr1263  | G0:0022836 | <1e-4 | slr1163  | G0:0006810 | 0.1161 |
| sl110786 | G0:0048523 | <1e-4 | sl11950  | G0:0006732 | <1e-4 | sl110319 | G0:0065007 | <1e-4 | sl18032  | G0:0015405 | <1e-4 | sl17055  | G0:0006810 | 0.1161 |
| slr1780  | G0:0016052 | <1e-4 | slr0204  | G0:0034654 | <1e-4 | slr0587  | G0:0051347 | <1e-4 | sl11239  | G0:0042623 | <1e-4 | slr5112  | G0:0006810 | 0.1161 |
| slr0656  | G0:0043648 | <1e-4 | sl110564 | G0:0019752 | <1e-4 | sl11447  | G0:0009262 | <1e-4 | slr1431  | G0:0016829 | <1e-4 | sl11049  | G0:0006810 | 0.1161 |
| ssr0102  | G0:0071554 | <1e-4 | slr7015  | G0:0072522 | <1e-4 | slr1917  | G0:0009056 | <1e-4 | ss17021  | G0:0042623 | <1e-4 | sl11319  | G0:0006810 | 0.1161 |
| slr1261  | G0:0019222 | <1e-4 | sl110749 | G0:0006220 | <1e-4 | slr0967  | G0:0019362 | <1e-4 | slr0742  | G0:0022891 | <1e-4 | slr2103  | G0:0006810 | 0.1161 |
| sl11380  | G0:0009056 | <1e-4 | ssr1558  | G0:0048523 | <1e-4 | sl110676 | G0:0019222 | <1e-4 | sl11289  | G0:0016462 | <1e-4 | ssr1041  | G0:0006810 | 0.1161 |
| slr7096  | G0:0031640 | <1e-4 | slr0708  | G0:0006732 | <1e-4 | sl110775 | G0:0019637 | <1e-4 | sl110793 | G0:0016741 | <1e-4 | ss10350  | G0:0006810 | 0.1161 |
| sl11372  | G0:0051234 | <1e-4 | ss12471  | G0:0043648 | <1e-4 | ssr5074  | G0:0009889 | <1e-4 | slr7057  | G0:0015399 | <1e-4 | slr0670  | G0:0006810 | 0.1161 |
| sl110047 | G0:0046128 | <1e-4 | ss11577  | G0:0051186 | <1e-4 | sl110524 | G0:0043648 | <1e-4 | sl110854 | G0:0022838 | <1e-4 | slr5102  | G0:0016491 | 0.116  |
| ssr6030  | G0:0005996 | <1e-4 | slr0489  | G0:0009165 | <1e-4 | slr7011  | G0:0050789 | <1e-4 | slr1624  | G0:0022803 | <1e-4 | slr1790  | G0:0016491 | 0.116  |
| sl15030  | G0:0034641 | <1e-4 | slr0144  | G0:0031323 | <1e-4 | slr2144  | G0:0072528 | <1e-4 | slr1025  | G0:0003674 | <1e-4 | sl11254  | G0:0016491 | 0.116  |
| slr1533  | G0:0006066 | <1e-4 | sl111873 | G0:0022411 | <1e-4 | slr1444  | G0:0006811 | <1e-4 | slr1895  | G0:0022832 | <1e-4 | sl110749 | G0:0016491 | 0.116  |
| slr1612  | G0:0009260 | <1e-4 | slr0238  | G0:0071841 | <1e-4 | ss15031  | G0:0006811 | <1e-4 | sl110007 | G0:0016462 | <1e-4 | ssr1558  | G0:0016491 | 0.116  |
| slr6028  | G0:0071554 | <1e-4 | ssr7035  | G0:0009056 | <1e-4 | slr0594  | G0:0050794 | <1e-4 | sl110297 | G0:0022892 | <1e-4 | ss17051  | G0:0016491 | 0.116  |
| slr2070  | G0:0046128 | <1e-4 | slr2121  | G0:0042180 | <1e-4 | sl11442  | G0:0009165 | <1e-4 | sl110518 | G0:0005575 | <1e-4 | slr1449  | G0:0016491 | 0.116  |
| sl110022 | G0:0051716 | <1e-4 | ss18003  | G0:0010468 | <1e-4 | sl110443 | G0:0043648 | <1e-4 | ss17045  | G0:0044446 | <1e-4 | slr5087  | G0:0016491 | 0.116  |
| sl110238 | G0:0044271 | <1e-4 | slr0959  | G0:0046164 | <1e-4 | sl111726 | G0:0006091 | <1e-4 | sl110944 | G0:0044464 | <1e-4 | sl11380  | G0:0016491 | 0.116  |
| sl15089  | G0:0071841 | <1e-4 | slr1907  | G0:0006732 | <1e-4 | sl111262 | G0:0042451 | <1e-4 | slr1362  | G0:0044444 | <1e-4 | sl110162 | G0:0016491 | 0.116  |
| slr0169  | G0:0071554 | <1e-4 | slr0491  | G0:0031640 | <1e-4 | sl110639 | G0:0009259 | <1e-4 | sl115090 | G0:0044425 | <1e-4 | slr8021  | G0:0016491 | 0.116  |
| sl11640  | G0:0072522 | <1e-4 | slr6068  | G0:0006066 | <1e-4 | slr0269  | G0:0051188 | <1e-4 | slr1664  | G0:0005575 | <1e-4 | slr0039  | G0:0016491 | 0.116  |
| slr0392  | G0:0009260 | <1e-4 | ss11300  | G0:0009056 | <1e-4 | slr2018  | G0:0051171 | <1e-4 | sl110265 | G0:0005575 | <1e-4 | slr5126  | G0:0016491 | 0.116  |
| ss13829  | G0:0050896 | <1e-4 | sl110503 | G0:0008150 | <1e-4 | slr0935  | G0:0046483 | <1e-4 | sl110359 | G0:0043226 | <1e-4 | slr0345  | G0:0016491 | 0.116  |
| sl110656 | G0:0051246 | <1e-4 | slr5012  | G0:0009057 | <1e-4 | slr0211  | G0:0034660 | <1e-4 | slr0374  | G0:0044446 | <1e-4 | sl110047 | G0:0016491 | 0.116  |
| slr0601  | G0:0045184 | <1e-4 | slr1436  | G0:0071840 | <1e-4 | ssr6085  | G0:0009199 | <1e-4 | slr1301  | G0:0044425 | <1e-4 | slr1628  | G0:0016491 | 0.116  |
| ssr6024  | G0:0019222 | <1e-4 | ss12148  | G0:0043170 | <1e-4 | slr0680  | G0:0050789 | <1e-4 | sl110263 | G0:0044446 | <1e-4 | sl110875 | G0:0016491 | 0.116  |
| slr7011  | G0:0046164 | <1e-4 | slr0376  | G0:0051818 | <1e-4 | sl111563 | G0:0072528 | <1e-4 | sl111934 | G0:0005575 | <1e-4 | sl110098 | G0:0016491 | 0.116  |
| slr1170  | G0:0009262 | <1e-4 | slr1614  | G0:0046164 | <1e-4 | sl111656 | G0:0051716 | <1e-4 | sl111737 | G0:0005575 | <1e-4 | slr0708  | G0:0016491 | 0.116  |
| slr0476  | G0:0006082 | <1e-4 | sl11344  | G0:0006811 | <1e-4 | sl111926 | G0:0009987 | <1e-4 | slr1998  | G0:0044446 | <1e-4 | slr1944  | G0:0016491 | 0.116  |
| ssr2551  | G0:0044260 | <1e-4 | sl115090 | G0:0051818 | <1e-4 | slr11178 | G0:0042180 | <1e-4 | slr0023  | G0:0044422 | <1e-4 | sl117006 | G0:0016491 | 0.116  |
| slr2018  | G0:0016053 | <1e-4 | ssr1258  | G0:0034641 | <1e-4 | slr1990  | G0:0009150 | <1e-4 | slr0664  | G0:0044446 | <1e-4 | slr0885  | G0:0016491 | 0.116  |
| slr0579  | G0:0072522 | <1e-4 | slr0285  | G0:0051171 | <1e-4 | slr1083  | G0:0009991 | <1e-4 | slr1263  | G0:0043226 | <1e-4 | ss11046  | G0:0016491 | 0.116  |
| sl11766  | G0:0044003 | <1e-4 | slr7100  | G0:0006220 | <1e-4 | slr6100  | G0:0048522 | <1e-4 | sl110547 | G0:0044422 | <1e-4 | slr6009  | G0:0016491 | 0.116  |
| sl11306  | G0:0019222 | <1e-4 | ss10787  | G0:0071842 | <1e-4 | slr1619  | G0:0044255 | <1e-4 | sl110063 | G0:0044424 | <1e-4 | slr1970  | G0:0016491 | 0.116  |
| sl10405  | G0:0009161 | <1e-4 | slr1603  | G0:0080090 | <1e-4 | sl110328 | G0:0052188 | <1e-4 | slr1152  | G0:0005575 | <1e-4 | slr1438  | G0:0016491 | 0.116  |

|         |            |       |         |            |       |         |            |       |         |            |       |         |            |       |
|---------|------------|-------|---------|------------|-------|---------|------------|-------|---------|------------|-------|---------|------------|-------|
| ss15099 | G0:0016054 | <1e-4 | slr0168 | G0:0005996 | <1e-4 | sl10810 | G0:0055086 | <1e-4 | slr1638 | G0:0044422 | <1e-4 | sl11652 | G0:0016491 | 0.116 |
| sl10577 | G0:0048522 | <1e-4 | ssr2439 | G0:0009892 | <1e-4 | slr1896 | G0:0016052 | <1e-4 | slr0383 | G0:0044424 | <1e-4 | ssr2998 | G0:0016491 | 0.116 |
| slr1444 | G0:0006733 | <1e-4 | sl15069 | G0:0019752 | <1e-4 | slr1436 | G0:0072528 | <1e-4 | slr6091 | G0:0005575 | <1e-4 | ssr5106 | G0:0016491 | 0.116 |
| slr0637 | G0:0006576 | <1e-4 | sl10925 | G0:0042451 | <1e-4 | ss13382 | G0:0019637 | <1e-4 | slr0709 | G0:0043226 | <1e-4 | slr2052 | G0:0016491 | 0.116 |
| slr0924 | G0:0044260 | <1e-4 | slr0195 | G0:0090304 | <1e-4 | ssr7079 | G0:0042455 | <1e-4 | sl11586 | G0:0044446 | <1e-4 | ss12069 | G0:0016491 | 0.116 |
| sl11188 | G0:0009141 | <1e-4 | slr0151 | G0:0071840 | <1e-4 | slr1927 | G0:0006733 | <1e-4 | slr6014 | G0:0044446 | <1e-4 | sl10765 | G0:0016491 | 0.116 |
| slr6090 | G0:0051186 | <1e-4 | slr2052 | G0:0034641 | <1e-4 | sl12011 | G0:0072521 | <1e-4 | ssr6003 | G0:0043226 | <1e-4 | slr0914 | G0:0016491 | 0.116 |
| sl10369 | G0:0006733 | <1e-4 | slr1812 | G0:0009123 | <1e-4 | ssr2201 | G0:0060255 | <1e-4 | sl10072 | G0:0044424 | <1e-4 | sl11233 | G0:0016491 | 0.116 |
| slr1079 | G0:0051818 | <1e-4 | slr1363 | G0:0006753 | <1e-4 | slr0270 | G0:0045184 | <1e-4 | slr1799 | G0:0044424 | <1e-4 | slr1396 | G0:0016491 | 0.116 |
| ss12717 | G0:0048523 | <1e-4 | slr1951 | G0:0072521 | <1e-4 | slr1062 | G0:0009263 | <1e-4 | sl10645 | G0:0005575 | <1e-4 | ssr5121 | G0:0016491 | 0.116 |
| slr7059 | G0:0006811 | <1e-4 | slr0058 | G0:0048523 | <1e-4 | slr1378 | G0:0006732 | <1e-4 | sl11388 | G0:0044425 | <1e-4 | sl15063 | G0:0016491 | 0.116 |
| slr1704 | G0:0019362 | <1e-4 | slr7012 | G0:0009260 | <1e-4 | slr0172 | G0:0009308 | <1e-4 | sl10710 | G0:0044422 | <1e-4 | sl18019 | G0:0016491 | 0.116 |
| sl10183 | G0:0006066 | <1e-4 | slr0751 | G0:0051716 | <1e-4 | sl11219 | G0:0019222 | <1e-4 | slr6073 | G0:0044425 | <1e-4 | ss13829 | G0:0016491 | 0.116 |
| ssr7017 | G0:0048519 | <1e-4 | slr0740 | G0:0051716 | <1e-4 | slr0729 | G0:0090304 | <1e-4 | sl10237 | G0:0005575 | <1e-4 | slr1142 | G0:0016491 | 0.116 |
| sl11352 | G0:0048523 | <1e-4 | sl17069 | G0:0046483 | <1e-4 | sl10760 | G0:0006753 | <1e-4 | slr1034 | G0:0044425 | <1e-4 | ssr1041 | G0:0016491 | 0.116 |
| slr0869 | G0:0019637 | <1e-4 | slr1178 | G0:0051716 | <1e-4 | ss11378 | G0:0009117 | <1e-4 | sl10702 | G0:0044444 | <1e-4 | slr1577 | G0:0016491 | 0.116 |
| sl10913 | G0:0006733 | <1e-4 | sl10803 | G0:0071842 | <1e-4 | slr1259 | G0:0006066 | <1e-4 | slr0111 | G0:0043226 | <1e-4 | sl11486 | G0:0016491 | 0.116 |
| slr7097 | G0:0043648 | <1e-4 | slr1303 | G0:0006082 | <1e-4 | slr1799 | G0:0006721 | <1e-4 | sl10645 | G0:0044446 | <1e-4 | sl15003 | G0:0016491 | 0.116 |
| slr1667 | G0:0048518 | <1e-4 | sl11285 | G0:0044255 | <1e-4 | slr0625 | G0:0009142 | <1e-4 | sl15032 | G0:0044424 | <1e-4 | slr0575 | G0:0016491 | 0.116 |
| slr0625 | G0:0009165 | <1e-4 | sl11378 | G0:0044255 | <1e-4 | slr0217 | G0:0051818 | <1e-4 | sl11950 | G0:0044422 | <1e-4 | sl15132 | G0:0016491 | 0.116 |
| sl10298 | G0:0009893 | <1e-4 | slr1263 | G0:0044271 | <1e-4 | slr1537 | G0:0006766 | <1e-4 | sl11965 | G0:0005575 | <1e-4 | sl11532 | G0:0016491 | 0.116 |
| sl10168 | G0:0072528 | <1e-4 | sl11528 | G0:0051716 | <1e-4 | sl10703 | G0:0080090 | <1e-4 | ssr2962 | G0:0043226 | <1e-4 | sl10563 | G0:0016491 | 0.116 |
| ss11263 | G0:0009893 | <1e-4 | slr2060 | G0:0006766 | <1e-4 | sl10301 | G0:0072522 | <1e-4 | slr0388 | G0:0043226 | <1e-4 | slr1101 | G0:0016491 | 0.116 |
| slr2118 | G0:0006721 | <1e-4 | ss15098 | G0:0009059 | <1e-4 | sl10611 | G0:0019637 | <1e-4 | slr1679 | G0:0044446 | <1e-4 | sl18012 | G0:0016491 | 0.116 |
| slr0642 | G0:0009308 | <1e-4 | sl11321 | G0:0009262 | <1e-4 | ssr0336 | G0:0052188 | <1e-4 | sl11240 | G0:0044446 | <1e-4 | sl11192 | G0:0016491 | 0.116 |
| slr0456 | G0:0044106 | <1e-4 | sl10775 | G0:0022607 | <1e-4 | sl17031 | G0:0008150 | <1e-4 | slr1263 | G0:0044464 | <1e-4 | ssr7093 | G0:0016491 | 0.116 |
| ssr1766 | G0:0051171 | <1e-4 | sl10397 | G0:0019637 | <1e-4 | ssr6020 | G0:0006576 | <1e-4 | slr2025 | G0:0044464 | <1e-4 | slr0816 | G0:0016491 | 0.116 |
| slr0989 | G0:0008150 | <1e-4 | ssr0335 | G0:0006721 | <1e-4 | ssr1552 | G0:0043648 | <1e-4 | sl18002 | G0:0005575 | <1e-4 | sl10060 | G0:0016491 | 0.116 |
| slr1025 | G0:0009892 | <1e-4 | slr0885 | G0:0009132 | <1e-4 | sl10678 | G0:0006163 | <1e-4 | sl11350 | G0:0044444 | <1e-4 | slr6075 | G0:0016491 | 0.116 |
| slr0458 | G0:0044281 | <1e-4 | sl12006 | G0:0016052 | <1e-4 | slr0588 | G0:0009889 | <1e-4 | slr1851 | G0:0044446 | <1e-4 | sl11381 | G0:0016491 | 0.116 |
| ss15113 | G0:0033013 | <1e-4 | sl18011 | G0:0072521 | <1e-4 | sl10872 | G0:0009893 | <1e-4 | sl11495 | G0:0044424 | <1e-4 | slr0516 | G0:0016491 | 0.116 |
| ss10788 | G0:0048518 | <1e-4 | sl10503 | G0:0009893 | <1e-4 | slr0589 | G0:0009161 | <1e-4 | sl11267 | G0:0005575 | <1e-4 | slr1056 | G0:0016491 | 0.116 |
| ss10787 | G0:0009889 | <1e-4 | sl11757 | G0:0043170 | <1e-4 | slr1667 | G0:0046128 | <1e-4 | slr0590 | G0:0043226 | <1e-4 | slr2071 | G0:0016491 | 0.116 |
| sl10756 | G0:0055086 | <1e-4 | slr1752 | G0:0006082 | <1e-4 | sl11757 | G0:0072524 | <1e-4 | ssr3122 | G0:0044446 | <1e-4 | sl10253 | G0:0016491 | 0.116 |
| slr0364 | G0:0009165 | <1e-4 | ssr3154 | G0:0031640 | <1e-4 | slr1194 | G0:0072521 | <1e-4 | slr1194 | G0:0044422 | <1e-4 | slr0725 | G0:0016491 | 0.116 |
| sl17063 | G0:0005996 | <1e-4 | ssr3122 | G0:0045184 | <1e-4 | slr0770 | G0:0042180 | <1e-4 | slr0013 | G0:0043226 | <1e-4 | ssr0336 | G0:0016491 | 0.116 |
| slr0049 | G0:0048523 | <1e-4 | sl11715 | G0:0048523 | <1e-4 | sl11232 | G0:0072522 | <1e-4 | sl10871 | G0:0044425 | <1e-4 | slr1951 | G0:0016491 | 0.116 |
| slr1513 | G0:0055082 | <1e-4 | ssr3154 | G0:0009262 | <1e-4 | sl11390 | G0:0072521 | <1e-4 | slr0326 | G0:0044425 | <1e-4 | slr1507 | G0:0016491 | 0.116 |
| ssr5074 | G0:0034654 | <1e-4 | slr1069 | G0:0048518 | <1e-4 | sl10875 | G0:0046483 | <1e-4 | sl10355 | G0:0044464 | <1e-4 | sl11164 | G0:0016491 | 0.116 |
| sl10183 | G0:0048523 | <1e-4 | slr1183 | G0:0022607 | <1e-4 | sl10394 | G0:0043933 | <1e-4 | ss17046 | G0:0005575 | <1e-4 | slr1737 | G0:0016491 | 0.116 |
| slr0645 | G0:0006066 | <1e-4 | sl10602 | G0:0006733 | <1e-4 | sl10282 | G0:0019219 | <1e-4 | slr1306 | G0:0044422 | <1e-4 | slr0645 | G0:0016491 | 0.116 |
| slr1638 | G0:0051179 | <1e-4 | sl10623 | G0:0090304 | <1e-4 | slr1614 | G0:0045184 | <1e-4 | sl15006 | G0:0005575 | <1e-4 | ss10410 | G0:0016491 | 0.116 |
| slr0941 | G0:0010556 | <1e-4 | sl10024 | G0:0050801 | <1e-4 | slr7011 | G0:0009144 | <1e-4 | slr0217 | G0:0044444 | <1e-4 | sl10847 | G0:0016491 | 0.116 |
| slr1236 | G0:0051347 | <1e-4 | sl11960 | G0:0048878 | <1e-4 | ssr1552 | G0:0009123 | <1e-4 | sl10436 | G0:0005575 | <1e-4 | sl17089 | G0:0016491 | 0.116 |
| sl11882 | G0:0051179 | <1e-4 | slr1187 | G0:0044255 | <1e-4 | sl11608 | G0:0042455 | <1e-4 | slr6064 | G0:0044425 | <1e-4 | sl10101 | G0:0016491 | 0.116 |
| sl11378 | G0:0080090 | <1e-4 | sl15132 | G0:0048522 | <1e-4 | slr0642 | G0:0006732 | <1e-4 | sl11541 | G0:0044422 | <1e-4 | sl10031 | G0:0016491 | 0.116 |
| sl10710 | G0:0006091 | <1e-4 | slr1875 | G0:0006631 | <1e-4 | slr0885 | G0:0052188 | <1e-4 | slr2111 | G0:0044444 | <1e-4 | ss10788 | G0:0016491 | 0.116 |
| sl10563 | G0:0044282 | <1e-4 | sl17078 | G0:0019637 | <1e-4 | ss11263 | G0:0031640 | <1e-4 | slr7097 | G0:0005575 | <1e-4 | ss12138 | G0:0016491 | 0.116 |
| sl17086 | G0:0048518 | <1e-4 | sl10997 | G0:0009161 | <1e-4 | sl11233 | G0:0022607 | <1e-4 | slr1614 | G0:0044446 | <1e-4 | slr0241 | G0:0016491 | 0.116 |
| sl11586 | G0:0019751 | <1e-4 | sl11613 | G0:0010468 | <1e-4 | slr1441 | G0:0006733 | <1e-4 | sl11071 | G0:0005575 | <1e-4 | sl15004 | G0:0016491 | 0.116 |
| sl10518 | G0:0051171 | <1e-4 | sl11232 | G0:0042180 | <1e-4 | sl11426 | G0:0001932 | <1e-4 | ssr3467 | G0:0005575 | <1e-4 | ss17038 | G0:0016491 | 0.116 |
| sl16054 | G0:0055114 | <1e-4 | ssr6003 | G0:0009057 | <1e-4 | ss16061 | G0:0010468 | <1e-4 | ssr1528 | G0:0043226 | <1e-4 | ssr3467 | G0:0016491 | 0.116 |
| slr0287 | G0:0009260 | <1e-4 | sl17031 | G0:0044283 | <1e-4 | sl10615 | G0:0006720 | <1e-4 | sl11542 | G0:0005575 | <1e-4 | slr0300 | G0:0016491 | 0.116 |
| slr1052 | G0:0071496 | <1e-4 | sl10867 | G0:0019222 | <1e-4 | slr0431 | G0:0016054 | <1e-4 | sl17030 | G0:0005575 | <1e-4 | slr5127 | G0:0016491 | 0.116 |

|          |            |       |         |            |       |         |            |       |         |            |       |          |            |        |
|----------|------------|-------|---------|------------|-------|---------|------------|-------|---------|------------|-------|----------|------------|--------|
| slr0356  | G0:0009059 | <1e-4 | sl10939 | G0:0044003 | <1e-4 | sl11835 | G0:0072527 | <1e-4 | slr0586 | G0:0044424 | <1e-4 | sl10736  | G0:0016491 | 0.116  |
| slr0356  | G0:0009991 | <1e-4 | slr0914 | G0:0010468 | <1e-4 | sl10595 | G0:0043648 | <1e-4 | ssr0657 | G0:0044464 | <1e-4 | slr2012  | G0:0016491 | 0.116  |
| ssl2245  | G0:0051179 | <1e-4 | sl10098 | G0:0071842 | <1e-4 | slr2111 | G0:0006732 | <1e-4 | ssr1552 | G0:0044464 | <1e-4 | slr0325  | G0:0016491 | 0.116  |
| slr1647  | G0:0051234 | <1e-4 | slr1484 | G0:0006163 | <1e-4 | slr0196 | G0:0044271 | <1e-4 | slr5024 | G0:0043226 | <1e-4 | slr0610  | G0:0016491 | 0.116  |
| sl10670  | G0:0072522 | <1e-4 | slr0184 | G0:0048519 | <1e-4 | slr1098 | G0:0031323 | <1e-4 | ssr2422 | G0:0044425 | <1e-4 | slr1915  | G0:0016491 | 0.116  |
| sl10871  | G0:0006631 | <1e-4 | sl11960 | G0:0043170 | <1e-4 | sl11240 | G0:0080090 | <1e-4 | sl11884 | G0:0005575 | <1e-4 | ssr1425  | G0:0016491 | 0.116  |
| sl10861  | G0:0009126 | <1e-4 | ssl1918 | G0:0048878 | <1e-4 | sl11571 | G0:0044283 | <1e-4 | slr2120 | G0:0005575 | <1e-4 | slr1394  | G0:0016491 | 0.116  |
| slr1505  | G0:0048522 | <1e-4 | sl11352 | G0:0009144 | <1e-4 | sl10811 | G0:0009161 | <1e-4 | sl11503 | G0:0044444 | <1e-4 | sl10525  | G0:0016491 | 0.116  |
| sl10659  | G0:0006732 | <1e-4 | slr0728 | G0:0046128 | <1e-4 | slr1179 | G0:0008150 | <1e-4 | ssr6048 | G0:0005575 | <1e-4 | ssl1300  | G0:0016491 | 0.116  |
| slr1288  | G0:0033013 | <1e-4 | ssl1464 | G0:0009263 | <1e-4 | slr1814 | G0:0009259 | <1e-4 | ssl3615 | G0:0044425 | <1e-4 | slr1327  | G0:0016491 | 0.116  |
| slr1677  | G0:0050794 | <1e-4 | sl11389 | G0:0010556 | <1e-4 | ssl5095 | G0:0052188 | <1e-4 | slr0049 | G0:0044444 | <1e-4 | slr1819  | G0:0016491 | 0.116  |
| ssl13451 | G0:0009132 | <1e-4 | slr8021 | G0:0022411 | <1e-4 | slr0588 | G0:0022411 | <1e-4 | slr1935 | G0:0044424 | <1e-4 | ssr6083  | G0:0016491 | 0.116  |
| sl15047  | G0:0044275 | <1e-4 | slr0770 | G0:0046394 | <1e-4 | slr5023 | G0:0009165 | <1e-4 | sl10447 | G0:0005575 | <1e-4 | sl10172  | G0:0016491 | 0.116  |
| slr1658  | G0:0080090 | <1e-4 | sl10447 | G0:0031326 | <1e-4 | slr0456 | G0:0072528 | <1e-4 | slr6080 | G0:0044425 | <1e-4 | sl10335  | G0:0016491 | 0.116  |
| ssr8013  | G0:0042455 | <1e-4 | slr0416 | G0:0071496 | <1e-4 | ssr6024 | G0:0019219 | <1e-4 | slr1353 | G0:0005575 | <1e-4 | sl11609  | G0:0016491 | 0.116  |
| ssl5031  | G0:0042180 | <1e-4 | slr1173 | G0:0022411 | <1e-4 | slr1429 | G0:0009308 | <1e-4 | sl11640 | G0:0044464 | <1e-4 | slr0270  | G0:0016491 | 0.116  |
| sl10060  | G0:0072524 | <1e-4 | slr1593 | G0:0051347 | <1e-4 | sl11315 | G0:0051186 | <1e-4 | slr0059 | G0:0044464 | <1e-4 | sl11052  | G0:0016491 | 0.116  |
| sl11222  | G0:0009141 | <1e-4 | slr1957 | G0:0006733 | <1e-4 | ssr3571 | G0:0051716 | <1e-4 | slr1789 | G0:0044444 | <1e-4 | ssr6030  | G0:0016491 | 0.116  |
| slr1306  | G0:0006163 | <1e-4 | sl15034 | G0:0009991 | <1e-4 | sl11162 | G0:0046394 | <1e-4 | sl17029 | G0:0044425 | <1e-4 | sl111714 | G0:0016491 | 0.116  |
| sl10024  | G0:0055114 | <1e-4 | slr0709 | G0:0006811 | <1e-4 | slr1047 | G0:0048518 | <1e-4 | sl11396 | G0:0044444 | <1e-4 | slr0334  | G0:0016491 | 0.116  |
| sl10423  | G0:0051246 | <1e-4 | sl10980 | G0:0006721 | <1e-4 | slr0519 | G0:0048878 | <1e-4 | slr7102 | G0:0044446 | <1e-4 | ssr1155  | G0:0016491 | 0.116  |
| ssr2711  | G0:0044275 | <1e-4 | sl11446 | G0:0009144 | <1e-4 | slr0362 | G0:0009987 | <1e-4 | slr1863 | G0:0043226 | <1e-4 | slr0582  | G0:0016491 | 0.116  |
| sl11307  | G0:0019752 | <1e-4 | slr1391 | G0:0055082 | <1e-4 | slr0695 | G0:0009165 | <1e-4 | sl11155 | G0:0044444 | <1e-4 | slr0184  | G0:0016491 | 0.116  |
| slr0065  | G0:0009056 | <1e-4 | slr6045 | G0:0009889 | <1e-4 | slr0751 | G0:0072522 | <1e-4 | sl15003 | G0:0044444 | <1e-4 | slr0238  | G0:0016491 | 0.116  |
| sl11527  | G0:0048878 | <1e-4 | sl10360 | G0:0009132 | <1e-4 | sl15006 | G0:0072528 | <1e-4 | sl10595 | G0:0044446 | <1e-4 | slr7094  | G0:0016491 | 0.116  |
| ssl3573  | G0:0009144 | <1e-4 | sl10749 | G0:0006732 | <1e-4 | sl11315 | G0:0051171 | <1e-4 | ssl5015 | G0:0044422 | <1e-4 | slr1235  | G0:0005215 | 0.114  |
| sl11634  | G0:0009893 | <1e-4 | slr0423 | G0:0009892 | <1e-4 | ssr2912 | G0:0050794 | <1e-4 | sl11265 | G0:0044444 | <1e-4 | ssl0294  | G0:0005215 | 0.114  |
| ssr6083  | G0:0050896 | <1e-4 | slr1886 | G0:0031326 | <1e-4 | slr1079 | G0:0080090 | <1e-4 | ssr0692 | G0:0044424 | <1e-4 | sl11527  | G0:0005215 | 0.114  |
| sl11476  | G0:0051188 | <1e-4 | slr1886 | G0:0009165 | <1e-4 | ssl8039 | G0:0043170 | <1e-4 | ssr2047 | G0:0043226 | <1e-4 | slr1266  | G0:0017111 | 0.1123 |
| slr1307  | G0:0009892 | <1e-4 | slr0145 | G0:0009132 | <1e-4 | slr1999 | G0:0009056 | <1e-4 | ssl1552 | G0:0044464 | <1e-4 | sl10198  | G0:0017111 | 0.1123 |
| sl10762  | G0:0019751 | <1e-4 | ssl3615 | G0:0019222 | <1e-4 | sl11092 | G0:0034641 | <1e-4 | sl10479 | G0:0044425 | <1e-4 | slr1437  | G0:0017111 | 0.1123 |
| slr1062  | G0:0006091 | <1e-4 | ssl1004 | G0:0043412 | <1e-4 | slr0937 | G0:0071496 | <1e-4 | slr5037 | G0:0044425 | <1e-4 | slr1593  | G0:0017111 | 0.1123 |
| sl10742  | G0:0065007 | <1e-4 | sl10793 | G0:0009199 | <1e-4 | slr0272 | G0:0050789 | <1e-4 | ssr1258 | G0:0005575 | <1e-4 | sl10381  | G0:0017111 | 0.1123 |
| slr0092  | G0:0050896 | <1e-4 | slr1926 | G0:0050801 | <1e-4 | slr0962 | G0:0051347 | <1e-4 | slr0271 | G0:0044446 | <1e-4 | slr1999  | G0:0017111 | 0.1123 |
| ssl5114  | G0:0080090 | <1e-4 | sl11884 | G0:0052188 | <1e-4 | sl11160 | G0:0009165 | <1e-4 | slr1240 | G0:0044446 | <1e-4 | slr1778  | G0:0017111 | 0.1123 |
| sl10803  | G0:0018130 | <1e-4 | sl10585 | G0:0006576 | <1e-4 | sl11191 | G0:0071841 | <1e-4 | sl11735 | G0:0044425 | <1e-4 | sl10185  | G0:0017111 | 0.1123 |
| slr6106  | G0:0052111 | <1e-4 | sl10630 | G0:0071841 | <1e-4 | slr6075 | G0:0019752 | <1e-4 | sl11873 | G0:0044464 | <1e-4 | sl11613  | G0:0017111 | 0.1123 |
| ssl3451  | G0:0043549 | <1e-4 | slr0887 | G0:0046483 | <1e-4 | ssr1768 | G0:0052111 | <1e-4 | sl10944 | G0:0043226 | <1e-4 | slr1571  | G0:0017111 | 0.1123 |
| slr0588  | G0:0009126 | <1e-4 | ssl7039 | G0:0009893 | <1e-4 | slr1767 | G0:0044003 | <1e-4 | slr1396 | G0:0005575 | <1e-4 | slr2122  | G0:0017111 | 0.1123 |
| sl10496  | G0:0006220 | <1e-4 | slr1570 | G0:0051186 | <1e-4 | sl11378 | G0:0050794 | <1e-4 | slr0273 | G0:0044424 | <1e-4 | sl11630  | G0:0017111 | 0.1123 |
| slr0059  | G0:0016054 | <1e-4 | sl11769 | G0:0071554 | <1e-4 | slr0360 | G0:0009991 | <1e-4 | sl10060 | G0:0043226 | <1e-4 | slr0103  | G0:0017111 | 0.1123 |
| slr2000  | G0:0016053 | <1e-4 | slr6007 | G0:0022607 | <1e-4 | sl11089 | G0:0090304 | <1e-4 | sl11656 | G0:0044446 | <1e-4 | slr1081  | G0:0017111 | 0.1123 |
| slr0407  | G0:0008150 | <1e-4 | slr1614 | G0:0009123 | <1e-4 | ssr6079 | G0:0016053 | <1e-4 | slr0586 | G0:0043226 | <1e-4 | sl10243  | G0:0017111 | 0.1123 |
| slr0305  | G0:0009126 | <1e-4 | sl10428 | G0:0042451 | <1e-4 | slr0725 | G0:0006631 | <1e-4 | ssl1707 | G0:0005575 | <1e-4 | slr0348  | G0:0017111 | 0.1123 |
| slr7101  | G0:0009132 | <1e-4 | slr1590 | G0:0046483 | <1e-4 | slr0318 | G0:0009893 | <1e-4 | sl11835 | G0:0043226 | <1e-4 | slr0913  | G0:0017111 | 0.1123 |
| slr1780  | G0:0008150 | <1e-4 | slr7010 | G0:0048878 | <1e-4 | sl10810 | G0:0009260 | <1e-4 | sl10441 | G0:0044425 | <1e-4 | sl10066  | G0:0017111 | 0.1123 |
| slr0607  | G0:0048519 | <1e-4 | sl10656 | G0:0072521 | <1e-4 | sl10294 | G0:0019752 | <1e-4 | slr2071 | G0:0044464 | <1e-4 | ssl2065  | G0:0017111 | 0.1123 |
| slr1571  | G0:0034654 | <1e-4 | sl10985 | G0:0016070 | <1e-4 | sl11658 | G0:0006720 | <1e-4 | slr2070 | G0:0044464 | <1e-4 | sl10944  | G0:0017111 | 0.1123 |
| sl10071  | G0:0009117 | <1e-4 | ssr7084 | G0:0044283 | <1e-4 | slr1101 | G0:0006082 | <1e-4 | sl11874 | G0:0043226 | <1e-4 | ssr2439  | G0:0017111 | 0.1123 |
| slr0199  | G0:0044275 | <1e-4 | slr0654 | G0:0019751 | <1e-4 | slr1951 | G0:0050801 | <1e-4 | ssl3549 | G0:0044425 | <1e-4 | slr1885  | G0:0017111 | 0.1123 |
| slr1964  | G0:0009991 | <1e-4 | sl11318 | G0:0051171 | <1e-4 | slr0337 | G0:0008150 | <1e-4 | sl10301 | G0:0044425 | <1e-4 | slr1573  | G0:0017111 | 0.1123 |
| slr0333  | G0:0009161 | <1e-4 | sl10596 | G0:0006066 | <1e-4 | slr0489 | G0:0048519 | <1e-4 | slr1773 | G0:0044422 | <1e-4 | slr1932  | G0:0017111 | 0.1123 |
| sl11884  | G0:0009987 | <1e-4 | slr6068 | G0:0071841 | <1e-4 | sl10860 | G0:0043436 | <1e-4 | slr5112 | G0:0044446 | <1e-4 | slr0770  | G0:0017111 | 0.1123 |
| slr7015  | G0:0009132 | <1e-4 | slr7016 | G0:0042180 | <1e-4 | slr1800 | G0:0034641 | <1e-4 | slr1437 | G0:0044424 | <1e-4 | ssr1765  | G0:0017111 | 0.1123 |

|         |            |       |          |            |       |         |            |       |         |            |       |         |            |        |
|---------|------------|-------|----------|------------|-------|---------|------------|-------|---------|------------|-------|---------|------------|--------|
| sl11164 | G0:0008610 | <1e-4 | sl17065  | G0:0006721 | <1e-4 | slr6015 | G0:0006066 | <1e-4 | slr0609 | G0:0044425 | <1e-4 | slr1964 | G0:0017111 | 0.1123 |
| slr0587 | G0:0051234 | <1e-4 | ssl2471  | G0:0046164 | <1e-4 | sl11785 | G0:0044255 | <1e-4 | sl10283 | G0:0044425 | <1e-4 | sl10524 | G0:0017111 | 0.1123 |
| slr6072 | G0:0055114 | <1e-4 | slr1599  | G0:0071841 | <1e-4 | sl11250 | G0:0019751 | <1e-4 | slr1926 | G0:0005575 | <1e-4 | sl10314 | G0:0017111 | 0.1123 |
| sl10867 | G0:0046394 | <1e-4 | slr1444  | G0:0043412 | <1e-4 | sl15032 | G0:0051179 | <1e-4 | ssl0242 | G0:0044464 | <1e-4 | slr0006 | G0:0017111 | 0.1123 |
| sl10639 | G0:0009199 | <1e-4 | slr0655  | G0:0006066 | <1e-4 | slr0852 | G0:0072524 | <1e-4 | slr6057 | G0:0044422 | <1e-4 | sl10325 | G0:0017111 | 0.1123 |
| sl10588 | G0:0072521 | <1e-4 | ssr0335  | G0:0005996 | <1e-4 | sl18001 | G0:0019752 | <1e-4 | slr8044 | G0:0044424 | <1e-4 | ssr3571 | G0:0017111 | 0.1123 |
| sl11307 | G0:0006082 | <1e-4 | ssl1918  | G0:0006733 | <1e-4 | sl11049 | G0:0019637 | <1e-4 | slr7057 | G0:0005575 | <1e-4 | slr0192 | G0:0017111 | 0.1123 |
| slr7071 | G0:0009892 | <1e-4 | sl11726  | G0:0019751 | <1e-4 | sl11071 | G0:0009126 | <1e-4 | sl11921 | G0:0005575 | <1e-4 | slr1854 | G0:0017111 | 0.1123 |
| sl11273 | G0:0006220 | <1e-4 | slr1927  | G0:0042451 | <1e-4 | slr1813 | G0:0009893 | <1e-4 | slr0053 | G0:0005575 | <1e-4 | slr1084 | G0:0017111 | 0.1123 |
| sl11722 | G0:0008610 | <1e-4 | ssr1407  | G0:0019219 | <1e-4 | sl11040 | G0:0009142 | <1e-4 | ssl1377 | G0:0044464 | <1e-4 | sl10216 | G0:0017111 | 0.1123 |
| sl11054 | G0:0019222 | <1e-4 | sl110524 | G0:0031323 | <1e-4 | sl10007 | G0:0051171 | <1e-4 | ssl7042 | G0:0043226 | <1e-4 | slr1648 | G0:0017111 | 0.1123 |
| sl11123 | G0:0051818 | <1e-4 | slr1970  | G0:0072524 | <1e-4 | sl15026 | G0:0051818 | <1e-4 | ssl3379 | G0:0044422 | <1e-4 | slr0872 | G0:0017111 | 0.1123 |
| slr1812 | G0:0072522 | <1e-4 | ssr7036  | G0:0044283 | <1e-4 | slr1069 | G0:0006811 | <1e-4 | sl10253 | G0:0044444 | <1e-4 | sl10756 | G0:0017111 | 0.1123 |
| sl11158 | G0:0006163 | <1e-4 | slr0816  | G0:0043549 | <1e-4 | ssr6019 | G0:0048878 | <1e-4 | ssr2711 | G0:0005575 | <1e-4 | slr1788 | G0:0017111 | 0.1123 |
| slr0326 | G0:0042451 | <1e-4 | sl10735  | G0:0051186 | <1e-4 | sl10445 | G0:0072528 | <1e-4 | ssr2962 | G0:0005575 | <1e-4 | sl11442 | G0:0017111 | 0.1123 |
| slr0249 | G0:0071554 | <1e-4 | slr1970  | G0:0006811 | <1e-4 | ssl0788 | G0:0006793 | <1e-4 | sl11541 | G0:0044446 | <1e-4 | slr0023 | G0:0017111 | 0.1123 |
| slr1450 | G0:0055114 | <1e-4 | slr1215  | G0:0009262 | <1e-4 | sl11832 | G0:0022411 | <1e-4 | slr0304 | G0:0044424 | <1e-4 | slr0392 | G0:0017111 | 0.1123 |
| sl11201 | G0:0044248 | <1e-4 | ssr1407  | G0:0006811 | <1e-4 | slr6103 | G0:0009117 | <1e-4 | sl11372 | G0:0044444 | <1e-4 | slr1177 | G0:0017111 | 0.1123 |
| slr5024 | G0:0072528 | <1e-4 | sl11021  | G0:0043412 | <1e-4 | slr7015 | G0:0010468 | <1e-4 | slr1189 | G0:0044424 | <1e-4 | sl11563 | G0:0017111 | 0.1123 |
| slr0730 | G0:0009123 | <1e-4 | sl11401  | G0:0051188 | <1e-4 | slr1616 | G0:0009117 | <1e-4 | sl10095 | G0:0044424 | <1e-4 | sl10280 | G0:0017111 | 0.1123 |
| slr6028 | G0:0052188 | <1e-4 | sl11531  | G0:0006811 | <1e-4 | slr1047 | G0:0050789 | <1e-4 | slr1050 | G0:0044422 | <1e-4 | slr1880 | G0:0017111 | 0.1123 |
| slr0645 | G0:0009056 | <1e-4 | sl10765  | G0:0071840 | <1e-4 | ssr3402 | G0:0048522 | <1e-4 | slr0907 | G0:0044464 | <1e-4 | sl11315 | G0:0017111 | 0.1123 |
| slr0751 | G0:0031640 | <1e-4 | slr0049  | G0:0046128 | <1e-4 | slr0725 | G0:0006720 | <1e-4 | sl11505 | G0:0044444 | <1e-4 | ssr3122 | G0:0017111 | 0.1123 |
| sl11174 | G0:0055114 | <1e-4 | slr1116  | G0:0006766 | <1e-4 | sl11273 | G0:0071841 | <1e-4 | sl10225 | G0:0044424 | <1e-4 | slr1638 | G0:0017111 | 0.1123 |
| ssr2201 | G0:0009262 | <1e-4 | sl10615  | G0:0006766 | <1e-4 | slr1023 | G0:0009056 | <1e-4 | sl17075 | G0:0044424 | <1e-4 | sl10532 | G0:0017111 | 0.1123 |
| slr2092 | G0:0006793 | <1e-4 | sl11702  | G0:0001932 | <1e-4 | ssl5099 | G0:0008150 | <1e-4 | sl11380 | G0:0044425 | <1e-4 | slr0431 | G0:0017111 | 0.1123 |
| sl10749 | G0:0043549 | <1e-4 | ssr3189  | G0:0072521 | <1e-4 | slr1276 | G0:0044283 | <1e-4 | slr5017 | G0:0005575 | <1e-4 | ssr2755 | G0:0017111 | 0.1123 |
| sl10060 | G0:0008610 | <1e-4 | slr0453  | G0:0009126 | <1e-4 | ssl3573 | G0:0009161 | <1e-4 | ssr0335 | G0:0043226 | <1e-4 | sl11002 | G0:0017111 | 0.1123 |
| slr0937 | G0:0048522 | <1e-4 | slr2120  | G0:0072521 | <1e-4 | sl10449 | G0:0001932 | <1e-4 | sl15089 | G0:0044464 | <1e-4 | sl10456 | G0:0017111 | 0.1123 |
| ssr6086 | G0:0060255 | <1e-4 | sl18040  | G0:0044248 | <1e-4 | sl10298 | G0:0051186 | <1e-4 | slr1915 | G0:0005575 | <1e-4 | slr1275 | G0:0017111 | 0.1123 |
| sl11186 | G0:0009124 | <1e-4 | ssl3291  | G0:0042180 | <1e-4 | sl17055 | G0:0006631 | <1e-4 | sl15062 | G0:0044444 | <1e-4 | slr2121 | G0:0017111 | 0.1123 |
| slr0333 | G0:0044248 | <1e-4 | sl11735  | G0:0050794 | <1e-4 | slr1670 | G0:0072528 | <1e-4 | sl10630 | G0:0044446 | <1e-4 | slr1676 | G0:0017111 | 0.1123 |
| sl10775 | G0:0042180 | <1e-4 | slr1391  | G0:0051188 | <1e-4 | slr1194 | G0:0051186 | <1e-4 | slr6049 | G0:0044425 | <1e-4 | sl11262 | G0:0017111 | 0.1123 |
| slr0680 | G0:0044106 | <1e-4 | ssl0350  | G0:0071841 | <1e-4 | slr2000 | G0:0019222 | <1e-4 | sl11562 | G0:0044444 | <1e-4 | slr0519 | G0:0017111 | 0.1123 |
| sl10282 | G0:0051347 | <1e-4 | sl10265  | G0:0016054 | <1e-4 | slr6073 | G0:0072521 | <1e-4 | slr1470 | G0:0005575 | <1e-4 | slr0404 | G0:0017111 | 0.1123 |
| sl10072 | G0:0006720 | <1e-4 | slr2005  | G0:0046394 | <1e-4 | slr1240 | G0:0006721 | <1e-4 | sl10623 | G0:0005575 | <1e-4 | ssr2615 | G0:0017111 | 0.1123 |
| slr1557 | G0:0009263 | <1e-4 | ssr7084  | G0:0051347 | <1e-4 | sl10857 | G0:0043549 | <1e-4 | sl11378 | G0:0005575 | <1e-4 | sl10355 | G0:0017111 | 0.1123 |
| ssr1768 | G0:0006766 | <1e-4 | slr1773  | G0:0008150 | <1e-4 | sl11151 | G0:0065007 | <1e-4 | slr0976 | G0:0044422 | <1e-4 | sl10085 | G0:0017111 | 0.1123 |
| sl10436 | G0:0009259 | <1e-4 | slr1240  | G0:0022411 | <1e-4 | slr2103 | G0:0080090 | <1e-4 | slr2144 | G0:0044444 | <1e-4 | slr1262 | G0:0017111 | 0.1123 |
| sl15033 | G0:0009394 | <1e-4 | sl11054  | G0:0009260 | <1e-4 | slr2038 | G0:0006576 | <1e-4 | sl10779 | G0:0044425 | <1e-4 | sl10414 | G0:0017111 | 0.1123 |
| slr0291 | G0:0046164 | <1e-4 | sl11696  | G0:0050794 | <1e-4 | slr5016 | G0:0043648 | <1e-4 | sl11752 | G0:0005575 | <1e-4 | slr7023 | G0:0003676 | 0.112  |
| sl10793 | G0:0080090 | <1e-4 | slr0498  | G0:0048878 | <1e-4 | sl11504 | G0:0051716 | <1e-4 | sl10298 | G0:0005575 | <1e-4 | sl10611 | G0:0003676 | 0.112  |
| sl11254 | G0:0006793 | <1e-4 | sl10503  | G0:0043436 | <1e-4 | slr0514 | G0:0046907 | <1e-4 | slr1913 | G0:0005575 | <1e-4 | sl11414 | G0:0003676 | 0.112  |
| slr0147 | G0:0018130 | <1e-4 | sl11552  | G0:0052111 | <1e-4 | sl11715 | G0:0065007 | <1e-4 | slr6051 | G0:0043226 | <1e-4 | sl11773 | G0:0003676 | 0.112  |
| slr0863 | G0:0071496 | <1e-4 | slr1168  | G0:0009991 | <1e-4 | slr6008 | G0:0009059 | <1e-4 | slr2004 | G0:0044464 | <1e-4 | slr6005 | G0:0003676 | 0.112  |
| slr1885 | G0:0009057 | <1e-4 | ssl0750  | G0:0046394 | <1e-4 | slr0551 | G0:0044248 | <1e-4 | slr1970 | G0:0005575 | <1e-4 | sl11401 | G0:0003676 | 0.112  |
| sl11476 | G0:0071841 | <1e-4 | ssr6020  | G0:0072528 | <1e-4 | slr6071 | G0:0051347 | <1e-4 | slr1117 | G0:0043226 | <1e-4 | sl10498 | G0:0003676 | 0.112  |
| sl18032 | G0:0019222 | <1e-4 | slr1288  | G0:0016052 | <1e-4 | ssr3129 | G0:0050801 | <1e-4 | slr1519 | G0:0044424 | <1e-4 | sl10761 | G0:0003676 | 0.112  |
| sl17077 | G0:0042451 | <1e-4 | sl10446  | G0:0006793 | <1e-4 | ssr1375 | G0:0044003 | <1e-4 | slr1376 | G0:0043226 | <1e-4 | ssr1766 | G0:0003676 | 0.112  |
| slr0521 | G0:0072524 | <1e-4 | sl11714  | G0:0072524 | <1e-4 | sl10149 | G0:0051171 | <1e-4 | slr1276 | G0:0005575 | <1e-4 | slr1600 | G0:0003676 | 0.112  |
| slr5012 | G0:0048523 | <1e-4 | slr1573  | G0:0010468 | <1e-4 | slr7081 | G0:0044255 | <1e-4 | sl10479 | G0:0005575 | <1e-4 | slr1472 | G0:0003676 | 0.112  |
| slr0108 | G0:0019219 | <1e-4 | sl11399  | G0:0022411 | <1e-4 | slr6029 | G0:0005996 | <1e-4 | ssr2333 | G0:0044424 | <1e-4 | slr7081 | G0:0003676 | 0.112  |
| sl10743 | G0:0009126 | <1e-4 | sl10639  | G0:0034641 | <1e-4 | slr1613 | G0:0050896 | <1e-4 | ssl3829 | G0:0043226 | <1e-4 | slr1956 | G0:0003676 | 0.112  |
| slr0243 | G0:0019637 | <1e-4 | slr0291  | G0:0051179 | <1e-4 | sl10996 | G0:0050896 | <1e-4 | slr1599 | G0:0005575 | <1e-4 | sl15130 | G0:0003676 | 0.112  |

|         |            |       |          |            |       |         |            |       |         |            |       |         |            |       |
|---------|------------|-------|----------|------------|-------|---------|------------|-------|---------|------------|-------|---------|------------|-------|
| sl10743 | G0:0034654 | <1e-4 | ssr3129  | G0:0006721 | <1e-4 | sl11272 | G0:0051234 | <1e-4 | slr1847 | G0:0044422 | <1e-4 | ssr6046 | G0:0003676 | 0.112 |
| slr1896 | G0:0006091 | <1e-4 | slr1127  | G0:0009263 | <1e-4 | sl10577 | G0:0009141 | <1e-4 | sl10909 | G0:0044424 | <1e-4 | sl10218 | G0:0003676 | 0.112 |
| slr1376 | G0:0019637 | <1e-4 | sl110588 | G0:0019637 | <1e-4 | slr1590 | G0:0042180 | <1e-4 | slr6074 | G0:0044422 | <1e-4 | ssr6032 | G0:0003676 | 0.112 |
| sl10350 | G0:0019752 | <1e-4 | slr1900  | G0:0042180 | <1e-4 | sl15130 | G0:0009141 | <1e-4 | ss18003 | G0:0044446 | <1e-4 | slr1187 | G0:0003676 | 0.112 |
| sl11528 | G0:0071840 | <1e-4 | sl10249  | G0:0060255 | <1e-4 | sl11541 | G0:0044248 | <1e-4 | slr8021 | G0:0044422 | <1e-4 | slr7101 | G0:0003676 | 0.112 |
| sl11775 | G0:0010556 | <1e-4 | ss18028  | G0:0009165 | <1e-4 | slr1572 | G0:0043648 | <1e-4 | slr0812 | G0:0044444 | <1e-4 | sl11961 | G0:0003676 | 0.112 |
| sl15062 | G0:0043648 | <1e-4 | slr1384  | G0:0006066 | <1e-4 | slr6039 | G0:0046164 | <1e-4 | slr1378 | G0:0043226 | <1e-4 | sl11004 | G0:0003676 | 0.112 |
| ssr2439 | G0:0006811 | <1e-4 | slr0876  | G0:0009987 | <1e-4 | slr1179 | G0:0006066 | <1e-4 | sl11250 | G0:0044444 | <1e-4 | slr0195 | G0:0003676 | 0.112 |
| slr7026 | G0:0009117 | <1e-4 | sl11773  | G0:0044003 | <1e-4 | sl11863 | G0:0071496 | <1e-4 | sl11504 | G0:0005575 | <1e-4 | slr5023 | G0:0003676 | 0.112 |
| slr1690 | G0:0019752 | <1e-4 | sl10335  | G0:0034654 | <1e-4 | slr2049 | G0:0051179 | <1e-4 | slr1789 | G0:0005575 | <1e-4 | sl11766 | G0:0003676 | 0.112 |
| slr5073 | G0:0090304 | <1e-4 | ssr5092  | G0:0046907 | <1e-4 | sl10175 | G0:0072522 | <1e-4 | sl10355 | G0:0044446 | <1e-4 | slr0769 | G0:0003676 | 0.112 |
| slr0039 | G0:0009987 | <1e-4 | slr0765  | G0:0009262 | <1e-4 | slr0924 | G0:0009263 | <1e-4 | sl11601 | G0:0005575 | <1e-4 | sl11757 | G0:0003676 | 0.112 |
| sl10588 | G0:0006091 | <1e-4 | slr0241  | G0:0009117 | <1e-4 | sl10863 | G0:0009144 | <1e-4 | slr1507 | G0:0044422 | <1e-4 | sl10872 | G0:0003676 | 0.112 |
| slr1768 | G0:0006811 | <1e-4 | slr6090  | G0:0051246 | <1e-4 | sl11942 | G0:0051188 | <1e-4 | ssr1552 | G0:0005575 | <1e-4 | sl17063 | G0:0003676 | 0.112 |
| slr0742 | G0:0008150 | <1e-4 | slr1896  | G0:0009199 | <1e-4 | ssr3129 | G0:0044271 | <1e-4 | sl11764 | G0:0044446 | <1e-4 | slr0869 | G0:0003676 | 0.112 |
| slr1852 | G0:0046128 | <1e-4 | slr1999  | G0:0051186 | <1e-4 | sl11447 | G0:0016054 | <1e-4 | slr1807 | G0:0044425 | <1e-4 | sl10913 | G0:0003676 | 0.112 |
| slr0815 | G0:0006732 | <1e-4 | sl11882  | G0:0006766 | <1e-4 | sl10558 | G0:0042455 | <1e-4 | slr7091 | G0:0044446 | <1e-4 | ss11972 | G0:0003676 | 0.112 |
| sl10886 | G0:0009141 | <1e-4 | sl10325  | G0:0043412 | <1e-4 | sl11217 | G0:0006732 | <1e-4 | sl11949 | G0:0044464 | <1e-4 | sl11348 | G0:0003676 | 0.112 |
| slr1813 | G0:0052111 | <1e-4 | sl11858  | G0:0044282 | <1e-4 | slr1768 | G0:0034654 | <1e-4 | ssr3572 | G0:0005575 | <1e-4 | slr6090 | G0:0003676 | 0.112 |
| sl15004 | G0:0031323 | <1e-4 | sl10691  | G0:0044248 | <1e-4 | sl10676 | G0:0052111 | <1e-4 | sl11121 | G0:0043226 | <1e-4 | slr0146 | G0:0003676 | 0.112 |
| slr1638 | G0:0006811 | <1e-4 | sl10072  | G0:0006766 | <1e-4 | slr0325 | G0:0051716 | <1e-4 | slr6087 | G0:0044422 | <1e-4 | slr6014 | G0:0003676 | 0.112 |
| slr0407 | G0:0006811 | <1e-4 | ss18028  | G0:0072524 | <1e-4 | slr1178 | G0:0006733 | <1e-4 | sl15090 | G0:0044464 | <1e-4 | ss12781 | G0:0003676 | 0.112 |
| sl11173 | G0:0051171 | <1e-4 | slr0545  | G0:0016052 | <1e-4 | slr0740 | G0:0019752 | <1e-4 | slr1261 | G0:0044425 | <1e-4 | sl15062 | G0:0003676 | 0.112 |
| slr1670 | G0:0009259 | <1e-4 | slr0554  | G0:0044281 | <1e-4 | slr5021 | G0:0051171 | <1e-4 | slr1273 | G0:0043226 | <1e-4 | sl12013 | G0:0003676 | 0.112 |
| sl10749 | G0:0044281 | <1e-4 | slr1117  | G0:0009309 | <1e-4 | slr0398 | G0:0051716 | <1e-4 | sl10044 | G0:0044424 | <1e-4 | sl10811 | G0:0003676 | 0.112 |
| sl11252 | G0:0048518 | <1e-4 | sl11766  | G0:0051188 | <1e-4 | sl11411 | G0:0072522 | <1e-4 | slr1914 | G0:0005575 | <1e-4 | sl11906 | G0:0003676 | 0.112 |
| sl10482 | G0:0016053 | <1e-4 | slr0919  | G0:0046483 | <1e-4 | slr2103 | G0:0072522 | <1e-4 | slr1188 | G0:0044444 | <1e-4 | slr1261 | G0:0003676 | 0.112 |
| slr7102 | G0:0019637 | <1e-4 | ss12807  | G0:0019222 | <1e-4 | slr1911 | G0:0048519 | <1e-4 | ssr1114 | G0:0044464 | <1e-4 | slr0333 | G0:0003676 | 0.112 |
| slr1437 | G0:0044282 | <1e-4 | ssr1114  | G0:0016053 | <1e-4 | slr1262 | G0:0006091 | <1e-4 | sl10703 | G0:0044464 | <1e-4 | slr6074 | G0:0003676 | 0.112 |
| ssr1765 | G0:0051246 | <1e-4 | slr1188  | G0:0006631 | <1e-4 | slr6090 | G0:0044271 | <1e-4 | sl11505 | G0:0005575 | <1e-4 | sl10282 | G0:0003676 | 0.112 |
| slr0456 | G0:0009259 | <1e-4 | slr5111  | G0:0009259 | <1e-4 | slr5012 | G0:0051234 | <1e-4 | slr1914 | G0:0044422 | <1e-4 | slr1547 | G0:0003676 | 0.112 |
| slr0959 | G0:0006163 | <1e-4 | sl10488  | G0:0080090 | <1e-4 | slr0948 | G0:0006753 | <1e-4 | slr1866 | G0:0044446 | <1e-4 | slr0751 | G0:0003676 | 0.112 |
| sl10688 | G0:0006811 | <1e-4 | slr1670  | G0:0006721 | <1e-4 | sm10011 | G0:0016052 | <1e-4 | slr1998 | G0:0043226 | <1e-4 | ss10312 | G0:0003676 | 0.112 |
| slr0596 | G0:0033013 | <1e-4 | sl11915  | G0:0016054 | <1e-4 | slr0249 | G0:0044255 | <1e-4 | sl11698 | G0:0044446 | <1e-4 | slr1218 | G0:0003676 | 0.112 |
| sl11203 | G0:0009124 | <1e-4 | slr0680  | G0:0019222 | <1e-4 | slr0852 | G0:0080090 | <1e-4 | sl17067 | G0:0043226 | <1e-4 | sl10048 | G0:0003676 | 0.112 |
| sl10047 | G0:0006163 | <1e-4 | sl10325  | G0:0034641 | <1e-4 | sl10428 | G0:0009889 | <1e-4 | slr1069 | G0:0044464 | <1e-4 | sl15061 | G0:0003676 | 0.112 |
| slr2070 | G0:0048522 | <1e-4 | sl11954  | G0:0044282 | <1e-4 | slr1636 | G0:0044248 | <1e-4 | ss13829 | G0:0005575 | <1e-4 | sl11921 | G0:0003676 | 0.112 |
| sl10263 | G0:0044255 | <1e-4 | ssr1528  | G0:0009059 | <1e-4 | slr0305 | G0:0009123 | <1e-4 | slr6072 | G0:0044444 | <1e-4 | sl11764 | G0:0003676 | 0.112 |
| sl11021 | G0:0034654 | <1e-4 | slr1183  | G0:0034654 | <1e-4 | sl11757 | G0:0031640 | <1e-4 | ssr5121 | G0:0043226 | <1e-4 | slr0058 | G0:0003676 | 0.112 |
| sl10319 | G0:0009117 | <1e-4 | slr2038  | G0:0009309 | <1e-4 | slr1415 | G0:0009126 | <1e-4 | sl10444 | G0:0044444 | <1e-4 | ss15129 | G0:0003676 | 0.112 |
| ss10294 | G0:0009123 | <1e-4 | sl10263  | G0:0071496 | <1e-4 | slr1767 | G0:0042455 | <1e-4 | sl11272 | G0:0005575 | <1e-4 | sl18033 | G0:0003676 | 0.112 |
| sl10445 | G0:0071842 | <1e-4 | slr0941  | G0:0009991 | <1e-4 | ss12471 | G0:0009141 | <1e-4 | sl10301 | G0:0043226 | <1e-4 | sl11939 | G0:0003676 | 0.112 |
| sl11671 | G0:0043436 | <1e-4 | sl11109  | G0:0072521 | <1e-4 | slr0989 | G0:0051716 | <1e-4 | ssr3572 | G0:0044424 | <1e-4 | sl11696 | G0:0003676 | 0.112 |
| slr0964 | G0:0006576 | <1e-4 | sl10172  | G0:0009056 | <1e-4 | sl11469 | G0:0009057 | <1e-4 | sl11006 | G0:0044424 | <1e-4 | slr5018 | G0:0003676 | 0.112 |
| sl11472 | G0:0072522 | <1e-4 | slr1052  | G0:0080090 | <1e-4 | slr1814 | G0:0006720 | <1e-4 | sl17063 | G0:0044446 | <1e-4 | slr1095 | G0:0003676 | 0.112 |
| slr0613 | G0:0051818 | <1e-4 | slr0784  | G0:0048878 | <1e-4 | sl10068 | G0:0009309 | <1e-4 | slr1507 | G0:0005575 | <1e-4 | slr0362 | G0:0003676 | 0.112 |
| slr0818 | G0:0034660 | <1e-4 | ssr6030  | G0:0016053 | <1e-4 | slr7013 | G0:0006082 | <1e-4 | sl10382 | G0:0043226 | <1e-4 | ssr2611 | G0:0003676 | 0.112 |
| sl17033 | G0:0042451 | <1e-4 | slr0104  | G0:0006631 | <1e-4 | slr1648 | G0:0042180 | <1e-4 | slr0482 | G0:0043226 | <1e-4 | slr0971 | G0:0003676 | 0.112 |
| slr1353 | G0:0009893 | <1e-4 | sl11318  | G0:0051186 | <1e-4 | sl10281 | G0:0046483 | <1e-4 | slr0181 | G0:0044444 | <1e-4 | slr1907 | G0:0003676 | 0.112 |
| slr1128 | G0:0010556 | <1e-4 | sl10857  | G0:0055086 | <1e-4 | sl10103 | G0:0072524 | <1e-4 | sl10597 | G0:0005575 | <1e-4 | slr6072 | G0:0003676 | 0.112 |
| slr1081 | G0:0009893 | <1e-4 | slr5101  | G0:0006082 | <1e-4 | slr0169 | G0:0009262 | <1e-4 | sl10590 | G0:0044464 | <1e-4 | ss13383 | G0:0003676 | 0.112 |
| sl10382 | G0:0071841 | <1e-4 | sl11049  | G0:0006753 | <1e-4 | slr2048 | G0:0071842 | <1e-4 | ssr2554 | G0:0044425 | <1e-4 | ss11004 | G0:0003676 | 0.112 |
| slr5118 | G0:0044248 | <1e-4 | slr0810  | G0:0051246 | <1e-4 | slr1702 | G0:0009142 | <1e-4 | slr0146 | G0:0044422 | <1e-4 | slr1102 | G0:0003676 | 0.112 |
| slr0609 | G0:0009141 | <1e-4 | sl11495  | G0:0009124 | <1e-4 | slr1464 | G0:0009165 | <1e-4 | slr0581 | G0:0044464 | <1e-4 | sl15044 | G0:0003676 | 0.112 |

ss12749 G0:0044003 <1e-4 slr0145 G0:0009991 <1e-4 slr6065 G0:0006721 <1e-4 sl10397 G0:0043226 <1e-4 slr6008 G0:0003676 0.112  
sl10563 G0:0045184 <1e-4 ssl2148 G0:0051234 <1e-4 slr1062 G0:0043648 <1e-4 slr1647 G0:0044444 <1e-4 slr6006 G0:0003676 0.112  
sl10910 G0:0043170 <1e-4 slr0589 G0:0009262 <1e-4 sl11570 G0:0009991 <1e-4 slr6051 G0:0044446 <1e-4 ss12009 G0:0003676 0.112  
slr0554 G0:0050896 <1e-4 slr0602 G0:0009987 <1e-4 slr1644 G0:0080090 <1e-4 ss17042 G0:0044424 <1e-4 sssr0335 G0:0003676 0.112  
sl10577 G0:0043412 <1e-4 slr1384 G0:0006811 <1e-4 slr0587 G0:0051246 <1e-4 slr1429 G0:0044422 <1e-4 ss11417 G0:0003676 0.112  
sl10839 G0:0001932 <1e-4 slr0456 G0:0006091 <1e-4 sssr2318 G0:0051234 <1e-4 sl10839 G0:0005575 <1e-4 slr6013 G0:0003676 0.112  
slr0065 G0:0006733 <1e-4 sl11054 G0:0034654 <1e-4 slr0907 G0:0008610 <1e-4 slr0299 G0:0044444 <1e-4 slr0695 G0:0003676 0.112  
slr0980 G0:0006793 <1e-4 sl10863 G0:0046394 <1e-4 slr0272 G0:0006811 <1e-4 ss15100 G0:0005575 <1e-4 slr6021 G0:0003676 0.112  
slr1752 G0:0051171 <1e-4 slr8014 G0:0009056 <1e-4 slr1069 G0:0048878 <1e-4 sl10060 G0:0044446 <1e-4 sl15090 G0:0003676 0.112  
ssr1258 G0:0043933 <1e-4 slr1178 G0:0044282 <1e-4 sl10630 G0:0008610 <1e-4 ss17045 G0:0005575 <1e-4 sl16054 G0:0003676 0.112  
ssr6002 G0:0051818 <1e-4 slr0341 G0:0019362 <1e-4 slr1790 G0:0050801 <1e-4 slr1885 G0:0044424 <1e-4 ss12148 G0:0003676 0.112  
sl11613 G0:0009117 <1e-4 sl11119 G0:0031323 <1e-4 slr1599 G0:0008150 <1e-4 slr2038 G0:0044424 <1e-4 slr1179 G0:0003676 0.112  
slr0263 G0:0043933 <1e-4 slr2018 G0:0009161 <1e-4 sl10355 G0:0044271 <1e-4 sl10010 G0:0044425 <1e-4 slr0959 G0:0003676 0.112  
slr6072 G0:0009161 <1e-4 sl10361 G0:0044283 <1e-4 slr7060 G0:0022411 <1e-4 sl11461 G0:0044425 <1e-4 sl10630 G0:0003676 0.112  
slr1547 G0:0046128 <1e-4 slr2144 G0:0052188 <1e-4 sl11702 G0:0009144 <1e-4 sl10010 G0:0043226 <1e-4 sl10867 G0:0003676 0.112  
slr6007 G0:0006576 <1e-4 slr0521 G0:0009056 <1e-4 slr1098 G0:0051818 <1e-4 sl11681 G0:0044425 <1e-4 slr1378 G0:0003676 0.112  
slr1383 G0:0031326 <1e-4 sssr3571 G0:0009394 <1e-4 sssr2611 G0:0022411 <1e-4 slr0060 G0:0044444 <1e-4 slr0355 G0:0003676 0.112  
ss10832 G0:0080090 <1e-4 sl10444 G0:0009892 <1e-4 sl10925 G0:0043648 <1e-4 sl11218 G0:0044425 <1e-4 slr1273 G0:0003676 0.112  
ss15113 G0:0042455 <1e-4 slr1788 G0:0019751 <1e-4 slr0423 G0:0071496 <1e-4 sl10175 G0:0044424 <1e-4 sl11092 G0:0003676 0.112  
sl11736 G0:0071842 <1e-4 sl11272 G0:0044255 <1e-4 sl11241 G0:0009057 <1e-4 slr0711 G0:0044424 <1e-4 ss18003 G0:0003676 0.112  
slr0870 G0:0046483 <1e-4 slr1052 G0:0009123 <1e-4 sl11531 G0:0043412 <1e-4 sl10216 G0:0044425 <1e-4 sssr3304 G0:0003676 0.112  
sl10372 G0:0080090 <1e-4 sl10397 G0:0065007 <1e-4 sl11106 G0:0065007 <1e-4 slr0575 G0:0005575 <1e-4 slr1464 G0:0003676 0.112  
slr0634 G0:0090304 <1e-4 sl11495 G0:0009142 <1e-4 slr0821 G0:0033013 <1e-4 slr1188 G0:0043226 <1e-4 slr7011 G0:0003676 0.112  
ss15099 G0:0043933 <1e-4 slr2120 G0:0055082 <1e-4 sssr3571 G0:0019219 <1e-4 slr0575 G0:0044425 <1e-4 sl11797 G0:0003676 0.112  
slr1169 G0:0043933 <1e-4 sl11446 G0:0006163 <1e-4 sl11086 G0:0006811 <1e-4 sl11106 G0:0044446 <1e-4 slr0380 G0:0003676 0.112  
sl11186 G0:0016052 <1e-4 sl10103 G0:0048519 <1e-4 ss12420 G0:0048522 <1e-4 slr1470 G0:0044422 <1e-4 slr0151 G0:0003676 0.112  
slr1603 G0:0045184 <1e-4 slr1699 G0:0016054 <1e-4 slr0103 G0:0009056 <1e-4 sl11252 G0:0005575 <1e-4 sl18002 G0:0003676 0.112  
ssr6020 G0:0019362 <1e-4 slr6066 G0:0009124 <1e-4 ss18005 G0:0050794 <1e-4 slr2060 G0:0044444 <1e-4 slr7096 G0:0003676 0.112  
slr6015 G0:0009056 <1e-4 slr1107 G0:0055082 <1e-4 slr0913 G0:0034641 <1e-4 sl10847 G0:0044444 <1e-4 sl11769 G0:0003676 0.112  
sl10858 G0:0009308 <1e-4 sssl7021 G0:0051716 <1e-4 sl11654 G0:0043648 <1e-4 ss15095 G0:0044446 <1e-4 sl11783 G0:0003676 0.112  
ssr6019 G0:0019637 <1e-4 slr0935 G0:0009150 <1e-4 sssr1041 G0:0046483 <1e-4 sl10189 G0:0005575 <1e-4 sl11510 G0:0003676 0.112  
slr1541 G0:0031323 <1e-4 sl10736 G0:0009987 <1e-4 slr6031 G0:0006732 <1e-4 sl10939 G0:0043226 <1e-4 slr1660 G0:0003676 0.112  
sl10162 G0:0006082 <1e-4 slr1623 G0:0072521 <1e-4 slr1628 G0:0006753 <1e-4 sl11315 G0:0044446 <1e-4 slr1116 G0:0003676 0.112  
sl11219 G0:0051716 <1e-4 slr0104 G0:0046394 <1e-4 sl10283 G0:0006732 <1e-4 sl10005 G0:0044422 <1e-4 slr0619 G0:0003676 0.112  
sl10630 G0:0043549 <1e-4 slr0957 G0:0019222 <1e-4 sl11380 G0:0034654 <1e-4 slr0863 G0:0044446 <1e-4 slr6063 G0:0003676 0.112  
sl10783 G0:0034654 <1e-4 slr0980 G0:0006753 <1e-4 sl11424 G0:0018130 <1e-4 sl10172 G0:0005575 <1e-4 slr1611 G0:0003676 0.112  
sl11714 G0:0046128 <1e-4 slr5021 G0:0006082 <1e-4 sl11272 G0:0009124 <1e-4 sl11769 G0:0044446 <1e-4 slr0305 G0:0016787 0.1112  
sl17063 G0:0051186 <1e-4 sl10449 G0:0044106 <1e-4 sl16052 G0:0034641 <1e-4 slr1565 G0:0005575 <1e-4 slr0157 G0:0016787 0.1112  
sl11866 G0:0009056 <1e-4 sl10639 G0:0009150 <1e-4 slr1618 G0:0019362 <1e-4 sl10785 G0:0044444 <1e-4 sl11426 G0:0016787 0.1112  
slr1327 G0:0005996 <1e-4 ss15113 G0:0009142 <1e-4 slr2004 G0:0055114 <1e-4 ss13142 G0:0044425 <1e-4 slr1918 G0:0016787 0.1112  
slr1591 G0:0090304 <1e-4 slr0195 G0:0009142 <1e-4 slr7091 G0:0009124 <1e-4 sl15132 G0:0044446 <1e-4 sl11186 G0:0016787 0.1112  
slr0318 G0:0009142 <1e-4 sssl5091 G0:0009889 <1e-4 slr6088 G0:0009262 <1e-4 slr0852 G0:0005575 <1e-4 sl10596 G0:0016787 0.1112  
slr6066 G0:0006220 <1e-4 slr1275 G0:0009309 <1e-4 slr6094 G0:0009893 <1e-4 sl11547 G0:0044464 <1e-4 slr0551 G0:0016787 0.1112  
sl12007 G0:0006576 <1e-4 slr5073 G0:0009124 <1e-4 slr0699 G0:0009263 <1e-4 slr0038 G0:0044424 <1e-4 sl10447 G0:0016787 0.1112  
sl11240 G0:0009144 <1e-4 slr6100 G0:0019752 <1e-4 sl10503 G0:0042451 <1e-4 slr0780 G0:0044422 <1e-4 sl11934 G0:0016787 0.1112  
sl11306 G0:0006720 <1e-4 sssr1473 G0:0033013 <1e-4 slr5102 G0:0006753 <1e-4 slr1032 G0:0044425 <1e-4 sl10283 G0:0016787 0.1112  
sl12013 G0:0034654 <1e-4 slr2012 G0:0006163 <1e-4 sl11251 G0:0055086 <1e-4 sl10319 G0:0044446 <1e-4 sl11247 G0:0016787 0.1112  
slr1464 G0:0044260 <1e-4 sl10479 G0:0031323 <1e-4 sl11681 G0:0009987 <1e-4 sg10002 G0:0044425 <1e-4 sl10296 G0:0016787 0.1112  
slr7096 G0:0044260 <1e-4 slr0728 G0:0006811 <1e-4 slr1799 G0:0009394 <1e-4 ss12749 G0:0044446 <1e-4 sssr0536 G0:0016787 0.1112  
slr1599 G0:0009262 <1e-4 slr6045 G0:0052111 <1e-4 sl10572 G0:0001932 <1e-4 slr1573 G0:0044464 <1e-4 slr1900 G0:0016787 0.1112  
ssr2754 G0:0042451 <1e-4 sl11775 G0:0006631 <1e-4 sl11764 G0:0009893 <1e-4 sl10176 G0:0005575 <1e-4 slr1391 G0:0016787 0.1112  
slr1449 G0:0043549 <1e-4 slr1789 G0:0009059 <1e-4 slr0957 G0:0048519 <1e-4 slr0147 G0:0044425 <1e-4 slr1612 G0:0016787 0.1112  
slr0806 G0:0006220 <1e-4 slr1101 G0:0072527 <1e-4 sl11911 G0:0006163 <1e-4 sl10857 G0:0044464 <1e-4 sl11218 G0:0016787 0.1112  
slr6104 G0:0043412 <1e-4 sl17087 G0:0018130 <1e-4 slr1442 G0:0071842 <1e-4 slr5024 G0:0005575 <1e-4 slr0287 G0:0016787 0.1112

s115128 G0:0051188 <1e-4 s111715 G0:0051188 <1e-4 s110602 G0:0009165 <1e-4 ss15025 G0:0005575 <1e-4 slr1066 G0:0016787 0.1112  
slr0590 G0:0010556 <1e-4 s111052 G0:0031326 <1e-4 slr1397 G0:0009126 <1e-4 slr6038 G0:0044422 <1e-4 slr1045 G0:0016787 0.1112  
s115033 G0:0034654 <1e-4 s111784 G0:0051347 <1e-4 ss11464 G0:0016054 <1e-4 slr1236 G0:0043226 <1e-4 slr1866 G0:0016787 0.1112  
s110854 G0:0005996 <1e-4 slr0924 G0:0006091 <1e-4 s110296 G0:0031323 <1e-4 slr0416 G0:0044464 <1e-4 slr1896 G0:0016787 0.1112  
s118027 G0:0022411 <1e-4 s110670 G0:0072528 <1e-4 slr1505 G0:0009126 <1e-4 s110811 G0:0043226 <1e-4 slr0376 G0:0016787 0.1112  
s110532 G0:0009165 <1e-4 slr0935 G0:0009991 <1e-4 slr1183 G0:0006811 <1e-4 slr6028 G0:0005575 <1e-4 slr1917 G0:0016787 0.1112  
slr0287 G0:0072528 <1e-4 slr0479 G0:0051716 <1e-4 slr1544 G0:0006066 <1e-4 slr0635 G0:0005575 <1e-4 slr1196 G0:0016787 0.1112  
s111763 G0:0051171 <1e-4 s111651 G0:0071554 <1e-4 ss13692 G0:0006066 <1e-4 s110102 G0:0044424 <1e-4 s110148 G0:0016787 0.1112  
slr0937 G0:0009987 <1e-4 slr0146 G0:0033013 <1e-4 s110446 G0:0048878 <1e-4 s111960 G0:0043226 <1e-4 slr0503 G0:0016787 0.1112  
s110423 G0:0044106 <1e-4 s110545 G0:0009308 <1e-4 sss1951 G0:0034654 <1e-4 sss2755 G0:0005575 <1e-4 slr1222 G0:0016787 0.1112  
slr6006 G0:0050896 <1e-4 slr0491 G0:0080090 <1e-4 s110980 G0:0009144 <1e-4 s110448 G0:0044444 <1e-4 slr0852 G0:0016787 0.1112  
slr0374 G0:0009124 <1e-4 slr0848 G0:0009144 <1e-4 slr1613 G0:0006721 <1e-4 ss12781 G0:0043226 <1e-4 slr1353 G0:0016787 0.1112  
s110181 G0:0090304 <1e-4 slr2073 G0:0051818 <1e-4 slr0179 G0:0051347 <1e-4 ss15113 G0:0005575 <1e-4 s110360 G0:0016787 0.1112  
s112011 G0:0080090 <1e-4 sss10352 G0:0052188 <1e-4 slr0589 G0:0006811 <1e-4 s110518 G0:0044444 <1e-4 slr0423 G0:0016787 0.1112  
slr1398 G0:0080090 <1e-4 slr0554 G0:0042455 <1e-4 s111495 G0:0046907 <1e-4 s111969 G0:0044444 <1e-4 s111942 G0:0016787 0.1112  
slr6029 G0:0042451 <1e-4 slr0147 G0:0051716 <1e-4 s110898 G0:0055086 <1e-4 slr1444 G0:0043226 <1e-4 slr1398 G0:0016787 0.1112  
s110933 G0:0090304 <1e-4 s110263 G0:0055086 <1e-4 slr0888 G0:0009144 <1e-4 slr1648 G0:0044464 <1e-4 s110274 G0:0016787 0.1112  
s111632 G0:0065007 <1e-4 s110847 G0:0072528 <1e-4 slr07025 G0:0006811 <1e-4 s111272 G0:0044424 <1e-4 slr1194 G0:0016787 0.1112  
slr1816 G0:0009141 <1e-4 slr1990 G0:0009057 <1e-4 s111766 G0:0019637 <1e-4 s110068 G0:0044422 <1e-4 sss1375 G0:0016787 0.1112  
slr2111 G0:0022411 <1e-4 sss5011 G0:0052188 <1e-4 s110188 G0:0060255 <1e-4 ss12971 G0:0044444 <1e-4 s111542 G0:0016787 0.1112  
s117065 G0:0009263 <1e-4 sss2551 G0:0042180 <1e-4 slr0581 G0:0009262 <1e-4 s111265 G0:0044444 <1e-4 slr0476 G0:0016787 0.1112  
ss12065 G0:0016054 <1e-4 s111388 G0:0048519 <1e-4 s111902 G0:0044271 <1e-4 s110191 G0:0044424 <1e-4 slr0209 G0:0016787 0.1112  
slr2027 G0:0009309 <1e-4 slr0871 G0:0051716 <1e-4 slr2105 G0:0031640 <1e-4 slr1230 G0:0044464 <1e-4 slr1025 G0:0016787 0.1112  
slr0609 G0:0050896 <1e-4 s111225 G0:0046128 <1e-4 slr1799 G0:0051186 <1e-4 slr0964 G0:0044422 <1e-4 slr0304 G0:0016787 0.1112  
ssr1155 G0:0019751 <1e-4 s110608 G0:0006091 <1e-4 slr0699 G0:0009262 <1e-4 slr1811 G0:0043226 <1e-4 slr1505 G0:0016787 0.1112  
s110827 G0:0009165 <1e-4 slr6101 G0:0009308 <1e-4 slr6080 G0:0051171 <1e-4 sss3189 G0:0044425 <1e-4 s110864 G0:0016787 0.1112  
s111738 G0:0009123 <1e-4 s111638 G0:0009161 <1e-4 sss2551 G0:0043933 <1e-4 s110875 G0:0043226 <1e-4 s110354 G0:0016787 0.1112  
slr0496 G0:0051186 <1e-4 slr1668 G0:0009987 <1e-4 slr1053 G0:0044106 <1e-4 slr0725 G0:0044424 <1e-4 slr0876 G0:0016787 0.1112  
s110710 G0:0009262 <1e-4 slr1240 G0:0006793 <1e-4 slr5037 G0:0071496 <1e-4 slr1413 G0:0044424 <1e-4 s110743 G0:0016787 0.1112  
s110068 G0:0019752 <1e-4 sss15096 G0:0008610 <1e-4 s111884 G0:0009132 <1e-4 s110265 G0:0044444 <1e-4 slr1659 G0:0016787 0.1112  
s111192 G0:0044248 <1e-4 slr0476 G0:0090304 <1e-4 slr1519 G0:0009141 <1e-4 s110488 G0:0044424 <1e-4 sss3532 G0:0016787 0.1112  
s110839 G0:0072521 <1e-4 slr0108 G0:0080090 <1e-4 slr0551 G0:0009165 <1e-4 slr0356 G0:0044424 <1e-4 s110985 G0:0005488 0.1103  
slr0146 G0:0046164 <1e-4 s111601 G0:0006753 <1e-4 slr0784 G0:0009308 <1e-4 slr1363 G0:0044422 <1e-4 s110283 G0:0017111 0.1098  
s110410 G0:0046907 <1e-4 s111531 G0:0044260 <1e-4 s110293 G0:0019752 <1e-4 slr6081 G0:0044422 <1e-4 slr0157 G0:0017111 0.1098  
s117066 G0:0006811 <1e-4 slr0168 G0:0090304 <1e-4 s110710 G0:0019362 <1e-4 s117078 G0:0044444 <1e-4 slr1918 G0:0017111 0.1098  
slr1932 G0:0009263 <1e-4 s111352 G0:0019751 <1e-4 s118001 G0:0005996 <1e-4 slr0168 G0:0044464 <1e-4 slr1196 G0:0017111 0.1098  
slr6022 G0:0051818 <1e-4 slr0921 G0:0065007 <1e-4 slr5023 G0:0051716 <1e-4 slr0053 G0:0044464 <1e-4 sss13692 G0:0017111 0.1098  
ss12733 G0:0006793 <1e-4 s110846 G0:0001932 <1e-4 slr6091 G0:0050801 <1e-4 s110558 G0:0044464 <1e-4 s110615 G0:0017111 0.1098  
s111068 G0:0019751 <1e-4 slr0482 G0:0071496 <1e-4 s117086 G0:0009150 <1e-4 slr1919 G0:0044464 <1e-4 slr0250 G0:0017111 0.1098  
slr1236 G0:0050896 <1e-4 slr1122 G0:0019752 <1e-4 s110376 G0:0065007 <1e-4 s111352 G0:0005575 <1e-4 s110447 G0:0017111 0.1098  
ss11520 G0:0044282 <1e-4 slr1547 G0:0009059 <1e-4 slr1186 G0:0034654 <1e-4 s110473 G0:0043226 <1e-4 s111542 G0:0017111 0.1098  
s111880 G0:0051171 <1e-4 s110785 G0:0050896 <1e-4 s111913 G0:0009308 <1e-4 s111262 G0:0044444 <1e-4 slr1194 G0:0017111 0.1098  
s111583 G0:0051246 <1e-4 s110661 G0:0043549 <1e-4 slr5118 G0:0009132 <1e-4 slr0356 G0:0005575 <1e-4 s111455 G0:0017111 0.1098  
s110060 G0:0055086 <1e-4 slr7098 G0:0019752 <1e-4 slr1537 G0:0051716 <1e-4 sss3570 G0:0043226 <1e-4 slr1127 G0:0017111 0.1098  
slr6045 G0:0044255 <1e-4 slr1415 G0:0065007 <1e-4 slr5119 G0:0051716 <1e-4 s110297 G0:0043226 <1e-4 slr0076 G0:0017111 0.1098  
slr1880 G0:0008150 <1e-4 slr6066 G0:0072528 <1e-4 sss12781 G0:0051234 <1e-4 slr0634 G0:0044444 <1e-4 s111318 G0:0017111 0.1098  
slr0667 G0:0072524 <1e-4 s111240 G0:0050794 <1e-4 s117086 G0:0071496 <1e-4 s110488 G0:0044444 <1e-4 s110354 G0:0017111 0.1098  
slr0981 G0:0043412 <1e-4 slr0654 G0:0051186 <1e-4 slr1070 G0:0006576 <1e-4 slr2027 G0:0044444 <1e-4 s111060 G0:0017111 0.1098  
ssr6062 G0:0071842 <1e-4 sss3467 G0:0042180 <1e-4 s110188 G0:0042180 <1e-4 slr0610 G0:0044425 <1e-4 slr1023 G0:0017111 0.1098  
slr1964 G0:0009893 <1e-4 slr0341 G0:0019752 <1e-4 slr0613 G0:0019751 <1e-4 s111692 G0:0044422 <1e-4 slr1441 G0:0017111 0.1098  
s110596 G0:0009199 <1e-4 slr7100 G0:0046907 <1e-4 s115046 G0:0009262 <1e-4 s117062 G0:0043226 <1e-4 s110296 G0:0017111 0.1098  
ssr6089 G0:0044283 <1e-4 s110611 G0:0050789 <1e-4 sss6048 G0:0009142 <1e-4 sss2754 G0:0044424 <1e-4 slr0551 G0:0017111 0.1098  
ssr2615 G0:0022607 <1e-4 s110376 G0:0006066 <1e-4 slr0468 G0:0042180 <1e-4 slr7010 G0:0044444 <1e-4 s111433 G0:0017111 0.1098  
slr0505 G0:0031326 <1e-4 slr1462 G0:0048518 <1e-4 slr1577 G0:0009117 <1e-4 slr0111 G0:0005575 <1e-4 slr1376 G0:0017111 0.1098

|          |            |       |          |            |       |          |            |       |          |            |       |          |            |        |
|----------|------------|-------|----------|------------|-------|----------|------------|-------|----------|------------|-------|----------|------------|--------|
| ssl1004  | G0:0051171 | <1e-4 | slr0751  | G0:0006732 | <1e-4 | ssl1690  | G0:0022838 | <1e-4 | ssr2201  | G0:0005575 | <1e-4 | ssr1698  | G0:0017111 | 0.1098 |
| sl10525  | G0:0055086 | <1e-4 | slr0271  | G0:0051171 | <1e-4 | ssr2060  | G0:0022857 | <1e-4 | sl11956  | G0:0044444 | <1e-4 | slr0243  | G0:0017111 | 0.1098 |
| sl11476  | G0:0006576 | <1e-4 | slr1068  | G0:0051246 | <1e-4 | sl18004  | G0:0008171 | <1e-4 | sl11304  | G0:0044446 | <1e-4 | sl110301 | G0:0017111 | 0.1098 |
| sl11691  | G0:0031323 | <1e-4 | sl18040  | G0:0006732 | <1e-4 | slr5116  | G0:0016818 | <1e-4 | ss16092  | G0:0005575 | <1e-4 | ss10109  | G0:0017111 | 0.1098 |
| slr8014  | G0:0050789 | <1e-4 | slr0784  | G0:0048519 | <1e-4 | slr1603  | G0:0015075 | <1e-4 | slr1862  | G0:0044446 | <1e-4 | sl110864 | G0:0017111 | 0.1098 |
| slr1590  | G0:0009150 | <1e-4 | slr1470  | G0:0044255 | <1e-4 | ssl1300  | G0:0015291 | <1e-4 | slr0250  | G0:0044446 | <1e-4 | sl110513 | G0:0017111 | 0.1098 |
| slr1033  | G0:0008150 | <1e-4 | slr1307  | G0:0018130 | <1e-4 | slr0039  | G0:0015405 | <1e-4 | sl11505  | G0:0044464 | <1e-4 | slr1917  | G0:0017111 | 0.1098 |
| slr1270  | G0:0009892 | <1e-4 | sl110188 | G0:0019637 | <1e-4 | sl11573  | G0:0022857 | <1e-4 | ssr2067  | G0:0044425 | <1e-4 | slr0287  | G0:0017111 | 0.1098 |
| slr2004  | G0:0044282 | <1e-4 | ssl3451  | G0:0006766 | <1e-4 | slr2105  | G0:0022890 | <1e-4 | ssr1114  | G0:0043226 | <1e-4 | sl110148 | G0:0017111 | 0.1098 |
| sl10413  | G0:0031640 | <1e-4 | sl11307  | G0:0006091 | <1e-4 | sl11166  | G0:0022838 | <1e-4 | slr6051  | G0:0005575 | <1e-4 | slr1045  | G0:0017111 | 0.1098 |
| ssl5008  | G0:0019752 | <1e-4 | slr2110  | G0:0051171 | <1e-4 | sl10752  | G0:0022832 | <1e-4 | slr0192  | G0:0044446 | <1e-4 | slr1398  | G0:0017111 | 0.1098 |
| slr7098  | G0:0071554 | <1e-4 | ssr2843  | G0:0009150 | <1e-4 | slr2070  | G0:0015291 | <1e-4 | slr0971  | G0:0044422 | <1e-4 | sl111135 | G0:0017111 | 0.1098 |
| sl11858  | G0:0009987 | <1e-4 | sl11583  | G0:0051716 | <1e-4 | sl11446  | G0:0008171 | <1e-4 | sl11757  | G0:0043226 | <1e-4 | slr0476  | G0:0017111 | 0.1098 |
| slr5021  | G0:0045184 | <1e-4 | slr7012  | G0:0044281 | <1e-4 | ssr5106  | G0:0015405 | <1e-4 | slr0730  | G0:0044425 | <1e-4 | sl11472  | G0:0017111 | 0.1098 |
| slr2118  | G0:0055086 | <1e-4 | ssl2065  | G0:0050789 | <1e-4 | sl11736  | G0:0022832 | <1e-4 | sl10482  | G0:0043226 | <1e-4 | slr0305  | G0:0017111 | 0.1098 |
| slr1425  | G0:0006811 | <1e-4 | slr0013  | G0:0051347 | <1e-4 | slr1168  | G0:0016741 | <1e-4 | ssr1155  | G0:0044444 | <1e-4 | sl110382 | G0:0017111 | 0.1098 |
| ssr0335  | G0:0034641 | <1e-4 | slr1032  | G0:0008610 | <1e-4 | slr1647  | G0:0015293 | <1e-4 | sl10372  | G0:0005575 | <1e-4 | sl110508 | G0:0017111 | 0.1098 |
| ssr3532  | G0:0009056 | <1e-4 | slr1070  | G0:0009263 | <1e-4 | slr1623  | G0:0015291 | <1e-4 | slr1179  | G0:0044446 | <1e-4 | sl111942 | G0:0017111 | 0.1098 |
| slr5037  | G0:0051716 | <1e-4 | slr1444  | G0:0072524 | <1e-4 | slr0871  | G0:0008171 | <1e-4 | sl10503  | G0:0005575 | <1e-4 | ssr3532  | G0:0017111 | 0.1098 |
| sl10670  | G0:0009199 | <1e-4 | sl110564 | G0:0052111 | <1e-4 | sl15003  | G0:0015291 | <1e-4 | sl10638  | G0:0044422 | <1e-4 | ssr1375  | G0:0017111 | 0.1098 |
| slr0211  | G0:0051171 | <1e-4 | sl11552  | G0:0009056 | <1e-4 | sl10661  | G0:0015405 | <1e-4 | slr1565  | G0:0044425 | <1e-4 | slr0876  | G0:0017111 | 0.1098 |
| sl10625  | G0:0009263 | <1e-4 | sl11902  | G0:0051186 | <1e-4 | sl11191  | G0:0015291 | <1e-4 | slr1025  | G0:0044444 | <1e-4 | sl11586  | G0:0017111 | 0.1098 |
| slr1376  | G0:0044282 | <1e-4 | sl10372  | G0:0055082 | <1e-4 | slr0924  | G0:0015267 | <1e-4 | sl11002  | G0:0044446 | <1e-4 | slr1866  | G0:0017111 | 0.1098 |
| sl10309  | G0:0044271 | <1e-4 | ssr7072  | G0:0009124 | <1e-4 | sl11797  | G0:0060089 | <1e-4 | slr7060  | G0:0044422 | <1e-4 | slr1896  | G0:0017111 | 0.1098 |
| slr0053  | G0:0006811 | <1e-4 | ssr2333  | G0:0016052 | <1e-4 | slr6080  | G0:0016746 | <1e-4 | ss13549  | G0:0005575 | <1e-4 | ssr2848  | G0:0017111 | 0.1098 |
| slr1142  | G0:0042180 | <1e-4 | sl110735 | G0:0009141 | <1e-4 | slr1980  | G0:0015291 | <1e-4 | slr1565  | G0:0044444 | <1e-4 | slr0545  | G0:0017111 | 0.1098 |
| ssl3383  | G0:0022607 | <1e-4 | ssr2553  | G0:0055114 | <1e-4 | slr1915  | G0:0015293 | <1e-4 | slr2048  | G0:0044446 | <1e-4 | sl10996  | G0:0017111 | 0.1098 |
| sl110101 | G0:0031323 | <1e-4 | sl111942 | G0:0046483 | <1e-4 | slr0285  | G0:0015293 | <1e-4 | sl10931  | G0:0005575 | <1e-4 | slr0871  | G0:0017111 | 0.1098 |
| sl11652  | G0:0009161 | <1e-4 | slr0771  | G0:0060255 | <1e-4 | ssr0335  | G0:0016818 | <1e-4 | slr0698  | G0:0044446 | <1e-4 | sl111934 | G0:0017111 | 0.1098 |
| slr0552  | G0:0009165 | <1e-4 | sl110545 | G0:0001932 | <1e-4 | sl10847  | G0:0015291 | <1e-4 | sl11447  | G0:0044422 | <1e-4 | sl11601  | G0:0017111 | 0.1098 |
| sl10513  | G0:0006082 | <1e-4 | slr7073  | G0:0022607 | <1e-4 | slr0241  | G0:0043492 | <1e-4 | sl11583  | G0:0044425 | <1e-4 | sl111174 | G0:0017111 | 0.1098 |
| slr6072  | G0:0043170 | <1e-4 | slr1056  | G0:0043549 | <1e-4 | slr1263  | G0:0016741 | <1e-4 | slr1342  | G0:0043226 | <1e-4 | slr1315  | G0:0017111 | 0.1094 |
| slr5087  | G0:0009132 | <1e-4 | sl11304  | G0:0009161 | <1e-4 | sl10047  | G0:0015405 | <1e-4 | ssr3571  | G0:0044424 | <1e-4 | slr0695  | G0:0017111 | 0.1094 |
| slr5087  | G0:0016053 | <1e-4 | ssr5120  | G0:0048878 | <1e-4 | slr1168  | G0:0022890 | <1e-4 | sl11866  | G0:0043226 | <1e-4 | sl10284  | G0:0017111 | 0.1094 |
| slr0172  | G0:0009057 | <1e-4 | sl118002 | G0:0008150 | <1e-4 | ss15108  | G0:0043167 | <1e-4 | slr0876  | G0:0044464 | <1e-4 | sl11638  | G0:0017111 | 0.1094 |
| slr0360  | G0:0006220 | <1e-4 | sl110588 | G0:0009893 | <1e-4 | sl11373  | G0:0022890 | <1e-4 | slr0725  | G0:0044464 | <1e-4 | slr1187  | G0:0017111 | 0.1094 |
| ssl1690  | G0:0044003 | <1e-4 | slr1863  | G0:0051347 | <1e-4 | slr1886  | G0:0016817 | <1e-4 | sl10072  | G0:0044444 | <1e-4 | sl110803 | G0:0017111 | 0.1094 |
| ssl3549  | G0:0072522 | <1e-4 | sl110586 | G0:0009889 | <1e-4 | sl117034 | G0:0015291 | <1e-4 | sl11163  | G0:0044422 | <1e-4 | sl117063 | G0:0017111 | 0.1094 |
| slr6028  | G0:0006721 | <1e-4 | ssl1464  | G0:0019362 | <1e-4 | sl111949 | G0:0008171 | <1e-4 | sl11265  | G0:0044424 | <1e-4 | slr7101  | G0:0017111 | 0.1094 |
| sl117033 | G0:0009987 | <1e-4 | slr1827  | G0:0050789 | <1e-4 | slr0789  | G0:0022892 | <1e-4 | sl11009  | G0:0044464 | <1e-4 | ss12920  | G0:0017111 | 0.1094 |
| slr1062  | G0:0009056 | <1e-4 | sl116052 | G0:0009893 | <1e-4 | sl10563  | G0:0003674 | <1e-4 | sl110803 | G0:0044422 | <1e-4 | slr0601  | G0:0017111 | 0.1094 |
| sl11606  | G0:0008150 | <1e-4 | sl110577 | G0:0001932 | <1e-4 | slr0489  | G0:0022832 | <1e-4 | sl11913  | G0:0044464 | <1e-4 | sl110846 | G0:0017111 | 0.1094 |
| ssr0536  | G0:0010468 | <1e-4 | slr2005  | G0:0043412 | <1e-4 | slr0699  | G0:0043492 | <1e-4 | ssr7036  | G0:0044444 | <1e-4 | ss17046  | G0:0017111 | 0.1094 |
| sl11424  | G0:0006066 | <1e-4 | slr1702  | G0:0001932 | <1e-4 | ss18008  | G0:0015267 | <1e-4 | ss12471  | G0:0005575 | <1e-4 | slr1365  | G0:0017111 | 0.1094 |
| ss12245  | G0:0009987 | <1e-4 | ssr3129  | G0:0009394 | <1e-4 | sl11862  | G0:0022832 | <1e-4 | sl10503  | G0:0044446 | <1e-4 | slr1534  | G0:0017111 | 0.1094 |
| sl11640  | G0:0006721 | <1e-4 | slr1450  | G0:0052188 | <1e-4 | sl11634  | G0:0005342 | <1e-4 | slr0586  | G0:0044464 | <1e-4 | sl115033 | G0:0017111 | 0.1094 |
| slr1342  | G0:0009309 | <1e-4 | sl11306  | G0:0031640 | <1e-4 | slr1083  | G0:0043167 | <1e-4 | sl11021  | G0:0005575 | <1e-4 | ss12420  | G0:0017111 | 0.1094 |
| sl117070 | G0:0072521 | <1e-4 | sl111173 | G0:0044271 | <1e-4 | slr0821  | G0:0016746 | <1e-4 | ss11707  | G0:0044444 | <1e-4 | ssr5120  | G0:0017111 | 0.1094 |
| sl117033 | G0:0009141 | <1e-4 | sl11095  | G0:0042180 | <1e-4 | slr1235  | G0:0015077 | <1e-4 | slr0609  | G0:0044424 | <1e-4 | slr1150  | G0:0017111 | 0.1094 |
| sl10156  | G0:0009260 | <1e-4 | sl110888 | G0:0009057 | <1e-4 | ssr7035  | G0:0016741 | <1e-4 | sl10066  | G0:0044422 | <1e-4 | slr1186  | G0:0017111 | 0.1094 |
| sl112013 | G0:0051234 | <1e-4 | slr1544  | G0:0009309 | <1e-4 | slr7100  | G0:0043167 | <1e-4 | slr1431  | G0:0044424 | <1e-4 | sl110659 | G0:0017111 | 0.1094 |
| ss10353  | G0:0060255 | <1e-4 | slr0655  | G0:0042451 | <1e-4 | sl10442  | G0:0003674 | <1e-4 | sl10525  | G0:0005575 | <1e-4 | slr7083  | G0:0017111 | 0.1094 |
| slr0670  | G0:0044282 | <1e-4 | ss10832  | G0:0031323 | <1e-4 | sl10218  | G0:0022892 | <1e-4 | sl10023  | G0:0043226 | <1e-4 | sl11866  | G0:0017111 | 0.1094 |
| slr1914  | G0:0006163 | <1e-4 | ss15100  | G0:0050896 | <1e-4 | sl118032 | G0:0022838 | <1e-4 | sl10623  | G0:0044446 | <1e-4 | sl110597 | G0:0017111 | 0.1094 |



slr1624 G0:0071841 <1e-4 slr2025 G0:0031326 <1e-4 sll1319 G0:0008171 <1e-4 slr0351 G0:0005575 <1e-4 slr7081 G0:0017111 0.1094  
slr1611 G0:0006066 <1e-4 slr0285 G0:0019222 <1e-4 slr0921 G0:0022892 <1e-4 sll7006 G0:0044425 <1e-4 slr0264 G0:0017111 0.1094  
ssl0739 G0:0006721 <1e-4 sss2802 G0:0044282 <1e-4 sss2912 G0:0015267 <1e-4 sll10263 G0:0044444 <1e-4 slr6067 G0:0017111 0.1094  
slr2110 G0:0050789 <1e-4 sll10350 G0:0009141 <1e-4 slr1258 G0:0016462 <1e-4 ss15064 G0:0044444 <1e-4 slr0655 G0:0017111 0.1094  
sll10096 G0:0034641 <1e-4 sll11372 G0:0046907 <1e-4 slr0006 G0:0022836 <1e-4 slr1816 G0:0044424 <1e-4 sll10857 G0:0017111 0.1094  
slr0273 G0:0019751 <1e-4 slr1441 G0:0009309 <1e-4 slr0505 G0:0043167 <1e-4 slr0692 G0:0005575 <1e-4 sss2554 G0:0017111 0.1094  
slr1660 G0:0046394 <1e-4 slr0605 G0:0051171 <1e-4 slr1260 G0:0022890 <1e-4 ssl1046 G0:0044422 <1e-4 sll15062 G0:0017111 0.1094  
slr1613 G0:0072527 <1e-4 sll11495 G0:0043648 <1e-4 slr0598 G0:0022857 <1e-4 slr6038 G0:0005575 <1e-4 slr7098 G0:0017111 0.1094  
sll11511 G0:0019751 <1e-4 sll10614 G0:0006220 <1e-4 sll10141 G0:0022892 <1e-4 slr1128 G0:0044444 <1e-4 ss15065 G0:0017111 0.1094  
slr1812 G0:0044260 <1e-4 sll11696 G0:0042180 <1e-4 slr1385 G0:0022838 <1e-4 slr0971 G0:0044424 <1e-4 sll11063 G0:0017111 0.1094  
slr0601 G0:0006631 <1e-4 sll15028 G0:0009165 <1e-4 sll10085 G0:0022803 <1e-4 slr7083 G0:0044422 <1e-4 sll11510 G0:0017111 0.1094  
sll1388 G0:0009394 <1e-4 sss13692 G0:0009132 <1e-4 sll10596 G0:0022891 <1e-4 sll11939 G0:0043226 <1e-4 slr1195 G0:0017111 0.1094  
sll11464 G0:0008610 <1e-4 sll10354 G0:0042455 <1e-4 slr1917 G0:0060089 <1e-4 sll10253 G0:0005575 <1e-4 sll10436 G0:0017111 0.1094  
slr0869 G0:0051246 <1e-4 slr1209 G0:0051234 <1e-4 slr0976 G0:0043167 <1e-4 slr0291 G0:0044422 <1e-4 slr1178 G0:0017111 0.1094  
sll11318 G0:0006733 <1e-4 sss13829 G0:0009165 <1e-4 sss12162 G0:0016741 <1e-4 sll11151 G0:0044444 <1e-4 sss3341 G0:0017111 0.1094  
slr6080 G0:0046394 <1e-4 sll10584 G0:0031323 <1e-4 slr0006 G0:0016818 <1e-4 sll10691 G0:0044464 <1e-4 slr1470 G0:0017111 0.1094  
ss18005 G0:0009260 <1e-4 sll10586 G0:0006811 <1e-4 sss17074 G0:0022892 <1e-4 sll11373 G0:0005575 <1e-4 ss15098 G0:0017111 0.1094  
sll17065 G0:0006576 <1e-4 slr1413 G0:0044271 <1e-4 slr1170 G0:0005342 <1e-4 slr0769 G0:0044464 <1e-4 sll11461 G0:0017111 0.1094  
sll11092 G0:0008610 <1e-4 sss12384 G0:0009150 <1e-4 sll11939 G0:0016818 <1e-4 slr0294 G0:0044444 <1e-4 sss0332 G0:0017111 0.1094  
sss5011 G0:0051234 <1e-4 sss0102 G0:0048523 <1e-4 slr6049 G0:0043492 <1e-4 sss8047 G0:0044446 <1e-4 slr0552 G0:0017111 0.1094  
ss12814 G0:0009165 <1e-4 slr1186 G0:0072528 <1e-4 sll10861 G0:0046873 <1e-4 sll10688 G0:0043226 <1e-4 sll11939 G0:0017111 0.1094  
sll10735 G0:0009991 <1e-4 slr0869 G0:0048523 <1e-4 sll11400 G0:0022890 <1e-4 sll10175 G0:0044444 <1e-4 slr0598 G0:0017111 0.1094  
slr0852 G0:0009260 <1e-4 sll10788 G0:0009144 <1e-4 sss11255 G0:0005342 <1e-4 sll10981 G0:0043226 <1e-4 ss15045 G0:0017111 0.1094  
slr0360 G0:0009059 <1e-4 slr1082 G0:0046128 <1e-4 sll10867 G0:0022832 <1e-4 slr1677 G0:0044422 <1e-4 sll10811 G0:0017111 0.1094  
sll10905 G0:0034654 <1e-4 sll11472 G0:0009123 <1e-4 sll10525 G0:0043167 <1e-4 sll11121 G0:0044446 <1e-4 sll10282 G0:0017111 0.1094  
sll15003 G0:0071840 <1e-4 slr0989 G0:0043412 <1e-4 slr1788 G0:0022836 <1e-4 slr1827 G0:0044444 <1e-4 slr0971 G0:0017111 0.1094  
sll10804 G0:0034641 <1e-4 slr1376 G0:0055114 <1e-4 sll11902 G0:0015291 <1e-4 slr6072 G0:0044425 <1e-4 slr1097 G0:0017111 0.1094  
slr1600 G0:0051186 <1e-4 sll10253 G0:0006082 <1e-4 sll10268 G0:0015077 <1e-4 slr0204 G0:0005575 <1e-4 sss1499 G0:0017111 0.1094  
slr1084 G0:0006766 <1e-4 sll11675 G0:0009124 <1e-4 slr7081 G0:0016462 <1e-4 slr0728 G0:0005575 <1e-4 slr7082 G0:0017111 0.1094  
sll10405 G0:0019222 <1e-4 slr0049 G0:0009893 <1e-4 sss12471 G0:0022891 <1e-4 slr0482 G0:0044424 <1e-4 sss7072 G0:0017111 0.1094  
sll10656 G0:0009262 <1e-4 sss17038 G0:0046394 <1e-4 slr2110 G0:0060089 <1e-4 sll10488 G0:0044464 <1e-4 slr1306 G0:0017111 0.1094  
slr1800 G0:0065007 <1e-4 slr1468 G0:0009150 <1e-4 slr0157 G0:0043167 <1e-4 slr7091 G0:0005575 <1e-4 sll10802 G0:0017111 0.1094  
slr1143 G0:0031640 <1e-4 slr7094 G0:0009057 <1e-4 sss2843 G0:0022832 <1e-4 slr1900 G0:0044425 <1e-4 sll10419 G0:0017111 0.1094  
slr0787 G0:0044255 <1e-4 slr1338 G0:0044106 <1e-4 slr2048 G0:0016817 <1e-4 sll11634 G0:0044424 <1e-4 slr0355 G0:0017111 0.1094  
slr1210 G0:0010468 <1e-4 slr1918 G0:0044255 <1e-4 sll10995 G0:0015405 <1e-4 slr0514 G0:0044446 <1e-4 slr2101 G0:0017111 0.1094  
slr0919 G0:0051716 <1e-4 sll11061 G0:0009308 <1e-4 sll11730 G0:0022832 <1e-4 slr1721 G0:0044464 <1e-4 sss11923 G0:0017111 0.1094  
slr5013 G0:0009199 <1e-4 slr0870 G0:0080090 <1e-4 sll11714 G0:0043167 <1e-4 slr1073 G0:0005575 <1e-4 sll10886 G0:0017111 0.1094  
ss15114 G0:0044283 <1e-4 sll11891 G0:0044282 <1e-4 sss2848 G0:0060089 <1e-4 sll10864 G0:0044424 <1e-4 sll11884 G0:0017111 0.1094  
sss2998 G0:0072527 <1e-4 sll18002 G0:0044260 <1e-4 sll17047 G0:0022803 <1e-4 sll10160 G0:0043226 <1e-4 slr1923 G0:0017111 0.1094  
sll11938 G0:0072524 <1e-4 sll10218 G0:0009057 <1e-4 slr1670 G0:0008171 <1e-4 slr1896 G0:0044444 <1e-4 slr1261 G0:0017111 0.1094  
slr2073 G0:0043549 <1e-4 slr0605 G0:0009141 <1e-4 sll15028 G0:0016462 <1e-4 slr1169 G0:0044425 <1e-4 sss12245 G0:0017111 0.1094  
sll10525 G0:0065007 <1e-4 slr7101 G0:0048518 <1e-4 sss12920 G0:0016818 <1e-4 sll10445 G0:0043226 <1e-4 slr1362 G0:0017111 0.1094  
sll10939 G0:0046164 <1e-4 sss11046 G0:0031640 <1e-4 slr7101 G0:0016746 <1e-4 sll15109 G0:0044446 <1e-4 sll10994 G0:0017111 0.1094  
slr0023 G0:0009123 <1e-4 slr1083 G0:0034660 <1e-4 sss11972 G0:0015399 <1e-4 slr0658 G0:0005575 <1e-4 slr0751 G0:0017111 0.1094  
slr1638 G0:0031326 <1e-4 sss13615 G0:0045184 <1e-4 slr1082 G0:0022832 <1e-4 slr0967 G0:0044444 <1e-4 slr2032 G0:0017111 0.1094  
sll11784 G0:0050794 <1e-4 sll10863 G0:0009308 <1e-4 sll10102 G0:0015077 <1e-4 slr1906 G0:0044464 <1e-4 slr1677 G0:0017111 0.1094  
ss12162 G0:0031323 <1e-4 sll10732 G0:0016052 <1e-4 sll10147 G0:0022836 <1e-4 slr1647 G0:0044424 <1e-4 slr5023 G0:0017111 0.1094  
slr1752 G0:0043648 <1e-4 sll11766 G0:0009123 <1e-4 slr0872 G0:0043492 <1e-4 sll11151 G0:0005575 <1e-4 sll10176 G0:0017111 0.1094  
slr1169 G0:0019751 <1e-4 slr1557 G0:0009142 <1e-4 sll10156 G0:0022832 <1e-4 sll10905 G0:0044446 <1e-4 sss13383 G0:0017111 0.1094  
slr0742 G0:0019362 <1e-4 sll10602 G0:0006766 <1e-4 sll10547 G0:0015267 <1e-4 sll11693 G0:0005575 <1e-4 sss3410 G0:0017111 0.1094  
sll17050 G0:0009142 <1e-4 sll10804 G0:0046164 <1e-4 sss2611 G0:0060089 <1e-4 slr1468 G0:0005575 <1e-4 sss6026 G0:0017111 0.1094  
sss0102 G0:0072527 <1e-4 slr0519 G0:0042451 <1e-4 slr1977 G0:0060089 <1e-4 sll11608 G0:0044425 <1e-4 sss2611 G0:0017111 0.1094  
sll11696 G0:0034641 <1e-4 sll10265 G0:0009124 <1e-4 sll11698 G0:0003674 <1e-4 slr0959 G0:0044446 <1e-4 sll11348 G0:0017111 0.1094  
slr0848 G0:0009056 <1e-4 sss17021 G0:0009150 <1e-4 sll10688 G0:0015077 <1e-4 slr0771 G0:0044424 <1e-4 sll10473 G0:0017111 0.1094

sl10735 G0:0051716 <1e-4 slr0590 G0:0009262 <1e-4 slr1753 G0:0005342 <1e-4 slr0326 G0:0005575 <1e-4 slr6013 G0:0017111 0.1094  
ssl1263 G0:0072522 <1e-4 slr5037 G0:0006631 <1e-4 slr0765 G0:0015267 <1e-4 ssl1707 G0:0044422 <1e-4 ssl1407 G0:0017111 0.1094  
sl10175 G0:0071841 <1e-4 slr1301 G0:0044255 <1e-4 ssl1417 G0:0022832 <1e-4 slr6012 G0:0044425 <1e-4 sl18032 G0:0017111 0.1094  
slr2032 G0:0008150 <1e-4 sl11373 G0:0048878 <1e-4 slr6081 G0:0016462 <1e-4 slr7097 G0:0044424 <1e-4 slr0337 G0:0017111 0.1094  
slr0962 G0:0006066 <1e-4 sl17047 G0:0009141 <1e-4 ssl3379 G0:0022891 <1e-4 ssl8039 G0:0044424 <1e-4 sg10001 G0:0017111 0.1094  
slr1599 G0:0019219 <1e-4 sl10641 G0:0042180 <1e-4 sl15061 G0:0022803 <1e-4 sl10487 G0:0005575 <1e-4 slr1223 G0:0017111 0.1094  
ssl15114 G0:0008150 <1e-4 slr1670 G0:0051716 <1e-4 sl11995 G0:0015405 <1e-4 slr0619 G0:0044446 <1e-4 slr1566 G0:0017111 0.1094  
slr1505 G0:0034654 <1e-4 slr6072 G0:0022411 <1e-4 sl10742 G0:0016462 <1e-4 slr1183 G0:0044425 <1e-4 slr0356 G0:0017111 0.1094  
sl10499 G0:0055086 <1e-4 ssl3300 G0:0008150 <1e-4 slr1940 G0:0015077 <1e-4 sl11902 G0:0044444 <1e-4 sl10008 G0:0017111 0.1094  
ssl3379 G0:0019362 <1e-4 sl10787 G0:0046907 <1e-4 sl10565 G0:0015267 <1e-4 sl10266 G0:0044444 <1e-4 ssl5095 G0:0017111 0.1094  
slr6006 G0:0009150 <1e-4 slr5087 G0:0006753 <1e-4 sl15046 G0:0005342 <1e-4 sl10898 G0:0044424 <1e-4 slr0262 G0:0017111 0.1094  
slr0852 G0:0009394 <1e-4 slr1127 G0:0006720 <1e-4 slr0670 G0:0016817 <1e-4 slr0708 G0:0044425 <1e-4 sl11414 G0:0017111 0.1094  
sl11052 G0:0050896 <1e-4 sl11285 G0:0044281 <1e-4 sl11735 G0:0015075 <1e-4 slr1627 G0:0044446 <1e-4 ssl1417 G0:0017111 0.1094  
sl11068 G0:0001932 <1e-4 sl11541 G0:0009309 <1e-4 slr0476 G0:0016818 <1e-4 sl10762 G0:0043226 <1e-4 sl11155 G0:0017111 0.1094  
slr6013 G0:0044275 <1e-4 slr7010 G0:0080090 <1e-4 slr0345 G0:0022891 <1e-4 slr1668 G0:0044422 <1e-4 slr1260 G0:0017111 0.1094  
slr1397 G0:0072527 <1e-4 ssl1464 G0:0006811 <1e-4 slr1236 G0:0015293 <1e-4 slr6016 G0:0044422 <1e-4 sl10860 G0:0017111 0.1094  
slr0695 G0:0072521 <1e-4 slr1915 G0:0006220 <1e-4 slr1287 G0:0015405 <1e-4 slr1194 G0:0043226 <1e-4 slr1914 G0:0017111 0.1094  
ssl6003 G0:0009059 <1e-4 ssl5091 G0:0048523 <1e-4 slr1207 G0:0022892 <1e-4 sl11285 G0:0005575 <1e-4 sl10293 G0:0017111 0.1094  
slr0325 G0:0009144 <1e-4 slr0770 G0:0016054 <1e-4 sl10062 G0:0015075 <1e-4 sl10096 G0:0044464 <1e-4 slr1207 G0:0017111 0.1094  
sl11092 G0:0071841 <1e-4 ssl1698 G0:0009056 <1e-4 slr7059 G0:0042623 <1e-4 slr5115 G0:0005575 <1e-4 slr1339 G0:0017111 0.1094  
sl11542 G0:0006631 <1e-4 slr7013 G0:0009987 <1e-4 ssl6089 G0:0008171 <1e-4 ssl2717 G0:0043226 <1e-4 slr6014 G0:0017111 0.1094  
ssl2245 G0:0034654 <1e-4 slr1187 G0:0051246 <1e-4 slr1107 G0:0022803 <1e-4 slr0065 G0:0044446 <1e-4 slr6021 G0:0017111 0.1094  
sl10871 G0:0044248 <1e-4 sl11130 G0:0009199 <1e-4 slr1854 G0:0022892 <1e-4 sl10925 G0:0043226 <1e-4 sl11961 G0:0017111 0.1094  
ssl10787 G0:0009991 <1e-4 slr2010 G0:0022411 <1e-4 slr0360 G0:0022891 <1e-4 slr1970 G0:0044422 <1e-4 slr7097 G0:0017111 0.1094  
ssl3410 G0:0009889 <1e-4 slr1944 G0:0009991 <1e-4 sl11785 G0:0022803 <1e-4 sl11835 G0:0044444 <1e-4 sl17062 G0:0017111 0.1094  
slr0872 G0:0090304 <1e-4 slr0496 G0:0009165 <1e-4 slr0870 G0:0015405 <1e-4 slr0870 G0:0044446 <1e-4 sl11232 G0:0017111 0.1094  
sl10168 G0:0009991 <1e-4 slr1235 G0:0051179 <1e-4 slr1444 G0:0015405 <1e-4 sl11053 G0:0044446 <1e-4 sl11355 G0:0017111 0.1094  
slr1047 G0:0051179 <1e-4 ssl5019 G0:0010556 <1e-4 slr0551 G0:0016741 <1e-4 sl11388 G0:0005575 <1e-4 sl11053 G0:0017111 0.1094  
ssl2802 G0:0009309 <1e-4 sl11267 G0:0019752 <1e-4 sl11250 G0:0022803 <1e-4 slr7058 G0:0044424 <1e-4 sg10002 G0:0017111 0.1094  
slr6029 G0:0034660 <1e-4 slr5021 G0:0009309 <1e-4 sl15130 G0:0016818 <1e-4 slr0596 G0:0044422 <1e-4 sl10913 G0:0017111 0.1094  
slr1306 G0:0016053 <1e-4 ssl6062 G0:0006066 <1e-4 slr1210 G0:0016741 <1e-4 slr0602 G0:0044464 <1e-4 slr2118 G0:0017111 0.1094  
sl15109 G0:0008610 <1e-4 ssl0410 G0:0043436 <1e-4 slr0479 G0:0022836 <1e-4 slr0151 G0:0044424 <1e-4 ssl1004 G0:0017111 0.1094  
slr1114 G0:0006811 <1e-4 ssl2996 G0:0031323 <1e-4 sl10606 G0:0022832 <1e-4 slr2010 G0:0044444 <1e-4 sl11265 G0:0017111 0.1094  
slr0602 G0:0045184 <1e-4 slr0039 G0:0043436 <1e-4 slr1376 G0:0016741 <1e-4 sl11359 G0:0044425 <1e-4 slr1956 G0:0017111 0.1094  
sl10023 G0:0006811 <1e-4 sl11447 G0:0006793 <1e-4 sl11240 G0:0043167 <1e-4 slr1778 G0:0043226 <1e-4 slr0151 G0:0017111 0.1094  
ssl2065 G0:0009144 <1e-4 ssl2148 G0:0051818 <1e-4 sl10688 G0:0005342 <1e-4 slr2119 G0:0044425 <1e-4 slr7013 G0:0017111 0.1094  
slr0238 G0:0009056 <1e-4 ssl5096 G0:0009126 <1e-4 sl11509 G0:0015399 <1e-4 sl10925 G0:0005575 <1e-4 slr0505 G0:0017111 0.1094  
ssl5121 G0:0051246 <1e-4 sl11344 G0:0055114 <1e-4 slr1218 G0:0016746 <1e-4 slr0810 G0:0005575 <1e-4 sl10443 G0:0017111 0.1094  
ssl6078 G0:0071496 <1e-4 slr0887 G0:0051716 <1e-4 slr1363 G0:0016741 <1e-4 slr1101 G0:0044444 <1e-4 sl11025 G0:0017111 0.1094  
slr1570 G0:0071496 <1e-4 slr1616 G0:0022411 <1e-4 slr1215 G0:0015267 <1e-4 slr0358 G0:0005575 <1e-4 sl11109 G0:0017111 0.1094  
sl17090 G0:0048518 <1e-4 slr1315 G0:0044248 <1e-4 slr7023 G0:0022890 <1e-4 slr1827 G0:0044425 <1e-4 slr0380 G0:0017111 0.1094  
slr1362 G0:0016054 <1e-4 slr1462 G0:0034660 <1e-4 slr0333 G0:0060089 <1e-4 ssl2802 G0:0005575 <1e-4 slr5118 G0:0017111 0.1094  
sl10905 G0:0048523 <1e-4 ssl6002 G0:0016052 <1e-4 slr1258 G0:0022832 <1e-4 sl10419 G0:0044464 <1e-4 slr1660 G0:0017111 0.1094  
ssl3122 G0:0048522 <1e-4 slr1206 G0:0009123 <1e-4 ssl5011 G0:0015399 <1e-4 slr6014 G0:0044425 <1e-4 sl10863 G0:0017111 0.1094  
sl10910 G0:0009132 <1e-4 sl10811 G0:0009059 <1e-4 sl11424 G0:0022836 <1e-4 slr1070 G0:0005575 <1e-4 ssl3335 G0:0017111 0.1094  
slr1069 G0:0044283 <1e-4 sl10837 G0:0051179 <1e-4 slr1101 G0:0022832 <1e-4 slr0643 G0:0044422 <1e-4 sl10102 G0:0017111 0.1094  
sl10736 G0:0008150 <1e-4 sl10327 G0:0031326 <1e-4 sl10284 G0:0016746 <1e-4 ssl1766 G0:0044424 <1e-4 slr0606 G0:0017111 0.1094  
sl10857 G0:0006163 <1e-4 sl11640 G0:0065007 <1e-4 sl11399 G0:0016462 <1e-4 sl11570 G0:0044444 <1e-4 ssl2009 G0:0017111 0.1094  
sl10781 G0:0044271 <1e-4 sl15030 G0:0001932 <1e-4 ssl1552 G0:0016817 <1e-4 sl11252 G0:0044446 <1e-4 sl12015 G0:0017111 0.1094  
ssl3402 G0:0071554 <1e-4 slr0709 G0:0050801 <1e-4 slr1107 G0:0015399 <1e-4 slr1940 G0:0044424 <1e-4 slr1263 G0:0017111 0.1094  
sl10269 G0:0043549 <1e-4 slr1593 G0:0072524 <1e-4 slr1814 G0:0015267 <1e-4 slr0519 G0:0043226 <1e-4 sl10742 G0:0017111 0.1094  
sl11486 G0:0009893 <1e-4 slr0103 G0:0043549 <1e-4 sl11352 G0:0015267 <1e-4 ssl2009 G0:0005575 <1e-4 sl15061 G0:0017111 0.1094  
sl11424 G0:0072522 <1e-4 slr1069 G0:0006733 <1e-4 slr1568 G0:0022836 <1e-4 slr0689 G0:0005575 <1e-4 sl11217 G0:0017111 0.1094  
sl10584 G0:0048519 <1e-4 sl10157 G0:0006793 <1e-4 sl10793 G0:0015399 <1e-4 slr5116 G0:0043226 <1e-4 slr0581 G0:0017111 0.1094

|          |            |       |          |            |       |          |            |       |          |            |       |          |            |        |
|----------|------------|-------|----------|------------|-------|----------|------------|-------|----------|------------|-------|----------|------------|--------|
| slr0479  | G0:0019752 | <1e-4 | slr0505  | G0:0009199 | <1e-4 | sll1692  | G0:0043167 | <1e-4 | slr0270  | G0:0044422 | <1e-4 | slr6015  | G0:0017111 | 0.1094 |
| slr6028  | G0:0009991 | <1e-4 | sll0265  | G0:0051179 | <1e-4 | slr0607  | G0:0005342 | <1e-4 | ssl0410  | G0:0044444 | <1e-4 | sll17043 | G0:0017111 | 0.1094 |
| sll15034 | G0:0051347 | <1e-4 | slr0888  | G0:0050789 | <1e-4 | ssl1417  | G0:0015077 | <1e-4 | slr1241  | G0:0044425 | <1e-4 | sll10397 | G0:0017111 | 0.1094 |
| slr5126  | G0:0031326 | <1e-4 | sll10786 | G0:0090304 | <1e-4 | sm10011  | G0:0015291 | <1e-4 | slr2004  | G0:0044446 | <1e-4 | sll10168 | G0:0017111 | 0.1094 |
| slr1315  | G0:0051179 | <1e-4 | slr1187  | G0:0019752 | <1e-4 | sll10751 | G0:0015293 | <1e-4 | sll10608 | G0:0005575 | <1e-4 | slr1342  | G0:0017111 | 0.1094 |
| slr1235  | G0:0006066 | <1e-4 | slr1914  | G0:0048519 | <1e-4 | slr0959  | G0:0022890 | <1e-4 | sll1477  | G0:0005575 | <1e-4 | sll11203 | G0:0017111 | 0.1094 |
| slr1442  | G0:0045184 | <1e-4 | sll10191 | G0:0016052 | <1e-4 | slr1790  | G0:0043492 | <1e-4 | ssl1300  | G0:0044444 | <1e-4 | ssr1951  | G0:0017111 | 0.1094 |
| slr0317  | G0:0019637 | <1e-4 | sll11396 | G0:0071496 | <1e-4 | sll10590 | G0:0016741 | <1e-4 | slr0498  | G0:0044424 | <1e-4 | slr1270  | G0:0017111 | 0.1094 |
| ssr6083  | G0:0044282 | <1e-4 | sll17031 | G0:0045184 | <1e-4 | sll11573 | G0:0015267 | <1e-4 | slr0695  | G0:0044444 | <1e-4 | sll11396 | G0:0017111 | 0.1094 |
| sll10752 | G0:0006811 | <1e-4 | slr1266  | G0:0052188 | <1e-4 | slr0270  | G0:0043167 | <1e-4 | slr1107  | G0:0044444 | <1e-4 | slr7096  | G0:0017111 | 0.1094 |
| sll10047 | G0:0019362 | <1e-4 | slr1866  | G0:0006720 | <1e-4 | slr1240  | G0:0042623 | <1e-4 | sll15109 | G0:0043226 | <1e-4 | ssr6046  | G0:0017111 | 0.1094 |
| sll11504 | G0:0008150 | <1e-4 | sll10314 | G0:0044255 | <1e-4 | sll11656 | G0:0016818 | <1e-4 | ssl1045  | G0:0005575 | <1e-4 | sll10218 | G0:0017111 | 0.1094 |
| slr1161  | G0:0019222 | <1e-4 | slr1173  | G0:0050794 | <1e-4 | slr7012  | G0:0015077 | <1e-4 | slr0291  | G0:0044446 | <1e-4 | slr1276  | G0:0017111 | 0.1094 |
| sll10405 | G0:0009892 | <1e-4 | ssr3409  | G0:0009394 | <1e-4 | slr1413  | G0:0016462 | <1e-4 | sll11123 | G0:0044464 | <1e-4 | ssr2317  | G0:0017111 | 0.1094 |
| sll11239 | G0:0051234 | <1e-4 | ssl15129 | G0:0006721 | <1e-4 | sll10266 | G0:0022890 | <1e-4 | ssr6079  | G0:0044464 | <1e-4 | slr1863  | G0:0017111 | 0.1094 |
| slr1964  | G0:0006733 | <1e-4 | sll15004 | G0:0009991 | <1e-4 | slr1315  | G0:0022890 | <1e-4 | slr0351  | G0:0043226 | <1e-4 | slr6008  | G0:0017111 | 0.1094 |
| sll11640 | G0:0009161 | <1e-4 | slr1194  | G0:0051171 | <1e-4 | sll10328 | G0:0015293 | <1e-4 | sll11251 | G0:0044446 | <1e-4 | sll10853 | G0:0017111 | 0.1094 |
| slr0770  | G0:0043170 | <1e-4 | ssr2843  | G0:0034654 | <1e-4 | slr0408  | G0:0043492 | <1e-4 | sll10647 | G0:0005575 | <1e-4 | slr0870  | G0:0017111 | 0.1094 |
| sll10811 | G0:0009991 | <1e-4 | slr2073  | G0:0006753 | <1e-4 | slr1534  | G0:0016462 | <1e-4 | sll11455 | G0:0044425 | <1e-4 | slr7095  | G0:0017111 | 0.1094 |
| slr2105  | G0:0051347 | <1e-4 | slr0111  | G0:0046394 | <1e-4 | slr1207  | G0:0060089 | <1e-4 | slr1623  | G0:0044446 | <1e-4 | slr6006  | G0:0017111 | 0.1094 |
| sll11552 | G0:0043549 | <1e-4 | ssr0657  | G0:0055086 | <1e-4 | slr1450  | G0:0022892 | <1e-4 | slr1900  | G0:0005575 | <1e-4 | sll18033 | G0:0017111 | 0.1094 |
| sll11071 | G0:0022607 | <1e-4 | slr0971  | G0:0006811 | <1e-4 | sll10696 | G0:0016817 | <1e-4 | slr1437  | G0:0043226 | <1e-4 | slr0168  | G0:0017111 | 0.1094 |
| ssr2142  | G0:0009056 | <1e-4 | sll18027 | G0:0022607 | <1e-4 | ssl10109 | G0:0043167 | <1e-4 | sll11552 | G0:0044444 | <1e-4 | slr0142  | G0:0017111 | 0.1094 |
| sll10547 | G0:0009262 | <1e-4 | sll10572 | G0:0044255 | <1e-4 | ssr2972  | G0:0015077 | <1e-4 | sll10804 | G0:0005575 | <1e-4 | sll11960 | G0:0017111 | 0.1094 |
| sll11654 | G0:0006091 | <1e-4 | sll11052 | G0:0006721 | <1e-4 | ssr7017  | G0:0016818 | <1e-4 | sll11608 | G0:0044422 | <1e-4 | slr1472  | G0:0017111 | 0.1094 |
| sll11570 | G0:0044248 | <1e-4 | slr1261  | G0:0048518 | <1e-4 | sll15026 | G0:0016817 | <1e-4 | slr0812  | G0:0044446 | <1e-4 | slr7092  | G0:0017111 | 0.1094 |
| sll11389 | G0:0055082 | <1e-4 | slr2144  | G0:0006811 | <1e-4 | sll11025 | G0:0043167 | <1e-4 | slr6100  | G0:0044424 | <1e-4 | slr1813  | G0:0017111 | 0.1094 |
| slr0731  | G0:0071554 | <1e-4 | sll10448 | G0:0060255 | <1e-4 | slr0386  | G0:0022890 | <1e-4 | sll11638 | G0:0044446 | <1e-4 | slr1768  | G0:0017111 | 0.1094 |
| slr6021  | G0:0051171 | <1e-4 | sll10284 | G0:0052111 | <1e-4 | slr6101  | G0:0015293 | <1e-4 | slr0082  | G0:0044424 | <1e-4 | ssr6079  | G0:0017111 | 0.1094 |
| slr1183  | G0:0044275 | <1e-4 | sll10735 | G0:0072524 | <1e-4 | slr7081  | G0:0016741 | <1e-4 | slr1261  | G0:0043226 | <1e-4 | slr6004  | G0:0017111 | 0.1094 |
| sll10225 | G0:0006163 | <1e-4 | slr5119  | G0:0034641 | <1e-4 | sll11095 | G0:0015405 | <1e-4 | ssl7007  | G0:0005575 | <1e-4 | slr0049  | G0:0017111 | 0.1094 |
| ssl15129 | G0:0051171 | <1e-4 | slr0269  | G0:0009987 | <1e-4 | slr0516  | G0:0022892 | <1e-4 | sll11547 | G0:0044424 | <1e-4 | slr7014  | G0:0017111 | 0.1094 |
| ssr6048  | G0:0006766 | <1e-4 | sll11455 | G0:0006631 | <1e-4 | sll11784 | G0:0043167 | <1e-4 | ssl1498  | G0:0044446 | <1e-4 | slr1273  | G0:0017111 | 0.1094 |
| sll18007 | G0:0006163 | <1e-4 | sll17077 | G0:0006720 | <1e-4 | sll10175 | G0:0015291 | <1e-4 | ssr7072  | G0:0044464 | <1e-4 | slr7025  | G0:0017111 | 0.1094 |
| slr0144  | G0:0009124 | <1e-4 | sll11399 | G0:0050794 | <1e-4 | sll10810 | G0:0022892 | <1e-4 | slr0610  | G0:0044446 | <1e-4 | sll10658 | G0:0017111 | 0.1094 |
| slr5112  | G0:0009262 | <1e-4 | slr1187  | G0:0009262 | <1e-4 | sll10905 | G0:0008171 | <1e-4 | sll17066 | G0:0044446 | <1e-4 | sll17066 | G0:0017111 | 0.1094 |
| slr0269  | G0:0052188 | <1e-4 | ssl15007 | G0:0050794 | <1e-4 | slr0771  | G0:0022892 | <1e-4 | slr6067  | G0:0044422 | <1e-4 | sll18007 | G0:0017111 | 0.1094 |
| slr0728  | G0:0051347 | <1e-4 | sll10359 | G0:0071842 | <1e-4 | ssl0461  | G0:0016462 | <1e-4 | sll10327 | G0:0044422 | <1e-4 | sll10423 | G0:0017111 | 0.1094 |
| slr0207  | G0:0019222 | <1e-4 | slr1790  | G0:0031640 | <1e-4 | slr0668  | G0:0015405 | <1e-4 | sll10505 | G0:0044446 | <1e-4 | slr6064  | G0:0017111 | 0.1094 |
| slr2032  | G0:0044260 | <1e-4 | slr1600  | G0:0043170 | <1e-4 | slr0356  | G0:0016817 | <1e-4 | ssl15008 | G0:0044444 | <1e-4 | sll10406 | G0:0017111 | 0.1094 |
| sll15063 | G0:0050896 | <1e-4 | slr0157  | G0:0050794 | <1e-4 | sll10296 | G0:0016818 | <1e-4 | slr0386  | G0:0043226 | <1e-4 | slr6065  | G0:0017111 | 0.1094 |
| slr0937  | G0:0006732 | <1e-4 | slr1073  | G0:0009309 | <1e-4 | ssr6083  | G0:0003674 | <1e-4 | slr1690  | G0:0005575 | <1e-4 | slr0199  | G0:0017111 | 0.1094 |
| slr2110  | G0:0044275 | <1e-4 | sll11925 | G0:0009117 | <1e-4 | slr0552  | G0:0015405 | <1e-4 | sll10168 | G0:0044422 | <1e-4 | ssr6085  | G0:0017111 | 0.1094 |
| sll11186 | G0:0009991 | <1e-4 | slr0065  | G0:0006220 | <1e-4 | slr6008  | G0:0022857 | <1e-4 | sll10309 | G0:0044422 | <1e-4 | slr1397  | G0:0017111 | 0.1094 |
| slr1437  | G0:0072521 | <1e-4 | sll11247 | G0:0006793 | <1e-4 | sll10756 | G0:0016817 | <1e-4 | slr1814  | G0:0044444 | <1e-4 | slr0145  | G0:0017111 | 0.1094 |
| sll18007 | G0:0006082 | <1e-4 | slr1315  | G0:0046128 | <1e-4 | slr1290  | G0:0022832 | <1e-4 | slr0702  | G0:0044422 | <1e-4 | sll15046 | G0:0017111 | 0.1094 |
| slr2117  | G0:0006732 | <1e-4 | slr1940  | G0:0072527 | <1e-4 | slr0058  | G0:0008171 | <1e-4 | sll18011 | G0:0044446 | <1e-4 | ssl11792 | G0:0017111 | 0.1094 |
| ssl0294  | G0:0019752 | <1e-4 | ssl13379 | G0:0080090 | <1e-4 | sll10615 | G0:0022838 | <1e-4 | slr1050  | G0:0005575 | <1e-4 | slr5018  | G0:0017111 | 0.1094 |
| slr1570  | G0:0009057 | <1e-4 | sll10499 | G0:0048878 | <1e-4 | slr5118  | G0:0015291 | <1e-4 | slr1628  | G0:0044425 | <1e-4 | slr0960  | G0:0017111 | 0.1094 |
| slr0921  | G0:0009892 | <1e-4 | sll11239 | G0:0090304 | <1e-4 | sll10156 | G0:0005342 | <1e-4 | slr2042  | G0:0005575 | <1e-4 | slr1721  | G0:0017111 | 0.1094 |
| slr0712  | G0:0048878 | <1e-4 | slr1047  | G0:0006576 | <1e-4 | slr1177  | G0:0008171 | <1e-4 | slr6009  | G0:0044446 | <1e-4 | slr1907  | G0:0017111 | 0.1094 |
| sll11447 | G0:0051186 | <1e-4 | slr2032  | G0:0034641 | <1e-4 | sll11106 | G0:0015291 | <1e-4 | slr0458  | G0:0044444 | <1e-4 | ssl12471 | G0:0017111 | 0.1094 |
| slr2032  | G0:0009892 | <1e-4 | slr0914  | G0:0009141 | <1e-4 | slr1307  | G0:0016462 | <1e-4 | ssr1552  | G0:0044446 | <1e-4 | slr0784  | G0:0017111 | 0.1094 |
| sll10413 | G0:0045184 | <1e-4 | ssr3572  | G0:0031323 | <1e-4 | ssl13615 | G0:0015291 | <1e-4 | slr1376  | G0:0005575 | <1e-4 | sll10265 | G0:0017111 | 0.1094 |

|         |            |       |         |            |       |         |            |       |         |            |       |         |            |        |
|---------|------------|-------|---------|------------|-------|---------|------------|-------|---------|------------|-------|---------|------------|--------|
| s11891  | G0:0045184 | <1e-4 | s1r0285 | G0:0009117 | <1e-4 | s111174 | G0:0022857 | <1e-4 | s1r5116 | G0:0044444 | <1e-4 | ssr6032 | G0:0017111 | 0.1094 |
| s1r2092 | G0:0009199 | <1e-4 | s1r0607 | G0:0009987 | <1e-4 | s1r1083 | G0:0003674 | <1e-4 | s111738 | G0:0005575 | <1e-4 | s110762 | G0:0017111 | 0.1094 |
| s1r1799 | G0:0009199 | <1e-4 | s1r0400 | G0:0006720 | <1e-4 | ssr0332 | G0:0016462 | <1e-4 | s1r6015 | G0:0044425 | <1e-4 | s118002 | G0:0017111 | 0.1094 |
| s1r0521 | G0:0050896 | <1e-4 | s1r0505 | G0:0009126 | <1e-4 | s1r0865 | G0:0015293 | <1e-4 | s1r0181 | G0:0044422 | <1e-4 | s1r1179 | G0:0017111 | 0.1094 |
| s1r0852 | G0:0072522 | <1e-4 | s1r6080 | G0:0045184 | <1e-4 | s1r1896 | G0:0015399 | <1e-4 | ss11577 | G0:0044424 | <1e-4 | s111880 | G0:0017111 | 0.1094 |
| s1r0272 | G0:0048518 | <1e-4 | s1r1431 | G0:0010556 | <1e-4 | s110198 | G0:0015075 | <1e-4 | s111373 | G0:0043226 | <1e-4 | ss15129 | G0:0017111 | 0.1094 |
| s110857 | G0:0052111 | <1e-4 | s1r1959 | G0:0044106 | <1e-4 | s1r0103 | G0:0022832 | <1e-4 | s111874 | G0:0044424 | <1e-4 | s1r0146 | G0:0017111 | 0.1094 |
| s110980 | G0:0009262 | <1e-4 | s1r0238 | G0:0044003 | <1e-4 | ss15096 | G0:0015405 | <1e-4 | s1r1667 | G0:0044464 | <1e-4 | s111252 | G0:0017111 | 0.1094 |
| s1r1178 | G0:0006766 | <1e-4 | s1r1956 | G0:0006220 | <1e-4 | ssr2972 | G0:0016462 | <1e-4 | s111130 | G0:0005575 | <1e-4 | s111766 | G0:0017111 | 0.1094 |
| s1r0667 | G0:0034660 | <1e-4 | s111388 | G0:0006811 | <1e-4 | s110499 | G0:0015267 | <1e-4 | s1r0594 | G0:0005575 | <1e-4 | s110609 | G0:0017111 | 0.1094 |
| s111355 | G0:0009161 | <1e-4 | s110553 | G0:0008150 | <1e-4 | ss15113 | G0:0015267 | <1e-4 | s118019 | G0:0044444 | <1e-4 | s1r7080 | G0:0017111 | 0.1094 |
| s1r8022 | G0:0044275 | <1e-4 | s1r1670 | G0:0043436 | <1e-4 | s1r2118 | G0:0016818 | <1e-4 | s115044 | G0:0044425 | <1e-4 | s111389 | G0:0017111 | 0.1094 |
| ssr2554 | G0:0009132 | <1e-4 | s1r7100 | G0:0090304 | <1e-4 | s117087 | G0:0043167 | <1e-4 | s1r0479 | G0:0044422 | <1e-4 | ss10312 | G0:0017111 | 0.1094 |
| ss17038 | G0:0071842 | <1e-4 | s111318 | G0:0006766 | <1e-4 | s1r1854 | G0:0022836 | <1e-4 | s117070 | G0:0044424 | <1e-4 | s117064 | G0:0017111 | 0.1094 |
| s1r1415 | G0:0005996 | <1e-4 | s118019 | G0:0019751 | <1e-4 | s1r5037 | G0:0022838 | <1e-4 | s1r0935 | G0:0044446 | <1e-4 | s1r1419 | G0:0017111 | 0.1094 |
| s1r2119 | G0:0006721 | <1e-4 | sm10011 | G0:0042180 | <1e-4 | ss10352 | G0:0016741 | <1e-4 | ssr2009 | G0:0044425 | <1e-4 | s111511 | G0:0017111 | 0.1094 |
| s1r1530 | G0:0016052 | <1e-4 | s1r0325 | G0:0034660 | <1e-4 | s1r0397 | G0:0022838 | <1e-4 | s1r5077 | G0:0044446 | <1e-4 | s110810 | G0:0009058 | 0.1071 |
| s1r6016 | G0:0006733 | <1e-4 | s111390 | G0:0031640 | <1e-4 | ss17039 | G0:0016746 | <1e-4 | s115128 | G0:0044422 | <1e-4 | s110449 | G0:0009058 | 0.1071 |
| s1r1681 | G0:0009165 | <1e-4 | s111659 | G0:0009144 | <1e-4 | s110854 | G0:0008171 | <1e-4 | s1r0271 | G0:0044424 | <1e-4 | s1r0801 | G0:0009058 | 0.1071 |
| s1r1339 | G0:0009123 | <1e-4 | s1r0058 | G0:0046394 | <1e-4 | ss10832 | G0:0043167 | <1e-4 | ssr2611 | G0:0044425 | <1e-4 | s1r1122 | G0:0009058 | 0.1071 |
| s1r1419 | G0:0051234 | <1e-4 | s1r2080 | G0:0033013 | <1e-4 | s111763 | G0:0022892 | <1e-4 | s110688 | G0:0005575 | <1e-4 | s1r1809 | G0:0009058 | 0.1071 |
| s1r6066 | G0:0043436 | <1e-4 | s1r0145 | G0:0006721 | <1e-4 | s110525 | G0:0022803 | <1e-4 | ssr0657 | G0:0044422 | <1e-4 | s111730 | G0:0009058 | 0.1071 |
| s1r6051 | G0:0031640 | <1e-4 | s1r2038 | G0:0055082 | <1e-4 | s1r0695 | G0:0015405 | <1e-4 | s110148 | G0:0044424 | <1e-4 | s1r1940 | G0:0009058 | 0.1071 |
| s1r0654 | G0:0005996 | <1e-4 | s1r6068 | G0:0051246 | <1e-4 | s110740 | G0:0008171 | <1e-4 | s110888 | G0:0044424 | <1e-4 | s1r1413 | G0:0009058 | 0.1071 |
| ss10109 | G0:0006811 | <1e-4 | s1r6009 | G0:0072527 | <1e-4 | ssr0536 | G0:0043492 | <1e-4 | s1r0157 | G0:0044422 | <1e-4 | s111956 | G0:0009058 | 0.1071 |
| s1r6101 | G0:0051818 | <1e-4 | s1r0149 | G0:0006766 | <1e-4 | s1r1207 | G0:0022803 | <1e-4 | s1r1601 | G0:0044446 | <1e-4 | s110503 | G0:0009058 | 0.1071 |
| s110397 | G0:0009893 | <1e-4 | s1r1721 | G0:0051186 | <1e-4 | s1r6004 | G0:0016818 | <1e-4 | s110242 | G0:0044444 | <1e-4 | s1r0249 | G0:0009058 | 0.1071 |
| s1r0598 | G0:0019752 | <1e-4 | ss12996 | G0:0019362 | <1e-4 | s1r1262 | G0:0060089 | <1e-4 | s1r0876 | G0:0044444 | <1e-4 | s110268 | G0:0009058 | 0.1071 |
| s111472 | G0:0042455 | <1e-4 | s1r5087 | G0:0006733 | <1e-4 | s1r1923 | G0:0016741 | <1e-4 | s1r0913 | G0:0044422 | <1e-4 | s110688 | G0:0009058 | 0.1071 |
| s110242 | G0:0044275 | <1e-4 | s110910 | G0:0071842 | <1e-4 | s110147 | G0:0016741 | <1e-4 | s110236 | G0:0044446 | <1e-4 | ss18008 | G0:0009058 | 0.1071 |
| s1r0787 | G0:0019637 | <1e-4 | s1r1034 | G0:0018130 | <1e-4 | s110508 | G0:0015291 | <1e-4 | s117050 | G0:0005575 | <1e-4 | s1r0650 | G0:0009058 | 0.1071 |
| ss12717 | G0:0034654 | <1e-4 | s1r7098 | G0:0034660 | <1e-4 | s1r0082 | G0:0016818 | <1e-4 | s111424 | G0:0044422 | <1e-4 | s1r1053 | G0:0009058 | 0.1071 |
| s1r0551 | G0:0051171 | <1e-4 | ss10353 | G0:0051188 | <1e-4 | s1r2032 | G0:0008171 | <1e-4 | s111135 | G0:0044424 | <1e-4 | s1r1977 | G0:0009058 | 0.1071 |
| s110647 | G0:0051186 | <1e-4 | s117090 | G0:0051716 | <1e-4 | ssr1114 | G0:0022857 | <1e-4 | ssr7084 | G0:0044444 | <1e-4 | s1r1852 | G0:0009058 | 0.1071 |
| s1r5023 | G0:0006066 | <1e-4 | s1r1340 | G0:0072528 | <1e-4 | s1r1235 | G0:0060089 | <1e-4 | s111691 | G0:0044446 | <1e-4 | ssr3300 | G0:0009058 | 0.1071 |
| s110525 | G0:0022411 | <1e-4 | ss15015 | G0:0043933 | <1e-4 | s1r6100 | G0:0022803 | <1e-4 | s111318 | G0:0044464 | <1e-4 | s1r2005 | G0:0009058 | 0.1071 |
| s1r0708 | G0:0005996 | <1e-4 | s1r2117 | G0:0051171 | <1e-4 | s110727 | G0:0043492 | <1e-4 | s115033 | G0:0044422 | <1e-4 | s1r0962 | G0:0009058 | 0.1071 |
| s110265 | G0:0009117 | <1e-4 | ssr6078 | G0:0019222 | <1e-4 | s1r1628 | G0:0022857 | <1e-4 | s110981 | G0:0044464 | <1e-4 | s111873 | G0:0009058 | 0.1071 |
| s1r0211 | G0:0006066 | <1e-4 | s1r1187 | G0:0060255 | <1e-4 | s1r0742 | G0:0022892 | <1e-4 | ss15068 | G0:0005575 | <1e-4 | s1r1827 | G0:0009058 | 0.1071 |
| s1r0865 | G0:0006793 | <1e-4 | s1r0670 | G0:0009132 | <1e-4 | s1r1811 | G0:0016462 | <1e-4 | s110335 | G0:0044424 | <1e-4 | s111640 | G0:0005488 | 0.1066 |
| s1r1819 | G0:0016052 | <1e-4 | s1r1896 | G0:0080090 | <1e-4 | s111109 | G0:0015399 | <1e-4 | s111433 | G0:0044464 | <1e-4 | s110335 | G0:0005488 | 0.1066 |
| s1r1699 | G0:0048519 | <1e-4 | s1r1790 | G0:0080090 | <1e-4 | s111862 | G0:0043167 | <1e-4 | s1r1307 | G0:0044444 | <1e-4 | s116055 | G0:0005488 | 0.1066 |
| ss10739 | G0:0042180 | <1e-4 | s1r0976 | G0:0046128 | <1e-4 | s111068 | G0:0043167 | <1e-4 | s111424 | G0:0044444 | <1e-4 | ss17051 | G0:0005488 | 0.1066 |
| s1r1505 | G0:0034660 | <1e-4 | s1r1071 | G0:0009308 | <1e-4 | s110658 | G0:0015293 | <1e-4 | s1r0386 | G0:0044425 | <1e-4 | s1r1875 | G0:0005488 | 0.1066 |
| s111186 | G0:0009123 | <1e-4 | s1r0935 | G0:0071840 | <1e-4 | ss12009 | G0:0015267 | <1e-4 | s1r1505 | G0:0044425 | <1e-4 | s110047 | G0:0005488 | 0.1066 |
| s117070 | G0:0043412 | <1e-4 | s1r0695 | G0:0005996 | <1e-4 | s111254 | G0:0015267 | <1e-4 | s1r0050 | G0:0044446 | <1e-4 | s111926 | G0:0005488 | 0.1066 |
| s110661 | G0:0044003 | <1e-4 | s1r0060 | G0:0042451 | <1e-4 | s110763 | G0:0022838 | <1e-4 | s110688 | G0:0044444 | <1e-4 | s110858 | G0:0005488 | 0.1066 |
| s1r1084 | G0:0008150 | <1e-4 | s1r0865 | G0:0006066 | <1e-4 | s1r1307 | G0:0022836 | <1e-4 | s110473 | G0:0044446 | <1e-4 | s110543 | G0:0005488 | 0.1066 |
| s111913 | G0:0042180 | <1e-4 | s1r5111 | G0:0006082 | <1e-4 | s1r0552 | G0:0016746 | <1e-4 | s1r0812 | G0:0044464 | <1e-4 | ssr2318 | G0:0005488 | 0.1066 |
| s110479 | G0:0019752 | <1e-4 | s1r0192 | G0:0044283 | <1e-4 | ss17042 | G0:0015293 | <1e-4 | s1r1944 | G0:0044464 | <1e-4 | s1r7073 | G0:0005488 | 0.1066 |
| s1r1301 | G0:0006220 | <1e-4 | s110565 | G0:0046128 | <1e-4 | s1r1101 | G0:0022892 | <1e-4 | s1r1577 | G0:0044446 | <1e-4 | ss15091 | G0:0005488 | 0.1066 |
| s110931 | G0:0052111 | <1e-4 | s110473 | G0:0046164 | <1e-4 | s110909 | G0:0016817 | <1e-4 | ss10109 | G0:0005575 | <1e-4 | ss12064 | G0:0005488 | 0.1066 |
| ssr6062 | G0:0009308 | <1e-4 | s1r2005 | G0:0006066 | <1e-4 | s1r0810 | G0:0022892 | <1e-4 | s1r2032 | G0:0005575 | <1e-4 | s111142 | G0:0005488 | 0.1066 |
| s1r0598 | G0:0034641 | <1e-4 | s111965 | G0:0043436 | <1e-4 | s1r7011 | G0:0016818 | <1e-4 | s115004 | G0:0044446 | <1e-4 | ssr0761 | G0:0005488 | 0.1066 |

|         |            |       |         |            |       |         |            |       |         |            |       |         |            |        |
|---------|------------|-------|---------|------------|-------|---------|------------|-------|---------|------------|-------|---------|------------|--------|
| slr0376 | G0:0019751 | <1e-4 | sl10447 | G0:0019362 | <1e-4 | ssr2803 | G0:0015293 | <1e-4 | sl11429 | G0:0044422 | <1e-4 | sl17031 | G0:0005488 | 0.1066 |
| slr7080 | G0:0009987 | <1e-4 | slr0912 | G0:0009117 | <1e-4 | slr0598 | G0:0005342 | <1e-4 | ss15129 | G0:0044444 | <1e-4 | slr5037 | G0:0005488 | 0.1066 |
| ssr7084 | G0:0042180 | <1e-4 | slr0613 | G0:0019362 | <1e-4 | sl10478 | G0:0022890 | <1e-4 | slr2110 | G0:0044422 | <1e-4 | sl10372 | G0:0005488 | 0.1066 |
| slr1484 | G0:0051246 | <1e-4 | sl11571 | G0:0051246 | <1e-4 | ss11004 | G0:0015405 | <1e-4 | sl11761 | G0:0044425 | <1e-4 | slr5111 | G0:0005488 | 0.1066 |
| sl11315 | G0:0009123 | <1e-4 | sl11218 | G0:0008610 | <1e-4 | ss17007 | G0:0043167 | <1e-4 | slr0211 | G0:0044444 | <1e-4 | slr5013 | G0:0005488 | 0.1066 |
| slr0325 | G0:0050896 | <1e-4 | slr1767 | G0:0006576 | <1e-4 | slr7073 | G0:0043492 | <1e-4 | ss10738 | G0:0043226 | <1e-4 | ssr0109 | G0:0005488 | 0.1066 |
| slr1025 | G0:0009199 | <1e-4 | slr1865 | G0:0055082 | <1e-4 | sl11252 | G0:0015077 | <1e-4 | sl11858 | G0:0044444 | <1e-4 | slr1807 | G0:0005488 | 0.1066 |
| slr1601 | G0:0050789 | <1e-4 | sl10479 | G0:0009987 | <1e-4 | slr1398 | G0:0042623 | <1e-4 | slr0845 | G0:0005575 | <1e-4 | sl11373 | G0:0005488 | 0.1066 |
| slr6100 | G0:0006082 | <1e-4 | slr1363 | G0:0046907 | <1e-4 | ss11520 | G0:0022836 | <1e-4 | sl11130 | G0:0043226 | <1e-4 | slr1704 | G0:0005488 | 0.1066 |
| sl10167 | G0:0009126 | <1e-4 | sl11247 | G0:0009991 | <1e-4 | sl10608 | G0:0022832 | <1e-4 | slr1194 | G0:0044425 | <1e-4 | slr0712 | G0:0005488 | 0.1066 |
| sl10071 | G0:0022607 | <1e-4 | ssr2615 | G0:0009057 | <1e-4 | sl11424 | G0:0015077 | <1e-4 | sl11192 | G0:0044444 | <1e-4 | slr5112 | G0:0005488 | 0.1066 |
| slr1914 | G0:0009132 | <1e-4 | slr1699 | G0:0055114 | <1e-4 | slr1495 | G0:0042623 | <1e-4 | ss11004 | G0:0044446 | <1e-4 | ssr7093 | G0:0005488 | 0.1066 |
| sl11531 | G0:0044003 | <1e-4 | slr1429 | G0:0006576 | <1e-4 | slr0887 | G0:0015293 | <1e-4 | sl10176 | G0:0044446 | <1e-4 | sl17087 | G0:0005488 | 0.1066 |
| sl11476 | G0:0051716 | <1e-4 | sl10563 | G0:0006733 | <1e-4 | ss17074 | G0:0022832 | <1e-4 | sl11505 | G0:0044424 | <1e-4 | sl11321 | G0:0005488 | 0.1066 |
| sl10007 | G0:0022607 | <1e-4 | slr1222 | G0:0043549 | <1e-4 | ss10738 | G0:0016817 | <1e-4 | ss13573 | G0:0044424 | <1e-4 | sl11717 | G0:0005488 | 0.1066 |
| ss10294 | G0:0009263 | <1e-4 | sl10702 | G0:0034654 | <1e-4 | sl10284 | G0:0015405 | <1e-4 | slr7082 | G0:0044425 | <1e-4 | sl10062 | G0:0005488 | 0.1066 |
| sl11630 | G0:0006631 | <1e-4 | sl11765 | G0:0034660 | <1e-4 | slr1627 | G0:0016817 | <1e-4 | ss17022 | G0:0005575 | <1e-4 | sl11882 | G0:0005488 | 0.1066 |
| slr6065 | G0:0071842 | <1e-4 | ss12384 | G0:0043549 | <1e-4 | sl11380 | G0:0022836 | <1e-4 | ss10738 | G0:0044422 | <1e-4 | ss11690 | G0:0005488 | 0.1066 |
| ssr1499 | G0:0071496 | <1e-4 | ss10461 | G0:0019222 | <1e-4 | slr6100 | G0:0015267 | <1e-4 | ss15114 | G0:0044464 | <1e-4 | ss17038 | G0:0005488 | 0.1066 |
| ss11255 | G0:0048523 | <1e-4 | slr1270 | G0:0051716 | <1e-4 | slr0262 | G0:0015077 | <1e-4 | sl17086 | G0:0044464 | <1e-4 | ss17042 | G0:0005488 | 0.1066 |
| sl11873 | G0:0008150 | <1e-4 | sl11389 | G0:0044255 | <1e-4 | ss18008 | G0:0016741 | <1e-4 | slr1674 | G0:0044446 | <1e-4 | sl11573 | G0:0005488 | 0.1066 |
| sl10479 | G0:0055086 | <1e-4 | slr2110 | G0:0009144 | <1e-4 | sl10449 | G0:0022890 | <1e-4 | sl10743 | G0:0044464 | <1e-4 | slr0651 | G0:0005488 | 0.1066 |
| slr0619 | G0:0034641 | <1e-4 | slr0514 | G0:0006066 | <1e-4 | slr1275 | G0:0015293 | <1e-4 | ssr6079 | G0:0005575 | <1e-4 | slr0588 | G0:0005488 | 0.1066 |
| ss11918 | G0:0033013 | <1e-4 | sl11289 | G0:0019752 | <1e-4 | ssr2047 | G0:0042623 | <1e-4 | slr1638 | G0:0005575 | <1e-4 | slr0270 | G0:0005488 | 0.1066 |
| slr0263 | G0:0006811 | <1e-4 | ss18028 | G0:0016053 | <1e-4 | slr1814 | G0:0015077 | <1e-4 | ss10353 | G0:0043226 | <1e-4 | sl10031 | G0:0005488 | 0.1066 |
| ssr2975 | G0:0071840 | <1e-4 | sl10354 | G0:0006811 | <1e-4 | ss13549 | G0:0016462 | <1e-4 | sl10478 | G0:0044425 | <1e-4 | slr1951 | G0:0005488 | 0.1066 |
| sl10558 | G0:0080090 | <1e-4 | slr0708 | G0:0051234 | <1e-4 | sl16055 | G0:0043167 | <1e-4 | slr0960 | G0:0044424 | <1e-4 | ss12069 | G0:0005488 | 0.1066 |
| slr0103 | G0:0006721 | <1e-4 | slr0870 | G0:0050794 | <1e-4 | slr1107 | G0:0016741 | <1e-4 | ssr0657 | G0:0044425 | <1e-4 | slr1570 | G0:0005488 | 0.1066 |
| ss15008 | G0:0022607 | <1e-4 | sl11511 | G0:0008610 | <1e-4 | sl11527 | G0:0005342 | <1e-4 | slr1117 | G0:0044446 | <1e-4 | ssr1558 | G0:0005488 | 0.1066 |
| slr1935 | G0:0008150 | <1e-4 | slr1790 | G0:0009142 | <1e-4 | slr5013 | G0:0016818 | <1e-4 | slr7014 | G0:0044444 | <1e-4 | slr1425 | G0:0005488 | 0.1066 |
| slr1900 | G0:0071840 | <1e-4 | slr1082 | G0:0022411 | <1e-4 | sl10614 | G0:0015399 | <1e-4 | slr0404 | G0:0044446 | <1e-4 | slr1737 | G0:0005488 | 0.1066 |
| ssr6030 | G0:0006732 | <1e-4 | sl11530 | G0:0019637 | <1e-4 | slr6074 | G0:0022836 | <1e-4 | slr0723 | G0:0044425 | <1e-4 | slr7100 | G0:0005488 | 0.1066 |
| slr7080 | G0:0042455 | <1e-4 | slr1862 | G0:0016054 | <1e-4 | slr1767 | G0:0043492 | <1e-4 | slr1073 | G0:0044422 | <1e-4 | ss17022 | G0:0005488 | 0.1066 |
| sl10167 | G0:0042455 | <1e-4 | sl11049 | G0:0050801 | <1e-4 | sl15089 | G0:0008171 | <1e-4 | slr1047 | G0:0044446 | <1e-4 | slr0181 | G0:0005488 | 0.1066 |
| slr1885 | G0:0006066 | <1e-4 | sl11583 | G0:0009991 | <1e-4 | slr7092 | G0:0022857 | <1e-4 | slr1847 | G0:0005575 | <1e-4 | sl11911 | G0:0005488 | 0.1066 |
| ssr2754 | G0:0019751 | <1e-4 | slr0505 | G0:0009309 | <1e-4 | ssr2201 | G0:0015267 | <1e-4 | slr7024 | G0:0044444 | <1e-4 | slr0976 | G0:0005488 | 0.1066 |
| sl15063 | G0:0042180 | <1e-4 | sl10815 | G0:0050794 | <1e-4 | slr1107 | G0:0015267 | <1e-4 | sl11692 | G0:0005575 | <1e-4 | sl10736 | G0:0005488 | 0.1066 |
| sl11321 | G0:0009124 | <1e-4 | slr1819 | G0:0071842 | <1e-4 | sl18011 | G0:0016741 | <1e-4 | slr1927 | G0:0043226 | <1e-4 | sl11233 | G0:0005488 | 0.1066 |
| slr1721 | G0:0044255 | <1e-4 | ss11552 | G0:0019222 | <1e-4 | slr1261 | G0:0016462 | <1e-4 | slr6033 | G0:0044444 | <1e-4 | slr0345 | G0:0005488 | 0.1066 |
| sl11106 | G0:0046164 | <1e-4 | ss10312 | G0:0072521 | <1e-4 | sl10265 | G0:0016817 | <1e-4 | sl10760 | G0:0044425 | <1e-4 | ss15100 | G0:0005488 | 0.1066 |
| slr6005 | G0:0072528 | <1e-4 | slr0740 | G0:0018130 | <1e-4 | slr0431 | G0:0015077 | <1e-4 | ssr1407 | G0:0044464 | <1e-4 | ss15008 | G0:0005488 | 0.1066 |
| sl15034 | G0:0044255 | <1e-4 | sl11162 | G0:0009260 | <1e-4 | sl15089 | G0:0022803 | <1e-4 | sl11530 | G0:0044444 | <1e-4 | ssr6099 | G0:0005488 | 0.1066 |
| slr2071 | G0:0006066 | <1e-4 | slr0770 | G0:0009141 | <1e-4 | slr1097 | G0:0022892 | <1e-4 | sl17063 | G0:0005575 | <1e-4 | ssr6086 | G0:0005488 | 0.1066 |
| slr0656 | G0:0051818 | <1e-4 | sl11399 | G0:0009260 | <1e-4 | sl10827 | G0:0022836 | <1e-4 | slr1327 | G0:0044425 | <1e-4 | sl11158 | G0:0005488 | 0.1066 |
| sl11239 | G0:0051171 | <1e-4 | slr1767 | G0:0048518 | <1e-4 | sl10505 | G0:0043492 | <1e-4 | sl10355 | G0:0044425 | <1e-4 | sl11702 | G0:0005488 | 0.1066 |
| sl11681 | G0:0046394 | <1e-4 | slr0602 | G0:0031326 | <1e-4 | ssr2553 | G0:0016817 | <1e-4 | sl11319 | G0:0044425 | <1e-4 | slr0967 | G0:0005488 | 0.1066 |
| sl11219 | G0:0019637 | <1e-4 | sl10930 | G0:0009889 | <1e-4 | ssr2009 | G0:0022857 | <1e-4 | ss11918 | G0:0044444 | <1e-4 | sl18040 | G0:0005488 | 0.1066 |
| sl11832 | G0:0009132 | <1e-4 | slr0489 | G0:0009259 | <1e-4 | slr1342 | G0:0016817 | <1e-4 | slr0208 | G0:0005575 | <1e-4 | slr1990 | G0:0005488 | 0.1066 |
| ssr1258 | G0:0019362 | <1e-4 | ss11417 | G0:0065007 | <1e-4 | slr1726 | G0:0016746 | <1e-4 | slr1236 | G0:0044424 | <1e-4 | slr0238 | G0:0005488 | 0.1066 |
| sl10325 | G0:0042451 | <1e-4 | slr0869 | G0:0051188 | <1e-4 | ssr6002 | G0:0022803 | <1e-4 | slr2101 | G0:0005575 | <1e-4 | ssr6089 | G0:0005488 | 0.1066 |
| slr0211 | G0:0009259 | <1e-4 | sl10168 | G0:0046483 | <1e-4 | sl11321 | G0:0015077 | <1e-4 | sl11761 | G0:0044464 | <1e-4 | ssr2975 | G0:0005488 | 0.1066 |
| slr6008 | G0:0044106 | <1e-4 | sl10933 | G0:0009262 | <1e-4 | ssr3571 | G0:0008171 | <1e-4 | slr1668 | G0:0044446 | <1e-4 | slr0755 | G0:0005488 | 0.1066 |
| ss15113 | G0:0050789 | <1e-4 | slr0400 | G0:0042451 | <1e-4 | ss13573 | G0:0022838 | <1e-4 | sl11925 | G0:0005575 | <1e-4 | sl11068 | G0:0005488 | 0.1066 |
| sl11002 | G0:0009263 | <1e-4 | sl11272 | G0:0006721 | <1e-4 | slr0569 | G0:0003674 | <1e-4 | slr1438 | G0:0044422 | <1e-4 | slr1886 | G0:0005488 | 0.1066 |

|         |            |       |          |            |       |         |            |       |         |            |       |         |            |        |
|---------|------------|-------|----------|------------|-------|---------|------------|-------|---------|------------|-------|---------|------------|--------|
| ssr3300 | G0:0005996 | <1e-4 | slr1726  | G0:0048523 | <1e-4 | slr6074 | G0:0016746 | <1e-4 | slr6057 | G0:0005575 | <1e-4 | slr1577 | G0:0005488 | 0.1066 |
| slr0364 | G0:0043549 | <1e-4 | ssl2069  | G0:0022607 | <1e-4 | slr1814 | G0:0042623 | <1e-4 | sl11267 | G0:0044425 | <1e-4 | ssr2802 | G0:0005488 | 0.1066 |
| sl10751 | G0:0006091 | <1e-4 | slr6073  | G0:0044003 | <1e-4 | sl10781 | G0:0016462 | <1e-4 | sl10743 | G0:0044422 | <1e-4 | sl10625 | G0:0005488 | 0.1066 |
| slr2084 | G0:0042455 | <1e-4 | sl11853  | G0:0019362 | <1e-4 | sl10496 | G0:0015293 | <1e-4 | slr1813 | G0:0005575 | <1e-4 | slr1670 | G0:0005488 | 0.1066 |
| slr1657 | G0:0043412 | <1e-4 | slr1303  | G0:0048522 | <1e-4 | ss10788 | G0:0008171 | <1e-4 | slr1718 | G0:0044424 | <1e-4 | slr5127 | G0:0005488 | 0.1066 |
| ssr0336 | G0:0044283 | <1e-4 | sl11054  | G0:0043170 | <1e-4 | sl11447 | G0:0015405 | <1e-4 | sl15069 | G0:0044446 | <1e-4 | sl11036 | G0:0005488 | 0.1066 |
| ssr1425 | G0:0009991 | <1e-4 | sl117055 | G0:0048519 | <1e-4 | ssr2554 | G0:0016817 | <1e-4 | slr2025 | G0:0005575 | <1e-4 | ssr6030 | G0:0005488 | 0.1066 |
| ss10483 | G0:0044248 | <1e-4 | sl10397  | G0:0051188 | <1e-4 | ss17022 | G0:0022832 | <1e-4 | sl11500 | G0:0044424 | <1e-4 | slr0291 | G0:0005488 | 0.1066 |
| sl11714 | G0:0009132 | <1e-4 | sl11660  | G0:0072528 | <1e-4 | sl10103 | G0:0022803 | <1e-4 | slr1913 | G0:0044422 | <1e-4 | sl10565 | G0:0005488 | 0.1066 |
| slr0149 | G0:0052188 | <1e-4 | sl15004  | G0:0071842 | <1e-4 | slr0168 | G0:0022836 | <1e-4 | slr0885 | G0:0005575 | <1e-4 | sl10552 | G0:0005488 | 0.1066 |
| slr0291 | G0:0051716 | <1e-4 | slr2144  | G0:0019752 | <1e-4 | sl11219 | G0:0003674 | <1e-4 | sl10156 | G0:0044425 | <1e-4 | ss11918 | G0:0005488 | 0.1066 |
| slr8044 | G0:0034641 | <1e-4 | slr0810  | G0:0008610 | <1e-4 | ss15103 | G0:0022890 | <1e-4 | sl11862 | G0:0044444 | <1e-4 | slr0326 | G0:0005488 | 0.1066 |
| sl11021 | G0:0019222 | <1e-4 | slr1474  | G0:0055082 | <1e-4 | slr1073 | G0:0043492 | <1e-4 | sl10857 | G0:0044444 | <1e-4 | slr1819 | G0:0005488 | 0.1066 |
| slr1033 | G0:0009057 | <1e-4 | slr1816  | G0:0008150 | <1e-4 | sl15132 | G0:0005342 | <1e-4 | slr1070 | G0:0044425 | <1e-4 | sl11388 | G0:0005488 | 0.1066 |
| ssl2749 | G0:0051716 | <1e-4 | sl11201  | G0:0034660 | <1e-4 | sl11570 | G0:0016741 | <1e-4 | slr1964 | G0:0044422 | <1e-4 | slr2103 | G0:0005488 | 0.1066 |
| sl15097 | G0:0006793 | <1e-4 | slr0273  | G0:0008150 | <1e-4 | ssr8013 | G0:0015399 | <1e-4 | slr1577 | G0:0043226 | <1e-4 | ss18039 | G0:0005488 | 0.1066 |
| sl11660 | G0:0009059 | <1e-4 | slr0596  | G0:0050789 | <1e-4 | slr1648 | G0:0022892 | <1e-4 | sl11476 | G0:0044464 | <1e-4 | slr0948 | G0:0005488 | 0.1066 |
| sl10837 | G0:0044271 | <1e-4 | slr0582  | G0:0043436 | <1e-4 | sl11891 | G0:0015075 | <1e-4 | slr0458 | G0:0044424 | <1e-4 | slr1438 | G0:0005488 | 0.1066 |
| slr6087 | G0:0044281 | <1e-4 | ssl2065  | G0:0009161 | <1e-4 | sl10446 | G0:0022892 | <1e-4 | sl10737 | G0:0044446 | <1e-4 | slr0885 | G0:0005488 | 0.1066 |
| sl11880 | G0:0006066 | <1e-4 | sl11659  | G0:0009309 | <1e-4 | sl11634 | G0:0015075 | <1e-4 | slr1084 | G0:0044444 | <1e-4 | sl10496 | G0:0005488 | 0.1066 |
| sl10478 | G0:0046394 | <1e-4 | sl10068  | G0:0006811 | <1e-4 | sl10328 | G0:0016462 | <1e-4 | ssr7072 | G0:0005575 | <1e-4 | sl11834 | G0:0005488 | 0.1066 |
| slr0771 | G0:0031323 | <1e-4 | sl11630  | G0:0009132 | <1e-4 | slr1470 | G0:0016462 | <1e-4 | slr0509 | G0:0044424 | <1e-4 | slr2000 | G0:0005488 | 0.1066 |
| ssr6078 | G0:0046164 | <1e-4 | slr1927  | G0:0008610 | <1e-4 | slr0818 | G0:0003674 | <1e-4 | ssl2138 | G0:0044422 | <1e-4 | slr6087 | G0:0005488 | 0.1066 |
| slr1384 | G0:0048519 | <1e-4 | slr5077  | G0:0006066 | <1e-4 | sl15003 | G0:0022838 | <1e-4 | slr1812 | G0:0043226 | <1e-4 | slr0397 | G0:0005488 | 0.1066 |
| slr0921 | G0:0044260 | <1e-4 | slr1183  | G0:0009142 | <1e-4 | slr1863 | G0:0015293 | <1e-4 | slr6033 | G0:0044464 | <1e-4 | slr6033 | G0:0005488 | 0.1066 |
| ssr7036 | G0:0034654 | <1e-4 | sl11389  | G0:0072522 | <1e-4 | slr1704 | G0:0022890 | <1e-4 | slr0962 | G0:0044424 | <1e-4 | slr0863 | G0:0005488 | 0.1066 |
| sl16052 | G0:0009117 | <1e-4 | slr6065  | G0:0009987 | <1e-4 | slr0519 | G0:0015291 | <1e-4 | slr1376 | G0:0044444 | <1e-4 | sl11979 | G0:0005488 | 0.1066 |
| sl11464 | G0:0009117 | <1e-4 | slr0871  | G0:0071496 | <1e-4 | sl10098 | G0:0016741 | <1e-4 | sl11766 | G0:0043226 | <1e-4 | slr0453 | G0:0005488 | 0.1066 |
| sl10661 | G0:0071554 | <1e-4 | sl11464  | G0:0072521 | <1e-4 | slr1546 | G0:0022838 | <1e-4 | slr1343 | G0:0044425 | <1e-4 | sl11583 | G0:0005488 | 0.1066 |
| slr1935 | G0:0009262 | <1e-4 | sl11025  | G0:0009308 | <1e-4 | slr0398 | G0:0016746 | <1e-4 | slr1186 | G0:0044424 | <1e-4 | slr2071 | G0:0005488 | 0.1066 |
| sl11531 | G0:0009263 | <1e-4 | sl10071  | G0:0043170 | <1e-4 | slr1851 | G0:0022857 | <1e-4 | ssr8013 | G0:0005575 | <1e-4 | sl10160 | G0:0005488 | 0.1066 |
| slr0468 | G0:0008150 | <1e-4 | slr1438  | G0:0048518 | <1e-4 | slr7091 | G0:0003674 | <1e-4 | slr0503 | G0:0044425 | <1e-4 | ssr5106 | G0:0005488 | 0.1066 |
| sl11068 | G0:0051179 | <1e-4 | ssl1004  | G0:0006082 | <1e-4 | slr0765 | G0:0022890 | <1e-4 | sl10837 | G0:0044446 | <1e-4 | slr0516 | G0:0005488 | 0.1066 |
| slr1150 | G0:0008150 | <1e-4 | sl12015  | G0:0055114 | <1e-4 | sl11912 | G0:0016818 | <1e-4 | sl11722 | G0:0044464 | <1e-4 | sl10172 | G0:0005488 | 0.1066 |
| slr0503 | G0:0006220 | <1e-4 | ssl1464  | G0:0072524 | <1e-4 | sl10031 | G0:0022803 | <1e-4 | sl11267 | G0:0044444 | <1e-4 | sl17050 | G0:0005488 | 0.1066 |
| slr1774 | G0:0045184 | <1e-4 | sl11608  | G0:0050896 | <1e-4 | ss13451 | G0:0016817 | <1e-4 | ssr7084 | G0:0005575 | <1e-4 | slr1056 | G0:0005488 | 0.1066 |
| slr7094 | G0:0044281 | <1e-4 | slr6090  | G0:0055114 | <1e-4 | sl11692 | G0:0022803 | <1e-4 | sl10149 | G0:0044425 | <1e-4 | ss17048 | G0:0005488 | 0.1066 |
| sl11265 | G0:0019637 | <1e-4 | slr1394  | G0:0009142 | <1e-4 | slr1142 | G0:0022838 | <1e-4 | slr1718 | G0:0005575 | <1e-4 | ssr6019 | G0:0005488 | 0.1066 |
| ssl2781 | G0:0009260 | <1e-4 | slr8044  | G0:0051246 | <1e-4 | sl10230 | G0:0003674 | <1e-4 | slr0909 | G0:0043226 | <1e-4 | ss10350 | G0:0005488 | 0.1066 |
| sl11934 | G0:0009150 | <1e-4 | sl11240  | G0:0034641 | <1e-4 | slr1114 | G0:0015293 | <1e-4 | ssr0657 | G0:0005575 | <1e-4 | ss11300 | G0:0005488 | 0.1066 |
| slr0610 | G0:0009987 | <1e-4 | sl15128  | G0:0006733 | <1e-4 | sl10931 | G0:0016817 | <1e-4 | sl11660 | G0:0044464 | <1e-4 | ssr2067 | G0:0005488 | 0.1066 |
| sl10872 | G0:0046164 | <1e-4 | sl11995  | G0:0009057 | <1e-4 | sl11373 | G0:0043167 | <1e-4 | ssr6002 | G0:0043226 | <1e-4 | ssr2047 | G0:0005488 | 0.1066 |
| ssr3467 | G0:0009259 | <1e-4 | sl117066 | G0:0006066 | <1e-4 | slr0049 | G0:0015405 | <1e-4 | slr1840 | G0:0005575 | <1e-4 | sl10875 | G0:0005488 | 0.1066 |
| sl10703 | G0:0072528 | <1e-4 | slr0801  | G0:0009144 | <1e-4 | sl10413 | G0:0015293 | <1e-4 | sl11504 | G0:0044444 | <1e-4 | sl11049 | G0:0005488 | 0.1066 |
| ssl2384 | G0:0046483 | <1e-4 | slr1619  | G0:0022607 | <1e-4 | sl10590 | G0:0008171 | <1e-4 | slr1840 | G0:0044464 | <1e-4 | slr1442 | G0:0005488 | 0.1066 |
| ssr6026 | G0:0006733 | <1e-4 | slr7010  | G0:0055114 | <1e-4 | ssr6003 | G0:0015291 | <1e-4 | sl11170 | G0:0044425 | <1e-4 | slr1623 | G0:0005488 | 0.1066 |
| sl10787 | G0:0016054 | <1e-4 | sl11735  | G0:0046394 | <1e-4 | ssr5121 | G0:0022803 | <1e-4 | slr0695 | G0:0044425 | <1e-4 | slr1236 | G0:0005488 | 0.1066 |
| ssr2912 | G0:0006163 | <1e-4 | slr0039  | G0:0009991 | <1e-4 | sl11906 | G0:0043492 | <1e-4 | sl18012 | G0:0044425 | <1e-4 | slr1601 | G0:0005488 | 0.1066 |
| slr1287 | G0:0006082 | <1e-4 | sl10369  | G0:0044281 | <1e-4 | sl10283 | G0:0022891 | <1e-4 | slr0208 | G0:0044424 | <1e-4 | ss15114 | G0:0005488 | 0.1066 |
| slr1900 | G0:0046164 | <1e-4 | sl10230  | G0:0044281 | <1e-4 | slr6039 | G0:0042623 | <1e-4 | ssr1766 | G0:0044446 | <1e-4 | ss12595 | G0:0005488 | 0.1066 |
| slr0981 | G0:0055082 | <1e-4 | slr1737  | G0:0006766 | <1e-4 | slr1195 | G0:0016462 | <1e-4 | slr1571 | G0:0044422 | <1e-4 | slr0217 | G0:0005488 | 0.1066 |
| ssr3129 | G0:0045184 | <1e-4 | sl17087  | G0:0009124 | <1e-4 | sl11866 | G0:0005342 | <1e-4 | slr1944 | G0:0044425 | <1e-4 | slr1970 | G0:0005488 | 0.1066 |
| slr1702 | G0:0009059 | <1e-4 | slr1896  | G0:0052188 | <1e-4 | sl10678 | G0:0022836 | <1e-4 | sl17066 | G0:0043226 | <1e-4 | sl10670 | G0:0005488 | 0.1066 |
| slr0393 | G0:0071840 | <1e-4 | slr1753  | G0:0044106 | <1e-4 | sl17006 | G0:0005342 | <1e-4 | slr1624 | G0:0005575 | <1e-4 | slr6028 | G0:0005488 | 0.1066 |

|         |            |       |         |            |       |         |            |       |         |            |       |         |            |        |
|---------|------------|-------|---------|------------|-------|---------|------------|-------|---------|------------|-------|---------|------------|--------|
| s111926 | G0:0042451 | <1e-4 | s110286 | G0:0050789 | <1e-4 | s111225 | G0:0015267 | <1e-4 | slr6049 | G0:0044444 | <1e-4 | ss15015 | G0:0005488 | 0.1066 |
| slr0151 | G0:0006091 | <1e-4 | s111217 | G0:0080090 | <1e-4 | ssr2049 | G0:0005342 | <1e-4 | slr2032 | G0:0044425 | <1e-4 | slr0325 | G0:0005488 | 0.1066 |
| slr0789 | G0:0019752 | <1e-4 | ssl7048 | G0:0009260 | <1e-4 | slr0238 | G0:0022803 | <1e-4 | s111486 | G0:0044446 | <1e-4 | slr1847 | G0:0016787 | 0.1065 |
| s111766 | G0:0060255 | <1e-4 | s110783 | G0:0065007 | <1e-4 | s110857 | G0:0043492 | <1e-4 | s110189 | G0:0044424 | <1e-4 | s110910 | G0:0016787 | 0.1065 |
| ssl7045 | G0:0018130 | <1e-4 | slr5053 | G0:0043436 | <1e-4 | s110803 | G0:0016817 | <1e-4 | s110994 | G0:0044446 | <1e-4 | ss11377 | G0:0016787 | 0.1065 |
| ssr2333 | G0:0006163 | <1e-4 | s111950 | G0:0072524 | <1e-4 | s110980 | G0:0015077 | <1e-4 | slr7095 | G0:0044424 | <1e-4 | s110577 | G0:0016787 | 0.1065 |
| s111866 | G0:0044260 | <1e-4 | ssr5120 | G0:0060255 | <1e-4 | slr0586 | G0:0022892 | <1e-4 | s110810 | G0:0005575 | <1e-4 | slr1307 | G0:0016787 | 0.1065 |
| slr1261 | G0:0031323 | <1e-4 | s110397 | G0:0006066 | <1e-4 | s111702 | G0:0022836 | <1e-4 | ssr2711 | G0:0044444 | <1e-4 | slr1444 | G0:0016787 | 0.1065 |
| ssr0332 | G0:0071840 | <1e-4 | slr0692 | G0:0046907 | <1e-4 | slr0453 | G0:0060089 | <1e-4 | s111736 | G0:0044425 | <1e-4 | s110022 | G0:0016787 | 0.1065 |
| s111640 | G0:0009132 | <1e-4 | slr0551 | G0:0043648 | <1e-4 | slr0634 | G0:0015075 | <1e-4 | slr6094 | G0:0044424 | <1e-4 | ss12733 | G0:0016787 | 0.1065 |
| s111106 | G0:0009144 | <1e-4 | s117031 | G0:0010468 | <1e-4 | ssr7072 | G0:0022891 | <1e-4 | ss12733 | G0:0044446 | <1e-4 | ssr1391 | G0:0016787 | 0.1065 |
| s110008 | G0:0050794 | <1e-4 | slr1530 | G0:0006732 | <1e-4 | s110149 | G0:0042623 | <1e-4 | slr0455 | G0:0044446 | <1e-4 | s110586 | G0:0016787 | 0.1065 |
| slr1152 | G0:0006082 | <1e-4 | s110939 | G0:0009117 | <1e-4 | s110419 | G0:0015405 | <1e-4 | s110803 | G0:0043226 | <1e-4 | slr1098 | G0:0016787 | 0.1065 |
| slr7014 | G0:0006082 | <1e-4 | slr1566 | G0:0006732 | <1e-4 | slr8022 | G0:0022836 | <1e-4 | s110253 | G0:0044422 | <1e-4 | slr0740 | G0:0016787 | 0.1065 |
| ssr2975 | G0:0006631 | <1e-4 | slr7010 | G0:0046483 | <1e-4 | slr0172 | G0:0022832 | <1e-4 | slr1895 | G0:0044425 | <1e-4 | slr0263 | G0:0016787 | 0.1065 |
| s110837 | G0:0033013 | <1e-4 | s111021 | G0:0009132 | <1e-4 | slr0192 | G0:0043492 | <1e-4 | s110577 | G0:0005575 | <1e-4 | slr0978 | G0:0016787 | 0.1065 |
| s110803 | G0:0019219 | <1e-4 | ssr0109 | G0:0009142 | <1e-4 | slr1240 | G0:0015075 | <1e-4 | s115003 | G0:0044464 | <1e-4 | slr0514 | G0:0016787 | 0.1065 |
| slr1338 | G0:0052111 | <1e-4 | s110505 | G0:0044271 | <1e-4 | slr0667 | G0:0005342 | <1e-4 | slr0269 | G0:0044425 | <1e-4 | slr1047 | G0:0016787 | 0.1065 |
| slr1914 | G0:0016054 | <1e-4 | slr1788 | G0:0009262 | <1e-4 | slr1270 | G0:0016818 | <1e-4 | slr1240 | G0:0043226 | <1e-4 | s110175 | G0:0016787 | 0.1065 |
| slr6022 | G0:0009309 | <1e-4 | s110175 | G0:0072521 | <1e-4 | ss12781 | G0:0016462 | <1e-4 | ss18028 | G0:0044424 | <1e-4 | slr1865 | G0:0016787 | 0.1065 |
| s111241 | G0:0044003 | <1e-4 | s111530 | G0:0046164 | <1e-4 | slr8014 | G0:0016817 | <1e-4 | slr1056 | G0:0044424 | <1e-4 | slr1471 | G0:0000166 | 0.1065 |
| s111192 | G0:0090304 | <1e-4 | ssr2972 | G0:0071554 | <1e-4 | s115046 | G0:0015399 | <1e-4 | slr6031 | G0:0044424 | <1e-4 | s110361 | G0:0016787 | 0.1065 |
| s110931 | G0:0031323 | <1e-4 | s111233 | G0:0006066 | <1e-4 | slr6045 | G0:0043167 | <1e-4 | slr0360 | G0:0044425 | <1e-4 | slr0607 | G0:0016787 | 0.1065 |
| s110793 | G0:0050794 | <1e-4 | s110688 | G0:0031640 | <1e-4 | s110572 | G0:0016818 | <1e-4 | slr0609 | G0:0044446 | <1e-4 | s110192 | G0:0016787 | 0.1065 |
| slr0423 | G0:0048523 | <1e-4 | s110447 | G0:0046483 | <1e-4 | s111659 | G0:0016817 | <1e-4 | ss10787 | G0:0005575 | <1e-4 | slr1726 | G0:0016787 | 0.1065 |
| ssr0102 | G0:0009126 | <1e-4 | slr0059 | G0:0043170 | <1e-4 | slr1699 | G0:0022890 | <1e-4 | slr0157 | G0:0043226 | <1e-4 | s110183 | G0:0016787 | 0.1065 |
| slr0199 | G0:0050794 | <1e-4 | slr1203 | G0:0051716 | <1e-4 | s111915 | G0:0016817 | <1e-4 | ssr3572 | G0:0044446 | <1e-4 | slr1767 | G0:0016787 | 0.1065 |
| s110602 | G0:0052188 | <1e-4 | s111254 | G0:0051716 | <1e-4 | s110933 | G0:0022836 | <1e-4 | s111472 | G0:0044464 | <1e-4 | s110488 | G0:0005488 | 0.1049 |
| slr0613 | G0:0009142 | <1e-4 | s111036 | G0:0009123 | <1e-4 | s117070 | G0:0022803 | <1e-4 | s110355 | G0:0044444 | <1e-4 | ssr1258 | G0:0016787 | 0.1048 |
| s110810 | G0:0046164 | <1e-4 | ssr1155 | G0:0010468 | <1e-4 | s110062 | G0:0022838 | <1e-4 | slr6038 | G0:0044446 | <1e-4 | ss13291 | G0:0016787 | 0.1048 |
| ss10483 | G0:0044255 | <1e-4 | s110864 | G0:0044275 | <1e-4 | s112015 | G0:0022832 | <1e-4 | slr1565 | G0:0044464 | <1e-4 | s110269 | G0:0016787 | 0.1048 |
| s111527 | G0:0010468 | <1e-4 | slr1206 | G0:0009263 | <1e-4 | slr1667 | G0:0022857 | <1e-4 | s117034 | G0:0005575 | <1e-4 | s110272 | G0:0016787 | 0.1048 |
| s117067 | G0:0051171 | <1e-4 | slr0065 | G0:0043412 | <1e-4 | s110301 | G0:0015077 | <1e-4 | s110847 | G0:0044446 | <1e-4 | s111119 | G0:0016787 | 0.1048 |
| s111658 | G0:0043412 | <1e-4 | ss15025 | G0:0051716 | <1e-4 | slr0092 | G0:0022892 | <1e-4 | ssr3304 | G0:0044444 | <1e-4 | slr0208 | G0:0016787 | 0.1048 |
| slr1674 | G0:0031640 | <1e-4 | s111106 | G0:0080090 | <1e-4 | slr1900 | G0:0022803 | <1e-4 | s115046 | G0:0005575 | <1e-4 | slr1565 | G0:0016787 | 0.1048 |
| ssr6099 | G0:0044003 | <1e-4 | s110810 | G0:0019752 | <1e-4 | slr1223 | G0:0015405 | <1e-4 | slr1417 | G0:0044464 | <1e-4 | s110103 | G0:0016787 | 0.1048 |
| slr1964 | G0:0006220 | <1e-4 | s110765 | G0:0046164 | <1e-4 | slr2105 | G0:0015405 | <1e-4 | s110785 | G0:0044446 | <1e-4 | slr0919 | G0:0016787 | 0.1048 |
| s110822 | G0:0044275 | <1e-4 | slr0689 | G0:0048518 | <1e-4 | slr1599 | G0:0015291 | <1e-4 | slr0404 | G0:0005575 | <1e-4 | s110071 | G0:0016787 | 0.1048 |
| slr1450 | G0:0019222 | <1e-4 | s110354 | G0:0019752 | <1e-4 | ss10410 | G0:0022836 | <1e-4 | s111086 | G0:0005575 | <1e-4 | slr1032 | G0:0016787 | 0.1048 |
| s110647 | G0:0006082 | <1e-4 | ssr6078 | G0:0006082 | <1e-4 | slr2101 | G0:0015267 | <1e-4 | s112007 | G0:0044464 | <1e-4 | slr0848 | G0:0016787 | 0.1048 |
| s111304 | G0:0046164 | <1e-4 | ss10483 | G0:0006066 | <1e-4 | slr1852 | G0:0015293 | <1e-4 | ssr2802 | G0:0044425 | <1e-4 | s111250 | G0:0016787 | 0.1048 |
| s110497 | G0:0019752 | <1e-4 | ssr1407 | G0:0019752 | <1e-4 | slr0287 | G0:0016746 | <1e-4 | slr1365 | G0:0044425 | <1e-4 | ss10832 | G0:0016787 | 0.1048 |
| slr1819 | G0:0044281 | <1e-4 | s111573 | G0:0009987 | <1e-4 | s116052 | G0:0043167 | <1e-4 | slr7037 | G0:0005575 | <1e-4 | slr2038 | G0:0016787 | 0.1048 |
| ss18028 | G0:0046394 | <1e-4 | s111784 | G0:0080090 | <1e-4 | s110242 | G0:0043169 | <1e-4 | slr2060 | G0:0044446 | <1e-4 | slr0980 | G0:0016787 | 0.1048 |
| s110497 | G0:0010556 | <1e-4 | slr0326 | G0:0009260 | <1e-4 | s110071 | G0:0022836 | <1e-4 | s111396 | G0:0044424 | <1e-4 | slr1052 | G0:0005215 | 0.1042 |
| s115006 | G0:0042451 | <1e-4 | slr0006 | G0:0044283 | <1e-4 | s110189 | G0:0015399 | <1e-4 | slr1657 | G0:0044446 | <1e-4 | slr1812 | G0:0005215 | 0.1042 |
| ssr8047 | G0:0031326 | <1e-4 | ssr6019 | G0:0043933 | <1e-4 | slr1062 | G0:0015405 | <1e-4 | s111219 | G0:0044444 | <1e-4 | slr0810 | G0:0016787 | 0.1032 |
| slr5037 | G0:0019362 | <1e-4 | slr0619 | G0:0009263 | <1e-4 | slr0596 | G0:0016741 | <1e-4 | slr0821 | G0:0044424 | <1e-4 | slr1603 | G0:0016787 | 0.1032 |
| s110518 | G0:0006811 | <1e-4 | s111389 | G0:0022607 | <1e-4 | slr0184 | G0:0016818 | <1e-4 | slr7023 | G0:0044422 | <1e-4 | slr2092 | G0:0016787 | 0.1032 |
| slr1774 | G0:0009308 | <1e-4 | slr0751 | G0:0001932 | <1e-4 | slr1613 | G0:0015405 | <1e-4 | slr0285 | G0:0005575 | <1e-4 | s111858 | G0:0016787 | 0.1032 |
| s110837 | G0:0043436 | <1e-4 | s111652 | G0:0006066 | <1e-4 | ss10353 | G0:0016462 | <1e-4 | ssr0102 | G0:0044424 | <1e-4 | slr0341 | G0:0016787 | 0.1032 |
| slr0871 | G0:0051188 | <1e-4 | slr1263 | G0:0051716 | <1e-4 | s111902 | G0:0016746 | <1e-4 | ssr6027 | G0:0005575 | <1e-4 | s111737 | G0:0016787 | 0.1032 |
| slr1591 | G0:0016052 | <1e-4 | s111233 | G0:0009165 | <1e-4 | s111898 | G0:0015077 | <1e-4 | slr1162 | G0:0044464 | <1e-4 | slr1098 | G0:0017111 | 0.1027 |
| s111611 | G0:0051347 | <1e-4 | ss15129 | G0:0009987 | <1e-4 | s110513 | G0:0015405 | <1e-4 | s110284 | G0:0044464 | <1e-4 | s110558 | G0:0017111 | 0.1027 |

|         |            |       |         |            |       |         |            |       |         |            |       |         |            |        |
|---------|------------|-------|---------|------------|-------|---------|------------|-------|---------|------------|-------|---------|------------|--------|
| sl10149 | G0:0019637 | <1e-4 | sl11411 | G0:0006220 | <1e-4 | slr0852 | G0:0022838 | <1e-4 | slr1222 | G0:0044444 | <1e-4 | slr0909 | G0:0017111 | 0.1027 |
| slr1896 | G0:0051179 | <1e-4 | ssr5019 | G0:0006811 | <1e-4 | sl11306 | G0:0003674 | <1e-4 | slr2060 | G0:0044464 | <1e-4 | sl10577 | G0:0017111 | 0.1027 |
| slr0742 | G0:0009991 | <1e-4 | sl11611 | G0:0052111 | <1e-4 | sl11608 | G0:0015291 | <1e-4 | sl10740 | G0:0043226 | <1e-4 | ss12733 | G0:0017111 | 0.1027 |
| slr0872 | G0:0005996 | <1e-4 | ssl2384 | G0:0051234 | <1e-4 | ssr5106 | G0:0015291 | <1e-4 | slr1066 | G0:0005575 | <1e-4 | sl10183 | G0:0017111 | 0.1027 |
| slr0848 | G0:0006066 | <1e-4 | slr1101 | G0:0009141 | <1e-4 | sl11092 | G0:0043492 | <1e-4 | slr0209 | G0:0043226 | <1e-4 | slr1800 | G0:0017111 | 0.1027 |
| sl10400 | G0:0006576 | <1e-4 | sl11640 | G0:0090304 | <1e-4 | sl10414 | G0:0022892 | <1e-4 | slr0264 | G0:0044444 | <1e-4 | ss11377 | G0:0017111 | 0.1027 |
| slr1071 | G0:0006733 | <1e-4 | sl11024 | G0:0044271 | <1e-4 | sl11757 | G0:0003674 | <1e-4 | slr6044 | G0:0044444 | <1e-4 | slr0923 | G0:0017111 | 0.1027 |
| sl10328 | G0:0044275 | <1e-4 | sl10639 | G0:0042180 | <1e-4 | sl11340 | G0:0016818 | <1e-4 | slr0907 | G0:0005575 | <1e-4 | slr1301 | G0:0017111 | 0.1027 |
| sl11979 | G0:0034654 | <1e-4 | sl11272 | G0:0042451 | <1e-4 | slr0569 | G0:0022832 | <1e-4 | slr0885 | G0:0044422 | <1e-4 | slr0978 | G0:0017111 | 0.1027 |
| slr2052 | G0:0051179 | <1e-4 | sl10192 | G0:0042180 | <1e-4 | slr0521 | G0:0022891 | <1e-4 | slr0317 | G0:0044444 | <1e-4 | sl10732 | G0:0017111 | 0.1027 |
| slr1977 | G0:0048518 | <1e-4 | slr6051 | G0:0009987 | <1e-4 | ssr7017 | G0:0015399 | <1e-4 | sl10238 | G0:0043226 | <1e-4 | slr1726 | G0:0017111 | 0.1027 |
| slr0980 | G0:0051171 | <1e-4 | sl10788 | G0:0009394 | <1e-4 | sl10280 | G0:0008171 | <1e-4 | sl11632 | G0:0044424 | <1e-4 | slr1307 | G0:0017111 | 0.1027 |
| sl10843 | G0:0009892 | <1e-4 | sl10552 | G0:0033013 | <1e-4 | sl15089 | G0:0016746 | <1e-4 | ss15008 | G0:0005575 | <1e-4 | slr0607 | G0:0017111 | 0.1027 |
| slr0771 | G0:0006066 | <1e-4 | slr0552 | G0:0034660 | <1e-4 | slr0770 | G0:0015405 | <1e-4 | sl10449 | G0:0044425 | <1e-4 | slr1851 | G0:0017111 | 0.1027 |
| ssl1577 | G0:0009141 | <1e-4 | sl11173 | G0:0009309 | <1e-4 | sl10742 | G0:0016817 | <1e-4 | sl10068 | G0:0044424 | <1e-4 | sl10910 | G0:0017111 | 0.1027 |
| slr1306 | G0:0071842 | <1e-4 | slr1339 | G0:0043933 | <1e-4 | slr1591 | G0:0022892 | <1e-4 | sl10597 | G0:0044444 | <1e-4 | sl10586 | G0:0017111 | 0.1027 |
| slr7096 | G0:0009117 | <1e-4 | sl10532 | G0:0005996 | <1e-4 | slr0751 | G0:0016741 | <1e-4 | ss15096 | G0:0044424 | <1e-4 | slr0479 | G0:0017111 | 0.1027 |
| sl11174 | G0:0048519 | <1e-4 | sl11757 | G0:0051171 | <1e-4 | ss10446 | G0:0015293 | <1e-4 | slr0770 | G0:0044422 | <1e-4 | slr1767 | G0:0017111 | 0.1027 |
| ssr3532 | G0:0051171 | <1e-4 | ssr3409 | G0:0051171 | <1e-4 | slr0668 | G0:0015293 | <1e-4 | slr5021 | G0:0044446 | <1e-4 | sl10022 | G0:0017111 | 0.1027 |
| slr0146 | G0:0006811 | <1e-4 | slr0930 | G0:0090304 | <1e-4 | slr0392 | G0:0016746 | <1e-4 | sl11825 | G0:0043226 | <1e-4 | slr1847 | G0:0017111 | 0.1027 |
| sl11765 | G0:0006066 | <1e-4 | sl11193 | G0:0005996 | <1e-4 | sl18040 | G0:0015291 | <1e-4 | slr2080 | G0:0044425 | <1e-4 | slr1444 | G0:0017111 | 0.1027 |
| slr1425 | G0:0016053 | <1e-4 | ssl0242 | G0:0033013 | <1e-4 | ss17042 | G0:0015075 | <1e-4 | slr1397 | G0:0044444 | <1e-4 | slr0263 | G0:0017111 | 0.1027 |
| sl11061 | G0:0006082 | <1e-4 | slr1896 | G0:0051716 | <1e-4 | ss13615 | G0:0022890 | <1e-4 | ssr1256 | G0:0044424 | <1e-4 | slr0496 | G0:0017111 | 0.1027 |
| sl11352 | G0:0008150 | <1e-4 | slr1218 | G0:0071841 | <1e-4 | sl11939 | G0:0022890 | <1e-4 | slr2073 | G0:0005575 | <1e-4 | slr1811 | G0:0017111 | 0.1027 |
| slr6007 | G0:0043549 | <1e-4 | ssl2384 | G0:0009142 | <1e-4 | sl11173 | G0:0022857 | <1e-4 | sl11158 | G0:0044446 | <1e-4 | ssr1391 | G0:0017111 | 0.1027 |
| sl11378 | G0:0051347 | <1e-4 | sl11060 | G0:0008610 | <1e-4 | slr0184 | G0:0016746 | <1e-4 | sl11775 | G0:0044424 | <1e-4 | sl11446 | G0:0016787 | 0.1007 |
| sl10225 | G0:0034654 | <1e-4 | sl10023 | G0:0042451 | <1e-4 | sl10863 | G0:0003674 | <1e-4 | sl10676 | G0:0044425 | <1e-4 | sl10446 | G0:0016787 | 0.1007 |
| sl11359 | G0:0010556 | <1e-4 | ssr5011 | G0:0044260 | <1e-4 | slr1087 | G0:0022891 | <1e-4 | ssr3410 | G0:0044464 | <1e-4 | slr0818 | G0:0016787 | 0.1007 |
| slr1647 | G0:0006811 | <1e-4 | sl10496 | G0:0051818 | <1e-4 | slr0870 | G0:0015075 | <1e-4 | sl17047 | G0:0005575 | <1e-4 | sl11995 | G0:0016787 | 0.1007 |
| ssr2962 | G0:0009309 | <1e-4 | slr6005 | G0:0006163 | <1e-4 | ssr3122 | G0:0016746 | <1e-4 | slr1913 | G0:0044425 | <1e-4 | slr1773 | G0:0016787 | 0.1007 |
| slr1940 | G0:0055114 | <1e-4 | slr7026 | G0:0009123 | <1e-4 | slr1262 | G0:0016818 | <1e-4 | slr0442 | G0:0044422 | <1e-4 | slr0642 | G0:0016787 | 0.1007 |
| sl10760 | G0:0052111 | <1e-4 | sl10456 | G0:0044271 | <1e-4 | sl11072 | G0:0043167 | <1e-4 | slr1721 | G0:0005575 | <1e-4 | slr1591 | G0:0016787 | 0.1007 |
| ss15064 | G0:0043933 | <1e-4 | sg10001 | G0:0016052 | <1e-4 | sl10298 | G0:0015077 | <1e-4 | slr1472 | G0:0043226 | <1e-4 | slr1774 | G0:0016787 | 0.1007 |
| slr0393 | G0:0034641 | <1e-4 | slr1913 | G0:0009150 | <1e-4 | sl11132 | G0:0016817 | <1e-4 | sl10669 | G0:0005575 | <1e-4 | slr0765 | G0:0016787 | 0.1007 |
| slr0978 | G0:0009263 | <1e-4 | sl10997 | G0:0044255 | <1e-4 | slr2084 | G0:0022803 | <1e-4 | sl10871 | G0:0005575 | <1e-4 | ssr3154 | G0:0016787 | 0.1007 |
| ssl2717 | G0:0080090 | <1e-4 | ssl3692 | G0:0044282 | <1e-4 | slr8021 | G0:0015077 | <1e-4 | slr6047 | G0:0044444 | <1e-4 | sl10735 | G0:0016787 | 0.1007 |
| sl16054 | G0:0046164 | <1e-4 | sl11528 | G0:0006753 | <1e-4 | slr0404 | G0:0043167 | <1e-4 | slr0553 | G0:0005575 | <1e-4 | sl10584 | G0:0016787 | 0.0973 |
| ssl1552 | G0:0072522 | <1e-4 | ssr6083 | G0:0009260 | <1e-4 | ssr1552 | G0:0016818 | <1e-4 | sl11388 | G0:0044424 | <1e-4 | sl11293 | G0:0016787 | 0.0973 |
| slr1809 | G0:0009987 | <1e-4 | slr0263 | G0:0006753 | <1e-4 | sl10905 | G0:0015077 | <1e-4 | ss10750 | G0:0044464 | <1e-4 | ss10294 | G0:0016787 | 0.0973 |
| sl10498 | G0:0006066 | <1e-4 | sl10913 | G0:0006766 | <1e-4 | sl10007 | G0:0015075 | <1e-4 | sl10400 | G0:0043226 | <1e-4 | ss10750 | G0:0016787 | 0.0973 |
| sl11512 | G0:0072521 | <1e-4 | sl11965 | G0:0009059 | <1e-4 | slr5119 | G0:0022832 | <1e-4 | slr2144 | G0:0044425 | <1e-4 | sl11763 | G0:0016787 | 0.0973 |
| slr2110 | G0:0006220 | <1e-4 | slr6045 | G0:0009123 | <1e-4 | ssr2554 | G0:0022832 | <1e-4 | slr0637 | G0:0044424 | <1e-4 | sl11527 | G0:0016787 | 0.0973 |
| slr0109 | G0:0046164 | <1e-4 | slr1624 | G0:0060255 | <1e-4 | slr6009 | G0:0016817 | <1e-4 | ssr6085 | G0:0044424 | <1e-4 | sl10350 | G0:0016787 | 0.0973 |
| slr1847 | G0:0019752 | <1e-4 | ssl1552 | G0:0019362 | <1e-4 | ssl2384 | G0:0022832 | <1e-4 | slr2110 | G0:0044464 | <1e-4 | ss10787 | G0:0003676 | 0.0971 |
| ss18039 | G0:0009987 | <1e-4 | slr0238 | G0:0016054 | <1e-4 | ss15007 | G0:0016462 | <1e-4 | slr0613 | G0:0044444 | <1e-4 | sl10096 | G0:0003676 | 0.0971 |
| ssl6061 | G0:0031323 | <1e-4 | slr0960 | G0:0050794 | <1e-4 | ssr6048 | G0:0043492 | <1e-4 | sl10811 | G0:0044425 | <1e-4 | sl12006 | G0:0003676 | 0.0971 |
| ssl3291 | G0:0071496 | <1e-4 | sl11252 | G0:0072521 | <1e-4 | sl10436 | G0:0016818 | <1e-4 | sl10095 | G0:0044422 | <1e-4 | sl10854 | G0:0003676 | 0.0971 |
| sl10762 | G0:0034641 | <1e-4 | slr0442 | G0:0080090 | <1e-4 | sl10525 | G0:0015291 | <1e-4 | sl10930 | G0:0044425 | <1e-4 | slr1866 | G0:0003676 | 0.0971 |
| sl10981 | G0:0052111 | <1e-4 | slr1544 | G0:0019751 | <1e-4 | ssl1520 | G0:0016741 | <1e-4 | slr0483 | G0:0044425 | <1e-4 | ssr3532 | G0:0003676 | 0.0971 |
| sl10615 | G0:0044003 | <1e-4 | slr0111 | G0:0046907 | <1e-4 | ssl3451 | G0:0015291 | <1e-4 | ssr1768 | G0:0043226 | <1e-4 | ssr0536 | G0:0003676 | 0.0971 |
| ssl7007 | G0:0009144 | <1e-4 | ssr2802 | G0:0008150 | <1e-4 | slr1951 | G0:0022857 | <1e-4 | sl15003 | G0:0044446 | <1e-4 | slr0937 | G0:0003676 | 0.0971 |
| sl11193 | G0:0016051 | <1e-4 | slr1847 | G0:0009123 | <1e-4 | slr1513 | G0:0015291 | <1e-4 | slr0935 | G0:0044424 | <1e-4 | slr1127 | G0:0003676 | 0.0971 |
| sl10984 | G0:0052111 | <1e-4 | sl10069 | G0:0051716 | <1e-4 | ssr3129 | G0:0043492 | <1e-4 | sl11965 | G0:0044464 | <1e-4 | slr1896 | G0:0003676 | 0.0971 |
| slr2121 | G0:0044106 | <1e-4 | sl10007 | G0:0006091 | <1e-4 | sl10787 | G0:0022857 | <1e-4 | slr0863 | G0:0043226 | <1e-4 | sl10382 | G0:0003676 | 0.0971 |



|         |            |       |         |            |       |         |            |       |         |            |       |         |            |        |
|---------|------------|-------|---------|------------|-------|---------|------------|-------|---------|------------|-------|---------|------------|--------|
| slr0058 | G0:0009057 | <1e-4 | slr1534 | G0:0019752 | <1e-4 | slr1721 | G0:0015399 | <1e-4 | slr0400 | G0:0044446 | <1e-4 | sl10263 | G0:0003676 | 0.0971 |
| sl17028 | G0:0051716 | <1e-4 | slr5102 | G0:0071496 | <1e-4 | sl11285 | G0:0016741 | <1e-4 | sl10558 | G0:0044425 | <1e-4 | sl10447 | G0:0003676 | 0.0971 |
| slr5024 | G0:0010556 | <1e-4 | sl10658 | G0:0044281 | <1e-4 | ss10787 | G0:0043492 | <1e-4 | sl10996 | G0:0044446 | <1e-4 | sl10743 | G0:0003676 | 0.0971 |
| sl11372 | G0:0008610 | <1e-4 | slr7016 | G0:0051246 | <1e-4 | ss13382 | G0:0022891 | <1e-4 | sl10685 | G0:0044444 | <1e-4 | slr0476 | G0:0003676 | 0.0971 |
| sl11960 | G0:0009123 | <1e-4 | sl10149 | G0:0072527 | <1e-4 | sl11735 | G0:0015399 | <1e-4 | sl10252 | G0:0044446 | <1e-4 | slr0076 | G0:0003676 | 0.0971 |
| sl17062 | G0:0006811 | <1e-4 | slr1677 | G0:0009057 | <1e-4 | slr1397 | G0:0008171 | <1e-4 | sl10268 | G0:0044464 | <1e-4 | slr0852 | G0:0003676 | 0.0971 |
| slr1513 | G0:0009987 | <1e-4 | slr0303 | G0:0090304 | <1e-4 | sl10237 | G0:0016746 | <1e-4 | slr1079 | G0:0044425 | <1e-4 | slr1674 | G0:0003676 | 0.0971 |
| sl10218 | G0:0006066 | <1e-4 | sl11942 | G0:0044260 | <1e-4 | sl10854 | G0:0003674 | <1e-4 | sl10208 | G0:0044464 | <1e-4 | slr1557 | G0:0003676 | 0.0971 |
| slr6065 | G0:0046164 | <1e-4 | slr1847 | G0:0051188 | <1e-4 | ss11918 | G0:0022890 | <1e-4 | sl10775 | G0:0005575 | <1e-4 | slr1196 | G0:0003676 | 0.0971 |
| sl10761 | G0:0042180 | <1e-4 | ssr7093 | G0:0043933 | <1e-4 | slr1659 | G0:0022890 | <1e-4 | slr2071 | G0:0043226 | <1e-4 | sl10274 | G0:0003676 | 0.0971 |
| ssr6048 | G0:0009987 | <1e-4 | slr1927 | G0:0044106 | <1e-4 | slr0181 | G0:0015405 | <1e-4 | ss11263 | G0:0043226 | <1e-4 | sl11934 | G0:0003676 | 0.0971 |
| slr6106 | G0:0044283 | <1e-4 | sl11925 | G0:0044003 | <1e-4 | slr1623 | G0:0022891 | <1e-4 | sl10162 | G0:0005575 | <1e-4 | slr0287 | G0:0003676 | 0.0971 |
| sl10444 | G0:0043436 | <1e-4 | sl10871 | G0:0044106 | <1e-4 | sl10280 | G0:0015399 | <1e-4 | sl17030 | G0:0043226 | <1e-4 | sl10933 | G0:0005488 | 0.0964 |
| ssr6086 | G0:0044275 | <1e-4 | sl10702 | G0:0046164 | <1e-4 | ssr2067 | G0:0060089 | <1e-4 | sl11832 | G0:0044424 | <1e-4 | ssr2781 | G0:0017111 | 0.0955 |
| slr7016 | G0:0009259 | <1e-4 | sl11528 | G0:0045184 | <1e-4 | slr1087 | G0:0043167 | <1e-4 | sl17006 | G0:0044422 | <1e-4 | slr0848 | G0:0017111 | 0.0955 |
| ssr0109 | G0:0044275 | <1e-4 | slr0458 | G0:0009144 | <1e-4 | slr1438 | G0:0022803 | <1e-4 | slr0400 | G0:0043226 | <1e-4 | slr0980 | G0:0017111 | 0.0955 |
| ss18028 | G0:0044260 | <1e-4 | sl11040 | G0:0044003 | <1e-4 | sl10871 | G0:0042623 | <1e-4 | sl10424 | G0:0044425 | <1e-4 | slr2018 | G0:0017111 | 0.0955 |
| slr1450 | G0:0090304 | <1e-4 | slr6091 | G0:0009123 | <1e-4 | sl11472 | G0:0016746 | <1e-4 | sl10518 | G0:0044464 | <1e-4 | sl10269 | G0:0017111 | 0.0955 |
| sl10609 | G0:0009892 | <1e-4 | sl11201 | G0:0019222 | <1e-4 | slr0208 | G0:0022891 | <1e-4 | ss10350 | G0:0044444 | <1e-4 | sl10071 | G0:0017111 | 0.0955 |
| slr1657 | G0:0046164 | <1e-4 | slr1468 | G0:0071842 | <1e-4 | slr0271 | G0:0015267 | <1e-4 | sl11166 | G0:0044464 | <1e-4 | slr0317 | G0:0017111 | 0.0955 |
| sl18019 | G0:0051716 | <1e-4 | sl10702 | G0:0055086 | <1e-4 | slr0921 | G0:0022838 | <1e-4 | ssr5019 | G0:0044424 | <1e-4 | ss10832 | G0:0017111 | 0.0955 |
| sl11949 | G0:0046128 | <1e-4 | sl10241 | G0:0006721 | <1e-4 | sl16055 | G0:0015399 | <1e-4 | sl10749 | G0:0005575 | <1e-4 | slr0442 | G0:0017111 | 0.0955 |
| sl10595 | G0:0044271 | <1e-4 | sl10498 | G0:0060255 | <1e-4 | sl11834 | G0:0022891 | <1e-4 | sl17075 | G0:0005575 | <1e-4 | sl10702 | G0:0017111 | 0.0955 |
| sl10381 | G0:0080090 | <1e-4 | slr0948 | G0:0018130 | <1e-4 | slr0870 | G0:0016741 | <1e-4 | ssr2049 | G0:0044464 | <1e-4 | slr1032 | G0:0017111 | 0.0955 |
| slr0104 | G0:0051179 | <1e-4 | slr1464 | G0:0008610 | <1e-4 | ss17045 | G0:0016818 | <1e-4 | sl10802 | G0:0044444 | <1e-4 | sl10647 | G0:0017111 | 0.0955 |
| slr1907 | G0:0009117 | <1e-4 | slr1927 | G0:0019752 | <1e-4 | sl11344 | G0:0015405 | <1e-4 | slr1964 | G0:0044444 | <1e-4 | slr2084 | G0:0017111 | 0.0955 |
| ss11255 | G0:0016052 | <1e-4 | slr1114 | G0:0006066 | <1e-4 | ss11263 | G0:0060089 | <1e-4 | sl11049 | G0:0044424 | <1e-4 | ss13291 | G0:0017111 | 0.0955 |
| sl10661 | G0:0044283 | <1e-4 | sl11390 | G0:0051171 | <1e-4 | slr5118 | G0:0022803 | <1e-4 | slr5018 | G0:0044444 | <1e-4 | sl11424 | G0:0017111 | 0.0955 |
| sl11832 | G0:0001932 | <1e-4 | ssr2975 | G0:0044106 | <1e-4 | sl10623 | G0:0003674 | <1e-4 | slr1082 | G0:0005575 | <1e-4 | ssr1256 | G0:0017111 | 0.0955 |
| slr1081 | G0:0055114 | <1e-4 | slr0654 | G0:0045184 | <1e-4 | sl10167 | G0:0015291 | <1e-4 | slr8014 | G0:0044425 | <1e-4 | sl11775 | G0:0017111 | 0.0955 |
| ss15098 | G0:0022607 | <1e-4 | ss17042 | G0:0022411 | <1e-4 | slr2117 | G0:0022836 | <1e-4 | sl10168 | G0:0005575 | <1e-4 | slr0919 | G0:0017111 | 0.0955 |
| slr1544 | G0:0051234 | <1e-4 | ss13291 | G0:0019637 | <1e-4 | slr0238 | G0:0016741 | <1e-4 | slr1618 | G0:0044464 | <1e-4 | sl11749 | G0:0017111 | 0.0955 |
| ssr3572 | G0:0034654 | <1e-4 | sl11131 | G0:0072528 | <1e-4 | slr0208 | G0:0015399 | <1e-4 | sl15130 | G0:0005575 | <1e-4 | sl10103 | G0:0017111 | 0.0955 |
| slr0345 | G0:0043436 | <1e-4 | sl11163 | G0:0009123 | <1e-4 | slr0362 | G0:0015405 | <1e-4 | slr2125 | G0:0005575 | <1e-4 | sl10932 | G0:0017111 | 0.0955 |
| ss17038 | G0:0051818 | <1e-4 | slr0241 | G0:0065007 | <1e-4 | sl10168 | G0:0022892 | <1e-4 | slr0989 | G0:0005575 | <1e-4 | ssr2803 | G0:0017111 | 0.0955 |
| slr1799 | G0:0046907 | <1e-4 | slr0765 | G0:0006220 | <1e-4 | slr0496 | G0:0015291 | <1e-4 | sl11119 | G0:0043226 | <1e-4 | slr0579 | G0:0017111 | 0.0955 |
| slr0960 | G0:0043170 | <1e-4 | sl10284 | G0:0046128 | <1e-4 | sl11542 | G0:0005342 | <1e-4 | slr0065 | G0:0043226 | <1e-4 | slr0408 | G0:0017111 | 0.0955 |
| sl10586 | G0:0034641 | <1e-4 | sl17050 | G0:0044248 | <1e-4 | ssr2553 | G0:0015399 | <1e-4 | slr1441 | G0:0044422 | <1e-4 | slr1636 | G0:0016787 | 0.0952 |
| sl11378 | G0:0065007 | <1e-4 | slr0602 | G0:0006082 | <1e-4 | slr0468 | G0:0015077 | <1e-4 | sl11511 | G0:0044464 | <1e-4 | sl10931 | G0:0016787 | 0.0952 |
| slr1571 | G0:0050789 | <1e-4 | slr7024 | G0:0019222 | <1e-4 | slr0602 | G0:0022832 | <1e-4 | slr1895 | G0:0005575 | <1e-4 | sl10413 | G0:0016787 | 0.0952 |
| sl11455 | G0:0009150 | <1e-4 | sl10443 | G0:0018130 | <1e-4 | sl11250 | G0:0016817 | <1e-4 | ss12920 | G0:0005575 | <1e-4 | slr1052 | G0:0016787 | 0.0952 |
| slr1397 | G0:0009259 | <1e-4 | slr6028 | G0:0042180 | <1e-4 | slr0975 | G0:0043167 | <1e-4 | slr0863 | G0:0044444 | <1e-4 | slr1117 | G0:0009058 | 0.0945 |
| slr0108 | G0:0006220 | <1e-4 | slr1851 | G0:0009141 | <1e-4 | sl10301 | G0:0042623 | <1e-4 | sl10985 | G0:0005575 | <1e-4 | slr1932 | G0:0009058 | 0.0945 |
| slr1127 | G0:0031326 | <1e-4 | slr0294 | G0:0051171 | <1e-4 | sl11702 | G0:0043492 | <1e-4 | slr0655 | G0:0005575 | <1e-4 | slr0482 | G0:0009058 | 0.0945 |
| slr1676 | G0:0043648 | <1e-4 | ss11004 | G0:0008150 | <1e-4 | sl11162 | G0:0022838 | <1e-4 | sl11541 | G0:0044424 | <1e-4 | sl10785 | G0:0009058 | 0.0945 |
| slr6039 | G0:0050801 | <1e-4 | ssr3341 | G0:0006091 | <1e-4 | slr0606 | G0:0022890 | <1e-4 | slr1103 | G0:0005575 | <1e-4 | slr0431 | G0:0009058 | 0.0945 |
| slr1815 | G0:0006732 | <1e-4 | slr0013 | G0:0044275 | <1e-4 | sl10185 | G0:0016817 | <1e-4 | slr1799 | G0:0044422 | <1e-4 | ss12065 | G0:0009058 | 0.0945 |
| slr1809 | G0:0034660 | <1e-4 | sl10294 | G0:0072521 | <1e-4 | sl10456 | G0:0042623 | <1e-4 | sl10638 | G0:0044425 | <1e-4 | sl10780 | G0:0009058 | 0.0945 |
| slr1431 | G0:0009056 | <1e-4 | slr8021 | G0:0009126 | <1e-4 | ssr6002 | G0:0016817 | <1e-4 | slr6057 | G0:0044424 | <1e-4 | slr1571 | G0:0009058 | 0.0945 |
| slr0013 | G0:0050789 | <1e-4 | slr6045 | G0:0019751 | <1e-4 | sl11527 | G0:0003674 | <1e-4 | ss10109 | G0:0044446 | <1e-4 | sl10645 | G0:0009058 | 0.0945 |
| ssr5106 | G0:0043549 | <1e-4 | sl11095 | G0:0071841 | <1e-4 | slr8014 | G0:0022891 | <1e-4 | slr0545 | G0:0005575 | <1e-4 | slr1437 | G0:0009058 | 0.0945 |
| sl11071 | G0:0010468 | <1e-4 | sl11348 | G0:0044003 | <1e-4 | slr1196 | G0:0005342 | <1e-4 | slr0579 | G0:0044444 | <1e-4 | sl10237 | G0:0009058 | 0.0945 |
| sl17047 | G0:0009150 | <1e-4 | sl11504 | G0:0019752 | <1e-4 | ssr6026 | G0:0022803 | <1e-4 | slr1215 | G0:0043234 | <1e-4 | slr0294 | G0:0009058 | 0.0945 |
| slr0582 | G0:0006091 | <1e-4 | slr0364 | G0:0001932 | <1e-4 | sl11563 | G0:0022857 | <1e-4 | sl10702 | G0:0044446 | <1e-4 | slr1436 | G0:0009058 | 0.0945 |

|         |            |       |         |            |       |         |            |       |         |            |       |         |            |        |
|---------|------------|-------|---------|------------|-------|---------|------------|-------|---------|------------|-------|---------|------------|--------|
| slr1098 | G0:0046483 | <1e-4 | slr0971 | G0:0044003 | <1e-4 | slr0106 | G0:0022891 | <1e-4 | slr1290 | G0:0044444 | <1e-4 | slr1573 | G0:0009058 | 0.0945 |
| ssl1923 | G0:0052188 | <1e-4 | slr0238 | G0:0090304 | <1e-4 | ssl3291 | G0:0015077 | <1e-4 | slr0273 | G0:0044444 | <1e-4 | sl10243 | G0:0009058 | 0.0945 |
| slr0142 | G0:0001932 | <1e-4 | slr0082 | G0:0055114 | <1e-4 | ssr6003 | G0:0016462 | <1e-4 | slr2011 | G0:0044422 | <1e-4 | slr0913 | G0:0009058 | 0.0945 |
| ssl2420 | G0:0006220 | <1e-4 | sl10625 | G0:0009394 | <1e-4 | sl11702 | G0:0022803 | <1e-4 | ssr2553 | G0:0044444 | <1e-4 | sl10103 | G0:0003676 | 0.094  |
| sl10310 | G0:0090304 | <1e-4 | slr1378 | G0:0031323 | <1e-4 | ssl0350 | G0:0016818 | <1e-4 | sl11940 | G0:0044446 | <1e-4 | sl10238 | G0:0003676 | 0.094  |
| slr2119 | G0:0009117 | <1e-4 | sl11652 | G0:0048519 | <1e-4 | sl10995 | G0:0015293 | <1e-4 | slr0121 | G0:0005575 | <1e-4 | ssr2201 | G0:0003676 | 0.094  |
| sl10909 | G0:0006631 | <1e-4 | slr0607 | G0:0019362 | <1e-4 | ssr3304 | G0:0022890 | <1e-4 | slr1652 | G0:0044446 | <1e-4 | slr1565 | G0:0003676 | 0.094  |
| sl11355 | G0:0019751 | <1e-4 | sl11239 | G0:0016053 | <1e-4 | slr1590 | G0:0016741 | <1e-4 | sl11751 | G0:0005575 | <1e-4 | sl10763 | G0:0003676 | 0.094  |
| sl11173 | G0:0048523 | <1e-4 | slr1676 | G0:0044260 | <1e-4 | sl11570 | G0:0022857 | <1e-4 | ssr2551 | G0:0044444 | <1e-4 | slr0579 | G0:0003676 | 0.094  |
| sl11785 | G0:0051818 | <1e-4 | sl10847 | G0:0043648 | <1e-4 | slr0581 | G0:0008171 | <1e-4 | ssr1552 | G0:0043226 | <1e-4 | sl11775 | G0:0003676 | 0.094  |
| sl10496 | G0:0051234 | <1e-4 | sl11130 | G0:0034654 | <1e-4 | ssl5095 | G0:0015291 | <1e-4 | sl10872 | G0:0044444 | <1e-4 | slr2038 | G0:0003676 | 0.094  |
| slr1081 | G0:0034654 | <1e-4 | sl11773 | G0:0044260 | <1e-4 | slr1365 | G0:0016746 | <1e-4 | slr0619 | G0:0044422 | <1e-4 | slr0980 | G0:0003676 | 0.094  |
| sl12006 | G0:0019222 | <1e-4 | sl11442 | G0:0052188 | <1e-4 | slr0144 | G0:0016462 | <1e-4 | sl10614 | G0:0005575 | <1e-4 | sl10558 | G0:0003676 | 0.0934 |
| ssr6085 | G0:0006066 | <1e-4 | slr1959 | G0:0031640 | <1e-4 | slr1676 | G0:0016746 | <1e-4 | ssr1425 | G0:0044424 | <1e-4 | slr1800 | G0:0003676 | 0.0934 |
| slr1599 | G0:0051188 | <1e-4 | slr1571 | G0:0072522 | <1e-4 | slr0596 | G0:0022803 | <1e-4 | sl11834 | G0:0044422 | <1e-4 | ssl2996 | G0:0003676 | 0.0934 |
| slr0408 | G0:0046483 | <1e-4 | slr0273 | G0:0060255 | <1e-4 | slr0610 | G0:0043167 | <1e-4 | slr0209 | G0:0044464 | <1e-4 | slr1143 | G0:0003676 | 0.0934 |
| sl10803 | G0:0009262 | <1e-4 | ssl2595 | G0:0006163 | <1e-4 | ssr2551 | G0:0008171 | <1e-4 | sl10410 | G0:0005575 | <1e-4 | slr0589 | G0:0003676 | 0.0934 |
| slr1429 | G0:0050794 | <1e-4 | slr1365 | G0:0019752 | <1e-4 | ssr2787 | G0:0022890 | <1e-4 | sl15044 | G0:0044444 | <1e-4 | sl10732 | G0:0003676 | 0.0934 |
| ssr2439 | G0:0065007 | <1e-4 | sl11307 | G0:0009141 | <1e-4 | sl11751 | G0:0015267 | <1e-4 | ssr3409 | G0:0005575 | <1e-4 | sl10586 | G0:0003676 | 0.0934 |
| slr0813 | G0:0009056 | <1e-4 | sl10545 | G0:0072521 | <1e-4 | sl10412 | G0:0042623 | <1e-4 | slr0060 | G0:0005575 | <1e-4 | slr1847 | G0:0003676 | 0.0934 |
| sl11891 | G0:0016054 | <1e-4 | slr7083 | G0:0044281 | <1e-4 | sl11485 | G0:0015077 | <1e-4 | sl11380 | G0:0005575 | <1e-4 | slr0594 | G0:0003676 | 0.0934 |
| slr1660 | G0:0031323 | <1e-4 | sl11132 | G0:0009124 | <1e-4 | ssl1792 | G0:0005342 | <1e-4 | sl10371 | G0:0044422 | <1e-4 | sl10788 | G0:0003676 | 0.0934 |
| sl11573 | G0:0006732 | <1e-4 | slr0551 | G0:0050801 | <1e-4 | slr0888 | G0:0043167 | <1e-4 | sl17086 | G0:0005575 | <1e-4 | slr1865 | G0:0003676 | 0.0934 |
| ssr1256 | G0:0042455 | <1e-4 | ssl1520 | G0:0034641 | <1e-4 | sl11477 | G0:0016741 | <1e-4 | slr6106 | G0:0044444 | <1e-4 | slr1811 | G0:0003676 | 0.0934 |
| sl11751 | G0:0006631 | <1e-4 | sl10293 | G0:0006091 | <1e-4 | sl15030 | G0:0015405 | <1e-4 | slr1613 | G0:0044444 | <1e-4 | slr1385 | G0:0003676 | 0.0925 |
| sl10008 | G0:0090304 | <1e-4 | sl10804 | G0:0044260 | <1e-4 | slr0355 | G0:0022838 | <1e-4 | sl10188 | G0:0005575 | <1e-4 | slr2092 | G0:0003676 | 0.0925 |
| slr6072 | G0:0009309 | <1e-4 | ssl0312 | G0:0046483 | <1e-4 | slr6022 | G0:0022803 | <1e-4 | slr6006 | G0:0044444 | <1e-4 | slr0491 | G0:0003676 | 0.0925 |
| ssr2787 | G0:0016052 | <1e-4 | sl11186 | G0:0048878 | <1e-4 | sl10298 | G0:0022891 | <1e-4 | sl11925 | G0:0044422 | <1e-4 | slr1702 | G0:0003676 | 0.0925 |
| slr1959 | G0:0051188 | <1e-4 | sl10269 | G0:0051347 | <1e-4 | sl10478 | G0:0016817 | <1e-4 | sl16052 | G0:0044424 | <1e-4 | slr1215 | G0:0016787 | 0.0911 |
| sl17031 | G0:0052111 | <1e-4 | ssl0738 | G0:0048518 | <1e-4 | ssr6046 | G0:0016462 | <1e-4 | slr0551 | G0:0044446 | <1e-4 | sl10068 | G0:0016787 | 0.0911 |
| ssl3382 | G0:0050801 | <1e-4 | ssr6099 | G0:0051234 | <1e-4 | slr1753 | G0:0016741 | <1e-4 | slr0144 | G0:0044424 | <1e-4 | slr1603 | G0:0017111 | 0.0908 |
| sl10781 | G0:0052188 | <1e-4 | slr1866 | G0:0009259 | <1e-4 | ssr5117 | G0:0016817 | <1e-4 | slr1419 | G0:0044425 | <1e-4 | slr0810 | G0:0017111 | 0.0908 |
| slr1183 | G0:0055114 | <1e-4 | sl10160 | G0:0009150 | <1e-4 | slr1721 | G0:0015291 | <1e-4 | sl17078 | G0:0044446 | <1e-4 | sl10661 | G0:0017111 | 0.0908 |
| sl11203 | G0:0009199 | <1e-4 | sl10189 | G0:0009394 | <1e-4 | slr1474 | G0:0015405 | <1e-4 | slr1363 | G0:0044444 | <1e-4 | ssr2049 | G0:0017111 | 0.0908 |
| slr6080 | G0:0034641 | <1e-4 | slr2052 | G0:0006721 | <1e-4 | sl10513 | G0:0015291 | <1e-4 | slr1287 | G0:0005575 | <1e-4 | slr1702 | G0:0017111 | 0.0908 |
| ssr2422 | G0:0044271 | <1e-4 | slr0592 | G0:0019222 | <1e-4 | ssl5015 | G0:0043492 | <1e-4 | sl15128 | G0:0005575 | <1e-4 | ssr2843 | G0:0017111 | 0.0908 |
| ssr0761 | G0:0065007 | <1e-4 | slr1753 | G0:0019222 | <1e-4 | slr7073 | G0:0016746 | <1e-4 | sl11131 | G0:0044424 | <1e-4 | slr2092 | G0:0017111 | 0.0908 |
| sl10446 | G0:0009889 | <1e-4 | slr6065 | G0:0065007 | <1e-4 | sl11764 | G0:0015291 | <1e-4 | slr0337 | G0:0044446 | <1e-4 | slr0491 | G0:0017111 | 0.0908 |
| slr0907 | G0:0048878 | <1e-4 | ssr0759 | G0:0044271 | <1e-4 | sl11764 | G0:0016746 | <1e-4 | slr6101 | G0:0044464 | <1e-4 | ssr2142 | G0:0005215 | 0.0897 |
| slr0637 | G0:0090304 | <1e-4 | sl11640 | G0:0044106 | <1e-4 | sl11586 | G0:0015293 | <1e-4 | sl11528 | G0:0005575 | <1e-4 | slr1644 | G0:0005215 | 0.0897 |
| ssl1577 | G0:0009165 | <1e-4 | ssl2069 | G0:0008150 | <1e-4 | sl10944 | G0:0043167 | <1e-4 | slr1600 | G0:0044446 | <1e-4 | slr0380 | G0:0009058 | 0.0895 |
| sl10272 | G0:0009165 | <1e-4 | slr0801 | G0:0009260 | <1e-4 | sl11388 | G0:0015399 | <1e-4 | ssr2554 | G0:0043226 | <1e-4 | sl10406 | G0:0009058 | 0.0895 |
| ssr2998 | G0:0016053 | <1e-4 | slr1863 | G0:0071496 | <1e-4 | sl11040 | G0:0008171 | <1e-4 | sl10804 | G0:0044422 | <1e-4 | slr0262 | G0:0009058 | 0.0895 |
| sl11203 | G0:0044260 | <1e-4 | slr1169 | G0:0009987 | <1e-4 | slr0149 | G0:0015075 | <1e-4 | slr1474 | G0:0044424 | <1e-4 | slr0964 | G0:0009058 | 0.0895 |
| slr0770 | G0:0019637 | <1e-4 | ssl2420 | G0:0019219 | <1e-4 | slr1464 | G0:0043167 | <1e-4 | slr5112 | G0:0044425 | <1e-4 | ssl5095 | G0:0009058 | 0.0895 |
| slr0250 | G0:0046164 | <1e-4 | sl11131 | G0:0051818 | <1e-4 | slr0695 | G0:0022890 | <1e-4 | slr0398 | G0:0005575 | <1e-4 | slr1069 | G0:0009058 | 0.0895 |
| slr0039 | G0:0009161 | <1e-4 | sl11830 | G0:0008150 | <1e-4 | sl17043 | G0:0016741 | <1e-4 | slr7059 | G0:0044424 | <1e-4 | slr0407 | G0:0009058 | 0.0895 |
| slr1544 | G0:0052188 | <1e-4 | ssr2142 | G0:0016070 | <1e-4 | sl10837 | G0:0043167 | <1e-4 | slr0722 | G0:0044446 | <1e-4 | sl10886 | G0:0009058 | 0.0895 |
| sl10803 | G0:0044281 | <1e-4 | sl10572 | G0:0006163 | <1e-4 | slr5126 | G0:0022857 | <1e-4 | sl10488 | G0:0044446 | <1e-4 | slr1535 | G0:0009058 | 0.0895 |
| slr0423 | G0:0071554 | <1e-4 | slr2070 | G0:0009893 | <1e-4 | sg10002 | G0:0022838 | <1e-4 | sl10412 | G0:0043226 | <1e-4 | sl10775 | G0:0009058 | 0.0895 |
| slr0810 | G0:0009260 | <1e-4 | slr1114 | G0:0019752 | <1e-4 | ssr1258 | G0:0016817 | <1e-4 | slr1851 | G0:0044444 | <1e-4 | sl11863 | G0:0009058 | 0.0895 |
| slr6045 | G0:0009165 | <1e-4 | slr1778 | G0:0048522 | <1e-4 | slr1023 | G0:0016818 | <1e-4 | ssr0692 | G0:0044422 | <1e-4 | ssl8003 | G0:0009058 | 0.0895 |
| ssr6099 | G0:0018130 | <1e-4 | slr1104 | G0:0050801 | <1e-4 | sl11142 | G0:0016818 | <1e-4 | slr1266 | G0:0043226 | <1e-4 | ssl2920 | G0:0009058 | 0.0895 |
| slr1365 | G0:0006766 | <1e-4 | sl10272 | G0:0051716 | <1e-4 | sl15032 | G0:0022890 | <1e-4 | sl11086 | G0:0044464 | <1e-4 | slr1095 | G0:0009058 | 0.0895 |

|         |            |       |         |            |       |         |            |       |         |            |       |         |            |        |
|---------|------------|-------|---------|------------|-------|---------|------------|-------|---------|------------|-------|---------|------------|--------|
| ssr7017 | G0:0034641 | <1e-4 | s111714 | G0:0008610 | <1e-4 | s110008 | G0:0022836 | <1e-4 | s110242 | G0:0044424 | <1e-4 | slr1162 | G0:0009058 | 0.0895 |
| s111995 | G0:0009123 | <1e-4 | slr0476 | G0:0006793 | <1e-4 | slr1444 | G0:0016741 | <1e-4 | slr1998 | G0:0044444 | <1e-4 | s110742 | G0:0009058 | 0.0895 |
| slr2004 | G0:0044003 | <1e-4 | slr1790 | G0:0008610 | <1e-4 | s110098 | G0:0016746 | <1e-4 | slr0667 | G0:0044464 | <1e-4 | s111921 | G0:0009058 | 0.0895 |
| slr7094 | G0:0080090 | <1e-4 | s110688 | G0:0051171 | <1e-4 | slr6081 | G0:0015267 | <1e-4 | s110371 | G0:0005575 | <1e-4 | ss13383 | G0:0009058 | 0.0895 |
| slr0976 | G0:0043436 | <1e-4 | s110481 | G0:0052188 | <1e-4 | slr0192 | G0:0015267 | <1e-4 | slr0813 | G0:0044425 | <1e-4 | slr1534 | G0:0009058 | 0.0895 |
| s110854 | G0:0009308 | <1e-4 | slr6064 | G0:0009199 | <1e-4 | slr8044 | G0:0042623 | <1e-4 | slr1275 | G0:0044424 | <1e-4 | slr0151 | G0:0009058 | 0.0895 |
| s110023 | G0:0044106 | <1e-4 | slr0059 | G0:0050794 | <1e-4 | slr7071 | G0:0022832 | <1e-4 | slr0355 | G0:0044446 | <1e-4 | s110846 | G0:0009058 | 0.0895 |
| slr0784 | G0:0019752 | <1e-4 | s110361 | G0:0051347 | <1e-4 | slr0482 | G0:0015077 | <1e-4 | slr7101 | G0:0005575 | <1e-4 | s111062 | G0:0009058 | 0.0895 |
| slr1807 | G0:0009199 | <1e-4 | ssr5011 | G0:0008150 | <1e-4 | ssr1766 | G0:0016817 | <1e-4 | s117033 | G0:0043226 | <1e-4 | s110168 | G0:0009058 | 0.0895 |
| slr1681 | G0:0019751 | <1e-4 | s111344 | G0:0046164 | <1e-4 | s110756 | G0:0015291 | <1e-4 | slr1774 | G0:0005575 | <1e-4 | s110266 | G0:0009058 | 0.0895 |
| sgl0002 | G0:0006066 | <1e-4 | slr1977 | G0:0043933 | <1e-4 | s111251 | G0:0003674 | <1e-4 | slr0889 | G0:0043226 | <1e-4 | s110658 | G0:0009058 | 0.0895 |
| s111447 | G0:0018130 | <1e-4 | s111186 | G0:0051171 | <1e-4 | ss13829 | G0:0043167 | <1e-4 | slr1276 | G0:0044424 | <1e-4 | slr1768 | G0:0009058 | 0.0895 |
| s110189 | G0:0034660 | <1e-4 | s115063 | G0:0043549 | <1e-4 | slr1052 | G0:0022803 | <1e-4 | slr1533 | G0:0005575 | <1e-4 | ssr3410 | G0:0009058 | 0.0895 |
| ss12384 | G0:0009889 | <1e-4 | s110031 | G0:0051171 | <1e-4 | s110996 | G0:0015077 | <1e-4 | s110710 | G0:0044424 | <1e-4 | ssr2554 | G0:0009058 | 0.0895 |
| s117034 | G0:0051179 | <1e-4 | slr1571 | G0:0048878 | <1e-4 | s111285 | G0:0016462 | <1e-4 | slr6100 | G0:0043226 | <1e-4 | slr7058 | G0:0009058 | 0.0895 |
| slr0813 | G0:0044003 | <1e-4 | slr1964 | G0:0009123 | <1e-4 | slr2092 | G0:0015075 | <1e-4 | slr1450 | G0:0044424 | <1e-4 | slr1907 | G0:0009058 | 0.0895 |
| s111938 | G0:0034641 | <1e-4 | s110688 | G0:0033013 | <1e-4 | slr0654 | G0:0005342 | <1e-4 | slr0784 | G0:0044446 | <1e-4 | slr6015 | G0:0009058 | 0.0895 |
| s111054 | G0:0009056 | <1e-4 | ss15129 | G0:0006082 | <1e-4 | ssr3341 | G0:0015267 | <1e-4 | s111693 | G0:0044464 | <1e-4 | ss13451 | G0:0009058 | 0.0895 |
| slr1187 | G0:0044281 | <1e-4 | slr0318 | G0:0051186 | <1e-4 | ss11923 | G0:0022832 | <1e-4 | slr0376 | G0:0044425 | <1e-4 | ss15129 | G0:0009058 | 0.0895 |
| ssr5120 | G0:0034641 | <1e-4 | slr0655 | G0:0052111 | <1e-4 | s110397 | G0:0005342 | <1e-4 | slr1959 | G0:0044464 | <1e-4 | s111906 | G0:0009058 | 0.0895 |
| s111464 | G0:0019752 | <1e-4 | s111510 | G0:0043170 | <1e-4 | s111222 | G0:0016817 | <1e-4 | slr1726 | G0:0043226 | <1e-4 | slr0333 | G0:0009058 | 0.0895 |
| s110085 | G0:0009199 | <1e-4 | slr0398 | G0:0046907 | <1e-4 | ssr5074 | G0:0015291 | <1e-4 | slr0586 | G0:0005575 | <1e-4 | ssr0102 | G0:0009058 | 0.0895 |
| slr0780 | G0:0048519 | <1e-4 | s110710 | G0:0071496 | <1e-4 | s110586 | G0:0043492 | <1e-4 | s110095 | G0:0044446 | <1e-4 | slr0552 | G0:0009058 | 0.0895 |
| slr0765 | G0:0045184 | <1e-4 | s110242 | G0:0009260 | <1e-4 | ssr6083 | G0:0016462 | <1e-4 | s111680 | G0:0005575 | <1e-4 | s110284 | G0:0009058 | 0.0895 |
| slr0654 | G0:0051234 | <1e-4 | slr1087 | G0:0009124 | <1e-4 | slr6015 | G0:0042623 | <1e-4 | ss11046 | G0:0044425 | <1e-4 | slr0590 | G0:0005215 | 0.0846 |
| ss10483 | G0:0006811 | <1e-4 | s111601 | G0:0048878 | <1e-4 | s111447 | G0:0060089 | <1e-4 | s111832 | G0:0044444 | <1e-4 | s110160 | G0:0005215 | 0.0846 |
| slr0588 | G0:0044106 | <1e-4 | slr6091 | G0:0034654 | <1e-4 | slr2027 | G0:0015267 | <1e-4 | ss10352 | G0:0044444 | <1e-4 | slr0813 | G0:0005215 | 0.0846 |
| slr0407 | G0:0043549 | <1e-4 | slr0514 | G0:0051171 | <1e-4 | s110888 | G0:0016741 | <1e-4 | slr7081 | G0:0044464 | <1e-4 | slr7071 | G0:0005215 | 0.0846 |
| s110735 | G0:0043549 | <1e-4 | s111528 | G0:0051246 | <1e-4 | ssr6085 | G0:0003674 | <1e-4 | s110898 | G0:0044422 | <1e-4 | s117090 | G0:0005215 | 0.0846 |
| s118004 | G0:0042455 | <1e-4 | ssr0102 | G0:0009056 | <1e-4 | slr6029 | G0:0022857 | <1e-4 | ss15100 | G0:0044444 | <1e-4 | slr2071 | G0:0005215 | 0.0846 |
| s110508 | G0:0071841 | <1e-4 | slr0948 | G0:0006733 | <1e-4 | slr1103 | G0:0015267 | <1e-4 | slr1104 | G0:0044425 | <1e-4 | slr1507 | G0:0005215 | 0.0846 |
| slr1342 | G0:0009262 | <1e-4 | slr0695 | G0:0051716 | <1e-4 | slr0049 | G0:0022892 | <1e-4 | ssr3154 | G0:0043226 | <1e-4 | ss15068 | G0:0005215 | 0.0846 |
| s110853 | G0:0043648 | <1e-4 | slr1619 | G0:0044106 | <1e-4 | slr0821 | G0:0003674 | <1e-4 | s118032 | G0:0044422 | <1e-4 | s115067 | G0:0005215 | 0.0846 |
| s110858 | G0:0009394 | <1e-4 | s116054 | G0:0048878 | <1e-4 | s111940 | G0:0015405 | <1e-4 | s111773 | G0:0005575 | <1e-4 | s110765 | G0:0005215 | 0.0846 |
| ss10832 | G0:0006721 | <1e-4 | ssr2755 | G0:0071842 | <1e-4 | slr1864 | G0:0015267 | <1e-4 | slr1025 | G0:0005575 | <1e-4 | slr1628 | G0:0005215 | 0.0846 |
| slr1927 | G0:0009117 | <1e-4 | ss10787 | G0:0051246 | <1e-4 | s110861 | G0:0015077 | <1e-4 | slr0238 | G0:0044464 | <1e-4 | slr6087 | G0:0005215 | 0.0846 |
| s110147 | G0:0044248 | <1e-4 | slr7012 | G0:0005996 | <1e-4 | s111131 | G0:0015399 | <1e-4 | slr1209 | G0:0005575 | <1e-4 | ss10467 | G0:0005215 | 0.0846 |
| slr0957 | G0:0050789 | <1e-4 | s117047 | G0:0090304 | <1e-4 | s110479 | G0:0016818 | <1e-4 | s111109 | G0:0044464 | <1e-4 | s111784 | G0:0005215 | 0.0846 |
| slr1450 | G0:0043436 | <1e-4 | slr0013 | G0:0009199 | <1e-4 | slr0356 | G0:0015075 | <1e-4 | slr6101 | G0:0044422 | <1e-4 | ssr7084 | G0:0005215 | 0.0846 |
| slr1342 | G0:0009126 | <1e-4 | s111956 | G0:0016054 | <1e-4 | s111262 | G0:0015293 | <1e-4 | ss10353 | G0:0005575 | <1e-4 | s117028 | G0:0005215 | 0.0846 |
| ssr5074 | G0:0044260 | <1e-4 | slr6006 | G0:0051818 | <1e-4 | ssr6019 | G0:0022838 | <1e-4 | slr1186 | G0:0043226 | <1e-4 | s111340 | G0:0005215 | 0.0846 |
| slr7099 | G0:0031640 | <1e-4 | s111151 | G0:0046483 | <1e-4 | s110980 | G0:0022832 | <1e-4 | slr0168 | G0:0044446 | <1e-4 | slr6033 | G0:0005215 | 0.0846 |
| ss15025 | G0:0072524 | <1e-4 | ssr6083 | G0:0071496 | <1e-4 | slr0404 | G0:0043492 | <1e-4 | slr1977 | G0:0005575 | <1e-4 | slr5053 | G0:0005215 | 0.0846 |
| slr1394 | G0:0065007 | <1e-4 | s110376 | G0:0031640 | <1e-4 | s110925 | G0:0015293 | <1e-4 | ssr1041 | G0:0005575 | <1e-4 | slr0241 | G0:0005215 | 0.0846 |
| slr1816 | G0:0009126 | <1e-4 | slr2084 | G0:0006766 | <1e-4 | slr2119 | G0:0005342 | <1e-4 | slr0569 | G0:0044424 | <1e-4 | s110496 | G0:0005215 | 0.0846 |
| s110761 | G0:0046394 | <1e-4 | slr1287 | G0:0080090 | <1e-4 | s110888 | G0:0022838 | <1e-4 | ss12384 | G0:0044446 | <1e-4 | ss12384 | G0:0005215 | 0.0846 |
| slr1419 | G0:0006721 | <1e-4 | slr0602 | G0:0071554 | <1e-4 | slr1544 | G0:0015399 | <1e-4 | s111142 | G0:0044422 | <1e-4 | ssr2553 | G0:0005215 | 0.0846 |
| s110230 | G0:0009124 | <1e-4 | slr1699 | G0:0080090 | <1e-4 | slr0587 | G0:0042623 | <1e-4 | slr1576 | G0:0005575 | <1e-4 | slr1394 | G0:0005215 | 0.0846 |
| s118004 | G0:0072527 | <1e-4 | s111024 | G0:0031640 | <1e-4 | s111571 | G0:0015267 | <1e-4 | slr0755 | G0:0043226 | <1e-4 | s110376 | G0:0005215 | 0.0846 |
| slr1413 | G0:0031326 | <1e-4 | ssr0657 | G0:0052188 | <1e-4 | s117050 | G0:0015291 | <1e-4 | slr0670 | G0:0044425 | <1e-4 | ss18028 | G0:0005215 | 0.0846 |
| slr1152 | G0:0048523 | <1e-4 | s111586 | G0:0043933 | <1e-4 | s111350 | G0:0022890 | <1e-4 | slr1222 | G0:0005575 | <1e-4 | s118035 | G0:0005215 | 0.0846 |
| slr1107 | G0:0043549 | <1e-4 | slr0345 | G0:0051188 | <1e-4 | slr0092 | G0:0015293 | <1e-4 | s111527 | G0:0044446 | <1e-4 | slr0273 | G0:0005215 | 0.0846 |
| ss11520 | G0:0019362 | <1e-4 | slr1127 | G0:0048522 | <1e-4 | slr1721 | G0:0022892 | <1e-4 | s110044 | G0:0043226 | <1e-4 | ss15113 | G0:0005215 | 0.0846 |
| slr2049 | G0:0009126 | <1e-4 | s111509 | G0:0051188 | <1e-4 | ss13692 | G0:0043492 | <1e-4 | s111736 | G0:0005575 | <1e-4 | slr0728 | G0:0005215 | 0.0846 |

|         |            |       |         |            |       |         |            |       |         |            |       |         |            |        |
|---------|------------|-------|---------|------------|-------|---------|------------|-------|---------|------------|-------|---------|------------|--------|
| slr7100 | G0:0009259 | <1e-4 | slr1676 | G0:0044275 | <1e-4 | sl10266 | G0:0015399 | <1e-4 | slr2121 | G0:0005575 | <1e-4 | slr2004 | G0:0005215 | 0.0846 |
| slr6022 | G0:0033013 | <1e-4 | slr1690 | G0:0048523 | <1e-4 | slr1207 | G0:0015291 | <1e-4 | slr0455 | G0:0044464 | <1e-4 | ss17038 | G0:0005215 | 0.0846 |
| slr0337 | G0:0006220 | <1e-4 | sl11021 | G0:0016053 | <1e-4 | ssr2843 | G0:0060089 | <1e-4 | sl10007 | G0:0044425 | <1e-4 | sl10044 | G0:0005215 | 0.0846 |
| sl17090 | G0:0072522 | <1e-4 | slr0981 | G0:0044106 | <1e-4 | slr0144 | G0:0022838 | <1e-4 | slr7101 | G0:0044422 | <1e-4 | sl17033 | G0:0005215 | 0.0846 |
| slr1223 | G0:0042455 | <1e-4 | sl11062 | G0:0072524 | <1e-4 | ssr6020 | G0:0016818 | <1e-4 | slr6022 | G0:0044444 | <1e-4 | ssr1425 | G0:0005215 | 0.0846 |
| slr1376 | G0:0043412 | <1e-4 | slr0404 | G0:0006082 | <1e-4 | sl10595 | G0:0015399 | <1e-4 | slr7080 | G0:0044422 | <1e-4 | slr5102 | G0:0005215 | 0.0846 |
| sl11265 | G0:0009309 | <1e-4 | sl11062 | G0:0016053 | <1e-4 | ssr5092 | G0:0022891 | <1e-4 | slr7012 | G0:0044422 | <1e-4 | sl10162 | G0:0005215 | 0.0846 |
| slr0360 | G0:0072521 | <1e-4 | slr1935 | G0:0010556 | <1e-4 | ssr5117 | G0:0022857 | <1e-4 | sl10785 | G0:0044464 | <1e-4 | slr1450 | G0:0005215 | 0.0846 |
| sl10846 | G0:0006631 | <1e-4 | sl10931 | G0:0034660 | <1e-4 | sl11307 | G0:0016817 | <1e-4 | ssr1552 | G0:0044425 | <1e-4 | slr7099 | G0:0005215 | 0.0846 |
| slr1862 | G0:0051347 | <1e-4 | slr0146 | G0:0034654 | <1e-4 | sl10888 | G0:0022857 | <1e-4 | ssr1473 | G0:0043226 | <1e-4 | ssr6027 | G0:0005215 | 0.0846 |
| sl11262 | G0:0034641 | <1e-4 | slr6067 | G0:0009141 | <1e-4 | slr1053 | G0:0043167 | <1e-4 | slr7059 | G0:0005575 | <1e-4 | sl11068 | G0:0005215 | 0.0846 |
| slr0689 | G0:0044282 | <1e-4 | sl11476 | G0:0009889 | <1e-4 | slr0325 | G0:0022857 | <1e-4 | slr1391 | G0:0005575 | <1e-4 | slr0771 | G0:0005215 | 0.0846 |
| sl10096 | G0:0016054 | <1e-4 | sl15090 | G0:0055086 | <1e-4 | slr0496 | G0:0015267 | <1e-4 | slr5087 | G0:0043226 | <1e-4 | slr1206 | G0:0005215 | 0.0846 |
| sl10827 | G0:0006091 | <1e-4 | slr1023 | G0:0048878 | <1e-4 | slr1577 | G0:0015077 | <1e-4 | slr7100 | G0:0043226 | <1e-4 | slr2070 | G0:0005215 | 0.0846 |
| sl11769 | G0:0006732 | <1e-4 | slr2049 | G0:0009262 | <1e-4 | sl11400 | G0:0022836 | <1e-4 | slr2011 | G0:0044444 | <1e-4 | slr5112 | G0:0005215 | 0.0846 |
| sl10424 | G0:0009889 | <1e-4 | slr2010 | G0:0046907 | <1e-4 | slr1470 | G0:0022890 | <1e-4 | slr1436 | G0:0044444 | <1e-4 | sl10939 | G0:0005215 | 0.0846 |
| slr6005 | G0:0090304 | <1e-4 | slr0699 | G0:0071496 | <1e-4 | ss10750 | G0:0016746 | <1e-4 | sl11542 | G0:0044464 | <1e-4 | slr1290 | G0:0005215 | 0.0846 |
| ss13382 | G0:0050794 | <1e-4 | sl11570 | G0:0009309 | <1e-4 | slr1957 | G0:0022803 | <1e-4 | ss17022 | G0:0044444 | <1e-4 | slr7100 | G0:0005215 | 0.0846 |
| sl11938 | G0:0009126 | <1e-4 | sl11252 | G0:0006082 | <1e-4 | slr0364 | G0:0022890 | <1e-4 | slr0545 | G0:0044424 | <1e-4 | slr1114 | G0:0005215 | 0.0846 |
| sl11942 | G0:0051171 | <1e-4 | slr2105 | G0:0051716 | <1e-4 | sl11542 | G0:0015291 | <1e-4 | slr1773 | G0:0005575 | <1e-4 | ssr6078 | G0:0005215 | 0.0846 |
| ss15007 | G0:0046164 | <1e-4 | sl11024 | G0:0080090 | <1e-4 | slr0442 | G0:0015293 | <1e-4 | slr1363 | G0:0044464 | <1e-4 | sl11049 | G0:0005215 | 0.0846 |
| ssr2754 | G0:0022607 | <1e-4 | slr0731 | G0:0006066 | <1e-4 | sl10602 | G0:0016462 | <1e-4 | sl11132 | G0:0044425 | <1e-4 | ssr1041 | G0:0005215 | 0.0846 |
| slr5126 | G0:0042455 | <1e-4 | ssr3189 | G0:0046907 | <1e-4 | slr0729 | G0:0003674 | <1e-4 | sl11911 | G0:0005575 | <1e-4 | sl11640 | G0:0005215 | 0.0846 |
| slr5021 | G0:0009123 | <1e-4 | sl10710 | G0:0009987 | <1e-4 | slr0376 | G0:0022832 | <1e-4 | slr0104 | G0:0044444 | <1e-4 | sl17069 | G0:0005215 | 0.0846 |
| ss15027 | G0:0050896 | <1e-4 | slr0919 | G0:0009263 | <1e-4 | ss12148 | G0:0015405 | <1e-4 | slr1676 | G0:0005575 | <1e-4 | ss11263 | G0:0005215 | 0.0846 |
| slr7059 | G0:0034660 | <1e-4 | sl11086 | G0:0072522 | <1e-4 | slr0575 | G0:0015399 | <1e-4 | sl17034 | G0:0044464 | <1e-4 | slr1627 | G0:0005215 | 0.0846 |
| sl10863 | G0:0046164 | <1e-4 | slr5111 | G0:0031323 | <1e-4 | slr0440 | G0:0003674 | <1e-4 | sl10005 | G0:0005575 | <1e-4 | slr2049 | G0:0005215 | 0.0846 |
| slr0810 | G0:0044282 | <1e-4 | sl11541 | G0:0031326 | <1e-4 | slr5101 | G0:0015293 | <1e-4 | slr1535 | G0:0044422 | <1e-4 | sl11164 | G0:0005215 | 0.0846 |
| slr6094 | G0:0019219 | <1e-4 | sl18001 | G0:0006066 | <1e-4 | sl11411 | G0:0042623 | <1e-4 | slr1143 | G0:0044464 | <1e-4 | slr1780 | G0:0005215 | 0.0846 |
| sl11060 | G0:0006793 | <1e-4 | sl10274 | G0:0050789 | <1e-4 | sl11222 | G0:0022803 | <1e-4 | slr0199 | G0:0005575 | <1e-4 | ss10410 | G0:0005215 | 0.0846 |
| sl10191 | G0:0034654 | <1e-4 | slr1391 | G0:0042451 | <1e-4 | slr1464 | G0:0015405 | <1e-4 | sl18040 | G0:0044425 | <1e-4 | slr6081 | G0:0005215 | 0.0846 |
| sl11040 | G0:0055082 | <1e-4 | slr7096 | G0:0006082 | <1e-4 | slr1513 | G0:0022857 | <1e-4 | sl11956 | G0:0044444 | <1e-4 | sl10847 | G0:0005215 | 0.0846 |
| ssr2962 | G0:0008610 | <1e-4 | slr0976 | G0:0009260 | <1e-4 | sl17070 | G0:0022838 | <1e-4 | sl17087 | G0:0044425 | <1e-4 | slr0521 | G0:0005215 | 0.0846 |
| sl10230 | G0:0072521 | <1e-4 | ss12138 | G0:0050801 | <1e-4 | sl18004 | G0:0022890 | <1e-4 | sl10157 | G0:0044425 | <1e-4 | slr0416 | G0:0005215 | 0.0846 |
| slr7058 | G0:0071840 | <1e-4 | slr0299 | G0:0010556 | <1e-4 | sl11884 | G0:0005342 | <1e-4 | sl11485 | G0:0043226 | <1e-4 | ssr0336 | G0:0005215 | 0.0846 |
| ssr3189 | G0:0051188 | <1e-4 | slr1104 | G0:0042451 | <1e-4 | ssr3129 | G0:0015267 | <1e-4 | slr0765 | G0:0005575 | <1e-4 | ss13549 | G0:0005215 | 0.0846 |
| slr1563 | G0:0009263 | <1e-4 | ss11792 | G0:0042451 | <1e-4 | slr1752 | G0:0015291 | <1e-4 | slr0195 | G0:0044424 | <1e-4 | sl15030 | G0:0005215 | 0.0846 |
| slr2052 | G0:0009263 | <1e-4 | sl18007 | G0:0044271 | <1e-4 | slr1721 | G0:0022832 | <1e-4 | ssr3304 | G0:0044424 | <1e-4 | slr1951 | G0:0005215 | 0.0846 |
| slr6080 | G0:0050896 | <1e-4 | slr1266 | G0:0045184 | <1e-4 | slr1557 | G0:0016741 | <1e-4 | slr7102 | G0:0005575 | <1e-4 | slr0709 | G0:0005215 | 0.0846 |
| sl10985 | G0:0051716 | <1e-4 | slr0023 | G0:0009987 | <1e-4 | ss13291 | G0:0060089 | <1e-4 | sl10167 | G0:0005575 | <1e-4 | slr0730 | G0:0005215 | 0.0846 |
| sl10284 | G0:0009117 | <1e-4 | slr0333 | G0:0009309 | <1e-4 | slr0059 | G0:0043167 | <1e-4 | sl10355 | G0:0044422 | <1e-4 | slr0325 | G0:0005215 | 0.0846 |
| slr1127 | G0:0051716 | <1e-4 | sl10678 | G0:0009309 | <1e-4 | slr0919 | G0:0022892 | <1e-4 | slr7100 | G0:0044424 | <1e-4 | sl11834 | G0:0005215 | 0.0846 |
| slr0609 | G0:0008150 | <1e-4 | slr1568 | G0:0006766 | <1e-4 | slr1484 | G0:0016462 | <1e-4 | slr0668 | G0:0044422 | <1e-4 | ss15103 | G0:0005215 | 0.0846 |
| ss12717 | G0:0051818 | <1e-4 | slr1917 | G0:0031326 | <1e-4 | slr0702 | G0:0015399 | <1e-4 | sl10752 | G0:0005575 | <1e-4 | slr6103 | G0:0005215 | 0.0846 |
| ss15096 | G0:0043436 | <1e-4 | slr0907 | G0:0031323 | <1e-4 | sl10854 | G0:0022891 | <1e-4 | slr0064 | G0:0044425 | <1e-4 | slr0634 | G0:0005215 | 0.0846 |
| slr0594 | G0:0050801 | <1e-4 | sl11166 | G0:0043170 | <1e-4 | slr1847 | G0:0022832 | <1e-4 | slr1107 | G0:0005575 | <1e-4 | sl18011 | G0:0005215 | 0.0846 |
| ssr2333 | G0:0043933 | <1e-4 | slr5112 | G0:0009117 | <1e-4 | sl11240 | G0:0022836 | <1e-4 | sl10752 | G0:0044424 | <1e-4 | sl10098 | G0:0005215 | 0.0846 |
| slr6071 | G0:0009259 | <1e-4 | sl18004 | G0:0009263 | <1e-4 | slr0249 | G0:0016741 | <1e-4 | slr1068 | G0:0044422 | <1e-4 | slr7094 | G0:0005215 | 0.0846 |
| slr1470 | G0:0031323 | <1e-4 | slr0650 | G0:0043412 | <1e-4 | slr0483 | G0:0022838 | <1e-4 | sl10811 | G0:0044444 | <1e-4 | ss12069 | G0:0005215 | 0.0846 |
| slr1915 | G0:0048523 | <1e-4 | slr0818 | G0:0009987 | <1e-4 | slr0326 | G0:0015291 | <1e-4 | sl10639 | G0:0044425 | <1e-4 | ss15108 | G0:0005215 | 0.0846 |
| sl15033 | G0:0065007 | <1e-4 | sl17055 | G0:0071554 | <1e-4 | ss11377 | G0:0016818 | <1e-4 | slr1865 | G0:0044422 | <1e-4 | slr1624 | G0:0005215 | 0.0846 |
| slr7101 | G0:0071840 | <1e-4 | sl10861 | G0:0048518 | <1e-4 | sl10479 | G0:0003674 | <1e-4 | sl11581 | G0:0044444 | <1e-4 | slr1681 | G0:0005215 | 0.0846 |
| sl11738 | G0:0072524 | <1e-4 | sl10980 | G0:0009987 | <1e-4 | slr1911 | G0:0015293 | <1e-4 | ssr5074 | G0:0044444 | <1e-4 | slr1087 | G0:0005215 | 0.0846 |
| sl10787 | G0:0009056 | <1e-4 | slr1862 | G0:0031640 | <1e-4 | slr0109 | G0:0022857 | <1e-4 | slr0729 | G0:0043226 | <1e-4 | slr1816 | G0:0005215 | 0.0846 |

|         |            |       |         |            |       |         |            |       |         |            |       |         |            |        |
|---------|------------|-------|---------|------------|-------|---------|------------|-------|---------|------------|-------|---------|------------|--------|
| slr1611 | G0:0005996 | <1e-4 | slr0871 | G0:0044282 | <1e-4 | s111949 | G0:0015291 | <1e-4 | s110269 | G0:0044425 | <1e-4 | s111158 | G0:0005215 | 0.0846 |
| slr1177 | G0:0006631 | <1e-4 | slr1900 | G0:0044260 | <1e-4 | slr1362 | G0:0015405 | <1e-4 | ssr0332 | G0:0005575 | <1e-4 | slr1174 | G0:0005215 | 0.0846 |
| slr0483 | G0:0033013 | <1e-4 | s110609 | G0:0009059 | <1e-4 | s111021 | G0:0042623 | <1e-4 | ssr3402 | G0:0044424 | <1e-4 | slr0667 | G0:0005215 | 0.0846 |
| slr2073 | G0:0044271 | <1e-4 | s110167 | G0:0009141 | <1e-4 | slr0725 | G0:0022838 | <1e-4 | slr0552 | G0:0044425 | <1e-4 | s110031 | G0:0005215 | 0.0846 |
| s111240 | G0:0009142 | <1e-4 | s111926 | G0:0043933 | <1e-4 | slr1362 | G0:0005342 | <1e-4 | s118002 | G0:0044446 | <1e-4 | s111570 | G0:0005215 | 0.0846 |
| slr1128 | G0:0034641 | <1e-4 | slr0731 | G0:0006811 | <1e-4 | s111902 | G0:0005342 | <1e-4 | ssr0536 | G0:0005575 | <1e-4 | s117077 | G0:0005215 | 0.0846 |
| s110641 | G0:0009059 | <1e-4 | slr1513 | G0:0010556 | <1e-4 | s110148 | G0:0022803 | <1e-4 | s111632 | G0:0005575 | <1e-4 | slr0039 | G0:0005215 | 0.0846 |
| slr0959 | G0:0019222 | <1e-4 | s110008 | G0:0009309 | <1e-4 | slr0358 | G0:0016817 | <1e-4 | slr1915 | G0:0044446 | <1e-4 | ss17074 | G0:0005215 | 0.0846 |
| slr0468 | G0:0044271 | <1e-4 | ss15103 | G0:0043170 | <1e-4 | slr0313 | G0:0015267 | <1e-4 | slr2052 | G0:0044425 | <1e-4 | slr0699 | G0:0005215 | 0.0846 |
| s111433 | G0:0006732 | <1e-4 | slr5017 | G0:0009124 | <1e-4 | s115034 | G0:0015293 | <1e-4 | slr0232 | G0:0044425 | <1e-4 | slr5127 | G0:0005215 | 0.0846 |
| ssr0109 | G0:0050794 | <1e-4 | s111532 | G0:0009124 | <1e-4 | s110749 | G0:0015075 | <1e-4 | ssr2975 | G0:0044425 | <1e-4 | s111464 | G0:0005215 | 0.0846 |
| s110505 | G0:0042180 | <1e-4 | s110446 | G0:0009260 | <1e-4 | s110266 | G0:0022857 | <1e-4 | slr1406 | G0:0044444 | <1e-4 | ss11918 | G0:0005215 | 0.0846 |
| s111658 | G0:0009260 | <1e-4 | s110939 | G0:0019222 | <1e-4 | slr0211 | G0:0015293 | <1e-4 | slr1053 | G0:0044424 | <1e-4 | ssr7093 | G0:0005215 | 0.0846 |
| s115067 | G0:0055086 | <1e-4 | s110149 | G0:0071842 | <1e-4 | slr6101 | G0:0022838 | <1e-4 | slr0519 | G0:0044424 | <1e-4 | ssr2972 | G0:0005215 | 0.0846 |
| slr1415 | G0:0018130 | <1e-4 | s110505 | G0:0048522 | <1e-4 | s111714 | G0:0022890 | <1e-4 | s110647 | G0:0044446 | <1e-4 | ssr5011 | G0:0005215 | 0.0846 |
| slr1415 | G0:0006576 | <1e-4 | s111485 | G0:0001932 | <1e-4 | s110488 | G0:0043492 | <1e-4 | s111882 | G0:0005575 | <1e-4 | ss11552 | G0:0005215 | 0.0846 |
| slr6013 | G0:0006066 | <1e-4 | slr1809 | G0:0051188 | <1e-4 | s110414 | G0:0015077 | <1e-4 | slr1721 | G0:0044424 | <1e-4 | s111289 | G0:0005215 | 0.0846 |
| slr6074 | G0:0010468 | <1e-4 | slr1383 | G0:0019751 | <1e-4 | s110996 | G0:0022836 | <1e-4 | s110354 | G0:0044422 | <1e-4 | slr6068 | G0:0005215 | 0.0846 |
| ssr2439 | G0:0009308 | <1e-4 | slr0325 | G0:0034654 | <1e-4 | slr5077 | G0:0022832 | <1e-4 | ssr5120 | G0:0005575 | <1e-4 | s110678 | G0:0005215 | 0.0846 |
| slr0789 | G0:0071496 | <1e-4 | s110539 | G0:0006811 | <1e-4 | s117087 | G0:0022803 | <1e-4 | s110508 | G0:0044424 | <1e-4 | slr0181 | G0:0005215 | 0.0846 |
| slr2011 | G0:0009123 | <1e-4 | ss10294 | G0:0044003 | <1e-4 | slr1186 | G0:0043492 | <1e-4 | slr0865 | G0:0043226 | <1e-4 | slr1944 | G0:0005215 | 0.0846 |
| s111131 | G0:0051188 | <1e-4 | s110609 | G0:0009142 | <1e-4 | slr0606 | G0:0022857 | <1e-4 | slr1438 | G0:0005575 | <1e-4 | s118027 | G0:0005215 | 0.0846 |
| slr0634 | G0:0006793 | <1e-4 | s111921 | G0:0065007 | <1e-4 | s111344 | G0:0042623 | <1e-4 | ssr2553 | G0:0044425 | <1e-4 | ss17022 | G0:0005215 | 0.0846 |
| slr1162 | G0:0006220 | <1e-4 | slr0503 | G0:0009132 | <1e-4 | ss12996 | G0:0016746 | <1e-4 | slr1667 | G0:0044424 | <1e-4 | s111373 | G0:0005215 | 0.0846 |
| ssr5121 | G0:0016054 | <1e-4 | ss17038 | G0:0034641 | <1e-4 | slr1681 | G0:0022891 | <1e-4 | slr0058 | G0:0044424 | <1e-4 | slr1394 | G0:0000166 | 0.0842 |
| s111071 | G0:0019752 | <1e-4 | slr1263 | G0:0071496 | <1e-4 | slr1809 | G0:0022892 | <1e-4 | slr2032 | G0:0044444 | <1e-4 | slr0725 | G0:0000166 | 0.0842 |
| s117078 | G0:0009150 | <1e-4 | s111191 | G0:0051179 | <1e-4 | slr6049 | G0:0060089 | <1e-4 | s110487 | G0:0044425 | <1e-4 | slr0273 | G0:0000166 | 0.0842 |
| slr1660 | G0:0009259 | <1e-4 | slr1875 | G0:0006082 | <1e-4 | slr0592 | G0:0016817 | <1e-4 | slr6038 | G0:0044425 | <1e-4 | s115030 | G0:0000166 | 0.0842 |
| slr6065 | G0:0046483 | <1e-4 | s110702 | G0:0009150 | <1e-4 | slr0060 | G0:0022836 | <1e-4 | slr1025 | G0:0044425 | <1e-4 | s110157 | G0:0000166 | 0.0842 |
| s111680 | G0:0044260 | <1e-4 | s110513 | G0:0006732 | <1e-4 | slr6004 | G0:0015405 | <1e-4 | ssr0761 | G0:0005575 | <1e-4 | ss15103 | G0:0000166 | 0.0842 |
| slr0821 | G0:0055082 | <1e-4 | ssr2047 | G0:0009893 | <1e-4 | slr0964 | G0:0022832 | <1e-4 | slr2084 | G0:0043226 | <1e-4 | s111714 | G0:0000166 | 0.0842 |
| slr1535 | G0:0051818 | <1e-4 | slr0208 | G0:0019362 | <1e-4 | slr1407 | G0:0022832 | <1e-4 | s111250 | G0:0044446 | <1e-4 | s111609 | G0:0000166 | 0.0842 |
| slr7015 | G0:0009260 | <1e-4 | s111095 | G0:0006091 | <1e-4 | slr0818 | G0:0043167 | <1e-4 | s110898 | G0:0043226 | <1e-4 | s110372 | G0:0000166 | 0.0842 |
| s111995 | G0:0051171 | <1e-4 | s111949 | G0:0071841 | <1e-4 | slr1812 | G0:0005342 | <1e-4 | ss15091 | G0:0044444 | <1e-4 | ssr5074 | G0:0000166 | 0.0842 |
| ss13692 | G0:0019222 | <1e-4 | s111960 | G0:0052111 | <1e-4 | slr5024 | G0:0016818 | <1e-4 | slr6009 | G0:0044422 | <1e-4 | s115128 | G0:0000166 | 0.0842 |
| s110098 | G0:0010468 | <1e-4 | s110864 | G0:0044003 | <1e-4 | s111775 | G0:0022890 | <1e-4 | s111289 | G0:0005575 | <1e-4 | s111717 | G0:0000166 | 0.0842 |
| s110085 | G0:0055086 | <1e-4 | slr7014 | G0:0009259 | <1e-4 | slr1032 | G0:0015267 | <1e-4 | slr1215 | G0:0044464 | <1e-4 | s115067 | G0:0000166 | 0.0842 |
| slr1215 | G0:0071840 | <1e-4 | slr1083 | G0:0009308 | <1e-4 | s111072 | G0:0015405 | <1e-4 | ss15025 | G0:0044425 | <1e-4 | slr7060 | G0:0000166 | 0.0842 |
| ssr3571 | G0:0005996 | <1e-4 | s110658 | G0:0006793 | <1e-4 | s117089 | G0:0003674 | <1e-4 | s111352 | G0:0044464 | <1e-4 | s111495 | G0:0000166 | 0.0842 |
| slr1956 | G0:0052188 | <1e-4 | ss11520 | G0:0046164 | <1e-4 | s111995 | G0:0015077 | <1e-4 | s111164 | G0:0005575 | <1e-4 | s110793 | G0:0000166 | 0.0842 |
| slr1670 | G0:0006720 | <1e-4 | s110096 | G0:0009991 | <1e-4 | slr0596 | G0:0016746 | <1e-4 | ss10109 | G0:0044422 | <1e-4 | s118011 | G0:0000166 | 0.0842 |
| slr0168 | G0:0009394 | <1e-4 | slr5017 | G0:0043648 | <1e-4 | slr0241 | G0:0042623 | <1e-4 | slr1415 | G0:0005575 | <1e-4 | ssr3572 | G0:0000166 | 0.0842 |
| slr0272 | G0:0090304 | <1e-4 | s110932 | G0:0009161 | <1e-4 | slr0670 | G0:0015075 | <1e-4 | s110216 | G0:0005575 | <1e-4 | s111698 | G0:0000166 | 0.0842 |
| slr1951 | G0:0009144 | <1e-4 | s115067 | G0:0044281 | <1e-4 | slr0398 | G0:0016462 | <1e-4 | slr6088 | G0:0044425 | <1e-4 | ssr6019 | G0:0000166 | 0.0842 |
| s111761 | G0:0009057 | <1e-4 | slr1186 | G0:0009141 | <1e-4 | ssr1552 | G0:0005342 | <1e-4 | s111658 | G0:0044422 | <1e-4 | ss17045 | G0:0000166 | 0.0842 |
| slr1170 | G0:0009987 | <1e-4 | ssr6030 | G0:0046907 | <1e-4 | s110274 | G0:0043492 | <1e-4 | slr1530 | G0:0043226 | <1e-4 | ss17048 | G0:0000166 | 0.0842 |
| slr0634 | G0:0009309 | <1e-4 | slr6033 | G0:0046164 | <1e-4 | slr0204 | G0:0003674 | <1e-4 | s110586 | G0:0044424 | <1e-4 | slr1327 | G0:0000166 | 0.0842 |
| s111542 | G0:0046907 | <1e-4 | slr2071 | G0:0019752 | <1e-4 | slr1789 | G0:0022890 | <1e-4 | slr0262 | G0:0043226 | <1e-4 | ssr6078 | G0:0000166 | 0.0842 |
| s111315 | G0:0071496 | <1e-4 | s110361 | G0:0006631 | <1e-4 | ssr0657 | G0:0015075 | <1e-4 | ssr5120 | G0:0044425 | <1e-4 | ss11378 | G0:0000166 | 0.0842 |
| s110444 | G0:0034641 | <1e-4 | s110595 | G0:0006163 | <1e-4 | s110436 | G0:0008171 | <1e-4 | s117062 | G0:0044446 | <1e-4 | slr0271 | G0:0000166 | 0.0842 |
| ssr1425 | G0:0051716 | <1e-4 | s111232 | G0:0018130 | <1e-4 | s111424 | G0:0015293 | <1e-4 | ssr6089 | G0:0044464 | <1e-4 | s111915 | G0:0000166 | 0.0842 |
| slr1033 | G0:0009259 | <1e-4 | s117028 | G0:0072522 | <1e-4 | slr0262 | G0:0042623 | <1e-4 | ss10461 | G0:0044425 | <1e-4 | ssr5092 | G0:0000166 | 0.0842 |
| s110839 | G0:0006631 | <1e-4 | slr1572 | G0:0080090 | <1e-4 | slr6087 | G0:0022803 | <1e-4 | slr0482 | G0:0044444 | <1e-4 | s115132 | G0:0000166 | 0.0842 |
| slr0483 | G0:0034654 | <1e-4 | s115130 | G0:0051716 | <1e-4 | slr0145 | G0:0016817 | <1e-4 | slr1657 | G0:0005575 | <1e-4 | s111532 | G0:0000166 | 0.0842 |

|         |            |       |         |            |       |         |            |       |         |            |       |         |            |        |
|---------|------------|-------|---------|------------|-------|---------|------------|-------|---------|------------|-------|---------|------------|--------|
| ssr2802 | G0:0043648 | <1e-4 | s115132 | G0:0051246 | <1e-4 | s110872 | G0:0015291 | <1e-4 | ss15031 | G0:0044444 | <1e-4 | s110608 | G0:0000166 | 0.0842 |
| s111321 | G0:0044003 | <1e-4 | s111979 | G0:0046164 | <1e-4 | s115067 | G0:0015405 | <1e-4 | ss17038 | G0:0044444 | <1e-4 | s111151 | G0:0000166 | 0.0842 |
| s111722 | G0:0009165 | <1e-4 | s1r1530 | G0:0046483 | <1e-4 | s1r0398 | G0:0015077 | <1e-4 | s110857 | G0:0044424 | <1e-4 | ssr7079 | G0:0000166 | 0.0842 |
| s111304 | G0:0006753 | <1e-4 | s1r0869 | G0:0044260 | <1e-4 | s111022 | G0:0060089 | <1e-4 | s1r7060 | G0:0044424 | <1e-4 | s111142 | G0:0000166 | 0.0842 |
| s110691 | G0:0019222 | <1e-4 | s110930 | G0:0009117 | <1e-4 | ssr6019 | G0:0022832 | <1e-4 | s111061 | G0:0043226 | <1e-4 | ssr2711 | G0:0000166 | 0.0842 |
| s1r1173 | G0:0055086 | <1e-4 | s117030 | G0:0044281 | <1e-4 | s1r1667 | G0:0015399 | <1e-4 | s110325 | G0:0043226 | <1e-4 | ss12069 | G0:0000166 | 0.0842 |
| s110071 | G0:0009056 | <1e-4 | s111201 | G0:0010556 | <1e-4 | s110867 | G0:0016817 | <1e-4 | s111761 | G0:0005575 | <1e-4 | s111570 | G0:0000166 | 0.0842 |
| ssr1499 | G0:0009987 | <1e-4 | s110905 | G0:0009117 | <1e-4 | ss12814 | G0:0022836 | <1e-4 | s110180 | G0:0044422 | <1e-4 | ssr6030 | G0:0000166 | 0.0842 |
| s1r2117 | G0:0001932 | <1e-4 | s110350 | G0:0006066 | <1e-4 | s1r1083 | G0:0015291 | <1e-4 | s1r1340 | G0:0044464 | <1e-4 | s118040 | G0:0000166 | 0.0842 |
| s110335 | G0:0031323 | <1e-4 | s111061 | G0:0080090 | <1e-4 | s111321 | G0:0005342 | <1e-4 | s110436 | G0:0043226 | <1e-4 | s1r5101 | G0:0000166 | 0.0842 |
| s111863 | G0:0071841 | <1e-4 | ss15113 | G0:0006793 | <1e-4 | sm10011 | G0:0022832 | <1e-4 | s1r0145 | G0:0043226 | <1e-4 | s1r1450 | G0:0000166 | 0.0842 |
| ss13142 | G0:0060255 | <1e-4 | s1r1563 | G0:0051179 | <1e-4 | s111380 | G0:0016741 | <1e-4 | ssr8047 | G0:0044444 | <1e-4 | s1r7102 | G0:0000166 | 0.0842 |
| s111906 | G0:0019752 | <1e-4 | s110269 | G0:0048878 | <1e-4 | ssr2802 | G0:0015077 | <1e-4 | s1r1819 | G0:0044464 | <1e-4 | s110321 | G0:0000166 | 0.0842 |
| s115090 | G0:0009144 | <1e-4 | s1r0821 | G0:0042455 | <1e-4 | s1r1659 | G0:0043492 | <1e-4 | ss10832 | G0:0005575 | <1e-4 | s1r0238 | G0:0000166 | 0.0842 |
| s111797 | G0:0043170 | <1e-4 | ss17021 | G0:0006163 | <1e-4 | s110815 | G0:0003674 | <1e-4 | s1r1259 | G0:0005575 | <1e-4 | s110496 | G0:0000166 | 0.0842 |
| s1r1814 | G0:0016054 | <1e-4 | s110413 | G0:0060255 | <1e-4 | s1r1647 | G0:0015405 | <1e-4 | s1r6100 | G0:0005575 | <1e-4 | s1r2012 | G0:0000166 | 0.0842 |
| s1r1178 | G0:0051234 | <1e-4 | s111979 | G0:0034641 | <1e-4 | s111757 | G0:0008171 | <1e-4 | s1r1926 | G0:0044444 | <1e-4 | s1r1670 | G0:0000166 | 0.0842 |
| s111388 | G0:0005996 | <1e-4 | s111832 | G0:0051818 | <1e-4 | s110268 | G0:0016741 | <1e-4 | ss11004 | G0:0044464 | <1e-4 | s118035 | G0:0000166 | 0.0842 |
| s1r0476 | G0:0019637 | <1e-4 | s110925 | G0:0046907 | <1e-4 | s110497 | G0:0022892 | <1e-4 | ssr3532 | G0:0005575 | <1e-4 | s1r0813 | G0:0000166 | 0.0842 |
| s1r1101 | G0:0009260 | <1e-4 | s111155 | G0:0052111 | <1e-4 | s110572 | G0:0060089 | <1e-4 | s1r1023 | G0:0005575 | <1e-4 | ss12814 | G0:0000166 | 0.0842 |
| s111092 | G0:0006811 | <1e-4 | ss10832 | G0:0043436 | <1e-4 | s1r0709 | G0:0015405 | <1e-4 | s1r1911 | G0:0043226 | <1e-4 | s110062 | G0:0000166 | 0.0842 |
| s1r0006 | G0:0043648 | <1e-4 | s1r7096 | G0:0042455 | <1e-4 | s1r7071 | G0:0043167 | <1e-4 | s110793 | G0:0044424 | <1e-4 | ssr0657 | G0:0000166 | 0.0842 |
| s111380 | G0:0019362 | <1e-4 | s110361 | G0:0009259 | <1e-4 | s110925 | G0:0016462 | <1e-4 | s111049 | G0:0044444 | <1e-4 | s1r0109 | G0:0000166 | 0.0842 |
| ss15015 | G0:0034641 | <1e-4 | ss12807 | G0:0019751 | <1e-4 | s110925 | G0:0015267 | <1e-4 | s1r0959 | G0:0043226 | <1e-4 | ssr7084 | G0:0000166 | 0.0842 |
| s1r0157 | G0:0009394 | <1e-4 | s110524 | G0:0033013 | <1e-4 | ss17039 | G0:0022838 | <1e-4 | s111563 | G0:0044464 | <1e-4 | s1r0588 | G0:0000166 | 0.0842 |
| s1r1702 | G0:0072528 | <1e-4 | s1r5018 | G0:0006793 | <1e-4 | ssr2615 | G0:0060089 | <1e-4 | s1r0863 | G0:0044425 | <1e-4 | ssr2975 | G0:0000166 | 0.0842 |
| s1r6074 | G0:0009126 | <1e-4 | s1r1927 | G0:0046483 | <1e-4 | s1r0168 | G0:0022832 | <1e-4 | s1r0179 | G0:0044422 | <1e-4 | s117078 | G0:0000166 | 0.0842 |
| s110072 | G0:0043412 | <1e-4 | s1r1114 | G0:0043648 | <1e-4 | s1r1203 | G0:0016741 | <1e-4 | s110783 | G0:0005575 | <1e-4 | s1r1789 | G0:0000166 | 0.0842 |
| s111736 | G0:0009132 | <1e-4 | s111359 | G0:0009394 | <1e-4 | s1r1600 | G0:0043167 | <1e-4 | s110505 | G0:0044425 | <1e-4 | s1r0888 | G0:0000166 | 0.0842 |
| s1r1241 | G0:0006066 | <1e-4 | s1r1790 | G0:0009260 | <1e-4 | s110423 | G0:0015293 | <1e-4 | s1r1670 | G0:0044464 | <1e-4 | s1r1915 | G0:0000166 | 0.0842 |
| s1r0941 | G0:0055114 | <1e-4 | s110024 | G0:0071554 | <1e-4 | s1r7094 | G0:0022803 | <1e-4 | s1r6066 | G0:0044464 | <1e-4 | s110253 | G0:0000166 | 0.0842 |
| s1r0498 | G0:0034660 | <1e-4 | ssr5020 | G0:0019219 | <1e-4 | s1r0960 | G0:0016462 | <1e-4 | ss17042 | G0:0044422 | <1e-4 | s1r6028 | G0:0000166 | 0.0842 |
| s1r1790 | G0:0044255 | <1e-4 | s110645 | G0:0009161 | <1e-4 | s110488 | G0:0015077 | <1e-4 | s1r1790 | G0:0044422 | <1e-4 | s111940 | G0:0000166 | 0.0842 |
| s110783 | G0:0048522 | <1e-4 | s1r2071 | G0:0072521 | <1e-4 | s111486 | G0:0015267 | <1e-4 | s110590 | G0:0005575 | <1e-4 | s1r6033 | G0:0000166 | 0.0842 |
| s111022 | G0:0033013 | <1e-4 | ss11972 | G0:0048523 | <1e-4 | s1r0784 | G0:0015077 | <1e-4 | s111916 | G0:0044424 | <1e-4 | s1r2117 | G0:0000166 | 0.0842 |
| ss16061 | G0:0051188 | <1e-4 | ss15031 | G0:0055082 | <1e-4 | s1r5119 | G0:0022890 | <1e-4 | s1r0702 | G0:0043226 | <1e-4 | s1r0948 | G0:0000166 | 0.0842 |
| s1r1287 | G0:0008610 | <1e-4 | s1r5012 | G0:0009126 | <1e-4 | s1r7026 | G0:0022836 | <1e-4 | ss15103 | G0:0044464 | <1e-4 | s1r7094 | G0:0000166 | 0.0842 |
| s1r0709 | G0:0043436 | <1e-4 | s1r0553 | G0:0009889 | <1e-4 | s111784 | G0:0015291 | <1e-4 | ssr0332 | G0:0044424 | <1e-4 | ss13829 | G0:0000166 | 0.0842 |
| s110382 | G0:0009124 | <1e-4 | s1r0179 | G0:0043549 | <1e-4 | s1r0770 | G0:0015291 | <1e-4 | s1r1142 | G0:0005575 | <1e-4 | s110925 | G0:0000166 | 0.0842 |
| ssr2554 | G0:0006811 | <1e-4 | s1r1704 | G0:0031640 | <1e-4 | s1r6045 | G0:0015077 | <1e-4 | s1r1590 | G0:0005575 | <1e-4 | s1r2060 | G0:0000166 | 0.0842 |
| s110525 | G0:0048523 | <1e-4 | s1r2144 | G0:0009263 | <1e-4 | s110381 | G0:0008171 | <1e-4 | s1r0978 | G0:0044464 | <1e-4 | s1r5087 | G0:0000166 | 0.0842 |
| s1r7094 | G0:0006811 | <1e-4 | s1r6008 | G0:0055114 | <1e-4 | s115130 | G0:0022891 | <1e-4 | s1r1288 | G0:0005575 | <1e-4 | s111131 | G0:0000166 | 0.0842 |
| ss10483 | G0:0046907 | <1e-4 | s1r0271 | G0:0006066 | <1e-4 | s110867 | G0:0060089 | <1e-4 | s1r1462 | G0:0005575 | <1e-4 | ssr1425 | G0:0000166 | 0.0842 |
| s110335 | G0:0006220 | <1e-4 | s110359 | G0:0051234 | <1e-4 | s1r1168 | G0:0005342 | <1e-4 | s1r1385 | G0:0044446 | <1e-4 | s1r0241 | G0:0000166 | 0.0842 |
| s1r1762 | G0:0065007 | <1e-4 | s110423 | G0:0009126 | <1e-4 | s1r0455 | G0:0015399 | <1e-4 | s1r0607 | G0:0044422 | <1e-4 | ss10467 | G0:0000166 | 0.0842 |
| s1r0989 | G0:0009308 | <1e-4 | s110875 | G0:0009059 | <1e-4 | s110727 | G0:0022838 | <1e-4 | s110413 | G0:0044464 | <1e-4 | s1r0689 | G0:0000166 | 0.0842 |
| s110280 | G0:0048519 | <1e-4 | s110479 | G0:0009892 | <1e-4 | s110096 | G0:0060089 | <1e-4 | s110022 | G0:0005575 | <1e-4 | s111089 | G0:0000166 | 0.0842 |
| s1r1789 | G0:0050801 | <1e-4 | s1r0358 | G0:0009893 | <1e-4 | ss10788 | G0:0015405 | <1e-4 | s1r6008 | G0:0044422 | <1e-4 | s1r5024 | G0:0000166 | 0.0842 |
| s1r0108 | G0:0072521 | <1e-4 | ssr2009 | G0:0046128 | <1e-4 | s1r7059 | G0:0005342 | <1e-4 | s115030 | G0:0044422 | <1e-4 | ssr1473 | G0:0000166 | 0.0842 |
| s110301 | G0:0048523 | <1e-4 | s1r6104 | G0:0019637 | <1e-4 | ss10461 | G0:0022838 | <1e-4 | ssr6099 | G0:0044422 | <1e-4 | ss11690 | G0:0000166 | 0.0842 |
| s111002 | G0:0016054 | <1e-4 | s1r1047 | G0:0009260 | <1e-4 | sg10002 | G0:0022803 | <1e-4 | ss15065 | G0:0044424 | <1e-4 | ss18039 | G0:0000166 | 0.0842 |
| s110623 | G0:0006082 | <1e-4 | s1r1398 | G0:0009057 | <1e-4 | ssr0109 | G0:0015267 | <1e-4 | s1r2004 | G0:0044422 | <1e-4 | ssr1768 | G0:0000166 | 0.0842 |
| s1r2111 | G0:0051186 | <1e-4 | ss13549 | G0:0022411 | <1e-4 | s111135 | G0:0022832 | <1e-4 | s1r1977 | G0:0044425 | <1e-4 | s1r0313 | G0:0000166 | 0.0842 |
| s110499 | G0:0052188 | <1e-4 | s111061 | G0:0008150 | <1e-4 | ssr6062 | G0:0015399 | <1e-4 | s1r0184 | G0:0044464 | <1e-4 | ssr2318 | G0:0000166 | 0.0842 |

|          |            |       |          |            |       |          |            |       |          |            |       |          |            |        |
|----------|------------|-------|----------|------------|-------|----------|------------|-------|----------|------------|-------|----------|------------|--------|
| sll1634  | G0:0072524 | <1e-4 | s1r7057  | G0:0009889 | <1e-4 | s1r1951  | G0:0022803 | <1e-4 | sll15003 | G0:0005575 | <1e-4 | sll1188  | G0:0000166 | 0.0842 |
| s1r1084  | G0:0045184 | <1e-4 | ssr2060  | G0:0052188 | <1e-4 | ss17042  | G0:0043492 | <1e-4 | sll1503  | G0:0044422 | <1e-4 | ss16092  | G0:0000166 | 0.0842 |
| sll0479  | G0:0043933 | <1e-4 | ssr3129  | G0:0042455 | <1e-4 | s1r0702  | G0:0015291 | <1e-4 | s1r0635  | G0:0044425 | <1e-4 | s1r0642  | G0:0017111 | 0.0833 |
| s1r1699  | G0:0046394 | <1e-4 | ssr7079  | G0:0043170 | <1e-4 | ssr5020  | G0:0022803 | <1e-4 | s1r1702  | G0:0044424 | <1e-4 | ssr3154  | G0:0017111 | 0.0833 |
| ssr0336  | G0:0046128 | <1e-4 | sll1252  | G0:0051188 | <1e-4 | sll10944 | G0:0003674 | <1e-4 | s1r7080  | G0:0043226 | <1e-4 | s1r0147  | G0:0017111 | 0.0833 |
| s1r0362  | G0:0048523 | <1e-4 | sll1902  | G0:0045184 | <1e-4 | s1r0291  | G0:0015293 | <1e-4 | sll10822 | G0:0044464 | <1e-4 | sll1477  | G0:0017111 | 0.0833 |
| sll0752  | G0:0016052 | <1e-4 | sll10172 | G0:0031640 | <1e-4 | ss12971  | G0:0043167 | <1e-4 | sll11735 | G0:0044464 | <1e-4 | s1r0765  | G0:0017111 | 0.0833 |
| sll1532  | G0:0044282 | <1e-4 | s1r1188  | G0:0046394 | <1e-4 | sll11040 | G0:0003674 | <1e-4 | sll10218 | G0:0044444 | <1e-4 | sll11995 | G0:0017111 | 0.0833 |
| sll10103 | G0:0009309 | <1e-4 | sll10564 | G0:0009892 | <1e-4 | sll10645 | G0:0022891 | <1e-4 | s1r1664  | G0:0044425 | <1e-4 | sll10735 | G0:0017111 | 0.0833 |
| sll10647 | G0:0046128 | <1e-4 | sll10314 | G0:0080090 | <1e-4 | ssr0536  | G0:0022892 | <1e-4 | s1r2092  | G0:0044425 | <1e-4 | sll11222 | G0:0017111 | 0.0833 |
| ss15100  | G0:0034641 | <1e-4 | ss11378  | G0:0006753 | <1e-4 | s1r0147  | G0:0043167 | <1e-4 | s1r1168  | G0:0044425 | <1e-4 | s1r0108  | G0:0017111 | 0.0833 |
| sll1862  | G0:0055086 | <1e-4 | ssr5092  | G0:0009161 | <1e-4 | ssr2848  | G0:0008171 | <1e-4 | s1r0818  | G0:0043226 | <1e-4 | sll11528 | G0:0017111 | 0.0833 |
| s1r0374  | G0:0050801 | <1e-4 | sll1306  | G0:0043933 | <1e-4 | s1r7094  | G0:0015075 | <1e-4 | s1r6091  | G0:0044446 | <1e-4 | sll1446  | G0:0017111 | 0.0833 |
| sll1158  | G0:0009260 | <1e-4 | sll10488 | G0:0018130 | <1e-4 | s1r1505  | G0:0015293 | <1e-4 | ss12595  | G0:0005575 | <1e-4 | sll11272 | G0:0017111 | 0.0833 |
| s1r7025  | G0:0051188 | <1e-4 | s1r1150  | G0:0050896 | <1e-4 | sll11926 | G0:0015267 | <1e-4 | sll11173 | G0:0005575 | <1e-4 | ssr2142  | G0:0016787 | 0.0829 |
| s1r1186  | G0:0071840 | <1e-4 | s1r1052  | G0:0033013 | <1e-4 | s1r1813  | G0:0003674 | <1e-4 | s1r5017  | G0:0044444 | <1e-4 | s1r1644  | G0:0016787 | 0.0829 |
| s1r1852  | G0:0046907 | <1e-4 | s1r1407  | G0:0052188 | <1e-4 | sll11863 | G0:0015077 | <1e-4 | s1r0870  | G0:0044444 | <1e-4 | sll10445 | G0:0005215 | 0.0825 |
| s1r7095  | G0:0051716 | <1e-4 | s1r0184  | G0:0072521 | <1e-4 | s1r0695  | G0:0015293 | <1e-4 | ssr2047  | G0:0044425 | <1e-4 | s1r1917  | G0:0009058 | 0.0813 |
| s1r1170  | G0:0034660 | <1e-4 | s1r1917  | G0:0009117 | <1e-4 | s1r5024  | G0:0015399 | <1e-4 | s1r0613  | G0:0044425 | <1e-4 | sll11186 | G0:0009058 | 0.0813 |
| ss18003  | G0:0009144 | <1e-4 | sll11586 | G0:0046164 | <1e-4 | sll10763 | G0:0022891 | <1e-4 | sll10585 | G0:0043226 | <1e-4 | s1r1866  | G0:0009058 | 0.0813 |
| sll10157 | G0:0006733 | <1e-4 | s1r1288  | G0:0019752 | <1e-4 | s1r0606  | G0:0015075 | <1e-4 | sll11570 | G0:0044446 | <1e-4 | s1r1441  | G0:0009058 | 0.0813 |
| s1r6081  | G0:0048518 | <1e-4 | sll10314 | G0:0016053 | <1e-4 | s1r1557  | G0:0043167 | <1e-4 | ss17048  | G0:0044425 | <1e-4 | s1r1353  | G0:0009058 | 0.0813 |
| sll11192 | G0:0044275 | <1e-4 | sll11307 | G0:0006721 | <1e-4 | ss13142  | G0:0022890 | <1e-4 | s1r0964  | G0:0043226 | <1e-4 | sll10547 | G0:0009058 | 0.0813 |
| sll11381 | G0:0048522 | <1e-4 | s1r0208  | G0:0051188 | <1e-4 | sll10198 | G0:0008171 | <1e-4 | s1r6064  | G0:0044464 | <1e-4 | s1r1398  | G0:0009058 | 0.0813 |
| ssr3402  | G0:0009150 | <1e-4 | s1r7059  | G0:0051171 | <1e-4 | sll11378 | G0:0022857 | <1e-4 | ssr6003  | G0:0044425 | <1e-4 | sll11218 | G0:0009058 | 0.0813 |
| sll10069 | G0:0055086 | <1e-4 | s1r0204  | G0:0071496 | <1e-4 | s1r7080  | G0:0016817 | <1e-4 | sll10563 | G0:0044424 | <1e-4 | sll11174 | G0:0009058 | 0.0813 |
| sll10775 | G0:0009308 | <1e-4 | ssr3572  | G0:0006163 | <1e-4 | sll10775 | G0:0015267 | <1e-4 | ssr0536  | G0:0044446 | <1e-4 | s1r0305  | G0:0009058 | 0.0813 |
| s1r0366  | G0:0043549 | <1e-4 | ssr0336  | G0:0072527 | <1e-4 | ss11377  | G0:0015077 | <1e-4 | sll16053 | G0:0044446 | <1e-4 | s1r2025  | G0:0009058 | 0.0813 |
| s1r7091  | G0:0045184 | <1e-4 | s1r0919  | G0:0044271 | <1e-4 | ssr2422  | G0:0016741 | <1e-4 | s1r0981  | G0:0043226 | <1e-4 | sll10513 | G0:0009058 | 0.0813 |
| s1r0598  | G0:0033013 | <1e-4 | s1r0787  | G0:0001932 | <1e-4 | s1r0038  | G0:0015075 | <1e-4 | sll10926 | G0:0044444 | <1e-4 | sll11472 | G0:0009058 | 0.0813 |
| sll10448 | G0:0042455 | <1e-4 | sll11765 | G0:0051347 | <1e-4 | s1r0780  | G0:0015399 | <1e-4 | ssr3570  | G0:0044446 | <1e-4 | sll10301 | G0:0009058 | 0.0813 |
| sll11135 | G0:0050794 | <1e-4 | s1r1670  | G0:0044248 | <1e-4 | sll10563 | G0:0022857 | <1e-4 | s1r6071  | G0:0044464 | <1e-4 | sll10596 | G0:0009058 | 0.0813 |
| ssr3341  | G0:0008150 | <1e-4 | s1r1530  | G0:0009991 | <1e-4 | s1r0355  | G0:0015077 | <1e-4 | sll11348 | G0:0044422 | <1e-4 | sll10584 | G0:0017111 | 0.08   |
| sll16052 | G0:0009124 | <1e-4 | ss16035  | G0:0006576 | <1e-4 | s1r1143  | G0:0022857 | <1e-4 | sll10156 | G0:0044444 | <1e-4 | sll11763 | G0:0017111 | 0.08   |
| s1r1563  | G0:0080090 | <1e-4 | sll10497 | G0:0006733 | <1e-4 | s1r0554  | G0:0042623 | <1e-4 | sll11912 | G0:0043226 | <1e-4 | ss10750  | G0:0017111 | 0.08   |
| sll12011 | G0:0046394 | <1e-4 | sll10586 | G0:0016054 | <1e-4 | s1r0872  | G0:0043167 | <1e-4 | s1r0082  | G0:0044422 | <1e-4 | sll11527 | G0:0017111 | 0.08   |
| sll11834 | G0:0009056 | <1e-4 | s1r0356  | G0:0072521 | <1e-4 | sll10319 | G0:0005342 | <1e-4 | s1r1444  | G0:0044424 | <1e-4 | sll11293 | G0:0017111 | 0.08   |
| s1r1737  | G0:0009141 | <1e-4 | s1r0606  | G0:0006220 | <1e-4 | ssr6048  | G0:0022857 | <1e-4 | sll11946 | G0:0044424 | <1e-4 | ss10294  | G0:0017111 | 0.08   |
| s1r6074  | G0:0050896 | <1e-4 | ss17048  | G0:0008150 | <1e-4 | sll11447 | G0:0016746 | <1e-4 | ssr1375  | G0:0043226 | <1e-4 | s1r1235  | G0:0017111 | 0.08   |
| sll15089 | G0:0043549 | <1e-4 | ssr1765  | G0:0019222 | <1e-4 | s1r6064  | G0:0003674 | <1e-4 | s1r0358  | G0:0044446 | <1e-4 | sll10350 | G0:0017111 | 0.08   |
| ss18008  | G0:0006732 | <1e-4 | s1r1275  | G0:0045184 | <1e-4 | sll10397 | G0:0022832 | <1e-4 | s1r0287  | G0:0044422 | <1e-4 | s1r0579  | G0:0009058 | 0.0799 |
| s1r1611  | G0:0008150 | <1e-4 | s1r0326  | G0:0034660 | <1e-4 | ssr1765  | G0:0022892 | <1e-4 | sll11942 | G0:0043226 | <1e-4 | ssr2201  | G0:0009058 | 0.0799 |
| s1r0313  | G0:0009889 | <1e-4 | sll10780 | G0:0006733 | <1e-4 | s1r1023  | G0:0022838 | <1e-4 | ssr2201  | G0:0043226 | <1e-4 | s1r2018  | G0:0009058 | 0.0799 |
| ss18003  | G0:0051716 | <1e-4 | sll10181 | G0:0006766 | <1e-4 | sll10981 | G0:0022838 | <1e-4 | s1r1875  | G0:0044444 | <1e-4 | s1r0317  | G0:0009058 | 0.0799 |
| s1r0885  | G0:0051246 | <1e-4 | s1r2005  | G0:0006733 | <1e-4 | s1r1767  | G0:0022890 | <1e-4 | s1r6094  | G0:0005575 | <1e-4 | sll11424 | G0:0009058 | 0.0799 |
| s1r1935  | G0:0090304 | <1e-4 | s1r2092  | G0:0006220 | <1e-4 | sll10984 | G0:0022838 | <1e-4 | s1r0912  | G0:0044464 | <1e-4 | s1r1303  | G0:0003723 | 0.0788 |
| sm10011  | G0:0006811 | <1e-4 | s1r0053  | G0:0009893 | <1e-4 | sll11531 | G0:0022891 | <1e-4 | s1r0581  | G0:0044424 | <1e-4 | sll11938 | G0:0003723 | 0.0788 |
| s1r1721  | G0:0048519 | <1e-4 | sll10702 | G0:0045184 | <1e-4 | s1r6022  | G0:0022890 | <1e-4 | sll11573 | G0:0044464 | <1e-4 | s1r1413  | G0:0003723 | 0.0788 |
| sll10189 | G0:0006721 | <1e-4 | s1r0589  | G0:0072528 | <1e-4 | sll11606 | G0:0005342 | <1e-4 | ssr2318  | G0:0044464 | <1e-4 | s1r1762  | G0:0003723 | 0.0788 |
| sll1201  | G0:0022607 | <1e-4 | s1r1819  | G0:0033013 | <1e-4 | sll17086 | G0:0015399 | <1e-4 | sll10382 | G0:0044446 | <1e-4 | sll11634 | G0:0003723 | 0.0788 |
| s1r6073  | G0:0006066 | <1e-4 | sll11738 | G0:0006220 | <1e-4 | s1r1865  | G0:0015405 | <1e-4 | s1r2038  | G0:0005575 | <1e-4 | s1r0112  | G0:0003723 | 0.0788 |
| sll10611 | G0:0009893 | <1e-4 | s1r1396  | G0:0034654 | <1e-4 | s1r6033  | G0:0043167 | <1e-4 | sll10843 | G0:0044425 | <1e-4 | ssr1552  | G0:0003723 | 0.0788 |
| ssr3129  | G0:0006082 | <1e-4 | sll11381 | G0:0051347 | <1e-4 | s1r0111  | G0:0060089 | <1e-4 | s1r1179  | G0:0044422 | <1e-4 | s1r1383  | G0:0003723 | 0.0788 |
| s1r1657  | G0:0043436 | <1e-4 | ssr3300  | G0:0009123 | <1e-4 | sll11004 | G0:0008171 | <1e-4 | s1r0957  | G0:0005575 | <1e-4 | sll11372 | G0:0003723 | 0.0788 |

|         |            |       |         |            |       |         |            |       |         |            |       |         |            |        |
|---------|------------|-------|---------|------------|-------|---------|------------|-------|---------|------------|-------|---------|------------|--------|
| s111715 | G0:0009259 | <1e-4 | s115130 | G0:0009161 | <1e-4 | s110448 | G0:0015405 | <1e-4 | s1r0980 | G0:0044444 | <1e-4 | s111512 | G0:0003723 | 0.0788 |
| s1r0058 | G0:0055082 | <1e-4 | ssr6078 | G0:0043549 | <1e-4 | s110252 | G0:0022803 | <1e-4 | s111965 | G0:0044425 | <1e-4 | s111267 | G0:0003723 | 0.0788 |
| s110269 | G0:0006720 | <1e-4 | s1r6094 | G0:0006082 | <1e-4 | s110141 | G0:0022836 | <1e-4 | s1r2012 | G0:0005575 | <1e-4 | s1r1169 | G0:0003723 | 0.0788 |
| s110350 | G0:0080090 | <1e-4 | s111757 | G0:0009165 | <1e-4 | s111757 | G0:0022832 | <1e-4 | ss17022 | G0:0044464 | <1e-4 | s110740 | G0:0003723 | 0.0788 |
| s112007 | G0:0006811 | <1e-4 | s1r1659 | G0:0050794 | <1e-4 | s1r1025 | G0:0022857 | <1e-4 | s111254 | G0:0044444 | <1e-4 | s111241 | G0:0003723 | 0.0788 |
| s117087 | G0:0044260 | <1e-4 | s111222 | G0:0006753 | <1e-4 | s111106 | G0:0008171 | <1e-4 | s1r0121 | G0:0044425 | <1e-4 | s1r1074 | G0:0003723 | 0.0788 |
| s1r1636 | G0:0043648 | <1e-4 | s111671 | G0:0019637 | <1e-4 | s1r0937 | G0:0016746 | <1e-4 | ss11918 | G0:0044425 | <1e-4 | s1r0596 | G0:0003723 | 0.0788 |
| s1r0729 | G0:0019637 | <1e-4 | s110191 | G0:0055114 | <1e-4 | s110553 | G0:0015077 | <1e-4 | s110997 | G0:0043226 | <1e-4 | s111170 | G0:0003723 | 0.0788 |
| s110230 | G0:0051347 | <1e-4 | ss10294 | G0:0055114 | <1e-4 | s115046 | G0:0022857 | <1e-4 | s1r6103 | G0:0044444 | <1e-4 | s110188 | G0:0003723 | 0.0788 |
| s1r0689 | G0:0022411 | <1e-4 | s110846 | G0:0051186 | <1e-4 | s110272 | G0:0015267 | <1e-4 | s111652 | G0:0044425 | <1e-4 | s110585 | G0:0003723 | 0.0788 |
| s112013 | G0:0080090 | <1e-4 | s1r7092 | G0:0009057 | <1e-4 | s117050 | G0:0060089 | <1e-4 | s111262 | G0:0005575 | <1e-4 | s1r1259 | G0:0003723 | 0.0788 |
| s1r2011 | G0:0010556 | <1e-4 | s1r1215 | G0:0046128 | <1e-4 | s110994 | G0:0015399 | <1e-4 | s110832 | G0:0005575 | <1e-4 | s110981 | G0:0003723 | 0.0788 |
| s110293 | G0:0009991 | <1e-4 | s1r2119 | G0:0009161 | <1e-4 | ss13383 | G0:0003674 | <1e-4 | s1r2046 | G0:0044464 | <1e-4 | s1r0554 | G0:0003723 | 0.0788 |
| ssr3129 | G0:0046128 | <1e-4 | s111692 | G0:0072522 | <1e-4 | s1r1576 | G0:0015075 | <1e-4 | s1r1852 | G0:0044425 | <1e-4 | s111738 | G0:0003723 | 0.0788 |
| ss16035 | G0:0044260 | <1e-4 | s110283 | G0:0050794 | <1e-4 | ss10832 | G0:0016462 | <1e-4 | s111834 | G0:0044464 | <1e-4 | s1r1647 | G0:0003723 | 0.0788 |
| s111163 | G0:0050794 | <1e-4 | s110241 | G0:0009059 | <1e-4 | ssr7084 | G0:0015405 | <1e-4 | s1r0305 | G0:0043226 | <1e-4 | s1r0455 | G0:0003723 | 0.0788 |
| s111942 | G0:0043412 | <1e-4 | s1r6039 | G0:0019219 | <1e-4 | s1r0605 | G0:0022838 | <1e-4 | s1r0157 | G0:0044444 | <1e-4 | s1r1690 | G0:0003723 | 0.0788 |
| ss11577 | G0:0009132 | <1e-4 | s110518 | G0:0005996 | <1e-4 | s1r1900 | G0:0015267 | <1e-4 | s111784 | G0:0005575 | <1e-4 | ss13382 | G0:0003723 | 0.0788 |
| ss10832 | G0:0009309 | <1e-4 | s111717 | G0:0022607 | <1e-4 | s1r0645 | G0:0015399 | <1e-4 | s1r6014 | G0:0044444 | <1e-4 | s1r1287 | G0:0003723 | 0.0788 |
| s110656 | G0:0051179 | <1e-4 | s110810 | G0:0071554 | <1e-4 | s110327 | G0:0015077 | <1e-4 | s1r0065 | G0:0044444 | <1e-4 | ss10739 | G0:0003723 | 0.0788 |
| ss10353 | G0:0006220 | <1e-4 | s111472 | G0:0042180 | <1e-4 | s1r1056 | G0:0060089 | <1e-4 | s115030 | G0:0044464 | <1e-4 | s1r0887 | G0:0003723 | 0.0788 |
| s1r1163 | G0:0043412 | <1e-4 | s1r0103 | G0:0009259 | <1e-4 | s1r0645 | G0:0022891 | <1e-4 | s110756 | G0:0044446 | <1e-4 | s1r1827 | G0:0003723 | 0.0788 |
| s1r0058 | G0:0055114 | <1e-4 | s1r1431 | G0:0009892 | <1e-4 | s111505 | G0:0016741 | <1e-4 | s116054 | G0:0044464 | <1e-4 | s1r7024 | G0:0003723 | 0.0788 |
| ssr1499 | G0:0051347 | <1e-4 | s111698 | G0:0051188 | <1e-4 | s111571 | G0:0022803 | <1e-4 | ss15099 | G0:0044464 | <1e-4 | s111411 | G0:0003723 | 0.0788 |
| s1r2080 | G0:0006220 | <1e-4 | ss13142 | G0:0046907 | <1e-4 | s1r1215 | G0:0015077 | <1e-4 | s117055 | G0:0043226 | <1e-4 | s110888 | G0:0003723 | 0.0788 |
| s1r1638 | G0:0043933 | <1e-4 | s1r0909 | G0:0080090 | <1e-4 | s1r1886 | G0:0015405 | <1e-4 | s1r1568 | G0:0043226 | <1e-4 | s1r1809 | G0:0003723 | 0.0788 |
| s1r1034 | G0:0034641 | <1e-4 | ss12064 | G0:0055114 | <1e-4 | s1r6081 | G0:0043167 | <1e-4 | s1r0845 | G0:0044446 | <1e-4 | s110156 | G0:0003723 | 0.0788 |
| s111424 | G0:0022411 | <1e-4 | s115097 | G0:0046907 | <1e-4 | ss17007 | G0:0022832 | <1e-4 | s1r1753 | G0:0043226 | <1e-4 | s110669 | G0:0003723 | 0.0788 |
| s1r0634 | G0:0009165 | <1e-4 | s1r0082 | G0:0009260 | <1e-4 | s1r0355 | G0:0016817 | <1e-4 | s1r0978 | G0:0044446 | <1e-4 | s110564 | G0:0003723 | 0.0788 |
| s1r6101 | G0:0072527 | <1e-4 | s1r6081 | G0:0008610 | <1e-4 | s1r2119 | G0:0016817 | <1e-4 | s1r0106 | G0:0044424 | <1e-4 | s110752 | G0:0003723 | 0.0788 |
| s110611 | G0:0009144 | <1e-4 | s117077 | G0:0051234 | <1e-4 | s1r1958 | G0:0022892 | <1e-4 | s1r1260 | G0:0044446 | <1e-4 | s1r0373 | G0:0003723 | 0.0788 |
| s110793 | G0:0046394 | <1e-4 | s1r1056 | G0:0009987 | <1e-4 | s110595 | G0:0003674 | <1e-4 | s111912 | G0:0044464 | <1e-4 | s1r0789 | G0:0003723 | 0.0788 |
| s110518 | G0:0071841 | <1e-4 | s1r0243 | G0:0009991 | <1e-4 | ss15045 | G0:0016817 | <1e-4 | s1r0498 | G0:0005575 | <1e-4 | s111541 | G0:0003723 | 0.0788 |
| s115004 | G0:0006811 | <1e-4 | s111265 | G0:0006732 | <1e-4 | s115063 | G0:0015405 | <1e-4 | s1r1095 | G0:0043226 | <1e-4 | ssr2754 | G0:0003723 | 0.0788 |
| s111025 | G0:0043549 | <1e-4 | s1r2092 | G0:0009893 | <1e-4 | s110539 | G0:0015267 | <1e-4 | s111485 | G0:0044422 | <1e-4 | s111173 | G0:0003723 | 0.0788 |
| s111913 | G0:0051179 | <1e-4 | s110022 | G0:0055114 | <1e-4 | s110788 | G0:0022832 | <1e-4 | ss15113 | G0:0044424 | <1e-4 | s111399 | G0:0003723 | 0.0788 |
| s1r0318 | G0:0044282 | <1e-4 | s110861 | G0:0009991 | <1e-4 | ssr3570 | G0:0022832 | <1e-4 | s110293 | G0:0044444 | <1e-4 | s1r2048 | G0:0003723 | 0.0788 |
| s110611 | G0:0060255 | <1e-4 | s110301 | G0:0034654 | <1e-4 | s1r0852 | G0:0015291 | <1e-4 | s1r7099 | G0:0044444 | <1e-4 | s1r1338 | G0:0003723 | 0.0788 |
| s1r1767 | G0:0008150 | <1e-4 | s111562 | G0:0019752 | <1e-4 | s110481 | G0:0003674 | <1e-4 | s1r0596 | G0:0044424 | <1e-4 | s110871 | G0:0003723 | 0.0788 |
| s110176 | G0:0050794 | <1e-4 | s1r1977 | G0:0019752 | <1e-4 | s110141 | G0:0015075 | <1e-4 | s1r1571 | G0:0044464 | <1e-4 | s1r0318 | G0:0003723 | 0.0788 |
| s111054 | G0:0055082 | <1e-4 | s1r7091 | G0:0006811 | <1e-4 | s111613 | G0:0015267 | <1e-4 | s1r5102 | G0:0044464 | <1e-4 | s111659 | G0:0003723 | 0.0788 |
| s111658 | G0:0044260 | <1e-4 | s1r0751 | G0:0051234 | <1e-4 | s1r0755 | G0:0015405 | <1e-4 | s111130 | G0:0044422 | <1e-4 | s1r1122 | G0:0003723 | 0.0788 |
| s1r1047 | G0:0046483 | <1e-4 | s1r1999 | G0:0019752 | <1e-4 | ssr2439 | G0:0022838 | <1e-4 | s1r7057 | G0:0044446 | <1e-4 | s1r2115 | G0:0003723 | 0.0788 |
| s110981 | G0:0065007 | <1e-4 | s1r1864 | G0:0010556 | <1e-4 | ssr1951 | G0:0022832 | <1e-4 | s110552 | G0:0005575 | <1e-4 | s1r0801 | G0:0003723 | 0.0788 |
| ssr5074 | G0:0006720 | <1e-4 | s1r1053 | G0:0006733 | <1e-4 | s1r0459 | G0:0016746 | <1e-4 | s1r0607 | G0:0005575 | <1e-4 | s1r0358 | G0:0003723 | 0.0788 |
| s111714 | G0:0051246 | <1e-4 | ss12814 | G0:0051186 | <1e-4 | s111583 | G0:0022857 | <1e-4 | ssr2201 | G0:0044464 | <1e-4 | s1r1812 | G0:0003676 | 0.0782 |
| s1r2121 | G0:0009889 | <1e-4 | s111024 | G0:0034641 | <1e-4 | s1r1998 | G0:0043492 | <1e-4 | ss10312 | G0:0044425 | <1e-4 | s110413 | G0:0003676 | 0.0782 |
| s1r1753 | G0:0043436 | <1e-4 | s1r0516 | G0:0009262 | <1e-4 | s111737 | G0:0022838 | <1e-4 | s110595 | G0:0044425 | <1e-4 | s1r0108 | G0:0003676 | 0.0781 |
| s111372 | G0:0009991 | <1e-4 | s1r1704 | G0:0051246 | <1e-4 | s111882 | G0:0016741 | <1e-4 | s115030 | G0:0044424 | <1e-4 | s111528 | G0:0003676 | 0.0781 |
| s1r1033 | G0:0072524 | <1e-4 | s110314 | G0:0009132 | <1e-4 | s110274 | G0:0022836 | <1e-4 | s1r1658 | G0:0044424 | <1e-4 | s1r1591 | G0:0003676 | 0.0781 |
| ssr7079 | G0:0051246 | <1e-4 | s111151 | G0:0046164 | <1e-4 | s1r1980 | G0:0022836 | <1e-4 | s1r0581 | G0:0044446 | <1e-4 | s1r0818 | G0:0003676 | 0.0781 |
| s1r0725 | G0:0016052 | <1e-4 | s110911 | G0:0006732 | <1e-4 | s1r1780 | G0:0060089 | <1e-4 | s111866 | G0:0044424 | <1e-4 | ssr3154 | G0:0003676 | 0.0781 |
| s1r0815 | G0:0022411 | <1e-4 | s111552 | G0:0034660 | <1e-4 | s1r0273 | G0:0015405 | <1e-4 | s110160 | G0:0044422 | <1e-4 | s1r0642 | G0:0003676 | 0.0781 |
| s1r2121 | G0:0009150 | <1e-4 | ss11263 | G0:0044281 | <1e-4 | s1r1142 | G0:0060089 | <1e-4 | s110382 | G0:0044425 | <1e-4 | s110735 | G0:0003676 | 0.0781 |



|          |            |       |          |            |       |          |            |       |          |            |       |          |            |        |
|----------|------------|-------|----------|------------|-------|----------|------------|-------|----------|------------|-------|----------|------------|--------|
| sll1911  | G0:0048518 | <1e-4 | sll2013  | G0:0006721 | <1e-4 | slr7099  | G0:0022836 | <1e-4 | ssr6030  | G0:0044444 | <1e-4 | slr1235  | G0:0003676 | 0.0777 |
| sll17086 | G0:0046164 | <1e-4 | sll1659  | G0:0051716 | <1e-4 | slr1956  | G0:0015399 | <1e-4 | sll1960  | G0:0044444 | <1e-4 | sll1527  | G0:0003676 | 0.0777 |
| slr1813  | G0:0051171 | <1e-4 | sll10274 | G0:0071840 | <1e-4 | slr0325  | G0:0022890 | <1e-4 | slr2005  | G0:0043226 | <1e-4 | slr1800  | G0:0009058 | 0.0771 |
| slr2000  | G0:0006066 | <1e-4 | sll10743 | G0:0006811 | <1e-4 | sll10444 | G0:0042623 | <1e-4 | sll10446 | G0:0044444 | <1e-4 | ss12996  | G0:0009058 | 0.0771 |
| sll12007 | G0:0009161 | <1e-4 | slr1800  | G0:0072522 | <1e-4 | ss16035  | G0:0042623 | <1e-4 | slr0664  | G0:0044424 | <1e-4 | slr1444  | G0:0009058 | 0.0771 |
| ss18008  | G0:0071554 | <1e-4 | slr1611  | G0:0019222 | <1e-4 | ssr2615  | G0:0015405 | <1e-4 | slr1546  | G0:0044424 | <1e-4 | sll10558 | G0:0009058 | 0.0771 |
| sll10749 | G0:0072522 | <1e-4 | ss11792  | G0:0006811 | <1e-4 | slr2025  | G0:0022838 | <1e-4 | ssr3532  | G0:0043226 | <1e-4 | sll1526  | G0:0009058 | 0.0771 |
| ss13451  | G0:0048878 | <1e-4 | sll10584 | G0:0048518 | <1e-4 | slr1472  | G0:0016817 | <1e-4 | sll10382 | G0:0044464 | <1e-4 | ssr1391  | G0:0009058 | 0.0771 |
| slr1895  | G0:0006793 | <1e-4 | sll10785 | G0:0050794 | <1e-4 | ss15031  | G0:0015293 | <1e-4 | slr0816  | G0:0044444 | <1e-4 | slr0594  | G0:0009058 | 0.0771 |
| sll18011 | G0:0006220 | <1e-4 | slr1470  | G0:0071554 | <1e-4 | slr1163  | G0:0022892 | <1e-4 | slr0249  | G0:0044422 | <1e-4 | sll10931 | G0:0017111 | 0.0768 |
| slr0588  | G0:0043549 | <1e-4 | ss11690  | G0:0006163 | <1e-4 | sll11414 | G0:0016462 | <1e-4 | sll11979 | G0:0044425 | <1e-4 | slr1636  | G0:0017111 | 0.0768 |
| sll11219 | G0:0008150 | <1e-4 | sll11660 | G0:0072524 | <1e-4 | sll10274 | G0:0042623 | <1e-4 | sll11089 | G0:0044444 | <1e-4 | slr1812  | G0:0017111 | 0.0768 |
| ss17045  | G0:0009161 | <1e-4 | sll11715 | G0:0044255 | <1e-4 | sll11265 | G0:0022890 | <1e-4 | sll10926 | G0:0043226 | <1e-4 | sll10149 | G0:0000166 | 0.0735 |
| ss12471  | G0:0048523 | <1e-4 | sll10071 | G0:0050801 | <1e-4 | slr6090  | G0:0022832 | <1e-4 | slr0217  | G0:0044464 | <1e-4 | sll10242 | G0:0016787 | 0.0723 |
| sll11880 | G0:0044003 | <1e-4 | sll11068 | G0:0048522 | <1e-4 | slr0863  | G0:0015075 | <1e-4 | slr0423  | G0:0044444 | <1e-4 | slr1915  | G0:0016787 | 0.0719 |
| ss18005  | G0:0008150 | <1e-4 | sll11476 | G0:0006066 | <1e-4 | slr1807  | G0:0022832 | <1e-4 | slr8021  | G0:0044424 | <1e-4 | ss12971  | G0:0016787 | 0.0719 |
| sll10282 | G0:0046128 | <1e-4 | slr1951  | G0:0006066 | <1e-4 | sll18032 | G0:0016746 | <1e-4 | sll11348 | G0:0005575 | <1e-4 | sll10563 | G0:0016787 | 0.0719 |
| ssr2317  | G0:0072528 | <1e-4 | slr1163  | G0:0008610 | <1e-4 | sll10361 | G0:0022891 | <1e-4 | sll10503 | G0:0044444 | <1e-4 | sll15067 | G0:0016787 | 0.0719 |
| slr0664  | G0:0055086 | <1e-4 | ssr0692  | G0:0006576 | <1e-4 | slr0872  | G0:0042623 | <1e-4 | sll10230 | G0:0044424 | <1e-4 | ssr0657  | G0:0016787 | 0.0719 |
| sll17033 | G0:0051234 | <1e-4 | slr1900  | G0:0009117 | <1e-4 | sll15044 | G0:0022857 | <1e-4 | ssr1765  | G0:0044464 | <1e-4 | slr1087  | G0:0016787 | 0.0719 |
| slr0238  | G0:0009059 | <1e-4 | sll11495 | G0:0072527 | <1e-4 | slr1917  | G0:0005342 | <1e-4 | slr0975  | G0:0044424 | <1e-4 | ss15025  | G0:0016787 | 0.0719 |
| sll10189 | G0:0009126 | <1e-4 | slr1917  | G0:0042451 | <1e-4 | sll11784 | G0:0022891 | <1e-4 | slr2122  | G0:0005575 | <1e-4 | ss13573  | G0:0016787 | 0.0719 |
| slr0667  | G0:0019637 | <1e-4 | sll17034 | G0:0072521 | <1e-4 | slr0514  | G0:0022892 | <1e-4 | slr1599  | G0:0043226 | <1e-4 | slr6045  | G0:0016787 | 0.0719 |
| slr0404  | G0:0008150 | <1e-4 | slr0262  | G0:0019637 | <1e-4 | ssr8047  | G0:0015291 | <1e-4 | sll11160 | G0:0044424 | <1e-4 | sll11717 | G0:0016787 | 0.0719 |
| ssr6048  | G0:0009889 | <1e-4 | slr0195  | G0:0006220 | <1e-4 | slr1203  | G0:0022857 | <1e-4 | ssr1114  | G0:0044424 | <1e-4 | slr1101  | G0:0016787 | 0.0719 |
| sll10925 | G0:0055082 | <1e-4 | sll11142 | G0:0051186 | <1e-4 | slr1534  | G0:0005342 | <1e-4 | slr1571  | G0:0044424 | <1e-4 | slr0521  | G0:0016787 | 0.0719 |
| slr1442  | G0:0006066 | <1e-4 | slr1174  | G0:0009987 | <1e-4 | slr1068  | G0:0015291 | <1e-4 | ss10787  | G0:0043226 | <1e-4 | ssr3570  | G0:0016787 | 0.0719 |
| sll1469  | G0:0065007 | <1e-4 | slr1071  | G0:0009991 | <1e-4 | slr0924  | G0:0015293 | <1e-4 | sll11643 | G0:0044444 | <1e-4 | slr0865  | G0:0016787 | 0.0719 |
| ssr7079  | G0:0022607 | <1e-4 | ssr2318  | G0:0009132 | <1e-4 | slr1918  | G0:0015077 | <1e-4 | slr0957  | G0:0043226 | <1e-4 | slr0863  | G0:0016787 | 0.0719 |
| slr8022  | G0:0009059 | <1e-4 | slr0325  | G0:0006631 | <1e-4 | slr0957  | G0:0015293 | <1e-4 | slr2000  | G0:0044425 | <1e-4 | slr0888  | G0:0016787 | 0.0719 |
| ssr6048  | G0:0065007 | <1e-4 | sll11072 | G0:0051188 | <1e-4 | slr0392  | G0:0022857 | <1e-4 | sll11426 | G0:0044444 | <1e-4 | ssr0109  | G0:0016787 | 0.0719 |
| sll15097 | G0:0031326 | <1e-4 | slr1074  | G0:0019752 | <1e-4 | sll10047 | G0:0015077 | <1e-4 | slr0392  | G0:0044444 | <1e-4 | sll11254 | G0:0016787 | 0.0719 |
| slr1187  | G0:0051347 | <1e-4 | sll11089 | G0:0006720 | <1e-4 | slr1383  | G0:0008171 | <1e-4 | sll10192 | G0:0005575 | <1e-4 | ssr7079  | G0:0016787 | 0.0719 |
| ssr6003  | G0:0044283 | <1e-4 | sll11411 | G0:0046164 | <1e-4 | slr2010  | G0:0016462 | <1e-4 | slr1812  | G0:0005575 | <1e-4 | sll10736 | G0:0016787 | 0.0719 |
| sll10066 | G0:0031323 | <1e-4 | ss17022  | G0:0051171 | <1e-4 | slr1095  | G0:0016746 | <1e-4 | slr0642  | G0:0044425 | <1e-4 | slr0285  | G0:0016787 | 0.0719 |
| sll11446 | G0:0045184 | <1e-4 | ss10832  | G0:0051186 | <1e-4 | slr1920  | G0:0016462 | <1e-4 | slr0589  | G0:0044444 | <1e-4 | slr2000  | G0:0016787 | 0.0719 |
| slr0656  | G0:0050789 | <1e-4 | sll10656 | G0:0090304 | <1e-4 | slr1169  | G0:0042623 | <1e-4 | slr0588  | G0:0044425 | <1e-4 | slr0269  | G0:0016787 | 0.0719 |
| slr0006  | G0:0090304 | <1e-4 | sll11348 | G0:0071842 | <1e-4 | sll11512 | G0:0043492 | <1e-4 | sll10886 | G0:0044464 | <1e-4 | ss13549  | G0:0016787 | 0.0719 |
| ss17007  | G0:0046907 | <1e-4 | slr1774  | G0:0022411 | <1e-4 | slr1150  | G0:0015075 | <1e-4 | slr1644  | G0:0043226 | <1e-4 | sll11192 | G0:0016787 | 0.0719 |
| sll10293 | G0:0019222 | <1e-4 | sll11757 | G0:0009893 | <1e-4 | ssr5074  | G0:0005342 | <1e-4 | sll10638 | G0:0005575 | <1e-4 | sll11036 | G0:0016787 | 0.0719 |
| sll11797 | G0:0009161 | <1e-4 | slr1920  | G0:0072521 | <1e-4 | slr1468  | G0:0060089 | <1e-4 | ss12471  | G0:0044444 | <1e-4 | sll11068 | G0:0016787 | 0.0719 |
| sll11233 | G0:0031326 | <1e-4 | slr8044  | G0:0044275 | <1e-4 | slr7095  | G0:0022857 | <1e-4 | slr1895  | G0:0044444 | <1e-4 | slr0645  | G0:0016787 | 0.0719 |
| slr1563  | G0:0051234 | <1e-4 | sll10198 | G0:0016053 | <1e-4 | slr0149  | G0:0016741 | <1e-4 | ss13382  | G0:0044425 | <1e-4 | sll11726 | G0:0016787 | 0.0719 |
| slr1970  | G0:0033013 | <1e-4 | sll10284 | G0:0044282 | <1e-4 | sll10761 | G0:0016818 | <1e-4 | slr2117  | G0:0005575 | <1e-4 | ss12595  | G0:0016787 | 0.0719 |
| sll10181 | G0:0044275 | <1e-4 | ssr8013  | G0:0010468 | <1e-4 | slr0285  | G0:0015405 | <1e-4 | slr1462  | G0:0044444 | <1e-4 | slr0397  | G0:0016787 | 0.0719 |
| ss15015  | G0:0050801 | <1e-4 | slr1068  | G0:0048522 | <1e-4 | sll10611 | G0:0060089 | <1e-4 | slr1384  | G0:0005575 | <1e-4 | slr0755  | G0:0016787 | 0.0719 |
| slr1261  | G0:0050801 | <1e-4 | slr1441  | G0:0009199 | <1e-4 | ssr2439  | G0:0022836 | <1e-4 | sll11170 | G0:0044422 | <1e-4 | sll11698 | G0:0016787 | 0.0719 |
| sll18019 | G0:0016052 | <1e-4 | slr6038  | G0:0006220 | <1e-4 | sll10939 | G0:0022838 | <1e-4 | slr1923  | G0:0044422 | <1e-4 | slr6087  | G0:0016787 | 0.0719 |
| ssr6002  | G0:0008610 | <1e-4 | slr6094  | G0:0009260 | <1e-4 | sll10272 | G0:0015399 | <1e-4 | sll11429 | G0:0044444 | <1e-4 | sll11583 | G0:0016787 | 0.0719 |
| sll18012 | G0:0051818 | <1e-4 | sll15003 | G0:0008610 | <1e-4 | sll11233 | G0:0022891 | <1e-4 | slr1827  | G0:0044444 | <1e-4 | sll18040 | G0:0016787 | 0.0719 |
| slr1623  | G0:0009141 | <1e-4 | ssr8047  | G0:0051171 | <1e-4 | slr0264  | G0:0022892 | <1e-4 | slr5073  | G0:0043226 | <1e-4 | ssr2972  | G0:0016787 | 0.0719 |
| slr1261  | G0:0009141 | <1e-4 | sll11573 | G0:0009117 | <1e-4 | slr1852  | G0:0016817 | <1e-4 | sll10325 | G0:0044425 | <1e-4 | slr1681  | G0:0016787 | 0.0719 |
| slr0169  | G0:0006732 | <1e-4 | slr1276  | G0:0009165 | <1e-4 | slr0272  | G0:0060089 | <1e-4 | sll10249 | G0:0044425 | <1e-4 | slr1442  | G0:0016787 | 0.0719 |
| slr1301  | G0:0009056 | <1e-4 | ssr0109  | G0:0008150 | <1e-4 | slr0408  | G0:0015293 | <1e-4 | slr1809  | G0:0005575 | <1e-4 | ssr6089  | G0:0016787 | 0.0719 |

|         |            |       |         |            |       |         |            |       |         |            |       |          |            |        |
|---------|------------|-------|---------|------------|-------|---------|------------|-------|---------|------------|-------|----------|------------|--------|
| slr1464 | G0:0009262 | <1e-4 | ssr6048 | G0:0044283 | <1e-4 | sl11582 | G0:0008171 | <1e-4 | sl10381 | G0:0005575 | <1e-4 | slr0667  | G0:0016787 | 0.0719 |
| sl10071 | G0:0034654 | <1e-4 | slr0709 | G0:0043412 | <1e-4 | sl10614 | G0:0015267 | <1e-4 | slr0108 | G0:0044446 | <1e-4 | slr0731  | G0:0016787 | 0.0719 |
| sl16055 | G0:0050794 | <1e-4 | sl11233 | G0:0072524 | <1e-4 | ssr5020 | G0:0022857 | <1e-4 | sl11714 | G0:0044422 | <1e-4 | sl10044  | G0:0016787 | 0.0719 |
| slr0273 | G0:0044106 | <1e-4 | slr1815 | G0:0019637 | <1e-4 | sl10149 | G0:0016746 | <1e-4 | slr0909 | G0:0044422 | <1e-4 | slr7091  | G0:0016787 | 0.0719 |
| slr2010 | G0:0016053 | <1e-4 | ssl3383 | G0:0044260 | <1e-4 | sl16052 | G0:0005342 | <1e-4 | ssr2843 | G0:0044446 | <1e-4 | ssr3467  | G0:0016787 | 0.0719 |
| ssl5027 | G0:0048523 | <1e-4 | slr1101 | G0:0016053 | <1e-4 | slr0594 | G0:0015267 | <1e-4 | slr0592 | G0:0044446 | <1e-4 | slr6016  | G0:0016787 | 0.0719 |
| slr7101 | G0:0009892 | <1e-4 | slr0199 | G0:0009309 | <1e-4 | sl10410 | G0:0022838 | <1e-4 | sl10372 | G0:0044464 | <1e-4 | slr6029  | G0:0016787 | 0.0719 |
| slr1913 | G0:0009260 | <1e-4 | sl11738 | G0:0009165 | <1e-4 | sl11414 | G0:0060089 | <1e-4 | slr0285 | G0:0044446 | <1e-4 | slr2070  | G0:0016787 | 0.0719 |
| sl17087 | G0:0051716 | <1e-4 | sl11359 | G0:0048519 | <1e-4 | slr1230 | G0:0016462 | <1e-4 | sl15044 | G0:0043226 | <1e-4 | slr0634  | G0:0016787 | 0.0719 |
| slr1998 | G0:0052188 | <1e-4 | sl10586 | G0:0042451 | <1e-4 | sl11388 | G0:0043167 | <1e-4 | slr0699 | G0:0043226 | <1e-4 | sl10060  | G0:0016787 | 0.0719 |
| slr0935 | G0:0072521 | <1e-4 | slr6075 | G0:0044255 | <1e-4 | slr0975 | G0:0022838 | <1e-4 | sl10742 | G0:0044425 | <1e-4 | sl17067  | G0:0016787 | 0.0719 |
| ssl1417 | G0:0009144 | <1e-4 | sl10410 | G0:0046483 | <1e-4 | slr0006 | G0:0015399 | <1e-4 | slr0243 | G0:0005575 | <1e-4 | sl10670  | G0:0016787 | 0.0719 |
| sl11400 | G0:0006631 | <1e-4 | sl11240 | G0:0019362 | <1e-4 | ssr2848 | G0:0022890 | <1e-4 | sl10176 | G0:0043226 | <1e-4 | sl10321  | G0:0016787 | 0.0719 |
| slr1188 | G0:0009126 | <1e-4 | slr1600 | G0:0019752 | <1e-4 | slr6064 | G0:0022891 | <1e-4 | sl10676 | G0:0044446 | <1e-4 | sl17006  | G0:0016787 | 0.0719 |
| sl11902 | G0:0010468 | <1e-4 | sl17069 | G0:0050801 | <1e-4 | sl11692 | G0:0015291 | <1e-4 | ssr3122 | G0:0043226 | <1e-4 | ssr2711  | G0:0016787 | 0.0719 |
| sl10283 | G0:0033013 | <1e-4 | slr1530 | G0:0019637 | <1e-4 | slr2027 | G0:0043167 | <1e-4 | slr1886 | G0:0005575 | <1e-4 | slr1670  | G0:0016787 | 0.0719 |
| slr1235 | G0:0009161 | <1e-4 | slr0769 | G0:0008150 | <1e-4 | slr0334 | G0:0022832 | <1e-4 | slr1939 | G0:0005575 | <1e-4 | ssr6062  | G0:0016787 | 0.0719 |
| ssl0461 | G0:0010468 | <1e-4 | slr0456 | G0:0071840 | <1e-4 | slr1262 | G0:0022857 | <1e-4 | slr1184 | G0:0044446 | <1e-4 | ssl2814  | G0:0016787 | 0.0719 |
| slr1398 | G0:0051246 | <1e-4 | slr0109 | G0:0071841 | <1e-4 | sl11396 | G0:0060089 | <1e-4 | sl11273 | G0:0043226 | <1e-4 | slr0976  | G0:0016787 | 0.0719 |
| slr1601 | G0:0055114 | <1e-4 | sl10702 | G0:0016052 | <1e-4 | ssr1041 | G0:0015075 | <1e-4 | sl10933 | G0:0044444 | <1e-4 | slr6044  | G0:0016787 | 0.0719 |
| ssr2802 | G0:0071842 | <1e-4 | sl11273 | G0:0009260 | <1e-4 | slr0243 | G0:0022891 | <1e-4 | slr1814 | G0:0044425 | <1e-4 | slr2060  | G0:0016787 | 0.0719 |
| slr1959 | G0:0009889 | <1e-4 | slr0147 | G0:0019362 | <1e-4 | slr1276 | G0:0015077 | <1e-4 | sl11874 | G0:0044444 | <1e-4 | slr0271  | G0:0016787 | 0.0719 |
| ssl2971 | G0:0065007 | <1e-4 | sl12007 | G0:0048519 | <1e-4 | slr1799 | G0:0015077 | <1e-4 | slr0404 | G0:0044464 | <1e-4 | slr1886  | G0:0016787 | 0.0719 |
| slr1342 | G0:0019637 | <1e-4 | slr0184 | G0:0043412 | <1e-4 | sl10625 | G0:0022836 | <1e-4 | sl11784 | G0:0044422 | <1e-4 | sl10905  | G0:0016787 | 0.0719 |
| slr0217 | G0:0006066 | <1e-4 | slr1913 | G0:0050896 | <1e-4 | slr1210 | G0:0016818 | <1e-4 | ssr0335 | G0:0044446 | <1e-4 | ssr6078  | G0:0016787 | 0.0719 |
| sl10172 | G0:0009117 | <1e-4 | slr0575 | G0:0044271 | <1e-4 | sl15062 | G0:0022857 | <1e-4 | ssl8039 | G0:0044422 | <1e-4 | slr6081  | G0:0016787 | 0.0719 |
| sl10909 | G0:0034660 | <1e-4 | sl11442 | G0:0071496 | <1e-4 | slr2071 | G0:0022891 | <1e-4 | slr1647 | G0:0044422 | <1e-4 | slr0300  | G0:0016787 | 0.0719 |
| sl10442 | G0:0006066 | <1e-4 | slr6004 | G0:0009123 | <1e-4 | slr1571 | G0:0022832 | <1e-4 | ssl1498 | G0:0044422 | <1e-4 | sl11784  | G0:0016787 | 0.0719 |
| sl11527 | G0:0009126 | <1e-4 | ssl0242 | G0:0071554 | <1e-4 | sl10997 | G0:0008171 | <1e-4 | ssr3304 | G0:0044422 | <1e-4 | sl15004  | G0:0016787 | 0.0719 |
| slr1398 | G0:0051186 | <1e-4 | sl10847 | G0:0006082 | <1e-4 | slr1069 | G0:0043167 | <1e-4 | sl10225 | G0:0044446 | <1e-4 | ssr6027  | G0:0016787 | 0.0719 |
| slr1964 | G0:0009987 | <1e-4 | ssl7022 | G0:0051347 | <1e-4 | slr0304 | G0:0016741 | <1e-4 | ssl2065 | G0:0044425 | <1e-4 | sl11340  | G0:0016787 | 0.0719 |
| slr1340 | G0:0043933 | <1e-4 | ssr2615 | G0:0055086 | <1e-4 | ssr5117 | G0:0015405 | <1e-4 | slr2118 | G0:0005575 | <1e-4 | slr7099  | G0:0016787 | 0.0719 |
| sl10069 | G0:0022607 | <1e-4 | slr0601 | G0:0009394 | <1e-4 | sl10837 | G0:0022892 | <1e-4 | slr0050 | G0:0044444 | <1e-4 | sl10696  | G0:0016787 | 0.0719 |
| sl18012 | G0:0009308 | <1e-4 | sl11651 | G0:0006793 | <1e-4 | ssr2318 | G0:0003674 | <1e-4 | sl11426 | G0:0044425 | <1e-4 | ssr0336  | G0:0016787 | 0.0719 |
| slr1117 | G0:0009889 | <1e-4 | sl10072 | G0:0051186 | <1e-4 | slr1577 | G0:0003674 | <1e-4 | sl15090 | G0:0005575 | <1e-4 | ssr6024  | G0:0016787 | 0.0719 |
| slr0964 | G0:0006732 | <1e-4 | sl11262 | G0:0009117 | <1e-4 | slr1307 | G0:0042623 | <1e-4 | sl10192 | G0:0044444 | <1e-4 | slr5111  | G0:0016787 | 0.0719 |
| sl11262 | G0:0006720 | <1e-4 | sl17077 | G0:0044271 | <1e-4 | slr0211 | G0:0022891 | <1e-4 | sl10905 | G0:0044424 | <1e-4 | ssl1046  | G0:0016787 | 0.0719 |
| slr6064 | G0:0034641 | <1e-4 | slr0360 | G0:0009263 | <1e-4 | sl15004 | G0:0022803 | <1e-4 | slr1809 | G0:0044444 | <1e-4 | slr6091  | G0:0016787 | 0.0719 |
| slr0656 | G0:0071554 | <1e-4 | slr0144 | G0:0034654 | <1e-4 | slr1303 | G0:0015399 | <1e-4 | sl11950 | G0:0005575 | <1e-4 | slr1628  | G0:0016787 | 0.0719 |
| sl11004 | G0:0072522 | <1e-4 | slr7016 | G0:0050896 | <1e-4 | sl10505 | G0:0022892 | <1e-4 | slr1600 | G0:0005575 | <1e-4 | slr1394  | G0:0016787 | 0.0719 |
| ssr6048 | G0:0046164 | <1e-4 | sl10788 | G0:0046164 | <1e-4 | sl10238 | G0:0015293 | <1e-4 | slr0249 | G0:0044446 | <1e-4 | ssl17048 | G0:0016787 | 0.0719 |
| sl11477 | G0:0031323 | <1e-4 | sl11715 | G0:0043436 | <1e-4 | sm10011 | G0:0022892 | <1e-4 | ssl2384 | G0:0044464 | <1e-4 | ssr6083  | G0:0016787 | 0.0719 |
| sl18032 | G0:0009141 | <1e-4 | slr0262 | G0:0044283 | <1e-4 | slr2105 | G0:0015077 | <1e-4 | slr0869 | G0:0043226 | <1e-4 | ssl2064  | G0:0016787 | 0.0719 |
| slr1847 | G0:0008150 | <1e-4 | slr0416 | G0:0046394 | <1e-4 | ssl2781 | G0:0015293 | <1e-4 | sl10735 | G0:0044425 | <1e-4 | slr5102  | G0:0016787 | 0.0719 |
| slr1413 | G0:0006766 | <1e-4 | slr1667 | G0:0034641 | <1e-4 | ssr2912 | G0:0005342 | <1e-4 | sl11946 | G0:0043226 | <1e-4 | slr6104  | G0:0016787 | 0.0719 |
| sl10048 | G0:0006811 | <1e-4 | slr1218 | G0:0050801 | <1e-4 | sl10282 | G0:0022857 | <1e-4 | slr1236 | G0:0044422 | <1e-4 | slr5024  | G0:0016787 | 0.0719 |
| ssl2138 | G0:0009144 | <1e-4 | ssr7093 | G0:0018130 | <1e-4 | ss10738 | G0:0005342 | <1e-4 | slr1394 | G0:0044422 | <1e-4 | slr0291  | G0:0016787 | 0.0719 |
| sl10565 | G0:0031323 | <1e-4 | slr2027 | G0:0051347 | <1e-4 | slr5116 | G0:0043492 | <1e-4 | slr1097 | G0:0044425 | <1e-4 | slr0699  | G0:0016787 | 0.0719 |
| slr0482 | G0:0043933 | <1e-4 | slr1674 | G0:0048518 | <1e-4 | sl11188 | G0:0015077 | <1e-4 | sl15026 | G0:0044422 | <1e-4 | sl10405  | G0:0016787 | 0.0719 |
| sl10451 | G0:0072528 | <1e-4 | slr0780 | G0:0072522 | <1e-4 | slr1753 | G0:0022838 | <1e-4 | slr1718 | G0:0043226 | <1e-4 | slr7073  | G0:0016787 | 0.0719 |
| ssr2787 | G0:0006766 | <1e-4 | sl10238 | G0:0043170 | <1e-4 | sl11318 | G0:0022836 | <1e-4 | slr2042 | G0:0044425 | <1e-4 | ssl17038 | G0:0016787 | 0.0719 |
| slr1690 | G0:0034641 | <1e-4 | sl10266 | G0:0009141 | <1e-4 | slr0334 | G0:0060089 | <1e-4 | slr6051 | G0:0044425 | <1e-4 | slr5112  | G0:0016787 | 0.0719 |
| sl11254 | G0:0010468 | <1e-4 | slr0397 | G0:0019751 | <1e-4 | ssl1918 | G0:0022857 | <1e-4 | ssr7017 | G0:0044424 | <1e-4 | sl10062  | G0:0016787 | 0.0719 |
| slr6106 | G0:0009893 | <1e-4 | slr8021 | G0:0006720 | <1e-4 | ssr6089 | G0:0022836 | <1e-4 | sl15109 | G0:0044425 | <1e-4 | slr7094  | G0:0016787 | 0.0719 |

|         |            |       |         |            |       |         |            |       |         |            |       |         |            |        |
|---------|------------|-------|---------|------------|-------|---------|------------|-------|---------|------------|-------|---------|------------|--------|
| slr1721 | G0:0052188 | <1e-4 | slr0503 | G0:0050789 | <1e-4 | slr6031 | G0:0043167 | <1e-4 | sl17067 | G0:0044446 | <1e-4 | sl11095 | G0:0016787 | 0.0719 |
| ss15114 | G0:0010468 | <1e-4 | slr1339 | G0:0043549 | <1e-4 | slr0667 | G0:0022857 | <1e-4 | slr0924 | G0:0044446 | <1e-4 | sl10678 | G0:0016787 | 0.0719 |
| slr1062 | G0:0006793 | <1e-4 | sl11442 | G0:0006753 | <1e-4 | sl10702 | G0:0016741 | <1e-4 | slr0789 | G0:0005575 | <1e-4 | slr6103 | G0:0016787 | 0.0719 |
| sl10167 | G0:0044283 | <1e-4 | slr1998 | G0:0006721 | <1e-4 | sl11186 | G0:0016462 | <1e-4 | sl10286 | G0:0044425 | <1e-4 | sl11158 | G0:0016787 | 0.0719 |
| sl10639 | G0:0090304 | <1e-4 | slr0784 | G0:0055086 | <1e-4 | ssr2975 | G0:0015075 | <1e-4 | slr7099 | G0:0044464 | <1e-4 | sl15030 | G0:0016787 | 0.0719 |
| slr1098 | G0:0051171 | <1e-4 | slr0569 | G0:0006066 | <1e-4 | sl10505 | G0:0016818 | <1e-4 | slr1534 | G0:0044464 | <1e-4 | sl17033 | G0:0016787 | 0.0719 |
| ss10109 | G0:0071840 | <1e-4 | sl17078 | G0:0051234 | <1e-4 | sl10325 | G0:0022803 | <1e-4 | slr1436 | G0:0044425 | <1e-4 | sl11692 | G0:0016787 | 0.0719 |
| slr0596 | G0:0009123 | <1e-4 | sl10376 | G0:0009260 | <1e-4 | slr6072 | G0:0016462 | <1e-4 | ssr2781 | G0:0005575 | <1e-4 | sl11233 | G0:0016787 | 0.0719 |
| ssr3300 | G0:0022411 | <1e-4 | slr0872 | G0:0065007 | <1e-4 | sl11411 | G0:0043167 | <1e-4 | slr1726 | G0:0005575 | <1e-4 | slr1450 | G0:0016787 | 0.0719 |
| sl11926 | G0:0034654 | <1e-4 | slr0238 | G0:0034660 | <1e-4 | slr0243 | G0:0016462 | <1e-4 | sl11830 | G0:0044422 | <1e-4 | sl10552 | G0:0016787 | 0.0719 |
| slr1084 | G0:0050789 | <1e-4 | slr1880 | G0:0006753 | <1e-4 | slr1880 | G0:0060089 | <1e-4 | sl17087 | G0:0044464 | <1e-4 | sl11531 | G0:0016787 | 0.0719 |
| slr0318 | G0:0034654 | <1e-4 | ss13383 | G0:0016054 | <1e-4 | slr1073 | G0:0022890 | <1e-4 | sl10185 | G0:0044425 | <1e-4 | slr5053 | G0:0016787 | 0.0719 |
| slr0364 | G0:0006066 | <1e-4 | sl11656 | G0:0050801 | <1e-4 | slr0601 | G0:0015077 | <1e-4 | slr1306 | G0:0044424 | <1e-4 | slr1980 | G0:0016787 | 0.0719 |
| sl10703 | G0:0042180 | <1e-4 | slr1726 | G0:0009057 | <1e-4 | slr0204 | G0:0015291 | <1e-4 | sl11396 | G0:0044464 | <1e-4 | slr0948 | G0:0016787 | 0.0719 |
| slr0967 | G0:0010468 | <1e-4 | sl10505 | G0:0051186 | <1e-4 | slr0482 | G0:0015267 | <1e-4 | ss11464 | G0:0044424 | <1e-4 | sl11911 | G0:0016787 | 0.0719 |
| sl10846 | G0:0046128 | <1e-4 | sl10024 | G0:0009132 | <1e-4 | slr0476 | G0:0015405 | <1e-4 | slr5101 | G0:0044446 | <1e-4 | ssr5092 | G0:0016787 | 0.0719 |
| sl10101 | G0:0060255 | <1e-4 | ss10483 | G0:0043549 | <1e-4 | ssr3571 | G0:0022838 | <1e-4 | sl10236 | G0:0043226 | <1e-4 | sl10157 | G0:0016787 | 0.0719 |
| slr0509 | G0:0043549 | <1e-4 | sl11965 | G0:0051186 | <1e-4 | sl17077 | G0:0015077 | <1e-4 | slr0337 | G0:0044444 | <1e-4 | slr1114 | G0:0016787 | 0.0719 |
| slr0521 | G0:0019637 | <1e-4 | slr2010 | G0:0044003 | <1e-4 | slr5111 | G0:0008171 | <1e-4 | slr0670 | G0:0043226 | <1e-4 | slr0345 | G0:0016787 | 0.0719 |
| sl10822 | G0:0052188 | <1e-4 | ssr5106 | G0:0050794 | <1e-4 | slr1353 | G0:0015293 | <1e-4 | slr0818 | G0:0005575 | <1e-4 | ss17074 | G0:0016787 | 0.0719 |
| slr1493 | G0:0009142 | <1e-4 | slr0453 | G0:0009132 | <1e-4 | sl10702 | G0:0015399 | <1e-4 | sl11217 | G0:0044424 | <1e-4 | slr0498 | G0:0016787 | 0.0719 |
| sl10284 | G0:0006082 | <1e-4 | slr0023 | G0:0006721 | <1e-4 | sl18001 | G0:0015291 | <1e-4 | slr1068 | G0:0044424 | <1e-4 | slr0771 | G0:0016787 | 0.0719 |
| ssr6020 | G0:0006091 | <1e-4 | slr0872 | G0:0009161 | <1e-4 | slr0680 | G0:0042623 | <1e-4 | ss12971 | G0:0005575 | <1e-4 | slr8044 | G0:0016787 | 0.0719 |
| ss18005 | G0:0043648 | <1e-4 | slr0431 | G0:0006721 | <1e-4 | slr7013 | G0:0022838 | <1e-4 | slr0670 | G0:0044464 | <1e-4 | slr0670 | G0:0016787 | 0.0719 |
| sl10031 | G0:0009124 | <1e-4 | slr0729 | G0:0006733 | <1e-4 | sl10188 | G0:0043492 | <1e-4 | sl11071 | G0:0044446 | <1e-4 | ssr8047 | G0:0016787 | 0.0719 |
| sl11318 | G0:0019222 | <1e-4 | ssr1768 | G0:0072527 | <1e-4 | ss11377 | G0:0016817 | <1e-4 | sl10424 | G0:0044446 | <1e-4 | slr2110 | G0:0016787 | 0.0719 |
| sl11749 | G0:0006163 | <1e-4 | ss18005 | G0:0055114 | <1e-4 | slr7099 | G0:0022803 | <1e-4 | sl11609 | G0:0005575 | <1e-4 | slr0708 | G0:0016787 | 0.0719 |
| slr0770 | G0:0072527 | <1e-4 | sl11378 | G0:0019637 | <1e-4 | slr1474 | G0:0005342 | <1e-4 | sl10524 | G0:0044446 | <1e-4 | sl17034 | G0:0016787 | 0.0719 |
| slr2049 | G0:0019752 | <1e-4 | slr0729 | G0:0009123 | <1e-4 | ssr5074 | G0:0016746 | <1e-4 | slr1676 | G0:0044446 | <1e-4 | sl10298 | G0:0016787 | 0.0719 |
| sl10760 | G0:0051234 | <1e-4 | sl10804 | G0:0051234 | <1e-4 | sl11752 | G0:0022891 | <1e-4 | slr1218 | G0:0044424 | <1e-4 | sl10372 | G0:0016787 | 0.0719 |
| ss12971 | G0:0072522 | <1e-4 | slr1533 | G0:0019222 | <1e-4 | slr0812 | G0:0015405 | <1e-4 | slr2092 | G0:0044422 | <1e-4 | slr7060 | G0:0016787 | 0.0719 |
| sl11054 | G0:0006163 | <1e-4 | sl10101 | G0:0071840 | <1e-4 | slr7080 | G0:0008171 | <1e-4 | slr0294 | G0:0044446 | <1e-4 | sl10925 | G0:0016787 | 0.0719 |
| sl11006 | G0:0060255 | <1e-4 | sl11632 | G0:0043436 | <1e-4 | sl12011 | G0:0060089 | <1e-4 | slr0400 | G0:0005575 | <1e-4 | sl10875 | G0:0016787 | 0.0719 |
| sl16055 | G0:0033013 | <1e-4 | slr0356 | G0:0050794 | <1e-4 | sl10272 | G0:0022832 | <1e-4 | sl10268 | G0:0005575 | <1e-4 | slr5037 | G0:0016787 | 0.0719 |
| sl17064 | G0:0055086 | <1e-4 | slr0909 | G0:0006082 | <1e-4 | sl10647 | G0:0022890 | <1e-4 | sl10360 | G0:0044424 | <1e-4 | ssr6002 | G0:0016787 | 0.0719 |
| slr1098 | G0:0006066 | <1e-4 | slr1259 | G0:0034660 | <1e-4 | ssr2803 | G0:0003674 | <1e-4 | slr0619 | G0:0005575 | <1e-4 | sl11940 | G0:0016787 | 0.0719 |
| slr1957 | G0:0043170 | <1e-4 | ssr2009 | G0:0009161 | <1e-4 | slr1101 | G0:0008171 | <1e-4 | ssr6024 | G0:0044446 | <1e-4 | ssr2067 | G0:0016787 | 0.0719 |
| slr1611 | G0:0042180 | <1e-4 | sl10595 | G0:0090304 | <1e-4 | sl10309 | G0:0015077 | <1e-4 | ss13383 | G0:0044422 | <1e-4 | slr0590 | G0:0016787 | 0.0719 |
| sl10503 | G0:0009132 | <1e-4 | slr0586 | G0:0005996 | <1e-4 | ssr1155 | G0:0043492 | <1e-4 | sl11882 | G0:0044425 | <1e-4 | slr1570 | G0:0016787 | 0.0719 |
| ss17042 | G0:0060255 | <1e-4 | slr1071 | G0:0071554 | <1e-4 | slr0667 | G0:0015293 | <1e-4 | slr7101 | G0:0043226 | <1e-4 | sl11373 | G0:0016787 | 0.0719 |
| slr7100 | G0:0019752 | <1e-4 | slr0919 | G0:0019219 | <1e-4 | slr1704 | G0:0022832 | <1e-4 | slr1342 | G0:0005575 | <1e-4 | slr1170 | G0:0016787 | 0.0719 |
| sl11247 | G0:0051246 | <1e-4 | ss15027 | G0:0042180 | <1e-4 | slr2111 | G0:0043167 | <1e-4 | slr0937 | G0:0005575 | <1e-4 | slr1474 | G0:0016787 | 0.0719 |
| sl10863 | G0:0048523 | <1e-4 | sl10658 | G0:0043436 | <1e-4 | slr0937 | G0:0022836 | <1e-4 | sl11186 | G0:0044422 | <1e-4 | slr0325 | G0:0016787 | 0.0719 |
| slr1383 | G0:0065007 | <1e-4 | sl10678 | G0:0009132 | <1e-4 | sl10861 | G0:0060089 | <1e-4 | ssr2553 | G0:0043226 | <1e-4 | slr2103 | G0:0016787 | 0.0719 |
| sl10283 | G0:0019637 | <1e-4 | sl15128 | G0:0046164 | <1e-4 | slr1657 | G0:0022891 | <1e-4 | slr0609 | G0:0044422 | <1e-4 | sl11151 | G0:0016787 | 0.0719 |
| slr5012 | G0:0009165 | <1e-4 | slr2121 | G0:0051716 | <1e-4 | slr7011 | G0:0015075 | <1e-4 | sl11934 | G0:0044446 | <1e-4 | ssr7093 | G0:0016787 | 0.0719 |
| sl10564 | G0:0034641 | <1e-4 | slr0613 | G0:0051347 | <1e-4 | slr1789 | G0:0008171 | <1e-4 | sl18011 | G0:0044425 | <1e-4 | sl11464 | G0:0016787 | 0.0719 |
| slr0818 | G0:0018130 | <1e-4 | sl10413 | G0:0009117 | <1e-4 | slr2038 | G0:0022838 | <1e-4 | sl11835 | G0:0005575 | <1e-4 | ss15103 | G0:0016787 | 0.0719 |
| sl10543 | G0:0044282 | <1e-4 | ssr0336 | G0:0019752 | <1e-4 | slr1668 | G0:0015399 | <1e-4 | ss11923 | G0:0044422 | <1e-4 | ssr1155 | G0:0016787 | 0.0719 |
| slr1681 | G0:0042180 | <1e-4 | slr1034 | G0:0050789 | <1e-4 | sl10630 | G0:0015267 | <1e-4 | sl11250 | G0:0044424 | <1e-4 | ss15113 | G0:0016787 | 0.0719 |
| sl11512 | G0:0051818 | <1e-4 | slr5024 | G0:0034641 | <1e-4 | slr1658 | G0:0008171 | <1e-4 | slr0607 | G0:0044464 | <1e-4 | sl11898 | G0:0016787 | 0.0719 |
| sl10381 | G0:0009126 | <1e-4 | sl10595 | G0:0009889 | <1e-4 | slr0195 | G0:0022832 | <1e-4 | slr1425 | G0:0005575 | <1e-4 | ssr1041 | G0:0016787 | 0.0719 |
| slr1407 | G0:0009141 | <1e-4 | slr6021 | G0:0072524 | <1e-4 | slr2004 | G0:0022803 | <1e-4 | ss11004 | G0:0005575 | <1e-4 | sl11285 | G0:0016787 | 0.0719 |
| sl11651 | G0:0072527 | <1e-4 | slr2048 | G0:0009124 | <1e-4 | slr0751 | G0:0022857 | <1e-4 | slr1919 | G0:0044444 | <1e-4 | ssr1473 | G0:0016787 | 0.0719 |

slr0813 G0:0050789 <1e-4 sll1675 G0:0006576 <1e-4 slr1431 G0:0015291 <1e-4 slr8044 G0:0044422 <1e-4 slr0575 G0:0016787 0.0719  
sll10473 G0:0072527 <1e-4 sll10451 G0:0009150 <1e-4 ssl7051 G0:0015405 <1e-4 slr1648 G0:0044425 <1e-4 sssr5121 G0:0016787 0.0719  
ssl13573 G0:0006220 <1e-4 slr0642 G0:0008150 <1e-4 sll11163 G0:0015267 <1e-4 slr1573 G0:0043226 <1e-4 sll10839 G0:0016787 0.0719  
sll17062 G0:0006766 <1e-4 sll11915 G0:0043170 <1e-4 slr1865 G0:0005342 <1e-4 slr1505 G0:0044446 <1e-4 ssl11263 G0:0016787 0.0719  
slr0211 G0:0044255 <1e-4 slr2111 G0:0009260 <1e-4 sll10103 G0:0022890 <1e-4 sll10586 G0:0044464 <1e-4 sll11188 G0:0016787 0.0719  
sll10192 G0:0043648 <1e-4 ssl10738 G0:0072524 <1e-4 slr11179 G0:0003674 <1e-4 slr0272 G0:0043226 <1e-4 sll16055 G0:0016787 0.0719  
ssl2595 G0:0009308 <1e-4 sll11400 G0:0055114 <1e-4 sll11726 G0:0015075 <1e-4 sll10497 G0:0044446 <1e-4 slr0967 G0:0016787 0.0719  
slr1790 G0:0009262 <1e-4 slr1396 G0:0080090 <1e-4 slr0271 G0:0016741 <1e-4 ssl2920 G0:0044446 <1e-4 ssl0788 G0:0016787 0.0719  
sll10596 G0:0010556 <1e-4 slr0423 G0:0046164 <1e-4 sll10595 G0:0016462 <1e-4 slr1600 G0:0044444 <1e-4 slr1935 G0:0016787 0.0719  
ssr3410 G0:0050896 <1e-4 slr1915 G0:0019222 <1e-4 slr0810 G0:0022891 <1e-4 slr5115 G0:0043226 <1e-4 ssl17042 G0:0016787 0.0719  
ssr6002 G0:0055114 <1e-4 slr0787 G0:0071496 <1e-4 slr0398 G0:0016817 <1e-4 slr0930 G0:0005575 <1e-4 slr1780 G0:0016787 0.0719  
sll10160 G0:0009893 <1e-4 sll11433 G0:0050794 <1e-4 sll11898 G0:0016462 <1e-4 sll11054 G0:0005575 <1e-4 slr8022 G0:0016787 0.0719  
sll11654 G0:0055086 <1e-4 sll11950 G0:0019222 <1e-4 slr0845 G0:0022836 <1e-4 sll10141 G0:0044444 <1e-4 slr1142 G0:0016787 0.0719  
ssr3467 G0:0052188 <1e-4 sssr0536 G0:0001932 <1e-4 slr0769 G0:0008171 <1e-4 slr1230 G0:0005575 <1e-4 sll11319 G0:0016787 0.0719  
sll10810 G0:0031640 <1e-4 slr0060 G0:0009161 <1e-4 ssl0461 G0:0022803 <1e-4 sssr1768 G0:0044444 <1e-4 sssr2318 G0:0016787 0.0719  
sll10552 G0:0050896 <1e-4 sll11530 G0:0050789 <1e-4 sll18012 G0:0043167 <1e-4 slr0023 G0:0043226 <1e-4 slr1970 G0:0016787 0.0719  
ssr2912 G0:0055114 <1e-4 slr1618 G0:0055086 <1e-4 slr0318 G0:0016741 <1e-4 sssr5011 G0:0044444 <1e-4 sll10847 G0:0016787 0.0719  
sll10656 G0:0051716 <1e-4 ssl3692 G0:0009124 <1e-4 sssr2781 G0:0003674 <1e-4 slr2105 G0:0044424 <1e-4 sssr2802 G0:0016787 0.0719  
slr0453 G0:0009144 <1e-4 sssr6089 G0:0010468 <1e-4 ssl0461 G0:0016741 <1e-4 sll11532 G0:0044422 <1e-4 slr0651 G0:0016787 0.0719  
sll11049 G0:0009057 <1e-4 slr0482 G0:0009141 <1e-4 slr2027 G0:0043492 <1e-4 slr1944 G0:0044444 <1e-4 sll11785 G0:0016787 0.0719  
sll11426 G0:0044281 <1e-4 slr0039 G0:0006091 <1e-4 sll11095 G0:0015075 <1e-4 sll18004 G0:0043226 <1e-4 slr1163 G0:0016787 0.0719  
sll10297 G0:0001932 <1e-4 sssr0332 G0:0046164 <1e-4 ssl2148 G0:0022890 <1e-4 slr1690 G0:0044446 <1e-4 slr1173 G0:0016787 0.0719  
sll11442 G0:0009394 <1e-4 sll10283 G0:0044282 <1e-4 slr0801 G0:0016746 <1e-4 sll10451 G0:0043226 <1e-4 slr1577 G0:0016787 0.0719  
slr1895 G0:0009893 <1e-4 sll10192 G0:0009150 <1e-4 slr0364 G0:0016818 <1e-4 sll10737 G0:0005575 <1e-4 sll18011 G0:0016787 0.0719  
sll16054 G0:0009144 <1e-4 sll11866 G0:0009199 <1e-4 sll10023 G0:0015399 <1e-4 sll10513 G0:0044425 <1e-4 ssl12162 G0:0016787 0.0719  
ssr8013 G0:0060255 <1e-4 sll10761 G0:0044283 <1e-4 slr0168 G0:0015075 <1e-4 sll10167 G0:0044424 <1e-4 ssl5091 G0:0016787 0.0719  
slr0592 G0:0042180 <1e-4 sssr2422 G0:0009132 <1e-4 slr7026 G0:0016817 <1e-4 sll10267 G0:0044464 <1e-4 slr0587 G0:0016787 0.0719  
sll11652 G0:0044282 <1e-4 sll11318 G0:0034654 <1e-4 slr0980 G0:0043167 <1e-4 slr1290 G0:0044424 <1e-4 sll11573 G0:0016787 0.0719  
slr1911 G0:0042455 <1e-4 sssr7017 G0:0010468 <1e-4 sssr2754 G0:0022836 <1e-4 sll10414 G0:0044425 <1e-4 sll10565 G0:0016787 0.0719  
slr0398 G0:0019751 <1e-4 sll15006 G0:0009199 <1e-4 slr0356 G0:0022832 <1e-4 sll11511 G0:0005575 <1e-4 sll17028 G0:0016787 0.0719  
slr0514 G0:0010556 <1e-4 slr1210 G0:0009262 <1e-4 sll11512 G0:0016818 <1e-4 sll11726 G0:0044425 <1e-4 slr0613 G0:0016787 0.0719  
sll17047 G0:0043648 <1e-4 slr1875 G0:0034654 <1e-4 sll10359 G0:0022803 <1e-4 sll11053 G0:0044444 <1e-4 slr0813 G0:0016787 0.0719  
slr1101 G0:0051716 <1e-4 sll11469 G0:0072524 <1e-4 sssr2975 G0:0043167 <1e-4 slr0818 G0:0044425 <1e-4 sll11476 G0:0016787 0.0719  
slr6101 G0:0009260 <1e-4 sll10786 G0:0009165 <1e-4 sssr1768 G0:0015077 <1e-4 sll15006 G0:0044464 <1e-4 sll11131 G0:0016787 0.0719  
slr0325 G0:0005996 <1e-4 ssl12069 G0:0009262 <1e-4 slr0023 G0:0016741 <1e-4 slr1429 G0:0044425 <1e-4 sll11495 G0:0016787 0.0719  
slr0740 G0:0031326 <1e-4 slr1918 G0:0009161 <1e-4 ssl12069 G0:0015267 <1e-4 sll11433 G0:0005575 <1e-4 sll10249 G0:0016787 0.0719  
sll11671 G0:0009132 <1e-4 slr6094 G0:0048518 <1e-4 sll11106 G0:0043492 <1e-4 sll11447 G0:0044424 <1e-4 slr5101 G0:0016787 0.0719  
slr6075 G0:0055082 <1e-4 ssl2420 G0:0019752 <1e-4 sll10508 G0:0042623 <1e-4 slr1863 G0:0044425 <1e-4 slr1752 G0:0016787 0.0719  
slr0885 G0:0006720 <1e-4 sll11414 G0:0044003 <1e-4 sssr0102 G0:0022832 <1e-4 slr1799 G0:0044446 <1e-4 sll17050 G0:0016787 0.0719  
slr1045 G0:0034641 <1e-4 slr5101 G0:0050896 <1e-4 slr0453 G0:0022892 <1e-4 slr1840 G0:0044446 <1e-4 sssr2047 G0:0016787 0.0719  
slr1614 G0:0019752 <1e-4 sll10359 G0:0009117 <1e-4 sll10645 G0:0022838 <1e-4 sll10732 G0:0043226 <1e-4 slr1236 G0:0016787 0.0719  
sll11675 G0:0019222 <1e-4 ssl11046 G0:0006220 <1e-4 sll10023 G0:0022836 <1e-4 sll11726 G0:0043226 <1e-4 slr0709 G0:0016787 0.0719  
slr7095 G0:0009132 <1e-4 ssl12749 G0:0046128 <1e-4 sll11830 G0:0043167 <1e-4 slr1704 G0:0043226 <1e-4 sll10479 G0:0016787 0.0719  
slr0303 G0:0008150 <1e-4 sll11273 G0:0009126 <1e-4 slr0348 G0:0015075 <1e-4 slr6004 G0:0044424 <1e-4 ssl0410 G0:0016787 0.0719  
slr1071 G0:0009262 <1e-4 slr0545 G0:0048522 <1e-4 slr0784 G0:0022892 <1e-4 sll11691 G0:0044444 <1e-4 sll17087 G0:0016787 0.0719  
sll11715 G0:0009263 <1e-4 sll11072 G0:0009056 <1e-4 sll11219 G0:0015291 <1e-4 slr0872 G0:0043226 <1e-4 slr0689 G0:0016787 0.0719  
slr1920 G0:0072524 <1e-4 sll10062 G0:0044283 <1e-4 sll11170 G0:0022836 <1e-4 slr0468 G0:0044446 <1e-4 ssl1378 G0:0016787 0.0719  
sll10274 G0:0009059 <1e-4 slr1097 G0:0006631 <1e-4 slr0848 G0:0043167 <1e-4 sll11898 G0:0005575 <1e-4 slr0013 G0:0016787 0.0719  
slr1790 G0:0044260 <1e-4 sssr2754 G0:0009199 <1e-4 slr0243 G0:0015405 <1e-4 sll10103 G0:0044425 <1e-4 slr0106 G0:0016787 0.0719  
ssr2142 G0:0018130 <1e-4 ssl11792 G0:0052111 <1e-4 ssl11972 G0:0015405 <1e-4 slr0453 G0:0043226 <1e-4 sssr3402 G0:0016787 0.0719  
slr6031 G0:0048522 <1e-4 ssl11417 G0:0055086 <1e-4 sll10661 G0:0043167 <1e-4 slr0459 G0:0044444 <1e-4 slr0453 G0:0016787 0.0719  
slr1437 G0:0009056 <1e-4 ssl11263 G0:0005996 <1e-4 sll11348 G0:0016818 <1e-4 slr1767 G0:0044444 <1e-4 sll17089 G0:0016787 0.0719  
ssr7035 G0:0019751 <1e-4 slr0667 G0:0006720 <1e-4 sll15089 G0:0022857 <1e-4 slr5112 G0:0005575 <1e-4 sssr1768 G0:0016787 0.0719  
ssl12749 G0:0008150 <1e-4 slr0909 G0:0072524 <1e-4 sll11934 G0:0022891 <1e-4 slr2038 G0:0044422 <1e-4 slr2004 G0:0016787 0.0719

|         |            |       |         |            |       |         |            |       |          |            |       |         |            |        |
|---------|------------|-------|---------|------------|-------|---------|------------|-------|----------|------------|-------|---------|------------|--------|
| sl17050 | G0:0071840 | <1e-4 | slr0362 | G0:0044271 | <1e-4 | sl10661 | G0:0015267 | <1e-4 | slr0654  | G0:0044425 | <1e-4 | slr1449 | G0:0016787 | 0.0719 |
| slr0771 | G0:0006811 | <1e-4 | slr1541 | G0:0046164 | <1e-4 | slr1864 | G0:0015075 | <1e-4 | slr1210  | G0:0044422 | <1e-4 | slr0812 | G0:0016787 | 0.0719 |
| ssl0410 | G0:0009150 | <1e-4 | slr0208 | G0:0090304 | <1e-4 | slr1240 | G0:0022857 | <1e-4 | ssl17048 | G0:0044424 | <1e-4 | sl10608 | G0:0016787 | 0.0719 |
| slr1648 | G0:0009150 | <1e-4 | slr0656 | G0:0044260 | <1e-4 | slr1178 | G0:0022891 | <1e-4 | sl10355  | G0:0005575 | <1e-4 | slr2012 | G0:0016787 | 0.0719 |
| slr0689 | G0:0009394 | <1e-4 | slr0553 | G0:0006766 | <1e-4 | slr7023 | G0:0022803 | <1e-4 | slr1557  | G0:0044424 | <1e-4 | sl11321 | G0:0016787 | 0.0719 |
| slr0199 | G0:0031323 | <1e-4 | ssr0761 | G0:0046907 | <1e-4 | ssl2009 | G0:0016462 | <1e-4 | sl11797  | G0:0044446 | <1e-4 | slr1406 | G0:0016787 | 0.0719 |
| sl11714 | G0:0022607 | <1e-4 | sl10294 | G0:0009263 | <1e-4 | sl10487 | G0:0022832 | <1e-4 | slr1259  | G0:0044424 | <1e-4 | ssl5008 | G0:0016787 | 0.0719 |
| slr0885 | G0:0043170 | <1e-4 | slr1339 | G0:0009893 | <1e-4 | sl15062 | G0:0022836 | <1e-4 | ssr3409  | G0:0044446 | <1e-4 | slr7100 | G0:0016787 | 0.0719 |
| sl10659 | G0:0009309 | <1e-4 | slr1084 | G0:0006631 | <1e-4 | slr0581 | G0:0016741 | <1e-4 | ssr1425  | G0:0005575 | <1e-4 | slr0184 | G0:0016787 | 0.0719 |
| slr0959 | G0:0009165 | <1e-4 | slr0937 | G0:0009991 | <1e-4 | sl15044 | G0:0043492 | <1e-4 | sl10241  | G0:0044444 | <1e-4 | sl12007 | G0:0009058 | 0.0711 |
| slr0232 | G0:0051246 | <1e-4 | slr1363 | G0:0043933 | <1e-4 | ssr0109 | G0:0022832 | <1e-4 | slr1415  | G0:0044422 | <1e-4 | sl10661 | G0:0009058 | 0.0711 |
| slr7098 | G0:0009987 | <1e-4 | ssr6027 | G0:0006811 | <1e-4 | slr0263 | G0:0022803 | <1e-4 | slr1178  | G0:0043226 | <1e-4 | slr0810 | G0:0009058 | 0.0711 |
| sl11009 | G0:0048519 | <1e-4 | sl11608 | G0:0052111 | <1e-4 | slr1572 | G0:0022891 | <1e-4 | ssr5117  | G0:0044464 | <1e-4 | sl10898 | G0:0009058 | 0.0695 |
| sl17064 | G0:0072522 | <1e-4 | sl11251 | G0:0046128 | <1e-4 | ssr6078 | G0:0015077 | <1e-4 | ssr2318  | G0:0005575 | <1e-4 | slr1773 | G0:0009058 | 0.0695 |
| sl11630 | G0:0033013 | <1e-4 | sl11979 | G0:0051186 | <1e-4 | sl10659 | G0:0022803 | <1e-4 | slr1102  | G0:0005575 | <1e-4 | slr0108 | G0:0009058 | 0.0695 |
| slr0169 | G0:0051234 | <1e-4 | ssl0787 | G0:0050896 | <1e-4 | sl10577 | G0:0016746 | <1e-4 | slr0111  | G0:0044422 | <1e-4 | sl10815 | G0:0003723 | 0.0672 |
| sl10742 | G0:0009165 | <1e-4 | ssl2814 | G0:0046164 | <1e-4 | slr0771 | G0:0015075 | <1e-4 | ssr1951  | G0:0005575 | <1e-4 | sl10775 | G0:0003723 | 0.0672 |
| sl10282 | G0:0046907 | <1e-4 | sl10350 | G0:0009308 | <1e-4 | slr6072 | G0:0015399 | <1e-4 | slr0013  | G0:0044425 | <1e-4 | sl10863 | G0:0003723 | 0.0672 |
| slr1052 | G0:0052111 | <1e-4 | slr1195 | G0:0008150 | <1e-4 | sl10539 | G0:0022803 | <1e-4 | ssr3129  | G0:0044446 | <1e-4 | sl10369 | G0:0003723 | 0.0672 |
| slr0645 | G0:0043933 | <1e-4 | ssr5074 | G0:0009124 | <1e-4 | slr5013 | G0:0016746 | <1e-4 | slr0863  | G0:0044464 | <1e-4 | slr6015 | G0:0003723 | 0.0672 |
| sl11656 | G0:0044271 | <1e-4 | slr1885 | G0:0044248 | <1e-4 | sl10615 | G0:0043167 | <1e-4 | sl11873  | G0:0044425 | <1e-4 | ssr3341 | G0:0003723 | 0.0672 |
| ssr1552 | G0:0071496 | <1e-4 | ssl2138 | G0:0009262 | <1e-4 | sl10780 | G0:0042623 | <1e-4 | sl10405  | G0:0044464 | <1e-4 | slr1179 | G0:0003723 | 0.0672 |
| slr1800 | G0:0044003 | <1e-4 | slr0398 | G0:0051171 | <1e-4 | sl15046 | G0:0043492 | <1e-4 | sl10499  | G0:0005575 | <1e-4 | sl11638 | G0:0003723 | 0.0672 |
| sl10837 | G0:0019752 | <1e-4 | sl11109 | G0:0009150 | <1e-4 | slr0751 | G0:0016817 | <1e-4 | ssl2069  | G0:0005575 | <1e-4 | slr1657 | G0:0003723 | 0.0672 |
| slr6022 | G0:0016054 | <1e-4 | slr0575 | G0:0050789 | <1e-4 | slr0489 | G0:0022803 | <1e-4 | sl11737  | G0:0044422 | <1e-4 | sl10218 | G0:0003723 | 0.0672 |
| sl11225 | G0:0042180 | <1e-4 | ssr6083 | G0:0006721 | <1e-4 | sl11563 | G0:0022891 | <1e-4 | slr1362  | G0:0005575 | <1e-4 | slr0489 | G0:0003723 | 0.0672 |
| slr0291 | G0:0009150 | <1e-4 | sl11174 | G0:0031326 | <1e-4 | sl10553 | G0:0003674 | <1e-4 | slr2110  | G0:0044424 | <1e-4 | slr7023 | G0:0003723 | 0.0672 |
| sl10780 | G0:0048518 | <1e-4 | sl11273 | G0:0044271 | <1e-4 | slr1956 | G0:0022892 | <1e-4 | sl11942  | G0:0044425 | <1e-4 | sl11396 | G0:0003723 | 0.0672 |
| sl17031 | G0:0009259 | <1e-4 | sl11634 | G0:0044003 | <1e-4 | sl10172 | G0:0008171 | <1e-4 | sl10596  | G0:0005575 | <1e-4 | ssl2245 | G0:0003723 | 0.0672 |
| sl10872 | G0:0044003 | <1e-4 | slr0065 | G0:0019222 | <1e-4 | slr6073 | G0:0015293 | <1e-4 | ssl0788  | G0:0044424 | <1e-4 | slr6064 | G0:0003723 | 0.0672 |
| slr2070 | G0:0008610 | <1e-4 | slr0151 | G0:0051716 | <1e-4 | slr0816 | G0:0015291 | <1e-4 | ssl1378  | G0:0044424 | <1e-4 | sl11691 | G0:0003723 | 0.0672 |
| sl11119 | G0:0009150 | <1e-4 | sl10023 | G0:0006766 | <1e-4 | ssr6020 | G0:0015075 | <1e-4 | ssr5117  | G0:0005575 | <1e-4 | slr1363 | G0:0003723 | 0.0672 |
| slr2111 | G0:0071841 | <1e-4 | sl10875 | G0:0019752 | <1e-4 | slr0725 | G0:0003674 | <1e-4 | ssr1407  | G0:0044424 | <1e-4 | slr1753 | G0:0003723 | 0.0672 |
| slr7060 | G0:0044248 | <1e-4 | sl10376 | G0:0008610 | <1e-4 | slr1614 | G0:0043167 | <1e-4 | sl10269  | G0:0044422 | <1e-4 | sl11510 | G0:0003723 | 0.0672 |
| slr0818 | G0:0009161 | <1e-4 | slr0326 | G0:0048522 | <1e-4 | ssl2138 | G0:0022891 | <1e-4 | slr1288  | G0:0043226 | <1e-4 | sl10176 | G0:0003723 | 0.0672 |
| slr0553 | G0:0050789 | <1e-4 | slr1648 | G0:0006066 | <1e-4 | sl10447 | G0:0016818 | <1e-4 | sl10585  | G0:0044464 | <1e-4 | sl11252 | G0:0003723 | 0.0672 |
| slr1103 | G0:0046907 | <1e-4 | slr1376 | G0:0009259 | <1e-4 | slr1188 | G0:0022803 | <1e-4 | ssr2551  | G0:0043226 | <1e-4 | sl18033 | G0:0003723 | 0.0672 |
| slr1935 | G0:0009309 | <1e-4 | sl11654 | G0:0009987 | <1e-4 | slr0848 | G0:0015291 | <1e-4 | sl11583  | G0:0005575 | <1e-4 | slr6005 | G0:0003723 | 0.0672 |
| slr0650 | G0:0006811 | <1e-4 | sl10585 | G0:0042451 | <1e-4 | slr7091 | G0:0022832 | <1e-4 | ssr8013  | G0:0044422 | <1e-4 | sl11401 | G0:0003723 | 0.0672 |
| sl10188 | G0:0071842 | <1e-4 | sl18004 | G0:0055114 | <1e-4 | sl10543 | G0:0043492 | <1e-4 | slr1391  | G0:0044424 | <1e-4 | slr0058 | G0:0003723 | 0.0672 |
| sl10703 | G0:0016054 | <1e-4 | slr1340 | G0:0019637 | <1e-4 | slr0588 | G0:0042623 | <1e-4 | ssl1004  | G0:0044444 | <1e-4 | slr0552 | G0:0003723 | 0.0672 |
| slr1173 | G0:0048878 | <1e-4 | slr1977 | G0:0046907 | <1e-4 | slr0709 | G0:0022838 | <1e-4 | sl15028  | G0:0044425 | <1e-4 | slr0264 | G0:0003723 | 0.0672 |
| slr0294 | G0:0006721 | <1e-4 | slr1612 | G0:0006720 | <1e-4 | sl10069 | G0:0022803 | <1e-4 | sl11582  | G0:0043226 | <1e-4 | sl10611 | G0:0003723 | 0.0672 |
| sl11217 | G0:0034641 | <1e-4 | ssr6085 | G0:0051246 | <1e-4 | slr0148 | G0:0043492 | <1e-4 | sl11265  | G0:0044464 | <1e-4 | sl15046 | G0:0003723 | 0.0672 |
| slr0594 | G0:0044106 | <1e-4 | slr1768 | G0:0051188 | <1e-4 | slr1470 | G0:0022803 | <1e-4 | slr1177  | G0:0044446 | <1e-4 | slr6074 | G0:0003723 | 0.0672 |
| sl10803 | G0:0051246 | <1e-4 | sl11162 | G0:0044003 | <1e-4 | ssl1464 | G0:0003674 | <1e-4 | sl11193  | G0:0043226 | <1e-4 | sl10063 | G0:0003723 | 0.0672 |
| sl10630 | G0:0046164 | <1e-4 | sl10192 | G0:0043170 | <1e-4 | sl10875 | G0:0003674 | <1e-4 | sl16055  | G0:0044424 | <1e-4 | ssr5020 | G0:0003723 | 0.0672 |
| slr1195 | G0:0019751 | <1e-4 | sl10588 | G0:0051818 | <1e-4 | ssl3573 | G0:0003674 | <1e-4 | ssr7035  | G0:0044444 | <1e-4 | slr0388 | G0:0003723 | 0.0672 |
| sl11526 | G0:0009259 | <1e-4 | slr1056 | G0:0044281 | <1e-4 | slr1644 | G0:0003674 | <1e-4 | slr0479  | G0:0005575 | <1e-4 | sl10630 | G0:0003723 | 0.0672 |
| ssr6089 | G0:0048519 | <1e-4 | sl10274 | G0:0043549 | <1e-4 | slr1568 | G0:0060089 | <1e-4 | slr6071  | G0:0044422 | <1e-4 | ssr6032 | G0:0003723 | 0.0672 |
| sl10167 | G0:0006220 | <1e-4 | slr0670 | G0:0050794 | <1e-4 | slr2070 | G0:0022892 | <1e-4 | slr1230  | G0:0044446 | <1e-4 | sl11414 | G0:0003723 | 0.0672 |
| slr1209 | G0:0044255 | <1e-4 | slr0731 | G0:0016052 | <1e-4 | sl11763 | G0:0015399 | <1e-4 | slr0262  | G0:0044425 | <1e-4 | sl11389 | G0:0003723 | 0.0672 |
| sl11769 | G0:0052188 | <1e-4 | slr8044 | G0:0009889 | <1e-4 | sl10447 | G0:0005342 | <1e-4 | slr0689  | G0:0044424 | <1e-4 | sl10930 | G0:0003723 | 0.0672 |
| slr2005 | G0:0051179 | <1e-4 | sl15063 | G0:0044281 | <1e-4 | slr0416 | G0:0022891 | <1e-4 | slr0890  | G0:0044422 | <1e-4 | sl10994 | G0:0003723 | 0.0672 |

|          |            |       |         |            |       |         |            |       |          |            |       |         |            |        |
|----------|------------|-------|---------|------------|-------|---------|------------|-------|----------|------------|-------|---------|------------|--------|
| slr1429  | GO:0043412 | <1e-4 | ssl3451 | GO:0043170 | <1e-4 | slr0358 | GO:0015267 | <1e-4 | slr7024  | GO:0044446 | <1e-4 | sl11109 | GO:0003723 | 0.0672 |
| slr0476  | GO:0046164 | <1e-4 | slr0575 | GO:0055082 | <1e-4 | slr0103 | GO:0015291 | <1e-4 | sl10071  | GO:0044464 | <1e-4 | slr7097 | GO:0003723 | 0.0672 |
| slr1082  | GO:0009394 | <1e-4 | slr0852 | GO:0051186 | <1e-4 | slr0913 | GO:0043167 | <1e-4 | sl17006  | GO:0044464 | <1e-4 | slr1576 | GO:0003723 | 0.0672 |
| sl10524  | GO:0009126 | <1e-4 | sl11265 | GO:0009057 | <1e-4 | sl10740 | GO:0015399 | <1e-4 | ssl1577  | GO:0044422 | <1e-4 | ssr6003 | GO:0003723 | 0.0672 |
| slr0590  | GO:0042180 | <1e-4 | slr0602 | GO:0046128 | <1e-4 | sl10172 | GO:0022891 | <1e-4 | sl15004  | GO:0044444 | <1e-4 | slr1187 | GO:0003723 | 0.0672 |
| sl11934  | GO:0046907 | <1e-4 | sl17066 | GO:0044248 | <1e-4 | sl11348 | GO:0022803 | <1e-4 | slr5077  | GO:0044444 | <1e-4 | slr5018 | GO:0003723 | 0.0672 |
| sl10609  | GO:0018130 | <1e-4 | sl10162 | GO:0071496 | <1e-4 | ssr1041 | GO:0042623 | <1e-4 | sl18032  | GO:0044424 | <1e-4 | sl10406 | GO:0003723 | 0.0672 |
| slr2144  | GO:0006576 | <1e-4 | sl10743 | GO:0008150 | <1e-4 | sl11531 | GO:0015291 | <1e-4 | slr0668  | GO:0044444 | <1e-4 | sl11773 | GO:0003723 | 0.0672 |
| sl10162  | GO:0034660 | <1e-4 | sl10069 | GO:0055114 | <1e-4 | slr6005 | GO:0022838 | <1e-4 | sl10832  | GO:0044444 | <1e-4 | sl11651 | GO:0003723 | 0.0672 |
| sl10710  | GO:0055082 | <1e-4 | sl10487 | GO:0006066 | <1e-4 | sl10563 | GO:0042623 | <1e-4 | slr7071  | GO:0043226 | <1e-4 | sl16054 | GO:0003723 | 0.0672 |
| slr0262  | GO:0009309 | <1e-4 | slr0852 | GO:0071842 | <1e-4 | slr0483 | GO:0015293 | <1e-4 | slr1568  | GO:0044424 | <1e-4 | slr1365 | GO:0003723 | 0.0672 |
| sl11455  | GO:0009161 | <1e-4 | slr0730 | GO:0034654 | <1e-4 | ssr2142 | GO:0015291 | <1e-4 | slr0723  | GO:0044422 | <1e-4 | slr0146 | GO:0003723 | 0.0672 |
| sl10737  | GO:0043412 | <1e-4 | slr1677 | GO:0006732 | <1e-4 | slr1624 | GO:0015291 | <1e-4 | sl10412  | GO:0044424 | <1e-4 | slr6049 | GO:0003723 | 0.0672 |
| sl11022  | GO:0042455 | <1e-4 | ssl2420 | GO:0006066 | <1e-4 | sl10861 | GO:0016788 | <1e-4 | slr0613  | GO:0044446 | <1e-4 | sl11273 | GO:0003723 | 0.0672 |
| slr1907  | GO:0009165 | <1e-4 | sl18012 | GO:0033013 | <1e-4 | slr1572 | GO:0043167 | <1e-4 | ssl3573  | GO:0044422 | <1e-4 | slr5119 | GO:0003723 | 0.0672 |
| ssr3122  | GO:0006163 | <1e-4 | slr1173 | GO:0016054 | <1e-4 | slr1513 | GO:0016746 | <1e-4 | slr1699  | GO:0044446 | <1e-4 | ssr1407 | GO:0003723 | 0.0672 |
| slr0269  | GO:0043170 | <1e-4 | slr0318 | GO:0006082 | <1e-4 | slr1338 | GO:0022891 | <1e-4 | slr1571  | GO:0043226 | <1e-4 | sl11757 | GO:0003723 | 0.0672 |
| sl11763  | GO:0051234 | <1e-4 | sl11995 | GO:0065007 | <1e-4 | slr0914 | GO:0022892 | <1e-4 | slr0680  | GO:0005575 | <1e-4 | slr0337 | GO:0003723 | 0.0672 |
| sl11531  | GO:0065007 | <1e-4 | slr1098 | GO:0019752 | <1e-4 | slr0505 | GO:0015291 | <1e-4 | slr0937  | GO:0044424 | <1e-4 | slr1270 | GO:0003723 | 0.0672 |
| sl11671  | GO:0033013 | <1e-4 | sl10867 | GO:0006220 | <1e-4 | slr7059 | GO:0015293 | <1e-4 | slr5126  | GO:0044464 | <1e-4 | slr1306 | GO:0003723 | 0.0672 |
| slr1407  | GO:0042451 | <1e-4 | sl12011 | GO:0031640 | <1e-4 | sl17090 | GO:0022891 | <1e-4 | sl11512  | GO:0005575 | <1e-4 | slr0196 | GO:0003723 | 0.0672 |
| sl11939  | GO:0009124 | <1e-4 | ssr8013 | GO:0071841 | <1e-4 | slr7098 | GO:0015267 | <1e-4 | slr1880  | GO:0005575 | <1e-4 | slr7012 | GO:0003723 | 0.0672 |
| sl10847  | GO:0016053 | <1e-4 | ssl7048 | GO:0022607 | <1e-4 | slr0489 | GO:0016817 | <1e-4 | sl11201  | GO:0044425 | <1e-4 | sl11797 | GO:0003723 | 0.0672 |
| slr1913  | GO:0043648 | <1e-4 | ssr7072 | GO:0031323 | <1e-4 | sl11956 | GO:0015293 | <1e-4 | slr0871  | GO:0005575 | <1e-4 | sl10423 | GO:0003723 | 0.0672 |
| slr0730  | GO:0051234 | <1e-4 | sl18035 | GO:0022607 | <1e-4 | sl11736 | GO:0022836 | <1e-4 | slr1177  | GO:0005575 | <1e-4 | sl11509 | GO:0003723 | 0.0672 |
| slr1676  | GO:0042180 | <1e-4 | sl11095 | GO:0048878 | <1e-4 | sl17062 | GO:0003674 | <1e-4 | sl10141  | GO:0005575 | <1e-4 | ssl2781 | GO:0003723 | 0.0672 |
| ssl6061  | GO:0072528 | <1e-4 | slr1885 | GO:0042180 | <1e-4 | sl10925 | GO:0015405 | <1e-4 | sl10008  | GO:0005575 | <1e-4 | sl10481 | GO:0003723 | 0.0672 |
| ssl2471  | GO:0065007 | <1e-4 | sl10296 | GO:0009394 | <1e-4 | slr2005 | GO:0022838 | <1e-4 | slr2003  | GO:0005575 | <1e-4 | sl11123 | GO:0003723 | 0.0672 |
| ssr7093  | GO:0009141 | <1e-4 | slr1940 | GO:0009259 | <1e-4 | ssl1520 | GO:0043492 | <1e-4 | slr0108  | GO:0043226 | <1e-4 | sl11485 | GO:0003723 | 0.0672 |
| slr2073  | GO:0043436 | <1e-4 | slr1338 | GO:0019222 | <1e-4 | sl10802 | GO:0016746 | <1e-4 | sl11289  | GO:0044446 | <1e-4 | slr0870 | GO:0003723 | 0.0672 |
| ssr2787  | GO:0044260 | <1e-4 | ssr0761 | GO:0018130 | <1e-4 | sm10011 | GO:0015267 | <1e-4 | sl17070  | GO:0044444 | <1e-4 | slr0964 | GO:0003723 | 0.0672 |
| sl10360  | GO:0071842 | <1e-4 | slr0263 | GO:0031326 | <1e-4 | slr1875 | GO:0015293 | <1e-4 | sl11188  | GO:0044464 | <1e-4 | slr1920 | GO:0003723 | 0.0672 |
| ssl1792  | GO:0044003 | <1e-4 | sl11735 | GO:0009991 | <1e-4 | slr5037 | GO:0043492 | <1e-4 | slr0392  | GO:0005575 | <1e-4 | sl11696 | GO:0003723 | 0.0672 |
| ssl3451  | GO:0019222 | <1e-4 | slr1196 | GO:0034660 | <1e-4 | slr0065 | GO:0016462 | <1e-4 | slr0416  | GO:0005575 | <1e-4 | sl10008 | GO:0003723 | 0.0672 |
| slr1519  | GO:0048519 | <1e-4 | sl11570 | GO:0006066 | <1e-4 | ssr1499 | GO:0022838 | <1e-4 | ssr3300  | GO:0044422 | <1e-4 | sl10048 | GO:0003723 | 0.0672 |
| slr0243  | GO:0044260 | <1e-4 | slr5018 | GO:0072527 | <1e-4 | sl10044 | GO:0015399 | <1e-4 | slr1419  | GO:0044446 | <1e-4 | sl10886 | GO:0003723 | 0.0672 |
| slr1170  | GO:0008610 | <1e-4 | sl10857 | GO:0051186 | <1e-4 | sl17064 | GO:0015267 | <1e-4 | sl11675  | GO:0044422 | <1e-4 | sl17047 | GO:0003723 | 0.0672 |
| slr1342  | GO:0009259 | <1e-4 | slr0801 | GO:0016052 | <1e-4 | slr2121 | GO:0015293 | <1e-4 | slr1339  | GO:0044444 | <1e-4 | sl10284 | GO:0003723 | 0.0672 |
| sl10269  | GO:0044275 | <1e-4 | sl18035 | GO:0009308 | <1e-4 | slr0725 | GO:0022891 | <1e-4 | sl11477  | GO:0044446 | <1e-4 | sl11004 | GO:0003723 | 0.0672 |
| sl11950  | GO:0009308 | <1e-4 | sl11092 | GO:0022411 | <1e-4 | sl11388 | GO:0060089 | <1e-4 | slr7092  | GO:0005575 | <1e-4 | sl10293 | GO:0003723 | 0.0672 |
| sl10980  | GO:0006720 | <1e-4 | sl10645 | GO:0042451 | <1e-4 | sl11862 | GO:0016462 | <1e-4 | slr2032  | GO:0044446 | <1e-4 | slr1188 | GO:0003723 | 0.0672 |
| sl11106  | GO:0006220 | <1e-4 | sl11162 | GO:0034641 | <1e-4 | slr1174 | GO:0022857 | <1e-4 | sl10932  | GO:0044424 | <1e-4 | slr0601 | GO:0003723 | 0.0672 |
| sl10327  | GO:0019637 | <1e-4 | slr6063 | GO:0052111 | <1e-4 | sl11606 | GO:0003674 | <1e-4 | ssl17074 | GO:0044464 | <1e-4 | sl11022 | GO:0003723 | 0.0672 |
| slr1223  | GO:0006811 | <1e-4 | sl11109 | GO:0044255 | <1e-4 | ssl0739 | GO:0003674 | <1e-4 | sl10659  | GO:0044464 | <1e-4 | ssr3189 | GO:0003723 | 0.0672 |
| ssr6079  | GO:0046164 | <1e-4 | sl11738 | GO:0006091 | <1e-4 | slr0341 | GO:0016817 | <1e-4 | slr1365  | GO:0044464 | <1e-4 | sl11606 | GO:0003723 | 0.0672 |
| sl11401  | GO:0019222 | <1e-4 | sl10910 | GO:0006766 | <1e-4 | sl11954 | GO:0016746 | <1e-4 | sl10793  | GO:0044422 | <1e-4 | ssr1766 | GO:0003723 | 0.0672 |
| sl11764  | GO:0071841 | <1e-4 | sl11632 | GO:0080090 | <1e-4 | sl11390 | GO:0022832 | <1e-4 | slr7100  | GO:0044422 | <1e-4 | sl11921 | GO:0003723 | 0.0672 |
| slr1327  | GO:0006733 | <1e-4 | sl10156 | GO:0065007 | <1e-4 | ssl3142 | GO:0022803 | <1e-4 | sl11570  | GO:0044464 | <1e-4 | slr7016 | GO:0003723 | 0.0672 |
| ssl18039 | GO:0009260 | <1e-4 | slr1557 | GO:0009893 | <1e-4 | slr6067 | GO:0005342 | <1e-4 | sl15004  | GO:0043226 | <1e-4 | slr6006 | GO:0003723 | 0.0672 |
| sl11123  | GO:0009124 | <1e-4 | slr0358 | GO:0043648 | <1e-4 | ssr6089 | GO:0015293 | <1e-4 | sl10787  | GO:0044424 | <1e-4 | ssl0461 | GO:0003723 | 0.0672 |
| slr5013  | GO:0009124 | <1e-4 | sl11109 | GO:0009259 | <1e-4 | sl10827 | GO:0022857 | <1e-4 | sl10282  | GO:0044464 | <1e-4 | ssl2717 | GO:0003723 | 0.0672 |
| sl11773  | GO:0006720 | <1e-4 | slr1603 | GO:0043549 | <1e-4 | slr2052 | GO:0015293 | <1e-4 | sl11512  | GO:0044444 | <1e-4 | slr0971 | GO:0003723 | 0.0672 |
| slr0479  | GO:0009161 | <1e-4 | slr1964 | GO:0071840 | <1e-4 | sl11054 | GO:0015293 | <1e-4 | sl15026  | GO:0043226 | <1e-4 | slr1535 | GO:0003723 | 0.0672 |
| slr1875  | GO:0052188 | <1e-4 | slr1069 | GO:0050801 | <1e-4 | sl11348 | GO:0022892 | <1e-4 | slr1273  | GO:0044424 | <1e-4 | slr6080 | GO:0003723 | 0.0672 |

|         |            |       |         |            |       |         |            |       |         |            |       |         |            |        |
|---------|------------|-------|---------|------------|-------|---------|------------|-------|---------|------------|-------|---------|------------|--------|
| s111552 | G0:0065007 | <1e-4 | s110449 | G0:0043436 | <1e-4 | s1r0588 | G0:0016462 | <1e-4 | s117090 | G0:0043226 | <1e-4 | s1r1927 | G0:0003723 | 0.0672 |
| s1r0888 | G0:0019637 | <1e-4 | s111698 | G0:0016052 | <1e-4 | s1r0699 | G0:0016462 | <1e-4 | s110252 | G0:0044424 | <1e-4 | s111217 | G0:0003723 | 0.0672 |
| s110532 | G0:0034654 | <1e-4 | s1r0169 | G0:0009199 | <1e-4 | s1r1273 | G0:0022838 | <1e-4 | s1r0199 | G0:0044446 | <1e-4 | s1r0059 | G0:0003723 | 0.0672 |
| s111173 | G0:0019637 | <1e-4 | s1r0664 | G0:0009308 | <1e-4 | s111562 | G0:0022890 | <1e-4 | s1r0689 | G0:0044446 | <1e-4 | s110068 | G0:0017111 | 0.0665 |
| s1r6014 | G0:0001932 | <1e-4 | s110319 | G0:0009124 | <1e-4 | s1r1571 | G0:0008171 | <1e-4 | s1r1534 | G0:0043226 | <1e-4 | s1r1215 | G0:0017111 | 0.0665 |
| s111960 | G0:0051818 | <1e-4 | s1r1788 | G0:0065007 | <1e-4 | s1r1568 | G0:0022832 | <1e-4 | s111009 | G0:0044444 | <1e-4 | s110023 | G0:0003723 | 0.0657 |
| s1r2118 | G0:0010468 | <1e-4 | s1r7057 | G0:0019751 | <1e-4 | s1r0816 | G0:0022890 | <1e-4 | s110441 | G0:0044446 | <1e-4 | s110198 | G0:0003723 | 0.0657 |
| s111511 | G0:0016052 | <1e-4 | s1r2119 | G0:0044260 | <1e-4 | s1r0313 | G0:0015075 | <1e-4 | s1r6068 | G0:0044425 | <1e-4 | s110982 | G0:0003723 | 0.0657 |
| s1r0169 | G0:0044248 | <1e-4 | s111400 | G0:0019222 | <1e-4 | s1r1259 | G0:0022892 | <1e-4 | s1r0816 | G0:0044422 | <1e-4 | s110780 | G0:0003723 | 0.0657 |
| s110237 | G0:0051171 | <1e-4 | s1r0217 | G0:0018130 | <1e-4 | s111485 | G0:0003674 | <1e-4 | ss10352 | G0:0044425 | <1e-4 | s111006 | G0:0003723 | 0.0657 |
| ss11378 | G0:0072527 | <1e-4 | s110238 | G0:0051246 | <1e-4 | s110737 | G0:0016818 | <1e-4 | s1r1866 | G0:0005575 | <1e-4 | s110066 | G0:0003723 | 0.0657 |
| s111654 | G0:0051347 | <1e-4 | s111036 | G0:0052111 | <1e-4 | s1r1875 | G0:0022803 | <1e-4 | s110072 | G0:0005575 | <1e-4 | s1r2011 | G0:0003723 | 0.0657 |
| s1r1493 | G0:0071496 | <1e-4 | ss18039 | G0:0009259 | <1e-4 | s111898 | G0:0016817 | <1e-4 | s111006 | G0:0044464 | <1e-4 | s1r1676 | G0:0003723 | 0.0657 |
| ss10109 | G0:0010556 | <1e-4 | s111737 | G0:0043436 | <1e-4 | s1r7097 | G0:0015405 | <1e-4 | s1r1813 | G0:0044422 | <1e-4 | s1r2121 | G0:0003723 | 0.0657 |
| s1r1658 | G0:0071496 | <1e-4 | s111289 | G0:0050789 | <1e-4 | s111203 | G0:0016746 | <1e-4 | s1r1378 | G0:0005575 | <1e-4 | s1r1203 | G0:0003723 | 0.0657 |
| s1r1576 | G0:0006720 | <1e-4 | s1r1875 | G0:0051171 | <1e-4 | s111659 | G0:0015267 | <1e-4 | s1r0148 | G0:0044425 | <1e-4 | s1r0941 | G0:0003723 | 0.0657 |
| s111717 | G0:0043436 | <1e-4 | s111965 | G0:0043549 | <1e-4 | s1r0978 | G0:0016462 | <1e-4 | s111858 | G0:0005575 | <1e-4 | s111736 | G0:0003723 | 0.0657 |
| s111219 | G0:0009394 | <1e-4 | ss18003 | G0:0051171 | <1e-4 | s1r0664 | G0:0022892 | <1e-4 | s1r1052 | G0:0005575 | <1e-4 | s1r1618 | G0:0003723 | 0.0657 |
| s1r1142 | G0:0006082 | <1e-4 | s111021 | G0:0006163 | <1e-4 | s1r7012 | G0:0043492 | <1e-4 | ssr2317 | G0:0043226 | <1e-4 | s1r1913 | G0:0003723 | 0.0657 |
| ss11464 | G0:0051179 | <1e-4 | s110327 | G0:0051818 | <1e-4 | s1r0592 | G0:0016462 | <1e-4 | ssr6024 | G0:0044422 | <1e-4 | s111002 | G0:0003723 | 0.0657 |
| s1r7023 | G0:0009142 | <1e-4 | s1r0204 | G0:0048518 | <1e-4 | s1r2048 | G0:0016818 | <1e-4 | s110069 | G0:0044424 | <1e-4 | s111835 | G0:0003723 | 0.0657 |
| s1r8014 | G0:0051246 | <1e-4 | s1r1923 | G0:0051186 | <1e-4 | s1r1194 | G0:0015291 | <1e-4 | ss12065 | G0:0005575 | <1e-4 | s1r1210 | G0:0003723 | 0.0657 |
| s1r1900 | G0:0009394 | <1e-4 | s111954 | G0:0009893 | <1e-4 | ss10353 | G0:0022838 | <1e-4 | s110676 | G0:0044424 | <1e-4 | s1r1593 | G0:0003723 | 0.0657 |
| s1r1816 | G0:0006720 | <1e-4 | s1r0509 | G0:0051188 | <1e-4 | s1r0709 | G0:0042623 | <1e-4 | s1r0971 | G0:0043226 | <1e-4 | s1r1571 | G0:0003723 | 0.0657 |
| ssr5106 | G0:0008610 | <1e-4 | s110444 | G0:0050801 | <1e-4 | s1r1342 | G0:0022892 | <1e-4 | ss17051 | G0:0005575 | <1e-4 | ssr2551 | G0:0003723 | 0.0657 |
| s1r5087 | G0:0031326 | <1e-4 | s1r2032 | G0:0009165 | <1e-4 | s1r2032 | G0:0005342 | <1e-4 | s1r7060 | G0:0044425 | <1e-4 | s1r0103 | G0:0003723 | 0.0657 |
| s1r7057 | G0:0009141 | <1e-4 | ss15031 | G0:0052111 | <1e-4 | s111267 | G0:0016818 | <1e-4 | s110168 | G0:0044446 | <1e-4 | s1r1573 | G0:0003723 | 0.0657 |
| s1r0655 | G0:0051234 | <1e-4 | s110803 | G0:0043933 | <1e-4 | s1r2000 | G0:0043167 | <1e-4 | ssr1765 | G0:0044425 | <1e-4 | s1r0294 | G0:0003723 | 0.0657 |
| s110405 | G0:0051234 | <1e-4 | ss12749 | G0:0045184 | <1e-4 | s111068 | G0:0022890 | <1e-4 | s1r5118 | G0:0005575 | <1e-4 | s111954 | G0:0003723 | 0.0657 |
| ss11300 | G0:0043436 | <1e-4 | s110602 | G0:0072524 | <1e-4 | s111912 | G0:0022891 | <1e-4 | s1r5118 | G0:0044464 | <1e-4 | s110314 | G0:0003723 | 0.0657 |
| ss11004 | G0:0005996 | <1e-4 | s1r1081 | G0:0009991 | <1e-4 | s110811 | G0:0016741 | <1e-4 | ssr6086 | G0:0044424 | <1e-4 | s111830 | G0:0003723 | 0.0657 |
| s1r1944 | G0:0031323 | <1e-4 | s111381 | G0:0051246 | <1e-4 | s1r1471 | G0:0022803 | <1e-4 | s110236 | G0:0005575 | <1e-4 | s1r0921 | G0:0003723 | 0.0657 |
| s111289 | G0:0006082 | <1e-4 | s1r0654 | G0:0006066 | <1e-4 | ssr2067 | G0:0016818 | <1e-4 | s1r0195 | G0:0044446 | <1e-4 | s1r1275 | G0:0003723 | 0.0657 |
| s118032 | G0:0048518 | <1e-4 | s111201 | G0:0055082 | <1e-4 | ss12420 | G0:0022890 | <1e-4 | s111004 | G0:0044444 | <1e-4 | ssr2755 | G0:0003723 | 0.0657 |
| s111390 | G0:0051246 | <1e-4 | s110381 | G0:0051347 | <1e-4 | ssr2998 | G0:0016462 | <1e-4 | s1r5018 | G0:0044422 | <1e-4 | s111262 | G0:0003723 | 0.0657 |
| s111250 | G0:0043648 | <1e-4 | s1r7059 | G0:0009056 | <1e-4 | s1r1599 | G0:0016746 | <1e-4 | ss11972 | G0:0044444 | <1e-4 | s110010 | G0:0003723 | 0.0657 |
| s110994 | G0:0051171 | <1e-4 | s110230 | G0:0019751 | <1e-4 | s1r1266 | G0:0015267 | <1e-4 | s1r0872 | G0:0044425 | <1e-4 | s1r1266 | G0:0003723 | 0.0657 |
| s1r0780 | G0:0050794 | <1e-4 | s110691 | G0:0048523 | <1e-4 | ss18039 | G0:0022892 | <1e-4 | s110760 | G0:0044464 | <1e-4 | s1r0192 | G0:0003723 | 0.0657 |
| s1r1624 | G0:0006082 | <1e-4 | s1r0146 | G0:0009165 | <1e-4 | ssr6032 | G0:0005342 | <1e-4 | s1r1173 | G0:0043226 | <1e-4 | s111530 | G0:0003723 | 0.0657 |
| s1r0374 | G0:0065007 | <1e-4 | s1r0980 | G0:0046483 | <1e-4 | s117078 | G0:0022838 | <1e-4 | ss15031 | G0:0005575 | <1e-4 | s1r1230 | G0:0003723 | 0.0657 |
| s1r1413 | G0:0009059 | <1e-4 | s1r1657 | G0:0033013 | <1e-4 | s1r0587 | G0:0043492 | <1e-4 | s1r1815 | G0:0005575 | <1e-4 | s110669 | G0:0004871 | 0.0644 |
| s111071 | G0:0016054 | <1e-4 | s1r2004 | G0:0044248 | <1e-4 | s1r1895 | G0:0022838 | <1e-4 | s110658 | G0:0044425 | <1e-4 | s110810 | G0:0004871 | 0.0644 |
| s1r6029 | G0:0009987 | <1e-4 | s110793 | G0:0009132 | <1e-4 | s1r6075 | G0:0008171 | <1e-4 | s1r1827 | G0:0043226 | <1e-4 | s1r0053 | G0:0004871 | 0.0644 |
| s1r1926 | G0:0010468 | <1e-4 | s1r0157 | G0:0006766 | <1e-4 | s110062 | G0:0008171 | <1e-4 | s1r6031 | G0:0005575 | <1e-4 | s1r0975 | G0:0004871 | 0.0644 |
| s118007 | G0:0009117 | <1e-4 | s111979 | G0:0043412 | <1e-4 | s1r0208 | G0:0003674 | <1e-4 | s115047 | G0:0044425 | <1e-4 | s111654 | G0:0004871 | 0.0644 |
| s1r1397 | G0:0051186 | <1e-4 | s1r1670 | G0:0042451 | <1e-4 | s110864 | G0:0015405 | <1e-4 | s1r0294 | G0:0005575 | <1e-4 | s111240 | G0:0004871 | 0.0644 |
| s111289 | G0:0016054 | <1e-4 | s1r6022 | G0:0006732 | <1e-4 | s115006 | G0:0042623 | <1e-4 | s1r0519 | G0:0044425 | <1e-4 | s110740 | G0:0004871 | 0.0644 |
| sm10011 | G0:0071841 | <1e-4 | s110875 | G0:0006066 | <1e-4 | s1r1875 | G0:0022838 | <1e-4 | s1r0588 | G0:0044464 | <1e-4 | ssr2754 | G0:0004871 | 0.0644 |
| s110933 | G0:0009132 | <1e-4 | s1r1767 | G0:0019751 | <1e-4 | s111510 | G0:0015291 | <1e-4 | ssr5074 | G0:0005575 | <1e-4 | s111350 | G0:0004871 | 0.0644 |
| s111913 | G0:0034660 | <1e-4 | s1r0519 | G0:0055114 | <1e-4 | s111583 | G0:0015405 | <1e-4 | s1r1674 | G0:0044464 | <1e-4 | s1r0801 | G0:0004871 | 0.0644 |
| s116053 | G0:0009309 | <1e-4 | s1r1773 | G0:0048878 | <1e-4 | s1r1900 | G0:0022857 | <1e-4 | s110854 | G0:0044444 | <1e-4 | s1r1590 | G0:0004871 | 0.0644 |
| s110854 | G0:0072528 | <1e-4 | ssr6083 | G0:0008150 | <1e-4 | ss12996 | G0:0022890 | <1e-4 | s111061 | G0:0044422 | <1e-4 | ss13382 | G0:0004871 | 0.0644 |
| s110280 | G0:0080090 | <1e-4 | s1r0592 | G0:0009132 | <1e-4 | s1r1944 | G0:0015291 | <1e-4 | s110545 | G0:0005575 | <1e-4 | s110909 | G0:0004871 | 0.0644 |
| s110183 | G0:0009394 | <1e-4 | s111315 | G0:0090304 | <1e-4 | s111531 | G0:0005342 | <1e-4 | s1r0358 | G0:0044424 | <1e-4 | s1r1895 | G0:0004871 | 0.0644 |

|         |            |       |         |            |       |         |            |       |         |            |       |         |            |        |
|---------|------------|-------|---------|------------|-------|---------|------------|-------|---------|------------|-------|---------|------------|--------|
| slr1301 | G0:0006163 | <1e-4 | sl11853 | G0:0009263 | <1e-4 | slr2003 | G0:0042623 | <1e-4 | slr0380 | G0:0044464 | <1e-4 | slr1303 | G0:0004871 | 0.0644 |
| sl11218 | G0:0051186 | <1e-4 | ssr5120 | G0:0048518 | <1e-4 | slr0914 | G0:0008171 | <1e-4 | sl10933 | G0:0044446 | <1e-4 | slr2048 | G0:0004871 | 0.0644 |
| slr1624 | G0:0009987 | <1e-4 | slr1383 | G0:0009263 | <1e-4 | ss10312 | G0:0016462 | <1e-4 | ss18005 | G0:0005575 | <1e-4 | sl10981 | G0:0004871 | 0.0644 |
| sl10242 | G0:0009124 | <1e-4 | slr0625 | G0:0005996 | <1e-4 | slr1103 | G0:0015075 | <1e-4 | sl10756 | G0:0044464 | <1e-4 | slr1827 | G0:0004871 | 0.0644 |
| slr1107 | G0:0065007 | <1e-4 | sl10448 | G0:0006811 | <1e-4 | sl11232 | G0:0015291 | <1e-4 | sl17078 | G0:0044422 | <1e-4 | sl10412 | G0:0004871 | 0.0644 |
| sl10911 | G0:0051347 | <1e-4 | slr1240 | G0:0009161 | <1e-4 | sl10553 | G0:0060089 | <1e-4 | sl11752 | G0:0044444 | <1e-4 | sl10141 | G0:0004871 | 0.0644 |
| sl10871 | G0:0071840 | <1e-4 | sl10751 | G0:0055082 | <1e-4 | slr1681 | G0:0042623 | <1e-4 | slr1570 | G0:0044422 | <1e-4 | slr1082 | G0:0004871 | 0.0644 |
| slr1599 | G0:0009144 | <1e-4 | sl11240 | G0:0006811 | <1e-4 | slr0082 | G0:0022836 | <1e-4 | slr6021 | G0:0043226 | <1e-4 | sl11873 | G0:0004871 | 0.0644 |
| sl10263 | G0:0006066 | <1e-4 | slr1906 | G0:0019637 | <1e-4 | slr7060 | G0:0022857 | <1e-4 | slr0476 | G0:0044464 | <1e-4 | sl11372 | G0:0004871 | 0.0644 |
| slr0232 | G0:0009893 | <1e-4 | sl11009 | G0:0006720 | <1e-4 | sl11632 | G0:0016817 | <1e-4 | slr1907 | G0:0044424 | <1e-4 | slr0455 | G0:0004871 | 0.0644 |
| slr0453 | G0:0009123 | <1e-4 | ss17038 | G0:0080090 | <1e-4 | sl11570 | G0:0022836 | <1e-4 | sl10827 | G0:0044444 | <1e-4 | sl11634 | G0:0004871 | 0.0644 |
| slr1624 | G0:0046907 | <1e-4 | sl10487 | G0:0055114 | <1e-4 | sl10172 | G0:0022803 | <1e-4 | slr1702 | G0:0044444 | <1e-4 | slr1338 | G0:0004871 | 0.0644 |
| sl10410 | G0:0051818 | <1e-4 | sl10939 | G0:0018130 | <1e-4 | slr0730 | G0:0022803 | <1e-4 | sl10930 | G0:0043226 | <1e-4 | sl10837 | G0:0004871 | 0.0644 |
| ssr1256 | G0:0052111 | <1e-4 | slr6090 | G0:0009263 | <1e-4 | sl11040 | G0:0015075 | <1e-4 | slr1338 | G0:0044425 | <1e-4 | sl10843 | G0:0004871 | 0.0644 |
| slr0345 | G0:0051818 | <1e-4 | ss18028 | G0:0048878 | <1e-4 | slr1980 | G0:0022803 | <1e-4 | sl15004 | G0:0044425 | <1e-4 | slr0554 | G0:0004871 | 0.0644 |
| sl11350 | G0:0051716 | <1e-4 | slr2084 | G0:0046128 | <1e-4 | slr1956 | G0:0043167 | <1e-4 | slr0366 | G0:0005575 | <1e-4 | sl11071 | G0:0004871 | 0.0644 |
| slr7096 | G0:0042451 | <1e-4 | slr7094 | G0:0065007 | <1e-4 | slr0924 | G0:0016462 | <1e-4 | sl11239 | G0:0044422 | <1e-4 | sl11173 | G0:0004871 | 0.0644 |
| slr0103 | G0:0065007 | <1e-4 | slr0179 | G0:0031640 | <1e-4 | sl10174 | G0:0015405 | <1e-4 | slr1470 | G0:0044444 | <1e-4 | slr1668 | G0:0004871 | 0.0644 |
| sl11528 | G0:0044283 | <1e-4 | slr1415 | G0:0006733 | <1e-4 | slr0601 | G0:0060089 | <1e-4 | sl10565 | G0:0043226 | <1e-4 | sl11352 | G0:0004871 | 0.0644 |
| slr0907 | G0:0008150 | <1e-4 | ss17048 | G0:0044275 | <1e-4 | slr2071 | G0:0015075 | <1e-4 | sl16052 | G0:0005575 | <1e-4 | sl10614 | G0:0004871 | 0.0644 |
| sl10085 | G0:0019751 | <1e-4 | sl10933 | G0:0051186 | <1e-4 | slr0870 | G0:0022892 | <1e-4 | sl17062 | G0:0044444 | <1e-4 | slr1122 | G0:0004871 | 0.0644 |
| sl11318 | G0:0006720 | <1e-4 | sl11193 | G0:0044260 | <1e-4 | sl11486 | G0:0022890 | <1e-4 | slr0971 | G0:0044425 | <1e-4 | slr1383 | G0:0004871 | 0.0644 |
| slr0668 | G0:0006576 | <1e-4 | sl10565 | G0:0034654 | <1e-4 | slr0594 | G0:0042623 | <1e-4 | sl15067 | G0:0044422 | <1e-4 | sl10888 | G0:0004871 | 0.0644 |
| ssr2787 | G0:0006811 | <1e-4 | slr0109 | G0:0006082 | <1e-4 | sl18011 | G0:0043492 | <1e-4 | sl10419 | G0:0005575 | <1e-4 | sl10189 | G0:0004871 | 0.0644 |
| slr1493 | G0:0042180 | <1e-4 | sl10160 | G0:0006721 | <1e-4 | sl11681 | G0:0022892 | <1e-4 | sl17090 | G0:0044446 | <1e-4 | sl11541 | G0:0004871 | 0.0644 |
| slr1677 | G0:0009144 | <1e-4 | slr0771 | G0:0009987 | <1e-4 | ssr2551 | G0:0016746 | <1e-4 | sl11552 | G0:0044425 | <1e-4 | slr1762 | G0:0004871 | 0.0644 |
| slr1196 | G0:0009144 | <1e-4 | slr1571 | G0:0044281 | <1e-4 | slr0914 | G0:0015075 | <1e-4 | sl10101 | G0:0005575 | <1e-4 | slr2125 | G0:0004871 | 0.0644 |
| ss1046  | G0:0042451 | <1e-4 | slr1534 | G0:0009132 | <1e-4 | slr2038 | G0:0016818 | <1e-4 | ssr3129 | G0:0043226 | <1e-4 | slr0654 | G0:0004871 | 0.0644 |
| slr1863 | G0:0009889 | <1e-4 | slr0517 | G0:0046164 | <1e-4 | slr0810 | G0:0016741 | <1e-4 | sl11965 | G0:0044424 | <1e-4 | slr0935 | G0:0004871 | 0.0644 |
| sl10243 | G0:0044283 | <1e-4 | sl10405 | G0:0046394 | <1e-4 | slr0852 | G0:0003674 | <1e-4 | sl11882 | G0:0044464 | <1e-4 | slr0962 | G0:0004871 | 0.0644 |
| sl10545 | G0:0009263 | <1e-4 | slr1415 | G0:0031640 | <1e-4 | slr0013 | G0:0008171 | <1e-4 | sl10588 | G0:0005575 | <1e-4 | slr0468 | G0:0004871 | 0.0644 |
| ss12807 | G0:0051818 | <1e-4 | slr1032 | G0:0006732 | <1e-4 | slr0655 | G0:0022838 | <1e-4 | sl11902 | G0:0044424 | <1e-4 | sl11399 | G0:0004871 | 0.0644 |
| sl11797 | G0:0048518 | <1e-4 | slr2119 | G0:0006766 | <1e-4 | slr5087 | G0:0015291 | <1e-4 | sl11552 | G0:0005575 | <1e-4 | sl10473 | G0:0004871 | 0.0634 |
| sl11726 | G0:0043436 | <1e-4 | ss10410 | G0:0034660 | <1e-4 | ssr3300 | G0:0022832 | <1e-4 | slr0269 | G0:0044464 | <1e-4 | sl10553 | G0:0004871 | 0.0634 |
| ssr2781 | G0:0019752 | <1e-4 | ssr5074 | G0:0009059 | <1e-4 | ssr7036 | G0:0022836 | <1e-4 | slr1886 | G0:0044446 | <1e-4 | slr0960 | G0:0004871 | 0.0634 |
| sl10553 | G0:0009893 | <1e-4 | slr0863 | G0:0055114 | <1e-4 | slr1339 | G0:0015077 | <1e-4 | sl10280 | G0:0044424 | <1e-4 | sl12013 | G0:0004871 | 0.0634 |
| sl11542 | G0:0050801 | <1e-4 | slr1774 | G0:0046128 | <1e-4 | sl10608 | G0:0022891 | <1e-4 | ssr5121 | G0:0044444 | <1e-4 | sl11203 | G0:0004871 | 0.0634 |
| sl10888 | G0:0006733 | <1e-4 | slr1484 | G0:0065007 | <1e-4 | sl11132 | G0:0042623 | <1e-4 | slr0865 | G0:0044444 | <1e-4 | sl11921 | G0:0004871 | 0.0634 |
| slr1183 | G0:0071841 | <1e-4 | slr0975 | G0:0006733 | <1e-4 | sl10985 | G0:0016741 | <1e-4 | sl12013 | G0:0044424 | <1e-4 | sl11853 | G0:0004871 | 0.0634 |
| slr0872 | G0:0009262 | <1e-4 | slr1628 | G0:0044248 | <1e-4 | sl10405 | G0:0016746 | <1e-4 | slr0941 | G0:0044424 | <1e-4 | slr7092 | G0:0004871 | 0.0634 |
| sl10218 | G0:0009144 | <1e-4 | slr0554 | G0:0048878 | <1e-4 | slr1270 | G0:0005342 | <1e-4 | sl10736 | G0:0005575 | <1e-4 | ss15129 | G0:0004871 | 0.0634 |
| slr1647 | G0:0009124 | <1e-4 | sl10314 | G0:0045184 | <1e-4 | slr1571 | G0:0016746 | <1e-4 | slr0076 | G0:0044422 | <1e-4 | sl10241 | G0:0004871 | 0.0634 |
| ss15098 | G0:0006163 | <1e-4 | slr0751 | G0:0052188 | <1e-4 | slr0476 | G0:0016746 | <1e-4 | slr7100 | G0:0005575 | <1e-4 | ss12781 | G0:0004871 | 0.0634 |
| slr2018 | G0:0072527 | <1e-4 | slr1174 | G0:0048518 | <1e-4 | sl11399 | G0:0015077 | <1e-4 | sl10208 | G0:0044425 | <1e-4 | slr1907 | G0:0004871 | 0.0634 |
| slr1114 | G0:0006721 | <1e-4 | sl10069 | G0:0051234 | <1e-4 | sl10743 | G0:0015405 | <1e-4 | slr1338 | G0:0044444 | <1e-4 | sl18002 | G0:0004871 | 0.0634 |
| slr1690 | G0:0010468 | <1e-4 | slr1383 | G0:0046907 | <1e-4 | slr1668 | G0:0022838 | <1e-4 | ssr7035 | G0:0005575 | <1e-4 | slr1813 | G0:0004871 | 0.0634 |
| sl11109 | G0:0044275 | <1e-4 | sl15028 | G0:0071842 | <1e-4 | slr1932 | G0:0005342 | <1e-4 | slr1767 | G0:0005575 | <1e-4 | sl10609 | G0:0004871 | 0.0634 |
| sl11086 | G0:0008150 | <1e-4 | sl15067 | G0:0009144 | <1e-4 | sl10933 | G0:0022857 | <1e-4 | ss17046 | G0:0044424 | <1e-4 | sl10710 | G0:0004871 | 0.0634 |
| sl11531 | G0:0043648 | <1e-4 | slr0243 | G0:0016054 | <1e-4 | slr6073 | G0:0022891 | <1e-4 | slr5037 | G0:0005575 | <1e-4 | slr0440 | G0:0004871 | 0.0634 |
| sl11106 | G0:0009308 | <1e-4 | slr6021 | G0:0019362 | <1e-4 | slr7015 | G0:0005342 | <1e-4 | slr7081 | G0:0044422 | <1e-4 | slr7082 | G0:0004871 | 0.0634 |
| sl18035 | G0:0016054 | <1e-4 | ss13382 | G0:0006732 | <1e-4 | sl11495 | G0:0016818 | <1e-4 | slr1419 | G0:0005575 | <1e-4 | slr7025 | G0:0004871 | 0.0634 |
| slr7011 | G0:0055086 | <1e-4 | slr6100 | G0:0006753 | <1e-4 | slr1530 | G0:0022892 | <1e-4 | sl10685 | G0:0005575 | <1e-4 | ssr5117 | G0:0004871 | 0.0634 |
| slr6090 | G0:0051234 | <1e-4 | sl10756 | G0:0006811 | <1e-4 | sl10266 | G0:0015291 | <1e-4 | sl10525 | G0:0044425 | <1e-4 | sl15034 | G0:0004871 | 0.0634 |
| sl11714 | G0:0071842 | <1e-4 | slr0380 | G0:0009260 | <1e-4 | slr0594 | G0:0022891 | <1e-4 | sl11500 | G0:0005575 | <1e-4 | slr1657 | G0:0004871 | 0.0634 |



|         |            |       |         |            |       |         |            |       |         |            |       |         |            |        |
|---------|------------|-------|---------|------------|-------|---------|------------|-------|---------|------------|-------|---------|------------|--------|
| slr6104 | G0:0044260 | <1e-4 | slr1103 | G0:0044255 | <1e-4 | slr0871 | G0:0042623 | <1e-4 | slr1840 | G0:0043226 | <1e-4 | slr0552 | G0:0004871 | 0.0634 |
| slr6051 | G0:0044003 | <1e-4 | sl10647 | G0:0043412 | <1e-4 | sl10372 | G0:0016462 | <1e-4 | sl11350 | G0:0005575 | <1e-4 | slr0146 | G0:0004871 | 0.0634 |
| ssr2317 | G0:0071554 | <1e-4 | slr1045 | G0:0009308 | <1e-4 | slr2060 | G0:0015291 | <1e-4 | slr0725 | G0:0044425 | <1e-4 | sl10811 | G0:0004871 | 0.0634 |
| sl11461 | G0:0052188 | <1e-4 | slr1591 | G0:0009893 | <1e-4 | ssr1951 | G0:0016818 | <1e-4 | slr1852 | G0:0005575 | <1e-4 | slr1677 | G0:0004871 | 0.0634 |
| slr0699 | G0:0006721 | <1e-4 | slr0217 | G0:0006721 | <1e-4 | ssr2201 | G0:0022890 | <1e-4 | slr1303 | G0:0043226 | <1e-4 | sl18007 | G0:0004871 | 0.0634 |
| slr1944 | G0:0009259 | <1e-4 | ssr0761 | G0:0005996 | <1e-4 | slr1210 | G0:0022838 | <1e-4 | slr6106 | G0:0044424 | <1e-4 | slr1568 | G0:0004871 | 0.0634 |
| sl10788 | G0:0050896 | <1e-4 | slr7026 | G0:0042455 | <1e-4 | sl15004 | G0:0015291 | <1e-4 | slr6072 | G0:0044422 | <1e-4 | sl11163 | G0:0004871 | 0.0634 |
| slr1935 | G0:0033013 | <1e-4 | sl10910 | G0:0043648 | <1e-4 | sl10063 | G0:0022832 | <1e-4 | slr1187 | G0:0044422 | <1e-4 | sl10867 | G0:0004871 | 0.0634 |
| slr1087 | G0:0006793 | <1e-4 | slr1862 | G0:0044282 | <1e-4 | slr2117 | G0:0005342 | <1e-4 | slr0516 | G0:0044422 | <1e-4 | ss10312 | G0:0004871 | 0.0634 |
| slr1290 | G0:0034660 | <1e-4 | slr0596 | G0:0044106 | <1e-4 | slr1636 | G0:0022832 | <1e-4 | slr7102 | G0:0044444 | <1e-4 | ss11464 | G0:0004871 | 0.0634 |
| ss17074 | G0:0044283 | <1e-4 | slr1913 | G0:0051246 | <1e-4 | sl11063 | G0:0043492 | <1e-4 | sl11401 | G0:0044444 | <1e-4 | ssr6079 | G0:0004871 | 0.0634 |
| sl11960 | G0:0006091 | <1e-4 | ssr1698 | G0:0009260 | <1e-4 | slr1474 | G0:0015075 | <1e-4 | slr0373 | G0:0044444 | <1e-4 | ss11972 | G0:0004871 | 0.0634 |
| sl10847 | G0:0006576 | <1e-4 | slr0503 | G0:0046164 | <1e-4 | sl10069 | G0:0022832 | <1e-4 | slr1035 | G0:0005575 | <1e-4 | slr6074 | G0:0004871 | 0.0634 |
| sl11485 | G0:0010468 | <1e-4 | slr0195 | G0:0006091 | <1e-4 | sl10532 | G0:0022890 | <1e-4 | sl10898 | G0:0044446 | <1e-4 | slr1306 | G0:0004871 | 0.0634 |
| slr2060 | G0:0055086 | <1e-4 | sl11321 | G0:0046907 | <1e-4 | ss10352 | G0:0016817 | <1e-4 | ss10483 | G0:0044444 | <1e-4 | ss15095 | G0:0004871 | 0.0634 |
| slr6022 | G0:0052188 | <1e-4 | ssr2553 | G0:0009117 | <1e-4 | slr0217 | G0:0060089 | <1e-4 | ss15091 | G0:0044446 | <1e-4 | ss13383 | G0:0004871 | 0.0634 |
| slr1647 | G0:0055086 | <1e-4 | sl15028 | G0:0019219 | <1e-4 | ssr3304 | G0:0005342 | <1e-4 | ssr2912 | G0:0044424 | <1e-4 | slr1365 | G0:0004871 | 0.0634 |
| sl10198 | G0:0031326 | <1e-4 | sl10630 | G0:0006732 | <1e-4 | sl10670 | G0:0022838 | <1e-4 | sl10661 | G0:0044444 | <1e-4 | slr0362 | G0:0004871 | 0.0634 |
| sl10069 | G0:0031640 | <1e-4 | slr1275 | G0:0009308 | <1e-4 | slr1287 | G0:0022803 | <1e-4 | ssr6003 | G0:0044446 | <1e-4 | slr1263 | G0:0004871 | 0.0634 |
| sl11956 | G0:0009117 | <1e-4 | ss11520 | G0:0072522 | <1e-4 | sl11528 | G0:0008171 | <1e-4 | ssr6062 | G0:0044422 | <1e-4 | ssr5020 | G0:0004871 | 0.0634 |
| slr0887 | G0:0009141 | <1e-4 | slr0948 | G0:0046483 | <1e-4 | ss10242 | G0:0060089 | <1e-4 | slr1999 | G0:0044422 | <1e-4 | sl11757 | G0:0004871 | 0.0634 |
| sl10281 | G0:0006811 | <1e-4 | sl11505 | G0:0009991 | <1e-4 | sl10839 | G0:0016817 | <1e-4 | ssr3122 | G0:0044444 | <1e-4 | ssr2317 | G0:0004871 | 0.0634 |
| slr7058 | G0:0043412 | <1e-4 | sl11785 | G0:0009987 | <1e-4 | slr7073 | G0:0022892 | <1e-4 | sl11640 | G0:0043226 | <1e-4 | slr0168 | G0:0004871 | 0.0634 |
| sl10496 | G0:0009123 | <1e-4 | slr0924 | G0:0006811 | <1e-4 | slr6039 | G0:0043492 | <1e-4 | slr1773 | G0:0043226 | <1e-4 | slr6006 | G0:0004871 | 0.0634 |
| sl10860 | G0:0050789 | <1e-4 | sl10661 | G0:0006091 | <1e-4 | sl11063 | G0:0022890 | <1e-4 | sl11321 | G0:0044424 | <1e-4 | ssr2611 | G0:0004871 | 0.0634 |
| sl10765 | G0:0043170 | <1e-4 | sl17086 | G0:0019752 | <1e-4 | slr6100 | G0:0043492 | <1e-4 | sl10031 | G0:0044446 | <1e-4 | slr0890 | G0:0004871 | 0.0634 |
| sl11912 | G0:0009142 | <1e-4 | sl15034 | G0:0055086 | <1e-4 | sl10293 | G0:0022892 | <1e-4 | sl11526 | G0:0044424 | <1e-4 | slr0145 | G0:0004871 | 0.0634 |
| sl10047 | G0:0072524 | <1e-4 | slr0650 | G0:0046164 | <1e-4 | slr1627 | G0:0016462 | <1e-4 | slr1413 | G0:0044464 | <1e-4 | sl12015 | G0:0004871 | 0.0634 |
| sl15034 | G0:0051171 | <1e-4 | slr1788 | G0:0048518 | <1e-4 | sl10149 | G0:0046873 | <1e-4 | sl10376 | G0:0005575 | <1e-4 | slr0196 | G0:0004871 | 0.0634 |
| sl12011 | G0:0008150 | <1e-4 | slr0442 | G0:0072524 | <1e-4 | ssr6002 | G0:0015077 | <1e-4 | sl11632 | G0:0044422 | <1e-4 | sl11123 | G0:0004871 | 0.0634 |
| slr1215 | G0:0009263 | <1e-4 | sl11166 | G0:0046164 | <1e-4 | sl17077 | G0:0016462 | <1e-4 | sl10611 | G0:0043226 | <1e-4 | ss11498 | G0:0004871 | 0.0634 |
| sl10822 | G0:0052111 | <1e-4 | sl10149 | G0:0034654 | <1e-4 | sl10577 | G0:0043492 | <1e-4 | slr0031 | G0:0043226 | <1e-4 | sl10063 | G0:0004871 | 0.0634 |
| slr0865 | G0:0051188 | <1e-4 | sl10265 | G0:0009893 | <1e-4 | sl11613 | G0:0015399 | <1e-4 | sl10572 | G0:0044424 | <1e-4 | slr1721 | G0:0004871 | 0.0634 |
| slr0006 | G0:0042451 | <1e-4 | sl11950 | G0:0051716 | <1e-4 | sl11192 | G0:0043492 | <1e-4 | sl11132 | G0:0043226 | <1e-4 | ssr1407 | G0:0004871 | 0.0634 |
| sl11399 | G0:0006631 | <1e-4 | slr0656 | G0:0031323 | <1e-4 | sl11109 | G0:0042623 | <1e-4 | slr0356 | G0:0044446 | <1e-4 | sg10002 | G0:0004871 | 0.0634 |
| slr1338 | G0:0009263 | <1e-4 | sl11265 | G0:0016053 | <1e-4 | sl10861 | G0:0016462 | <1e-4 | slr0964 | G0:0044464 | <1e-4 | slr7080 | G0:0004871 | 0.0634 |
| sl10360 | G0:0009309 | <1e-4 | slr1616 | G0:0009123 | <1e-4 | sl10910 | G0:0022857 | <1e-4 | sl10162 | G0:0044464 | <1e-4 | slr1363 | G0:0004871 | 0.0634 |
| slr1241 | G0:0009259 | <1e-4 | ss10467 | G0:0031323 | <1e-4 | sl11201 | G0:0022857 | <1e-4 | sl11884 | G0:0044425 | <1e-4 | sl10397 | G0:0004871 | 0.0634 |
| slr0907 | G0:0009126 | <1e-4 | sl10160 | G0:0044283 | <1e-4 | ss13573 | G0:0015267 | <1e-4 | slr0921 | G0:0044446 | <1e-4 | slr0655 | G0:0004871 | 0.0634 |
| ss11300 | G0:0046164 | <1e-4 | slr1563 | G0:0052188 | <1e-4 | sl18033 | G0:0022803 | <1e-4 | slr1071 | G0:0044446 | <1e-4 | slr1547 | G0:0004871 | 0.0634 |
| sl11773 | G0:0051179 | <1e-4 | slr0192 | G0:0008150 | <1e-4 | slr0496 | G0:0015077 | <1e-4 | slr1168 | G0:0044424 | <1e-4 | slr2010 | G0:0004871 | 0.0634 |
| sl12011 | G0:0046164 | <1e-4 | slr0148 | G0:0006811 | <1e-4 | sl10980 | G0:0005342 | <1e-4 | sl10272 | G0:0044444 | <1e-4 | ss12420 | G0:0004871 | 0.0634 |
| slr1699 | G0:0006732 | <1e-4 | slr1911 | G0:0019362 | <1e-4 | ssr5092 | G0:0042623 | <1e-4 | slr0204 | G0:0044425 | <1e-4 | sl15006 | G0:0004871 | 0.0634 |
| slr0049 | G0:0044271 | <1e-4 | sl11306 | G0:0044248 | <1e-4 | ss17048 | G0:0043492 | <1e-4 | sl10602 | G0:0044444 | <1e-4 | ss12920 | G0:0004871 | 0.0634 |
| sl18027 | G0:0071841 | <1e-4 | sl10547 | G0:0018130 | <1e-4 | sl11656 | G0:0022857 | <1e-4 | ssr2333 | G0:0005575 | <1e-4 | slr0489 | G0:0004871 | 0.0634 |
| sl11954 | G0:0008610 | <1e-4 | sl11853 | G0:0071842 | <1e-4 | sl11921 | G0:0042623 | <1e-4 | sl17066 | G0:0005575 | <1e-4 | slr0751 | G0:0004871 | 0.0634 |
| sl11218 | G0:0010556 | <1e-4 | slr1944 | G0:0055086 | <1e-4 | slr0380 | G0:0043492 | <1e-4 | sl11241 | G0:0044446 | <1e-4 | sl17062 | G0:0004871 | 0.0634 |
| slr1495 | G0:0034641 | <1e-4 | slr1737 | G0:0018130 | <1e-4 | ssr0761 | G0:0022891 | <1e-4 | slr0145 | G0:0005575 | <1e-4 | sl17063 | G0:0004871 | 0.0634 |
| slr1599 | G0:0033013 | <1e-4 | ssr6085 | G0:0018130 | <1e-4 | slr0263 | G0:0042623 | <1e-4 | sl11638 | G0:0044424 | <1e-4 | slr1260 | G0:0004871 | 0.0634 |
| ss10353 | G0:0019219 | <1e-4 | sl11217 | G0:0009141 | <1e-4 | ss13383 | G0:0015405 | <1e-4 | sl10611 | G0:0044425 | <1e-4 | sl10423 | G0:0004871 | 0.0634 |
| sl10543 | G0:0033013 | <1e-4 | ssr1768 | G0:0019219 | <1e-4 | slr0326 | G0:0042623 | <1e-4 | sl15061 | G0:0043226 | <1e-4 | slr0092 | G0:0004871 | 0.0634 |
| ss15015 | G0:0051171 | <1e-4 | ssr7072 | G0:0044282 | <1e-4 | sl11006 | G0:0060089 | <1e-4 | slr0013 | G0:0044446 | <1e-4 | slr1069 | G0:0004871 | 0.0634 |
| slr1397 | G0:0009308 | <1e-4 | ssr2554 | G0:0065007 | <1e-4 | slr0655 | G0:0015077 | <1e-4 | sl15089 | G0:0044425 | <1e-4 | ss15045 | G0:0004871 | 0.0634 |
| ssr0335 | G0:0072522 | <1e-4 | slr0959 | G0:0046483 | <1e-4 | slr0957 | G0:0016817 | <1e-4 | slr7101 | G0:0044425 | <1e-4 | ss12009 | G0:0004871 | 0.0634 |

|         |            |       |         |            |       |         |            |       |         |            |       |         |            |        |
|---------|------------|-------|---------|------------|-------|---------|------------|-------|---------|------------|-------|---------|------------|--------|
| slr0941 | G0:0009161 | <1e-4 | slr6072 | G0:0071841 | <1e-4 | sl10198 | G0:0015267 | <1e-4 | slr1152 | G0:0044446 | <1e-4 | sl10048 | G0:0004871 | 0.0634 |
| sl10505 | G0:0009308 | <1e-4 | slr2071 | G0:0043933 | <1e-4 | slr5111 | G0:0022891 | <1e-4 | sl11472 | G0:0005575 | <1e-4 | sl11053 | G0:0004871 | 0.0634 |
| slr1276 | G0:0043436 | <1e-4 | slr1866 | G0:0022607 | <1e-4 | sl10867 | G0:0016746 | <1e-4 | ssl2245 | G0:0044446 | <1e-4 | sl11939 | G0:0004871 | 0.0634 |
| slr0144 | G0:0071842 | <1e-4 | sl18004 | G0:0008150 | <1e-4 | sl11036 | G0:0015293 | <1e-4 | slr0545 | G0:0044464 | <1e-4 | sl10102 | G0:0004871 | 0.0634 |
| slr2010 | G0:0019222 | <1e-4 | slr1073 | G0:0072522 | <1e-4 | sl10192 | G0:0016746 | <1e-4 | sl11586 | G0:0044424 | <1e-4 | ssr7072 | G0:0004871 | 0.0634 |
| ssr7093 | G0:0044275 | <1e-4 | slr0456 | G0:0048878 | <1e-4 | slr7023 | G0:0022857 | <1e-4 | sl17066 | G0:0044425 | <1e-4 | sl11773 | G0:0004871 | 0.0634 |
| sl10710 | G0:0006753 | <1e-4 | ssr6002 | G0:0006733 | <1e-4 | slr0199 | G0:0003674 | <1e-4 | slr2120 | G0:0043226 | <1e-4 | slr0784 | G0:0004871 | 0.0634 |
| slr1116 | G0:0046907 | <1e-4 | sl11766 | G0:0046164 | <1e-4 | ss10787 | G0:0015075 | <1e-4 | ssl2065 | G0:0044446 | <1e-4 | slr0398 | G0:0004871 | 0.0634 |
| ssr3467 | G0:0009150 | <1e-4 | sl11562 | G0:0055086 | <1e-4 | sl11250 | G0:0022891 | <1e-4 | slr1918 | G0:0044464 | <1e-4 | sl11765 | G0:0004871 | 0.0634 |
| sl10372 | G0:0044283 | <1e-4 | slr1612 | G0:0008150 | <1e-4 | slr1110 | G0:0016746 | <1e-4 | ssl0483 | G0:0044424 | <1e-4 | slr1566 | G0:0004871 | 0.0634 |
| slr1885 | G0:0009199 | <1e-4 | slr1576 | G0:0019752 | <1e-4 | sl10444 | G0:0022891 | <1e-4 | ssl5065 | G0:0044464 | <1e-4 | sl11401 | G0:0004871 | 0.0634 |
| ssl7022 | G0:0090304 | <1e-4 | sl10218 | G0:0009132 | <1e-4 | sl10997 | G0:0005342 | <1e-4 | slr0112 | G0:0044464 | <1e-4 | sl10930 | G0:0004871 | 0.0634 |
| slr1847 | G0:0065007 | <1e-4 | sl11424 | G0:0009308 | <1e-4 | slr1923 | G0:0043167 | <1e-4 | sl11562 | G0:0044425 | <1e-4 | sl11025 | G0:0004871 | 0.0634 |
| sl10225 | G0:0048519 | <1e-4 | slr1056 | G0:0009309 | <1e-4 | slr1152 | G0:0015293 | <1e-4 | slr0157 | G0:0044464 | <1e-4 | sl10448 | G0:0004871 | 0.0634 |
| sl10596 | G0:0006721 | <1e-4 | sl11773 | G0:0006163 | <1e-4 | ssr3122 | G0:0016817 | <1e-4 | sl10309 | G0:0005575 | <1e-4 | ssr2422 | G0:0004871 | 0.0634 |
| sl15090 | G0:0051171 | <1e-4 | slr0967 | G0:0009056 | <1e-4 | sl10263 | G0:0016462 | <1e-4 | slr0554 | G0:0044424 | <1e-4 | slr0619 | G0:0004871 | 0.0634 |
| slr1768 | G0:0072522 | <1e-4 | ssl5027 | G0:0019637 | <1e-4 | slr1032 | G0:0015293 | <1e-4 | sl10985 | G0:0044424 | <1e-4 | sl10658 | G0:0004871 | 0.0634 |
| sl10447 | G0:0043549 | <1e-4 | slr5021 | G0:0051716 | <1e-4 | slr1767 | G0:0003674 | <1e-4 | slr0667 | G0:0043226 | <1e-4 | slr6072 | G0:0004871 | 0.0634 |
| sl17089 | G0:0016053 | <1e-4 | sl10564 | G0:0018130 | <1e-4 | sl10658 | G0:0022803 | <1e-4 | ssr6099 | G0:0044424 | <1e-4 | slr1218 | G0:0004871 | 0.0634 |
| slr0404 | G0:0044282 | <1e-4 | sl10886 | G0:0043170 | <1e-4 | slr1053 | G0:0008171 | <1e-4 | slr1383 | G0:0044446 | <1e-4 | sl11232 | G0:0004871 | 0.0634 |
| slr0287 | G0:0009263 | <1e-4 | sl17069 | G0:0009309 | <1e-4 | sl12011 | G0:0016741 | <1e-4 | slr6081 | G0:0044425 | <1e-4 | sl11571 | G0:0004871 | 0.0634 |
| sl10853 | G0:0009260 | <1e-4 | ssl1577 | G0:0051347 | <1e-4 | slr0169 | G0:0043492 | <1e-4 | ssl5031 | G0:0044446 | <1e-4 | slr1384 | G0:0004871 | 0.0634 |
| slr1505 | G0:0072522 | <1e-4 | sl10428 | G0:0034654 | <1e-4 | sl10909 | G0:0015075 | <1e-4 | sl10822 | G0:0005575 | <1e-4 | ssr1499 | G0:0004871 | 0.0634 |
| sl15006 | G0:0009308 | <1e-4 | slr7083 | G0:0009123 | <1e-4 | ssr0109 | G0:0016817 | <1e-4 | sl10670 | G0:0005575 | <1e-4 | ssr0332 | G0:0004871 | 0.0634 |
| slr7071 | G0:0009263 | <1e-4 | slr1047 | G0:0019751 | <1e-4 | sl11240 | G0:0022891 | <1e-4 | slr0325 | G0:0044446 | <1e-4 | slr1362 | G0:0004871 | 0.0634 |
| slr6101 | G0:0060255 | <1e-4 | sl11764 | G0:0042180 | <1e-4 | ssr1375 | G0:0022890 | <1e-4 | slr5127 | G0:0044444 | <1e-4 | slr1270 | G0:0004871 | 0.0634 |
| ssr2998 | G0:0006576 | <1e-4 | sl11340 | G0:0090304 | <1e-4 | slr0655 | G0:0022890 | <1e-4 | slr0300 | G0:0044446 | <1e-4 | sl15046 | G0:0004871 | 0.0634 |
| sl11570 | G0:0048523 | <1e-4 | sl10985 | G0:0009123 | <1e-4 | slr1814 | G0:0022890 | <1e-4 | sl11675 | G0:0044444 | <1e-4 | slr1636 | G0:0009058 | 0.0628 |
| slr6039 | G0:0019752 | <1e-4 | slr1507 | G0:0009150 | <1e-4 | slr0709 | G0:0022892 | <1e-4 | sl17065 | G0:0005575 | <1e-4 | sl10413 | G0:0009058 | 0.0628 |
| sl11285 | G0:0046164 | <1e-4 | ssl3615 | G0:0051347 | <1e-4 | sl11495 | G0:0022803 | <1e-4 | slr0192 | G0:0043226 | <1e-4 | slr1471 | G0:0005215 | 0.0626 |
| slr1287 | G0:0043170 | <1e-4 | slr0728 | G0:0080090 | <1e-4 | slr0728 | G0:0016818 | <1e-4 | slr0642 | G0:0005575 | <1e-4 | ssr2553 | G0:0003676 | 0.0623 |
| slr1415 | G0:0009893 | <1e-4 | sl10864 | G0:0009893 | <1e-4 | sl11414 | G0:0022836 | <1e-4 | sl10296 | G0:0044424 | <1e-4 | sl10376 | G0:0003676 | 0.0623 |
| sl10157 | G0:0071496 | <1e-4 | slr0863 | G0:0006720 | <1e-4 | sl10216 | G0:0060089 | <1e-4 | sl11173 | G0:0044424 | <1e-4 | sl10565 | G0:0003676 | 0.0623 |
| sl10445 | G0:0051179 | <1e-4 | sl12015 | G0:0044282 | <1e-4 | slr0962 | G0:0060089 | <1e-4 | slr0751 | G0:0005575 | <1e-4 | slr0967 | G0:0003676 | 0.0623 |
| ssr3467 | G0:0044271 | <1e-4 | sl11939 | G0:0042455 | <1e-4 | sl11247 | G0:0043492 | <1e-4 | slr1183 | G0:0043226 | <1e-4 | slr1970 | G0:0003676 | 0.0623 |
| sl10096 | G0:0009126 | <1e-4 | sl10456 | G0:0009141 | <1e-4 | ssl0832 | G0:0060089 | <1e-4 | slr2115 | G0:0044444 | <1e-4 | sl11052 | G0:0003676 | 0.0623 |
| slr0179 | G0:0009892 | <1e-4 | sl11072 | G0:0044283 | <1e-4 | slr0358 | G0:0022838 | <1e-4 | sl11898 | G0:0044425 | <1e-4 | sl18019 | G0:0003676 | 0.0623 |
| sl11954 | G0:0009394 | <1e-4 | sl10611 | G0:0072524 | <1e-4 | sl11783 | G0:0016817 | <1e-4 | slr0341 | G0:0005575 | <1e-4 | slr0667 | G0:0003676 | 0.0623 |
| slr0269 | G0:0044003 | <1e-4 | slr1900 | G0:0009123 | <1e-4 | slr0217 | G0:0022803 | <1e-4 | slr1863 | G0:0044464 | <1e-4 | slr6087 | G0:0003676 | 0.0623 |
| sl10615 | G0:0050896 | <1e-4 | sl10301 | G0:0009893 | <1e-4 | slr6009 | G0:0022892 | <1e-4 | slr0006 | G0:0044422 | <1e-4 | sl11583 | G0:0003676 | 0.0623 |
| ssr7072 | G0:0043648 | <1e-4 | ssr3129 | G0:0009892 | <1e-4 | sl10243 | G0:0016741 | <1e-4 | slr0813 | G0:0005575 | <1e-4 | ssr6086 | G0:0003676 | 0.0623 |
| slr1885 | G0:0019637 | <1e-4 | slr0442 | G0:0072528 | <1e-4 | ssl1004 | G0:0043492 | <1e-4 | slr5119 | G0:0043226 | <1e-4 | ssl3573 | G0:0003676 | 0.0623 |
| slr1570 | G0:0055114 | <1e-4 | sl10532 | G0:0050789 | <1e-4 | ssr1558 | G0:0022857 | <1e-4 | sl11004 | G0:0005575 | <1e-4 | slr2103 | G0:0003676 | 0.0623 |
| slr6103 | G0:0016052 | <1e-4 | slr5053 | G0:0043170 | <1e-4 | slr1103 | G0:0015399 | <1e-4 | slr2027 | G0:0005575 | <1e-4 | slr6106 | G0:0003676 | 0.0623 |
| sl10787 | G0:0055114 | <1e-4 | slr2012 | G0:0065007 | <1e-4 | slr0208 | G0:0016741 | <1e-4 | slr1178 | G0:0044464 | <1e-4 | slr1449 | G0:0003676 | 0.0623 |
| sl17089 | G0:0080090 | <1e-4 | sl11583 | G0:0042451 | <1e-4 | slr0869 | G0:0060089 | <1e-4 | sl10737 | G0:0044422 | <1e-4 | slr0780 | G0:0003676 | 0.0623 |
| slr2080 | G0:0044260 | <1e-4 | ssr2422 | G0:0006631 | <1e-4 | slr0712 | G0:0003674 | <1e-4 | slr0509 | G0:0044422 | <1e-4 | slr1951 | G0:0003676 | 0.0623 |
| slr7015 | G0:0019222 | <1e-4 | sl11267 | G0:0008150 | <1e-4 | slr0360 | G0:0043167 | <1e-4 | slr1152 | G0:0044422 | <1e-4 | sl11307 | G0:0003676 | 0.0623 |
| slr1721 | G0:0006631 | <1e-4 | ssl0832 | G0:0051716 | <1e-4 | slr0249 | G0:0042623 | <1e-4 | sl11606 | G0:0005575 | <1e-4 | ssr1041 | G0:0003676 | 0.0623 |
| slr7098 | G0:0019751 | <1e-4 | ssl5064 | G0:0048523 | <1e-4 | ssr3341 | G0:0015399 | <1e-4 | slr0341 | G0:0044446 | <1e-4 | ssr3129 | G0:0003676 | 0.0623 |
| slr1073 | G0:0009308 | <1e-4 | sl10595 | G0:0019752 | <1e-4 | slr1809 | G0:0022836 | <1e-4 | slr1189 | G0:0005575 | <1e-4 | sl11095 | G0:0003676 | 0.0623 |
| ssl0350 | G0:0048523 | <1e-4 | ssl0832 | G0:0016053 | <1e-4 | sl10839 | G0:0016741 | <1e-4 | sl11381 | G0:0043226 | <1e-4 | slr5102 | G0:0003676 | 0.0623 |
| sl18011 | G0:0048518 | <1e-4 | sl11660 | G0:0009141 | <1e-4 | slr1789 | G0:0005342 | <1e-4 | sl10872 | G0:0044425 | <1e-4 | sl17069 | G0:0003676 | 0.0623 |
| slr1699 | G0:0008610 | <1e-4 | sl11106 | G0:0009889 | <1e-4 | slr0341 | G0:0022836 | <1e-4 | sl10394 | G0:0005575 | <1e-4 | ssr3572 | G0:0003676 | 0.0623 |

|         |            |       |         |            |       |         |            |       |         |            |       |         |            |        |
|---------|------------|-------|---------|------------|-------|---------|------------|-------|---------|------------|-------|---------|------------|--------|
| ss15113 | G0:0009893 | <1e-4 | sl10157 | G0:0044248 | <1e-4 | sl11726 | G0:0022836 | <1e-4 | slr6016 | G0:0044446 | <1e-4 | sl11486 | G0:0003676 | 0.0623 |
| slr0723 | G0:0019751 | <1e-4 | sl11730 | G0:0043549 | <1e-4 | ssr6089 | G0:0022890 | <1e-4 | slr0765 | G0:0043226 | <1e-4 | slr1628 | G0:0003676 | 0.0623 |
| sgl0002 | G0:0050789 | <1e-4 | sl10737 | G0:0009161 | <1e-4 | sl10185 | G0:0015293 | <1e-4 | sl10615 | G0:0044425 | <1e-4 | slr1780 | G0:0003676 | 0.0623 |
| slr6103 | G0:0010468 | <1e-4 | sl11469 | G0:0031326 | <1e-4 | slr1571 | G0:0022836 | <1e-4 | sl11053 | G0:0044425 | <1e-4 | ss15015 | G0:0003676 | 0.0623 |
| slr2027 | G0:0009150 | <1e-4 | sl11692 | G0:0009142 | <1e-4 | slr1188 | G0:0015075 | <1e-4 | slr2037 | G0:0044464 | <1e-4 | slr5012 | G0:0003676 | 0.0623 |
| slr1951 | G0:0008150 | <1e-4 | slr5127 | G0:0006082 | <1e-4 | ssr7035 | G0:0016462 | <1e-4 | sl11340 | G0:0043226 | <1e-4 | ssr6078 | G0:0003676 | 0.0623 |
| slr0909 | G0:0065007 | <1e-4 | slr1071 | G0:0019222 | <1e-4 | slr0305 | G0:0060089 | <1e-4 | sl11940 | G0:0044444 | <1e-4 | sl11652 | G0:0003676 | 0.0623 |
| sl11638 | G0:0048878 | <1e-4 | sl11241 | G0:0006720 | <1e-4 | sl11155 | G0:0022890 | <1e-4 | slr1854 | G0:0005575 | <1e-4 | slr0109 | G0:0003676 | 0.0623 |
| slr5077 | G0:0009394 | <1e-4 | sl10913 | G0:0044275 | <1e-4 | ssr3571 | G0:0022892 | <1e-4 | slr0592 | G0:0005575 | <1e-4 | sl11926 | G0:0003676 | 0.0623 |
| slr0108 | G0:0009308 | <1e-4 | sl11173 | G0:0019222 | <1e-4 | slr1648 | G0:0043492 | <1e-4 | sl10933 | G0:0005575 | <1e-4 | sl17070 | G0:0003676 | 0.0623 |
| sl10981 | G0:0022411 | <1e-4 | slr0482 | G0:0050801 | <1e-4 | sl15046 | G0:0015293 | <1e-4 | sl10732 | G0:0005575 | <1e-4 | slr0610 | G0:0003676 | 0.0623 |
| slr0456 | G0:0009126 | <1e-4 | sl10553 | G0:0051716 | <1e-4 | sl11203 | G0:0022857 | <1e-4 | slr1441 | G0:0044424 | <1e-4 | slr0914 | G0:0003676 | 0.0623 |
| sl11504 | G0:0042451 | <1e-4 | slr1534 | G0:0044260 | <1e-4 | ss10109 | G0:0016817 | <1e-4 | slr1918 | G0:0044424 | <1e-4 | ss18028 | G0:0003676 | 0.0623 |
| slr0304 | G0:0051186 | <1e-4 | slr6015 | G0:0009142 | <1e-4 | slr0971 | G0:0015291 | <1e-4 | slr1855 | G0:0044446 | <1e-4 | slr1807 | G0:0003676 | 0.0623 |
| slr1168 | G0:0046483 | <1e-4 | slr1442 | G0:0006091 | <1e-4 | ssr3572 | G0:0015405 | <1e-4 | slr0169 | G0:0044425 | <1e-4 | sl11882 | G0:0003676 | 0.0623 |
| ssr1473 | G0:0034654 | <1e-4 | sl11726 | G0:0010556 | <1e-4 | slr1721 | G0:0015405 | <1e-4 | slr1778 | G0:0044425 | <1e-4 | sl17031 | G0:0003676 | 0.0623 |
| slr1915 | G0:0006576 | <1e-4 | slr0610 | G0:0031323 | <1e-4 | sl10372 | G0:0060089 | <1e-4 | slr1507 | G0:0043226 | <1e-4 | ssr1558 | G0:0003676 | 0.0623 |
| slr0871 | G0:0008610 | <1e-4 | sl10481 | G0:0046483 | <1e-4 | slr1070 | G0:0015405 | <1e-4 | slr2125 | G0:0044446 | <1e-4 | ssr0109 | G0:0003676 | 0.0623 |
| slr0270 | G0:0072522 | <1e-4 | ssr1391 | G0:0043436 | <1e-4 | slr1363 | G0:0015077 | <1e-4 | slr1737 | G0:0044464 | <1e-4 | slr0816 | G0:0003676 | 0.0623 |
| slr0380 | G0:0009259 | <1e-4 | slr2103 | G0:0042455 | <1e-4 | slr6031 | G0:0022803 | <1e-4 | sl11912 | G0:0005575 | <1e-4 | slr0670 | G0:0003676 | 0.0623 |
| slr6006 | G0:0009892 | <1e-4 | sl10933 | G0:0006732 | <1e-4 | slr0545 | G0:0022836 | <1e-4 | sl11671 | G0:0044424 | <1e-4 | ssr5074 | G0:0003676 | 0.0623 |
| sl10532 | G0:0009059 | <1e-4 | sl10241 | G0:0051179 | <1e-4 | slr0845 | G0:0043167 | <1e-4 | slr0023 | G0:0044446 | <1e-4 | slr1624 | G0:0003676 | 0.0623 |
| sgl0002 | G0:0034654 | <1e-4 | slr0179 | G0:0071841 | <1e-4 | slr0360 | G0:0016462 | <1e-4 | slr0765 | G0:0044464 | <1e-4 | sl10160 | G0:0003676 | 0.0623 |
| slr6021 | G0:0072527 | <1e-4 | ss18008 | G0:0009141 | <1e-4 | sl11509 | G0:0022857 | <1e-4 | ssr6086 | G0:0044422 | <1e-4 | sl11692 | G0:0003676 | 0.0623 |
| slr0598 | G0:0045184 | <1e-4 | ss10788 | G0:0019222 | <1e-4 | sl10249 | G0:0043167 | <1e-4 | slr2046 | G0:0044424 | <1e-4 | slr2117 | G0:0003676 | 0.0623 |
| ssr1499 | G0:0034654 | <1e-4 | slr0149 | G0:0044255 | <1e-4 | slr0398 | G0:0015267 | <1e-4 | slr0039 | G0:0044444 | <1e-4 | ssr2047 | G0:0003676 | 0.0623 |
| slr1223 | G0:0009308 | <1e-4 | slr1495 | G0:0006576 | <1e-4 | sl10710 | G0:0003674 | <1e-4 | sl10590 | G0:0044444 | <1e-4 | sl10062 | G0:0003676 | 0.0623 |
| slr0334 | G0:0009893 | <1e-4 | slr1162 | G0:0006733 | <1e-4 | sl10702 | G0:0016818 | <1e-4 | slr6008 | G0:0043226 | <1e-4 | sl10939 | G0:0003676 | 0.0623 |
| ss11263 | G0:0071554 | <1e-4 | slr2092 | G0:0080090 | <1e-4 | ssr5020 | G0:0015267 | <1e-4 | sl11315 | G0:0044464 | <1e-4 | slr0516 | G0:0003676 | 0.0623 |
| ss13291 | G0:0009394 | <1e-4 | sl16055 | G0:0006811 | <1e-4 | slr1852 | G0:0022892 | <1e-4 | ssr0692 | G0:0005575 | <1e-4 | sl11254 | G0:0003676 | 0.0623 |
| ssr6003 | G0:0019362 | <1e-4 | slr1568 | G0:0009260 | <1e-4 | ss12595 | G0:0015075 | <1e-4 | sl11511 | G0:0044444 | <1e-4 | slr1623 | G0:0003676 | 0.0623 |
| slr0263 | G0:0006721 | <1e-4 | slr5023 | G0:0009309 | <1e-4 | ssr1256 | G0:0005342 | <1e-4 | sl10702 | G0:0005575 | <1e-4 | sl18040 | G0:0003676 | 0.0623 |
| sl10871 | G0:0048518 | <1e-4 | slr0575 | G0:0019222 | <1e-4 | sl11304 | G0:0015077 | <1e-4 | sl10473 | G0:0044425 | <1e-4 | sl11171 | G0:0003676 | 0.0623 |
| slr1143 | G0:0006163 | <1e-4 | slr5119 | G0:0008150 | <1e-4 | slr0642 | G0:0016817 | <1e-4 | sl10553 | G0:0005575 | <1e-4 | ssr5011 | G0:0003676 | 0.0623 |
| slr7083 | G0:0044282 | <1e-4 | slr0818 | G0:0006082 | <1e-4 | sl11586 | G0:0016462 | <1e-4 | slr0579 | G0:0044446 | <1e-4 | slr1206 | G0:0003676 | 0.0623 |
| sl11401 | G0:0006721 | <1e-4 | sl10985 | G0:0009132 | <1e-4 | sl10487 | G0:0022891 | <1e-4 | sl10162 | G0:0043226 | <1e-4 | slr0039 | G0:0003676 | 0.0623 |
| slr6016 | G0:0072522 | <1e-4 | sl11512 | G0:0033013 | <1e-4 | sl11696 | G0:0022838 | <1e-4 | sl11735 | G0:0044446 | <1e-4 | sl10031 | G0:0003676 | 0.0623 |
| sl10543 | G0:0009161 | <1e-4 | sl10827 | G0:0006066 | <1e-4 | slr0801 | G0:0008171 | <1e-4 | sl10858 | G0:0044444 | <1e-4 | sl11531 | G0:0003676 | 0.0623 |
| slr1628 | G0:0048878 | <1e-4 | sl11485 | G0:0009117 | <1e-4 | slr1083 | G0:0015075 | <1e-4 | slr0975 | G0:0044444 | <1e-4 | slr8022 | G0:0003676 | 0.0623 |
| slr1940 | G0:0009260 | <1e-4 | slr8021 | G0:0080090 | <1e-4 | slr1659 | G0:0015405 | <1e-4 | slr0181 | G0:0044425 | <1e-4 | slr0217 | G0:0003676 | 0.0623 |
| sl17070 | G0:0019751 | <1e-4 | slr1704 | G0:0080090 | <1e-4 | slr0989 | G0:0043167 | <1e-4 | sl10174 | G0:0043226 | <1e-4 | sl10496 | G0:0003676 | 0.0623 |
| sl11873 | G0:0042180 | <1e-4 | ssr6062 | G0:0009117 | <1e-4 | sl10085 | G0:0015405 | <1e-4 | ssr3122 | G0:0044464 | <1e-4 | slr0587 | G0:0003676 | 0.0623 |
| slr1917 | G0:0019637 | <1e-4 | slr0356 | G0:0006631 | <1e-4 | slr0376 | G0:0043492 | <1e-4 | slr1275 | G0:0044422 | <1e-4 | sl15132 | G0:0003676 | 0.0623 |
| sl10827 | G0:0050794 | <1e-4 | slr1927 | G0:0001932 | <1e-4 | sl11355 | G0:0015267 | <1e-4 | slr1187 | G0:0044464 | <1e-4 | ssr2711 | G0:0003676 | 0.0623 |
| slr1568 | G0:0071841 | <1e-4 | slr0149 | G0:0018130 | <1e-4 | slr1914 | G0:0015291 | <1e-4 | slr1343 | G0:0044444 | <1e-4 | ssr5121 | G0:0003676 | 0.0623 |
| sl11504 | G0:0006793 | <1e-4 | slr1677 | G0:0060255 | <1e-4 | ssr6024 | G0:0015405 | <1e-4 | slr1790 | G0:0044424 | <1e-4 | slr0521 | G0:0003676 | 0.0623 |
| slr1327 | G0:0051716 | <1e-4 | ssr2554 | G0:0043412 | <1e-4 | sl11002 | G0:0022832 | <1e-4 | slr0516 | G0:0005575 | <1e-4 | slr0709 | G0:0003676 | 0.0623 |
| slr1189 | G0:0046394 | <1e-4 | slr1505 | G0:0018130 | <1e-4 | ss18039 | G0:0043167 | <1e-4 | sl11965 | G0:0044446 | <1e-4 | ssr6027 | G0:0003676 | 0.0623 |
| sl11749 | G0:0046907 | <1e-4 | slr1301 | G0:0009132 | <1e-4 | sl11135 | G0:0022892 | <1e-4 | sl11531 | G0:0044444 | <1e-4 | sl10625 | G0:0003676 | 0.0623 |
| slr0300 | G0:0044260 | <1e-4 | slr2018 | G0:0071496 | <1e-4 | ssr2787 | G0:0042623 | <1e-4 | ss10410 | G0:0043226 | <1e-4 | slr2110 | G0:0003676 | 0.0623 |
| slr6080 | G0:0046164 | <1e-4 | slr1865 | G0:0009199 | <1e-4 | sl10355 | G0:0015293 | <1e-4 | slr1122 | G0:0044425 | <1e-4 | sl10069 | G0:0003676 | 0.0623 |
| ss13383 | G0:0033013 | <1e-4 | sl10183 | G0:0016053 | <1e-4 | sl10360 | G0:0015075 | <1e-4 | slr0179 | G0:0044446 | <1e-4 | slr7100 | G0:0003676 | 0.0623 |
| ss15100 | G0:0042451 | <1e-4 | sl18033 | G0:0009199 | <1e-4 | ss17046 | G0:0022891 | <1e-4 | sl11495 | G0:0044464 | <1e-4 | ssr0761 | G0:0003676 | 0.0623 |
| slr1262 | G0:0043549 | <1e-4 | slr0806 | G0:0042455 | <1e-4 | ss18039 | G0:0015405 | <1e-4 | sl17090 | G0:0044425 | <1e-4 | slr7099 | G0:0003676 | 0.0623 |

|         |            |       |         |            |       |          |            |       |         |            |       |         |            |        |
|---------|------------|-------|---------|------------|-------|----------|------------|-------|---------|------------|-------|---------|------------|--------|
| sl11062 | G0:0072527 | <1e-4 | slr7023 | G0:0043412 | <1e-4 | sl110157 | G0:0015075 | <1e-4 | slr0609 | G0:0044464 | <1e-4 | ss11046 | G0:0003676 | 0.0623 |
| sl11426 | G0:0051186 | <1e-4 | ssr2975 | G0:0044271 | <1e-4 | slr1660  | G0:0015291 | <1e-4 | sl17087 | G0:0044424 | <1e-4 | slr0238 | G0:0003676 | 0.0623 |
| sl11396 | G0:0044271 | <1e-4 | slr0270 | G0:0044106 | <1e-4 | ssr1425  | G0:0015293 | <1e-4 | slr1541 | G0:0044444 | <1e-4 | slr0813 | G0:0003676 | 0.0623 |
| slr1223 | G0:0051818 | <1e-4 | sl16052 | G0:0080090 | <1e-4 | slr0941  | G0:0005342 | <1e-4 | slr0243 | G0:0043226 | <1e-4 | slr2004 | G0:0003676 | 0.0623 |
| slr1183 | G0:0018130 | <1e-4 | sl10910 | G0:0050801 | <1e-4 | slr1572  | G0:0022836 | <1e-4 | slr6104 | G0:0044444 | <1e-4 | sl10696 | G0:0003676 | 0.0623 |
| sl11469 | G0:0072527 | <1e-4 | slr0607 | G0:0050801 | <1e-4 | ssr6027  | G0:0015293 | <1e-4 | sl10269 | G0:0044464 | <1e-4 | sl11233 | G0:0003676 | 0.0623 |
| sl11344 | G0:0034654 | <1e-4 | slr1362 | G0:0009263 | <1e-4 | sl11306  | G0:0022891 | <1e-4 | sl11446 | G0:0044425 | <1e-4 | slr0865 | G0:0003676 | 0.0623 |
| sl11285 | G0:0009893 | <1e-4 | sl10442 | G0:0055082 | <1e-4 | sl11049  | G0:0005342 | <1e-4 | slr1397 | G0:0044425 | <1e-4 | slr6104 | G0:0003676 | 0.0623 |
| slr1951 | G0:0010556 | <1e-4 | slr1378 | G0:0072528 | <1e-4 | sl11634  | G0:0022892 | <1e-4 | slr1450 | G0:0044444 | <1e-4 | sl11726 | G0:0003676 | 0.0623 |
| ssr1258 | G0:0065007 | <1e-4 | ssl7074 | G0:0050801 | <1e-4 | sl10280  | G0:0060089 | <1e-4 | sl11613 | G0:0005575 | <1e-4 | slr1406 | G0:0003676 | 0.0623 |
| slr8044 | G0:0060255 | <1e-4 | ssl3382 | G0:0043436 | <1e-4 | slr1474  | G0:0060089 | <1e-4 | sl11399 | G0:0044425 | <1e-4 | slr2003 | G0:0003676 | 0.0623 |
| slr0333 | G0:0006732 | <1e-4 | sl11455 | G0:0034654 | <1e-4 | ssr5120  | G0:0005342 | <1e-4 | slr1816 | G0:0043226 | <1e-4 | slr0637 | G0:0003676 | 0.0623 |
| slr0179 | G0:0043436 | <1e-4 | slr0305 | G0:0010468 | <1e-4 | sl11049  | G0:0015405 | <1e-4 | slr1188 | G0:0005575 | <1e-4 | slr0689 | G0:0003676 | 0.0623 |
| slr7025 | G0:0006721 | <1e-4 | slr1068 | G0:0009141 | <1e-4 | sl10584  | G0:0005342 | <1e-4 | slr1394 | G0:0005575 | <1e-4 | sl10060 | G0:0003676 | 0.0623 |
| sl16055 | G0:0051818 | <1e-4 | slr1571 | G0:0046907 | <1e-4 | sl11783  | G0:0016741 | <1e-4 | slr1660 | G0:0044424 | <1e-4 | slr1737 | G0:0003676 | 0.0623 |
| ssr6030 | G0:0019362 | <1e-4 | sl10839 | G0:0009262 | <1e-4 | sl11765  | G0:0015291 | <1e-4 | slr2012 | G0:0044444 | <1e-4 | ssr5106 | G0:0003676 | 0.0623 |
| sl11775 | G0:0009117 | <1e-4 | slr1128 | G0:0006766 | <1e-4 | sl10740  | G0:0015405 | <1e-4 | ssr2787 | G0:0005575 | <1e-4 | slr5073 | G0:0003676 | 0.0623 |
| sl11319 | G0:0010468 | <1e-4 | slr1977 | G0:0055082 | <1e-4 | slr6049  | G0:0022857 | <1e-4 | ss15007 | G0:0044444 | <1e-4 | slr0184 | G0:0003676 | 0.0623 |
| sl10822 | G0:0006066 | <1e-4 | slr1533 | G0:0048878 | <1e-4 | sl11773  | G0:0043167 | <1e-4 | slr2080 | G0:0044422 | <1e-4 | slr0181 | G0:0003676 | 0.0623 |
| sl15046 | G0:0043648 | <1e-4 | slr0702 | G0:0072528 | <1e-4 | slr0978  | G0:0015077 | <1e-4 | slr0355 | G0:0044464 | <1e-4 | sl10253 | G0:0003676 | 0.0623 |
| slr0082 | G0:0055086 | <1e-4 | sl10661 | G0:0052111 | <1e-4 | slr1474  | G0:0022891 | <1e-4 | sl11874 | G0:0044444 | <1e-4 | sl11089 | G0:0003676 | 0.0623 |
| sl11735 | G0:0090304 | <1e-4 | slr1812 | G0:0016054 | <1e-4 | ssr2755  | G0:0022803 | <1e-4 | sl11511 | G0:0043226 | <1e-4 | sl15030 | G0:0003676 | 0.0623 |
| slr1032 | G0:0051179 | <1e-4 | sl11911 | G0:0019637 | <1e-4 | sl11378  | G0:0060089 | <1e-4 | sl10905 | G0:0044464 | <1e-4 | slr6068 | G0:0003676 | 0.0623 |
| slr1956 | G0:0044282 | <1e-4 | slr1614 | G0:0044260 | <1e-4 | slr1070  | G0:0016817 | <1e-4 | sl17033 | G0:0044425 | <1e-4 | ssr2060 | G0:0003676 | 0.0623 |
| slr6008 | G0:0006811 | <1e-4 | slr1778 | G0:0009394 | <1e-4 | ssr6078  | G0:0022892 | <1e-4 | slr1505 | G0:0005575 | <1e-4 | sl18001 | G0:0003676 | 0.0623 |
| slr1721 | G0:0009892 | <1e-4 | ssr1407 | G0:0034654 | <1e-4 | slr0728  | G0:0005342 | <1e-4 | ssr7084 | G0:0044444 | <1e-4 | slr1980 | G0:0003676 | 0.0623 |
| slr1270 | G0:0009260 | <1e-4 | slr7094 | G0:0046907 | <1e-4 | sl15004  | G0:0015405 | <1e-4 | sl11273 | G0:0005575 | <1e-4 | sl11285 | G0:0003676 | 0.0623 |
| slr0605 | G0:0060255 | <1e-4 | slr1593 | G0:0046483 | <1e-4 | slr1865  | G0:0022836 | <1e-4 | sl11164 | G0:0044464 | <1e-4 | sl11609 | G0:0003676 | 0.0623 |
| sl18035 | G0:0019752 | <1e-4 | ssr2422 | G0:0065007 | <1e-4 | sl15006  | G0:0016741 | <1e-4 | sl15030 | G0:0005575 | <1e-4 | slr1507 | G0:0003676 | 0.0623 |
| slr1340 | G0:0034641 | <1e-4 | slr0456 | G0:0051234 | <1e-4 | sl11247  | G0:0042623 | <1e-4 | slr6081 | G0:0043226 | <1e-4 | slr8021 | G0:0003676 | 0.0623 |
| slr0148 | G0:0034654 | <1e-4 | slr0270 | G0:0044248 | <1e-4 | sl17047  | G0:0060089 | <1e-4 | slr1767 | G0:0044425 | <1e-4 | sl10905 | G0:0003676 | 0.0623 |
| sl10985 | G0:0034660 | <1e-4 | sl10518 | G0:0009117 | <1e-4 | ssr6030  | G0:0003674 | <1e-4 | slr5023 | G0:0044424 | <1e-4 | ss15114 | G0:0003676 | 0.0623 |
| sl10208 | G0:0055114 | <1e-4 | slr0888 | G0:0046907 | <1e-4 | sl10176  | G0:0015077 | <1e-4 | sl10606 | G0:0005575 | <1e-4 | slr0602 | G0:0016787 | 0.0614 |
| slr1807 | G0:0034641 | <1e-4 | slr0590 | G0:0034641 | <1e-4 | ss12148  | G0:0060089 | <1e-4 | slr1593 | G0:0044422 | <1e-4 | slr0771 | G0:0017111 | 0.0589 |
| sl10781 | G0:0050801 | <1e-4 | sl18004 | G0:0051179 | <1e-4 | sl10871  | G0:0043167 | <1e-4 | slr1406 | G0:0044464 | <1e-4 | slr0731 | G0:0017111 | 0.0589 |
| ss10467 | G0:0055114 | <1e-4 | slr0554 | G0:0019752 | <1e-4 | sl11726  | G0:0042623 | <1e-4 | sl10478 | G0:0005575 | <1e-4 | ssr0761 | G0:0017111 | 0.0589 |
| sl10803 | G0:0044106 | <1e-4 | sl10381 | G0:0006220 | <1e-4 | slr1613  | G0:0015399 | <1e-4 | slr0582 | G0:0044425 | <1e-4 | sl10565 | G0:0017111 | 0.0589 |
| sl10543 | G0:0044275 | <1e-4 | sl10265 | G0:0071841 | <1e-4 | ssr2787  | G0:0022838 | <1e-4 | slr1117 | G0:0044425 | <1e-4 | sl10376 | G0:0017111 | 0.0589 |
| slr1590 | G0:0009199 | <1e-4 | slr5102 | G0:0009308 | <1e-4 | slr0569  | G0:0042623 | <1e-4 | sl10147 | G0:0044464 | <1e-4 | slr5012 | G0:0017111 | 0.0589 |
| sl11340 | G0:0048523 | <1e-4 | sl10787 | G0:0006811 | <1e-4 | slr1636  | G0:0043492 | <1e-4 | sl11025 | G0:0044444 | <1e-4 | slr1142 | G0:0017111 | 0.0589 |
| slr1900 | G0:0009059 | <1e-4 | sl11835 | G0:0051186 | <1e-4 | sl10678  | G0:0022838 | <1e-4 | slr0376 | G0:0044444 | <1e-4 | sl18040 | G0:0017111 | 0.0589 |
| slr1261 | G0:0042455 | <1e-4 | slr7080 | G0:0019751 | <1e-4 | slr0863  | G0:0015267 | <1e-4 | slr1315 | G0:0005575 | <1e-4 | slr0813 | G0:0017111 | 0.0589 |
| slr1462 | G0:0051171 | <1e-4 | slr1110 | G0:0006066 | <1e-4 | slr1970  | G0:0005342 | <1e-4 | sl10249 | G0:0044444 | <1e-4 | slr1290 | G0:0017111 | 0.0589 |
| ss11923 | G0:0043648 | <1e-4 | sl11586 | G0:0065007 | <1e-4 | sl10630  | G0:0042623 | <1e-4 | slr1667 | G0:0044444 | <1e-4 | sl10905 | G0:0017111 | 0.0589 |
| ss17022 | G0:0009308 | <1e-4 | slr1557 | G0:0055082 | <1e-4 | sl10763  | G0:0016746 | <1e-4 | slr1690 | G0:0044424 | <1e-4 | slr0816 | G0:0017111 | 0.0589 |
| sl10565 | G0:0006732 | <1e-4 | slr1573 | G0:0009262 | <1e-4 | slr0613  | G0:0043167 | <1e-4 | slr1644 | G0:0005575 | <1e-4 | slr1704 | G0:0017111 | 0.0589 |
| ss10410 | G0:0051188 | <1e-4 | sl11915 | G0:0045184 | <1e-4 | ss15100  | G0:0022890 | <1e-4 | ss15015 | G0:0044425 | <1e-4 | slr1627 | G0:0017111 | 0.0589 |
| slr7101 | G0:0009987 | <1e-4 | slr0250 | G0:0006753 | <1e-4 | sl11241  | G0:0022838 | <1e-4 | slr0121 | G0:0044422 | <1e-4 | slr1623 | G0:0017111 | 0.0589 |
| slr0147 | G0:0006631 | <1e-4 | ss18005 | G0:0010556 | <1e-4 | slr0184  | G0:0015077 | <1e-4 | slr1990 | G0:0044422 | <1e-4 | slr6045 | G0:0017111 | 0.0589 |
| sl11611 | G0:0006576 | <1e-4 | slr1875 | G0:0006766 | <1e-4 | sl12006  | G0:0022890 | <1e-4 | sl17065 | G0:0043226 | <1e-4 | ss15108 | G0:0017111 | 0.0589 |
| sl11730 | G0:0043436 | <1e-4 | slr1230 | G0:0090304 | <1e-4 | slr7011  | G0:0008171 | <1e-4 | ss17039 | G0:0044464 | <1e-4 | ssr6086 | G0:0017111 | 0.0589 |
| ss12245 | G0:0006811 | <1e-4 | slr7037 | G0:0071496 | <1e-4 | sl11835  | G0:0043492 | <1e-4 | sl10198 | G0:0005575 | <1e-4 | ss17048 | G0:0017111 | 0.0589 |
| ss13829 | G0:0060255 | <1e-4 | slr1179 | G0:0042455 | <1e-4 | sl10372  | G0:0016817 | <1e-4 | slr1206 | G0:0005575 | <1e-4 | sl17086 | G0:0017111 | 0.0589 |
| slr1854 | G0:0055114 | <1e-4 | sl10513 | G0:0046907 | <1e-4 | slr1917  | G0:0015291 | <1e-4 | sl11071 | G0:0044424 | <1e-4 | slr5127 | G0:0017111 | 0.0589 |

|          |            |       |          |            |       |         |            |       |         |            |       |          |            |        |
|----------|------------|-------|----------|------------|-------|---------|------------|-------|---------|------------|-------|----------|------------|--------|
| ssl1004  | G0:0006631 | <1e-4 | slr1660  | G0:0006811 | <1e-4 | slr1438 | G0:0016741 | <1e-4 | slr0712 | G0:0044464 | <1e-4 | sl10172  | G0:0017111 | 0.0589 |
| sl11285  | G0:0001932 | <1e-4 | sl11186  | G0:0006732 | <1e-4 | sl11726 | G0:0043492 | <1e-4 | slr1590 | G0:0044425 | <1e-4 | sl11319  | G0:0017111 | 0.0589 |
| sl11089  | G0:0044282 | <1e-4 | ssl10352 | G0:0042180 | <1e-4 | ssl2807 | G0:0022838 | <1e-4 | slr1189 | G0:0044446 | <1e-4 | slr0976  | G0:0017111 | 0.0589 |
| slr0751  | G0:0051188 | <1e-4 | slr0519  | G0:0019222 | <1e-4 | slr0989 | G0:0042623 | <1e-4 | sl10237 | G0:0044422 | <1e-4 | slr7091  | G0:0017111 | 0.0589 |
| slr0326  | G0:0009987 | <1e-4 | slr1773  | G0:0044283 | <1e-4 | slr7026 | G0:0016741 | <1e-4 | slr0742 | G0:0044425 | <1e-4 | slr5111  | G0:0017111 | 0.0589 |
| sl11040  | G0:0006066 | <1e-4 | slr1816  | G0:0006066 | <1e-4 | sl17077 | G0:0015405 | <1e-4 | sl10661 | G0:0044446 | <1e-4 | sl18011  | G0:0017111 | 0.0589 |
| sl11995  | G0:0009889 | <1e-4 | slr6044  | G0:0046483 | <1e-4 | sl10572 | G0:0015405 | <1e-4 | slr0456 | G0:0005575 | <1e-4 | ssl1378  | G0:0017111 | 0.0589 |
| slr0708  | G0:0009165 | <1e-4 | slr0609  | G0:0009263 | <1e-4 | ssl1378 | G0:0022803 | <1e-4 | slr0954 | G0:0044444 | <1e-4 | ssr8047  | G0:0017111 | 0.0589 |
| sl11396  | G0:0009132 | <1e-4 | slr1533  | G0:0042180 | <1e-4 | sl10230 | G0:0016741 | <1e-4 | sl17034 | G0:0043226 | <1e-4 | slr0656  | G0:0017111 | 0.0589 |
| sl10802  | G0:0051347 | <1e-4 | ssr7036  | G0:0043933 | <1e-4 | sl11340 | G0:0016741 | <1e-4 | slr1114 | G0:0005575 | <1e-4 | slr0106  | G0:0017111 | 0.0589 |
| sl10586  | G0:0043549 | <1e-4 | slr0921  | G0:0046128 | <1e-4 | sl11232 | G0:0015405 | <1e-4 | slr1343 | G0:0005575 | <1e-4 | sl15003  | G0:0017111 | 0.0589 |
| sl10751  | G0:0008150 | <1e-4 | slr1681  | G0:0045184 | <1e-4 | slr2000 | G0:0043492 | <1e-4 | slr0981 | G0:0005575 | <1e-4 | ssr2318  | G0:0017111 | 0.0589 |
| sl11461  | G0:0008610 | <1e-4 | sl11411  | G0:0072524 | <1e-4 | slr2005 | G0:0016746 | <1e-4 | sl11858 | G0:0044424 | <1e-4 | sl11692  | G0:0017111 | 0.0589 |
| sl10547  | G0:0009893 | <1e-4 | ssr2781  | G0:0065007 | <1e-4 | slr6101 | G0:0008171 | <1e-4 | sl11219 | G0:0044424 | <1e-4 | sl11340  | G0:0017111 | 0.0589 |
| slr1644  | G0:0043436 | <1e-4 | slr1114  | G0:0009308 | <1e-4 | slr1396 | G0:0042623 | <1e-4 | sl10780 | G0:0044422 | <1e-4 | slr1438  | G0:0017111 | 0.0589 |
| sl10802  | G0:0009117 | <1e-4 | sl10910  | G0:0016052 | <1e-4 | slr1045 | G0:0022890 | <1e-4 | sl10614 | G0:0044446 | <1e-4 | sl17089  | G0:0017111 | 0.0589 |
| slr0374  | G0:0009057 | <1e-4 | slr1378  | G0:0044271 | <1e-4 | sl11068 | G0:0022838 | <1e-4 | sl11764 | G0:0005575 | <1e-4 | ssl17022 | G0:0017111 | 0.0589 |
| ssl2595  | G0:0072521 | <1e-4 | sl10839  | G0:0048518 | <1e-4 | sl11783 | G0:0022857 | <1e-4 | slr0038 | G0:0044444 | <1e-4 | sl18035  | G0:0017111 | 0.0589 |
| sl11882  | G0:0072524 | <1e-4 | ssl5098  | G0:0019751 | <1e-4 | slr2027 | G0:0016818 | <1e-4 | sl11950 | G0:0044464 | <1e-4 | sl11495  | G0:0017111 | 0.0589 |
| slr0740  | G0:0034654 | <1e-4 | slr1915  | G0:0042180 | <1e-4 | ssl1417 | G0:0015405 | <1e-4 | slr1170 | G0:0044425 | <1e-4 | sl11926  | G0:0017111 | 0.0589 |
| ssr1407  | G0:0008150 | <1e-4 | slr2111  | G0:0044255 | <1e-4 | slr0589 | G0:0015405 | <1e-4 | sl10558 | G0:0044444 | <1e-4 | slr0610  | G0:0017111 | 0.0589 |
| sl11834  | G0:0042180 | <1e-4 | sl11355  | G0:0055086 | <1e-4 | sl15026 | G0:0015075 | <1e-4 | sl11373 | G0:0044446 | <1e-4 | sl15128  | G0:0017111 | 0.0589 |
| sl15047  | G0:0006732 | <1e-4 | slr0765  | G0:0044275 | <1e-4 | slr1170 | G0:0015293 | <1e-4 | slr6103 | G0:0044446 | <1e-4 | slr1819  | G0:0017111 | 0.0589 |
| sl11461  | G0:0043412 | <1e-4 | sl10482  | G0:0009144 | <1e-4 | slr0554 | G0:0022803 | <1e-4 | sl10068 | G0:0044425 | <1e-4 | sl10294  | G0:0017111 | 0.0589 |
| sl11188  | G0:0051716 | <1e-4 | slr0006  | G0:0006163 | <1e-4 | slr1657 | G0:0022892 | <1e-4 | sl10048 | G0:0043226 | <1e-4 | slr6022  | G0:0017111 | 0.0589 |
| slr1864  | G0:0072528 | <1e-4 | sl10802  | G0:0008150 | <1e-4 | sl10909 | G0:0060089 | <1e-4 | slr1513 | G0:0005575 | <1e-4 | slr1087  | G0:0017111 | 0.0589 |
| ssl2162  | G0:0071554 | <1e-4 | ssr3341  | G0:0009889 | <1e-4 | slr0038 | G0:0008171 | <1e-4 | slr1702 | G0:0005575 | <1e-4 | ssr7035  | G0:0017111 | 0.0589 |
| ssl1378  | G0:0006733 | <1e-4 | ssl3451  | G0:0051347 | <1e-4 | ssr2998 | G0:0022838 | <1e-4 | slr0302 | G0:0044425 | <1e-4 | slr1079  | G0:0017111 | 0.0589 |
| sl10827  | G0:0009142 | <1e-4 | slr0149  | G0:0019752 | <1e-4 | sl10445 | G0:0015291 | <1e-4 | sl10994 | G0:0044424 | <1e-4 | ssl3829  | G0:0017111 | 0.0589 |
| sl11766  | G0:0019752 | <1e-4 | slr5024  | G0:0046128 | <1e-4 | ssl7074 | G0:0060089 | <1e-4 | slr1034 | G0:0044422 | <1e-4 | sl10101  | G0:0017111 | 0.0589 |
| sl11938  | G0:0006732 | <1e-4 | slr0148  | G0:0043412 | <1e-4 | slr1854 | G0:0042623 | <1e-4 | slr1591 | G0:0005575 | <1e-4 | sl16055  | G0:0017111 | 0.0589 |
| sl10447  | G0:0071496 | <1e-4 | slr0651  | G0:0051716 | <1e-4 | ssr5020 | G0:0015399 | <1e-4 | slr1301 | G0:0005575 | <1e-4 | sl11192  | G0:0017111 | 0.0589 |
| sl10997  | G0:0071496 | <1e-4 | slr1667  | G0:0044106 | <1e-4 | sl10282 | G0:0022836 | <1e-4 | slr1577 | G0:0044424 | <1e-4 | sl11158  | G0:0017111 | 0.0589 |
| ssr2711  | G0:0065007 | <1e-4 | slr1951  | G0:0044275 | <1e-4 | slr6106 | G0:0016817 | <1e-4 | slr1363 | G0:0044446 | <1e-4 | slr0300  | G0:0017111 | 0.0589 |
| slr1098  | G0:0009142 | <1e-4 | slr1169  | G0:0072521 | <1e-4 | sl11530 | G0:0016817 | <1e-4 | sl15130 | G0:0044425 | <1e-4 | ssl1046  | G0:0017111 | 0.0589 |
| sl10539  | G0:0042455 | <1e-4 | slr1413  | G0:0009987 | <1e-4 | sl11634 | G0:0015293 | <1e-4 | slr0755 | G0:0044424 | <1e-4 | sl10552  | G0:0017111 | 0.0589 |
| slr1353  | G0:0055086 | <1e-4 | sl10286  | G0:0009263 | <1e-4 | sl10763 | G0:0015075 | <1e-4 | sl10101 | G0:0044444 | <1e-4 | slr7073  | G0:0017111 | 0.0589 |
| slr0303  | G0:0044248 | <1e-4 | sl11319  | G0:0071842 | <1e-4 | slr1084 | G0:0022803 | <1e-4 | slr1025 | G0:0043226 | <1e-4 | sl15067  | G0:0017111 | 0.0589 |
| slr0742  | G0:0019752 | <1e-4 | sl10473  | G0:0051716 | <1e-4 | sl10160 | G0:0060089 | <1e-4 | sl10198 | G0:0044425 | <1e-4 | slr1114  | G0:0017111 | 0.0589 |
| slr6038  | G0:0006732 | <1e-4 | slr1977  | G0:0044281 | <1e-4 | ssl2920 | G0:0015293 | <1e-4 | sl10524 | G0:0044422 | <1e-4 | sl11024  | G0:0017111 | 0.0589 |
| slr6044  | G0:0006793 | <1e-4 | ssr1765  | G0:0044271 | <1e-4 | slr0505 | G0:0022836 | <1e-4 | ssl1520 | G0:0044446 | <1e-4 | ssr7079  | G0:0017111 | 0.0589 |
| sl11285  | G0:0060255 | <1e-4 | slr1179  | G0:0009263 | <1e-4 | sl11378 | G0:0016746 | <1e-4 | slr0146 | G0:0044446 | <1e-4 | slr1449  | G0:0017111 | 0.0589 |
| sl11352  | G0:0051716 | <1e-4 | sl11373  | G0:0034660 | <1e-4 | sl10381 | G0:0022832 | <1e-4 | slr0209 | G0:0005575 | <1e-4 | ssr7093  | G0:0017111 | 0.0589 |
| sl11388  | G0:0006066 | <1e-4 | sl17063  | G0:0009308 | <1e-4 | sl10321 | G0:0015405 | <1e-4 | slr0456 | G0:0044464 | <1e-4 | slr0780  | G0:0017111 | 0.0589 |
| ssl2717  | G0:0046128 | <1e-4 | slr1767  | G0:0050789 | <1e-4 | slr0059 | G0:0015075 | <1e-4 | ssr6083 | G0:0044422 | <1e-4 | sl11698  | G0:0017111 | 0.0589 |
| sl16052  | G0:0044275 | <1e-4 | slr2005  | G0:0009262 | <1e-4 | sl11002 | G0:0016741 | <1e-4 | sl11372 | G0:0044424 | <1e-4 | sl17033  | G0:0017111 | 0.0589 |
| ssr0332  | G0:0090304 | <1e-4 | ssr2615  | G0:0006721 | <1e-4 | slr0863 | G0:0042623 | <1e-4 | slr5021 | G0:0044444 | <1e-4 | slr0217  | G0:0017111 | 0.0589 |
| sl11254  | G0:0006766 | <1e-4 | sl10008  | G0:0019637 | <1e-4 | sl10811 | G0:0015405 | <1e-4 | slr1084 | G0:0044425 | <1e-4 | sl11151  | G0:0017111 | 0.0589 |
| ssl18028 | G0:0010468 | <1e-4 | sl10584  | G0:0022607 | <1e-4 | sl11691 | G0:0022832 | <1e-4 | slr7015 | G0:0043226 | <1e-4 | ssr7017  | G0:0017111 | 0.0589 |
| slr1032  | G0:0034654 | <1e-4 | slr1114  | G0:0009165 | <1e-4 | slr1394 | G0:0042623 | <1e-4 | sl10804 | G0:0044444 | <1e-4 | slr0634  | G0:0017111 | 0.0589 |
| sl11606  | G0:0006082 | <1e-4 | sl11352  | G0:0018130 | <1e-4 | ssl0787 | G0:0016462 | <1e-4 | sl10547 | G0:0044424 | <1e-4 | slr1816  | G0:0017111 | 0.0589 |
| slr0912  | G0:0006220 | <1e-4 | slr1378  | G0:0009126 | <1e-4 | sl10177 | G0:0005342 | <1e-4 | ssl0738 | G0:0044444 | <1e-4 | slr1599  | G0:0017111 | 0.0589 |
| sl18004  | G0:0031323 | <1e-4 | ssl1514  | G0:0009142 | <1e-4 | sl11174 | G0:0015293 | <1e-4 | ssr6089 | G0:0005575 | <1e-4 | sl11188  | G0:0017111 | 0.0589 |
| sl10524  | G0:0009987 | <1e-4 | ssr6083  | G0:0044275 | <1e-4 | slr1980 | G0:0005342 | <1e-4 | sl10735 | G0:0044422 | <1e-4 | slr0013  | G0:0017111 | 0.0589 |

|         |            |       |         |            |       |         |            |       |         |            |       |         |            |        |
|---------|------------|-------|---------|------------|-------|---------|------------|-------|---------|------------|-------|---------|------------|--------|
| ssr8047 | G0:0019222 | <1e-4 | s111025 | G0:0050789 | <1e-4 | slr0112 | G0:0016741 | <1e-4 | ssr3409 | G0:0043226 | <1e-4 | s111882 | G0:0017111 | 0.0589 |
| ss12148 | G0:0009141 | <1e-4 | ssr0657 | G0:0043412 | <1e-4 | slr1900 | G0:0016818 | <1e-4 | slr1753 | G0:0044425 | <1e-4 | s111164 | G0:0017111 | 0.0589 |
| s110811 | G0:0051818 | <1e-4 | slr0269 | G0:0055086 | <1e-4 | s110602 | G0:0005342 | <1e-4 | ss11972 | G0:0005575 | <1e-4 | s110847 | G0:0017111 | 0.0589 |
| s115062 | G0:0009126 | <1e-4 | ss12996 | G0:0006091 | <1e-4 | slr0872 | G0:0022832 | <1e-4 | slr1737 | G0:0005575 | <1e-4 | s110608 | G0:0017111 | 0.0589 |
| slr2003 | G0:0034660 | <1e-4 | s111289 | G0:0051246 | <1e-4 | slr1362 | G0:0043492 | <1e-4 | slr2101 | G0:0043226 | <1e-4 | s111979 | G0:0017111 | 0.0589 |
| ssr1256 | G0:0044255 | <1e-4 | slr2049 | G0:0022411 | <1e-4 | ssr2754 | G0:0016818 | <1e-4 | slr1895 | G0:0044422 | <1e-4 | s111583 | G0:0017111 | 0.0589 |
| s111089 | G0:0050794 | <1e-4 | s111906 | G0:0016054 | <1e-4 | slr1880 | G0:0022832 | <1e-4 | slr0729 | G0:0044424 | <1e-4 | slr1513 | G0:0017111 | 0.0589 |
| s115032 | G0:0019222 | <1e-4 | s110023 | G0:0055114 | <1e-4 | ss11300 | G0:0016746 | <1e-4 | slr1074 | G0:0044446 | <1e-4 | slr2000 | G0:0017111 | 0.0589 |
| slr7060 | G0:0050794 | <1e-4 | slr0271 | G0:0031323 | <1e-4 | s110498 | G0:0005342 | <1e-4 | s110691 | G0:0044446 | <1e-4 | slr0184 | G0:0017111 | 0.0589 |
| s111142 | G0:0001932 | <1e-4 | slr1636 | G0:0009892 | <1e-4 | s111530 | G0:0022832 | <1e-4 | slr1184 | G0:0005575 | <1e-4 | slr0273 | G0:0017111 | 0.0589 |
| s110424 | G0:0043170 | <1e-4 | slr0978 | G0:0010468 | <1e-4 | slr0712 | G0:0015267 | <1e-4 | ss11918 | G0:0044464 | <1e-4 | s117090 | G0:0017111 | 0.0589 |
| s111658 | G0:0065007 | <1e-4 | slr1152 | G0:0071496 | <1e-4 | slr1303 | G0:0015405 | <1e-4 | s111123 | G0:0044444 | <1e-4 | slr1570 | G0:0017111 | 0.0589 |
| slr1875 | G0:0018130 | <1e-4 | slr0408 | G0:0051716 | <1e-4 | slr1230 | G0:0022838 | <1e-4 | s110253 | G0:0044425 | <1e-4 | ssr1155 | G0:0017111 | 0.0589 |
| s110584 | G0:0006163 | <1e-4 | slr1073 | G0:0033013 | <1e-4 | s110499 | G0:0015399 | <1e-4 | slr1535 | G0:0044446 | <1e-4 | slr6075 | G0:0017111 | 0.0589 |
| s111654 | G0:0008610 | <1e-4 | s110661 | G0:0080090 | <1e-4 | s111863 | G0:0005342 | <1e-4 | slr2042 | G0:0044422 | <1e-4 | slr0575 | G0:0017111 | 0.0589 |
| ss15129 | G0:0072521 | <1e-4 | slr1462 | G0:0051716 | <1e-4 | slr5127 | G0:0015075 | <1e-4 | ssr2611 | G0:0043226 | <1e-4 | s111486 | G0:0017111 | 0.0589 |
| s110547 | G0:0009056 | <1e-4 | s110539 | G0:0060255 | <1e-4 | slr1648 | G0:0022857 | <1e-4 | slr1464 | G0:0044422 | <1e-4 | s111191 | G0:0017111 | 0.0589 |
| slr0919 | G0:0072528 | <1e-4 | ssr7036 | G0:0006576 | <1e-4 | ssr5092 | G0:0015405 | <1e-4 | s111071 | G0:0044422 | <1e-4 | s111784 | G0:0017111 | 0.0589 |
| ssr1375 | G0:0051246 | <1e-4 | s111092 | G0:0042180 | <1e-4 | slr0981 | G0:0015405 | <1e-4 | slr0919 | G0:0044425 | <1e-4 | s110793 | G0:0017111 | 0.0589 |
| slr5013 | G0:0022411 | <1e-4 | slr6005 | G0:0005996 | <1e-4 | slr1812 | G0:0022891 | <1e-4 | s111130 | G0:0044444 | <1e-4 | slr0285 | G0:0017111 | 0.0589 |
| slr2060 | G0:0022607 | <1e-4 | slr6064 | G0:0009987 | <1e-4 | slr1169 | G0:0060089 | <1e-4 | ssr0761 | G0:0044422 | <1e-4 | s110044 | G0:0017111 | 0.0589 |
| slr7097 | G0:0016053 | <1e-4 | s111640 | G0:0019222 | <1e-4 | slr1230 | G0:0015291 | <1e-4 | s117034 | G0:0044422 | <1e-4 | s110479 | G0:0017111 | 0.0589 |
| slr0787 | G0:0072521 | <1e-4 | s110639 | G0:0051179 | <1e-4 | slr1576 | G0:0060089 | <1e-4 | ss15099 | G0:0005575 | <1e-4 | ssr6019 | G0:0017111 | 0.0589 |
| slr1419 | G0:0060255 | <1e-4 | ss13379 | G0:0009308 | <1e-4 | s111399 | G0:0015405 | <1e-4 | slr0374 | G0:0043226 | <1e-4 | s117034 | G0:0017111 | 0.0589 |
| slr1875 | G0:0008150 | <1e-4 | slr1116 | G0:0044281 | <1e-4 | slr2117 | G0:0015399 | <1e-4 | slr2060 | G0:0043226 | <1e-4 | s115063 | G0:0017111 | 0.0589 |
| slr1161 | G0:0043549 | <1e-4 | ss13549 | G0:0046128 | <1e-4 | slr0468 | G0:0015267 | <1e-4 | slr0773 | G0:0044424 | <1e-4 | s111891 | G0:0017111 | 0.0589 |
| s111262 | G0:0009132 | <1e-4 | slr1623 | G0:0009309 | <1e-4 | slr0250 | G0:0022838 | <1e-4 | s110410 | G0:0044444 | <1e-4 | ss11300 | G0:0017111 | 0.0589 |
| s111652 | G0:0044248 | <1e-4 | s111715 | G0:0006721 | <1e-4 | slr1907 | G0:0022803 | <1e-4 | s111119 | G0:0044446 | <1e-4 | ssr2060 | G0:0017111 | 0.0589 |
| slr5012 | G0:0044260 | <1e-4 | slr1438 | G0:0006720 | <1e-4 | slr0423 | G0:0043167 | <1e-4 | ss11004 | G0:0044425 | <1e-4 | ssr2711 | G0:0017111 | 0.0589 |
| ssr0692 | G0:0001932 | <1e-4 | slr1533 | G0:0008150 | <1e-4 | slr0637 | G0:0022857 | <1e-4 | s111095 | G0:0044446 | <1e-4 | ss15114 | G0:0017111 | 0.0589 |
| s110008 | G0:0009308 | <1e-4 | slr1230 | G0:0042455 | <1e-4 | slr1074 | G0:0043492 | <1e-4 | s111289 | G0:0044422 | <1e-4 | ss17007 | G0:0017111 | 0.0589 |
| slr2120 | G0:0033013 | <1e-4 | slr0509 | G0:0044003 | <1e-4 | s110547 | G0:0022891 | <1e-4 | s110369 | G0:0005575 | <1e-4 | slr0238 | G0:0017111 | 0.0589 |
| ssr1256 | G0:0065007 | <1e-4 | s117090 | G0:0050801 | <1e-4 | s111240 | G0:0022857 | <1e-4 | s110609 | G0:0044446 | <1e-4 | ssr2047 | G0:0017111 | 0.0589 |
| slr0108 | G0:0022607 | <1e-4 | slr0654 | G0:0033013 | <1e-4 | s110669 | G0:0008171 | <1e-4 | ss15045 | G0:0044422 | <1e-4 | ssr5106 | G0:0017111 | 0.0589 |
| ssr6026 | G0:0006720 | <1e-4 | s110871 | G0:0019637 | <1e-4 | slr5053 | G0:0016818 | <1e-4 | slr1647 | G0:0005575 | <1e-4 | s111307 | G0:0017111 | 0.0589 |
| ss10788 | G0:0009117 | <1e-4 | ssr2711 | G0:0052188 | <1e-4 | s110984 | G0:0003674 | <1e-4 | slr1563 | G0:0044444 | <1e-4 | s115028 | G0:0017111 | 0.0589 |
| s110857 | G0:0022607 | <1e-4 | slr0957 | G0:0008610 | <1e-4 | slr0397 | G0:0008171 | <1e-4 | s111024 | G0:0044424 | <1e-4 | slr2012 | G0:0017111 | 0.0589 |
| s110572 | G0:0009117 | <1e-4 | s110743 | G0:0016054 | <1e-4 | slr0912 | G0:0015077 | <1e-4 | s111512 | G0:0043226 | <1e-4 | slr0590 | G0:0017111 | 0.0589 |
| slr1194 | G0:0046164 | <1e-4 | slr0801 | G0:0019362 | <1e-4 | s111158 | G0:0022891 | <1e-4 | ssr6062 | G0:0005575 | <1e-4 | ssr6024 | G0:0017111 | 0.0589 |
| slr0262 | G0:0010556 | <1e-4 | slr0169 | G0:0019222 | <1e-4 | s111225 | G0:0022892 | <1e-4 | slr1657 | G0:0044425 | <1e-4 | slr0651 | G0:0017111 | 0.0589 |
| s110815 | G0:0009991 | <1e-4 | s117031 | G0:0016053 | <1e-4 | s110614 | G0:0022891 | <1e-4 | slr6090 | G0:0044424 | <1e-4 | ssr5092 | G0:0017111 | 0.0589 |
| slr0787 | G0:0051347 | <1e-4 | s110243 | G0:0051347 | <1e-4 | s110410 | G0:0060089 | <1e-4 | s110602 | G0:0044422 | <1e-4 | slr0345 | G0:0017111 | 0.0589 |
| slr1847 | G0:0009991 | <1e-4 | s111426 | G0:0006811 | <1e-4 | s110539 | G0:0022857 | <1e-4 | s111389 | G0:0044422 | <1e-4 | s110939 | G0:0017111 | 0.0589 |
| ssr2711 | G0:0009057 | <1e-4 | slr0232 | G0:0019219 | <1e-4 | s111542 | G0:0016818 | <1e-4 | s110846 | G0:0044444 | <1e-4 | slr0613 | G0:0017111 | 0.0589 |
| ss16035 | G0:0009123 | <1e-4 | slr1814 | G0:0009117 | <1e-4 | s110361 | G0:0015293 | <1e-4 | s115047 | G0:0044422 | <1e-4 | ssr3570 | G0:0017111 | 0.0589 |
| s110518 | G0:0009893 | <1e-4 | slr1753 | G0:0006082 | <1e-4 | s111380 | G0:0015293 | <1e-4 | ss15114 | G0:0044425 | <1e-4 | ss15025 | G0:0017111 | 0.0589 |
| s111340 | G0:0019752 | <1e-4 | s110984 | G0:0055114 | <1e-4 | s111761 | G0:0016818 | <1e-4 | s110775 | G0:0044422 | <1e-4 | slr0730 | G0:0017111 | 0.0589 |
| ssr6085 | G0:0009309 | <1e-4 | slr1546 | G0:0006066 | <1e-4 | s117078 | G0:0015405 | <1e-4 | slr6066 | G0:0044425 | <1e-4 | slr2004 | G0:0017111 | 0.0589 |
| slr1203 | G0:0044260 | <1e-4 | slr1721 | G0:0005996 | <1e-4 | s110811 | G0:0022857 | <1e-4 | slr1644 | G0:0044464 | <1e-4 | s110060 | G0:0017111 | 0.0589 |
| s110552 | G0:0009165 | <1e-4 | slr0731 | G0:0080090 | <1e-4 | slr0192 | G0:0016817 | <1e-4 | slr0521 | G0:0044422 | <1e-4 | ssr6062 | G0:0017111 | 0.0589 |
| s117087 | G0:0071554 | <1e-4 | s111192 | G0:0009150 | <1e-4 | slr2117 | G0:0016818 | <1e-4 | s110162 | G0:0044444 | <1e-4 | slr0689 | G0:0017111 | 0.0589 |
| slr1052 | G0:0006753 | <1e-4 | s111752 | G0:0019637 | <1e-4 | slr1648 | G0:0016818 | <1e-4 | slr0359 | G0:0005575 | <1e-4 | s111388 | G0:0017111 | 0.0589 |
| slr0914 | G0:0010556 | <1e-4 | slr1900 | G0:0009165 | <1e-4 | slr7013 | G0:0008171 | <1e-4 | ssr7093 | G0:0044422 | <1e-4 | slr1970 | G0:0017111 | 0.0589 |
| slr1472 | G0:0050789 | <1e-4 | s110451 | G0:0043648 | <1e-4 | s111352 | G0:0015293 | <1e-4 | s110702 | G0:0044425 | <1e-4 | s111834 | G0:0017111 | 0.0589 |

|          |            |       |          |            |       |         |            |       |         |            |       |         |            |        |
|----------|------------|-------|----------|------------|-------|---------|------------|-------|---------|------------|-------|---------|------------|--------|
| slr1570  | G0:0072522 | <1e-4 | ssr0109  | G0:0046394 | <1e-4 | slr1290 | G0:0015293 | <1e-4 | slr1103 | G0:0044424 | <1e-4 | sl11898 | G0:0017111 | 0.0589 |
| slr0108  | G0:0043412 | <1e-4 | sl10281  | G0:0034654 | <1e-4 | sl10096 | G0:0008171 | <1e-4 | ssl3615 | G0:0044444 | <1e-4 | sl10298 | G0:0017111 | 0.0589 |
| sl11359  | G0:0071496 | <1e-4 | ssr0536  | G0:0051246 | <1e-4 | slr0509 | G0:0022857 | <1e-4 | ssl2069 | G0:0043226 | <1e-4 | slr1681 | G0:0017111 | 0.0589 |
| slr0341  | G0:0018130 | <1e-4 | ssl5031  | G0:0051234 | <1e-4 | sl10242 | G0:0016829 | <1e-4 | ssl2807 | G0:0044424 | <1e-4 | sl10563 | G0:0017111 | 0.0589 |
| slr1970  | G0:0019637 | <1e-4 | sl11863  | G0:0050794 | <1e-4 | sl11765 | G0:0042623 | <1e-4 | ssr6083 | G0:0044444 | <1e-4 | ssl2384 | G0:0017111 | 0.0589 |
| sl10743  | G0:0018130 | <1e-4 | slr1813  | G0:0055082 | <1e-4 | ssr6078 | G0:0016462 | <1e-4 | slr1752 | G0:0044464 | <1e-4 | sl10858 | G0:0017111 | 0.0589 |
| sl10436  | G0:0009394 | <1e-4 | slr5013  | G0:0009059 | <1e-4 | sl11773 | G0:0015293 | <1e-4 | slr0872 | G0:0044446 | <1e-4 | ssl6092 | G0:0017111 | 0.0589 |
| slr1667  | G0:0019222 | <1e-4 | slr1206  | G0:0008150 | <1e-4 | sl11054 | G0:0022857 | <1e-4 | slr1652 | G0:0044424 | <1e-4 | ssr2972 | G0:0017111 | 0.0589 |
| sl11749  | G0:0042451 | <1e-4 | slr2025  | G0:0006753 | <1e-4 | ssl8028 | G0:0022838 | <1e-4 | sl11737 | G0:0044425 | <1e-4 | ssl7021 | G0:0017111 | 0.0589 |
| sm10011  | G0:0046907 | <1e-4 | sl11006  | G0:0006082 | <1e-4 | slr1301 | G0:0015405 | <1e-4 | sl11203 | G0:0044464 | <1e-4 | slr1915 | G0:0017111 | 0.0589 |
| sl10847  | G0:0048878 | <1e-4 | sl11509  | G0:0072522 | <1e-4 | slr6067 | G0:0016462 | <1e-4 | slr1150 | G0:0005575 | <1e-4 | slr0498 | G0:0017111 | 0.0589 |
| sl11095  | G0:0034641 | <1e-4 | slr1668  | G0:0072528 | <1e-4 | sl10071 | G0:0016818 | <1e-4 | ssl2065 | G0:0044422 | <1e-4 | slr0948 | G0:0017111 | 0.0589 |
| slr0145  | G0:0043412 | <1e-4 | sl10888  | G0:0009117 | <1e-4 | sl10585 | G0:0016462 | <1e-4 | ssl2971 | G0:0044424 | <1e-4 | sl10160 | G0:0017111 | 0.0589 |
| slr0374  | G0:0045184 | <1e-4 | ssr1768  | G0:0022607 | <1e-4 | sl15061 | G0:0003674 | <1e-4 | slr6090 | G0:0005575 | <1e-4 | slr0269 | G0:0017111 | 0.0589 |
| sl15069  | G0:0016054 | <1e-4 | sl11131  | G0:0010556 | <1e-4 | ssr2554 | G0:0015291 | <1e-4 | sl10101 | G0:0044446 | <1e-4 | ssr1425 | G0:0017111 | 0.0589 |
| slr1056  | G0:0048523 | <1e-4 | slr0458  | G0:0072524 | <1e-4 | slr0981 | G0:0008171 | <1e-4 | sl10939 | G0:0044446 | <1e-4 | slr0181 | G0:0017111 | 0.0589 |
| ssr1114  | G0:0009123 | <1e-4 | ssl5103  | G0:0048523 | <1e-4 | sl10678 | G0:0022890 | <1e-4 | ssl5091 | G0:0043226 | <1e-4 | ssr3402 | G0:0017111 | 0.0589 |
| slr0092  | G0:0006576 | <1e-4 | sl10314  | G0:0043436 | <1e-4 | ssl3549 | G0:0022892 | <1e-4 | slr1189 | G0:0044444 | <1e-4 | sl10394 | G0:0017111 | 0.0589 |
| slr5111  | G0:0019222 | <1e-4 | slr0147  | G0:0051234 | <1e-4 | slr0243 | G0:0015077 | <1e-4 | slr0981 | G0:0044464 | <1e-4 | slr6028 | G0:0017111 | 0.0589 |
| sl11218  | G0:0008150 | <1e-4 | ssl1923  | G0:0051234 | <1e-4 | sl11954 | G0:0016462 | <1e-4 | sl10406 | G0:0044444 | <1e-4 | slr1670 | G0:0017111 | 0.0589 |
| slr6038  | G0:0055086 | <1e-4 | slr1812  | G0:0034660 | <1e-4 | slr1177 | G0:0043167 | <1e-4 | sl11315 | G0:0044422 | <1e-4 | sl15089 | G0:0017111 | 0.0589 |
| slr7015  | G0:0034641 | <1e-4 | sl11061  | G0:0043549 | <1e-4 | ssr2553 | G0:0015405 | <1e-4 | sl11738 | G0:0044424 | <1e-4 | ssl1263 | G0:0017111 | 0.0589 |
| ssl5114  | G0:0046907 | <1e-4 | slr0325  | G0:0006720 | <1e-4 | slr1927 | G0:0016818 | <1e-4 | slr1353 | G0:0043226 | <1e-4 | ssr0657 | G0:0017111 | 0.0589 |
| slr1918  | G0:0009987 | <1e-4 | sl11949  | G0:0050789 | <1e-4 | slr1816 | G0:0022803 | <1e-4 | sl10602 | G0:0043226 | <1e-4 | sl11940 | G0:0017111 | 0.0589 |
| ssl1046  | G0:0071554 | <1e-4 | slr0605  | G0:0006721 | <1e-4 | slr2018 | G0:0022838 | <1e-4 | slr0596 | G0:0005575 | <1e-4 | slr0521 | G0:0017111 | 0.0589 |
| slr0689  | G0:0051716 | <1e-4 | slr1195  | G0:0044106 | <1e-4 | sl11757 | G0:0022857 | <1e-4 | ssr1765 | G0:0005575 | <1e-4 | sl10691 | G0:0017111 | 0.0589 |
| slr0169  | G0:0044003 | <1e-4 | slr0199  | G0:0006732 | <1e-4 | sl11722 | G0:0015405 | <1e-4 | sl10103 | G0:0044422 | <1e-4 | slr6088 | G0:0017111 | 0.0589 |
| slr1177  | G0:0043170 | <1e-4 | slr7010  | G0:0051171 | <1e-4 | sl10283 | G0:0015267 | <1e-4 | sl15062 | G0:0044422 | <1e-4 | sl11640 | G0:0017111 | 0.0589 |
| sl117034 | G0:0005996 | <1e-4 | sl17063  | G0:0009893 | <1e-4 | slr1142 | G0:0022836 | <1e-4 | sl10513 | G0:0044464 | <1e-4 | ssr5011 | G0:0017111 | 0.0589 |
| ssl3142  | G0:0046164 | <1e-4 | slr2101  | G0:0043549 | <1e-4 | sl15033 | G0:0016462 | <1e-4 | slr1069 | G0:0044422 | <1e-4 | ssr5074 | G0:0017111 | 0.0589 |
| sl10369  | G0:0034660 | <1e-4 | sl10931  | G0:0009987 | <1e-4 | slr0313 | G0:0015399 | <1e-4 | slr1778 | G0:0005575 | <1e-4 | sl11681 | G0:0017111 | 0.0589 |
| sl15034  | G0:0065007 | <1e-4 | slr1704  | G0:0046907 | <1e-4 | slr1659 | G0:0015399 | <1e-4 | slr0397 | G0:0044446 | <1e-4 | slr1601 | G0:0017111 | 0.0589 |
| slr1047  | G0:0050801 | <1e-4 | sl10647  | G0:0010468 | <1e-4 | sl10328 | G0:0022832 | <1e-4 | sl11063 | G0:0044444 | <1e-4 | sl11285 | G0:0017111 | 0.0589 |
| slr1674  | G0:0006811 | <1e-4 | slr0392  | G0:0052111 | <1e-4 | slr1970 | G0:0016741 | <1e-4 | slr0751 | G0:0044422 | <1e-4 | sl11785 | G0:0017111 | 0.0589 |
| sl117033 | G0:0009165 | <1e-4 | sl110925 | G0:0001932 | <1e-4 | sl11251 | G0:0022892 | <1e-4 | slr0980 | G0:0043226 | <1e-4 | sl10031 | G0:0017111 | 0.0589 |
| ssl1378  | G0:0009260 | <1e-4 | slr6006  | G0:0009199 | <1e-4 | ssl2807 | G0:0022857 | <1e-4 | slr0978 | G0:0005575 | <1e-4 | slr1170 | G0:0017111 | 0.0589 |
| slr1196  | G0:0051716 | <1e-4 | ssr2067  | G0:0048518 | <1e-4 | sl10586 | G0:0022891 | <1e-4 | slr0208 | G0:0044444 | <1e-4 | slr0888 | G0:0017111 | 0.0589 |
| slr0291  | G0:0042455 | <1e-4 | sl11086  | G0:0009161 | <1e-4 | slr7083 | G0:0015077 | <1e-4 | ssl0242 | G0:0044446 | <1e-4 | sl10839 | G0:0017111 | 0.0589 |
| sl11414  | G0:0051171 | <1e-4 | sl11396  | G0:0044248 | <1e-4 | sl10309 | G0:0022838 | <1e-4 | slr6044 | G0:0044425 | <1e-4 | slr5024 | G0:0017111 | 0.0589 |
| slr6014  | G0:0031323 | <1e-4 | ssr1391  | G0:0009199 | <1e-4 | slr6016 | G0:0022838 | <1e-4 | slr0605 | G0:0005575 | <1e-4 | slr0967 | G0:0017111 | 0.0589 |
| slr0468  | G0:0042455 | <1e-4 | slr6104  | G0:0048518 | <1e-4 | ssl7007 | G0:0022803 | <1e-4 | sl11160 | G0:0044444 | <1e-4 | slr0637 | G0:0017111 | 0.0589 |
| slr0601  | G0:0008610 | <1e-4 | sl17064  | G0:0051246 | <1e-4 | ssr7084 | G0:0022890 | <1e-4 | sl17065 | G0:0044444 | <1e-4 | sl17069 | G0:0017111 | 0.0589 |
| sl10898  | G0:0009987 | <1e-4 | ssr0109  | G0:0043648 | <1e-4 | sl10783 | G0:0016818 | <1e-4 | ssr2843 | G0:0005575 | <1e-4 | sl11106 | G0:0017111 | 0.0589 |
| slr1122  | G0:0001932 | <1e-4 | sl15046  | G0:0044282 | <1e-4 | ssr1528 | G0:0022890 | <1e-4 | sl18032 | G0:0044425 | <1e-4 | sl10069 | G0:0017111 | 0.0589 |
| slr1601  | G0:0009263 | <1e-4 | slr2004  | G0:0019751 | <1e-4 | slr0907 | G0:0022803 | <1e-4 | slr0232 | G0:0044424 | <1e-4 | slr0670 | G0:0017111 | 0.0589 |
| sl10564  | G0:0010468 | <1e-4 | ssr1558  | G0:0044281 | <1e-4 | sl11151 | G0:0016746 | <1e-4 | ssl1498 | G0:0044424 | <1e-4 | slr5112 | G0:0017111 | 0.0589 |
| ssr6099  | G0:0043170 | <1e-4 | slr0634  | G0:0051716 | <1e-4 | slr1935 | G0:0016462 | <1e-4 | slr0145 | G0:0044444 | <1e-4 | ssl5068 | G0:0017111 | 0.0589 |
| slr7081  | G0:0010468 | <1e-4 | slr1611  | G0:0051188 | <1e-4 | slr1162 | G0:0022890 | <1e-4 | sl11915 | G0:0044444 | <1e-4 | sl10678 | G0:0017111 | 0.0589 |
| slr1045  | G0:0065007 | <1e-4 | slr0610  | G0:0010556 | <1e-4 | sl10645 | G0:0043492 | <1e-4 | slr1385 | G0:0044425 | <1e-4 | ssl2971 | G0:0017111 | 0.0589 |
| slr1807  | G0:0048518 | <1e-4 | slr1173  | G0:0051234 | <1e-4 | ssr1391 | G0:0016817 | <1e-4 | slr0957 | G0:0044464 | <1e-4 | slr0728 | G0:0017111 | 0.0589 |
| sl10162  | G0:0019752 | <1e-4 | sl17064  | G0:0071496 | <1e-4 | sl11272 | G0:0015291 | <1e-4 | sl11247 | G0:0005575 | <1e-4 | slr0516 | G0:0017111 | 0.0589 |
| sl11769  | G0:0033013 | <1e-4 | sl11913  | G0:0044106 | <1e-4 | ssr1407 | G0:0016741 | <1e-4 | slr0592 | G0:0044424 | <1e-4 | sl11570 | G0:0017111 | 0.0589 |
| slr1885  | G0:0065007 | <1e-4 | sl11698  | G0:0051186 | <1e-4 | slr0519 | G0:0060089 | <1e-4 | slr1676 | G0:0044424 | <1e-4 | ssl6061 | G0:0017111 | 0.0589 |
| slr0109  | G0:0005996 | <1e-4 | slr1568  | G0:0009142 | <1e-4 | sl17086 | G0:0016741 | <1e-4 | sl11571 | G0:0044424 | <1e-4 | ssr0336 | G0:0017111 | 0.0589 |

|         |            |       |          |            |       |         |            |       |         |            |       |         |            |        |
|---------|------------|-------|----------|------------|-------|---------|------------|-------|---------|------------|-------|---------|------------|--------|
| sl10590 | G0:0019752 | <1e-4 | sl11906  | G0:0006631 | <1e-4 | sl11832 | G0:0016746 | <1e-4 | sl16054 | G0:0005575 | <1e-4 | ss15091 | G0:0017111 | 0.0589 |
| slr1935 | G0:0006066 | <1e-4 | slr1577  | G0:0071840 | <1e-4 | ssr2553 | G0:0022832 | <1e-4 | sl10691 | G0:0005575 | <1e-4 | slr0709 | G0:0017111 | 0.0589 |
| ss15096 | G0:0042180 | <1e-4 | sl10479  | G0:0031326 | <1e-4 | sl10623 | G0:0016746 | <1e-4 | sl11608 | G0:0044444 | <1e-4 | slr7071 | G0:0017111 | 0.0589 |
| sl10804 | G0:0009124 | <1e-4 | slr0333  | G0:0051179 | <1e-4 | sl11446 | G0:0022891 | <1e-4 | slr1618 | G0:0044446 | <1e-4 | ssr6089 | G0:0017111 | 0.0589 |
| sl11785 | G0:0042180 | <1e-4 | slr1188  | G0:0051179 | <1e-4 | slr6067 | G0:0016741 | <1e-4 | sl11068 | G0:0044424 | <1e-4 | sl11095 | G0:0017111 | 0.0589 |
| slr0870 | G0:0048522 | <1e-4 | sl10188  | G0:0009117 | <1e-4 | ss10410 | G0:0015399 | <1e-4 | slr1815 | G0:0044425 | <1e-4 | sl11476 | G0:0017111 | 0.0589 |
| slr1809 | G0:0048522 | <1e-4 | sl11632  | G0:0009124 | <1e-4 | sl17031 | G0:0015293 | <1e-4 | sl11455 | G0:0044446 | <1e-4 | slr6091 | G0:0017111 | 0.0589 |
| sl17055 | G0:0060255 | <1e-4 | sl10047  | G0:0043648 | <1e-4 | slr0742 | G0:0015293 | <1e-4 | sl11938 | G0:0044422 | <1e-4 | slr0453 | G0:0017111 | 0.0589 |
| sl11882 | G0:0009263 | <1e-4 | slr1648  | G0:0050794 | <1e-4 | sl10982 | G0:0043167 | <1e-4 | slr0692 | G0:0044422 | <1e-4 | ss17051 | G0:0017111 | 0.0589 |
| slr0392 | G0:0042180 | <1e-4 | sl11267  | G0:0008610 | <1e-4 | sl15089 | G0:0015075 | <1e-4 | ssr0761 | G0:0044464 | <1e-4 | slr0397 | G0:0017111 | 0.0589 |
| slr6049 | G0:0019752 | <1e-4 | ss10242  | G0:0010556 | <1e-4 | slr0169 | G0:0016817 | <1e-4 | sl15063 | G0:0044425 | <1e-4 | sl17067 | G0:0017111 | 0.0589 |
| sl10266 | G0:0009308 | <1e-4 | slr6106  | G0:0043648 | <1e-4 | ss15091 | G0:0008171 | <1e-4 | sl10508 | G0:0043226 | <1e-4 | sl17078 | G0:0017111 | 0.0589 |
| sl11162 | G0:0009117 | <1e-4 | slr1128  | G0:0009889 | <1e-4 | slr0818 | G0:0015267 | <1e-4 | ssr6020 | G0:0044424 | <1e-4 | ss12162 | G0:0017111 | 0.0589 |
| sl11858 | G0:0048518 | <1e-4 | sl10361  | G0:0042451 | <1e-4 | sl10414 | G0:0008171 | <1e-4 | slr0742 | G0:0044446 | <1e-4 | slr0645 | G0:0017111 | 0.0589 |
| slr7058 | G0:0009308 | <1e-4 | slr0784  | G0:0071554 | <1e-4 | slr6005 | G0:0015267 | <1e-4 | slr1704 | G0:0005575 | <1e-4 | slr2003 | G0:0017111 | 0.0589 |
| slr7081 | G0:0060255 | <1e-4 | slr6016  | G0:0009057 | <1e-4 | slr6090 | G0:0015399 | <1e-4 | slr1677 | G0:0044464 | <1e-4 | sl10670 | G0:0017111 | 0.0589 |
| slr1353 | G0:0065007 | <1e-4 | ss16035  | G0:0046164 | <1e-4 | sl10252 | G0:0022836 | <1e-4 | sl16053 | G0:0044444 | <1e-4 | slr5101 | G0:0017111 | 0.0589 |
| sl10174 | G0:0051347 | <1e-4 | ssr5106  | G0:0043933 | <1e-4 | slr0305 | G0:0015399 | <1e-4 | slr0388 | G0:0044425 | <1e-4 | slr0313 | G0:0017111 | 0.0589 |
| slr1415 | G0:0046128 | <1e-4 | sl11071  | G0:0051818 | <1e-4 | sl10780 | G0:0022890 | <1e-4 | sl18007 | G0:0044446 | <1e-4 | sl11131 | G0:0017111 | 0.0589 |
| sl10283 | G0:0051716 | <1e-4 | slr6071  | G0:0009991 | <1e-4 | sl10811 | G0:0015291 | <1e-4 | sl10359 | G0:0044464 | <1e-4 | sl11321 | G0:0017111 | 0.0589 |
| slr0103 | G0:0019219 | <1e-4 | slr6049  | G0:0051179 | <1e-4 | sl11442 | G0:0003674 | <1e-4 | sl10488 | G0:0043226 | <1e-4 | sl11254 | G0:0017111 | 0.0589 |
| sl10023 | G0:0006721 | <1e-4 | slr0602  | G0:0019751 | <1e-4 | slr1484 | G0:0022832 | <1e-4 | ss12148 | G0:0005575 | <1e-4 | ssr3129 | G0:0017111 | 0.0589 |
| sl11965 | G0:0006066 | <1e-4 | slr7011  | G0:0046483 | <1e-4 | slr1613 | G0:0060089 | <1e-4 | slr0780 | G0:0044444 | <1e-4 | slr1474 | G0:0017111 | 0.0589 |
| slr1053 | G0:0072528 | <1e-4 | sl11267  | G0:0006793 | <1e-4 | sl11751 | G0:0016818 | <1e-4 | sl11763 | G0:0005575 | <1e-4 | slr5126 | G0:0017111 | 0.0589 |
| slr0049 | G0:0072524 | <1e-4 | sl10066  | G0:0006631 | <1e-4 | ssr1407 | G0:0016746 | <1e-4 | ss11972 | G0:0044425 | <1e-4 | sl10372 | G0:0017111 | 0.0589 |
| ssr6062 | G0:0043933 | <1e-4 | slr0250  | G0:0052111 | <1e-4 | ss15031 | G0:0015077 | <1e-4 | slr1999 | G0:0044425 | <1e-4 | sl10765 | G0:0017111 | 0.0589 |
| sl10871 | G0:0043933 | <1e-4 | sl10930  | G0:0006811 | <1e-4 | sl11089 | G0:0008171 | <1e-4 | sl11696 | G0:0005575 | <1e-4 | sl10230 | G0:0017111 | 0.0589 |
| sl11060 | G0:0044003 | <1e-4 | sl11738  | G0:0009117 | <1e-4 | sl11752 | G0:0016818 | <1e-4 | sl10103 | G0:0005575 | <1e-4 | slr0039 | G0:0017111 | 0.0589 |
| slr1998 | G0:0009308 | <1e-4 | sl11388  | G0:0034660 | <1e-4 | sl10446 | G0:0060089 | <1e-4 | ssr0102 | G0:0005575 | <1e-4 | ssr6002 | G0:0017111 | 0.0589 |
| slr1778 | G0:0010556 | <1e-4 | slr1864  | G0:0009260 | <1e-4 | sl10614 | G0:0043492 | <1e-4 | slr1162 | G0:0044446 | <1e-4 | slr1327 | G0:0017111 | 0.0589 |
| ss15103 | G0:0072524 | <1e-4 | slr0169  | G0:0045184 | <1e-4 | slr1566 | G0:0042623 | <1e-4 | slr7082 | G0:0005575 | <1e-4 | slr8022 | G0:0017111 | 0.0589 |
| slr1519 | G0:0060255 | <1e-4 | sl11217  | G0:0051234 | <1e-4 | slr1276 | G0:0042623 | <1e-4 | sl11500 | G0:0044425 | <1e-4 | slr5073 | G0:0017111 | 0.0589 |
| sg10002 | G0:0042180 | <1e-4 | slr0480  | G0:0006576 | <1e-4 | sl11352 | G0:0060089 | <1e-4 | sl11510 | G0:0044444 | <1e-4 | slr1875 | G0:0017111 | 0.0589 |
| ss12814 | G0:0048519 | <1e-4 | sl15030  | G0:0044275 | <1e-4 | slr1235 | G0:0043167 | <1e-4 | slr6064 | G0:0005575 | <1e-4 | slr0270 | G0:0017111 | 0.0589 |
| sl11307 | G0:0009126 | <1e-4 | ssr2848  | G0:0009141 | <1e-4 | slr0610 | G0:0008171 | <1e-4 | slr1533 | G0:0043226 | <1e-4 | slr1807 | G0:0017111 | 0.0589 |
| sl10048 | G0:0006733 | <1e-4 | slr7059  | G0:0016054 | <1e-4 | sl11004 | G0:0015399 | <1e-4 | slr0592 | G0:0044422 | <1e-4 | slr1866 | G0:0003723 | 0.0584 |
| slr1290 | G0:0034654 | <1e-4 | sl15034  | G0:0006793 | <1e-4 | ss11918 | G0:0016818 | <1e-4 | slr0076 | G0:0043226 | <1e-4 | sl10148 | G0:0003723 | 0.0584 |
| sl11563 | G0:0009889 | <1e-4 | sl17089  | G0:0060255 | <1e-4 | ssr3300 | G0:0008171 | <1e-4 | sl11024 | G0:0005575 | <1e-4 | sl10274 | G0:0003723 | 0.0584 |
| sl17050 | G0:0050789 | <1e-4 | sl110585 | G0:0044255 | <1e-4 | slr0092 | G0:0016818 | <1e-4 | slr1591 | G0:0044444 | <1e-4 | slr1066 | G0:0003723 | 0.0584 |
| ssr2551 | G0:0009987 | <1e-4 | slr5017  | G0:0072527 | <1e-4 | sl10443 | G0:0022836 | <1e-4 | ss17021 | G0:0044424 | <1e-4 | sl10096 | G0:0003723 | 0.0584 |
| ssr3154 | G0:0051188 | <1e-4 | slr0692  | G0:0034641 | <1e-4 | slr0440 | G0:0015399 | <1e-4 | slr1097 | G0:0005575 | <1e-4 | slr1519 | G0:0003723 | 0.0584 |
| slr6075 | G0:0044260 | <1e-4 | sl10381  | G0:0006091 | <1e-4 | slr2012 | G0:0022832 | <1e-4 | slr5101 | G0:0044444 | <1e-4 | sl11426 | G0:0003723 | 0.0584 |
| slr1507 | G0:0006766 | <1e-4 | slr1045  | G0:0048519 | <1e-4 | sl15130 | G0:0015291 | <1e-4 | slr0050 | G0:0044424 | <1e-4 | sl10547 | G0:0003723 | 0.0584 |
| slr1762 | G0:0072524 | <1e-4 | sl15128  | G0:0044248 | <1e-4 | ss13142 | G0:0016746 | <1e-4 | slr0712 | G0:0043226 | <1e-4 | slr1900 | G0:0003723 | 0.0584 |
| slr0196 | G0:0009889 | <1e-4 | sl10656  | G0:0042180 | <1e-4 | ss11377 | G0:0022838 | <1e-4 | sl11424 | G0:0044425 | <1e-4 | slr0209 | G0:0003723 | 0.0584 |
| ssr2975 | G0:0010556 | <1e-4 | sl15097  | G0:0044260 | <1e-4 | sl11380 | G0:0003674 | <1e-4 | ssr0759 | G0:0044444 | <1e-4 | sl10499 | G0:0003723 | 0.0584 |
| slr0442 | G0:0022411 | <1e-4 | sl11784  | G0:0042455 | <1e-4 | sl17043 | G0:0022891 | <1e-4 | slr1150 | G0:0044444 | <1e-4 | slr1918 | G0:0003723 | 0.0584 |
| ss15064 | G0:0022411 | <1e-4 | sl10783  | G0:0051188 | <1e-4 | sl11696 | G0:0016462 | <1e-4 | sl10060 | G0:0044464 | <1e-4 | sl10854 | G0:0003723 | 0.0584 |
| sl10863 | G0:0044106 | <1e-4 | slr6007  | G0:0046164 | <1e-4 | slr1600 | G0:0015077 | <1e-4 | slr0196 | G0:0005575 | <1e-4 | sl12006 | G0:0003723 | 0.0584 |
| slr0039 | G0:0043648 | <1e-4 | sl10309  | G0:0009057 | <1e-4 | slr2111 | G0:0015077 | <1e-4 | slr6038 | G0:0044444 | <1e-4 | sl11455 | G0:0003723 | 0.0584 |
| slr1541 | G0:0019637 | <1e-4 | slr0476  | G0:0009057 | <1e-4 | slr1611 | G0:0016817 | <1e-4 | ssr6085 | G0:0044444 | <1e-4 | slr1025 | G0:0003723 | 0.0584 |
| slr1415 | G0:0019637 | <1e-4 | slr2025  | G0:0010468 | <1e-4 | slr0304 | G0:0015267 | <1e-4 | ss12595 | G0:0044425 | <1e-4 | sl10360 | G0:0003723 | 0.0584 |
| slr1161 | G0:0009394 | <1e-4 | slr1774  | G0:0009199 | <1e-4 | slr0592 | G0:0015293 | <1e-4 | slr1493 | G0:0005575 | <1e-4 | ssr1375 | G0:0003723 | 0.0584 |
| slr0667 | G0:0034654 | <1e-4 | sl15130  | G0:0051188 | <1e-4 | slr0708 | G0:0015077 | <1e-4 | slr0038 | G0:0044446 | <1e-4 | sl11942 | G0:0003723 | 0.0584 |



|         |            |       |         |            |       |         |            |       |         |            |       |         |            |        |
|---------|------------|-------|---------|------------|-------|---------|------------|-------|---------|------------|-------|---------|------------|--------|
| slr1624 | G0:0051246 | <1e-4 | s111068 | G0:0009259 | <1e-4 | ss12733 | G0:0022857 | <1e-4 | slr8044 | G0:0005575 | <1e-4 | ss10109 | G0:0003723 | 0.0584 |
| slr1222 | G0:0009126 | <1e-4 | slr0935 | G0:0009262 | <1e-4 | slr1025 | G0:0015291 | <1e-4 | s110872 | G0:0005575 | <1e-4 | slr1612 | G0:0003723 | 0.0584 |
| slr0147 | G0:0009150 | <1e-4 | s111089 | G0:0009260 | <1e-4 | s115128 | G0:0016741 | <1e-4 | slr6103 | G0:0005575 | <1e-4 | s111586 | G0:0003723 | 0.0584 |
| ssr5011 | G0:0044281 | <1e-4 | slr1681 | G0:0048878 | <1e-4 | ssr1558 | G0:0015405 | <1e-4 | slr1241 | G0:0005575 | <1e-4 | slr1083 | G0:0003723 | 0.0584 |
| s111722 | G0:0046128 | <1e-4 | s110552 | G0:0006066 | <1e-4 | s110447 | G0:0015293 | <1e-4 | slr1168 | G0:0044444 | <1e-4 | s111219 | G0:0003723 | 0.0584 |
| slr1363 | G0:0042451 | <1e-4 | s110676 | G0:0008610 | <1e-4 | s111509 | G0:0022838 | <1e-4 | slr1417 | G0:0043226 | <1e-4 | slr1557 | G0:0003723 | 0.0584 |
| s111350 | G0:0051818 | <1e-4 | slr1266 | G0:0046128 | <1e-4 | slr0821 | G0:0060089 | <1e-4 | s111469 | G0:0005575 | <1e-4 | s111934 | G0:0003723 | 0.0584 |
| ss13615 | G0:0019751 | <1e-4 | slr1809 | G0:0046394 | <1e-4 | s111722 | G0:0005342 | <1e-4 | slr1162 | G0:0044425 | <1e-4 | slr1391 | G0:0003723 | 0.0584 |
| s111142 | G0:0006720 | <1e-4 | s110740 | G0:0046164 | <1e-4 | slr5102 | G0:0016746 | <1e-4 | s110447 | G0:0044422 | <1e-4 | slr1084 | G0:0004871 | 0.0582 |
| s110397 | G0:0034660 | <1e-4 | s110788 | G0:0045184 | <1e-4 | slr0680 | G0:0015399 | <1e-4 | s110281 | G0:0044422 | <1e-4 | s110381 | G0:0004871 | 0.0582 |
| slr1674 | G0:0006631 | <1e-4 | s110176 | G0:0051171 | <1e-4 | slr1032 | G0:0022890 | <1e-4 | s111939 | G0:0044464 | <1e-4 | s110982 | G0:0004871 | 0.0582 |
| slr1276 | G0:0044255 | <1e-4 | slr5023 | G0:0048523 | <1e-4 | s111151 | G0:0022857 | <1e-4 | ssr1951 | G0:0044464 | <1e-4 | slr2011 | G0:0004871 | 0.0582 |
| s110590 | G0:0009141 | <1e-4 | slr2103 | G0:0034641 | <1e-4 | s110803 | G0:0060089 | <1e-4 | s111214 | G0:0044424 | <1e-4 | s111965 | G0:0004871 | 0.0582 |
| slr2101 | G0:0072528 | <1e-4 | s118011 | G0:0006811 | <1e-4 | sg10001 | G0:0008171 | <1e-4 | slr0954 | G0:0043226 | <1e-4 | slr1913 | G0:0004871 | 0.0582 |
| slr7092 | G0:0048523 | <1e-4 | s111151 | G0:0009260 | <1e-4 | s111873 | G0:0016817 | <1e-4 | s111660 | G0:0044422 | <1e-4 | slr0482 | G0:0004871 | 0.0582 |
| slr0264 | G0:0022607 | <1e-4 | s111021 | G0:0031326 | <1e-4 | s111495 | G0:0022890 | <1e-4 | s110811 | G0:0005575 | <1e-4 | slr2122 | G0:0004871 | 0.0582 |
| ss17046 | G0:0022607 | <1e-4 | s110985 | G0:0044281 | <1e-4 | s110676 | G0:0022836 | <1e-4 | s111770 | G0:0044444 | <1e-4 | slr1203 | G0:0004871 | 0.0582 |
| ss12138 | G0:0046394 | <1e-4 | slr1819 | G0:0046164 | <1e-4 | slr0356 | G0:0043492 | <1e-4 | slr1035 | G0:0044464 | <1e-4 | s111954 | G0:0004871 | 0.0582 |
| slr1116 | G0:0006721 | <1e-4 | slr6090 | G0:0046164 | <1e-4 | slr1599 | G0:0015075 | <1e-4 | s110847 | G0:0044422 | <1e-4 | slr1073 | G0:0004871 | 0.0582 |
| ss11923 | G0:0072524 | <1e-4 | s110481 | G0:0006631 | <1e-4 | slr5023 | G0:0015291 | <1e-4 | s110740 | G0:0044422 | <1e-4 | slr1177 | G0:0004871 | 0.0582 |
| s111132 | G0:0048519 | <1e-4 | slr1117 | G0:0042180 | <1e-4 | s110445 | G0:0004872 | <1e-4 | slr1084 | G0:0005575 | <1e-4 | ssr3122 | G0:0004871 | 0.0582 |
| ss16061 | G0:0042455 | <1e-4 | ssr2803 | G0:0043412 | <1e-4 | s111925 | G0:0015291 | <1e-4 | slr1788 | G0:0044425 | <1e-4 | s111315 | G0:0004871 | 0.0582 |
| slr0299 | G0:0018130 | <1e-4 | s111757 | G0:0080090 | <1e-4 | ssr2553 | G0:0022891 | <1e-4 | s111769 | G0:0005575 | <1e-4 | slr0913 | G0:0004871 | 0.0582 |
| s111882 | G0:0018130 | <1e-4 | s111396 | G0:0052111 | <1e-4 | s110552 | G0:0016741 | <1e-4 | s110743 | G0:0005575 | <1e-4 | slr0845 | G0:0004871 | 0.0582 |
| slr6073 | G0:0009059 | <1e-4 | slr0709 | G0:0009059 | <1e-4 | s117089 | G0:0022890 | <1e-4 | ssr1698 | G0:0005575 | <1e-4 | slr0723 | G0:0004871 | 0.0582 |
| ssr5121 | G0:0042180 | <1e-4 | slr1442 | G0:0009892 | <1e-4 | s111217 | G0:0016741 | <1e-4 | s111532 | G0:0044424 | <1e-4 | slr1638 | G0:0004871 | 0.0582 |
| s110931 | G0:0006631 | <1e-4 | s110382 | G0:0006631 | <1e-4 | ssr1473 | G0:0015267 | <1e-4 | s110372 | G0:0043226 | <1e-4 | s110676 | G0:0004871 | 0.0582 |
| slr1866 | G0:0051716 | <1e-4 | slr7025 | G0:0009259 | <1e-4 | s118033 | G0:0016741 | <1e-4 | slr1668 | G0:0044425 | <1e-4 | slr1618 | G0:0004871 | 0.0582 |
| s118007 | G0:0044106 | <1e-4 | slr0962 | G0:0034641 | <1e-4 | ssr2317 | G0:0015077 | <1e-4 | s118004 | G0:0044444 | <1e-4 | s110237 | G0:0004871 | 0.0582 |
| slr0581 | G0:0071842 | <1e-4 | s116052 | G0:0005996 | <1e-4 | slr1753 | G0:0015293 | <1e-4 | slr0689 | G0:0043226 | <1e-4 | slr1964 | G0:0004871 | 0.0582 |
| s115062 | G0:0042451 | <1e-4 | ssr7035 | G0:0006576 | <1e-4 | ss18008 | G0:0043492 | <1e-4 | s110022 | G0:0044444 | <1e-4 | ssr2439 | G0:0004871 | 0.0582 |
| slr1866 | G0:0016052 | <1e-4 | s110172 | G0:0048878 | <1e-4 | slr1315 | G0:0015075 | <1e-4 | slr1495 | G0:0044424 | <1e-4 | s110944 | G0:0004871 | 0.0582 |
| slr1813 | G0:0048518 | <1e-4 | s110405 | G0:0044106 | <1e-4 | slr0695 | G0:0016817 | <1e-4 | ss17007 | G0:0044422 | <1e-4 | slr1854 | G0:0004871 | 0.0582 |
| s110703 | G0:0046164 | <1e-4 | s110160 | G0:0051234 | <1e-4 | s110577 | G0:0060089 | <1e-4 | s111191 | G0:0044464 | <1e-4 | slr1572 | G0:0004871 | 0.0582 |
| ss18028 | G0:0009123 | <1e-4 | s111939 | G0:0046128 | <1e-4 | slr5087 | G0:0003674 | <1e-4 | s111214 | G0:0044446 | <1e-4 | slr0192 | G0:0004871 | 0.0582 |
| ss15015 | G0:0034654 | <1e-4 | slr0729 | G0:0009056 | <1e-4 | s110044 | G0:0043167 | <1e-4 | s110545 | G0:0044424 | <1e-4 | s110355 | G0:0004871 | 0.0582 |
| s117062 | G0:0009394 | <1e-4 | slr0157 | G0:0044248 | <1e-4 | slr1070 | G0:0005342 | <1e-4 | s111095 | G0:0005575 | <1e-4 | slr0586 | G0:0004871 | 0.0582 |
| slr2092 | G0:0006720 | <1e-4 | slr5017 | G0:0042180 | <1e-4 | s110325 | G0:0022891 | <1e-4 | s115067 | G0:0005575 | <1e-4 | slr0386 | G0:0004871 | 0.0582 |
| slr0579 | G0:0006733 | <1e-4 | slr6091 | G0:0046164 | <1e-4 | slr0431 | G0:0005342 | <1e-4 | slr0702 | G0:0044425 | <1e-4 | s110532 | G0:0004871 | 0.0582 |
| s111722 | G0:0050794 | <1e-4 | slr1612 | G0:0071842 | <1e-4 | slr1619 | G0:0022892 | <1e-4 | s111834 | G0:0044446 | <1e-4 | ssr3571 | G0:0004871 | 0.0582 |
| ss17042 | G0:0001932 | <1e-4 | s111476 | G0:0031323 | <1e-4 | s110249 | G0:0022891 | <1e-4 | ssr6032 | G0:0044464 | <1e-4 | s110325 | G0:0004871 | 0.0582 |
| s117064 | G0:0016052 | <1e-4 | slr0482 | G0:0044271 | <1e-4 | s110284 | G0:0022892 | <1e-4 | slr0496 | G0:0044464 | <1e-4 | s111658 | G0:0004871 | 0.0582 |
| s111060 | G0:0044271 | <1e-4 | s111956 | G0:0009141 | <1e-4 | s115030 | G0:0015293 | <1e-4 | ssr2067 | G0:0044464 | <1e-4 | slr1230 | G0:0004871 | 0.0582 |
| s110062 | G0:0050896 | <1e-4 | slr5023 | G0:0044260 | <1e-4 | slr0588 | G0:0022891 | <1e-4 | s110853 | G0:0044444 | <1e-4 | slr1726 | G0:0003723 | 0.0568 |
| slr0582 | G0:0044281 | <1e-4 | s111135 | G0:0048878 | <1e-4 | s117065 | G0:0016818 | <1e-4 | slr0848 | G0:0044446 | <1e-4 | slr0514 | G0:0003723 | 0.0568 |
| ss12064 | G0:0043436 | <1e-4 | slr1187 | G0:0034641 | <1e-4 | s111573 | G0:0042623 | <1e-4 | s111532 | G0:0043226 | <1e-4 | slr0496 | G0:0003723 | 0.0568 |
| s116053 | G0:0010556 | <1e-4 | slr6049 | G0:0019637 | <1e-4 | s115090 | G0:0003674 | <1e-4 | ss13451 | G0:0005575 | <1e-4 | s110192 | G0:0003723 | 0.0568 |
| slr0272 | G0:0010468 | <1e-4 | s110488 | G0:0009150 | <1e-4 | slr1875 | G0:0022892 | <1e-4 | slr1681 | G0:0044444 | <1e-4 | s110822 | G0:0003723 | 0.0568 |
| slr1600 | G0:0051246 | <1e-4 | s110595 | G0:0009142 | <1e-4 | s117086 | G0:0015267 | <1e-4 | slr0885 | G0:0044464 | <1e-4 | slr0740 | G0:0003723 | 0.0568 |
| s110518 | G0:0050896 | <1e-4 | slr0111 | G0:0006732 | <1e-4 | slr0334 | G0:0022838 | <1e-4 | slr0407 | G0:0044424 | <1e-4 | slr0263 | G0:0003723 | 0.0568 |
| slr0551 | G0:0071840 | <1e-4 | s110909 | G0:0009308 | <1e-4 | slr2144 | G0:0016817 | <1e-4 | s110858 | G0:0044464 | <1e-4 | slr1098 | G0:0003723 | 0.0568 |
| s110678 | G0:0009165 | <1e-4 | s118004 | G0:0055086 | <1e-4 | slr0594 | G0:0015077 | <1e-4 | s111911 | G0:0044444 | <1e-4 | s110577 | G0:0003723 | 0.0568 |
| slr2103 | G0:0006631 | <1e-4 | slr1047 | G0:0046164 | <1e-4 | s111773 | G0:0022891 | <1e-4 | s110176 | G0:0044464 | <1e-4 | slr0589 | G0:0003723 | 0.0568 |
| slr7092 | G0:0009262 | <1e-4 | s110249 | G0:0051179 | <1e-4 | ssr1558 | G0:0015399 | <1e-4 | s110853 | G0:0044446 | <1e-4 | s110175 | G0:0003723 | 0.0568 |

|         |            |       |         |            |       |         |            |       |         |            |       |         |            |        |
|---------|------------|-------|---------|------------|-------|---------|------------|-------|---------|------------|-------|---------|------------|--------|
| sl10066 | G0:0009893 | <1e-4 | slr7037 | G0:0046164 | <1e-4 | sl11464 | G0:0003674 | <1e-4 | sl10443 | G0:0044444 | <1e-4 | slr1811 | G0:0003723 | 0.0568 |
| sl11939 | G0:0048878 | <1e-4 | sl10595 | G0:0009892 | <1e-4 | sl17028 | G0:0022803 | <1e-4 | sl11862 | G0:0044424 | <1e-4 | slr1143 | G0:0003723 | 0.0568 |
| slr0380 | G0:0009991 | <1e-4 | sl11191 | G0:0009987 | <1e-4 | slr1809 | G0:0016818 | <1e-4 | sl11373 | G0:0044422 | <1e-4 | slr1215 | G0:0009058 | 0.0562 |
| slr0358 | G0:0006082 | <1e-4 | slr1261 | G0:0050794 | <1e-4 | slr1896 | G0:0015075 | <1e-4 | ss13692 | G0:0044425 | <1e-4 | sl10252 | G0:0016787 | 0.0562 |
| sl11832 | G0:0006811 | <1e-4 | slr0496 | G0:0065007 | <1e-4 | slr1546 | G0:0022832 | <1e-4 | ss11520 | G0:0044422 | <1e-4 | slr1644 | G0:0017111 | 0.0554 |
| sl15033 | G0:0006732 | <1e-4 | slr0313 | G0:0050896 | <1e-4 | sl10372 | G0:0015293 | <1e-4 | sl16053 | G0:0005575 | <1e-4 | slr1431 | G0:0017111 | 0.0554 |
| sl10473 | G0:0009142 | <1e-4 | sl11265 | G0:0048522 | <1e-4 | ss11377 | G0:0015291 | <1e-4 | ss11923 | G0:0044424 | <1e-4 | ssr2142 | G0:0017111 | 0.0554 |
| slr1406 | G0:0022411 | <1e-4 | sl11486 | G0:0006766 | <1e-4 | sl10369 | G0:0015399 | <1e-4 | slr2037 | G0:0005575 | <1e-4 | sl10933 | G0:0003676 | 0.0553 |
| slr2103 | G0:0051347 | <1e-4 | slr1474 | G0:0051188 | <1e-4 | slr6029 | G0:0016818 | <1e-4 | sl10810 | G0:0044464 | <1e-4 | slr0588 | G0:0009058 | 0.0547 |
| sl10314 | G0:0031323 | <1e-4 | sl10241 | G0:0042451 | <1e-4 | sl10984 | G0:0015077 | <1e-4 | ss12162 | G0:0005575 | <1e-4 | slr0285 | G0:0009058 | 0.0547 |
| slr6051 | G0:0051347 | <1e-4 | slr1472 | G0:0019637 | <1e-4 | sl11049 | G0:0015291 | <1e-4 | sl18035 | G0:0044444 | <1e-4 | sl10736 | G0:0009058 | 0.0547 |
| slr0172 | G0:0019752 | <1e-4 | slr5118 | G0:0065007 | <1e-4 | sl10743 | G0:0015399 | <1e-4 | slr1815 | G0:0044464 | <1e-4 | sl10372 | G0:0009058 | 0.0547 |
| sl15030 | G0:0050801 | <1e-4 | slr1449 | G0:0009141 | <1e-4 | slr1025 | G0:0015267 | <1e-4 | sl11225 | G0:0044464 | <1e-4 | ssr0109 | G0:0009058 | 0.0547 |
| slr1236 | G0:0018130 | <1e-4 | slr0607 | G0:0046128 | <1e-4 | slr0172 | G0:0022891 | <1e-4 | slr1183 | G0:0005575 | <1e-4 | sl11926 | G0:0009058 | 0.0547 |
| sl11372 | G0:0006766 | <1e-4 | ssr2843 | G0:0034641 | <1e-4 | ssr2067 | G0:0005342 | <1e-4 | slr5013 | G0:0044444 | <1e-4 | slr0269 | G0:0009058 | 0.0547 |
| sl10545 | G0:0033013 | <1e-4 | slr0930 | G0:0051246 | <1e-4 | slr2115 | G0:0016462 | <1e-4 | sl15044 | G0:0044446 | <1e-4 | sl10608 | G0:0009058 | 0.0547 |
| slr1495 | G0:0042180 | <1e-4 | slr1819 | G0:0051188 | <1e-4 | slr1470 | G0:0015267 | <1e-4 | sl10266 | G0:0044424 | <1e-4 | sl10905 | G0:0009058 | 0.0547 |
| sl11511 | G0:0009893 | <1e-4 | sl11344 | G0:0055082 | <1e-4 | sl10980 | G0:0022891 | <1e-4 | slr1789 | G0:0044424 | <1e-4 | sl10858 | G0:0009058 | 0.0547 |
| slr1923 | G0:0051716 | <1e-4 | sl10192 | G0:0044106 | <1e-4 | sl10702 | G0:0060089 | <1e-4 | sl11160 | G0:0043226 | <1e-4 | slr1438 | G0:0009058 | 0.0547 |
| sl16054 | G0:0009165 | <1e-4 | sl10265 | G0:0019222 | <1e-4 | ss15007 | G0:0016746 | <1e-4 | sl11495 | G0:0005575 | <1e-4 | slr1935 | G0:0009058 | 0.0547 |
| ssr2142 | G0:0005976 | <1e-4 | slr0594 | G0:0043549 | <1e-4 | sl10867 | G0:0005342 | <1e-4 | slr6068 | G0:0043226 | <1e-4 | slr7091 | G0:0009058 | 0.0547 |
| slr0149 | G0:0009263 | <1e-4 | slr1613 | G0:0006576 | <1e-4 | slr1505 | G0:0042623 | <1e-4 | slr0634 | G0:0005575 | <1e-4 | sl10563 | G0:0009058 | 0.0547 |
| sl10023 | G0:0009132 | <1e-4 | slr1053 | G0:0048878 | <1e-4 | slr0667 | G0:0043492 | <1e-4 | ss11552 | G0:0005575 | <1e-4 | sl10625 | G0:0009058 | 0.0547 |
| sl11262 | G0:0018130 | <1e-4 | slr1572 | G0:0044003 | <1e-4 | slr0291 | G0:0022838 | <1e-4 | slr1816 | G0:0044446 | <1e-4 | slr0725 | G0:0009058 | 0.0547 |
| ss10353 | G0:0006720 | <1e-4 | ssr5120 | G0:0009126 | <1e-4 | ssr2060 | G0:0015293 | <1e-4 | sl11884 | G0:0043226 | <1e-4 | sl10069 | G0:0009058 | 0.0547 |
| slr7060 | G0:0006793 | <1e-4 | sl11586 | G0:0009057 | <1e-4 | slr0976 | G0:0016741 | <1e-4 | ss11263 | G0:0005575 | <1e-4 | sl11692 | G0:0009058 | 0.0547 |
| slr0345 | G0:0048523 | <1e-4 | slr0871 | G0:0008150 | <1e-4 | sl10141 | G0:0022832 | <1e-4 | slr0582 | G0:0044444 | <1e-4 | sl10482 | G0:0009058 | 0.0547 |
| sl10804 | G0:0051716 | <1e-4 | sl11135 | G0:0009260 | <1e-4 | slr1534 | G0:0022832 | <1e-4 | sl17031 | G0:0005575 | <1e-4 | sl11570 | G0:0009058 | 0.0547 |
| slr0912 | G0:0009142 | <1e-4 | ssr6086 | G0:0009056 | <1e-4 | ss11972 | G0:0022838 | <1e-4 | slr7081 | G0:0044424 | <1e-4 | slr1624 | G0:0009058 | 0.0547 |
| sl10762 | G0:0009124 | <1e-4 | slr5024 | G0:0016054 | <1e-4 | sl11372 | G0:0060089 | <1e-4 | slr0702 | G0:0044464 | <1e-4 | slr0013 | G0:0009058 | 0.0547 |
| sl11389 | G0:0006793 | <1e-4 | slr1752 | G0:0006811 | <1e-4 | slr0545 | G0:0016746 | <1e-4 | slr2052 | G0:0044464 | <1e-4 | sl11698 | G0:0009058 | 0.0547 |
| sl11004 | G0:0006811 | <1e-4 | sl17034 | G0:0006082 | <1e-4 | slr0199 | G0:0042623 | <1e-4 | slr0250 | G0:0005575 | <1e-4 | ss12384 | G0:0009058 | 0.0547 |
| slr1570 | G0:0031326 | <1e-4 | slr1790 | G0:0031323 | <1e-4 | sl11715 | G0:0005342 | <1e-4 | slr1052 | G0:0044446 | <1e-4 | sl18035 | G0:0009058 | 0.0547 |
| slr0971 | G0:0051818 | <1e-4 | sl11632 | G0:0042180 | <1e-4 | sl11344 | G0:0022838 | <1e-4 | sl11530 | G0:0005575 | <1e-4 | ss15091 | G0:0009058 | 0.0547 |
| slr1415 | G0:0046394 | <1e-4 | sl10479 | G0:0019219 | <1e-4 | sl10909 | G0:0015405 | <1e-4 | slr1599 | G0:0044424 | <1e-4 | slr0334 | G0:0009058 | 0.0547 |
| slr2084 | G0:0044275 | <1e-4 | ss11552 | G0:0043933 | <1e-4 | sl10412 | G0:0015405 | <1e-4 | sl11415 | G0:0044424 | <1e-4 | ssr1558 | G0:0009058 | 0.0547 |
| sl10645 | G0:0046483 | <1e-4 | slr0243 | G0:0016052 | <1e-4 | slr6067 | G0:0022832 | <1e-4 | sl15026 | G0:0044424 | <1e-4 | sl10678 | G0:0009058 | 0.0547 |
| sl11530 | G0:0009987 | <1e-4 | sl11232 | G0:0009199 | <1e-4 | slr1468 | G0:0015405 | <1e-4 | slr1270 | G0:0043226 | <1e-4 | ss11378 | G0:0009058 | 0.0547 |
| sl10913 | G0:0072521 | <1e-4 | sl11068 | G0:0044255 | <1e-4 | sl10269 | G0:0022891 | <1e-4 | ss15098 | G0:0044425 | <1e-4 | slr1807 | G0:0009058 | 0.0547 |
| slr1436 | G0:0072524 | <1e-4 | slr8044 | G0:0044281 | <1e-4 | slr1544 | G0:0022892 | <1e-4 | slr6013 | G0:0043226 | <1e-4 | sl10786 | G0:0009058 | 0.0547 |
| slr1644 | G0:0031323 | <1e-4 | slr0196 | G0:0009150 | <1e-4 | slr1790 | G0:0022890 | <1e-4 | ss10832 | G0:0044424 | <1e-4 | slr1056 | G0:0009058 | 0.0547 |
| slr1900 | G0:0009991 | <1e-4 | ssr2975 | G0:0006220 | <1e-4 | sl10449 | G0:0043492 | <1e-4 | ss10483 | G0:0005575 | <1e-4 | ss11918 | G0:0009058 | 0.0547 |
| slr0554 | G0:0044255 | <1e-4 | sl11761 | G0:0090304 | <1e-4 | sl10237 | G0:0022832 | <1e-4 | slr1915 | G0:0043226 | <1e-4 | ssr6099 | G0:0009058 | 0.0547 |
| slr0380 | G0:0018130 | <1e-4 | slr1726 | G0:0009142 | <1e-4 | sl11571 | G0:0043167 | <1e-4 | slr0668 | G0:0005575 | <1e-4 | sl10062 | G0:0009058 | 0.0547 |
| slr0243 | G0:0019362 | <1e-4 | sl11495 | G0:0071840 | <1e-4 | sl10565 | G0:0043492 | <1e-4 | slr0031 | G0:0044444 | <1e-4 | slr0582 | G0:0009058 | 0.0547 |
| slr1068 | G0:0006766 | <1e-4 | sl11505 | G0:0019751 | <1e-4 | sl10044 | G0:0043492 | <1e-4 | slr2048 | G0:0044444 | <1e-4 | slr0863 | G0:0009058 | 0.0547 |
| slr1196 | G0:0042455 | <1e-4 | sl10980 | G0:0016053 | <1e-4 | sl11691 | G0:0043167 | <1e-4 | sl10436 | G0:0044425 | <1e-4 | slr1789 | G0:0009058 | 0.0547 |
| sl11446 | G0:0044282 | <1e-4 | sl10586 | G0:0009142 | <1e-4 | slr1951 | G0:0016462 | <1e-4 | ssr1114 | G0:0005575 | <1e-4 | slr0948 | G0:0009058 | 0.0547 |
| slr0712 | G0:0009141 | <1e-4 | slr0709 | G0:0008610 | <1e-4 | slr0709 | G0:0022857 | <1e-4 | sl11267 | G0:0044446 | <1e-4 | sl11321 | G0:0009058 | 0.0547 |
| slr0930 | G0:0008150 | <1e-4 | slr1800 | G0:0019752 | <1e-4 | slr0919 | G0:0022832 | <1e-4 | sl10309 | G0:0044425 | <1e-4 | slr0397 | G0:0009058 | 0.0547 |
| ss12920 | G0:0009124 | <1e-4 | sl11586 | G0:0051171 | <1e-4 | sl10839 | G0:0043167 | <1e-4 | slr1152 | G0:0044444 | <1e-4 | sl10731 | G0:0009058 | 0.0547 |
| sl11671 | G0:0034654 | <1e-4 | sl17066 | G0:0046128 | <1e-4 | sl10376 | G0:0016462 | <1e-4 | slr1174 | G0:0043226 | <1e-4 | slr0416 | G0:0009058 | 0.0547 |
| sl15030 | G0:0051186 | <1e-4 | slr6039 | G0:0046128 | <1e-4 | sl11912 | G0:0015267 | <1e-4 | ssr6078 | G0:0044464 | <1e-4 | sl10839 | G0:0009058 | 0.0547 |
| ssr3154 | G0:0044260 | <1e-4 | sl10590 | G0:0009892 | <1e-4 | slr1702 | G0:0043167 | <1e-4 | ssr3304 | G0:0044425 | <1e-4 | slr1537 | G0:0009058 | 0.0547 |

|          |            |       |          |            |       |          |            |       |          |            |       |          |            |        |
|----------|------------|-------|----------|------------|-------|----------|------------|-------|----------|------------|-------|----------|------------|--------|
| sll1219  | G0:0042180 | <1e-4 | s1r6038  | G0:0009987 | <1e-4 | s1r1425  | G0:0022892 | <1e-4 | ssr6026  | G0:0005575 | <1e-4 | sll10252 | G0:0005215 | 0.053  |
| s1r1970  | G0:0009144 | <1e-4 | sll1692  | G0:0042451 | <1e-4 | sll1411  | G0:0015399 | <1e-4 | s1r0625  | G0:0005575 | <1e-4 | ssr1375  | G0:0004871 | 0.0529 |
| ssr1425  | G0:0006576 | <1e-4 | s1r0664  | G0:0072521 | <1e-4 | sll1681  | G0:0022803 | <1e-4 | s1r0658  | G0:0044424 | <1e-4 | sll1586  | G0:0004871 | 0.0529 |
| sll10444 | G0:0009057 | <1e-4 | sll1573  | G0:0009141 | <1e-4 | s1r2000  | G0:0016462 | <1e-4 | ss12749  | G0:0044422 | <1e-4 | s1r0876  | G0:0004871 | 0.0529 |
| s1r1535  | G0:0009150 | <1e-4 | s1r1854  | G0:0006631 | <1e-4 | ss17051  | G0:0016741 | <1e-4 | sll17075 | G0:0044422 | <1e-4 | s1r1127  | G0:0004871 | 0.0529 |
| sll10765 | G0:0005996 | <1e-4 | s1r7083  | G0:0009987 | <1e-4 | s1r1236  | G0:0016741 | <1e-4 | s1r0249  | G0:0044425 | <1e-4 | s1r0503  | G0:0004871 | 0.0529 |
| s1r1189  | G0:0051186 | <1e-4 | sll1307  | G0:0071841 | <1e-4 | sll10525 | G0:0043492 | <1e-4 | sll10419 | G0:0044422 | <1e-4 | ssr1698  | G0:0004871 | 0.0529 |
| s1r0455  | G0:0006720 | <1e-4 | sll15090 | G0:0010556 | <1e-4 | ss10787  | G0:0022890 | <1e-4 | ssr0109  | G0:0043226 | <1e-4 | sll12006 | G0:0004871 | 0.0529 |
| sll1252  | G0:0043549 | <1e-4 | s1r0668  | G0:0009309 | <1e-4 | s1r7016  | G0:0016741 | <1e-4 | s1r0442  | G0:0043226 | <1e-4 | sll1218  | G0:0004871 | 0.0529 |
| s1r1032  | G0:0072528 | <1e-4 | sll1359  | G0:0044255 | <1e-4 | s1r1385  | G0:0043167 | <1e-4 | s1r0598  | G0:0044422 | <1e-4 | sll10301 | G0:0004871 | 0.0529 |
| sll10678 | G0:0051246 | <1e-4 | s1r1788  | G0:0009056 | <1e-4 | ss13692  | G0:0022838 | <1e-4 | s1r6067  | G0:0044446 | <1e-4 | s1r1519  | G0:0004871 | 0.0529 |
| s1r1670  | G0:0018130 | <1e-4 | s1r0147  | G0:0048522 | <1e-4 | s1r6008  | G0:0022832 | <1e-4 | ssr2787  | G0:0044424 | <1e-4 | sll10508 | G0:0004871 | 0.0529 |
| sll11504 | G0:0022411 | <1e-4 | s1r0195  | G0:0009987 | <1e-4 | s1r1807  | G0:0022803 | <1e-4 | s1r1780  | G0:0005575 | <1e-4 | sll11433 | G0:0004871 | 0.0529 |
| sll11979 | G0:0006721 | <1e-4 | sll10328 | G0:0042451 | <1e-4 | sll11735 | G0:0016746 | <1e-4 | s1r1840  | G0:0044444 | <1e-4 | s1r2025  | G0:0004871 | 0.0529 |
| sll10198 | G0:0072522 | <1e-4 | sll1884  | G0:0009123 | <1e-4 | s1r1102  | G0:0005342 | <1e-4 | s1r0887  | G0:0044422 | <1e-4 | s1r1353  | G0:0004871 | 0.0529 |
| s1r1863  | G0:0060255 | <1e-4 | ss12717  | G0:0009308 | <1e-4 | s1r0317  | G0:0008171 | <1e-4 | s1r7099  | G0:0044425 | <1e-4 | s1r1107  | G0:0004871 | 0.0529 |
| s1r1173  | G0:0009262 | <1e-4 | s1r7097  | G0:0051347 | <1e-4 | s1r2110  | G0:0016817 | <1e-4 | sll11273 | G0:0044464 | <1e-4 | sll10743 | G0:0004871 | 0.0529 |
| sll15109 | G0:0006631 | <1e-4 | sll15109 | G0:0071842 | <1e-4 | ss17046  | G0:0015405 | <1e-4 | sll11119 | G0:0044464 | <1e-4 | sll10096 | G0:0004871 | 0.0529 |
| sll1272  | G0:0009263 | <1e-4 | s1r1657  | G0:0044275 | <1e-4 | sll10933 | G0:0016817 | <1e-4 | s1r0637  | G0:0005575 | <1e-4 | s1r1045  | G0:0004871 | 0.0529 |
| s1r0195  | G0:0044281 | <1e-4 | s1r1611  | G0:0050896 | <1e-4 | s1r2110  | G0:0022838 | <1e-4 | sll10735 | G0:0005575 | <1e-4 | sll10447 | G0:0004871 | 0.0529 |
| s1r1070  | G0:0009142 | <1e-4 | sll1036  | G0:0009132 | <1e-4 | s1r1104  | G0:0016818 | <1e-4 | s1r1618  | G0:0005575 | <1e-4 | s1r1025  | G0:0004871 | 0.0529 |
| s1r0300  | G0:0055082 | <1e-4 | s1r6071  | G0:0019222 | <1e-4 | sll10294 | G0:0043492 | <1e-4 | sll18001 | G0:0044444 | <1e-4 | s1r1557  | G0:0004871 | 0.0529 |
| sll10691 | G0:0048518 | <1e-4 | ssr1425  | G0:0010468 | <1e-4 | s1r1702  | G0:0022838 | <1e-4 | ss12064  | G0:0044464 | <1e-4 | s1r1194  | G0:0004871 | 0.0529 |
| s1r0610  | G0:0045184 | <1e-4 | s1r0423  | G0:0046907 | <1e-4 | s1r1102  | G0:0015291 | <1e-4 | s1r1045  | G0:0044425 | <1e-4 | s1r1612  | G0:0004871 | 0.0529 |
| sll10096 | G0:0001932 | <1e-4 | sll10423 | G0:0044282 | <1e-4 | ssr2067  | G0:0015399 | <1e-4 | s1r0207  | G0:0044446 | <1e-4 | sll10445 | G0:0017111 | 0.0527 |
| s1r0264  | G0:0044255 | <1e-4 | s1r1944  | G0:0009889 | <1e-4 | sll11071 | G0:0015293 | <1e-4 | sll10413 | G0:0043226 | <1e-4 | sll10641 | G0:0017111 | 0.0527 |
| s1r0980  | G0:0009259 | <1e-4 | ss12733  | G0:0044275 | <1e-4 | s1r0108  | G0:0015293 | <1e-4 | s1r0287  | G0:0044464 | <1e-4 | sll10985 | G0:0016787 | 0.0526 |
| ssr0332  | G0:0009165 | <1e-4 | ss13829  | G0:0042180 | <1e-4 | s1r0941  | G0:0008171 | <1e-4 | ssr5120  | G0:0044446 | <1e-4 | sll10269 | G0:0003723 | 0.0508 |
| sll11389 | G0:0034641 | <1e-4 | sll1241  | G0:0019752 | <1e-4 | sll11272 | G0:0043167 | <1e-4 | s1r1667  | G0:0043226 | <1e-4 | sll10702 | G0:0003723 | 0.0508 |
| ssr1768  | G0:0044271 | <1e-4 | s1r1104  | G0:0022607 | <1e-4 | s1r1174  | G0:0015293 | <1e-4 | sll11891 | G0:0005575 | <1e-4 | sll10647 | G0:0003723 | 0.0508 |
| ssr2848  | G0:0006631 | <1e-4 | sll11304 | G0:0006720 | <1e-4 | s1r1338  | G0:0022857 | <1e-4 | ssr3570  | G0:0005575 | <1e-4 | s1r0317  | G0:0003723 | 0.0508 |
| s1r1398  | G0:0006793 | <1e-4 | ss12807  | G0:0080090 | <1e-4 | s1r0108  | G0:0022832 | <1e-4 | sll11232 | G0:0005575 | <1e-4 | sll10272 | G0:0003723 | 0.0508 |
| sll10072 | G0:0009889 | <1e-4 | s1r0455  | G0:0006811 | <1e-4 | s1r0300  | G0:0016741 | <1e-4 | s1r6088  | G0:0044446 | <1e-4 | sll10103 | G0:0003723 | 0.0508 |
| sll11873 | G0:0006631 | <1e-4 | sll11601 | G0:0019752 | <1e-4 | ss17051  | G0:0015267 | <1e-4 | ssr1425  | G0:0044425 | <1e-4 | sll11912 | G0:0003723 | 0.0508 |
| sll11659 | G0:0050789 | <1e-4 | s1r0489  | G0:0043933 | <1e-4 | ssr6046  | G0:0022890 | <1e-4 | sll18012 | G0:0044422 | <1e-4 | s1r0919  | G0:0003723 | 0.0508 |
| sll10241 | G0:0019752 | <1e-4 | sll17033 | G0:0031323 | <1e-4 | ss13615  | G0:0015405 | <1e-4 | ssr6026  | G0:0044444 | <1e-4 | sll10606 | G0:0003723 | 0.0508 |
| ss17022  | G0:0065007 | <1e-4 | ssr3467  | G0:0048523 | <1e-4 | sll11531 | G0:0015077 | <1e-4 | ss15008  | G0:0044425 | <1e-4 | sll10861 | G0:0016787 | 0.05   |
| s1r1644  | G0:0009263 | <1e-4 | sll11571 | G0:0031326 | <1e-4 | sll10369 | G0:0022832 | <1e-4 | s1r5087  | G0:0005575 | <1e-4 | s1r1658  | G0:0005515 | 0.0493 |
| sll1061  | G0:0009259 | <1e-4 | sll11652 | G0:0072522 | <1e-4 | sll11763 | G0:0022832 | <1e-4 | s1r0708  | G0:0043226 | <1e-4 | ssr3300  | G0:0005515 | 0.0493 |
| ssr2711  | G0:0044260 | <1e-4 | sll18002 | G0:0009123 | <1e-4 | sll10847 | G0:0022832 | <1e-4 | sll10596 | G0:0044446 | <1e-4 | s1r0815  | G0:0005515 | 0.0493 |
| s1r2052  | G0:0050789 | <1e-4 | s1r1534  | G0:0034654 | <1e-4 | sll10327 | G0:0005342 | <1e-4 | sll11166 | G0:0044424 | <1e-4 | sll11390 | G0:0005515 | 0.0493 |
| s1r1563  | G0:0009893 | <1e-4 | s1r0771  | G0:0005996 | <1e-4 | sll17047 | G0:0022832 | <1e-4 | sll11675 | G0:0044424 | <1e-4 | sll10297 | G0:0005515 | 0.0493 |
| ssr2781  | G0:0071841 | <1e-4 | sll10641 | G0:0019362 | <1e-4 | s1r1258  | G0:0015075 | <1e-4 | s1r1577  | G0:0044425 | <1e-4 | s1r1169  | G0:0005515 | 0.0493 |
| sll11769 | G0:0010468 | <1e-4 | ss10350  | G0:0009991 | <1e-4 | sll11863 | G0:0015267 | <1e-4 | s1r0482  | G0:0044422 | <1e-4 | s1r0468  | G0:0005515 | 0.0493 |
| sll10659 | G0:0071840 | <1e-4 | s1r0172  | G0:0009991 | <1e-4 | sll10442 | G0:0015291 | <1e-4 | sll11573 | G0:0043226 | <1e-4 | s1r0112  | G0:0005515 | 0.0493 |
| ss10242  | G0:0006576 | <1e-4 | s1r0480  | G0:0006720 | <1e-4 | s1r0250  | G0:0060089 | <1e-4 | s1r1774  | G0:0044425 | <1e-4 | s1r0962  | G0:0005515 | 0.0493 |
| s1r0728  | G0:0009057 | <1e-4 | s1r1674  | G0:0031326 | <1e-4 | s1r2118  | G0:0022891 | <1e-4 | ss12138  | G0:0044444 | <1e-4 | s1r0935  | G0:0005515 | 0.0493 |
| sll18007 | G0:0006811 | <1e-4 | s1r1957  | G0:0071554 | <1e-4 | s1r0345  | G0:0008171 | <1e-4 | s1r0442  | G0:0005575 | <1e-4 | sll10997 | G0:0005515 | 0.0493 |
| sll11696 | G0:0009124 | <1e-4 | sll12013 | G0:0009199 | <1e-4 | s1r5037  | G0:0016818 | <1e-4 | ssr3300  | G0:0005575 | <1e-4 | s1r0272  | G0:0005515 | 0.0493 |
| sll11834 | G0:0009991 | <1e-4 | s1r6005  | G0:0009165 | <1e-4 | ss17074  | G0:0022836 | <1e-4 | sll10325 | G0:0044424 | <1e-4 | s1r0483  | G0:0005515 | 0.0493 |
| s1r1071  | G0:0044260 | <1e-4 | s1r0168  | G0:0009263 | <1e-4 | s1r0505  | G0:0022857 | <1e-4 | ssr8047  | G0:0044422 | <1e-4 | s1r2005  | G0:0005515 | 0.0493 |
| sll10763 | G0:0080090 | <1e-4 | sll10584 | G0:0009161 | <1e-4 | s1r1397  | G0:0015291 | <1e-4 | s1r0106  | G0:0044422 | <1e-4 | s1r1074  | G0:0005515 | 0.0493 |
| sll10412 | G0:0009144 | <1e-4 | s1r1958  | G0:0072528 | <1e-4 | sg10001  | G0:0015405 | <1e-4 | s1r0517  | G0:0044425 | <1e-4 | s1r0924  | G0:0005515 | 0.0493 |
| ss11577  | G0:0072522 | <1e-4 | ssr6003  | G0:0043933 | <1e-4 | sll11954 | G0:0016817 | <1e-4 | ssr5121  | G0:0044422 | <1e-4 | sll11659 | G0:0005515 | 0.0493 |

|          |            |       |          |            |       |          |            |       |          |            |       |          |            |        |
|----------|------------|-------|----------|------------|-------|----------|------------|-------|----------|------------|-------|----------|------------|--------|
| slr1110  | G0:0019752 | <1e-4 | sll1601  | G0:0060255 | <1e-4 | ssr6019  | G0:0060089 | <1e-4 | slr6090  | G0:0043226 | <1e-4 | slr1613  | G0:0005515 | 0.0493 |
| sll1024  | G0:0051179 | <1e-4 | sll0543  | G0:0006721 | <1e-4 | sll0732  | G0:0022832 | <1e-4 | sll0910  | G0:0044422 | <1e-4 | slr0510  | G0:0005515 | 0.0493 |
| sll1532  | G0:0071840 | <1e-4 | sll0310  | G0:0044260 | <1e-4 | slr1194  | G0:0005342 | <1e-4 | slr7026  | G0:0005575 | <1e-4 | slr1827  | G0:0005515 | 0.0493 |
| slr1261  | G0:0006091 | <1e-4 | sll1304  | G0:0051186 | <1e-4 | slr0503  | G0:0015293 | <1e-4 | sll1874  | G0:0005575 | <1e-4 | slr0111  | G0:0005515 | 0.0493 |
| ssl0294  | G0:0080090 | <1e-4 | slr0869  | G0:0006631 | <1e-4 | sll5097  | G0:0022857 | <1e-4 | sll0268  | G0:0043226 | <1e-4 | sll10740 | G0:0005515 | 0.0493 |
| sll1072  | G0:0009150 | <1e-4 | sll0192  | G0:0055082 | <1e-4 | slr0610  | G0:0015291 | <1e-4 | sll0572  | G0:0044444 | <1e-4 | sll10752 | G0:0005515 | 0.0493 |
| sll1239  | G0:0034641 | <1e-4 | slr1442  | G0:0051716 | <1e-4 | sll0376  | G0:0043167 | <1e-4 | sll0010  | G0:0044464 | <1e-4 | sll11173 | G0:0005515 | 0.0493 |
| slr6006  | G0:0051179 | <1e-4 | slr1340  | G0:0006811 | <1e-4 | slr1572  | G0:0015075 | <1e-4 | slr0989  | G0:0044444 | <1e-4 | sll1040  | G0:0005515 | 0.0493 |
| sll0614  | G0:0010468 | <1e-4 | sll0853  | G0:0050794 | <1e-4 | sll0861  | G0:0042626 | <1e-4 | ssl7021  | G0:0005575 | <1e-4 | sll10572 | G0:0005515 | 0.0493 |
| sll0447  | G0:0043170 | <1e-4 | sll7090  | G0:0044281 | <1e-4 | sll0266  | G0:0015405 | <1e-4 | ssl7007  | G0:0044424 | <1e-4 | sll11241 | G0:0005515 | 0.0493 |
| slr1726  | G0:0009991 | <1e-4 | slr0049  | G0:0034641 | <1e-4 | sll5003  | G0:0015399 | <1e-4 | sll10156 | G0:0044444 | <1e-4 | sll11730 | G0:0005515 | 0.0493 |
| ssr2787  | G0:0009987 | <1e-4 | ssr6003  | G0:0043412 | <1e-4 | sll0875  | G0:0022832 | <1e-4 | slr1601  | G0:0005575 | <1e-4 | slr0456  | G0:0005515 | 0.0493 |
| sll10553 | G0:0022607 | <1e-4 | slr0610  | G0:0008610 | <1e-4 | slr1599  | G0:0022857 | <1e-4 | slr0272  | G0:0005575 | <1e-4 | sll10180 | G0:0005515 | 0.0493 |
| slr1668  | G0:0046164 | <1e-4 | slr1851  | G0:0006721 | <1e-4 | sll1025  | G0:0043492 | <1e-4 | slr0031  | G0:0044424 | <1e-4 | sll11512 | G0:0005515 | 0.0493 |
| ssl0312  | G0:0072522 | <1e-4 | slr1752  | G0:0046128 | <1e-4 | slr5119  | G0:0015293 | <1e-4 | sll11532 | G0:0044444 | <1e-4 | slr0172  | G0:0005515 | 0.0493 |
| sll1174  | G0:0009893 | <1e-4 | sll0327  | G0:0071842 | <1e-4 | slr1442  | G0:0016462 | <1e-4 | sll11634 | G0:0044425 | <1e-4 | sll10281 | G0:0005515 | 0.0493 |
| slr0408  | G0:0006766 | <1e-4 | slr1619  | G0:0051188 | <1e-4 | slr1259  | G0:0005342 | <1e-4 | slr1768  | G0:0043226 | <1e-4 | sll10410 | G0:0005515 | 0.0493 |
| slr0456  | G0:0046483 | <1e-4 | ssr6083  | G0:0033013 | <1e-4 | ssr1114  | G0:0022891 | <1e-4 | slr0092  | G0:0044444 | <1e-4 | sll10781 | G0:0005515 | 0.0493 |
| slr1568  | G0:0090304 | <1e-4 | sll11232 | G0:0019751 | <1e-4 | sll11853 | G0:0016818 | <1e-4 | slr6029  | G0:0044425 | <1e-4 | slr0232  | G0:0005515 | 0.0493 |
| slr0589  | G0:0042180 | <1e-4 | ssl5099  | G0:0019752 | <1e-4 | sll11942 | G0:0016817 | <1e-4 | sll10638 | G0:0044444 | <1e-4 | sll11054 | G0:0005515 | 0.0493 |
| ssr2047  | G0:0009260 | <1e-4 | slr1530  | G0:0050794 | <1e-4 | slr1998  | G0:0022836 | <1e-4 | ssl7007  | G0:0044444 | <1e-4 | ssl8008  | G0:0005515 | 0.0493 |
| sll2013  | G0:0051818 | <1e-4 | slr0887  | G0:0006793 | <1e-4 | slr2084  | G0:0015293 | <1e-4 | slr1117  | G0:0044464 | <1e-4 | slr1258  | G0:0005515 | 0.0493 |
| slr0545  | G0:0006753 | <1e-4 | slr1097  | G0:0006721 | <1e-4 | slr1956  | G0:0060089 | <1e-4 | ssl3291  | G0:0043226 | <1e-4 | sll11072 | G0:0005515 | 0.0493 |
| ssl7074  | G0:0009199 | <1e-4 | sll0590  | G0:0010556 | <1e-4 | slr0815  | G0:0022891 | <1e-4 | slr1900  | G0:0044444 | <1e-4 | slr0789  | G0:0005515 | 0.0493 |
| ssr2615  | G0:0009987 | <1e-4 | sll1390  | G0:0019752 | <1e-4 | sll11965 | G0:0016741 | <1e-4 | sll17078 | G0:0044424 | <1e-4 | slr0060  | G0:0005515 | 0.0493 |
| sll1938  | G0:0042180 | <1e-4 | slr1444  | G0:0009141 | <1e-4 | sll11749 | G0:0015405 | <1e-4 | ssl6061  | G0:0044464 | <1e-4 | sll11170 | G0:0005515 | 0.0493 |
| slr6045  | G0:0046164 | <1e-4 | slr0885  | G0:0009394 | <1e-4 | sll10564 | G0:0016741 | <1e-4 | slr1812  | G0:0044444 | <1e-4 | sll11738 | G0:0005515 | 0.0493 |
| sll10590 | G0:0019637 | <1e-4 | slr0006  | G0:0006091 | <1e-4 | slr6063  | G0:0043492 | <1e-4 | slr0243  | G0:0044422 | <1e-4 | sll10827 | G0:0005515 | 0.0493 |
| ssr2047  | G0:0043436 | <1e-4 | sll18001 | G0:0051234 | <1e-4 | ssr6048  | G0:0043167 | <1e-4 | sll11447 | G0:0044425 | <1e-4 | slr0923  | G0:0004871 | 0.0487 |
| sll11009 | G0:0009987 | <1e-4 | sll7065  | G0:0016054 | <1e-4 | slr0730  | G0:0022838 | <1e-4 | slr2118  | G0:0044424 | <1e-4 | sll10577 | G0:0004871 | 0.0487 |
| slr6064  | G0:0019637 | <1e-4 | slr0453  | G0:0051188 | <1e-4 | slr1122  | G0:0016741 | <1e-4 | slr1391  | G0:0043226 | <1e-4 | sll10192 | G0:0004871 | 0.0487 |
| sll15006 | G0:0045184 | <1e-4 | ssl2065  | G0:0009056 | <1e-4 | slr0613  | G0:0022857 | <1e-4 | slr0596  | G0:0043226 | <1e-4 | slr0978  | G0:0004871 | 0.0487 |
| sll10068 | G0:0072528 | <1e-4 | slr0702  | G0:0050789 | <1e-4 | slr1863  | G0:0003674 | <1e-4 | slr1081  | G0:0043226 | <1e-4 | slr0607  | G0:0004871 | 0.0487 |
| ssl3291  | G0:0031323 | <1e-4 | ssr1155  | G0:0005996 | <1e-4 | sll11512 | G0:0043167 | <1e-4 | slr1636  | G0:0005575 | <1e-4 | ssl0353  | G0:0004871 | 0.0487 |
| slr0407  | G0:0072528 | <1e-4 | sll10785 | G0:0019362 | <1e-4 | slr1800  | G0:0043167 | <1e-4 | sll10931 | G0:0044425 | <1e-4 | sll10910 | G0:0004871 | 0.0487 |
| slr1704  | G0:0072521 | <1e-4 | sll10775 | G0:0044271 | <1e-4 | ssl2996  | G0:0015405 | <1e-4 | slr1846  | G0:0044444 | <1e-4 | sll11562 | G0:0004871 | 0.0487 |
| sll15109 | G0:0009263 | <1e-4 | sll10069 | G0:0009987 | <1e-4 | sll10442 | G0:0015075 | <1e-4 | sll10063 | G0:0043226 | <1e-4 | slr1865  | G0:0004871 | 0.0487 |
| sll18035 | G0:0005996 | <1e-4 | sll10456 | G0:0046483 | <1e-4 | slr0876  | G0:0015293 | <1e-4 | sll11455 | G0:0005575 | <1e-4 | slr1811  | G0:0004871 | 0.0487 |
| slr0780  | G0:0051716 | <1e-4 | ssr2554  | G0:0009394 | <1e-4 | slr0989  | G0:0022890 | <1e-4 | slr0865  | G0:0005575 | <1e-4 | sll11526 | G0:0004871 | 0.0487 |
| slr6012  | G0:0051818 | <1e-4 | slr1066  | G0:0051171 | <1e-4 | sll10397 | G0:0015293 | <1e-4 | sll10597 | G0:0044444 | <1e-4 | slr1301  | G0:0004871 | 0.0487 |
| sll11702 | G0:0009142 | <1e-4 | sll10447 | G0:0009892 | <1e-4 | sll10802 | G0:0005342 | <1e-4 | slr1188  | G0:0044424 | <1e-4 | sll10558 | G0:0004871 | 0.0487 |
| slr1863  | G0:0006811 | <1e-4 | slr1535  | G0:0045184 | <1e-4 | slr1179  | G0:0043167 | <1e-4 | sll11530 | G0:0044444 | <1e-4 | slr0594  | G0:0004871 | 0.0487 |
| slr0400  | G0:0055086 | <1e-4 | slr1659  | G0:0034641 | <1e-4 | slr1179  | G0:0008171 | <1e-4 | slr0865  | G0:0044425 | <1e-4 | slr0962  | G0:0016740 | 0.0478 |
| slr0935  | G0:0042180 | <1e-4 | slr1223  | G0:0046164 | <1e-4 | sll11915 | G0:0043492 | <1e-4 | slr0656  | G0:0044425 | <1e-4 | sll11304 | G0:0016740 | 0.0478 |
| slr5118  | G0:0010556 | <1e-4 | slr0872  | G0:0006733 | <1e-4 | slr5126  | G0:0015075 | <1e-4 | sll11241 | G0:0005575 | <1e-4 | sll11411 | G0:0016740 | 0.0478 |
| sll10189 | G0:0006766 | <1e-4 | slr0341  | G0:0050789 | <1e-4 | slr0149  | G0:0015291 | <1e-4 | sll10296 | G0:0005575 | <1e-4 | slr0112  | G0:0016740 | 0.0478 |
| slr1194  | G0:0071496 | <1e-4 | ssr7035  | G0:0009059 | <1e-4 | slr1944  | G0:0016818 | <1e-4 | sll10072 | G0:0043226 | <1e-4 | slr0742  | G0:0016740 | 0.0478 |
| slr1073  | G0:0046164 | <1e-4 | sll15032 | G0:0051716 | <1e-4 | slr0360  | G0:0015405 | <1e-4 | ssr6032  | G0:0005575 | <1e-4 | sll11730 | G0:0016740 | 0.0478 |
| slr0619  | G0:0009123 | <1e-4 | sll11726 | G0:0080090 | <1e-4 | ssl3692  | G0:0022832 | <1e-4 | sll10565 | G0:0005575 | <1e-4 | slr0981  | G0:0016740 | 0.0478 |
| slr1444  | G0:0046164 | <1e-4 | slr0654  | G0:0046164 | <1e-4 | slr0243  | G0:0015291 | <1e-4 | slr0489  | G0:0005575 | <1e-4 | slr0596  | G0:0016740 | 0.0478 |
| ssr0759  | G0:0006091 | <1e-4 | sll10995 | G0:0050801 | <1e-4 | sll11476 | G0:0042623 | <1e-4 | slr0852  | G0:0044464 | <1e-4 | sll11021 | G0:0016740 | 0.0478 |
| sll10743 | G0:0006082 | <1e-4 | sll11306 | G0:0042180 | <1e-4 | slr1095  | G0:0016817 | <1e-4 | sll11783 | G0:0044464 | <1e-4 | slr1827  | G0:0016740 | 0.0478 |
| slr0374  | G0:0006220 | <1e-4 | sll11995 | G0:0006811 | <1e-4 | slr0742  | G0:0022803 | <1e-4 | ssl0467  | G0:0044444 | <1e-4 | sll11239 | G0:0016740 | 0.0478 |
| slr0423  | G0:0045184 | <1e-4 | sgl0001  | G0:0071554 | <1e-4 | ssl0350  | G0:0022832 | <1e-4 | slr1572  | G0:0043226 | <1e-4 | sll11390 | G0:0016740 | 0.0478 |

s1r0806 G0:0055082 <1e-4 s110735 G0:0071554 <1e-4 s117034 G0:0022832 <1e-4 s111340 G0:0005575 <1e-4 s110180 G0:0016740 0.0478  
s1r1101 G0:0043933 <1e-4 s1r0516 G0:0019222 <1e-4 s1r1114 G0:0015399 <1e-4 ss13142 G0:0044464 <1e-4 s110319 G0:0016740 0.0478  
ssr3532 G0:0044282 <1e-4 s110543 G0:0051234 <1e-4 s1r0975 G0:0016741 <1e-4 s1r2119 G0:0044422 <1e-4 s1r0169 G0:0016740 0.0478  
s110497 G0:0006811 <1e-4 s110837 G0:0055114 <1e-4 s1r2092 G0:0043167 <1e-4 ssr5011 G0:0044464 <1e-4 s1r2048 G0:0016740 0.0478  
s115026 G0:0009126 <1e-4 s1r0400 G0:0046164 <1e-4 s110237 G0:0016818 <1e-4 s111400 G0:0044422 <1e-4 s1r0680 G0:0016740 0.0478  
s111911 G0:0044275 <1e-4 s1r1590 G0:0051188 <1e-4 s110376 G0:0022857 <1e-4 s1r1944 G0:0044446 <1e-4 ssr1552 G0:0016740 0.0478  
s1r1768 G0:0043549 <1e-4 s111262 G0:0006766 <1e-4 s110185 G0:0022836 <1e-4 ssr8047 G0:0005575 <1e-4 s111659 G0:0016740 0.0478  
s1r0514 G0:0050794 <1e-4 s1r5087 G0:0050789 <1e-4 s1r1773 G0:0016818 <1e-4 s110597 G0:0044425 <1e-4 s1r1977 G0:0016740 0.0478  
s110588 G0:0044255 <1e-4 s115130 G0:0043436 <1e-4 s110997 G0:0015077 <1e-4 s110549 G0:0044464 <1e-4 s1r0373 G0:0016740 0.0478  
s1r6065 G0:0031323 <1e-4 ss18003 G0:0051818 <1e-4 s110736 G0:0042623 <1e-4 s1r2110 G0:0005575 <1e-4 s1r2125 G0:0016740 0.0478  
ssr5019 G0:0009262 <1e-4 s111306 G0:0009161 <1e-4 s1r0232 G0:0015399 <1e-4 s1r6050 G0:0044446 <1e-4 s111241 G0:0016740 0.0478  
s110871 G0:0044282 <1e-4 s110443 G0:0009117 <1e-4 s110414 G0:0022857 <1e-4 s1r1462 G0:0044464 <1e-4 s110585 G0:0016740 0.0478  
s110749 G0:0031640 <1e-4 s1r0813 G0:0009259 <1e-4 s1r5102 G0:0016817 <1e-4 s110216 G0:0044422 <1e-4 s110911 G0:0016740 0.0478  
s110444 G0:0072524 <1e-4 s1r1956 G0:0009987 <1e-4 s111024 G0:0015077 <1e-4 s110335 G0:0044446 <1e-4 s111582 G0:0016740 0.0478  
s1r0503 G0:0022411 <1e-4 s1r0821 G0:0006733 <1e-4 s115061 G0:0016746 <1e-4 s110296 G0:0044444 <1e-4 ssr3300 G0:0016740 0.0478  
ssr3402 G0:0051347 <1e-4 s110625 G0:0044248 <1e-4 ssr7036 G0:0015399 <1e-4 s1r1959 G0:0044444 <1e-4 s111738 G0:0016740 0.0478  
s1r1398 G0:0034660 <1e-4 s111174 G0:0065007 <1e-4 s1r1612 G0:0015293 <1e-4 s111880 G0:0005575 <1e-4 s1r1053 G0:0016740 0.0478  
ss15091 G0:0044275 <1e-4 s111446 G0:0046128 <1e-4 ssr1698 G0:0043167 <1e-4 s111651 G0:0043226 <1e-4 s111350 G0:0016740 0.0478  
s110449 G0:0009262 <1e-4 ssr7017 G0:0031323 <1e-4 s111461 G0:0016818 <1e-4 s111764 G0:0044424 <1e-4 s1r2115 G0:0016740 0.0478  
s110994 G0:0009260 <1e-4 s1r0909 G0:0006631 <1e-4 s1r2027 G0:0022803 <1e-4 s1r1752 G0:0044425 <1e-4 s1r1762 G0:0016740 0.0478  
s1r2049 G0:0043412 <1e-4 s111761 G0:0043648 <1e-4 s1r0870 G0:0016818 <1e-4 ss18005 G0:0044422 <1e-4 s1r1541 G0:0016740 0.0478  
s110811 G0:0009889 <1e-4 s110294 G0:0034660 <1e-4 s117070 G0:0022891 <1e-4 s110424 G0:0043226 <1e-4 s1r1288 G0:0016740 0.0478  
s1r0870 G0:0019222 <1e-4 ssr1114 G0:0010468 <1e-4 ssr6024 G0:0015293 <1e-4 s110639 G0:0005575 <1e-4 s1r1383 G0:0016740 0.0478  
s111891 G0:0009161 <1e-4 s1r1699 G0:0043170 <1e-4 s111934 G0:0042623 <1e-4 s110284 G0:0044446 <1e-4 s1r0801 G0:0016740 0.0478  
s111531 G0:0009889 <1e-4 s1r0552 G0:0006793 <1e-4 s111472 G0:0016818 <1e-4 s110296 G0:0044464 <1e-4 s111654 G0:0016740 0.0478  
s111464 G0:0052111 <1e-4 s1r0664 G0:0009141 <1e-4 s1r1102 G0:0015075 <1e-4 s1r1315 G0:0044425 <1e-4 s110888 G0:0016740 0.0478  
s111247 G0:0031323 <1e-4 ss11972 G0:0008150 <1e-4 s1r1079 G0:0022891 <1e-4 s111415 G0:0005575 <1e-4 ss13382 G0:0016740 0.0478  
s111853 G0:0048523 <1e-4 s1r0784 G0:0046907 <1e-4 s1r0060 G0:0022832 <1e-4 s1r6044 G0:0044464 <1e-4 s111956 G0:0016740 0.0478  
s1r1270 G0:0034641 <1e-4 ssr1768 G0:0008610 <1e-4 s1r0489 G0:0043167 <1e-4 s110066 G0:0005575 <1e-4 s111505 G0:0016740 0.0478  
s111902 G0:0065007 <1e-4 s1r1566 G0:0051171 <1e-4 s1r1676 G0:0022832 <1e-4 s1r1920 G0:0044422 <1e-4 s1r1287 G0:0016740 0.0478  
s1r1964 G0:0031640 <1e-4 s1r1926 G0:0046483 <1e-4 s1r2027 G0:0016741 <1e-4 s1r0109 G0:0005575 <1e-4 s110141 G0:0016740 0.0478  
s111304 G0:0009263 <1e-4 s110783 G0:0060255 <1e-4 s110615 G0:0015077 <1e-4 s1r7057 G0:0044424 <1e-4 s1r1062 G0:0016740 0.0478  
ss13383 G0:0009126 <1e-4 s111681 G0:0006733 <1e-4 s110406 G0:0043167 <1e-4 s1r1923 G0:0044424 <1e-4 s110981 G0:0016740 0.0478  
s1r0326 G0:0019752 <1e-4 s1r1999 G0:0016054 <1e-4 ssr2843 G0:0016741 <1e-4 s110786 G0:0044425 <1e-4 s1r0249 G0:0016740 0.0478  
s1r1117 G0:0048522 <1e-4 s110060 G0:0006732 <1e-4 s1r1236 G0:0015267 <1e-4 ssr2317 G0:0044446 <1e-4 s1r1647 G0:0016740 0.0478  
s1r1659 G0:0044281 <1e-4 s1r2005 G0:0006766 <1e-4 s1r0291 G0:0016746 <1e-4 ss12781 G0:0044425 <1e-4 s1r1128 G0:0016740 0.0478  
ssr7084 G0:0009117 <1e-4 s1r1907 G0:0010468 <1e-4 s110218 G0:0016817 <1e-4 s1r0217 G0:0005575 <1e-4 s110539 G0:0016740 0.0478  
ss13291 G0:0072522 <1e-4 s111455 G0:0065007 <1e-4 s1r0607 G0:0016746 <1e-4 s1r1533 G0:0044444 <1e-4 s110156 G0:0016740 0.0478  
s110355 G0:0044248 <1e-4 s1r1900 G0:0045184 <1e-4 s111938 G0:0022890 <1e-4 s111193 G0:0044424 <1e-4 s1r1169 G0:0016740 0.0478  
s111193 G0:0051246 <1e-4 s111797 G0:0009126 <1e-4 s110645 G0:0042623 <1e-4 s1r1896 G0:0005575 <1e-4 s1r1544 G0:0016740 0.0478  
s1r0656 G0:0051716 <1e-4 s1r0489 G0:0050896 <1e-4 s1r0921 G0:0016817 <1e-4 ssr2972 G0:0044444 <1e-4 s110980 G0:0016740 0.0478  
s110676 G0:0009142 <1e-4 s111442 G0:0045184 <1e-4 s115032 G0:0003674 <1e-4 s1r6100 G0:0044425 <1e-4 s1r1437 G0:0016740 0.0467  
s1r6045 G0:0001932 <1e-4 s110742 G0:0009987 <1e-4 s1r1535 G0:0003674 <1e-4 s1r0990 G0:0044444 <1e-4 s110309 G0:0016740 0.0467  
s110066 G0:0042180 <1e-4 ss13142 G0:0009126 <1e-4 s1r0887 G0:0042623 <1e-4 s1r1363 G0:0044424 <1e-4 s1r1932 G0:0016740 0.0467  
s111606 G0:0071841 <1e-4 s111174 G0:0072522 <1e-4 s110160 G0:0022832 <1e-4 ssr5020 G0:0044422 <1e-4 s1r1230 G0:0016740 0.0467  
s110047 G0:0005996 <1e-4 s115033 G0:0006066 <1e-4 s111797 G0:0015399 <1e-4 s1r5013 G0:0005575 <1e-4 s111632 G0:0016740 0.0467  
s1r5023 G0:0009142 <1e-4 s110101 G0:0044260 <1e-4 s118035 G0:0015405 <1e-4 s1r1338 G0:0044446 <1e-4 s1r2111 G0:0016740 0.0467  
ssr8013 G0:0006163 <1e-4 ssr0335 G0:0009144 <1e-4 s110325 G0:0022890 <1e-4 s111461 G0:0043226 <1e-4 s110023 G0:0016740 0.0467  
s1r1303 G0:0042180 <1e-4 s1r1864 G0:0072522 <1e-4 s111527 G0:0015291 <1e-4 s1r6005 G0:0044464 <1e-4 s110497 G0:0016740 0.0467  
ss12807 G0:0006631 <1e-4 s1r1885 G0:0006732 <1e-4 ss13382 G0:0005342 <1e-4 ss16061 G0:0043226 <1e-4 ssr2551 G0:0016740 0.0467  
s1r1034 G0:0072528 <1e-4 s1r1365 G0:0031326 <1e-4 s1r1270 G0:0008171 <1e-4 ssr2201 G0:0044446 <1e-4 s110216 G0:0016740 0.0467  
s1r1082 G0:0043170 <1e-4 s110269 G0:0046164 <1e-4 s111306 G0:0015293 <1e-4 s110448 G0:0044446 <1e-4 s1r0431 G0:0016740 0.0467  
s111775 G0:0065007 <1e-4 s118040 G0:0006576 <1e-4 s1r1187 G0:0015077 <1e-4 s1r1530 G0:0044464 <1e-4 ssr2962 G0:0016740 0.0467  
s111442 G0:0044283 <1e-4 s1r2060 G0:0051179 <1e-4 s1r7097 G0:0042623 <1e-4 s111531 G0:0044446 <1e-4 s1r1084 G0:0016740 0.0467

sl10910 G0:0009117 <1e-4 ssr0761 G0:0009057 <1e-4 slr7083 G0:0005342 <1e-4 slr0643 G0:0005575 <1e-4 ssr2615 G0:0016740 0.0467  
slr5012 G0:0031640 <1e-4 slr1907 G0:0043412 <1e-4 slr0006 G0:0022890 <1e-4 slr1222 G0:0044422 <1e-4 ssr12807 G0:0016740 0.0467  
slr1179 G0:0034654 <1e-4 sl11902 G0:0090304 <1e-4 ss11377 G0:0008171 <1e-4 slr6005 G0:0044444 <1e-4 slr1788 G0:0016740 0.0467  
sl10639 G0:0071496 <1e-4 sl11061 G0:0051171 <1e-4 sl10505 G0:0015077 <1e-4 ss18003 G0:0044422 <1e-4 slr0392 G0:0016740 0.0467  
slr1391 G0:0009165 <1e-4 sl10297 G0:0006766 <1e-4 slr1789 G0:0043167 <1e-4 slr2070 G0:0044444 <1e-4 slr0006 G0:0016740 0.0467  
slr1103 G0:0033013 <1e-4 sl10661 G0:0052188 <1e-4 ssr1425 G0:0043492 <1e-4 slr1917 G0:0044424 <1e-4 slr1571 G0:0016740 0.0467  
sl11135 G0:0006721 <1e-4 slr2120 G0:0009117 <1e-4 ss12807 G0:0022803 <1e-4 ssr6002 G0:0005575 <1e-4 sl11658 G0:0016740 0.0467  
slr8021 G0:0051818 <1e-4 slr5077 G0:0044282 <1e-4 slr0625 G0:0022892 <1e-4 sl15132 G0:0044422 <1e-4 slr1667 G0:0016740 0.0467  
ss18028 G0:0009892 <1e-4 sl11060 G0:0071554 <1e-4 ss12814 G0:0022891 <1e-4 ss17048 G0:0044464 <1e-4 slr0668 G0:0016740 0.0467  
sl10423 G0:0001932 <1e-4 sl10216 G0:0050794 <1e-4 sl10423 G0:0022838 <1e-4 sl10854 G0:0044464 <1e-4 slr0941 G0:0016740 0.0467  
slr6033 G0:0009132 <1e-4 slr0211 G0:0009309 <1e-4 sl10743 G0:0016462 <1e-4 slr1809 G0:0043226 <1e-4 slr0455 G0:0008168 0.0454  
sl17063 G0:0009124 <1e-4 sl11640 G0:0031323 <1e-4 sl11186 G0:0022890 <1e-4 slr0582 G0:0043226 <1e-4 slr1762 G0:0008168 0.0454  
sl10614 G0:0009262 <1e-4 slr2011 G0:0072522 <1e-4 sl10846 G0:0016746 <1e-4 sl11218 G0:0043226 <1e-4 ssr2754 G0:0008168 0.0454  
slr0374 G0:0080090 <1e-4 slr0909 G0:0050896 <1e-4 slr1114 G0:0016741 <1e-4 slr0869 G0:0005575 <1e-4 slr1413 G0:0008168 0.0454  
sl11049 G0:0019751 <1e-4 slr6100 G0:0048878 <1e-4 sl16052 G0:0022803 <1e-4 ssr2009 G0:0005575 <1e-4 sl11950 G0:0008168 0.0454  
ss18003 G0:0019362 <1e-4 sl11696 G0:0034654 <1e-4 slr6101 G0:0015075 <1e-4 sl10481 G0:0044425 <1e-4 slr2048 G0:0008168 0.0454  
slr0709 G0:0034641 <1e-4 sl15089 G0:0009161 <1e-4 slr2025 G0:0015399 <1e-4 sl11232 G0:0044424 <1e-4 slr1658 G0:0008168 0.0454  
sl10301 G0:0031640 <1e-4 sl10508 G0:0043648 <1e-4 sl10010 G0:0016818 <1e-4 slr1926 G0:0044425 <1e-4 sl10156 G0:0008168 0.0454  
sl10505 G0:0044260 <1e-4 slr1799 G0:0010556 <1e-4 sl10446 G0:0022838 <1e-4 sl11969 G0:0043226 <1e-4 sl10740 G0:0008168 0.0454  
sl10488 G0:0009141 <1e-4 sl11024 G0:0048878 <1e-4 slr6103 G0:0022803 <1e-4 slr0914 G0:0044424 <1e-4 sl10810 G0:0008168 0.0454  
slr0172 G0:0051171 <1e-4 slr6049 G0:0060255 <1e-4 sl11273 G0:0015291 <1e-4 sl15046 G0:0044446 <1e-4 sl11021 G0:0008168 0.0454  
sl11119 G0:0009308 <1e-4 slr0960 G0:0072528 <1e-4 ssr1114 G0:0022838 <1e-4 sl17047 G0:0044424 <1e-4 sl10141 G0:0008168 0.0454  
slr5126 G0:0009161 <1e-4 slr1303 G0:0048518 <1e-4 sl11285 G0:0022838 <1e-4 sl11173 G0:0044444 <1e-4 slr1259 G0:0008168 0.0454  
slr1812 G0:0050896 <1e-4 slr0731 G0:0043170 <1e-4 sl11583 G0:0015291 <1e-4 slr0483 G0:0043226 <1e-4 slr1613 G0:0008168 0.0454  
sl11736 G0:0042455 <1e-4 slr1262 G0:0034654 <1e-4 ssr1552 G0:0016746 <1e-4 sl11381 G0:0044444 <1e-4 slr0887 G0:0008168 0.0454  
slr5024 G0:0071841 <1e-4 slr1676 G0:0010556 <1e-4 slr7016 G0:0016817 <1e-4 slr0771 G0:0044425 <1e-4 slr0729 G0:0008168 0.0454  
ss15096 G0:0051347 <1e-4 slr0625 G0:0071554 <1e-4 sl10861 G0:0022838 <1e-4 sl10381 G0:0044422 <1e-4 slr1209 G0:0008168 0.0454  
slr2111 G0:0009126 <1e-4 slr1814 G0:0044260 <1e-4 slr0586 G0:0015293 <1e-4 ssr3122 G0:0005575 <1e-4 slr1053 G0:0008168 0.0454  
slr0516 G0:0009892 <1e-4 sl11939 G0:0071554 <1e-4 sl11730 G0:0043167 <1e-4 slr0575 G0:0044422 <1e-4 slr0664 G0:0008168 0.0454  
ssr1425 G0:0006066 <1e-4 sl10563 G0:0019219 <1e-4 slr0730 G0:0022891 <1e-4 sl11586 G0:0005575 <1e-4 slr0111 G0:0008168 0.0454  
ss12920 G0:0071840 <1e-4 slr0656 G0:0071842 <1e-4 slr7023 G0:0016741 <1e-4 ssr0102 G0:0043226 <1e-4 sl11752 G0:0008168 0.0454  
sl11938 G0:0065007 <1e-4 sl17062 G0:0016054 <1e-4 sl10149 G0:0005216 <1e-4 slr0241 G0:0005575 <1e-4 sl10588 G0:0008168 0.0454  
slr1907 G0:0006793 <1e-4 ssr3532 G0:0006793 <1e-4 slr1110 G0:0022838 <1e-4 slr1917 G0:0043226 <1e-4 slr1977 G0:0008168 0.0454  
ssr0102 G0:0019219 <1e-4 sl10854 G0:0051818 <1e-4 slr0510 G0:0043167 <1e-4 slr7083 G0:0005575 <1e-4 ss18008 G0:0008168 0.0454  
slr5012 G0:0072524 <1e-4 ss13142 G0:0051716 <1e-4 sl11321 G0:0015399 <1e-4 sl10691 G0:0044444 <1e-4 sl10669 G0:0008168 0.0454  
sl11873 G0:0044003 <1e-4 slr1056 G0:0006631 <1e-4 slr0217 G0:0016817 <1e-4 ss18008 G0:0044422 <1e-4 sl10997 G0:0008168 0.0454  
slr1275 G0:0009987 <1e-4 sl10328 G0:0006753 <1e-4 slr1571 G0:0022892 <1e-4 slr1436 G0:0044464 <1e-4 slr2005 G0:0008168 0.0454  
slr1721 G0:0050794 <1e-4 sl10588 G0:0031326 <1e-4 slr1774 G0:0015293 <1e-4 sl11898 G0:0044464 <1e-4 sl10147 G0:0008168 0.0454  
sl12006 G0:0019751 <1e-4 slr1079 G0:0048878 <1e-4 sl10230 G0:0022832 <1e-4 slr1066 G0:0044464 <1e-4 slr1122 G0:0008168 0.0454  
sl11241 G0:0045184 <1e-4 ssr2711 G0:0042180 <1e-4 ss12148 G0:0016817 <1e-4 sl11571 G0:0005575 <1e-4 sl11002 G0:0005975 0.0448  
slr2070 G0:0071496 <1e-4 sl11752 G0:0022607 <1e-4 ss10739 G0:0016741 <1e-4 slr1436 G0:0005575 <1e-4 ssr2551 G0:0005975 0.0448  
slr1287 G0:0042451 <1e-4 ss12595 G0:0046394 <1e-4 slr1263 G0:0005342 <1e-4 slr1033 G0:0005575 <1e-4 slr1573 G0:0005975 0.0448  
ssr0332 G0:0044282 <1e-4 slr5112 G0:0009309 <1e-4 sl10860 G0:0022857 <1e-4 slr2122 G0:0044444 <1e-4 sl10703 G0:0005975 0.0448  
sl10265 G0:0009126 <1e-4 ss11520 G0:0046907 <1e-4 sl10157 G0:0015405 <1e-4 slr0959 G0:0044425 <1e-4 sl10237 G0:0005975 0.0448  
slr1964 G0:0019751 <1e-4 slr1599 G0:0055086 <1e-4 slr1977 G0:0043492 <1e-4 sl15006 G0:0044425 <1e-4 ssr2439 G0:0005975 0.0448  
ssr7035 G0:0072521 <1e-4 slr1032 G0:0072524 <1e-4 slr1394 G0:0022890 <1e-4 ss12245 G0:0044444 <1e-4 sl10309 G0:0005975 0.0448  
ss13615 G0:0016054 <1e-4 slr0590 G0:0006753 <1e-4 slr1073 G0:0022857 <1e-4 slr2121 G0:0044446 <1e-4 slr1230 G0:0005975 0.0448  
slr1396 G0:0009161 <1e-4 sl10102 G0:0034660 <1e-4 slr1150 G0:0016746 <1e-4 sl12006 G0:0005575 <1e-4 sl10243 G0:0005975 0.0448  
sl10249 G0:0006732 <1e-4 slr6045 G0:0009199 <1e-4 ss10350 G0:0022890 <1e-4 sl10985 G0:0044422 <1e-4 sl10785 G0:0005975 0.0448  
sl10167 G0:0043648 <1e-4 slr0272 G0:0009987 <1e-4 sl11380 G0:0015405 <1e-4 slr1071 G0:0044444 <1e-4 ssr2787 G0:0005975 0.0448  
slr2103 G0:0046164 <1e-4 slr1484 G0:0006091 <1e-4 ss15108 G0:0005342 <1e-4 sl11979 G0:0005575 <1e-4 slr1436 G0:0005975 0.0448  
ssr2142 G0:0046483 <1e-4 slr1636 G0:0043549 <1e-4 slr0304 G0:0015293 <1e-4 sl11726 G0:0005575 <1e-4 slr2144 G0:0005975 0.0448  
slr0821 G0:0006066 <1e-4 slr1230 G0:0019222 <1e-4 sl10860 G0:0015075 <1e-4 sl10063 G0:0044464 <1e-4 slr1081 G0:0005975 0.0448  
ssr6027 G0:0072522 <1e-4 ssr2553 G0:0034654 <1e-4 ss16035 G0:0022857 <1e-4 slr0698 G0:0005575 <1e-4 slr1885 G0:0005975 0.0448

ssr2803 GO:0048878 <1e-4 slr2003 GO:0009123 <1e-4 sl10252 GO:0004872 <1e-4 sl11285 GO:0044444 <1e-4 slr0913 GO:0005975 0.0448  
slr6049 GO:0006732 <1e-4 slr1677 GO:0052188 <1e-4 sl15090 GO:0022832 <1e-4 sssr6027 GO:0044424 <1e-4 ss12807 GO:0005975 0.0448  
slr1376 GO:0034654 <1e-4 slr0605 GO:0052188 <1e-4 sssr2553 GO:0042623 <1e-4 ss12162 GO:0043226 <1e-4 slr1117 GO:0005975 0.0448  
slr1340 GO:0065007 <1e-4 sssr6099 GO:0022411 <1e-4 slr1074 GO:0015293 <1e-4 slr1419 GO:0044422 <1e-4 slr1638 GO:0005975 0.0448  
slr0039 GO:0050896 <1e-4 sl15032 GO:0009987 <1e-4 sl11730 GO:0022892 <1e-4 slr1570 GO:0044425 <1e-4 slr0569 GO:0005515 0.0447  
slr1117 GO:0009126 <1e-4 sl10024 GO:0031640 <1e-4 slr1819 GO:0043167 <1e-4 sl17029 GO:0005575 <1e-4 ss15095 GO:0005515 0.0447  
sl11218 GO:0009260 <1e-4 sssr5074 GO:0009057 <1e-4 sl11638 GO:0015267 <1e-4 slr0751 GO:0044425 <1e-4 sl11571 GO:0005515 0.0447  
slr1209 GO:0009260 <1e-4 ss15100 GO:0090304 <1e-4 slr7057 GO:0016817 <1e-4 slr7059 GO:0044446 <1e-4 slr1397 GO:0005515 0.0447  
slr0423 GO:0044003 <1e-4 sssr1558 GO:0009150 <1e-4 slr2084 GO:0005342 <1e-4 slr0360 GO:0044464 <1e-4 ss10312 GO:0005515 0.0447  
sl10760 GO:0044260 <1e-4 sssr2754 GO:0051179 <1e-4 sl11528 GO:0022857 <1e-4 sssr1528 GO:0044464 <1e-4 slr0262 GO:0005515 0.0447  
sl11552 GO:0006631 <1e-4 slr6065 GO:0043412 <1e-4 slr6015 GO:0015399 <1e-4 sl10783 GO:0044464 <1e-4 slr6090 GO:0005515 0.0447  
slr1814 GO:0019222 <1e-4 ss11923 GO:0031326 <1e-4 sl10596 GO:0015405 <1e-4 sl11388 GO:0044444 <1e-4 slr6101 GO:0005515 0.0447  
slr1544 GO:0048523 <1e-4 sl11455 GO:0005996 <1e-4 slr1045 GO:0005342 <1e-4 slr1547 GO:0005575 <1e-4 slr5118 GO:0005515 0.0447  
ssr2439 GO:0006631 <1e-4 slr1287 GO:0046164 <1e-4 slr1814 GO:0016818 <1e-4 slr6074 GO:0043226 <1e-4 slr0337 GO:0005515 0.0447  
slr1032 GO:0006066 <1e-4 sl10412 GO:0006732 <1e-4 sl10781 GO:0015399 <1e-4 slr6004 GO:0044464 <1e-4 sl18004 GO:0005515 0.0447  
ss15095 GO:0072524 <1e-4 slr1668 GO:0019752 <1e-4 sl10478 GO:0022836 <1e-4 sl11155 GO:0044425 <1e-4 sl11866 GO:0005515 0.0447  
slr1196 GO:0046128 <1e-4 slr0109 GO:0008150 <1e-4 slr0392 GO:0016462 <1e-4 slr1398 GO:0044446 <1e-4 slr0959 GO:0005515 0.0447  
ss12814 GO:0065007 <1e-4 sl10269 GO:0010556 <1e-4 sm10011 GO:0022836 <1e-4 ss13177 GO:0005575 <1e-4 sl11735 GO:0005515 0.0447  
ss11498 GO:0006720 <1e-4 slr1315 GO:0034660 <1e-4 slr0780 GO:0015291 <1e-4 sssr3129 GO:0005575 <1e-4 sssr6048 GO:0005515 0.0447  
slr0870 GO:0044260 <1e-4 slr2073 GO:0042455 <1e-4 slr1768 GO:0022832 <1e-4 slr0889 GO:0044446 <1e-4 sssr2611 GO:0005515 0.0447  
ssr0332 GO:0043549 <1e-4 sl10875 GO:0006220 <1e-4 slr1384 GO:0003674 <1e-4 slr1083 GO:0044446 <1e-4 slr7095 GO:0005515 0.0447  
slr1911 GO:0009308 <1e-4 slr0937 GO:0009141 <1e-4 sssr6085 GO:0042623 <1e-4 sl11254 GO:0043226 <1e-4 sl11773 GO:0005515 0.0447  
sl11025 GO:0009987 <1e-4 sssr7084 GO:0034641 <1e-4 sssr2711 GO:0016462 <1e-4 slr0810 GO:0044424 <1e-4 slr1168 GO:0005515 0.0447  
sl11509 GO:0006732 <1e-4 slr1628 GO:0034660 <1e-4 sl11765 GO:0015405 <1e-4 sl11797 GO:0005575 <1e-4 sssr3189 GO:0005515 0.0447  
sl10676 GO:0071496 <1e-4 slr1203 GO:0008150 <1e-4 slr0416 GO:0008171 <1e-4 sl15046 GO:0044424 <1e-4 slr1097 GO:0005515 0.0447  
ssr6002 GO:0050801 <1e-4 slr2005 GO:0019637 <1e-4 ss16092 GO:0022832 <1e-4 ss15095 GO:0043226 <1e-4 slr5116 GO:0005515 0.0447  
slr0545 GO:0065007 <1e-4 sl10414 GO:0031640 <1e-4 slr0780 GO:0022857 <1e-4 slr1104 GO:0044444 <1e-4 slr0398 GO:0005515 0.0447  
slr0112 GO:0009260 <1e-4 sl11681 GO:0009892 <1e-4 slr1593 GO:0015405 <1e-4 sl11503 GO:0044425 <1e-4 ss15129 GO:0005515 0.0447  
ss12781 GO:0046164 <1e-4 sl11321 GO:0022411 <1e-4 sssr2998 GO:0022832 <1e-4 slr6094 GO:0044446 <1e-4 slr2032 GO:0005515 0.0447  
slr0270 GO:0051246 <1e-4 sssr6099 GO:0072521 <1e-4 sssr1114 GO:0015405 <1e-4 slr0878 GO:0044464 <1e-4 sl11355 GO:0005515 0.0447  
slr1880 GO:0052188 <1e-4 slr6067 GO:0048878 <1e-4 sl11586 GO:0016741 <1e-4 ss10350 GO:0044422 <1e-4 sl11691 GO:0005515 0.0447  
sl11526 GO:0005996 <1e-4 slr1276 GO:0071841 <1e-4 sl11250 GO:0015267 <1e-4 sssr1558 GO:0044464 <1e-4 ss12420 GO:0005515 0.0447  
sl17050 GO:0046128 <1e-4 sssr6062 GO:0051716 <1e-4 slr0104 GO:0043167 <1e-4 sl10786 GO:0043226 <1e-4 slr7083 GO:0005515 0.0447  
slr5037 GO:0046128 <1e-4 sl11485 GO:0009165 <1e-4 slr7094 GO:0022836 <1e-4 slr1128 GO:0044422 <1e-4 slr1863 GO:0005515 0.0447  
ss11464 GO:0071840 <1e-4 slr1940 GO:0009142 <1e-4 sl11606 GO:0022832 <1e-4 sssr1766 GO:0044464 <1e-4 ss15007 GO:0005515 0.0447  
sl11832 GO:0044248 <1e-4 sssr2333 GO:0019222 <1e-4 sssr1155 GO:0022890 <1e-4 sl10328 GO:0005575 <1e-4 slr6067 GO:0005515 0.0447  
ssr1425 GO:0071496 <1e-4 slr0787 GO:0006091 <1e-4 sl10069 GO:0015077 <1e-4 slr0013 GO:0005575 <1e-4 ss15098 GO:0005515 0.0447  
slr0755 GO:0045184 <1e-4 sl10503 GO:0050801 <1e-4 slr7099 GO:0022857 <1e-4 slr1087 GO:0044425 <1e-4 sl11510 GO:0005515 0.0447  
slr1053 GO:0019362 <1e-4 sl10995 GO:0009059 <1e-4 sl10448 GO:0022838 <1e-4 sl11214 GO:0044464 <1e-4 slr0196 GO:0005515 0.0447  
slr7102 GO:0006721 <1e-4 slr1287 GO:0006720 <1e-4 sl11573 GO:0022836 <1e-4 sl10185 GO:0005575 <1e-4 sl11797 GO:0005515 0.0447  
slr0397 GO:0071840 <1e-4 slr0270 GO:0006631 <1e-4 slr0373 GO:0042623 <1e-4 slr1240 GO:0044424 <1e-4 slr1957 GO:0005515 0.0447  
slr1301 GO:0009987 <1e-4 slr1173 GO:0001932 <1e-4 sl11954 GO:0022836 <1e-4 sl11306 GO:0044446 <1e-4 ss13142 GO:0005515 0.0447  
slr0294 GO:0006733 <1e-4 slr0503 GO:0046483 <1e-4 sl10280 GO:0022836 <1e-4 sssr0759 GO:0043226 <1e-4 sl10762 GO:0005515 0.0447  
slr0731 GO:0009165 <1e-4 ss15064 GO:0009892 <1e-4 slr2110 GO:0042623 <1e-4 slr1383 GO:0005575 <1e-4 sl11766 GO:0005515 0.0447  
ss17046 GO:0046907 <1e-4 slr1668 GO:0065007 <1e-4 sl11040 GO:0022803 <1e-4 sl10596 GO:0043226 <1e-4 ss12245 GO:0005515 0.0447  
slr1886 GO:0043412 <1e-4 slr0145 GO:0019637 <1e-4 slr0981 GO:0005342 <1e-4 sl10931 GO:0044464 <1e-4 slr0751 GO:0005515 0.0447  
slr1800 GO:0051716 <1e-4 sl10241 GO:0043549 <1e-4 sl11201 GO:0043167 <1e-4 slr1353 GO:0044446 <1e-4 sl11884 GO:0005515 0.0447  
sl10168 GO:0031326 <1e-4 slr0058 GO:0016054 <1e-4 slr0912 GO:0005342 <1e-4 slr1210 GO:0044464 <1e-4 sl11921 GO:0005515 0.0447  
slr0146 GO:0071842 <1e-4 sl10761 GO:0052188 <1e-4 slr1415 GO:0015399 <1e-4 slr0708 GO:0044464 <1e-4 sl11123 GO:0005515 0.0447  
ss10467 GO:0072524 <1e-4 sssr0761 GO:0051246 <1e-4 sl17066 GO:0015075 <1e-4 sl10886 GO:0043226 <1e-4 ss12471 GO:0005515 0.0447  
sl17065 GO:0043933 <1e-4 slr0554 GO:0051818 <1e-4 slr0195 GO:0060089 <1e-4 sl10584 GO:0044425 <1e-4 slr6064 GO:0005515 0.0447  
sl10656 GO:0051186 <1e-4 sl11722 GO:0019752 <1e-4 sl11135 GO:0042623 <1e-4 ss11464 GO:0044422 <1e-4 sssr3410 GO:0005515 0.0447  
sl15132 GO:0009889 <1e-4 slr1472 GO:0016054 <1e-4 sssr2009 GO:0016818 <1e-4 slr5012 GO:0044444 <1e-4 sl10293 GO:0005515 0.0447  
ss12920 GO:0065007 <1e-4 sl10350 GO:0044248 <1e-4 slr1674 GO:0042623 <1e-4 slr0341 GO:0044444 <1e-4 slr1814 GO:0005515 0.0447

|         |            |       |          |            |       |         |            |       |         |            |       |         |            |        |
|---------|------------|-------|----------|------------|-------|---------|------------|-------|---------|------------|-------|---------|------------|--------|
| sl10350 | G0:0009309 | <1e-4 | sl11573  | G0:0055082 | <1e-4 | ssr6019 | G0:0005342 | <1e-4 | slr1880 | G0:0044444 | <1e-4 | sl10802 | G0:0005515 | 0.0447 |
| slr0871 | G0:0006082 | <1e-4 | slr0613  | G0:0018130 | <1e-4 | ssr3402 | G0:0016746 | <1e-4 | sl15097 | G0:0044464 | <1e-4 | sl11863 | G0:0005515 | 0.0447 |
| slr1815 | G0:0050896 | <1e-4 | slr1340  | G0:0042180 | <1e-4 | ssr1391 | G0:0022857 | <1e-4 | slr0602 | G0:0044425 | <1e-4 | slr7080 | G0:0005515 | 0.0447 |
| slr7060 | G0:0006720 | <1e-4 | slr1152  | G0:0009132 | <1e-4 | sl11571 | G0:0022890 | <1e-4 | sl10428 | G0:0044425 | <1e-4 | ss11004 | G0:0005515 | 0.0447 |
| sl11680 | G0:0031326 | <1e-4 | slr1103  | G0:0009987 | <1e-4 | sl11609 | G0:0022836 | <1e-4 | slr2000 | G0:0043226 | <1e-4 | slr0264 | G0:0005515 | 0.0447 |
| slr0195 | G0:0065007 | <1e-4 | slr0364  | G0:0034654 | <1e-4 | slr1896 | G0:0015267 | <1e-4 | sl11680 | G0:0044464 | <1e-4 | slr1484 | G0:0005515 | 0.0447 |
| slr1862 | G0:0051716 | <1e-4 | sl10172  | G0:0001932 | <1e-4 | sl11532 | G0:0005342 | <1e-4 | slr0359 | G0:0044464 | <1e-4 | slr0355 | G0:0005515 | 0.0447 |
| ssr0102 | G0:0051171 | <1e-4 | sl11527  | G0:0019222 | <1e-4 | slr0848 | G0:0060089 | <1e-4 | slr0728 | G0:0043226 | <1e-4 | sl11606 | G0:0005515 | 0.0447 |
| slr0517 | G0:0072522 | <1e-4 | sl18007  | G0:0034641 | <1e-4 | sl11265 | G0:0060089 | <1e-4 | ssr2802 | G0:0044464 | <1e-4 | sl10406 | G0:0005515 | 0.0447 |
| sl10284 | G0:0044271 | <1e-4 | sl10861  | G0:0072521 | <1e-4 | sl15063 | G0:0042623 | <1e-4 | slr0148 | G0:0044422 | <1e-4 | ss15031 | G0:0005515 | 0.0447 |
| sl10085 | G0:0043933 | <1e-4 | slr0304  | G0:0019752 | <1e-4 | slr0271 | G0:0022803 | <1e-4 | sl11318 | G0:0044425 | <1e-4 | slr1907 | G0:0005515 | 0.0447 |
| sl11004 | G0:0022411 | <1e-4 | slr1660  | G0:0043933 | <1e-4 | ssr1766 | G0:0022838 | <1e-4 | sl11509 | G0:0005575 | <1e-4 | sl10241 | G0:0005515 | 0.0447 |
| slr0144 | G0:0008150 | <1e-4 | ssr1528  | G0:0034654 | <1e-4 | sl10149 | G0:0043492 | <1e-4 | sl10588 | G0:0044446 | <1e-4 | slr1721 | G0:0005515 | 0.0447 |
| sl10218 | G0:0018130 | <1e-4 | sl10022  | G0:0006082 | <1e-4 | ssr1552 | G0:0015293 | <1e-4 | sl10157 | G0:0044444 | <1e-4 | sl11163 | G0:0005515 | 0.0447 |
| sl11002 | G0:0009132 | <1e-4 | slr7013  | G0:0051171 | <1e-4 | slr0232 | G0:0005342 | <1e-4 | slr1413 | G0:0044422 | <1e-4 | sl11306 | G0:0005515 | 0.0447 |
| slr2032 | G0:0034660 | <1e-4 | slr0442  | G0:0046483 | <1e-4 | ss15091 | G0:0016817 | <1e-4 | sl10783 | G0:0043226 | <1e-4 | sl10487 | G0:0005515 | 0.0447 |
| sl11942 | G0:0043436 | <1e-4 | sl10265  | G0:0048523 | <1e-4 | sl11340 | G0:0016817 | <1e-4 | sl10980 | G0:0044446 | <1e-4 | ssr2317 | G0:0005515 | 0.0447 |
| sl10482 | G0:0006066 | <1e-4 | sl10678  | G0:0043933 | <1e-4 | slr0887 | G0:0015267 | <1e-4 | ssr6099 | G0:0005575 | <1e-4 | sl17066 | G0:0005515 | 0.0447 |
| slr1958 | G0:0006766 | <1e-4 | sl111738 | G0:0060255 | <1e-4 | sl17089 | G0:0042623 | <1e-4 | sl10325 | G0:0005575 | <1e-4 | sl10742 | G0:0005515 | 0.0447 |
| slr0729 | G0:0072528 | <1e-4 | sl10911  | G0:0019637 | <1e-4 | sl11092 | G0:0015291 | <1e-4 | slr1290 | G0:0044464 | <1e-4 | sl11022 | G0:0005515 | 0.0447 |
| slr0305 | G0:0006811 | <1e-4 | slr1628  | G0:0090304 | <1e-4 | sl12015 | G0:0016746 | <1e-4 | slr5127 | G0:0044425 | <1e-4 | sl11414 | G0:0005515 | 0.0447 |
| slr1616 | G0:0006082 | <1e-4 | ssr5106  | G0:0046164 | <1e-4 | ss15096 | G0:0015075 | <1e-4 | slr1464 | G0:0005575 | <1e-4 | slr7013 | G0:0005515 | 0.0447 |
| slr1276 | G0:0051171 | <1e-4 | sl10062  | G0:0009892 | <1e-4 | slr7096 | G0:0022890 | <1e-4 | sl11109 | G0:0044444 | <1e-4 | sl11862 | G0:0005515 | 0.0447 |
| sl11495 | G0:0009260 | <1e-4 | slr0742  | G0:0009123 | <1e-4 | sl10905 | G0:0005342 | <1e-4 | slr0554 | G0:0005575 | <1e-4 | sl11217 | G0:0005515 | 0.0447 |
| slr8021 | G0:0009889 | <1e-4 | ssr7036  | G0:0009142 | <1e-4 | slr1047 | G0:0022838 | <1e-4 | slr0957 | G0:0044425 | <1e-4 | slr0890 | G0:0005515 | 0.0447 |
| ssr0759 | G0:0051179 | <1e-4 | ss13573  | G0:0009987 | <1e-4 | slr0060 | G0:0022891 | <1e-4 | slr0360 | G0:0043226 | <1e-4 | slr0505 | G0:0005515 | 0.0447 |
| sl16055 | G0:0031326 | <1e-4 | slr1658  | G0:0031640 | <1e-4 | slr1568 | G0:0016818 | <1e-4 | slr2092 | G0:0005575 | <1e-4 | slr1998 | G0:0005515 | 0.0447 |
| slr1258 | G0:0005996 | <1e-4 | sl10481  | G0:0050794 | <1e-4 | sl11477 | G0:0043167 | <1e-4 | slr0789 | G0:0044424 | <1e-4 | sl11638 | G0:0005515 | 0.0447 |
| sl10641 | G0:0006766 | <1e-4 | slr7073  | G0:0009260 | <1e-4 | sl10803 | G0:0022836 | <1e-4 | sl10310 | G0:0044425 | <1e-4 | slr0058 | G0:0005515 | 0.0447 |
| slr1917 | G0:0009141 | <1e-4 | sl15063  | G0:0042455 | <1e-4 | sl10505 | G0:0043167 | <1e-4 | slr1535 | G0:0043226 | <1e-4 | slr0971 | G0:0005515 | 0.0447 |
| slr6049 | G0:0001932 | <1e-4 | sl10102  | G0:0044248 | <1e-4 | slr1081 | G0:0016818 | <1e-4 | sl10658 | G0:0044422 | <1e-4 | slr0333 | G0:0005515 | 0.0447 |
| sl12015 | G0:0034641 | <1e-4 | slr0505  | G0:0009987 | <1e-4 | slr0431 | G0:0042623 | <1e-4 | sl11004 | G0:0044446 | <1e-4 | slr1103 | G0:0005515 | 0.0447 |
| sl10410 | G0:0006163 | <1e-4 | ssr1499  | G0:0042180 | <1e-4 | ss17021 | G0:0060089 | <1e-4 | slr1914 | G0:0043226 | <1e-4 | slr7096 | G0:0005515 | 0.0447 |
| ss10461 | G0:0019751 | <1e-4 | slr0872  | G0:0055114 | <1e-4 | sl11160 | G0:0016746 | <1e-4 | slr0334 | G0:0044425 | <1e-4 | slr0151 | G0:0005515 | 0.0447 |
| sl11925 | G0:0072524 | <1e-4 | slr6088  | G0:0019637 | <1e-4 | slr1301 | G0:0022891 | <1e-4 | ss10410 | G0:0044422 | <1e-4 | slr1378 | G0:0005515 | 0.0447 |
| slr6074 | G0:0006631 | <1e-4 | slr1178  | G0:0009165 | <1e-4 | slr0243 | G0:0060089 | <1e-4 | sl10858 | G0:0005575 | <1e-4 | ss17046 | G0:0005515 | 0.0447 |
| sl15067 | G0:0044255 | <1e-4 | sl10062  | G0:0044255 | <1e-4 | sl11765 | G0:0022891 | <1e-4 | sl11862 | G0:0044464 | <1e-4 | sl10498 | G0:0005515 | 0.0447 |
| slr6015 | G0:0031326 | <1e-4 | slr0169  | G0:0009126 | <1e-4 | ss15025 | G0:0015077 | <1e-4 | slr1275 | G0:0043226 | <1e-4 | slr6065 | G0:0005515 | 0.0447 |
| sl10742 | G0:0042455 | <1e-4 | sl11132  | G0:0050789 | <1e-4 | slr0876 | G0:0003674 | <1e-4 | sl10102 | G0:0005575 | <1e-4 | slr1178 | G0:0005515 | 0.0447 |
| slr6071 | G0:0050801 | <1e-4 | slr0888  | G0:0044106 | <1e-4 | slr1327 | G0:0015293 | <1e-4 | slr1266 | G0:0005575 | <1e-4 | sl10930 | G0:0005515 | 0.0447 |
| ss10832 | G0:0019752 | <1e-4 | slr0810  | G0:0016053 | <1e-4 | slr0885 | G0:0008171 | <1e-4 | slr6007 | G0:0044425 | <1e-4 | sl11252 | G0:0005515 | 0.0447 |
| slr0919 | G0:0044260 | <1e-4 | slr1116  | G0:0046164 | <1e-4 | slr1886 | G0:0015399 | <1e-4 | sl11960 | G0:0044422 | <1e-4 | slr1342 | G0:0005515 | 0.0447 |
| slr0913 | G0:0016053 | <1e-4 | sl11348  | G0:0006793 | <1e-4 | slr0554 | G0:0022890 | <1e-4 | slr0496 | G0:0044424 | <1e-4 | slr6072 | G0:0005515 | 0.0447 |
| sl10497 | G0:0034654 | <1e-4 | sl11396  | G0:0071841 | <1e-4 | slr6049 | G0:0016818 | <1e-4 | slr0442 | G0:0044425 | <1e-4 | slr1069 | G0:0005515 | 0.0447 |
| slr0408 | G0:0022411 | <1e-4 | sl11960  | G0:0044248 | <1e-4 | slr0262 | G0:0003674 | <1e-4 | sl10249 | G0:0044446 | <1e-4 | sl10008 | G0:0005515 | 0.0447 |
| sl10742 | G0:0009059 | <1e-4 | sl10325  | G0:0043648 | <1e-4 | slr1196 | G0:0016746 | <1e-4 | sl10503 | G0:0043226 | <1e-4 | slr0380 | G0:0005515 | 0.0447 |
| sl10238 | G0:0006066 | <1e-4 | ss15113  | G0:0019752 | <1e-4 | ss15025 | G0:0043167 | <1e-4 | slr0601 | G0:0005575 | <1e-4 | sl10168 | G0:0005515 | 0.0447 |
| sl10939 | G0:0008610 | <1e-4 | sl11675  | G0:0044106 | <1e-4 | sl10265 | G0:0015077 | <1e-4 | slr0195 | G0:0043226 | <1e-4 | sl12013 | G0:0005515 | 0.0447 |
| slr1773 | G0:0090304 | <1e-4 | slr1398  | G0:0050789 | <1e-4 | slr1918 | G0:0043167 | <1e-4 | ssr3300 | G0:0044446 | <1e-4 | sl11764 | G0:0005515 | 0.0447 |
| sl10410 | G0:0050896 | <1e-4 | slr0852  | G0:0043436 | <1e-4 | ssr3341 | G0:0022836 | <1e-4 | sl10696 | G0:0005575 | <1e-4 | slr7015 | G0:0005515 | 0.0447 |
| sl10479 | G0:0009165 | <1e-4 | slr0634  | G0:0045184 | <1e-4 | slr6072 | G0:0015405 | <1e-4 | sl10498 | G0:0005575 | <1e-4 | slr5023 | G0:0005515 | 0.0447 |
| sl11401 | G0:0019752 | <1e-4 | sl11880  | G0:0009308 | <1e-4 | ss15091 | G0:0015293 | <1e-4 | slr0333 | G0:0005575 | <1e-4 | slr1660 | G0:0005515 | 0.0447 |
| slr1082 | G0:0009142 | <1e-4 | slr1544  | G0:0065007 | <1e-4 | slr1263 | G0:0008171 | <1e-4 | slr0815 | G0:0044425 | <1e-4 | slr0695 | G0:0005515 | 0.0447 |
| slr0890 | G0:0044248 | <1e-4 | sl11613  | G0:0044003 | <1e-4 | sl11155 | G0:0022857 | <1e-4 | sl15128 | G0:0043226 | <1e-4 | sl11485 | G0:0005515 | 0.0447 |



|         |            |       |         |            |       |         |            |       |         |            |       |         |            |        |
|---------|------------|-------|---------|------------|-------|---------|------------|-------|---------|------------|-------|---------|------------|--------|
| s111915 | G0:0009150 | <1e-4 | s110995 | G0:0019637 | <1e-4 | s110225 | G0:0022803 | <1e-4 | s1r1919 | G0:0005575 | <1e-4 | s1r1273 | G0:0005515 | 0.0447 |
| s1r1152 | G0:0006793 | <1e-4 | s1r2073 | G0:0009889 | <1e-4 | s110007 | G0:0043492 | <1e-4 | s1r6080 | G0:0005575 | <1e-4 | s1r0362 | G0:0005515 | 0.0447 |
| s1r0609 | G0:0051234 | <1e-4 | s1r1391 | G0:0090304 | <1e-4 | s110189 | G0:0005342 | <1e-4 | ss17074 | G0:0044425 | <1e-4 | s1r7011 | G0:0005515 | 0.0447 |
| s110513 | G0:0010556 | <1e-4 | s1r1957 | G0:0044283 | <1e-4 | s111166 | G0:0005342 | <1e-4 | s117069 | G0:0044422 | <1e-4 | s110775 | G0:0005515 | 0.0447 |
| s1r0667 | G0:0009165 | <1e-4 | ssr3300 | G0:0019362 | <1e-4 | s111344 | G0:0015399 | <1e-4 | s1r1195 | G0:0044422 | <1e-4 | s111461 | G0:0005515 | 0.0447 |
| s1r0989 | G0:0072527 | <1e-4 | s110763 | G0:0009161 | <1e-4 | s1r1690 | G0:0043492 | <1e-4 | s110839 | G0:0044422 | <1e-4 | s1r1600 | G0:0005515 | 0.0447 |
| s1r0407 | G0:0009150 | <1e-4 | s110423 | G0:0044260 | <1e-4 | s1r0209 | G0:0022857 | <1e-4 | s1r1914 | G0:0044424 | <1e-4 | s1r1864 | G0:0005515 | 0.0447 |
| s1r0755 | G0:0051347 | <1e-4 | s1r7014 | G0:0009987 | <1e-4 | s1r5111 | G0:0015267 | <1e-4 | s1r0731 | G0:0043226 | <1e-4 | ssr2615 | G0:0005515 | 0.0446 |
| s1r1464 | G0:0090304 | <1e-4 | s110007 | G0:0006811 | <1e-4 | s110162 | G0:0015267 | <1e-4 | s1r1215 | G0:0043226 | <1e-4 | s1r1572 | G0:0005515 | 0.0446 |
| s110293 | G0:0009132 | <1e-4 | s1r0108 | G0:0019222 | <1e-4 | s110676 | G0:0043167 | <1e-4 | s1r0503 | G0:0044446 | <1e-4 | s111761 | G0:0005515 | 0.0446 |
| s115033 | G0:0060255 | <1e-4 | s1r2144 | G0:0046394 | <1e-4 | s110996 | G0:0005342 | <1e-4 | ssr2439 | G0:0044422 | <1e-4 | s110237 | G0:0005515 | 0.0446 |
| s1r1812 | G0:0001932 | <1e-4 | s1r6013 | G0:0006732 | <1e-4 | s115047 | G0:0022838 | <1e-4 | ss10312 | G0:0044464 | <1e-4 | s1r2144 | G0:0005515 | 0.0446 |
| s1r5013 | G0:0065007 | <1e-4 | s1r7010 | G0:0006091 | <1e-4 | s111632 | G0:0015075 | <1e-4 | s1r7012 | G0:0005575 | <1e-4 | s1r1964 | G0:0005515 | 0.0446 |
| ssr1473 | G0:0019222 | <1e-4 | ssr1041 | G0:0072528 | <1e-4 | s110101 | G0:0015267 | <1e-4 | ss11972 | G0:0044446 | <1e-4 | ssr3571 | G0:0005515 | 0.0446 |
| s110678 | G0:0042180 | <1e-4 | s110268 | G0:0045184 | <1e-4 | s110513 | G0:0016462 | <1e-4 | s111411 | G0:0044425 | <1e-4 | s1r2121 | G0:0005515 | 0.0446 |
| s110325 | G0:0009123 | <1e-4 | s110702 | G0:0009126 | <1e-4 | s1r1442 | G0:0043492 | <1e-4 | ss11004 | G0:0044422 | <1e-4 | s1r0294 | G0:0005515 | 0.0446 |
| s111495 | G0:0051234 | <1e-4 | s111241 | G0:0005996 | <1e-4 | s1r1612 | G0:0016462 | <1e-4 | ssr2975 | G0:0005575 | <1e-4 | s1r1436 | G0:0005515 | 0.0446 |
| ssr6085 | G0:0043170 | <1e-4 | ssr2047 | G0:0009056 | <1e-4 | s1r1546 | G0:0022803 | <1e-4 | s110822 | G0:0044444 | <1e-4 | s1r0386 | G0:0005515 | 0.0446 |
| s1r1544 | G0:0055086 | <1e-4 | s110376 | G0:0006720 | <1e-4 | s110355 | G0:0016741 | <1e-4 | ssr1558 | G0:0044422 | <1e-4 | s110007 | G0:0005515 | 0.0446 |
| ssr1698 | G0:0009057 | <1e-4 | s1r0740 | G0:0008150 | <1e-4 | s111784 | G0:0043492 | <1e-4 | s1r0919 | G0:0005575 | <1e-4 | s1r0348 | G0:0005515 | 0.0446 |
| s1r0695 | G0:0055114 | <1e-4 | ssr1951 | G0:0043933 | <1e-4 | s1r1768 | G0:0022890 | <1e-4 | s1r0489 | G0:0044424 | <1e-4 | s111315 | G0:0005515 | 0.0446 |
| s110069 | G0:0051347 | <1e-4 | s110661 | G0:0048522 | <1e-4 | s111265 | G0:0015077 | <1e-4 | s110314 | G0:0005575 | <1e-4 | s1r0204 | G0:0005515 | 0.0446 |
| s111717 | G0:0048878 | <1e-4 | s110525 | G0:0055114 | <1e-4 | s1r0594 | G0:0015405 | <1e-4 | ssr2439 | G0:0005575 | <1e-4 | s1r1885 | G0:0005515 | 0.0446 |
| s1r1290 | G0:0019752 | <1e-4 | s110354 | G0:0009165 | <1e-4 | s111304 | G0:0022836 | <1e-4 | s1r1773 | G0:0044424 | <1e-4 | s111613 | G0:0005515 | 0.0446 |
| s117063 | G0:0042451 | <1e-4 | ssr6099 | G0:0009987 | <1e-4 | s1r1150 | G0:0060089 | <1e-4 | s111241 | G0:0043226 | <1e-4 | s110177 | G0:0005515 | 0.0446 |
| s111495 | G0:0051186 | <1e-4 | s1r7082 | G0:0009260 | <1e-4 | s111681 | G0:0042623 | <1e-4 | s1r1050 | G0:0044425 | <1e-4 | s1r1667 | G0:0005515 | 0.0446 |
| s1r2111 | G0:0044248 | <1e-4 | s110543 | G0:0010556 | <1e-4 | ssr0335 | G0:0060089 | <1e-4 | s110861 | G0:0043234 | <1e-4 | s1r0006 | G0:0005515 | 0.0446 |
| s1r1261 | G0:0071840 | <1e-4 | s1r1259 | G0:0071840 | <1e-4 | s1r0144 | G0:0022890 | <1e-4 | s1r0195 | G0:0044444 | <1e-4 | s110645 | G0:0005515 | 0.0446 |
| s111049 | G0:0009394 | <1e-4 | s117069 | G0:0016054 | <1e-4 | s111285 | G0:0015399 | <1e-4 | s1r0519 | G0:0005575 | <1e-4 | ssr2755 | G0:0005515 | 0.0446 |
| ssr6086 | G0:0090304 | <1e-4 | s111891 | G0:0006631 | <1e-4 | s111373 | G0:0042623 | <1e-4 | s1r1407 | G0:0044444 | <1e-4 | s1r2073 | G0:0005515 | 0.0446 |
| s111247 | G0:0033013 | <1e-4 | s1r6101 | G0:0019751 | <1e-4 | s1r1438 | G0:0015291 | <1e-4 | s1r1851 | G0:0005575 | <1e-4 | s1r1230 | G0:0005515 | 0.0446 |
| s1r0755 | G0:0050801 | <1e-4 | s1r1970 | G0:0046907 | <1e-4 | ssr6083 | G0:0043167 | <1e-4 | s1r1287 | G0:0044464 | <1e-4 | s110497 | G0:0005515 | 0.0446 |
| ss10738 | G0:0044283 | <1e-4 | s110189 | G0:0042180 | <1e-4 | s1r0651 | G0:0016746 | <1e-4 | s110837 | G0:0043226 | <1e-4 | s110381 | G0:0005515 | 0.0446 |
| s110545 | G0:0009987 | <1e-4 | s1r0960 | G0:0006732 | <1e-4 | s1r1449 | G0:0016462 | <1e-4 | s1r5073 | G0:0044425 | <1e-4 | s111002 | G0:0005515 | 0.0446 |
| s1r0287 | G0:0046483 | <1e-4 | s1r1084 | G0:0051716 | <1e-4 | s111272 | G0:0022891 | <1e-4 | s1r0483 | G0:0044422 | <1e-4 | ssr1765 | G0:0005515 | 0.0446 |
| s1r5023 | G0:0006793 | <1e-4 | s1r0272 | G0:0052111 | <1e-4 | s111834 | G0:0043492 | <1e-4 | s1r0517 | G0:0044446 | <1e-4 | s110216 | G0:0005515 | 0.0446 |
| s1r0770 | G0:0009199 | <1e-4 | ss17038 | G0:0009144 | <1e-4 | s1r0505 | G0:0015075 | <1e-4 | ss11792 | G0:0044422 | <1e-4 | s110325 | G0:0005515 | 0.0446 |
| s1r1572 | G0:0051186 | <1e-4 | ss17042 | G0:0008610 | <1e-4 | ssr1256 | G0:0015267 | <1e-4 | s111581 | G0:0044422 | <1e-4 | s110085 | G0:0005515 | 0.0446 |
| s111769 | G0:0044003 | <1e-4 | s110737 | G0:0048522 | <1e-4 | s1r0650 | G0:0015077 | <1e-4 | s115132 | G0:0043226 | <1e-4 | s1r1210 | G0:0005515 | 0.0446 |
| s110647 | G0:0055114 | <1e-4 | s1r0865 | G0:0050794 | <1e-4 | s1r0204 | G0:0022892 | <1e-4 | s1r1261 | G0:0044422 | <1e-4 | s110243 | G0:0005515 | 0.0446 |
| s110283 | G0:0042451 | <1e-4 | s1r2004 | G0:0050896 | <1e-4 | s1r0888 | G0:0060089 | <1e-4 | ss17021 | G0:0043226 | <1e-4 | s111775 | G0:0004871 | 0.0445 |
| s1r6005 | G0:0019751 | <1e-4 | s110286 | G0:0031326 | <1e-4 | s110925 | G0:0022803 | <1e-4 | s1r0941 | G0:0044444 | <1e-4 | s111424 | G0:0004871 | 0.0445 |
| s1r1394 | G0:0043933 | <1e-4 | s111891 | G0:0034654 | <1e-4 | s1r0650 | G0:0015291 | <1e-4 | s110284 | G0:0044424 | <1e-4 | ss10832 | G0:0004871 | 0.0445 |
| s110639 | G0:0044248 | <1e-4 | s1r0870 | G0:0006576 | <1e-4 | s1r0976 | G0:0016462 | <1e-4 | s111630 | G0:0044444 | <1e-4 | s110103 | G0:0004871 | 0.0445 |
| ssr1552 | G0:0055114 | <1e-4 | s110268 | G0:0042455 | <1e-4 | s1r0771 | G0:0016462 | <1e-4 | s1r0806 | G0:0044464 | <1e-4 | s111902 | G0:0004871 | 0.0445 |
| s110310 | G0:0019751 | <1e-4 | s110588 | G0:0009056 | <1e-4 | s1r0362 | G0:0015291 | <1e-4 | s111390 | G0:0044424 | <1e-4 | s110238 | G0:0004871 | 0.0445 |
| s1r0082 | G0:0008610 | <1e-4 | s1r6074 | G0:0044248 | <1e-4 | s111926 | G0:0015291 | <1e-4 | s111995 | G0:0044425 | <1e-4 | s1r0208 | G0:0004871 | 0.0445 |
| s1r7083 | G0:0009124 | <1e-4 | s111218 | G0:0051347 | <1e-4 | s1r1800 | G0:0022891 | <1e-4 | s1r1098 | G0:0044464 | <1e-4 | s111250 | G0:0004871 | 0.0445 |
| s1r1484 | G0:0006220 | <1e-4 | s111388 | G0:0006732 | <1e-4 | s1r2018 | G0:0015267 | <1e-4 | s110780 | G0:0044424 | <1e-4 | s110702 | G0:0004871 | 0.0445 |
| s1r0519 | G0:0046394 | <1e-4 | s117078 | G0:0044248 | <1e-4 | s110913 | G0:0043167 | <1e-4 | s111691 | G0:0005575 | <1e-4 | s110269 | G0:0004871 | 0.0445 |
| s1r0869 | G0:0071842 | <1e-4 | s110442 | G0:0022607 | <1e-4 | s110930 | G0:0015077 | <1e-4 | ss12009 | G0:0044425 | <1e-4 | s110606 | G0:0004871 | 0.0445 |
| s1r0272 | G0:0009991 | <1e-4 | s1r1062 | G0:0019222 | <1e-4 | ssr3189 | G0:0043492 | <1e-4 | s111950 | G0:0043226 | <1e-4 | s110071 | G0:0004871 | 0.0445 |
| s1r6075 | G0:0006793 | <1e-4 | s110451 | G0:0043933 | <1e-4 | s111763 | G0:0008171 | <1e-4 | s1r5112 | G0:0043226 | <1e-4 | s1r0356 | G0:0008168 | 0.0442 |
| s111495 | G0:0072528 | <1e-4 | s1r0787 | G0:0019222 | <1e-4 | s111485 | G0:0022891 | <1e-4 | s110384 | G0:0043226 | <1e-4 | s110102 | G0:0008168 | 0.0442 |

|         |            |       |         |            |       |         |            |       |         |            |       |         |            |        |
|---------|------------|-------|---------|------------|-------|---------|------------|-------|---------|------------|-------|---------|------------|--------|
| slr5126 | G0:0009057 | <1e-4 | ssl2807 | G0:0051179 | <1e-4 | slr0238 | G0:0015405 | <1e-4 | sl10297 | G0:0044464 | <1e-4 | sl18004 | G0:0008168 | 0.0442 |
| sl11532 | G0:0019222 | <1e-4 | slr6004 | G0:0044003 | <1e-4 | slr0655 | G0:0016817 | <1e-4 | sl11203 | G0:0044446 | <1e-4 | sl15047 | G0:0008168 | 0.0442 |
| sl10905 | G0:0019751 | <1e-4 | ssr2781 | G0:0009260 | <1e-4 | slr1547 | G0:0022836 | <1e-4 | sl10846 | G0:0044424 | <1e-4 | ss12245 | G0:0008168 | 0.0442 |
| slr6101 | G0:0046483 | <1e-4 | ssr2551 | G0:0031326 | <1e-4 | sl11764 | G0:0015077 | <1e-4 | sl15006 | G0:0044446 | <1e-4 | sl10857 | G0:0008168 | 0.0442 |
| slr5024 | G0:0019751 | <1e-4 | sl11319 | G0:0006811 | <1e-4 | slr0863 | G0:0043492 | <1e-4 | ssr5117 | G0:0043226 | <1e-4 | slr0784 | G0:0008168 | 0.0442 |
| slr0172 | G0:0016054 | <1e-4 | sl10282 | G0:0043170 | <1e-4 | sl11563 | G0:0015291 | <1e-4 | sl17087 | G0:0005575 | <1e-4 | sl11853 | G0:0008168 | 0.0442 |
| slr0551 | G0:0006631 | <1e-4 | slr2071 | G0:0034641 | <1e-4 | slr7060 | G0:0042623 | <1e-4 | sl17055 | G0:0044444 | <1e-4 | slr1095 | G0:0008168 | 0.0442 |
| ssr3129 | G0:0019222 | <1e-4 | slr0249 | G0:0009161 | <1e-4 | sl15097 | G0:0015291 | <1e-4 | sl10451 | G0:0044446 | <1e-4 | sl11396 | G0:0008168 | 0.0442 |
| slr0692 | G0:0006091 | <1e-4 | slr1230 | G0:0051716 | <1e-4 | ssr3410 | G0:0016746 | <1e-4 | sl10678 | G0:0005575 | <1e-4 | slr1273 | G0:0008168 | 0.0442 |
| sl15004 | G0:0080090 | <1e-4 | sl10031 | G0:0009892 | <1e-4 | ssr1256 | G0:0015077 | <1e-4 | sl11239 | G0:0044446 | <1e-4 | slr0337 | G0:0008168 | 0.0442 |
| sl10930 | G0:0051186 | <1e-4 | sl10609 | G0:0031326 | <1e-4 | ss11690 | G0:0022892 | <1e-4 | slr0878 | G0:0044422 | <1e-4 | sl11766 | G0:0008168 | 0.0442 |
| sl11273 | G0:0065007 | <1e-4 | ss18005 | G0:0044283 | <1e-4 | sl10710 | G0:0022832 | <1e-4 | slr2117 | G0:0044424 | <1e-4 | slr1261 | G0:0008168 | 0.0442 |
| ss11577 | G0:0042455 | <1e-4 | sl18001 | G0:0055086 | <1e-4 | slr0300 | G0:0022832 | <1e-4 | slr7100 | G0:0044425 | <1e-4 | sl11863 | G0:0008168 | 0.0442 |
| ssr6083 | G0:0009892 | <1e-4 | sl11158 | G0:0071841 | <1e-4 | sl10933 | G0:0015077 | <1e-4 | slr0890 | G0:0005575 | <1e-4 | ss18003 | G0:0008168 | 0.0442 |
| sl15128 | G0:0080090 | <1e-4 | slr1999 | G0:0071842 | <1e-4 | ssr1407 | G0:0043492 | <1e-4 | sl11469 | G0:0044425 | <1e-4 | sl15044 | G0:0008168 | 0.0442 |
| sl11950 | G0:0006066 | <1e-4 | sl10525 | G0:0008610 | <1e-4 | sl11834 | G0:0016462 | <1e-4 | sl10843 | G0:0005575 | <1e-4 | ss15045 | G0:0008168 | 0.0442 |
| slr0728 | G0:0034654 | <1e-4 | sl10249 | G0:0009263 | <1e-4 | sl10414 | G0:0043167 | <1e-4 | slr1847 | G0:0044444 | <1e-4 | ss15095 | G0:0008168 | 0.0442 |
| sl11609 | G0:0034654 | <1e-4 | slr0959 | G0:0042180 | <1e-4 | sl10995 | G0:0022857 | <1e-4 | sl10101 | G0:0043226 | <1e-4 | slr0505 | G0:0008168 | 0.0442 |
| ss15103 | G0:0005996 | <1e-4 | sl11583 | G0:0034654 | <1e-4 | sl10172 | G0:0016817 | <1e-4 | slr0976 | G0:0044446 | <1e-4 | ss11004 | G0:0008168 | 0.0442 |
| sl15026 | G0:0009889 | <1e-4 | sl17034 | G0:0043436 | <1e-4 | sl10981 | G0:0003674 | <1e-4 | sl10756 | G0:0005575 | <1e-4 | sl11109 | G0:0008168 | 0.0442 |
| slr1194 | G0:0044260 | <1e-4 | ss10750 | G0:0044248 | <1e-4 | slr7057 | G0:0015405 | <1e-4 | slr1547 | G0:0044444 | <1e-4 | sl11378 | G0:0008168 | 0.0442 |
| sl16054 | G0:0009141 | <1e-4 | slr0196 | G0:0006733 | <1e-4 | slr1570 | G0:0015399 | <1e-4 | ss11707 | G0:0044446 | <1e-4 | slr0598 | G0:0008168 | 0.0442 |
| ss17045 | G0:0006091 | <1e-4 | sl10996 | G0:0019222 | <1e-4 | slr2060 | G0:0022892 | <1e-4 | ssr2060 | G0:0044446 | <1e-4 | ssr2611 | G0:0008168 | 0.0442 |
| sl11123 | G0:0034641 | <1e-4 | slr1203 | G0:0019752 | <1e-4 | ss13549 | G0:0042623 | <1e-4 | sl11132 | G0:0005575 | <1e-4 | sl11906 | G0:0008168 | 0.0442 |
| ss12420 | G0:0043933 | <1e-4 | slr0887 | G0:0009892 | <1e-4 | ssr5074 | G0:0022892 | <1e-4 | sl17065 | G0:0044422 | <1e-4 | slr1600 | G0:0008168 | 0.0442 |
| slr0157 | G0:0046164 | <1e-4 | sl10424 | G0:0043412 | <1e-4 | sl11528 | G0:0043167 | <1e-4 | slr1484 | G0:0044422 | <1e-4 | sl11401 | G0:0008168 | 0.0442 |
| sl10325 | G0:0046164 | <1e-4 | ss18008 | G0:0006576 | <1e-4 | slr1799 | G0:0016818 | <1e-4 | sl10793 | G0:0043226 | <1e-4 | sl10930 | G0:0008168 | 0.0442 |
| slr0272 | G0:0034654 | <1e-4 | sl10066 | G0:0019752 | <1e-4 | slr0172 | G0:0015077 | <1e-4 | ss15045 | G0:0044464 | <1e-4 | sl10762 | G0:0008168 | 0.0442 |
| ssr5092 | G0:0043412 | <1e-4 | sl11766 | G0:0008150 | <1e-4 | ss16092 | G0:0016741 | <1e-4 | slr0459 | G0:0044424 | <1e-4 | slr0959 | G0:0008168 | 0.0442 |
| slr0789 | G0:0009199 | <1e-4 | sl11902 | G0:0071496 | <1e-4 | slr0392 | G0:0015075 | <1e-4 | sl18033 | G0:0044425 | <1e-4 | sl18033 | G0:0008168 | 0.0442 |
| sl10740 | G0:0006082 | <1e-4 | sl10298 | G0:0051716 | <1e-4 | slr1397 | G0:0042623 | <1e-4 | sl10553 | G0:0044425 | <1e-4 | ss10312 | G0:0008168 | 0.0442 |
| sl10736 | G0:0046164 | <1e-4 | slr6038 | G0:0006766 | <1e-4 | ss15015 | G0:0022890 | <1e-4 | slr0458 | G0:0044446 | <1e-4 | sl10181 | G0:0008168 | 0.0442 |
| slr1546 | G0:0016053 | <1e-4 | slr1752 | G0:0009144 | <1e-4 | sl11853 | G0:0060089 | <1e-4 | ss10353 | G0:0044444 | <1e-4 | sl17047 | G0:0008168 | 0.0442 |
| sl11089 | G0:0009144 | <1e-4 | slr1378 | G0:0022607 | <1e-4 | slr1495 | G0:0016741 | <1e-4 | slr7071 | G0:0044424 | <1e-4 | ss15007 | G0:0008168 | 0.0442 |
| sl10269 | G0:0090304 | <1e-4 | sl10284 | G0:0009056 | <1e-4 | sl11289 | G0:0015267 | <1e-4 | slr0065 | G0:0005575 | <1e-4 | sl15062 | G0:0008168 | 0.0442 |
| slr0821 | G0:0055114 | <1e-4 | sl10294 | G0:0009987 | <1e-4 | sl12015 | G0:0016818 | <1e-4 | slr0587 | G0:0043226 | <1e-4 | slr0262 | G0:0008168 | 0.0442 |
| ssr3409 | G0:0009308 | <1e-4 | sl11906 | G0:0045184 | <1e-4 | sl11433 | G0:0003674 | <1e-4 | slr0263 | G0:0005575 | <1e-4 | sl10658 | G0:0008168 | 0.0442 |
| ssr5120 | G0:0009892 | <1e-4 | slr1468 | G0:0046394 | <1e-4 | sl18007 | G0:0016818 | <1e-4 | ss11417 | G0:0005575 | <1e-4 | sl11265 | G0:0008168 | 0.0442 |
| ssr5121 | G0:0019752 | <1e-4 | slr0613 | G0:0009057 | <1e-4 | sl10552 | G0:0022803 | <1e-4 | slr1591 | G0:0044446 | <1e-4 | sl10473 | G0:0008168 | 0.0442 |
| slr0345 | G0:0048878 | <1e-4 | sl10678 | G0:0044106 | <1e-4 | slr1385 | G0:0060089 | <1e-4 | slr2120 | G0:0044425 | <1e-4 | sl11773 | G0:0008168 | 0.0442 |
| slr0569 | G0:0031640 | <1e-4 | ssr2422 | G0:0006793 | <1e-4 | sl10606 | G0:0022891 | <1e-4 | sl11119 | G0:0044444 | <1e-4 | ss11464 | G0:0008168 | 0.0442 |
| ss17074 | G0:0019362 | <1e-4 | slr0498 | G0:0006631 | <1e-4 | sl11318 | G0:0022890 | <1e-4 | slr1196 | G0:0044425 | <1e-4 | sl10008 | G0:0008168 | 0.0442 |
| slr1544 | G0:0009056 | <1e-4 | slr0092 | G0:0034654 | <1e-4 | ss12009 | G0:0015291 | <1e-4 | sl11054 | G0:0044464 | <1e-4 | ss11792 | G0:0008168 | 0.0442 |
| sl10442 | G0:0051171 | <1e-4 | sl15109 | G0:0051347 | <1e-4 | sl10294 | G0:0022890 | <1e-4 | slr5023 | G0:0044422 | <1e-4 | slr1207 | G0:0008168 | 0.0442 |
| slr6049 | G0:0044248 | <1e-4 | slr0269 | G0:0045184 | <1e-4 | sl11486 | G0:0022838 | <1e-4 | slr1128 | G0:0005575 | <1e-4 | slr1907 | G0:0008168 | 0.0442 |
| slr1068 | G0:0034641 | <1e-4 | ss12920 | G0:0044275 | <1e-4 | sl17090 | G0:0022857 | <1e-4 | slr0109 | G0:0044464 | <1e-4 | sl11691 | G0:0008168 | 0.0442 |
| slr0607 | G0:0019752 | <1e-4 | slr5037 | G0:0042180 | <1e-4 | slr6021 | G0:0022803 | <1e-4 | slr7095 | G0:0044446 | <1e-4 | slr1923 | G0:0008168 | 0.0442 |
| sl11380 | G0:0043412 | <1e-4 | sl10752 | G0:0043549 | <1e-4 | ss11255 | G0:0016741 | <1e-4 | slr1627 | G0:0044424 | <1e-4 | slr0196 | G0:0008168 | 0.0442 |
| sl11726 | G0:0071554 | <1e-4 | ss10467 | G0:0048878 | <1e-4 | sl11609 | G0:0016746 | <1e-4 | slr1442 | G0:0043226 | <1e-4 | sl15097 | G0:0008168 | 0.0442 |
| sl10189 | G0:0071554 | <1e-4 | slr1935 | G0:0009132 | <1e-4 | slr0989 | G0:0022832 | <1e-4 | sl10763 | G0:0044464 | <1e-4 | slr0907 | G0:0008168 | 0.0442 |
| ssr2333 | G0:0080090 | <1e-4 | slr0751 | G0:0051171 | <1e-4 | sl11054 | G0:0016462 | <1e-4 | slr1215 | G0:0044424 | <1e-4 | ssr6020 | G0:0008168 | 0.0442 |
| sl10645 | G0:0009150 | <1e-4 | sl11086 | G0:0046164 | <1e-4 | sl11022 | G0:0016741 | <1e-4 | slr5077 | G0:0005575 | <1e-4 | ssr2422 | G0:0008168 | 0.0442 |
| slr6009 | G0:0051234 | <1e-4 | slr0360 | G0:0034654 | <1e-4 | ss13829 | G0:0022892 | <1e-4 | ss11377 | G0:0043226 | <1e-4 | sl10406 | G0:0008168 | 0.0442 |
| slr2004 | G0:0048522 | <1e-4 | sl10047 | G0:0051188 | <1e-4 | sl11866 | G0:0008171 | <1e-4 | sl11609 | G0:0044425 | <1e-4 | slr1998 | G0:0008168 | 0.0442 |

|          |            |       |         |            |       |          |            |       |         |            |       |         |            |        |
|----------|------------|-------|---------|------------|-------|----------|------------|-------|---------|------------|-------|---------|------------|--------|
| ssr2803  | G0:0046394 | <1e-4 | s111495 | G0:0055114 | <1e-4 | ssr3402  | G0:0015399 | <1e-4 | s111021 | G0:0044425 | <1e-4 | slr0619 | G0:0008168 | 0.0442 |
| slr0356  | G0:0080090 | <1e-4 | slr6067 | G0:0071840 | <1e-4 | slr0935  | G0:0022832 | <1e-4 | s111715 | G0:0044425 | <1e-4 | s110803 | G0:0008168 | 0.0442 |
| ssl13142 | G0:0044255 | <1e-4 | slr1544 | G0:0050896 | <1e-4 | slr0587  | G0:0016462 | <1e-4 | slr1384 | G0:0044422 | <1e-4 | s110710 | G0:0008168 | 0.0442 |
| slr1544  | G0:0048518 | <1e-4 | slr1614 | G0:0009141 | <1e-4 | ssl1417  | G0:0022857 | <1e-4 | slr0613 | G0:0044422 | <1e-4 | s111638 | G0:0008168 | 0.0442 |
| slr1875  | G0:0072524 | <1e-4 | s110827 | G0:0001932 | <1e-4 | ssl15113 | G0:0015291 | <1e-4 | s111063 | G0:0043226 | <1e-4 | slr0552 | G0:0008168 | 0.0442 |
| slr0360  | G0:0022607 | <1e-4 | ssr2554 | G0:0043933 | <1e-4 | slr0468  | G0:0043167 | <1e-4 | slr6067 | G0:0044424 | <1e-4 | ssl2781 | G0:0008168 | 0.0442 |
| slr0489  | G0:0022607 | <1e-4 | slr1052 | G0:0005996 | <1e-4 | s111188  | G0:0043492 | <1e-4 | s117062 | G0:0044422 | <1e-4 | ssl1520 | G0:0008168 | 0.0442 |
| ssr1473  | G0:0001932 | <1e-4 | s112013 | G0:0051179 | <1e-4 | slr6072  | G0:0022891 | <1e-4 | slr6006 | G0:0044446 | <1e-4 | s111217 | G0:0008168 | 0.0442 |
| s110382  | G0:0009892 | <1e-4 | slr1383 | G0:0044003 | <1e-4 | s111926  | G0:0022857 | <1e-4 | slr1812 | G0:0044424 | <1e-4 | slr2105 | G0:0008168 | 0.0442 |
| s110981  | G0:0006082 | <1e-4 | slr1449 | G0:0043436 | <1e-4 | s110177  | G0:0015075 | <1e-4 | slr1097 | G0:0044424 | <1e-4 | s117043 | G0:0008168 | 0.0442 |
| s110732  | G0:0050794 | <1e-4 | slr1964 | G0:0051246 | <1e-4 | slr5119  | G0:0015399 | <1e-4 | slr6081 | G0:0005575 | <1e-4 | sg10001 | G0:0008168 | 0.0442 |
| slr1612  | G0:0006721 | <1e-4 | slr1704 | G0:0060255 | <1e-4 | s110085  | G0:0015291 | <1e-4 | slr6009 | G0:0043226 | <1e-4 | s110727 | G0:0008168 | 0.0442 |
| slr1863  | G0:0009056 | <1e-4 | slr1915 | G0:0050896 | <1e-4 | slr1911  | G0:0022832 | <1e-4 | s111611 | G0:0044464 | <1e-4 | slr7082 | G0:0008168 | 0.0442 |
| s110843  | G0:0010468 | <1e-4 | ssl1377 | G0:0048518 | <1e-4 | ssr0102  | G0:0022890 | <1e-4 | slr0269 | G0:0044446 | <1e-4 | slr1576 | G0:0008168 | 0.0442 |
| slr0789  | G0:0046394 | <1e-4 | ssr0332 | G0:0019222 | <1e-4 | s110623  | G0:0015267 | <1e-4 | slr0195 | G0:0044464 | <1e-4 | s111511 | G0:0008168 | 0.0442 |
| s116054  | G0:0034660 | <1e-4 | slr0645 | G0:0080090 | <1e-4 | slr2071  | G0:0022892 | <1e-4 | sm10011 | G0:0044425 | <1e-4 | slr6073 | G0:0008168 | 0.0442 |
| slr1376  | G0:0022411 | <1e-4 | slr0483 | G0:0044248 | <1e-4 | s117065  | G0:0022803 | <1e-4 | ssr0759 | G0:0044464 | <1e-4 | s110518 | G0:0008168 | 0.0442 |
| slr0871  | G0:0009144 | <1e-4 | slr0601 | G0:0031640 | <1e-4 | s111201  | G0:0022803 | <1e-4 | slr2052 | G0:0044422 | <1e-4 | slr2101 | G0:0008168 | 0.0442 |
| s110539  | G0:0006220 | <1e-4 | slr0914 | G0:0046164 | <1e-4 | s111582  | G0:0022838 | <1e-4 | slr0023 | G0:0044444 | <1e-4 | slr0960 | G0:0008168 | 0.0442 |
| slr0416  | G0:0051171 | <1e-4 | s110786 | G0:0043933 | <1e-4 | s110685  | G0:0015075 | <1e-4 | slr0397 | G0:0044464 | <1e-4 | slr7096 | G0:0008168 | 0.0442 |
| s111049  | G0:0018130 | <1e-4 | ssr3129 | G0:0009123 | <1e-4 | slr1398  | G0:0015405 | <1e-4 | s110863 | G0:0005575 | <1e-4 | ssr6048 | G0:0008168 | 0.0442 |
| ssr1528  | G0:0051818 | <1e-4 | slr0579 | G0:0044106 | <1e-4 | s110524  | G0:0015075 | <1e-4 | s111469 | G0:0044444 | <1e-4 | ssl2717 | G0:0008168 | 0.0442 |
| slr1215  | G0:0006725 | <1e-4 | slr1721 | G0:0031326 | <1e-4 | slr0723  | G0:0015293 | <1e-4 | ssr0109 | G0:0005575 | <1e-4 | s110913 | G0:0008168 | 0.0442 |
| s111119  | G0:0051246 | <1e-4 | s110552 | G0:0090304 | <1e-4 | slr8044  | G0:0016746 | <1e-4 | slr0725 | G0:0005575 | <1e-4 | s117062 | G0:0008168 | 0.0442 |
| ssr0335  | G0:0009987 | <1e-4 | slr0579 | G0:0009309 | <1e-4 | s111654  | G0:0015075 | <1e-4 | ssr5011 | G0:0044422 | <1e-4 | s112013 | G0:0008168 | 0.0442 |
| s111735  | G0:0006091 | <1e-4 | slr0498 | G0:0042180 | <1e-4 | s110602  | G0:0015077 | <1e-4 | slr0552 | G0:0005575 | <1e-4 | slr1677 | G0:0008168 | 0.0442 |
| ssl13573 | G0:0042180 | <1e-4 | slr1472 | G0:0071496 | <1e-4 | slr0699  | G0:0043167 | <1e-4 | slr1568 | G0:0044425 | <1e-4 | slr0821 | G0:0008168 | 0.0442 |
| slr0305  | G0:0006720 | <1e-4 | s111775 | G0:0048523 | <1e-4 | slr1170  | G0:0016817 | <1e-4 | ssl5091 | G0:0005575 | <1e-4 | ssl2148 | G0:0008168 | 0.0442 |
| s110216  | G0:0044275 | <1e-4 | slr1215 | G0:0009161 | <1e-4 | ssr2142  | G0:0022892 | <1e-4 | ssl5114 | G0:0005575 | <1e-4 | slr7059 | G0:0008168 | 0.0442 |
| slr0888  | G0:0050896 | <1e-4 | slr0815 | G0:0080090 | <1e-4 | slr1365  | G0:0015267 | <1e-4 | slr5017 | G0:0044422 | <1e-4 | ssr2912 | G0:0008168 | 0.0442 |
| s110482  | G0:0055086 | <1e-4 | s111359 | G0:0034641 | <1e-4 | slr1288  | G0:0022857 | <1e-4 | slr0345 | G0:0044424 | <1e-4 | s115061 | G0:0008168 | 0.0442 |
| s110793  | G0:0044275 | <1e-4 | slr5053 | G0:0006220 | <1e-4 | slr1618  | G0:0016746 | <1e-4 | s110183 | G0:0044446 | <1e-4 | slr1863 | G0:0008168 | 0.0442 |
| slr7096  | G0:0009259 | <1e-4 | slr5053 | G0:0071840 | <1e-4 | s111304  | G0:0060089 | <1e-4 | s110997 | G0:0005575 | <1e-4 | s115046 | G0:0008168 | 0.0442 |
| slr7023  | G0:0055086 | <1e-4 | slr2110 | G0:0009199 | <1e-4 | s111530  | G0:0015405 | <1e-4 | slr1537 | G0:0044424 | <1e-4 | s111862 | G0:0008168 | 0.0442 |
| slr6013  | G0:0051188 | <1e-4 | s110545 | G0:0051716 | <1e-4 | s110737  | G0:0005342 | <1e-4 | s111201 | G0:0044422 | <1e-4 | slr5119 | G0:0008168 | 0.0442 |
| ssl5015  | G0:0006733 | <1e-4 | ssl2420 | G0:0008150 | <1e-4 | s111995  | G0:0022803 | <1e-4 | slr0637 | G0:0044444 | <1e-4 | slr6101 | G0:0008168 | 0.0442 |
| s111054  | G0:0009262 | <1e-4 | ssl3383 | G0:0010556 | <1e-4 | slr1306  | G0:0016818 | <1e-4 | slr0789 | G0:0044464 | <1e-4 | ssr3189 | G0:0008168 | 0.0442 |
| slr1530  | G0:0019751 | <1e-4 | s110886 | G0:0046394 | <1e-4 | ssr5011  | G0:0015267 | <1e-4 | slr0569 | G0:0005575 | <1e-4 | s111757 | G0:0008168 | 0.0442 |
| ssr2787  | G0:0006091 | <1e-4 | ssr6019 | G0:0006793 | <1e-4 | s115034  | G0:0003674 | <1e-4 | ssl5008 | G0:0044422 | <1e-4 | slr0388 | G0:0008168 | 0.0442 |
| s111891  | G0:0022607 | <1e-4 | s111942 | G0:0006576 | <1e-4 | slr6033  | G0:0022857 | <1e-4 | slr0711 | G0:0005575 | <1e-4 | slr1927 | G0:0008168 | 0.0442 |
| ssr6099  | G0:0019222 | <1e-4 | s110584 | G0:0050896 | <1e-4 | s110448  | G0:0022890 | <1e-4 | s110062 | G0:0005575 | <1e-4 | ssl2471 | G0:0008168 | 0.0442 |
| s111912  | G0:0045184 | <1e-4 | slr1790 | G0:0044248 | <1e-4 | slr1143  | G0:0043492 | <1e-4 | slr0360 | G0:0005575 | <1e-4 | s110498 | G0:0008168 | 0.0442 |
| s110608  | G0:0019751 | <1e-4 | s111304 | G0:0034660 | <1e-4 | ssr2551  | G0:0015075 | <1e-4 | ssl1046 | G0:0005575 | <1e-4 | s110815 | G0:0008168 | 0.0442 |
| slr1493  | G0:0044271 | <1e-4 | s110857 | G0:0008150 | <1e-4 | s110803  | G0:0016818 | <1e-4 | s110853 | G0:0044424 | <1e-4 | s110811 | G0:0008168 | 0.0442 |
| s110272  | G0:0046128 | <1e-4 | s110301 | G0:0006163 | <1e-4 | ssr1558  | G0:0022838 | <1e-4 | slr0913 | G0:0043226 | <1e-4 | s111884 | G0:0008168 | 0.0442 |
| s115006  | G0:0006766 | <1e-4 | slr1127 | G0:0042455 | <1e-4 | slr0157  | G0:0022890 | <1e-4 | s110623 | G0:0044444 | <1e-4 | s115090 | G0:0008168 | 0.0442 |
| slr1827  | G0:0006811 | <1e-4 | s110008 | G0:0055086 | <1e-4 | slr0642  | G0:0015293 | <1e-4 | slr1235 | G0:0044464 | <1e-4 | s117063 | G0:0008168 | 0.0442 |
| s111469  | G0:0031323 | <1e-4 | slr6087 | G0:0090304 | <1e-4 | slr1230  | G0:0022891 | <1e-4 | ssl2064 | G0:0005575 | <1e-4 | slr7011 | G0:0008168 | 0.0442 |
| s110031  | G0:0050896 | <1e-4 | s110736 | G0:0071840 | <1e-4 | ssl5015  | G0:0016462 | <1e-4 | slr1143 | G0:0043226 | <1e-4 | ssl0738 | G0:0008168 | 0.0442 |
| slr7023  | G0:0022607 | <1e-4 | s110545 | G0:0006091 | <1e-4 | ssr1473  | G0:0015077 | <1e-4 | slr0907 | G0:0044422 | <1e-4 | slr7080 | G0:0008168 | 0.0442 |
| s110007  | G0:0016053 | <1e-4 | s110319 | G0:0052111 | <1e-4 | s117043  | G0:0022857 | <1e-4 | slr1343 | G0:0044464 | <1e-4 | slr7012 | G0:0008168 | 0.0442 |
| slr1210  | G0:0043170 | <1e-4 | ssr7035 | G0:0009117 | <1e-4 | sg10001  | G0:0015293 | <1e-4 | s111696 | G0:0043226 | <1e-4 | ssr2049 | G0:0003723 | 0.0435 |
| slr1270  | G0:0065007 | <1e-4 | s110647 | G0:0019751 | <1e-4 | slr0172  | G0:0022857 | <1e-4 | ssr1951 | G0:0044424 | <1e-4 | slr0491 | G0:0003723 | 0.0435 |
| slr6081  | G0:0072527 | <1e-4 | ssr3300 | G0:0043412 | <1e-4 | slr1378  | G0:0022832 | <1e-4 | slr1152 | G0:0043226 | <1e-4 | slr1385 | G0:0003723 | 0.0435 |

|          |            |       |         |            |       |         |            |       |         |            |       |         |            |        |
|----------|------------|-------|---------|------------|-------|---------|------------|-------|---------|------------|-------|---------|------------|--------|
| ssl7039  | G0:0009056 | <1e-4 | ssr6027 | G0:0060255 | <1e-4 | sl10843 | G0:0016817 | <1e-4 | slr0731 | G0:0044464 | <1e-4 | ssl1255 | G0:0003723 | 0.0435 |
| ssl15015 | G0:0044248 | <1e-4 | sl10176 | G0:0010556 | <1e-4 | sl11757 | G0:0005342 | <1e-4 | slr0587 | G0:0044425 | <1e-4 | sl10661 | G0:0003723 | 0.0435 |
| sl10688  | G0:0009132 | <1e-4 | sl11222 | G0:0022411 | <1e-4 | sl10423 | G0:0042623 | <1e-4 | ssr3154 | G0:0044422 | <1e-4 | slr1603 | G0:0003723 | 0.0435 |
| slr0552  | G0:0016054 | <1e-4 | ssr1041 | G0:0051188 | <1e-4 | slr0729 | G0:0022891 | <1e-4 | sl10505 | G0:0005575 | <1e-4 | sl10242 | G0:0017111 | 0.0432 |
| sl10931  | G0:0051188 | <1e-4 | sl15026 | G0:0045184 | <1e-4 | sl10606 | G0:0022857 | <1e-4 | ssl2009 | G0:0044446 | <1e-4 | sl10688 | G0:0005975 | 0.0429 |
| slr0148  | G0:0006082 | <1e-4 | slr1513 | G0:0044003 | <1e-4 | slr1394 | G0:0008171 | <1e-4 | slr0784 | G0:0044422 | <1e-4 | slr0207 | G0:0005975 | 0.0429 |
| slr0755  | G0:0016053 | <1e-4 | sl10181 | G0:0009199 | <1e-4 | slr1690 | G0:0016746 | <1e-4 | ssl0294 | G0:0044464 | <1e-4 | sl10319 | G0:0005975 | 0.0429 |
| slr0787  | G0:0008150 | <1e-4 | slr1886 | G0:0019222 | <1e-4 | slr1907 | G0:0016817 | <1e-4 | sl10788 | G0:0044425 | <1e-4 | slr0957 | G0:0005975 | 0.0429 |
| sl10160  | G0:0044282 | <1e-4 | slr0964 | G0:0072521 | <1e-4 | slr0172 | G0:0015267 | <1e-4 | slr1107 | G0:0044464 | <1e-4 | sl10572 | G0:0005975 | 0.0429 |
| slr0299  | G0:0051347 | <1e-4 | slr1110 | G0:0046164 | <1e-4 | ssr6032 | G0:0003674 | <1e-4 | slr1495 | G0:0005575 | <1e-4 | sl11659 | G0:0005975 | 0.0429 |
| sl11638  | G0:0006732 | <1e-4 | slr1977 | G0:0071842 | <1e-4 | ssr6003 | G0:0043492 | <1e-4 | slr1851 | G0:0043226 | <1e-4 | ssr2009 | G0:0005975 | 0.0429 |
| slr0058  | G0:0044275 | <1e-4 | sl11203 | G0:0071840 | <1e-4 | slr7060 | G0:0022838 | <1e-4 | ssr3571 | G0:0005575 | <1e-4 | slr0975 | G0:0005975 | 0.0429 |
| sl15034  | G0:0001932 | <1e-4 | ssr7084 | G0:0090304 | <1e-4 | slr0398 | G0:0016741 | <1e-4 | sl10024 | G0:0005575 | <1e-4 | slr0801 | G0:0005975 | 0.0429 |
| slr1956  | G0:0019637 | <1e-4 | slr0179 | G0:0006753 | <1e-4 | sl10609 | G0:0022857 | <1e-4 | slr1679 | G0:0044444 | <1e-4 | slr0169 | G0:0005975 | 0.0429 |
| sl10283  | G0:0046164 | <1e-4 | slr0291 | G0:0006066 | <1e-4 | sl10185 | G0:0022857 | <1e-4 | sl11680 | G0:0043226 | <1e-4 | slr1338 | G0:0005975 | 0.0429 |
| sl15132  | G0:0080090 | <1e-4 | sl10803 | G0:0050794 | <1e-4 | slr0285 | G0:0016746 | <1e-4 | sl10871 | G0:0043226 | <1e-4 | sl10281 | G0:0005975 | 0.0429 |
| sl10272  | G0:0090304 | <1e-4 | sl10160 | G0:0009141 | <1e-4 | slr1493 | G0:0022836 | <1e-4 | slr0480 | G0:0005575 | <1e-4 | sl11411 | G0:0005975 | 0.0429 |
| sl10208  | G0:0016053 | <1e-4 | sl11155 | G0:0022607 | <1e-4 | sl10243 | G0:0022832 | <1e-4 | slr1660 | G0:0005575 | <1e-4 | sl11267 | G0:0005975 | 0.0429 |
| sl15032  | G0:0006091 | <1e-4 | ssr3189 | G0:0043436 | <1e-4 | slr0545 | G0:0015293 | <1e-4 | sl10982 | G0:0005575 | <1e-4 | slr1070 | G0:0005975 | 0.0429 |
| ssr2060  | G0:0042180 | <1e-4 | sl11640 | G0:0009308 | <1e-4 | sl10863 | G0:0015075 | <1e-4 | ss10352 | G0:0005575 | <1e-4 | slr1809 | G0:0005975 | 0.0429 |
| sl10552  | G0:0009987 | <1e-4 | slr0619 | G0:0072528 | <1e-4 | sl11272 | G0:0016817 | <1e-4 | slr1189 | G0:0044464 | <1e-4 | slr0605 | G0:0005975 | 0.0429 |
| slr0869  | G0:0009056 | <1e-4 | slr1362 | G0:0009056 | <1e-4 | sl11939 | G0:0016462 | <1e-4 | slr2012 | G0:0044444 | <1e-4 | slr0924 | G0:0005975 | 0.0429 |
| slr2018  | G0:0050789 | <1e-4 | slr0491 | G0:0006066 | <1e-4 | slr7102 | G0:0022891 | <1e-4 | sl11381 | G0:0044446 | <1e-4 | sl10980 | G0:0005975 | 0.0429 |
| sl10325  | G0:0060255 | <1e-4 | sl11766 | G0:0044283 | <1e-4 | slr0971 | G0:0042623 | <1e-4 | slr1681 | G0:0044422 | <1e-4 | slr0149 | G0:0005975 | 0.0429 |
| ssr5011  | G0:0006091 | <1e-4 | sl10314 | G0:0071840 | <1e-4 | slr7024 | G0:0015291 | <1e-4 | slr0780 | G0:0005575 | <1e-4 | slr7024 | G0:0005975 | 0.0429 |
| sl10478  | G0:0009150 | <1e-4 | ssr2972 | G0:0034641 | <1e-4 | ssr5092 | G0:0015075 | <1e-4 | slr0181 | G0:0044446 | <1e-4 | slr1258 | G0:0005975 | 0.0429 |
| sl17064  | G0:0010468 | <1e-4 | sl10710 | G0:0042455 | <1e-4 | sl11218 | G0:0022857 | <1e-4 | slr0699 | G0:0005575 | <1e-4 | sl11654 | G0:0005975 | 0.0429 |
| sl10238  | G0:0050789 | <1e-4 | slr7083 | G0:0071496 | <1e-4 | slr6028 | G0:0005342 | <1e-4 | ssr2553 | G0:0044464 | <1e-4 | sl10810 | G0:0005975 | 0.0429 |
| sl11004  | G0:0071842 | <1e-4 | slr1847 | G0:0046128 | <1e-4 | slr0416 | G0:0022832 | <1e-4 | sl11757 | G0:0044446 | <1e-4 | slr0654 | G0:0005975 | 0.0429 |
| sl12015  | G0:0009394 | <1e-4 | sl11611 | G0:0055086 | <1e-4 | slr1958 | G0:0008171 | <1e-4 | slr1470 | G0:0044424 | <1e-4 | sl10188 | G0:0005975 | 0.0429 |
| sl15033  | G0:0001932 | <1e-4 | slr1406 | G0:0043170 | <1e-4 | slr0613 | G0:0015077 | <1e-4 | ssr2047 | G0:0005575 | <1e-4 | ssr1528 | G0:0005975 | 0.0429 |
| sl15097  | G0:0010556 | <1e-4 | slr7071 | G0:0009260 | <1e-4 | slr1913 | G0:0022803 | <1e-4 | slr7098 | G0:0005575 | <1e-4 | sl11021 | G0:0005975 | 0.0429 |
| ssl13142 | G0:0006721 | <1e-4 | sl10071 | G0:0050789 | <1e-4 | sl11400 | G0:0003674 | <1e-4 | slr0204 | G0:0044464 | <1e-4 | slr0989 | G0:0005975 | 0.0429 |
| slr1571  | G0:0009263 | <1e-4 | slr0930 | G0:0019637 | <1e-4 | slr2103 | G0:0022891 | <1e-4 | ssr1765 | G0:0043226 | <1e-4 | sl10189 | G0:0005975 | 0.0429 |
| slr6039  | G0:0048522 | <1e-4 | slr1074 | G0:0006082 | <1e-4 | slr0914 | G0:0005342 | <1e-4 | ssr1041 | G0:0044425 | <1e-4 | sl10911 | G0:0005975 | 0.0429 |
| slr2003  | G0:0043170 | <1e-4 | ssl2064 | G0:0051234 | <1e-4 | slr1178 | G0:0008171 | <1e-4 | sl11442 | G0:0044425 | <1e-4 | slr0468 | G0:0005975 | 0.0429 |
| sl17066  | G0:0009056 | <1e-4 | slr0108 | G0:0016052 | <1e-4 | ssr2551 | G0:0022857 | <1e-4 | slr6068 | G0:0044446 | <1e-4 | slr0060 | G0:0005975 | 0.0429 |
| sl10376  | G0:0055082 | <1e-4 | slr0204 | G0:0009987 | <1e-4 | sl11219 | G0:0022832 | <1e-4 | sl11656 | G0:0005575 | <1e-4 | sl10297 | G0:0005975 | 0.0429 |
| sl10532  | G0:0006066 | <1e-4 | slr2071 | G0:0045184 | <1e-4 | sl11063 | G0:0060089 | <1e-4 | slr6063 | G0:0044446 | <1e-4 | slr1658 | G0:0005975 | 0.0429 |
| slr6081  | G0:0065007 | <1e-4 | slr1270 | G0:0044106 | <1e-4 | slr6073 | G0:0022803 | <1e-4 | slr1603 | G0:0044424 | <1e-4 | slr1977 | G0:0005975 | 0.0429 |
| sl10410  | G0:0019751 | <1e-4 | sl11252 | G0:0042451 | <1e-4 | sl11608 | G0:0003674 | <1e-4 | ssr2422 | G0:0044444 | <1e-4 | sl11730 | G0:0005975 | 0.0429 |
| slr0192  | G0:0051179 | <1e-4 | sl11509 | G0:0031323 | <1e-4 | slr6044 | G0:0016817 | <1e-4 | slr0303 | G0:0044424 | <1e-4 | slr1303 | G0:0005975 | 0.0429 |
| ssr3122  | G0:0031323 | <1e-4 | ssr3572 | G0:0052188 | <1e-4 | slr1920 | G0:0042623 | <1e-4 | slr5111 | G0:0044425 | <1e-4 | slr0789 | G0:0005975 | 0.0429 |
| ssl2733  | G0:0009260 | <1e-4 | slr0845 | G0:0006793 | <1e-4 | slr7015 | G0:0016818 | <1e-4 | ssr7072 | G0:0044424 | <1e-4 | sl10658 | G0:0016740 | 0.0428 |
| slr1062  | G0:0072528 | <1e-4 | slr6014 | G0:0019752 | <1e-4 | slr1864 | G0:0015405 | <1e-4 | slr0487 | G0:0044464 | <1e-4 | slr1195 | G0:0016740 | 0.0428 |
| slr0509  | G0:0009059 | <1e-4 | sl11512 | G0:0090304 | <1e-4 | sl11765 | G0:0015075 | <1e-4 | sl11040 | G0:0005575 | <1e-4 | sl11132 | G0:0016740 | 0.0428 |
| slr1429  | G0:0042180 | <1e-4 | slr1677 | G0:0010556 | <1e-4 | sl10811 | G0:0022838 | <1e-4 | sl10414 | G0:0044422 | <1e-4 | slr1660 | G0:0016740 | 0.0428 |
| slr1658  | G0:0048519 | <1e-4 | ssr2553 | G0:0043933 | <1e-4 | slr2101 | G0:0022857 | <1e-4 | sl10751 | G0:0044425 | <1e-4 | sl11764 | G0:0016740 | 0.0428 |
| slr6091  | G0:0019222 | <1e-4 | sl10448 | G0:0044255 | <1e-4 | sl11511 | G0:0016817 | <1e-4 | ss12920 | G0:0044424 | <1e-4 | slr2105 | G0:0016740 | 0.0428 |
| slr1593  | G0:0046164 | <1e-4 | ssr1766 | G0:0051234 | <1e-4 | sl11942 | G0:0043492 | <1e-4 | sl10545 | G0:0044422 | <1e-4 | sl11062 | G0:0016740 | 0.0428 |
| slr1082  | G0:0072524 | <1e-4 | slr6008 | G0:0009165 | <1e-4 | sl17063 | G0:0015405 | <1e-4 | sl11241 | G0:0044464 | <1e-4 | slr1534 | G0:0016740 | 0.0428 |
| ssl0350  | G0:0022607 | <1e-4 | slr0885 | G0:0009308 | <1e-4 | slr0326 | G0:0022890 | <1e-4 | sl10615 | G0:0044464 | <1e-4 | slr1068 | G0:0016740 | 0.0428 |
| slr0975  | G0:0071840 | <1e-4 | slr1541 | G0:0051179 | <1e-4 | sl11652 | G0:0015405 | <1e-4 | slr7011 | G0:0044425 | <1e-4 | ssl2420 | G0:0016740 | 0.0428 |
| slr1110  | G0:0051234 | <1e-4 | ssr8047 | G0:0044255 | <1e-4 | sl11563 | G0:0060089 | <1e-4 | sl11510 | G0:0044446 | <1e-4 | sl10048 | G0:0016740 | 0.0428 |

|         |            |       |         |            |       |         |            |       |         |            |       |         |            |        |
|---------|------------|-------|---------|------------|-------|---------|------------|-------|---------|------------|-------|---------|------------|--------|
| s11858  | G0:0031326 | <1e-4 | s1r1425 | G0:0009124 | <1e-4 | ss11263 | G0:0015075 | <1e-4 | s1r0006 | G0:0044464 | <1e-4 | s110241 | G0:0016740 | 0.0428 |
| s1r2038 | G0:0046907 | <1e-4 | s1r1519 | G0:0016053 | <1e-4 | ss17074 | G0:0015267 | <1e-4 | s1r0362 | G0:0044444 | <1e-4 | s1r1600 | G0:0016740 | 0.0428 |
| s1r7026 | G0:0080090 | <1e-4 | s111510 | G0:0051716 | <1e-4 | s1r0667 | G0:0016817 | <1e-4 | s110325 | G0:0044422 | <1e-4 | s1r1923 | G0:0016740 | 0.0428 |
| s110565 | G0:0016052 | <1e-4 | s110328 | G0:0006066 | <1e-4 | s1r1668 | G0:0022892 | <1e-4 | s111763 | G0:0044422 | <1e-4 | s1r1207 | G0:0016740 | 0.0428 |
| ss12069 | G0:0010468 | <1e-4 | s1r0362 | G0:0006766 | <1e-4 | s111062 | G0:0015267 | <1e-4 | s1r6045 | G0:0044422 | <1e-4 | s1r0264 | G0:0016740 | 0.0428 |
| s111218 | G0:0006811 | <1e-4 | s1r0109 | G0:0009165 | <1e-4 | s111832 | G0:0015405 | <1e-4 | s1r0348 | G0:0005575 | <1e-4 | s110473 | G0:0016740 | 0.0428 |
| s111040 | G0:0019222 | <1e-4 | ssr7079 | G0:0048519 | <1e-4 | s1r1104 | G0:0022892 | <1e-4 | s110780 | G0:0044446 | <1e-4 | s1r6100 | G0:0016740 | 0.0428 |
| s111511 | G0:0019219 | <1e-4 | s1r7026 | G0:0019219 | <1e-4 | s110023 | G0:0016741 | <1e-4 | s112013 | G0:0005575 | <1e-4 | s1r1813 | G0:0016740 | 0.0428 |
| s1r1114 | G0:0009199 | <1e-4 | s110803 | G0:0043412 | <1e-4 | ss12595 | G0:0016817 | <1e-4 | s1r0364 | G0:0044422 | <1e-4 | s1r1365 | G0:0016740 | 0.0428 |
| s110382 | G0:0034654 | <1e-4 | ssr1499 | G0:0009199 | <1e-4 | s1r6033 | G0:0015293 | <1e-4 | ssr6085 | G0:0043226 | <1e-4 | s1r6074 | G0:0016740 | 0.0428 |
| s1r1186 | G0:0009124 | <1e-4 | s117031 | G0:0019751 | <1e-4 | s111218 | G0:0022832 | <1e-4 | s1r1613 | G0:0044425 | <1e-4 | s1r5018 | G0:0016740 | 0.0428 |
| s1r1079 | G0:0019362 | <1e-4 | s1r1812 | G0:0055114 | <1e-4 | s1r1668 | G0:0022832 | <1e-4 | s1r0941 | G0:0043226 | <1e-4 | s1r1261 | G0:0016740 | 0.0428 |
| s111512 | G0:0019752 | <1e-4 | s111052 | G0:0042451 | <1e-4 | s110539 | G0:0022890 | <1e-4 | s1r1573 | G0:0044425 | <1e-4 | s1r0907 | G0:0016740 | 0.0428 |
| s1r6063 | G0:0006732 | <1e-4 | s111763 | G0:0008610 | <1e-4 | s1r5053 | G0:0043167 | <1e-4 | s111995 | G0:0044444 | <1e-4 | s1r0960 | G0:0016740 | 0.0428 |
| s111201 | G0:0051234 | <1e-4 | ssr3129 | G0:0048518 | <1e-4 | s1r1128 | G0:0043167 | <1e-4 | s1r0272 | G0:0044444 | <1e-4 | ss12781 | G0:0016740 | 0.0428 |
| s1r0285 | G0:0009126 | <1e-4 | s110780 | G0:0009199 | <1e-4 | s1r6006 | G0:0015077 | <1e-4 | s112013 | G0:0043226 | <1e-4 | s1r1263 | G0:0016740 | 0.0428 |
| s1r1122 | G0:0090304 | <1e-4 | s111433 | G0:0009056 | <1e-4 | ss10750 | G0:0022890 | <1e-4 | s111939 | G0:0005575 | <1e-4 | s111961 | G0:0016740 | 0.0428 |
| s110497 | G0:0048519 | <1e-4 | s1r1964 | G0:0042180 | <1e-4 | s111769 | G0:0015075 | <1e-4 | s1r0770 | G0:0005575 | <1e-4 | s1r1566 | G0:0016740 | 0.0428 |
| s1r7097 | G0:0009260 | <1e-4 | s111714 | G0:0006811 | <1e-4 | s111106 | G0:0043167 | <1e-4 | s1r0064 | G0:0044464 | <1e-4 | s110176 | G0:0016740 | 0.0428 |
| s1r0404 | G0:0072522 | <1e-4 | sml0011 | G0:0034660 | <1e-4 | s117077 | G0:0015075 | <1e-4 | ssr3467 | G0:0044464 | <1e-4 | s1r7023 | G0:0016740 | 0.0428 |
| s1r1415 | G0:0008610 | <1e-4 | s1r2117 | G0:0048518 | <1e-4 | ss10483 | G0:0022838 | <1e-4 | ss15065 | G0:0043226 | <1e-4 | s1r0142 | G0:0016740 | 0.0428 |
| s1r8022 | G0:0052111 | <1e-4 | s111601 | G0:0051234 | <1e-4 | s110281 | G0:0005342 | <1e-4 | s111293 | G0:0005575 | <1e-4 | s1r7011 | G0:0016740 | 0.0428 |
| s110354 | G0:0019362 | <1e-4 | s1r1194 | G0:0006811 | <1e-4 | s111863 | G0:0043167 | <1e-4 | s111651 | G0:0005575 | <1e-4 | s111696 | G0:0016740 | 0.0428 |
| s110524 | G0:0048878 | <1e-4 | s1r6038 | G0:0009308 | <1e-4 | s1r1900 | G0:0043167 | <1e-4 | s111969 | G0:0044446 | <1e-4 | s111378 | G0:0016740 | 0.0428 |
| s1r1406 | G0:0009262 | <1e-4 | s1r1449 | G0:0051716 | <1e-4 | s1r0112 | G0:0043492 | <1e-4 | s111273 | G0:0044425 | <1e-4 | ss15098 | G0:0016740 | 0.0428 |
| s1r0082 | G0:0044283 | <1e-4 | s1r0360 | G0:0001932 | <1e-4 | ssr6099 | G0:0015293 | <1e-4 | s1r6072 | G0:0005575 | <1e-4 | s111348 | G0:0016740 | 0.0428 |
| s110982 | G0:0016052 | <1e-4 | ssr6085 | G0:0006720 | <1e-4 | s111797 | G0:0022803 | <1e-4 | s117067 | G0:0044424 | <1e-4 | s1r6021 | G0:0016740 | 0.0428 |
| s110296 | G0:0006793 | <1e-4 | s1r1084 | G0:0009144 | <1e-4 | s110596 | G0:0005342 | <1e-4 | ss17051 | G0:0044422 | <1e-4 | s110518 | G0:0016740 | 0.0428 |
| s1r1704 | G0:0009150 | <1e-4 | s110410 | G0:0019637 | <1e-4 | s1r0869 | G0:0003674 | <1e-4 | s118007 | G0:0044444 | <1e-4 | s1r1998 | G0:0016740 | 0.0428 |
| s1r1681 | G0:0009141 | <1e-4 | s110319 | G0:0031323 | <1e-4 | s111609 | G0:0003674 | <1e-4 | s111541 | G0:0005575 | <1e-4 | s110742 | G0:0016740 | 0.0428 |
| s110062 | G0:0071842 | <1e-4 | s111192 | G0:0048519 | <1e-4 | s1r1932 | G0:0016817 | <1e-4 | s111654 | G0:0005575 | <1e-4 | s111389 | G0:0016740 | 0.0428 |
| s111233 | G0:0033013 | <1e-4 | ssr1499 | G0:0043933 | <1e-4 | s110740 | G0:0022803 | <1e-4 | s111192 | G0:0044464 | <1e-4 | s111160 | G0:0016740 | 0.0428 |
| s110558 | G0:0009150 | <1e-4 | ssr2781 | G0:0044260 | <1e-4 | s117050 | G0:0016818 | <1e-4 | s1r1365 | G0:0044444 | <1e-4 | s115034 | G0:0016740 | 0.0428 |
| s110737 | G0:0009117 | <1e-4 | s1r1568 | G0:0022607 | <1e-4 | s1r0082 | G0:0043167 | <1e-4 | s1r1611 | G0:0044464 | <1e-4 | s1r8014 | G0:0016740 | 0.0428 |
| s1r0651 | G0:0006066 | <1e-4 | ss15091 | G0:0043170 | <1e-4 | s1r1660 | G0:0022892 | <1e-4 | s1r1127 | G0:0043226 | <1e-4 | s1r1384 | G0:0016740 | 0.0428 |
| ssr2848 | G0:0009124 | <1e-4 | s1r0553 | G0:0009141 | <1e-4 | s1r1917 | G0:0016462 | <1e-4 | s110780 | G0:0044444 | <1e-4 | s111162 | G0:0016740 | 0.0428 |
| s111735 | G0:0051179 | <1e-4 | s117050 | G0:0006576 | <1e-4 | s110944 | G0:0016817 | <1e-4 | s1r7016 | G0:0044424 | <1e-4 | s115097 | G0:0016740 | 0.0428 |
| s1r0380 | G0:0052111 | <1e-4 | s1r0364 | G0:0046164 | <1e-4 | s1r0810 | G0:0015291 | <1e-4 | s1r5119 | G0:0044422 | <1e-4 | s1r6008 | G0:0016740 | 0.0428 |
| ssr3402 | G0:0031326 | <1e-4 | ssr3122 | G0:0009309 | <1e-4 | s110595 | G0:0022857 | <1e-4 | s1r1419 | G0:0043226 | <1e-4 | ssr2912 | G0:0016740 | 0.0428 |
| s1r1644 | G0:0009056 | <1e-4 | s111344 | G0:0009199 | <1e-4 | s111652 | G0:0022832 | <1e-4 | ssr2317 | G0:0044424 | <1e-4 | s1r5116 | G0:0016740 | 0.0428 |
| s110175 | G0:0019637 | <1e-4 | s1r0914 | G0:0009892 | <1e-4 | s1r2038 | G0:0042623 | <1e-4 | s1r0356 | G0:0044425 | <1e-4 | s115044 | G0:0016740 | 0.0428 |
| s110910 | G0:0006753 | <1e-4 | s1r1218 | G0:0043648 | <1e-4 | ssr8047 | G0:0043167 | <1e-4 | s1r7060 | G0:0044464 | <1e-4 | s110659 | G0:0016740 | 0.0428 |
| s1r1394 | G0:0022607 | <1e-4 | s111025 | G0:0009056 | <1e-4 | ssr5120 | G0:0022890 | <1e-4 | s110984 | G0:0044424 | <1e-4 | s1r6065 | G0:0016740 | 0.0428 |
| ssr3572 | G0:0044248 | <1e-4 | s110243 | G0:0090304 | <1e-4 | s1r0060 | G0:0060089 | <1e-4 | ssr2848 | G0:0005575 | <1e-4 | s1r0964 | G0:0016740 | 0.0428 |
| s110319 | G0:0006721 | <1e-4 | s110481 | G0:0050801 | <1e-4 | ssr6020 | G0:0022832 | <1e-4 | s1r2048 | G0:0005575 | <1e-4 | s1r1484 | G0:0016740 | 0.0428 |
| s117089 | G0:0051234 | <1e-4 | s110268 | G0:0044281 | <1e-4 | s110994 | G0:0043492 | <1e-4 | s1r5111 | G0:0005575 | <1e-4 | s118007 | G0:0016740 | 0.0428 |
| s110160 | G0:0009124 | <1e-4 | s1r0552 | G0:0009263 | <1e-4 | s1r0112 | G0:0022836 | <1e-4 | s1r0092 | G0:0005575 | <1e-4 | s1r6073 | G0:0016740 | 0.0428 |
| s1r1572 | G0:0051246 | <1e-4 | s110678 | G0:0071842 | <1e-4 | s1r5077 | G0:0015267 | <1e-4 | s111319 | G0:0005575 | <1e-4 | ssr6048 | G0:0016740 | 0.0428 |
| s1r1537 | G0:0009126 | <1e-4 | s1r1266 | G0:0043648 | <1e-4 | ssr0692 | G0:0022857 | <1e-4 | ss12733 | G0:0044444 | <1e-4 | s1r0148 | G0:0016740 | 0.0428 |
| s1r0596 | G0:0045184 | <1e-4 | s1r0645 | G0:0016052 | <1e-4 | ss13142 | G0:0015405 | <1e-4 | s111915 | G0:0044424 | <1e-4 | s1r7082 | G0:0016740 | 0.0428 |
| s111509 | G0:0043412 | <1e-4 | s111726 | G0:0006721 | <1e-4 | s1r1437 | G0:0015267 | <1e-4 | s110763 | G0:0044424 | <1e-4 | s1r0049 | G0:0016740 | 0.0428 |
| s110503 | G0:0048878 | <1e-4 | s1r1813 | G0:0051186 | <1e-4 | s111961 | G0:0016818 | <1e-4 | s110325 | G0:0044444 | <1e-4 | s1r1103 | G0:0016740 | 0.0428 |
| s1r0981 | G0:0006811 | <1e-4 | s117089 | G0:0043436 | <1e-4 | ssr0759 | G0:0022890 | <1e-4 | ssr1698 | G0:0044444 | <1e-4 | ss13383 | G0:0016740 | 0.0428 |
| s1r1926 | G0:0050789 | <1e-4 | s110230 | G0:0006811 | <1e-4 | s1r0157 | G0:0016462 | <1e-4 | s111825 | G0:0005575 | <1e-4 | s111638 | G0:0016740 | 0.0428 |

|         |            |       |         |            |       |          |            |       |         |            |       |         |            |        |
|---------|------------|-------|---------|------------|-------|----------|------------|-------|---------|------------|-------|---------|------------|--------|
| ssl3383 | G0:0009889 | <1e-4 | sl15003 | G0:0044003 | <1e-4 | slr2121  | G0:0015077 | <1e-4 | sl10532 | G0:0044425 | <1e-4 | sl10727 | G0:0016740 | 0.0428 |
| slr0651 | G0:0031326 | <1e-4 | sl11414 | G0:0044260 | <1e-4 | ssr6002  | G0:0016818 | <1e-4 | sl10319 | G0:0005575 | <1e-4 | sl17063 | G0:0016740 | 0.0428 |
| slr1103 | G0:0055086 | <1e-4 | sl10645 | G0:0051246 | <1e-4 | ssr6085  | G0:0043167 | <1e-4 | sl10060 | G0:0005575 | <1e-4 | slr6072 | G0:0016740 | 0.0428 |
| slr0967 | G0:0043933 | <1e-4 | sl11052 | G0:0034641 | <1e-4 | ssl7039  | G0:0022832 | <1e-4 | sl11916 | G0:0005575 | <1e-4 | slr0489 | G0:0016740 | 0.0428 |
| slr1927 | G0:0006721 | <1e-4 | ssr1425 | G0:0043412 | <1e-4 | slr0980  | G0:0016818 | <1e-4 | sl10608 | G0:0044425 | <1e-4 | slr0145 | G0:0016740 | 0.0428 |
| slr1441 | G0:0051716 | <1e-4 | slr0065 | G0:0044248 | <1e-4 | sl10563  | G0:0015267 | <1e-4 | sl10443 | G0:0044446 | <1e-4 | slr1363 | G0:0016740 | 0.0428 |
| slr0053 | G0:0010468 | <1e-4 | ssr6003 | G0:0051246 | <1e-4 | sl11656  | G0:0016817 | <1e-4 | slr0313 | G0:0044444 | <1e-4 | slr0058 | G0:0016740 | 0.0428 |
| slr0496 | G0:0055086 | <1e-4 | sl11062 | G0:0006766 | <1e-4 | ssr7079  | G0:0015075 | <1e-4 | slr0376 | G0:0043226 | <1e-4 | sl10265 | G0:0016740 | 0.0428 |
| ssl8003 | G0:0009262 | <1e-4 | slr1470 | G0:0009263 | <1e-4 | ssl0750  | G0:0015291 | <1e-4 | slr2105 | G0:0044444 | <1e-4 | slr1927 | G0:0016740 | 0.0428 |
| sl11476 | G0:0042180 | <1e-4 | slr8022 | G0:0034660 | <1e-4 | sl11025  | G0:0022832 | <1e-4 | slr0801 | G0:0044425 | <1e-4 | slr7083 | G0:0016740 | 0.0428 |
| sl11692 | G0:0080090 | <1e-4 | sl10905 | G0:0019222 | <1e-4 | ssl5091  | G0:0005342 | <1e-4 | sl11426 | G0:0005575 | <1e-4 | slr1260 | G0:0016740 | 0.0428 |
| slr0458 | G0:0050794 | <1e-4 | slr1187 | G0:0043648 | <1e-4 | sl10177  | G0:0042623 | <1e-4 | ssr1258 | G0:0044446 | <1e-4 | sl11921 | G0:0016740 | 0.0428 |
| sl17055 | G0:0044255 | <1e-4 | sl11004 | G0:0042451 | <1e-4 | sl11068  | G0:0005342 | <1e-4 | sl11061 | G0:0005575 | <1e-4 | slr0356 | G0:0016740 | 0.0428 |
| ssl3829 | G0:0072527 | <1e-4 | ssl5129 | G0:0055082 | <1e-4 | sl10168  | G0:0003674 | <1e-4 | ssr7079 | G0:0044422 | <1e-4 | sl10397 | G0:0016740 | 0.0428 |
| sl10641 | G0:0006730 | <1e-4 | slr7037 | G0:0046907 | <1e-4 | slr1396  | G0:0016817 | <1e-4 | sl10740 | G0:0044424 | <1e-4 | slr0337 | G0:0005975 | 0.0418 |
| slr1306 | G0:0046907 | <1e-4 | sl10360 | G0:0006066 | <1e-4 | slr0076  | G0:0060089 | <1e-4 | sl10406 | G0:0044424 | <1e-4 | slr0505 | G0:0005975 | 0.0418 |
| slr0423 | G0:0048519 | <1e-4 | sl17077 | G0:0010468 | <1e-4 | sl10280  | G0:0022891 | <1e-4 | slr1546 | G0:0044444 | <1e-4 | slr0907 | G0:0005975 | 0.0418 |
| sl17086 | G0:0051716 | <1e-4 | sl15034 | G0:0006811 | <1e-4 | slr0989  | G0:0043492 | <1e-4 | slr1210 | G0:0044444 | <1e-4 | ssl2781 | G0:0005975 | 0.0418 |
| sl11062 | G0:0034654 | <1e-4 | slr0479 | G0:0008150 | <1e-4 | ssr2998  | G0:0022890 | <1e-4 | ssr6024 | G0:0043226 | <1e-4 | sl11022 | G0:0005975 | 0.0418 |
| slr7013 | G0:0050789 | <1e-4 | slr7091 | G0:0051171 | <1e-4 | sl17047  | G0:0022857 | <1e-4 | slr6051 | G0:0044464 | <1e-4 | sl10174 | G0:0005975 | 0.0418 |
| slr7015 | G0:0008150 | <1e-4 | slr1262 | G0:0006733 | <1e-4 | sl10272  | G0:0022803 | <1e-4 | slr8022 | G0:0005575 | <1e-4 | slr0362 | G0:0005975 | 0.0418 |
| slr1623 | G0:0051186 | <1e-4 | slr1530 | G0:0071554 | <1e-4 | slr0742  | G0:0016818 | <1e-4 | slr6044 | G0:0044446 | <1e-4 | ssr6026 | G0:0005975 | 0.0418 |
| sl11934 | G0:0009144 | <1e-4 | slr0607 | G0:0044248 | <1e-4 | slr1413  | G0:0008171 | <1e-4 | sl10162 | G0:0044446 | <1e-4 | sl17047 | G0:0005975 | 0.0418 |
| sl11052 | G0:0008150 | <1e-4 | slr0789 | G0:0051188 | <1e-4 | ssl1792  | G0:0042623 | <1e-4 | sl11173 | G0:0044425 | <1e-4 | sl10406 | G0:0005975 | 0.0418 |
| sl11915 | G0:0009056 | <1e-4 | slr1240 | G0:0043170 | <1e-4 | ssl5108  | G0:0022832 | <1e-4 | sl17043 | G0:0044444 | <1e-4 | slr1260 | G0:0005975 | 0.0418 |
| sl11252 | G0:0051171 | <1e-4 | sl17066 | G0:0042451 | <1e-4 | sl11632  | G0:0015267 | <1e-4 | ssr2848 | G0:0044425 | <1e-4 | slr0569 | G0:0005975 | 0.0418 |
| sl10611 | G0:0050801 | <1e-4 | sl10225 | G0:0044248 | <1e-4 | sl10585  | G0:0015405 | <1e-4 | slr2125 | G0:0044464 | <1e-4 | sl10760 | G0:0005975 | 0.0418 |
| slr1619 | G0:0065007 | <1e-4 | slr7102 | G0:0009165 | <1e-4 | slr0106  | G0:0008171 | <1e-4 | sl11068 | G0:0005575 | <1e-4 | slr1429 | G0:0005975 | 0.0418 |
| sl10400 | G0:0045184 | <1e-4 | sl10497 | G0:0009889 | <1e-4 | sl11400  | G0:0043167 | <1e-4 | ssr3570 | G0:0044422 | <1e-4 | sl11884 | G0:0005975 | 0.0418 |
| slr1546 | G0:0055114 | <1e-4 | slr1143 | G0:0065007 | <1e-4 | sl11061  | G0:0022838 | <1e-4 | ssl3829 | G0:0044444 | <1e-4 | ssl0312 | G0:0005975 | 0.0418 |
| sl11162 | G0:0043648 | <1e-4 | sl15032 | G0:0051186 | <1e-4 | slr0108  | G0:0022857 | <1e-4 | sl11696 | G0:0044422 | <1e-4 | sl18032 | G0:0005975 | 0.0418 |
| sl17033 | G0:0009126 | <1e-4 | slr1576 | G0:0006811 | <1e-4 | sl10909  | G0:0022891 | <1e-4 | sl10939 | G0:0044444 | <1e-4 | slr1187 | G0:0005975 | 0.0418 |
| slr1107 | G0:0006091 | <1e-4 | sl10981 | G0:0044282 | <1e-4 | sl10047  | G0:0042623 | <1e-4 | slr1977 | G0:0044422 | <1e-4 | sl11414 | G0:0005975 | 0.0418 |
| slr0168 | G0:0019362 | <1e-4 | sl10743 | G0:0048522 | <1e-4 | slr1188  | G0:0016817 | <1e-4 | slr0810 | G0:0044446 | <1e-4 | slr0065 | G0:0005975 | 0.0418 |
| ssr5011 | G0:0051347 | <1e-4 | slr6065 | G0:0043648 | <1e-4 | sl10216  | G0:0042623 | <1e-4 | sl10371 | G0:0043226 | <1e-4 | sl11921 | G0:0005975 | 0.0418 |
| ssr1558 | G0:0008150 | <1e-4 | sl11036 | G0:0009124 | <1e-4 | sl17031  | G0:0022803 | <1e-4 | ssr7072 | G0:0044444 | <1e-4 | slr2105 | G0:0005975 | 0.0418 |
| slr1150 | G0:0060255 | <1e-4 | sl10822 | G0:0048878 | <1e-4 | ssr0102  | G0:0022891 | <1e-4 | slr0241 | G0:0044424 | <1e-4 | sl15047 | G0:0005975 | 0.0418 |
| sl10931 | G0:0052188 | <1e-4 | slr7025 | G0:0071554 | <1e-4 | sl11411  | G0:0016741 | <1e-4 | ssl0353 | G0:0044446 | <1e-4 | sl11123 | G0:0005975 | 0.0418 |
| ssr1391 | G0:0009165 | <1e-4 | slr1958 | G0:0044255 | <1e-4 | slr5024  | G0:0015293 | <1e-4 | slr0848 | G0:0005575 | <1e-4 | slr5119 | G0:0005975 | 0.0418 |
| slr0709 | G0:0048518 | <1e-4 | slr2118 | G0:0044271 | <1e-4 | ssl3382  | G0:0022832 | <1e-4 | slr0980 | G0:0005575 | <1e-4 | sl11509 | G0:0005975 | 0.0418 |
| slr1396 | G0:0051716 | <1e-4 | ssl1690 | G0:0042180 | <1e-4 | sl10444  | G0:0008171 | <1e-4 | ssl1263 | G0:0044424 | <1e-4 | sl11109 | G0:0005975 | 0.0418 |
| slr1306 | G0:0051188 | <1e-4 | ssr2554 | G0:0046128 | <1e-4 | slr8022  | G0:0022832 | <1e-4 | sg10002 | G0:0005575 | <1e-4 | slr0592 | G0:0005975 | 0.0418 |
| sl11761 | G0:0050801 | <1e-4 | slr0179 | G0:0051818 | <1e-4 | slr1659  | G0:0022891 | <1e-4 | slr1398 | G0:0044464 | <1e-4 | sl10786 | G0:0005975 | 0.0418 |
| slr7059 | G0:0050789 | <1e-4 | slr2111 | G0:0046483 | <1e-4 | sl11151  | G0:0060089 | <1e-4 | sl10732 | G0:0044444 | <1e-4 | slr0655 | G0:0005975 | 0.0418 |
| slr1495 | G0:0009117 | <1e-4 | ssr2333 | G0:0043436 | <1e-4 | ssl0294  | G0:0016818 | <1e-4 | slr0453 | G0:0044464 | <1e-4 | slr5023 | G0:0005975 | 0.0418 |
| slr0605 | G0:0051716 | <1e-4 | ssl2733 | G0:0044281 | <1e-4 | sl10361  | G0:0022892 | <1e-4 | slr0082 | G0:0044464 | <1e-4 | slr1186 | G0:0005975 | 0.0418 |
| slr0590 | G0:0071841 | <1e-4 | slr1827 | G0:0019222 | <1e-4 | slr1658  | G0:0016818 | <1e-4 | sl18012 | G0:0043226 | <1e-4 | slr0196 | G0:0005975 | 0.0418 |
| slr0960 | G0:0051818 | <1e-4 | slr0845 | G0:0031323 | <1e-4 | sl10843  | G0:0015399 | <1e-4 | slr1957 | G0:0044422 | <1e-4 | slr2101 | G0:0005975 | 0.0418 |
| slr5119 | G0:0055082 | <1e-4 | slr0060 | G0:0009892 | <1e-4 | sl11002  | G0:0016746 | <1e-4 | sl10325 | G0:0044446 | <1e-4 | slr0059 | G0:0005975 | 0.0418 |
| sl10102 | G0:0072528 | <1e-4 | ssr7084 | G0:0009889 | <1e-4 | slr0404  | G0:0022891 | <1e-4 | slr0105 | G0:0044425 | <1e-4 | sl15026 | G0:0005975 | 0.0418 |
| ssr0536 | G0:0019362 | <1e-4 | sl10413 | G0:0016052 | <1e-4 | sl111785 | G0:0043167 | <1e-4 | slr0299 | G0:0005575 | <1e-4 | sl10218 | G0:0005975 | 0.0418 |
| slr0356 | G0:0009987 | <1e-4 | slr1240 | G0:0080090 | <1e-4 | sl17066  | G0:0016462 | <1e-4 | ssr1499 | G0:0005575 | <1e-4 | sl10751 | G0:0005975 | 0.0418 |
| ssr1499 | G0:0009142 | <1e-4 | sl10181 | G0:0045184 | <1e-4 | ssr8047  | G0:0015405 | <1e-4 | slr0890 | G0:0044424 | <1e-4 | slr0168 | G0:0005975 | 0.0418 |
| slr0989 | G0:0051234 | <1e-4 | slr1923 | G0:0009308 | <1e-4 | sl10225  | G0:0016741 | <1e-4 | sl10756 | G0:0044424 | <1e-4 | ssr0102 | G0:0005975 | 0.0418 |

|         |            |       |         |            |       |         |            |       |         |            |       |         |            |        |
|---------|------------|-------|---------|------------|-------|---------|------------|-------|---------|------------|-------|---------|------------|--------|
| slr1103 | G0:0043549 | <1e-4 | slr0975 | G0:0042180 | <1e-4 | sl11477 | G0:0042623 | <1e-4 | slr1920 | G0:0043226 | <1e-4 | sl18033 | G0:0005975 | 0.0418 |
| slr1668 | G0:0001932 | <1e-4 | slr0341 | G0:0060255 | <1e-4 | sl10265 | G0:0016741 | <1e-4 | sl11749 | G0:0044464 | <1e-4 | slr0058 | G0:0005975 | 0.0418 |
| slr0455 | G0:0044283 | <1e-4 | slr1790 | G0:0009165 | <1e-4 | slr1918 | G0:0015075 | <1e-4 | slr0337 | G0:0043226 | <1e-4 | slr0552 | G0:0005975 | 0.0418 |
| slr6022 | G0:0006576 | <1e-4 | ssr1768 | G0:0009987 | <1e-4 | slr2111 | G0:0022857 | <1e-4 | slr0848 | G0:0044424 | <1e-4 | slr1462 | G0:0005975 | 0.0418 |
| slr1406 | G0:0044260 | <1e-4 | slr0569 | G0:0009057 | <1e-4 | sl10785 | G0:0022832 | <1e-4 | slr1266 | G0:0044464 | <1e-4 | slr6047 | G0:0005975 | 0.0418 |
| sl10444 | G0:0044275 | <1e-4 | ssr7017 | G0:0006793 | <1e-4 | sl10508 | G0:0022838 | <1e-4 | sl11447 | G0:0005575 | <1e-4 | sl10994 | G0:0005975 | 0.0418 |
| sl11130 | G0:0043648 | <1e-4 | slr6066 | G0:0009991 | <1e-4 | sl10298 | G0:0022836 | <1e-4 | sl11062 | G0:0044424 | <1e-4 | slr6015 | G0:0005975 | 0.0418 |
| slr0921 | G0:0009150 | <1e-4 | sl15130 | G0:0051234 | <1e-4 | sl10335 | G0:0022891 | <1e-4 | sl10175 | G0:0005575 | <1e-4 | ss11464 | G0:0005975 | 0.0418 |
| sl10565 | G0:0006766 | <1e-4 | sl11752 | G0:0051179 | <1e-4 | slr1442 | G0:0015075 | <1e-4 | slr0148 | G0:0005575 | <1e-4 | slr1907 | G0:0005975 | 0.0418 |
| sl10350 | G0:0051179 | <1e-4 | slr0082 | G0:0009262 | <1e-4 | ss10788 | G0:0022803 | <1e-4 | ssr0102 | G0:0044464 | <1e-4 | slr6090 | G0:0005975 | 0.0418 |
| slr1704 | G0:0071554 | <1e-4 | sl10225 | G0:0009987 | <1e-4 | slr2144 | G0:0015077 | <1e-4 | sl10572 | G0:0044464 | <1e-4 | sl10266 | G0:0005975 | 0.0418 |
| ssr2848 | G0:0033013 | <1e-4 | sl10266 | G0:0043412 | <1e-4 | slr0863 | G0:0016817 | <1e-4 | slr1600 | G0:0043226 | <1e-4 | slr1068 | G0:0005975 | 0.0418 |
| sl15097 | G0:0043170 | <1e-4 | slr0594 | G0:0019219 | <1e-4 | sl17063 | G0:0003674 | <1e-4 | sl10096 | G0:0044444 | <1e-4 | sl10008 | G0:0005975 | 0.0418 |
| slr1816 | G0:0050794 | <1e-4 | sl11304 | G0:0009987 | <1e-4 | sl10265 | G0:0022838 | <1e-4 | slr1611 | G0:0005575 | <1e-4 | slr6039 | G0:0005975 | 0.0418 |
| ssr2781 | G0:0009144 | <1e-4 | slr0317 | G0:0006631 | <1e-4 | sl10743 | G0:0022892 | <1e-4 | sl11192 | G0:0005575 | <1e-4 | slr6063 | G0:0005975 | 0.0418 |
| slr1391 | G0:0055086 | <1e-4 | ss16061 | G0:0048522 | <1e-4 | sl10156 | G0:0016462 | <1e-4 | slr6104 | G0:0043226 | <1e-4 | slr1677 | G0:0005975 | 0.0418 |
| slr1920 | G0:0072522 | <1e-4 | slr0294 | G0:0048523 | <1e-4 | sl10446 | G0:0022803 | <1e-4 | sl11380 | G0:0044464 | <1e-4 | slr1814 | G0:0005975 | 0.0418 |
| slr1926 | G0:0006082 | <1e-4 | slr1811 | G0:0018130 | <1e-4 | slr2049 | G0:0015267 | <1e-4 | slr0654 | G0:0043226 | <1e-4 | slr1195 | G0:0005975 | 0.0418 |
| slr1266 | G0:0008610 | <1e-4 | ss15031 | G0:0006793 | <1e-4 | slr0810 | G0:0015267 | <1e-4 | ssr6083 | G0:0005575 | <1e-4 | slr0195 | G0:0005975 | 0.0418 |
| sl10181 | G0:0044255 | <1e-4 | sl10641 | G0:0055082 | <1e-4 | ss10738 | G0:0015293 | <1e-4 | slr1342 | G0:0044444 | <1e-4 | slr1273 | G0:0005975 | 0.0418 |
| ssr6078 | G0:0048522 | <1e-4 | slr5016 | G0:0050801 | <1e-4 | slr1032 | G0:0016741 | <1e-4 | slr6094 | G0:0044444 | <1e-4 | slr1095 | G0:0005975 | 0.0418 |
| sl10756 | G0:0009144 | <1e-4 | sl10310 | G0:0009144 | <1e-4 | ssr3129 | G0:0016817 | <1e-4 | ss11792 | G0:0043226 | <1e-4 | slr1397 | G0:0005975 | 0.0418 |
| sl10939 | G0:0051234 | <1e-4 | slr0769 | G0:0006082 | <1e-4 | ssr3129 | G0:0022890 | <1e-4 | ss17039 | G0:0044422 | <1e-4 | slr1276 | G0:0005975 | 0.0418 |
| slr6045 | G0:0009057 | <1e-4 | sl11040 | G0:0052188 | <1e-4 | ssr2317 | G0:0015293 | <1e-4 | slr1886 | G0:0044464 | <1e-4 | ssr0332 | G0:0005975 | 0.0418 |
| sl15028 | G0:0044283 | <1e-4 | sl10085 | G0:0051188 | <1e-4 | slr2119 | G0:0015405 | <1e-4 | sl10609 | G0:0044444 | <1e-4 | slr1484 | G0:0005975 | 0.0418 |
| ss15129 | G0:0055114 | <1e-4 | ssr6024 | G0:0044260 | <1e-4 | sl10198 | G0:0015291 | <1e-4 | sl11926 | G0:0043226 | <1e-4 | sl11092 | G0:0005975 | 0.0418 |
| sl10445 | G0:0044282 | <1e-4 | slr1647 | G0:0034654 | <1e-4 | slr1644 | G0:0022838 | <1e-4 | slr5016 | G0:0044444 | <1e-4 | slr6065 | G0:0005975 | 0.0418 |
| sl11399 | G0:0008610 | <1e-4 | sl10735 | G0:0010468 | <1e-4 | slr1275 | G0:0015399 | <1e-4 | slr1505 | G0:0044422 | <1e-4 | ssr5120 | G0:0005975 | 0.0418 |
| sl17055 | G0:0090304 | <1e-4 | sl17028 | G0:0072521 | <1e-4 | ssr6003 | G0:0016746 | <1e-4 | sl11307 | G0:0044444 | <1e-4 | slr2032 | G0:0005975 | 0.0418 |
| sl11942 | G0:0009889 | <1e-4 | ss15015 | G0:0071554 | <1e-4 | ss11552 | G0:0016818 | <1e-4 | slr0723 | G0:0044424 | <1e-4 | ss13379 | G0:0005975 | 0.0418 |
| sl18002 | G0:0009259 | <1e-4 | sl17089 | G0:0044275 | <1e-4 | sl11542 | G0:0022892 | <1e-4 | ss13291 | G0:0044444 | <1e-4 | sl11764 | G0:0005975 | 0.0418 |
| sl10760 | G0:0006811 | <1e-4 | slr0650 | G0:0034654 | <1e-4 | slr0642 | G0:0022838 | <1e-4 | slr7037 | G0:0044464 | <1e-4 | slr0751 | G0:0005975 | 0.0418 |
| sl10985 | G0:0019752 | <1e-4 | slr1918 | G0:0019752 | <1e-4 | sl10183 | G0:0015405 | <1e-4 | sl11135 | G0:0044422 | <1e-4 | ssr3409 | G0:0005975 | 0.0418 |
| sl11505 | G0:0048518 | <1e-4 | slr1601 | G0:0019751 | <1e-4 | sl11853 | G0:0043167 | <1e-4 | slr1288 | G0:0044444 | <1e-4 | slr1957 | G0:0005975 | 0.0418 |
| sl10382 | G0:0043412 | <1e-4 | slr1070 | G0:0009132 | <1e-4 | ssr3122 | G0:0022890 | <1e-4 | slr1880 | G0:0043226 | <1e-4 | ssr3189 | G0:0005975 | 0.0418 |
| sl11359 | G0:0051716 | <1e-4 | sl11658 | G0:0006066 | <1e-4 | sl10793 | G0:0022890 | <1e-4 | slr0852 | G0:0044425 | <1e-4 | slr0145 | G0:0005975 | 0.0418 |
| slr0398 | G0:0006753 | <1e-4 | sl10980 | G0:0005996 | <1e-4 | sl12015 | G0:0043167 | <1e-4 | slr1114 | G0:0044424 | <1e-4 | sl10811 | G0:0005975 | 0.0418 |
| slr0516 | G0:0031640 | <1e-4 | slr1658 | G0:0044271 | <1e-4 | ss12471 | G0:0060089 | <1e-4 | slr1773 | G0:0044464 | <1e-4 | ss15007 | G0:0005975 | 0.0418 |
| sl10996 | G0:0048518 | <1e-4 | slr7096 | G0:0051347 | <1e-4 | sl11464 | G0:0015267 | <1e-4 | slr1073 | G0:0044444 | <1e-4 | slr0870 | G0:0005975 | 0.0418 |
| slr1062 | G0:0048522 | <1e-4 | slr2005 | G0:0018130 | <1e-4 | sl11902 | G0:0022890 | <1e-4 | ss15027 | G0:0005575 | <1e-4 | slr1270 | G0:0005975 | 0.0418 |
| sl11509 | G0:0019752 | <1e-4 | sl11239 | G0:0052111 | <1e-4 | slr0606 | G0:0022838 | <1e-4 | slr1959 | G0:0005575 | <1e-4 | sl10481 | G0:0005975 | 0.0418 |
| slr0207 | G0:0009263 | <1e-4 | slr1863 | G0:0019752 | <1e-4 | slr1572 | G0:0015291 | <1e-4 | slr0145 | G0:0044444 | <1e-4 | ss11520 | G0:0005975 | 0.0418 |
| slr0149 | G0:0044271 | <1e-4 | sl11995 | G0:0008610 | <1e-4 | slr0813 | G0:0042623 | <1e-4 | sl11825 | G0:0044464 | <1e-4 | slr0959 | G0:0005975 | 0.0418 |
| slr6038 | G0:0051818 | <1e-4 | slr2027 | G0:0019752 | <1e-4 | ss11520 | G0:0015075 | <1e-4 | slr5017 | G0:0044424 | <1e-4 | sl10846 | G0:0005975 | 0.0418 |
| sl11250 | G0:0051716 | <1e-4 | ssr5121 | G0:0044281 | <1e-4 | ss17045 | G0:0016817 | <1e-4 | slr0503 | G0:0005575 | <1e-4 | slr1600 | G0:0005975 | 0.0418 |
| sl10068 | G0:0044271 | <1e-4 | sl10413 | G0:0048519 | <1e-4 | ssr3532 | G0:0022803 | <1e-4 | slr1484 | G0:0044424 | <1e-4 | slr1464 | G0:0005975 | 0.0418 |
| ss15027 | G0:0071841 | <1e-4 | sl10518 | G0:0072528 | <1e-4 | sl10981 | G0:0022836 | <1e-4 | sl10751 | G0:0044444 | <1e-4 | slr1923 | G0:0005975 | 0.0418 |
| slr1535 | G0:0006720 | <1e-4 | sl10283 | G0:0009260 | <1e-4 | sl11119 | G0:0015405 | <1e-4 | slr1178 | G0:0005575 | <1e-4 | sl10301 | G0:0005515 | 0.0414 |
| slr1990 | G0:0043170 | <1e-4 | slr5116 | G0:0005996 | <1e-4 | ss11263 | G0:0022891 | <1e-4 | sl11401 | G0:0044424 | <1e-4 | slr1505 | G0:0005515 | 0.0414 |
| slr2048 | G0:0006733 | <1e-4 | sl17087 | G0:0006733 | <1e-4 | sl12015 | G0:0022857 | <1e-4 | sl10310 | G0:0044422 | <1e-4 | sl10864 | G0:0005515 | 0.0414 |
| slr0651 | G0:0019751 | <1e-4 | ss12420 | G0:0055082 | <1e-4 | slr0144 | G0:0015399 | <1e-4 | sl11021 | G0:0044444 | <1e-4 | sl10274 | G0:0005515 | 0.0414 |
| sl10888 | G0:0019752 | <1e-4 | sl10888 | G0:0044271 | <1e-4 | sl10735 | G0:0005342 | <1e-4 | sl10180 | G0:0005575 | <1e-4 | ssr1375 | G0:0005515 | 0.0414 |
| sl11751 | G0:0071841 | <1e-4 | sl10930 | G0:0008150 | <1e-4 | sl10553 | G0:0022836 | <1e-4 | sl11714 | G0:0005575 | <1e-4 | slr0937 | G0:0005515 | 0.0414 |
| sg10002 | G0:0042455 | <1e-4 | slr0270 | G0:0050801 | <1e-4 | slr0510 | G0:0015405 | <1e-4 | sl11769 | G0:0044425 | <1e-4 | sl11942 | G0:0005515 | 0.0414 |

|         |            |       |         |            |       |         |            |       |         |            |       |         |            |        |
|---------|------------|-------|---------|------------|-------|---------|------------|-------|---------|------------|-------|---------|------------|--------|
| slr0863 | G0:0006163 | <1e-4 | slr1315 | G0:0043170 | <1e-4 | s111863 | G0:0022890 | <1e-4 | slr0355 | G0:0044422 | <1e-4 | s111186 | G0:0005515 | 0.0414 |
| slr6028 | G0:0044283 | <1e-4 | slr1384 | G0:0009893 | <1e-4 | s110237 | G0:0022838 | <1e-4 | ss12138 | G0:0044446 | <1e-4 | slr1417 | G0:0005515 | 0.0414 |
| slr1168 | G0:0072522 | <1e-4 | s110783 | G0:0044260 | <1e-4 | slr6039 | G0:0022836 | <1e-4 | ssr5074 | G0:0044444 | <1e-4 | s111219 | G0:0005515 | 0.0414 |
| s111123 | G0:0051716 | <1e-4 | slr1780 | G0:0042180 | <1e-4 | s110007 | G0:0022803 | <1e-4 | s110493 | G0:0005575 | <1e-4 | slr1866 | G0:0005515 | 0.0414 |
| s115089 | G0:0019222 | <1e-4 | s110157 | G0:0006066 | <1e-4 | slr0318 | G0:0016817 | <1e-4 | slr1068 | G0:0005575 | <1e-4 | ssr2843 | G0:0004871 | 0.0414 |
| slr1699 | G0:0009260 | <1e-4 | slr1533 | G0:0072524 | <1e-4 | ssr3571 | G0:0015077 | <1e-4 | slr1964 | G0:0044424 | <1e-4 | s111737 | G0:0004871 | 0.0414 |
| slr1419 | G0:0051716 | <1e-4 | ssr1473 | G0:0006811 | <1e-4 | slr1768 | G0:0016746 | <1e-4 | slr1258 | G0:0005575 | <1e-4 | s110615 | G0:0005515 | 0.0414 |
| slr1186 | G0:0044255 | <1e-4 | slr0374 | G0:0019219 | <1e-4 | s111142 | G0:0022892 | <1e-4 | slr1957 | G0:0005575 | <1e-4 | s110996 | G0:0005515 | 0.0414 |
| slr1240 | G0:0052188 | <1e-4 | ssr1425 | G0:0046164 | <1e-4 | ssr7079 | G0:0003674 | <1e-4 | slr6094 | G0:0043226 | <1e-4 | ss13692 | G0:0005515 | 0.0414 |
| s111658 | G0:0043549 | <1e-4 | s115047 | G0:0034641 | <1e-4 | slr1128 | G0:0022838 | <1e-4 | slr0453 | G0:0044446 | <1e-4 | s110447 | G0:0005515 | 0.0414 |
| s111832 | G0:0060255 | <1e-4 | s111912 | G0:0006766 | <1e-4 | s110359 | G0:0042623 | <1e-4 | slr1045 | G0:0005575 | <1e-4 | slr0209 | G0:0005515 | 0.0414 |
| s110242 | G0:0006163 | <1e-4 | slr6067 | G0:0051347 | <1e-4 | s115047 | G0:0016746 | <1e-4 | s110410 | G0:0044422 | <1e-4 | slr1441 | G0:0005515 | 0.0414 |
| s110623 | G0:0042180 | <1e-4 | slr0770 | G0:0009057 | <1e-4 | s111131 | G0:0015405 | <1e-4 | slr0059 | G0:0044446 | <1e-4 | s110547 | G0:0005515 | 0.0414 |
| slr1081 | G0:0006811 | <1e-4 | ssr2439 | G0:0019222 | <1e-4 | ssr2615 | G0:0042623 | <1e-4 | slr0287 | G0:0044444 | <1e-4 | s111166 | G0:0005515 | 0.0414 |
| s111160 | G0:0048523 | <1e-4 | s111527 | G0:0044281 | <1e-4 | slr0545 | G0:0043167 | <1e-4 | ssr3402 | G0:0043226 | <1e-4 | ssr1698 | G0:0005515 | 0.0414 |
| slr5073 | G0:0042451 | <1e-4 | slr1306 | G0:0006811 | <1e-4 | s111939 | G0:0022857 | <1e-4 | s111563 | G0:0043226 | <1e-4 | slr1045 | G0:0005515 | 0.0414 |
| s111938 | G0:0006091 | <1e-4 | ss17046 | G0:0051716 | <1e-4 | s111583 | G0:0022836 | <1e-4 | s110638 | G0:0044444 | <1e-4 | slr2092 | G0:0004871 | 0.0414 |
| s111060 | G0:0006766 | <1e-4 | slr1612 | G0:0044283 | <1e-4 | slr7057 | G0:0015267 | <1e-4 | s110552 | G0:0043226 | <1e-4 | s110066 | G0:0008168 | 0.0398 |
| slr0023 | G0:0009262 | <1e-4 | slr1073 | G0:0016054 | <1e-4 | slr2011 | G0:0015075 | <1e-4 | slr0658 | G0:0043226 | <1e-4 | s110756 | G0:0008168 | 0.0398 |
| slr1918 | G0:0048518 | <1e-4 | ssr3402 | G0:0071496 | <1e-4 | slr0211 | G0:0003674 | <1e-4 | s110827 | G0:0044446 | <1e-4 | s110676 | G0:0008168 | 0.0398 |
| slr0516 | G0:0006732 | <1e-4 | s118033 | G0:0009123 | <1e-4 | s110394 | G0:0022803 | <1e-4 | s111940 | G0:0043226 | <1e-4 | s111086 | G0:0008168 | 0.0398 |
| s115069 | G0:0009144 | <1e-4 | slr1568 | G0:0051716 | <1e-4 | slr7097 | G0:0015293 | <1e-4 | slr5118 | G0:0044444 | <1e-4 | slr1084 | G0:0008168 | 0.0398 |
| s111355 | G0:0009123 | <1e-4 | slr5126 | G0:0071842 | <1e-4 | slr1472 | G0:0022832 | <1e-4 | ssr2998 | G0:0044425 | <1e-4 | slr1999 | G0:0008168 | 0.0398 |
| slr1911 | G0:0009394 | <1e-4 | s110735 | G0:0006163 | <1e-4 | slr0516 | G0:0016741 | <1e-4 | s117043 | G0:0044425 | <1e-4 | ssr1765 | G0:0008168 | 0.0398 |
| slr1613 | G0:0033013 | <1e-4 | slr0360 | G0:0051179 | <1e-4 | s110552 | G0:0022857 | <1e-4 | slr1116 | G0:0044425 | <1e-4 | s110085 | G0:0008168 | 0.0398 |
| slr0723 | G0:0044260 | <1e-4 | s111884 | G0:0034660 | <1e-4 | slr1468 | G0:0015075 | <1e-4 | ssr7036 | G0:0044425 | <1e-4 | slr1530 | G0:0008168 | 0.0398 |
| s111166 | G0:0006766 | <1e-4 | slr1429 | G0:0048522 | <1e-4 | s111315 | G0:0022891 | <1e-4 | slr1647 | G0:0043226 | <1e-4 | slr0192 | G0:0008168 | 0.0398 |
| slr1534 | G0:0044283 | <1e-4 | s115047 | G0:0044271 | <1e-4 | s111606 | G0:0015077 | <1e-4 | ssr3410 | G0:0044424 | <1e-4 | s111442 | G0:0008168 | 0.0398 |
| s111726 | G0:0009117 | <1e-4 | slr0755 | G0:0009161 | <1e-4 | s111528 | G0:0042623 | <1e-4 | s110172 | G0:0044422 | <1e-4 | slr1073 | G0:0008168 | 0.0398 |
| slr0637 | G0:0044271 | <1e-4 | slr2011 | G0:0009308 | <1e-4 | slr1789 | G0:0016817 | <1e-4 | s110283 | G0:0043226 | <1e-4 | ss10352 | G0:0008168 | 0.0398 |
| slr0667 | G0:0019362 | <1e-4 | slr0579 | G0:0055082 | <1e-4 | s111273 | G0:0022891 | <1e-4 | slr1619 | G0:0005575 | <1e-4 | slr1618 | G0:0008168 | 0.0398 |
| slr7080 | G0:0042451 | <1e-4 | slr1638 | G0:0022607 | <1e-4 | s111142 | G0:0022803 | <1e-4 | slr0184 | G0:0005575 | <1e-4 | slr1788 | G0:0008168 | 0.0398 |
| s111052 | G0:0072524 | <1e-4 | slr0930 | G0:0005996 | <1e-4 | ss15113 | G0:0022892 | <1e-4 | slr5118 | G0:0044424 | <1e-4 | slr1885 | G0:0008168 | 0.0398 |
| slr0341 | G0:0051234 | <1e-4 | s111424 | G0:0043648 | <1e-4 | s111006 | G0:0016741 | <1e-4 | slr6080 | G0:0044464 | <1e-4 | slr1676 | G0:0008168 | 0.0398 |
| s111348 | G0:0009199 | <1e-4 | slr0596 | G0:0071840 | <1e-4 | slr1970 | G0:0015291 | <1e-4 | s111218 | G0:0005575 | <1e-4 | slr1573 | G0:0008168 | 0.0398 |
| s110381 | G0:0051716 | <1e-4 | s110488 | G0:0050794 | <1e-4 | slr2110 | G0:0022836 | <1e-4 | slr0651 | G0:0044444 | <1e-4 | s111632 | G0:0008168 | 0.0398 |
| s117031 | G0:0006091 | <1e-4 | s115030 | G0:0051347 | <1e-4 | s111352 | G0:0015405 | <1e-4 | ssr2060 | G0:0044424 | <1e-4 | s110010 | G0:0008168 | 0.0398 |
| slr1383 | G0:0044282 | <1e-4 | s111233 | G0:0072521 | <1e-4 | s110335 | G0:0003674 | <1e-4 | slr1150 | G0:0044446 | <1e-4 | slr0294 | G0:0008168 | 0.0398 |
| slr0294 | G0:0034654 | <1e-4 | slr1566 | G0:0009150 | <1e-4 | ssr1951 | G0:0015291 | <1e-4 | slr0299 | G0:0044422 | <1e-4 | s110381 | G0:0008168 | 0.0398 |
| slr7025 | G0:0033013 | <1e-4 | slr1074 | G0:0051347 | <1e-4 | slr0552 | G0:0022838 | <1e-4 | s110606 | G0:0044424 | <1e-4 | ss12807 | G0:0008168 | 0.0398 |
| ssr1698 | G0:0051716 | <1e-4 | s110752 | G0:0048519 | <1e-4 | s110424 | G0:0022838 | <1e-4 | s110444 | G0:0044425 | <1e-4 | slr1203 | G0:0008168 | 0.0398 |
| s111321 | G0:0009987 | <1e-4 | s110752 | G0:0050896 | <1e-4 | s115067 | G0:0016746 | <1e-4 | s115044 | G0:0005575 | <1e-4 | slr0941 | G0:0008168 | 0.0398 |
| ssr2962 | G0:0072524 | <1e-4 | s111247 | G0:0071841 | <1e-4 | slr1557 | G0:0016817 | <1e-4 | slr1068 | G0:0044444 | <1e-4 | ssr2962 | G0:0008168 | 0.0398 |
| s110414 | G0:0051347 | <1e-4 | s111040 | G0:0051171 | <1e-4 | ssr2047 | G0:0022892 | <1e-4 | slr1612 | G0:0044424 | <1e-4 | slr0386 | G0:0008168 | 0.0398 |
| s110609 | G0:0050896 | <1e-4 | ss13573 | G0:0006066 | <1e-4 | s110732 | G0:0015293 | <1e-4 | s111651 | G0:0044425 | <1e-4 | s111835 | G0:0008168 | 0.0398 |
| s118032 | G0:0051716 | <1e-4 | slr6064 | G0:0055082 | <1e-4 | slr6029 | G0:0008171 | <1e-4 | slr1278 | G0:0044425 | <1e-4 | s111630 | G0:0008168 | 0.0398 |
| slr1815 | G0:0046483 | <1e-4 | slr1194 | G0:0006732 | <1e-4 | slr0948 | G0:0016741 | <1e-4 | slr1970 | G0:0044424 | <1e-4 | slr0921 | G0:0008168 | 0.0398 |
| s110596 | G0:0043549 | <1e-4 | slr5126 | G0:0044255 | <1e-4 | slr0318 | G0:0022892 | <1e-4 | slr1303 | G0:0044464 | <1e-4 | ss12065 | G0:0008168 | 0.0398 |
| slr0586 | G0:0019752 | <1e-4 | s111880 | G0:0006721 | <1e-4 | slr6022 | G0:0008171 | <1e-4 | s110010 | G0:0005575 | <1e-4 | s111608 | G0:0008168 | 0.0398 |
| slr1177 | G0:0006721 | <1e-4 | ssr5011 | G0:0043170 | <1e-4 | slr0594 | G0:0015291 | <1e-4 | s110846 | G0:0005575 | <1e-4 | s110497 | G0:0008168 | 0.0398 |
| slr1636 | G0:0072528 | <1e-4 | slr1563 | G0:0009123 | <1e-4 | ssr0536 | G0:0003674 | <1e-4 | s111835 | G0:0044446 | <1e-4 | slr1519 | G0:0016740 | 0.0375 |
| slr1383 | G0:0044271 | <1e-4 | slr5021 | G0:0019752 | <1e-4 | slr1273 | G0:0022803 | <1e-4 | s110282 | G0:0043226 | <1e-4 | slr0876 | G0:0016740 | 0.0375 |
| ss11046 | G0:0071842 | <1e-4 | s111830 | G0:0052111 | <1e-4 | slr1186 | G0:0015293 | <1e-4 | slr0151 | G0:0044422 | <1e-4 | s111586 | G0:0016740 | 0.0375 |
| slr1819 | G0:0008150 | <1e-4 | s111611 | G0:0048519 | <1e-4 | slr0581 | G0:0015405 | <1e-4 | s110185 | G0:0044422 | <1e-4 | slr0287 | G0:0016740 | 0.0375 |



sl11373 G0:0009199 <1e-4 sl10735 G0:0019637 <1e-4 ss17042 G0:0022838 <1e-4 sl10611 G0:0044446 <1e-4 sl11222 G0:0003723 0.0375  
ss10461 G0:0009123 <1e-4 slr0238 G0:0051179 <1e-4 slr2103 G0:0060089 <1e-4 slr0730 G0:0005575 <1e-4 sssr1698 G0:0016740 0.0375  
sl10857 G0:0044106 <1e-4 slr0930 G0:0046128 <1e-4 ss11377 G0:0022803 <1e-4 slr2105 G0:0044422 <1e-4 slr0818 G0:0003723 0.0375  
slr0416 G0:0048522 <1e-4 sl10218 G0:0009991 <1e-4 sl10623 G0:0016817 <1e-4 slr2144 G0:0005575 <1e-4 slr1900 G0:0016740 0.0375  
slr1363 G0:0046164 <1e-4 sl10827 G0:0052111 <1e-4 slr0887 G0:0022838 <1e-4 slr1287 G0:0044444 <1e-4 sl11477 G0:0003723 0.0375  
sl10854 G0:0046483 <1e-4 sl11464 G0:0048878 <1e-4 sl10268 G0:0015267 <1e-4 sl11009 G0:0005575 <1e-4 slr1918 G0:0016740 0.0375  
sl11835 G0:0042180 <1e-4 sss12971 G0:0016054 <1e-4 ss12148 G0:0016462 <1e-4 slr6006 G0:0005575 <1e-4 slr0243 G0:0016740 0.0375  
ss12807 G0:0009144 <1e-4 sl11203 G0:0006811 <1e-4 sl11162 G0:0060089 <1e-4 sl10802 G0:0043226 <1e-4 slr0211 G0:0016740 0.0375  
sl10590 G0:0006733 <1e-4 slr0416 G0:0006220 <1e-4 sl11250 G0:0005342 <1e-4 sl10513 G0:0043226 <1e-4 slr1391 G0:0016740 0.0375  
slr1495 G0:0009123 <1e-4 sl11715 G0:0006220 <1e-4 slr2103 G0:0016817 <1e-4 sl10148 G0:0005575 <1e-4 slr0157 G0:0016740 0.0375  
slr0184 G0:0009123 <1e-4 slr8044 G0:0006082 <1e-4 slr7094 G0:0015399 <1e-4 slr1101 G0:0044446 <1e-4 sss10787 G0:0016740 0.0375  
ss10738 G0:0016054 <1e-4 slr6064 G0:0044003 <1e-4 slr1101 G0:0042623 <1e-4 sl11109 G0:0044422 <1e-4 slr0108 G0:0003723 0.0375  
sl11319 G0:0046164 <1e-4 slr1590 G0:0009394 <1e-4 sl15090 G0:0043167 <1e-4 slr1307 G0:0044424 <1e-4 sl11166 G0:0016740 0.0375  
sl11166 G0:0044281 <1e-4 sl11086 G0:0055086 <1e-4 slr5077 G0:0060089 <1e-4 sl11304 G0:0005575 <1e-4 sl11247 G0:0016740 0.0375  
ss16035 G0:0034641 <1e-4 sl10294 G0:0046483 <1e-4 sl10647 G0:0022857 <1e-4 slr1195 G0:0005575 <1e-4 sl10735 G0:0003723 0.0375  
sl11378 G0:0044106 <1e-4 sl10886 G0:0009263 <1e-4 sl10543 G0:0016818 <1e-4 sl10066 G0:0043226 <1e-4 slr1441 G0:0016740 0.0375  
sl11921 G0:0051179 <1e-4 sl11095 G0:0050794 <1e-4 sl10448 G0:0016462 <1e-4 sssr1528 G0:0044424 <1e-4 sl10148 G0:0016740 0.0375  
ss15095 G0:0046164 <1e-4 slr2003 G0:0043436 <1e-4 sl11053 G0:0043492 <1e-4 slr0656 G0:0005575 <1e-4 slr0147 G0:0003723 0.0375  
sl10787 G0:0006066 <1e-4 slr1023 G0:0044106 <1e-4 slr1999 G0:0015291 <1e-4 ss10410 G0:0044446 <1e-4 slr0937 G0:0016740 0.0375  
ss10467 G0:0006576 <1e-4 sss15113 G0:0046128 <1e-4 sl10763 G0:0015293 <1e-4 slr5102 G0:0044422 <1e-4 slr1917 G0:0016740 0.0375  
slr0813 G0:0090304 <1e-4 sl10525 G0:0051347 <1e-4 sssr1256 G0:0022890 <1e-4 sl10147 G0:0005575 <1e-4 slr1866 G0:0016740 0.0375  
ssr1256 G0:0018130 <1e-4 slr0692 G0:0048878 <1e-4 sl10586 G0:0016817 <1e-4 sl10779 G0:0005575 <1e-4 slr0376 G0:0016740 0.0375  
slr6068 G0:0045184 <1e-4 slr0345 G0:0009057 <1e-4 slr1407 G0:0015267 <1e-4 sssr1155 G0:0043226 <1e-4 slr0304 G0:0016740 0.0375  
sl11414 G0:0005996 <1e-4 slr1927 G0:0034654 <1e-4 sl17089 G0:0022892 <1e-4 sl17089 G0:0005575 <1e-4 sl11472 G0:0016740 0.0375  
slr0392 G0:0022607 <1e-4 sl11797 G0:0051171 <1e-4 slr0269 G0:0022803 <1e-4 slr6045 G0:0005575 <1e-4 sss10109 G0:0016740 0.0375  
ss15129 G0:0009889 <1e-4 sl11510 G0:0009117 <1e-4 sl17078 G0:0016746 <1e-4 sl11722 G0:0044446 <1e-4 slr1083 G0:0016740 0.0375  
slr0607 G0:0009117 <1e-4 slr1095 G0:0044003 <1e-4 sl11751 G0:0016462 <1e-4 slr1472 G0:0044464 <1e-4 sl10424 G0:0016740 0.0375  
slr0195 G0:0051818 <1e-4 slr0765 G0:0043648 <1e-4 slr6016 G0:0016746 <1e-4 slr0380 G0:0044422 <1e-4 slr0909 G0:0005515 0.0369  
slr0521 G0:0009309 <1e-4 slr1862 G0:0009991 <1e-4 sl10172 G0:0022892 <1e-4 sl11063 G0:0044446 <1e-4 sss10353 G0:0005515 0.0369  
ss12733 G0:0042455 <1e-4 sss17007 G0:0019752 <1e-4 slr5077 G0:0015291 <1e-4 sl10360 G0:0044422 <1e-4 sl11562 G0:0005515 0.0369  
slr2118 G0:0019362 <1e-4 sl10498 G0:0022411 <1e-4 slr1338 G0:0022892 <1e-4 sl11583 G0:0044422 <1e-4 sl10505 G0:0005515 0.0369  
sl11834 G0:0009893 <1e-4 slr1577 G0:0051179 <1e-4 slr1534 G0:0015405 <1e-4 slr7012 G0:0043226 <1e-4 slr1767 G0:0005515 0.0369  
sl11004 G0:0042455 <1e-4 sl11352 G0:0052188 <1e-4 sl11021 G0:0043167 <1e-4 sl11643 G0:0044422 <1e-4 slr0607 G0:0005515 0.0369  
slr1866 G0:0009144 <1e-4 sl10428 G0:0006721 <1e-4 sl15063 G0:0022891 <1e-4 sl10735 G0:0044446 <1e-4 sl10788 G0:0005515 0.0369  
sl10503 G0:0050789 <1e-4 sss17022 G0:0009126 <1e-4 slr7092 G0:0015077 <1e-4 sl10296 G0:0044446 <1e-4 slr0514 G0:0005515 0.0369  
slr6068 G0:0044283 <1e-4 sl10263 G0:0019751 <1e-4 sl11891 G0:0016817 <1e-4 slr5101 G0:0044422 <1e-4 slr0479 G0:0005515 0.0369  
sl11072 G0:0010556 <1e-4 sss10410 G0:0065007 <1e-4 sl11965 G0:0042623 <1e-4 sl15028 G0:0005575 <1e-4 sss12733 G0:0005515 0.0369  
slr1657 G0:0034641 <1e-4 sl11469 G0:0006720 <1e-4 sssr1258 G0:0043492 <1e-4 slr0476 G0:0044424 <1e-4 sss10294 G0:0003723 0.0364  
sl11389 G0:0009263 <1e-4 sl16054 G0:0044003 <1e-4 sl10280 G0:0016817 <1e-4 sssr1552 G0:0044444 <1e-4 sl11293 G0:0003723 0.0364  
sl10060 G0:0018130 <1e-4 slr7057 G0:0009991 <1e-4 sl10839 G0:0015399 <1e-4 sl11262 G0:0044424 <1e-4 sl10350 G0:0003723 0.0364  
sl10565 G0:0051716 <1e-4 slr1568 G0:0050896 <1e-4 sss12807 G0:0015399 <1e-4 slr0397 G0:0044425 <1e-4 sl11763 G0:0003723 0.0364  
sl11155 G0:0009263 <1e-4 sl10488 G0:0016053 <1e-4 sl10405 G0:0016741 <1e-4 slr1079 G0:0005575 <1e-4 slr0355 G0:0016772 0.0358  
sl11132 G0:0031326 <1e-4 sl11773 G0:0009309 <1e-4 sl11832 G0:0022838 <1e-4 slr0519 G0:0044464 <1e-4 slr6101 G0:0016772 0.0358  
slr1827 G0:0051234 <1e-4 sl11225 G0:0044248 <1e-4 sl11884 G0:0016746 <1e-4 slr1900 G0:0044464 <1e-4 slr0264 G0:0016772 0.0358  
slr1170 G0:0048518 <1e-4 sl16053 G0:0072524 <1e-4 sl10319 G0:0015291 <1e-4 slr6087 G0:0044446 <1e-4 sl11485 G0:0016772 0.0358  
ss10739 G0:0048522 <1e-4 sl10442 G0:0009142 <1e-4 sssr6027 G0:0022857 <1e-4 sl11552 G0:0044446 <1e-4 slr1660 G0:0016772 0.0358  
sl10068 G0:0034641 <1e-4 slr7083 G0:0072527 <1e-4 slr0980 G0:0022832 <1e-4 sl10786 G0:0044446 <1e-4 slr1104 G0:0016772 0.0358  
sl11640 G0:0046128 <1e-4 slr1052 G0:0009260 <1e-4 sl10761 G0:0015405 <1e-4 sss15031 G0:0044425 <1e-4 sssr2422 G0:0016772 0.0358  
slr2071 G0:0071841 <1e-4 slr1034 G0:0006082 <1e-4 sl11254 G0:0022836 <1e-4 sl11630 G0:0044446 <1e-4 sss13142 G0:0016772 0.0358  
sl17078 G0:0016053 <1e-4 slr7011 G0:0019362 <1e-4 sssr2142 G0:0043167 <1e-4 slr0813 G0:0044446 <1e-4 slr2119 G0:0016772 0.0358  
sl11477 G0:0043170 <1e-4 sss13692 G0:0009056 <1e-4 sl15097 G0:0022890 <1e-4 sss16035 G0:0044444 <1e-4 sl12013 G0:0016772 0.0358  
slr0769 G0:0071496 <1e-4 sl15003 G0:0045184 <1e-4 slr0262 G0:0022836 <1e-4 sl11372 G0:0043226 <1e-4 slr1472 G0:0016772 0.0358  
sl10691 G0:0006163 <1e-4 slr6007 G0:0044260 <1e-4 sl11053 G0:0016818 <1e-4 slr1186 G0:0044422 <1e-4 sssr2912 G0:0016772 0.0358  
sl10048 G0:0006793 <1e-4 sl11654 G0:0006766 <1e-4 sl10410 G0:0005342 <1e-4 sl17064 G0:0044464 <1e-4 slr6013 G0:0016772 0.0358

slr0890 G0:0006811 <1e-4 ssl7042 G0:0046164 <1e-4 ss13382 G0:0022890 <1e-4 slr6104 G0:0044424 <1e-4 ss18003 G0:0016772 0.0358  
ssl13573 G0:0019222 <1e-4 ssl0461 G0:0042451 <1e-4 slr5037 G0:0022857 <1e-4 slr0554 G0:0044422 <1e-4 slr0196 G0:0016772 0.0358  
ssr2067 G0:0034641 <1e-4 ssr6020 G0:0050794 <1e-4 slr0195 G0:0008171 <1e-4 sl10867 G0:0005575 <1e-4 slr1306 G0:0016772 0.0358  
slr2052 G0:0006811 <1e-4 sl10355 G0:0051818 <1e-4 ssr7084 G0:0022857 <1e-4 slr0912 G0:0005575 <1e-4 sl17047 G0:0016772 0.0358  
slr1493 G0:0051234 <1e-4 sl11752 G0:0046164 <1e-4 slr1178 G0:0015077 <1e-4 slr0341 G0:0044464 <1e-4 sl10406 G0:0016772 0.0358  
sl11469 G0:0031640 <1e-4 ssl1972 G0:0022607 <1e-4 sl11063 G0:0008171 <1e-4 sl11527 G0:0044424 <1e-4 sl10048 G0:0016772 0.0358  
sl11359 G0:0048522 <1e-4 sl11757 G0:0009144 <1e-4 slr1365 G0:0015293 <1e-4 slr1819 G0:0044446 <1e-4 ssr0102 G0:0016772 0.0358  
slr1178 G0:0009262 <1e-4 sl11542 G0:0045184 <1e-4 sl18004 G0:0005342 <1e-4 slr0650 G0:0044425 <1e-4 slr1721 G0:0016772 0.0358  
slr0751 G0:0022411 <1e-4 slr1104 G0:0043933 <1e-4 sl10442 G0:0022890 <1e-4 slr7023 G0:0044464 <1e-4 slr1150 G0:0016772 0.0358  
slr0941 G0:0009309 <1e-4 slr0605 G0:0016053 <1e-4 slr7092 G0:0016818 <1e-4 slr1168 G0:0005575 <1e-4 sl11696 G0:0016772 0.0358  
slr5101 G0:0043170 <1e-4 ssr2711 G0:0009260 <1e-4 slr1363 G0:0022890 <1e-4 sl11219 G0:0005575 <1e-4 sl10444 G0:0016772 0.0358  
slr1827 G0:0043933 <1e-4 sl10410 G0:0016054 <1e-4 sl10293 G0:0043167 <1e-4 sl10775 G0:0044464 <1e-4 slr6064 G0:0016772 0.0358  
sl11562 G0:0009889 <1e-4 slr1052 G0:0051246 <1e-4 sl11586 G0:0022891 <1e-4 sl10005 G0:0044444 <1e-4 slr0440 G0:0016772 0.0358  
sl10189 G0:0009057 <1e-4 slr0207 G0:0009165 <1e-4 sl10572 G0:0015293 <1e-4 sl11252 G0:0044422 <1e-4 ssr1407 G0:0016772 0.0358  
sl15069 G0:0044275 <1e-4 slr0602 G0:0065007 <1e-4 sl11135 G0:0016746 <1e-4 slr0383 G0:0005575 <1e-4 slr1464 G0:0016772 0.0358  
sl11002 G0:0022607 <1e-4 slr1218 G0:0060255 <1e-4 sl10473 G0:0015075 <1e-4 sl11142 G0:0005575 <1e-4 ssr6046 G0:0016772 0.0358  
slr2105 G0:0009889 <1e-4 sl10149 G0:0009117 <1e-4 ssr1375 G0:0015291 <1e-4 sl10564 G0:0043226 <1e-4 sl12015 G0:0016772 0.0358  
sl18040 G0:0009309 <1e-4 slr6044 G0:0006732 <1e-4 slr1918 G0:0015293 <1e-4 sl10400 G0:0044444 <1e-4 ss12920 G0:0016772 0.0358  
sl10191 G0:0009394 <1e-4 sl11764 G0:0019222 <1e-4 slr2103 G0:0022857 <1e-4 sl11119 G0:0005575 <1e-4 sl11766 G0:0016772 0.0358  
slr0112 G0:0046394 <1e-4 slr1767 G0:0001932 <1e-4 slr1097 G0:0022891 <1e-4 sl11751 G0:0044444 <1e-4 ss11923 G0:0016772 0.0358  
slr1773 G0:0051347 <1e-4 sl10498 G0:0006720 <1e-4 slr1788 G0:0016818 <1e-4 sl11399 G0:0044424 <1e-4 slr2010 G0:0016772 0.0358  
slr0360 G0:0009987 <1e-4 sl10283 G0:0055082 <1e-4 slr0076 G0:0015077 <1e-4 slr5126 G0:0005575 <1e-4 sl11063 G0:0016772 0.0358  
sl11862 G0:0072522 <1e-4 slr1917 G0:0051188 <1e-4 slr0364 G0:0016817 <1e-4 sg10002 G0:0043226 <1e-4 slr7059 G0:0016772 0.0358  
sl10479 G0:0048519 <1e-4 slr0291 G0:0019752 <1e-4 slr0723 G0:0022803 <1e-4 slr1958 G0:0044424 <1e-4 slr1270 G0:0016772 0.0358  
ssl1520 G0:0050896 <1e-4 ssl3829 G0:0005996 <1e-4 slr1752 G0:0005342 <1e-4 sl11882 G0:0044422 <1e-4 slr1484 G0:0016772 0.0358  
slr1721 G0:0044275 <1e-4 sl10298 G0:0006811 <1e-4 ssl7042 G0:0003674 <1e-4 sl11225 G0:0044424 <1e-4 slr0148 G0:0016772 0.0358  
slr0725 G0:0019751 <1e-4 slr1128 G0:0071842 <1e-4 slr1704 G0:0022803 <1e-4 sl11232 G0:0044464 <1e-4 slr1260 G0:0016772 0.0358  
slr1068 G0:0009132 <1e-4 slr0479 G0:0042455 <1e-4 slr1315 G0:0043167 <1e-4 sl10280 G0:0044422 <1e-4 ss15007 G0:0016772 0.0358  
ssl1552 G0:0009260 <1e-4 slr0771 G0:0051246 <1e-4 slr1468 G0:0015399 <1e-4 slr6015 G0:0043226 <1e-4 sl10008 G0:0016772 0.0358  
slr1998 G0:0009259 <1e-4 ssl2420 G0:0071840 <1e-4 sl11378 G0:0043167 <1e-4 ssr6079 G0:0043226 <1e-4 sl10397 G0:0016772 0.0358  
slr2121 G0:0051347 <1e-4 slr1087 G0:0009056 <1e-4 slr8021 G0:0015399 <1e-4 slr1513 G0:0044444 <1e-4 slr6015 G0:0016772 0.0358  
ssl5095 G0:0022607 <1e-4 sl11252 G0:0009259 <1e-4 sl10710 G0:0042623 <1e-4 slr0199 G0:0044424 <1e-4 sl10857 G0:0016772 0.0358  
sl10886 G0:0072527 <1e-4 sl11873 G0:0009059 <1e-4 slr5119 G0:0016746 <1e-4 sl11773 G0:0044444 <1e-4 ssr1766 G0:0016772 0.0358  
ssr2755 G0:0071496 <1e-4 sl10996 G0:0006066 <1e-4 ss15068 G0:0015405 <1e-4 sl11306 G0:0005575 <1e-4 ssr6020 G0:0016772 0.0358  
ssl15129 G0:0044255 <1e-4 slr1376 G0:0050794 <1e-4 sl11714 G0:0016817 <1e-4 slr1959 G0:0044446 <1e-4 sl15097 G0:0016772 0.0358  
slr0770 G0:0043648 <1e-4 ssr2755 G0:0048878 <1e-4 slr0869 G0:0016741 <1e-4 sl11486 G0:0005575 <1e-4 slr1546 G0:0016772 0.0358  
slr1162 G0:0043412 <1e-4 sl11949 G0:0034641 <1e-4 slr0651 G0:0008171 <1e-4 slr0810 G0:0043226 <1e-4 slr1178 G0:0016772 0.0358  
slr0708 G0:0055086 <1e-4 sl12013 G0:0071841 <1e-4 slr1788 G0:0022838 <1e-4 slr1045 G0:0044444 <1e-4 sl11880 G0:0016772 0.0358  
ssl7038 G0:0072528 <1e-4 slr0569 G0:0005996 <1e-4 ssl3829 G0:0022838 <1e-4 slr0092 G0:0044446 <1e-4 ss10738 G0:0016772 0.0358  
ssl0832 G0:0046483 <1e-4 slr6081 G0:0043648 <1e-4 ssl1918 G0:0022838 <1e-4 slr0708 G0:0044424 <1e-4 slr7101 G0:0016772 0.0358  
sl11942 G0:0071554 <1e-4 sl17065 G0:0065007 <1e-4 sl11378 G0:0015399 <1e-4 sl10293 G0:0044425 <1e-4 slr6090 G0:0016772 0.0358  
slr2060 G0:0006066 <1e-4 sl11858 G0:0051716 <1e-4 slr2101 G0:0016818 <1e-4 slr0801 G0:0044422 <1e-4 sl11447 G0:0016772 0.0358  
slr1618 G0:0019637 <1e-4 slr6031 G0:0048518 <1e-4 slr5018 G0:0005342 <1e-4 sl10071 G0:0044424 <1e-4 sl10174 G0:0016772 0.0358  
ssl0750 G0:0009262 <1e-4 sl11401 G0:0060255 <1e-4 slr0709 G0:0003674 <1e-4 sl10803 G0:0005575 <1e-4 sl10168 G0:0016772 0.0358  
slr1087 G0:0044248 <1e-4 sl11563 G0:0034641 <1e-4 slr8021 G0:0008171 <1e-4 ssr0536 G0:0044464 <1e-4 slr0151 G0:0016772 0.0358  
slr0299 G0:0044271 <1e-4 sl18012 G0:0072528 <1e-4 slr1417 G0:0016741 <1e-4 slr0658 G0:0044422 <1e-4 slr0356 G0:0016772 0.0358  
ssr0102 G0:0071840 <1e-4 sl11765 G0:0006721 <1e-4 slr0109 G0:0043492 <1e-4 sl11254 G0:0044464 <1e-4 ssl1520 G0:0016772 0.0358  
ssr7079 G0:0009262 <1e-4 sl11698 G0:0072524 <1e-4 slr0913 G0:0022832 <1e-4 slr5101 G0:0044464 <1e-4 sl11571 G0:0016772 0.0358  
ssr3341 G0:0009142 <1e-4 slr0172 G0:0009892 <1e-4 slr0408 G0:0016817 <1e-4 sl10241 G0:0044446 <1e-4 sl15026 G0:0016772 0.0358  
sl17050 G0:0051186 <1e-4 sl11273 G0:0009123 <1e-4 sl11400 G0:0016818 <1e-4 ssr7072 G0:0044446 <1e-4 slr1863 G0:0016772 0.0358  
slr1917 G0:0055114 <1e-4 slr1618 G0:0048519 <1e-4 ssr0335 G0:0043492 <1e-4 slr1107 G0:0044446 <1e-4 slr1566 G0:0016772 0.0358  
slr0888 G0:0006721 <1e-4 sl11832 G0:0052188 <1e-4 sl11528 G0:0022838 <1e-4 sl10563 G0:0005575 <1e-4 sl11769 G0:0016772 0.0358  
sl10931 G0:0006720 <1e-4 sl11921 G0:0048878 <1e-4 sl10188 G0:0022803 <1e-4 slr0921 G0:0044422 <1e-4 sl11092 G0:0016772 0.0358  
sl11764 G0:0009161 <1e-4 sl10310 G0:0009165 <1e-4 slr1417 G0:0015267 <1e-4 slr1944 G0:0044424 <1e-4 slr1534 G0:0016772 0.0358

|         |            |       |         |            |       |         |            |       |         |            |       |         |            |        |
|---------|------------|-------|---------|------------|-------|---------|------------|-------|---------|------------|-------|---------|------------|--------|
| slr1809 | G0:0009260 | <1e-4 | slr7010 | G0:0009394 | <1e-4 | sl15033 | G0:0016818 | <1e-4 | sl11262 | G0:0044425 | <1e-4 | sl10518 | G0:0016772 | 0.0358 |
| slr1753 | G0:0034641 | <1e-4 | slr0356 | G0:0044283 | <1e-4 | slr2003 | G0:0015293 | <1e-4 | slr0878 | G0:0005575 | <1e-4 | slr1095 | G0:0016772 | 0.0358 |
| slr1472 | G0:0044106 | <1e-4 | sl10871 | G0:0019219 | <1e-4 | sl10676 | G0:0008171 | <1e-4 | sl11072 | G0:0044425 | <1e-4 | sl15033 | G0:0016772 | 0.0358 |
| slr1083 | G0:0043412 | <1e-4 | sl10098 | G0:0051234 | <1e-4 | slr1288 | G0:0022803 | <1e-4 | slr1978 | G0:0044446 | <1e-4 | sl11306 | G0:0016772 | 0.0358 |
| sl11527 | G0:0009142 | <1e-4 | slr2027 | G0:0009165 | <1e-4 | slr0341 | G0:0060089 | <1e-4 | sl11765 | G0:0044422 | <1e-4 | ss11792 | G0:0016772 | 0.0358 |
| sl10839 | G0:0043933 | <1e-4 | slr0921 | G0:0006066 | <1e-4 | slr1541 | G0:0015077 | <1e-4 | slr1576 | G0:0043226 | <1e-4 | sl11400 | G0:0016772 | 0.0358 |
| slr1809 | G0:0072528 | <1e-4 | slr1081 | G0:0044283 | <1e-4 | sl10488 | G0:0016829 | <1e-4 | slr0480 | G0:0044464 | <1e-4 | slr1864 | G0:0016772 | 0.0358 |
| sl10860 | G0:0009892 | <1e-4 | sl10294 | G0:0019362 | <1e-4 | slr1800 | G0:0022838 | <1e-4 | sl11239 | G0:0044424 | <1e-4 | sl10167 | G0:0016772 | 0.0358 |
| sl11912 | G0:0006732 | <1e-4 | ssr6024 | G0:0009150 | <1e-4 | sl15089 | G0:0016817 | <1e-4 | slr0169 | G0:0044446 | <1e-4 | slr0199 | G0:0016772 | 0.0358 |
| slr7024 | G0:0044260 | <1e-4 | sl10585 | G0:0019752 | <1e-4 | sl10394 | G0:0016818 | <1e-4 | slr0598 | G0:0044424 | <1e-4 | sl17062 | G0:0016772 | 0.0358 |
| sl10670 | G0:0005996 | <1e-4 | sl11698 | G0:0009987 | <1e-4 | slr0262 | G0:0022891 | <1e-4 | sl11472 | G0:0044422 | <1e-4 | ssr3189 | G0:0016772 | 0.0358 |
| ssr1499 | G0:0019219 | <1e-4 | ssr6086 | G0:0019362 | <1e-4 | ssr2318 | G0:0022803 | <1e-4 | slr0264 | G0:0043226 | <1e-4 | slr0821 | G0:0016772 | 0.0358 |
| sl10658 | G0:0031640 | <1e-4 | sl10525 | G0:0006732 | <1e-4 | sl10854 | G0:0016462 | <1e-4 | ss11255 | G0:0005575 | <1e-4 | slr0870 | G0:0016772 | 0.0358 |
| sl10543 | G0:0080090 | <1e-4 | slr7024 | G0:0019751 | <1e-4 | sl11961 | G0:0015075 | <1e-4 | slr2118 | G0:0044422 | <1e-4 | sl11160 | G0:0016772 | 0.0358 |
| slr0552 | G0:0052188 | <1e-4 | sl11902 | G0:0051716 | <1e-4 | slr1944 | G0:0022836 | <1e-4 | sl11680 | G0:0044444 | <1e-4 | slr1753 | G0:0016772 | 0.0358 |
| sl11142 | G0:0071842 | <1e-4 | sl10608 | G0:0044275 | <1e-4 | sl10710 | G0:0015405 | <1e-4 | sl11503 | G0:0044446 | <1e-4 | sl18032 | G0:0016772 | 0.0358 |
| slr0914 | G0:0009394 | <1e-4 | ss15007 | G0:0005996 | <1e-4 | sl11738 | G0:0015267 | <1e-4 | slr0967 | G0:0044424 | <1e-4 | slr2032 | G0:0016772 | 0.0358 |
| slr1677 | G0:0009199 | <1e-4 | slr0142 | G0:0044283 | <1e-4 | slr1565 | G0:0015291 | <1e-4 | ssr6002 | G0:0044464 | <1e-4 | slr0606 | G0:0016772 | 0.0358 |
| sl11717 | G0:0006091 | <1e-4 | sl15069 | G0:0019362 | <1e-4 | slr0416 | G0:0022803 | <1e-4 | slr1104 | G0:0044446 | <1e-4 | slr1920 | G0:0016772 | 0.0358 |
| slr7014 | G0:0009308 | <1e-4 | sl10456 | G0:0016054 | <1e-4 | sl11063 | G0:0022891 | <1e-4 | sl10381 | G0:0044446 | <1e-4 | slr0912 | G0:0016772 | 0.0358 |
| slr0199 | G0:0043648 | <1e-4 | slr2070 | G0:0055082 | <1e-4 | ssr6062 | G0:0015075 | <1e-4 | slr1599 | G0:0044446 | <1e-4 | sl11509 | G0:0016772 | 0.0358 |
| sl10995 | G0:0046394 | <1e-4 | sl18011 | G0:0044282 | <1e-4 | slr1767 | G0:0022803 | <1e-4 | slr1676 | G0:0044422 | <1e-4 | slr2105 | G0:0016772 | 0.0358 |
| sl10381 | G0:0009991 | <1e-4 | ssr1951 | G0:0050896 | <1e-4 | sl10442 | G0:0016818 | <1e-4 | slr0337 | G0:0005575 | <1e-4 | slr6031 | G0:0016772 | 0.0358 |
| sl10072 | G0:0016053 | <1e-4 | slr1195 | G0:0046907 | <1e-4 | sl11373 | G0:0016746 | <1e-4 | sl10822 | G0:0044424 | <1e-4 | slr6008 | G0:0016772 | 0.0358 |
| sl10854 | G0:0055082 | <1e-4 | sl12011 | G0:0072527 | <1e-4 | ss12971 | G0:0005342 | <1e-4 | slr0514 | G0:0044444 | <1e-4 | sl11961 | G0:0016772 | 0.0358 |
| sl17070 | G0:0072527 | <1e-4 | slr5118 | G0:0019222 | <1e-4 | slr1186 | G0:0022838 | <1e-4 | ss13379 | G0:0005575 | <1e-4 | slr0398 | G0:0016772 | 0.0358 |
| sl11036 | G0:0019752 | <1e-4 | slr0172 | G0:0018130 | <1e-4 | slr1923 | G0:0015077 | <1e-4 | slr1576 | G0:0044424 | <1e-4 | slr7016 | G0:0016772 | 0.0358 |
| sl10775 | G0:0046164 | <1e-4 | sl10854 | G0:0048518 | <1e-4 | slr1990 | G0:0022836 | <1e-4 | slr0960 | G0:0005575 | <1e-4 | sl11783 | G0:0016772 | 0.0358 |
| ss15091 | G0:0010468 | <1e-4 | slr0975 | G0:0051347 | <1e-4 | sl11132 | G0:0043167 | <1e-4 | ss18003 | G0:0005575 | <1e-4 | slr1914 | G0:0016772 | 0.0358 |
| slr1303 | G0:0071554 | <1e-4 | sl17077 | G0:0009059 | <1e-4 | ssr1114 | G0:0022892 | <1e-4 | sl11095 | G0:0044424 | <1e-4 | sl11022 | G0:0016772 | 0.0358 |
| slr0326 | G0:0042180 | <1e-4 | slr1365 | G0:0006576 | <1e-4 | sl10189 | G0:0015291 | <1e-4 | sl11469 | G0:0044464 | <1e-4 | ss13379 | G0:0016772 | 0.0358 |
| sl11442 | G0:0006793 | <1e-4 | sl10994 | G0:0080090 | <1e-4 | slr1025 | G0:0015077 | <1e-4 | sl11173 | G0:0043226 | <1e-4 | slr6006 | G0:0016772 | 0.0358 |
| sl10553 | G0:0009132 | <1e-4 | sl11021 | G0:0009150 | <1e-4 | slr0689 | G0:0043492 | <1e-4 | sl10623 | G0:0044464 | <1e-4 | ssr0335 | G0:0044237 | 0.0357 |
| sl11381 | G0:0034641 | <1e-4 | slr1290 | G0:0046128 | <1e-4 | slr2121 | G0:0016818 | <1e-4 | slr1544 | G0:0044425 | <1e-4 | sl11232 | G0:0044237 | 0.0357 |
| sl10101 | G0:0009892 | <1e-4 | sl10994 | G0:0006082 | <1e-4 | slr0270 | G0:0060089 | <1e-4 | slr0302 | G0:0005575 | <1e-4 | sl11638 | G0:0044237 | 0.0357 |
| sl10007 | G0:0044248 | <1e-4 | slr0211 | G0:0001932 | <1e-4 | slr0888 | G0:0015405 | <1e-4 | sl11433 | G0:0044444 | <1e-4 | sl10181 | G0:0044237 | 0.0357 |
| slr0317 | G0:0044271 | <1e-4 | sl11751 | G0:0060255 | <1e-4 | sl10996 | G0:0015399 | <1e-4 | slr1363 | G0:0005575 | <1e-4 | sl10994 | G0:0044237 | 0.0357 |
| sl16054 | G0:0008610 | <1e-4 | slr1097 | G0:0009260 | <1e-4 | sl11530 | G0:0022857 | <1e-4 | sl11949 | G0:0044424 | <1e-4 | ss12920 | G0:0044237 | 0.0357 |
| slr6073 | G0:0065007 | <1e-4 | sl10503 | G0:0044255 | <1e-4 | sl11921 | G0:0016746 | <1e-4 | slr1273 | G0:0044464 | <1e-4 | slr1546 | G0:0044237 | 0.0357 |
| slr0592 | G0:0060255 | <1e-4 | slr1507 | G0:0009893 | <1e-4 | slr0456 | G0:0016741 | <1e-4 | sl10931 | G0:0044446 | <1e-4 | sl11400 | G0:0044237 | 0.0357 |
| sl10436 | G0:0009059 | <1e-4 | slr0313 | G0:0071842 | <1e-4 | sl11542 | G0:0043492 | <1e-4 | sl10147 | G0:0044446 | <1e-4 | sl10102 | G0:0044237 | 0.0357 |
| sl10022 | G0:0090304 | <1e-4 | slr1926 | G0:0009308 | <1e-4 | slr0192 | G0:0022890 | <1e-4 | slr0960 | G0:0044444 | <1e-4 | sl11414 | G0:0044237 | 0.0357 |
| ssr7084 | G0:0009056 | <1e-4 | ssr0332 | G0:0009132 | <1e-4 | slr1493 | G0:0016817 | <1e-4 | slr1162 | G0:0044422 | <1e-4 | slr7092 | G0:0044237 | 0.0357 |
| slr0712 | G0:0009893 | <1e-4 | slr0912 | G0:0072524 | <1e-4 | sl10888 | G0:0022836 | <1e-4 | slr0303 | G0:0005575 | <1e-4 | ssr7036 | G0:0044237 | 0.0357 |
| slr1273 | G0:0045184 | <1e-4 | slr1847 | G0:0034641 | <1e-4 | sl11472 | G0:0022857 | <1e-4 | ssr2848 | G0:0043226 | <1e-4 | slr6013 | G0:0044237 | 0.0357 |
| sl18002 | G0:0042180 | <1e-4 | ssr2333 | G0:0022607 | <1e-4 | sl10508 | G0:0016818 | <1e-4 | sl10763 | G0:0005575 | <1e-4 | slr7011 | G0:0044237 | 0.0357 |
| sl10602 | G0:0031326 | <1e-4 | sl11052 | G0:0071496 | <1e-4 | slr0076 | G0:0022891 | <1e-4 | sl10177 | G0:0043226 | <1e-4 | slr6015 | G0:0044237 | 0.0357 |
| sl11510 | G0:0009889 | <1e-4 | sl11965 | G0:0046164 | <1e-4 | sl10863 | G0:0022890 | <1e-4 | slr1762 | G0:0044422 | <1e-4 | slr7023 | G0:0044237 | 0.0357 |
| sl11658 | G0:0008150 | <1e-4 | ssr2787 | G0:0042180 | <1e-4 | sl11882 | G0:0016462 | <1e-4 | slr1789 | G0:0044422 | <1e-4 | slr7097 | G0:0044237 | 0.0357 |
| ssr7036 | G0:0009161 | <1e-4 | slr1495 | G0:0009987 | <1e-4 | sl11135 | G0:0060089 | <1e-4 | slr1103 | G0:0044422 | <1e-4 | slr6047 | G0:0044237 | 0.0357 |
| slr6091 | G0:0019362 | <1e-4 | sl11835 | G0:0009394 | <1e-4 | slr1150 | G0:0015405 | <1e-4 | sl10446 | G0:0044424 | <1e-4 | sl10872 | G0:0044237 | 0.0357 |
| ssr6026 | G0:0046128 | <1e-4 | sl10860 | G0:0006631 | <1e-4 | sl10096 | G0:0042623 | <1e-4 | sm10011 | G0:0044464 | <1e-4 | sl11062 | G0:0044237 | 0.0357 |
| slr0345 | G0:0065007 | <1e-4 | sl17063 | G0:0006576 | <1e-4 | sl10788 | G0:0022892 | <1e-4 | sl11344 | G0:0044446 | <1e-4 | sl10174 | G0:0044237 | 0.0357 |
| slr1034 | G0:0031323 | <1e-4 | sl11950 | G0:0052111 | <1e-4 | sl10751 | G0:0016462 | <1e-4 | sl11192 | G0:0043226 | <1e-4 | sl11217 | G0:0044237 | 0.0357 |

s115006 GO:0009132 <1e-4 s111965 GO:0009889 <1e-4 s111942 GO:0015399 <1e-4 s110736 GO:0044425 <1e-4 s111880 GO:0044237 0.0357  
slr1470 GO:0048523 <1e-4 s110786 GO:0019222 <1e-4 ss15100 GO:0022838 <1e-4 slr2125 GO:0044424 <1e-4 slr7016 GO:0044237 0.0357  
s110249 GO:0043412 <1e-4 s111730 GO:0050794 <1e-4 slr1726 GO:0043167 <1e-4 slr1900 GO:0044424 <1e-4 slr1150 GO:0044237 0.0357  
slr5018 GO:0006753 <1e-4 slr0269 GO:0009142 <1e-4 ss17039 GO:0015405 <1e-4 s110473 GO:0044422 <1e-4 slr5017 GO:0044237 0.0357  
s110361 GO:0019362 <1e-4 slr0813 GO:0044271 <1e-4 slr6005 GO:0016462 <1e-4 slr1978 GO:0005575 <1e-4 slr1365 GO:0044237 0.0357  
slr1415 GO:0019219 <1e-4 slr6031 GO:0034641 <1e-4 s111251 GO:0008171 <1e-4 s111267 GO:0044422 <1e-4 slr1462 GO:0044237 0.0357  
slr1391 GO:0009117 <1e-4 s110294 GO:0048522 <1e-4 s110688 GO:0015405 <1e-4 s110369 GO:0044446 <1e-4 s110369 GO:0044237 0.0357  
s110854 GO:0006720 <1e-4 slr1376 GO:0008150 <1e-4 s110857 GO:0022857 <1e-4 slr6039 GO:0043226 <1e-4 s115034 GO:0044237 0.0357  
slr1638 GO:0010468 <1e-4 s112011 GO:0009123 <1e-4 s117050 GO:0015399 <1e-4 s110008 GO:0044446 <1e-4 slr0058 GO:0044237 0.0357  
s110406 GO:0050801 <1e-4 slr6029 GO:0006732 <1e-4 s117078 GO:0015399 <1e-4 sss2439 GO:0044464 <1e-4 sss2912 GO:0044237 0.0357  
slr1920 GO:0072527 <1e-4 slr5102 GO:0051171 <1e-4 slr1142 GO:0015075 <1e-4 slr0482 GO:0044425 <1e-4 sss5120 GO:0044237 0.0357  
s110858 GO:0019219 <1e-4 s110242 GO:0009263 <1e-4 slr5111 GO:0042623 <1e-4 slr0521 GO:0044446 <1e-4 slr0148 GO:0044237 0.0357  
s115030 GO:0051179 <1e-4 s117050 GO:0022411 <1e-4 ss15096 GO:0015291 <1e-4 sss1407 GO:0044444 <1e-4 s111401 GO:0044237 0.0357  
slr1768 GO:0034641 <1e-4 slr1573 GO:0046483 <1e-4 slr5013 GO:0003674 <1e-4 slr1590 GO:0044464 <1e-4 s115032 GO:0044237 0.0357  
s110913 GO:0050789 <1e-4 sss0335 GO:0060255 <1e-4 s110225 GO:0060089 <1e-4 slr1484 GO:0044425 <1e-4 ss15007 GO:0044237 0.0357  
slr1495 GO:0052111 <1e-4 s111201 GO:0008150 <1e-4 slr1438 GO:0003674 <1e-4 slr0954 GO:0044424 <1e-4 s110760 GO:0044237 0.0357  
s110060 GO:0048522 <1e-4 sss2047 GO:0051171 <1e-4 s111396 GO:0015077 <1e-4 sss6078 GO:0044422 <1e-4 sss6048 GO:0044237 0.0357  
s111757 GO:0009991 <1e-4 sss2998 GO:0009892 <1e-4 slr1546 GO:0015293 <1e-4 slr2010 GO:0044424 <1e-4 slr0362 GO:0044237 0.0357  
sss1768 GO:0031640 <1e-4 slr0709 GO:0001932 <1e-4 ss13379 GO:0022892 <1e-4 s110230 GO:0005575 <1e-4 slr1600 GO:0044237 0.0357  
s110335 GO:0008150 <1e-4 slr8022 GO:0019222 <1e-4 ss15045 GO:0022891 <1e-4 slr0667 GO:0044446 <1e-4 s111769 GO:0044237 0.0357  
slr0818 GO:0016054 <1e-4 slr1886 GO:0006753 <1e-4 slr0325 GO:0060089 <1e-4 slr0468 GO:0044424 <1e-4 s111651 GO:0044237 0.0357  
s111267 GO:0009056 <1e-4 sss1256 GO:0048522 <1e-4 s110147 GO:0015075 <1e-4 slr0172 GO:0005575 <1e-4 slr5018 GO:0044237 0.0357  
s110676 GO:0008150 <1e-4 slr1083 GO:0051188 <1e-4 ss10467 GO:0042623 <1e-4 slr0082 GO:0044446 <1e-4 s110406 GO:0044237 0.0357  
slr7102 GO:0006732 <1e-4 slr0423 GO:0055114 <1e-4 sss1155 GO:0022836 <1e-4 slr0106 GO:0005575 <1e-4 s117047 GO:0044237 0.0357  
sss3154 GO:0080090 <1e-4 s110400 GO:0044283 <1e-4 slr1923 GO:0016746 <1e-4 s111714 GO:0044464 <1e-4 sg10001 GO:0044237 0.0357  
s110085 GO:0034660 <1e-4 s111486 GO:0051716 <1e-4 s111763 GO:0015075 <1e-4 s110274 GO:0044425 <1e-4 slr6007 GO:0044237 0.0357  
s111203 GO:0009142 <1e-4 slr0376 GO:0072528 <1e-4 slr0865 GO:0043167 <1e-4 slr0106 GO:0044425 <1e-4 s110423 GO:0044237 0.0357  
sss2843 GO:0009142 <1e-4 s110238 GO:0009165 <1e-4 slr1566 GO:0016741 <1e-4 slr1768 GO:0044422 <1e-4 s110176 GO:0044237 0.0357  
slr0976 GO:0044281 <1e-4 slr0885 GO:0019752 <1e-4 slr0250 GO:0015075 <1e-4 slr0924 GO:0043226 <1e-4 slr6031 GO:0044237 0.0357  
slr1095 GO:0042180 <1e-4 s110327 GO:0022607 <1e-4 ss17045 GO:0043492 <1e-4 slr0975 GO:0005575 <1e-4 slr7081 GO:0044237 0.0357  
s111571 GO:0009141 <1e-4 slr0695 GO:0071496 <1e-4 sss6083 GO:0060089 <1e-4 slr1170 GO:0043226 <1e-4 s115062 GO:0044237 0.0357  
s110448 GO:0044106 <1e-4 slr1097 GO:0052111 <1e-4 slr0334 GO:0022803 <1e-4 slr0023 GO:0005575 <1e-4 slr1611 GO:0044237 0.0357  
s111765 GO:0055086 <1e-4 s111736 GO:0051818 <1e-4 slr0602 GO:0043492 <1e-4 s110742 GO:0044424 <1e-4 s117064 GO:0044237 0.0357  
s115130 GO:0044260 <1e-4 sss3122 GO:0042455 <1e-4 sss2317 GO:0016462 <1e-4 ss11046 GO:0043226 <1e-4 s110786 GO:0044237 0.0357  
s111424 GO:0051234 <1e-4 slr6022 GO:0009059 <1e-4 s110994 GO:0016462 <1e-4 s110875 GO:0044446 <1e-4 s111510 GO:0044237 0.0357  
slr1087 GO:0072521 <1e-4 s111512 GO:0006631 <1e-4 slr0554 GO:0015405 <1e-4 s110069 GO:0005575 <1e-4 slr1923 GO:0044237 0.0357  
ss11004 GO:0009124 <1e-4 slr1084 GO:0009987 <1e-4 slr1303 GO:0015293 <1e-4 sss2553 GO:0044446 <1e-4 slr0890 GO:0044237 0.0357  
s110737 GO:0031323 <1e-4 s111319 GO:0009161 <1e-4 sss5011 GO:0016817 <1e-4 s111262 GO:0043226 <1e-4 s110265 GO:0044237 0.0357  
slr1799 GO:0072522 <1e-4 slr1915 GO:0072521 <1e-4 s118033 GO:0016817 <1e-4 s111547 GO:0044446 <1e-4 ss15096 GO:0044237 0.0357  
slr7071 GO:0034641 <1e-4 s111902 GO:0019751 <1e-4 s111123 GO:0022890 <1e-4 slr2060 GO:0044422 <1e-4 slr0870 GO:0044237 0.0357  
s111025 GO:0009132 <1e-4 slr6029 GO:0065007 <1e-4 slr1865 GO:0015399 <1e-4 sss2317 GO:0005575 <1e-4 ss17046 GO:0044237 0.0357  
sss2781 GO:0050896 <1e-4 s115033 GO:0055114 <1e-4 slr1866 GO:0015075 <1e-4 s111542 GO:0043226 <1e-4 s111884 GO:0044237 0.0357  
slr1288 GO:0043412 <1e-4 s110864 GO:0043648 <1e-4 slr0848 GO:0016817 <1e-4 s111106 GO:0044424 <1e-4 slr6021 GO:0044237 0.0357  
slr0587 GO:0031640 <1e-4 s111853 GO:0009309 <1e-4 slr0108 GO:0043167 <1e-4 s111131 GO:0044422 <1e-4 s110218 GO:0044237 0.0357  
ss13692 GO:0009126 <1e-4 sss3402 GO:0019637 <1e-4 slr0592 GO:0022836 <1e-4 slr2032 GO:0044424 <1e-4 slr0199 GO:0044237 0.0357  
slr5126 GO:0018130 <1e-4 sss5074 GO:0009987 <1e-4 sss2611 GO:0015291 <1e-4 s110243 GO:0044422 <1e-4 ss11004 GO:0044237 0.0357  
sss5120 GO:0006721 <1e-4 slr1807 GO:0050896 <1e-4 sg10002 GO:0015293 <1e-4 slr0670 GO:0044446 <1e-4 slr1195 GO:0044237 0.0357  
slr1603 GO:0043933 <1e-4 s111307 GO:0044106 <1e-4 slr0586 GO:0022803 <1e-4 s115097 GO:0005575 <1e-4 slr0356 GO:0044237 0.0357  
s110577 GO:0009144 <1e-4 slr6073 GO:0006811 <1e-4 slr0937 GO:0015267 <1e-4 slr7101 GO:0044446 <1e-4 ss10738 GO:0044237 0.0357  
s111476 GO:0048522 <1e-4 slr2004 GO:0033013 <1e-4 slr5102 GO:0022891 <1e-4 s110328 GO:0043226 <1e-4 slr1957 GO:0044237 0.0357  
sss1766 GO:0046128 <1e-4 s117047 GO:0044281 <1e-4 s111254 GO:0042623 <1e-4 s111738 GO:0044444 <1e-4 slr0049 GO:0044237 0.0357  
s111380 GO:0031326 <1e-4 slr0664 GO:0009309 <1e-4 slr1819 GO:0022857 <1e-4 sss6083 GO:0043226 <1e-4 sss5020 GO:0044237 0.0357  
slr5021 GO:0009141 <1e-4 slr1071 GO:0010556 <1e-4 s110397 GO:0015399 <1e-4 slr6050 GO:0005575 <1e-4 s115006 GO:0044237 0.0357  
s111089 GO:0050801 <1e-4 slr1391 GO:0071554 <1e-4 slr1537 GO:0015267 <1e-4 s110071 GO:0044425 <1e-4 slr1864 GO:0044237 0.0357

|         |            |       |         |            |       |         |            |       |         |            |       |         |            |        |
|---------|------------|-------|---------|------------|-------|---------|------------|-------|---------|------------|-------|---------|------------|--------|
| s111552 | G0:0045184 | <1e-4 | ssr0761 | G0:0009260 | <1e-4 | ss11552 | G0:0005342 | <1e-4 | s111960 | G0:0044424 | <1e-4 | s1r7025 | G0:0044237 | 0.0357 |
| s110584 | G0:0009893 | <1e-4 | s1r1082 | G0:0051716 | <1e-4 | s110230 | G0:0022892 | <1e-4 | s110451 | G0:0044422 | <1e-4 | s1r0959 | G0:0044237 | 0.0357 |
| s1r0285 | G0:0009259 | <1e-4 | s111691 | G0:0009987 | <1e-4 | s111797 | G0:0016817 | <1e-4 | s110269 | G0:0005575 | <1e-4 | ssr6026 | G0:0044237 | 0.0357 |
| s115033 | G0:0006082 | <1e-4 | s1r1222 | G0:0050801 | <1e-4 | s111722 | G0:0015267 | <1e-4 | s111155 | G0:0005575 | <1e-4 | s110630 | G0:0044237 | 0.0357 |
| s1r0930 | G0:0051716 | <1e-4 | s112007 | G0:0009259 | <1e-4 | s1r1169 | G0:0016741 | <1e-4 | s1r5023 | G0:0044464 | <1e-4 | s1r0806 | G0:0044237 | 0.0357 |
| s111166 | G0:0009991 | <1e-4 | ssr7036 | G0:0009987 | <1e-4 | ssr7072 | G0:0016746 | <1e-4 | s1r0989 | G0:0044464 | <1e-4 | s1r0569 | G0:0044237 | 0.0357 |
| s110072 | G0:0072528 | <1e-4 | s1r0294 | G0:0006066 | <1e-4 | s1r1799 | G0:0022890 | <1e-4 | s1r1398 | G0:0005575 | <1e-4 | s110867 | G0:0044237 | 0.0357 |
| s110310 | G0:0009126 | <1e-4 | s1r1816 | G0:0044283 | <1e-4 | s1r2012 | G0:0016746 | <1e-4 | s111400 | G0:0044424 | <1e-4 | ssr1499 | G0:0044237 | 0.0357 |
| s1r0023 | G0:0044248 | <1e-4 | s110355 | G0:0009161 | <1e-4 | s1r0442 | G0:0060089 | <1e-4 | s111142 | G0:0044425 | <1e-4 | s116053 | G0:0044237 | 0.0357 |
| s1r1505 | G0:0043933 | <1e-4 | s110310 | G0:0060255 | <1e-4 | s1r1169 | G0:0008171 | <1e-4 | s110359 | G0:0005575 | <1e-4 | s1r0398 | G0:0044237 | 0.0357 |
| s1r1259 | G0:0044248 | <1e-4 | s1r1116 | G0:0006793 | <1e-4 | s1r2144 | G0:0022892 | <1e-4 | ssr1499 | G0:0044446 | <1e-4 | s110328 | G0:0044237 | 0.0357 |
| ssr2972 | G0:0009123 | <1e-4 | s1r0111 | G0:0033013 | <1e-4 | sm10011 | G0:0005342 | <1e-4 | s1r1117 | G0:0044422 | <1e-4 | s1r1464 | G0:0044237 | 0.0357 |
| s1r0208 | G0:0052188 | <1e-4 | s110443 | G0:0050896 | <1e-4 | s1r0575 | G0:0022891 | <1e-4 | s110944 | G0:0005575 | <1e-4 | s1r0601 | G0:0044237 | 0.0357 |
| s111390 | G0:0016054 | <1e-4 | s1r0157 | G0:0009059 | <1e-4 | s1r0142 | G0:0015075 | <1e-4 | s1r0625 | G0:0044425 | <1e-4 | s111477 | G0:0004871 | 0.0357 |
| s111613 | G0:0071840 | <1e-4 | s1r1648 | G0:0051188 | <1e-4 | s111714 | G0:0015291 | <1e-4 | ssr1951 | G0:0044422 | <1e-4 | s110446 | G0:0004871 | 0.0357 |
| ssr1768 | G0:0019751 | <1e-4 | s1r1117 | G0:0006766 | <1e-4 | s1r1568 | G0:0022857 | <1e-4 | s1r0930 | G0:0044425 | <1e-4 | s1r0642 | G0:0004871 | 0.0357 |
| s111632 | G0:0006163 | <1e-4 | s111455 | G0:0051347 | <1e-4 | s110888 | G0:0043167 | <1e-4 | s1r0273 | G0:0005575 | <1e-4 | s111528 | G0:0004871 | 0.0357 |
| s111735 | G0:0016053 | <1e-4 | s111586 | G0:0022411 | <1e-4 | ss16061 | G0:0016818 | <1e-4 | s110096 | G0:0005575 | <1e-4 | ssr0692 | G0:0004871 | 0.0357 |
| s1r0588 | G0:0009991 | <1e-4 | s1r1127 | G0:0009132 | <1e-4 | s1r0355 | G0:0015291 | <1e-4 | ssr0692 | G0:0044444 | <1e-4 | s1r0147 | G0:0004871 | 0.0357 |
| s111606 | G0:0031326 | <1e-4 | s111390 | G0:0046128 | <1e-4 | ssr3129 | G0:0008171 | <1e-4 | s1r0773 | G0:0005575 | <1e-4 | s111913 | G0:0005975 | 0.034  |
| ssr6078 | G0:0009165 | <1e-4 | s1r1913 | G0:0048878 | <1e-4 | s111658 | G0:0015405 | <1e-4 | s110564 | G0:0044424 | <1e-4 | s1r0476 | G0:0005975 | 0.034  |
| ss11046 | G0:0016054 | <1e-4 | s111388 | G0:0050801 | <1e-4 | s111925 | G0:0022803 | <1e-4 | s1r6028 | G0:0044444 | <1e-4 | s111671 | G0:0005975 | 0.034  |
| s110168 | G0:0006082 | <1e-4 | s1r0821 | G0:0048523 | <1e-4 | s111651 | G0:0015291 | <1e-4 | s1r1407 | G0:0044446 | <1e-4 | s111426 | G0:0005975 | 0.034  |
| s1r0670 | G0:0072522 | <1e-4 | s1r1062 | G0:0046394 | <1e-4 | s1r1807 | G0:0022890 | <1e-4 | s1r0305 | G0:0044424 | <1e-4 | s110864 | G0:0005975 | 0.034  |
| s1r0806 | G0:0016053 | <1e-4 | s1r0581 | G0:0009141 | <1e-4 | s1r0552 | G0:0015075 | <1e-4 | s1r1814 | G0:0044424 | <1e-4 | s1r0852 | G0:0005975 | 0.034  |
| s111611 | G0:0071840 | <1e-4 | s1r1484 | G0:0019751 | <1e-4 | s1r0702 | G0:0015077 | <1e-4 | s1r0104 | G0:0005575 | <1e-4 | s111219 | G0:0005975 | 0.034  |
| s1r0455 | G0:0008610 | <1e-4 | ss12065 | G0:0009117 | <1e-4 | s111378 | G0:0042623 | <1e-4 | s1r2071 | G0:0044446 | <1e-4 | s1r0304 | G0:0005975 | 0.034  |
| s110524 | G0:0046483 | <1e-4 | ssr6003 | G0:0048522 | <1e-4 | s111191 | G0:0016741 | <1e-4 | s111086 | G0:0044444 | <1e-4 | s1r1391 | G0:0005975 | 0.034  |
| s1r0208 | G0:0008150 | <1e-4 | s110661 | G0:0008150 | <1e-4 | s1r1084 | G0:0015399 | <1e-4 | s110854 | G0:0044424 | <1e-4 | s1r1612 | G0:0005975 | 0.034  |
| ssr1114 | G0:0055114 | <1e-4 | s1r2010 | G0:0045184 | <1e-4 | s1r6049 | G0:0022832 | <1e-4 | s117069 | G0:0044446 | <1e-4 | s1r1025 | G0:0005975 | 0.034  |
| s111934 | G0:0034660 | <1e-4 | s110047 | G0:0009123 | <1e-4 | s111201 | G0:0060089 | <1e-4 | s111634 | G0:0044422 | <1e-4 | s1r0871 | G0:0005975 | 0.034  |
| s1r6049 | G0:0009126 | <1e-4 | s110661 | G0:0009199 | <1e-4 | s110615 | G0:0022892 | <1e-4 | s1r1571 | G0:0044425 | <1e-4 | s110296 | G0:0005975 | 0.034  |
| s1r1611 | G0:0034654 | <1e-4 | ssr5019 | G0:0055082 | <1e-4 | s111766 | G0:0022832 | <1e-4 | s1r1762 | G0:0044425 | <1e-4 | s111455 | G0:0005975 | 0.034  |
| s1r1657 | G0:0048518 | <1e-4 | s1r6088 | G0:0043436 | <1e-4 | s1r2010 | G0:0016818 | <1e-4 | s111938 | G0:0043226 | <1e-4 | s110096 | G0:0005975 | 0.034  |
| ssr2201 | G0:0019219 | <1e-4 | s1r1098 | G0:0019751 | <1e-4 | s110553 | G0:0015291 | <1e-4 | s1r1425 | G0:0044422 | <1e-4 | s1r0211 | G0:0005975 | 0.034  |
| s1r2010 | G0:0006066 | <1e-4 | s111372 | G0:0045184 | <1e-4 | s1r0587 | G0:0016746 | <1e-4 | s1r1339 | G0:0005575 | <1e-4 | s110283 | G0:0005975 | 0.034  |
| s110360 | G0:0051818 | <1e-4 | s115046 | G0:0009142 | <1e-4 | s1r0967 | G0:0042623 | <1e-4 | s110832 | G0:0044424 | <1e-4 | s1r1674 | G0:0005975 | 0.034  |
| s1r2004 | G0:0006163 | <1e-4 | s111611 | G0:0019222 | <1e-4 | s110997 | G0:0015291 | <1e-4 | s1r1056 | G0:0044422 | <1e-4 | s111586 | G0:0005975 | 0.034  |
| s1r1110 | G0:0009117 | <1e-4 | ssr0761 | G0:0071842 | <1e-4 | ss17038 | G0:0022890 | <1e-4 | ss15027 | G0:0043226 | <1e-4 | s110854 | G0:0005975 | 0.034  |
| s1r1600 | G0:0005996 | <1e-4 | s1r1047 | G0:0019219 | <1e-4 | s111251 | G0:0022857 | <1e-4 | s1r1270 | G0:0044422 | <1e-4 | s110508 | G0:0005975 | 0.034  |
| s1r1819 | G0:0031326 | <1e-4 | s1r7059 | G0:0044248 | <1e-4 | s1r0199 | G0:0043167 | <1e-4 | s1r6068 | G0:0005575 | <1e-4 | s110360 | G0:0005975 | 0.034  |
| s1r1923 | G0:0071554 | <1e-4 | ss12717 | G0:0008150 | <1e-4 | s110237 | G0:0022803 | <1e-4 | s1r1762 | G0:0005575 | <1e-4 | s1r1533 | G0:0005975 | 0.034  |
| ssr6089 | G0:0008150 | <1e-4 | s111504 | G0:0046164 | <1e-4 | ssr2201 | G0:0005342 | <1e-4 | ss15098 | G0:0044464 | <1e-4 | s1r1519 | G0:0005975 | 0.034  |
| s111315 | G0:0009893 | <1e-4 | s1r1066 | G0:0009308 | <1e-4 | ssr1375 | G0:0022838 | <1e-4 | ssr6089 | G0:0044425 | <1e-4 | s1r1752 | G0:0003723 | 0.0339 |
| s1r0702 | G0:0044255 | <1e-4 | s110160 | G0:0072522 | <1e-4 | s1r2110 | G0:0022857 | <1e-4 | s110008 | G0:0044464 | <1e-4 | s1r0865 | G0:0003723 | 0.0339 |
| s110871 | G0:0051171 | <1e-4 | s111658 | G0:0048878 | <1e-4 | s1r1557 | G0:0022803 | <1e-4 | s111640 | G0:0044425 | <1e-4 | s1r7091 | G0:0003723 | 0.0339 |
| s111252 | G0:0005996 | <1e-4 | ssr5092 | G0:0065007 | <1e-4 | s110775 | G0:0022832 | <1e-4 | s110749 | G0:0043226 | <1e-4 | s110249 | G0:0003723 | 0.0339 |
| s1r0509 | G0:0044255 | <1e-4 | s1r1327 | G0:0046128 | <1e-4 | s111092 | G0:0016462 | <1e-4 | s1r1886 | G0:0044424 | <1e-4 | ss17022 | G0:0003723 | 0.0339 |
| ssr2422 | G0:0009893 | <1e-4 | s1r1196 | G0:0009165 | <1e-4 | s1r1812 | G0:0015077 | <1e-4 | s1r0181 | G0:0005575 | <1e-4 | s111373 | G0:0003723 | 0.0339 |
| s110335 | G0:0046164 | <1e-4 | s110854 | G0:0052111 | <1e-4 | ss15065 | G0:0015405 | <1e-4 | s111049 | G0:0044464 | <1e-4 | ssr0336 | G0:0003723 | 0.0339 |
| s1r1951 | G0:0051179 | <1e-4 | ss15103 | G0:0009057 | <1e-4 | s110539 | G0:0005342 | <1e-4 | ss10410 | G0:0044464 | <1e-4 | s1r0241 | G0:0003723 | 0.0339 |
| s111068 | G0:0055114 | <1e-4 | s117062 | G0:0072527 | <1e-4 | ssr2754 | G0:0022803 | <1e-4 | sg10001 | G0:0044444 | <1e-4 | s115030 | G0:0003723 | 0.0339 |
| s111106 | G0:0051246 | <1e-4 | s1r1276 | G0:0055082 | <1e-4 | s1r0967 | G0:0060089 | <1e-4 | s1r7098 | G0:0044422 | <1e-4 | ss17039 | G0:0003723 | 0.0339 |
| s1r5127 | G0:0010556 | <1e-4 | s110553 | G0:0009889 | <1e-4 | s110350 | G0:0015405 | <1e-4 | s1r0373 | G0:0005575 | <1e-4 | s1r1290 | G0:0003723 | 0.0339 |

|         |            |       |         |            |       |         |            |       |         |            |       |         |            |        |
|---------|------------|-------|---------|------------|-------|---------|------------|-------|---------|------------|-------|---------|------------|--------|
| slr5087 | G0:0009260 | <1e-4 | sl10595 | G0:0019751 | <1e-4 | sl11163 | G0:0016462 | <1e-4 | sl10384 | G0:0044446 | <1e-4 | slr2027 | G0:0003723 | 0.0339 |
| sl11240 | G0:0071496 | <1e-4 | slr1917 | G0:0034641 | <1e-4 | ssr1766 | G0:0043167 | <1e-4 | sl10487 | G0:0043226 | <1e-4 | sl11131 | G0:0003723 | 0.0339 |
| sl10096 | G0:0048519 | <1e-4 | slr0801 | G0:0071840 | <1e-4 | sl11006 | G0:0022836 | <1e-4 | slr6033 | G0:0044425 | <1e-4 | sl18019 | G0:0003723 | 0.0339 |
| slr0262 | G0:0009132 | <1e-4 | sl10444 | G0:0008150 | <1e-4 | slr0269 | G0:0022836 | <1e-4 | ss10350 | G0:0005575 | <1e-4 | sl10858 | G0:0003723 | 0.0339 |
| sl10176 | G0:0009059 | <1e-4 | sl10804 | G0:0046394 | <1e-4 | slr5024 | G0:0043492 | <1e-4 | sl10249 | G0:0044424 | <1e-4 | sl17033 | G0:0003723 | 0.0339 |
| slr6067 | G0:0048522 | <1e-4 | sl10160 | G0:0009057 | <1e-4 | slr0876 | G0:0015267 | <1e-4 | sl10237 | G0:0044444 | <1e-4 | ssr3402 | G0:0003723 | 0.0339 |
| slr1288 | G0:0006766 | <1e-4 | sl10181 | G0:0051179 | <1e-4 | slr1619 | G0:0022838 | <1e-4 | sl11265 | G0:0005575 | <1e-4 | sl10625 | G0:0003723 | 0.0339 |
| sl10102 | G0:0046128 | <1e-4 | sl11698 | G0:0071554 | <1e-4 | sl15090 | G0:0015293 | <1e-4 | slr0909 | G0:0044464 | <1e-4 | slr5073 | G0:0003723 | 0.0339 |
| sl10162 | G0:0046394 | <1e-4 | ss13549 | G0:0044003 | <1e-4 | sl10160 | G0:0003674 | <1e-4 | slr0169 | G0:0044422 | <1e-4 | slr1681 | G0:0003723 | 0.0339 |
| ssr3154 | G0:0009132 | <1e-4 | sl17047 | G0:0006732 | <1e-4 | sl10995 | G0:0015077 | <1e-4 | slr0082 | G0:0044425 | <1e-4 | slr6091 | G0:0003723 | 0.0339 |
| sl10473 | G0:0009987 | <1e-4 | slr1537 | G0:0048522 | <1e-4 | slr1702 | G0:0015405 | <1e-4 | slr5116 | G0:0044422 | <1e-4 | sl10691 | G0:0003723 | 0.0339 |
| sl11751 | G0:0034654 | <1e-4 | slr1958 | G0:0009142 | <1e-4 | sl10242 | G0:0004872 | <1e-4 | sl11913 | G0:0044424 | <1e-4 | sl11052 | G0:0003723 | 0.0339 |
| slr1886 | G0:0006091 | <1e-4 | slr0863 | G0:0044106 | <1e-4 | sl11630 | G0:0016462 | <1e-4 | slr0787 | G0:0005575 | <1e-4 | sl10696 | G0:0003723 | 0.0339 |
| ssr6083 | G0:0016053 | <1e-4 | slr1570 | G0:0009892 | <1e-4 | sl10925 | G0:0060089 | <1e-4 | slr0613 | G0:0005575 | <1e-4 | sl10172 | G0:0003723 | 0.0339 |
| slr1618 | G0:0009124 | <1e-4 | slr1614 | G0:0051186 | <1e-4 | slr0937 | G0:0016462 | <1e-4 | ss17038 | G0:0005575 | <1e-4 | sl11289 | G0:0003723 | 0.0339 |
| sl11571 | G0:0080090 | <1e-4 | slr1074 | G0:0051716 | <1e-4 | sl11380 | G0:0022891 | <1e-4 | slr0487 | G0:0005575 | <1e-4 | slr0300 | G0:0003723 | 0.0339 |
| slr1667 | G0:0009132 | <1e-4 | sl10238 | G0:0090304 | <1e-4 | slr0516 | G0:0016817 | <1e-4 | slr0692 | G0:0044425 | <1e-4 | slr1627 | G0:0003723 | 0.0339 |
| slr1178 | G0:0009260 | <1e-4 | slr1721 | G0:0022607 | <1e-4 | slr1288 | G0:0015291 | <1e-4 | slr2049 | G0:0044424 | <1e-4 | slr6088 | G0:0003723 | 0.0339 |
| slr0581 | G0:0031323 | <1e-4 | slr1188 | G0:0010556 | <1e-4 | sl11192 | G0:0022857 | <1e-4 | slr1613 | G0:0044464 | <1e-4 | slr0755 | G0:0003723 | 0.0339 |
| ssr3570 | G0:0034641 | <1e-4 | ss10787 | G0:0006220 | <1e-4 | sl10085 | G0:0015075 | <1e-4 | ssr2333 | G0:0044425 | <1e-4 | sl11476 | G0:0003723 | 0.0339 |
| slr0708 | G0:0034641 | <1e-4 | sl11766 | G0:0006720 | <1e-4 | sl11735 | G0:0008171 | <1e-4 | slr0740 | G0:0044422 | <1e-4 | sl18011 | G0:0003723 | 0.0339 |
| slr2000 | G0:0009057 | <1e-4 | slr0111 | G0:0051234 | <1e-4 | sl10327 | G0:0022836 | <1e-4 | ss12807 | G0:0044444 | <1e-4 | ssr1155 | G0:0003723 | 0.0339 |
| ssr3532 | G0:0045184 | <1e-4 | slr0888 | G0:0016053 | <1e-4 | slr2052 | G0:0060089 | <1e-4 | slr1614 | G0:0044464 | <1e-4 | slr2004 | G0:0003723 | 0.0339 |
| sl11390 | G0:0043933 | <1e-4 | slr1398 | G0:0046394 | <1e-4 | sl11262 | G0:0016462 | <1e-4 | slr0596 | G0:0044425 | <1e-4 | ss15114 | G0:0003723 | 0.0339 |
| ssr5106 | G0:0009165 | <1e-4 | slr0364 | G0:0006091 | <1e-4 | sl10867 | G0:0015399 | <1e-4 | sl11527 | G0:0043226 | <1e-4 | slr7060 | G0:0003723 | 0.0339 |
| sl10069 | G0:0022411 | <1e-4 | ss12065 | G0:0022607 | <1e-4 | slr5126 | G0:0016818 | <1e-4 | sl11693 | G0:0044422 | <1e-4 | slr6106 | G0:0003723 | 0.0339 |
| sl11938 | G0:0006066 | <1e-4 | sl17033 | G0:0010468 | <1e-4 | sl10756 | G0:0043167 | <1e-4 | sl11006 | G0:0044422 | <1e-4 | ss17045 | G0:0003723 | 0.0339 |
| sl10048 | G0:0019751 | <1e-4 | slr0489 | G0:0046394 | <1e-4 | slr0184 | G0:0003674 | <1e-4 | slr1183 | G0:0044424 | <1e-4 | slr7099 | G0:0003723 | 0.0339 |
| slr1619 | G0:0044283 | <1e-4 | sl11913 | G0:0080090 | <1e-4 | slr0498 | G0:0022832 | <1e-4 | sl11696 | G0:0044446 | <1e-4 | sl18027 | G0:0003723 | 0.0339 |
| slr0935 | G0:0018130 | <1e-4 | slr0941 | G0:0043436 | <1e-4 | slr1230 | G0:0003674 | <1e-4 | sl15033 | G0:0044446 | <1e-4 | slr2070 | G0:0003723 | 0.0339 |
| slr1196 | G0:0071841 | <1e-4 | sl10847 | G0:0008610 | <1e-4 | sl10010 | G0:0022803 | <1e-4 | sl11915 | G0:0005575 | <1e-4 | slr0656 | G0:0003723 | 0.0339 |
| slr1053 | G0:0051716 | <1e-4 | slr0852 | G0:0044271 | <1e-4 | sl11863 | G0:0015399 | <1e-4 | slr1203 | G0:0044444 | <1e-4 | slr1406 | G0:0003723 | 0.0339 |
| slr0196 | G0:0009309 | <1e-4 | slr8014 | G0:0001932 | <1e-4 | ss13451 | G0:0016746 | <1e-4 | slr1537 | G0:0044444 | <1e-4 | sl11832 | G0:0003723 | 0.0339 |
| sl10861 | G0:0051246 | <1e-4 | sl10553 | G0:0072528 | <1e-4 | slr1365 | G0:0016818 | <1e-4 | sl10508 | G0:0005575 | <1e-4 | slr2110 | G0:0003723 | 0.0339 |
| sl10354 | G0:0016052 | <1e-4 | sl11563 | G0:0044271 | <1e-4 | sl10216 | G0:0015405 | <1e-4 | sl10048 | G0:0044444 | <1e-4 | slr6028 | G0:0003723 | 0.0339 |
| ssr2711 | G0:0019752 | <1e-4 | sl16052 | G0:0019752 | <1e-4 | sl10189 | G0:0022892 | <1e-4 | sl11348 | G0:0044425 | <1e-4 | ssr2802 | G0:0003723 | 0.0339 |
| slr1907 | G0:0071496 | <1e-4 | slr7094 | G0:0009124 | <1e-4 | sl10177 | G0:0016741 | <1e-4 | ssr3570 | G0:0044464 | <1e-4 | sl10405 | G0:0003723 | 0.0339 |
| slr1413 | G0:0071842 | <1e-4 | sl11939 | G0:0019362 | <1e-4 | sl11250 | G0:0022838 | <1e-4 | slr6075 | G0:0005575 | <1e-4 | slr0217 | G0:0003723 | 0.0339 |
| slr0625 | G0:0006720 | <1e-4 | sl11025 | G0:0009124 | <1e-4 | slr1809 | G0:0005342 | <1e-4 | sl11722 | G0:0043226 | <1e-4 | slr0976 | G0:0003723 | 0.0339 |
| slr0655 | G0:0008150 | <1e-4 | sl11751 | G0:0019751 | <1e-4 | ss15113 | G0:0015077 | <1e-4 | sl11062 | G0:0044464 | <1e-4 | ss17038 | G0:0003723 | 0.0339 |
| slr1235 | G0:0042455 | <1e-4 | sl10293 | G0:0009117 | <1e-4 | sl11949 | G0:0016746 | <1e-4 | slr1397 | G0:0005575 | <1e-4 | sl17050 | G0:0003723 | 0.0339 |
| ssr5020 | G0:0009893 | <1e-4 | ssr6003 | G0:0051818 | <1e-4 | slr1576 | G0:0022892 | <1e-4 | slr0519 | G0:0044422 | <1e-4 | slr0013 | G0:0003723 | 0.0339 |
| sl15132 | G0:0016053 | <1e-4 | ssr1391 | G0:0044248 | <1e-4 | sl10787 | G0:0022836 | <1e-4 | sl10381 | G0:0043226 | <1e-4 | sl11380 | G0:0003723 | 0.0339 |
| slr1110 | G0:0071496 | <1e-4 | sl10982 | G0:0006793 | <1e-4 | sl11638 | G0:0016746 | <1e-4 | slr1150 | G0:0044464 | <1e-4 | ss17007 | G0:0003723 | 0.0339 |
| sl10382 | G0:0050789 | <1e-4 | sl11131 | G0:0043549 | <1e-4 | slr0376 | G0:0022803 | <1e-4 | slr0594 | G0:0044446 | <1e-4 | sl16052 | G0:0003723 | 0.0339 |
| sl11469 | G0:0043933 | <1e-4 | sl10563 | G0:0019637 | <1e-4 | ssr1768 | G0:0022892 | <1e-4 | slr0317 | G0:0044424 | <1e-4 | slr1079 | G0:0003723 | 0.0339 |
| ssr6048 | G0:0044260 | <1e-4 | ssr7084 | G0:0006066 | <1e-4 | sl11063 | G0:0016746 | <1e-4 | slr7013 | G0:0044444 | <1e-4 | slr0313 | G0:0003723 | 0.0339 |
| slr1103 | G0:0042451 | <1e-4 | slr0810 | G0:0006811 | <1e-4 | ss18003 | G0:0022892 | <1e-4 | slr0208 | G0:0044422 | <1e-4 | sl10552 | G0:0003723 | 0.0339 |
| sl10360 | G0:0051171 | <1e-4 | ssr8047 | G0:0006576 | <1e-4 | sl10525 | G0:0015399 | <1e-4 | slr1648 | G0:0044422 | <1e-4 | slr0914 | G0:0003723 | 0.0339 |
| sl10071 | G0:0009394 | <1e-4 | ss11417 | G0:0009892 | <1e-4 | slr1863 | G0:0022890 | <1e-4 | sl11247 | G0:0044422 | <1e-4 | slr5024 | G0:0003723 | 0.0339 |
| sl18035 | G0:0022411 | <1e-4 | sl11634 | G0:0019222 | <1e-4 | slr0263 | G0:0015075 | <1e-4 | sl15034 | G0:0044422 | <1e-4 | slr1737 | G0:0003723 | 0.0339 |
| ssr2962 | G0:0009117 | <1e-4 | ss12420 | G0:0006793 | <1e-4 | sl10802 | G0:0016818 | <1e-4 | sl11583 | G0:0044424 | <1e-4 | sl18040 | G0:0003723 | 0.0339 |
| sl11785 | G0:0009892 | <1e-4 | slr1572 | G0:0072521 | <1e-4 | ssr1258 | G0:0022803 | <1e-4 | slr1223 | G0:0044444 | <1e-4 | slr6051 | G0:0003723 | 0.0339 |
| sl10872 | G0:0010556 | <1e-4 | slr1624 | G0:0009059 | <1e-4 | slr6074 | G0:0016462 | <1e-4 | slr0393 | G0:0044424 | <1e-4 | sl10565 | G0:0003723 | 0.0339 |

|         |            |       |         |            |       |         |            |       |         |            |       |          |            |        |
|---------|------------|-------|---------|------------|-------|---------|------------|-------|---------|------------|-------|----------|------------|--------|
| ss18003 | G0:0050794 | <1e-4 | slr6074 | G0:0009142 | <1e-4 | slr1437 | G0:0043167 | <1e-4 | slr0168 | G0:0044422 | <1e-4 | sl11652  | G0:0003723 | 0.0339 |
| slr1052 | G0:0009889 | <1e-4 | sl11201 | G0:0006811 | <1e-4 | slr6075 | G0:0015293 | <1e-4 | slr2103 | G0:0044446 | <1e-4 | slr2060  | G0:0003723 | 0.0339 |
| slr1290 | G0:0042180 | <1e-4 | ssl1377 | G0:0051171 | <1e-4 | sl10597 | G0:0003674 | <1e-4 | sl10923 | G0:0044424 | <1e-4 | slr0106  | G0:0003723 | 0.0339 |
| ssl1383 | G0:0006091 | <1e-4 | slr1128 | G0:0044003 | <1e-4 | slr1923 | G0:0015291 | <1e-4 | slr0590 | G0:0044464 | <1e-4 | slr1875  | G0:0003723 | 0.0339 |
| slr0871 | G0:0031640 | <1e-4 | slr0476 | G0:0019219 | <1e-4 | slr1927 | G0:0015399 | <1e-4 | sl10786 | G0:0005575 | <1e-4 | ss17074  | G0:0003723 | 0.0339 |
| slr1505 | G0:0043170 | <1e-4 | slr0976 | G0:0031326 | <1e-4 | slr1203 | G0:0022803 | <1e-4 | sl11461 | G0:0044424 | <1e-4 | slr5053  | G0:0003723 | 0.0339 |
| slr1384 | G0:0006163 | <1e-4 | slr1047 | G0:0006721 | <1e-4 | ssr1768 | G0:0060089 | <1e-4 | slr0144 | G0:0044444 | <1e-4 | slr6087  | G0:0003723 | 0.0339 |
| sl10062 | G0:0034660 | <1e-4 | ssl3549 | G0:0009262 | <1e-4 | slr0397 | G0:0022891 | <1e-4 | ssr6046 | G0:0044422 | <1e-4 | ssl1263  | G0:0003723 | 0.0339 |
| slr1104 | G0:0048522 | <1e-4 | slr6021 | G0:0009142 | <1e-4 | slr0326 | G0:0015399 | <1e-4 | slr0514 | G0:0044464 | <1e-4 | slr0863  | G0:0003723 | 0.0339 |
| slr7026 | G0:0042180 | <1e-4 | sl18033 | G0:0048523 | <1e-4 | slr0725 | G0:0022892 | <1e-4 | slr0142 | G0:0044425 | <1e-4 | slr0575  | G0:0003723 | 0.0339 |
| sl11164 | G0:0033013 | <1e-4 | slr0058 | G0:0009142 | <1e-4 | slr1436 | G0:0022890 | <1e-4 | slr1417 | G0:0044446 | <1e-4 | slr1163  | G0:0003723 | 0.0339 |
| sl10397 | G0:0001932 | <1e-4 | sl10641 | G0:0016054 | <1e-4 | sl10268 | G0:0022832 | <1e-4 | sl11469 | G0:0044446 | <1e-4 | slr1101  | G0:0003723 | 0.0339 |
| slr0519 | G0:0060255 | <1e-4 | sl10189 | G0:0034641 | <1e-4 | sl10994 | G0:0015293 | <1e-4 | sl15030 | G0:0044425 | <1e-4 | slr7102  | G0:0003723 | 0.0339 |
| sl10103 | G0:0048522 | <1e-4 | sl10397 | G0:0051171 | <1e-4 | ssl1972 | G0:0015293 | <1e-4 | sl10910 | G0:0044444 | <1e-4 | slr6022  | G0:0003723 | 0.0339 |
| sl11265 | G0:0080090 | <1e-4 | ssr7079 | G0:0009144 | <1e-4 | slr0364 | G0:0043167 | <1e-4 | ssl7039 | G0:0044446 | <1e-4 | sl10736  | G0:0003723 | 0.0339 |
| slr0552 | G0:0043436 | <1e-4 | slr0517 | G0:0009144 | <1e-4 | sl11191 | G0:0005342 | <1e-4 | slr0581 | G0:0005575 | <1e-4 | ssr2972  | G0:0003723 | 0.0339 |
| slr1407 | G0:0009991 | <1e-4 | sl11835 | G0:0016053 | <1e-4 | sl10060 | G0:0043167 | <1e-4 | ssl7042 | G0:0044425 | <1e-4 | ssr7084  | G0:0003723 | 0.0339 |
| slr0273 | G0:0009141 | <1e-4 | sl11586 | G0:0009987 | <1e-4 | slr0784 | G0:0008171 | <1e-4 | ssr1375 | G0:0005575 | <1e-4 | ssr6024  | G0:0003723 | 0.0339 |
| slr1495 | G0:0009056 | <1e-4 | ssl7007 | G0:0006793 | <1e-4 | sl10419 | G0:0015075 | <1e-4 | ssl1377 | G0:0044446 | <1e-4 | sl11882  | G0:0003723 | 0.0339 |
| sl10361 | G0:0009262 | <1e-4 | ssr2962 | G0:0019751 | <1e-4 | ssr1499 | G0:0016462 | <1e-4 | sl10022 | G0:0044422 | <1e-4 | sl10442  | G0:0003723 | 0.0339 |
| sl11965 | G0:0019222 | <1e-4 | sl10183 | G0:0009132 | <1e-4 | sl10096 | G0:0015075 | <1e-4 | sl11946 | G0:0044425 | <1e-4 | slr0730  | G0:0003723 | 0.0339 |
| sl11389 | G0:0009987 | <1e-4 | slr1956 | G0:0005996 | <1e-4 | sl11414 | G0:0022890 | <1e-4 | ssl2781 | G0:0044444 | <1e-4 | slr0291  | G0:0003723 | 0.0339 |
| sl11863 | G0:0045184 | <1e-4 | slr1441 | G0:0034660 | <1e-4 | sl10360 | G0:0015267 | <1e-4 | slr0146 | G0:0044464 | <1e-4 | ssr6083  | G0:0003723 | 0.0339 |
| sl11737 | G0:0034654 | <1e-4 | sl11573 | G0:0048522 | <1e-4 | sl10071 | G0:0008171 | <1e-4 | sl11940 | G0:0005575 | <1e-4 | slr1513  | G0:0003723 | 0.0339 |
| sl10614 | G0:0072528 | <1e-4 | slr0912 | G0:0016054 | <1e-4 | ssr5092 | G0:0022838 | <1e-4 | slr7025 | G0:0005575 | <1e-4 | slr6068  | G0:0003723 | 0.0339 |
| slr0479 | G0:0009259 | <1e-4 | slr0145 | G0:0019222 | <1e-4 | slr1187 | G0:0015293 | <1e-4 | sl10985 | G0:0044464 | <1e-4 | slr0670  | G0:0003723 | 0.0339 |
| slr1880 | G0:0009141 | <1e-4 | sl11191 | G0:0044248 | <1e-4 | slr1053 | G0:0016746 | <1e-4 | ssl6092 | G0:0044425 | <1e-4 | sl10298  | G0:0003723 | 0.0339 |
| ssl1464 | G0:0044283 | <1e-4 | sl12013 | G0:0009165 | <1e-4 | slr1052 | G0:0022857 | <1e-4 | slr0388 | G0:0044464 | <1e-4 | slr1507  | G0:0003723 | 0.0339 |
| sl10630 | G0:0009260 | <1e-4 | sl11717 | G0:0044255 | <1e-4 | slr0554 | G0:0015077 | <1e-4 | slr0366 | G0:0044444 | <1e-4 | sl10905  | G0:0003723 | 0.0339 |
| slr6047 | G0:0009144 | <1e-4 | sl11912 | G0:0006811 | <1e-4 | sl12013 | G0:0043492 | <1e-4 | ssr6003 | G0:0044424 | <1e-4 | slr0885  | G0:0003723 | 0.0339 |
| sl10479 | G0:0043436 | <1e-4 | sl11652 | G0:0006220 | <1e-4 | ssl7021 | G0:0015405 | <1e-4 | sl11160 | G0:0044425 | <1e-4 | slr1780  | G0:0003723 | 0.0339 |
| slr7016 | G0:0071842 | <1e-4 | sl10710 | G0:0008610 | <1e-4 | slr1450 | G0:0022836 | <1e-4 | slr0731 | G0:0005575 | <1e-4 | sl11036  | G0:0003723 | 0.0339 |
| sl11166 | G0:0044275 | <1e-4 | slr1168 | G0:0051716 | <1e-4 | ssl6061 | G0:0042623 | <1e-4 | sl11902 | G0:0044464 | <1e-4 | sl117087 | G0:0003723 | 0.0339 |
| slr0981 | G0:0051716 | <1e-4 | sl18004 | G0:0046128 | <1e-4 | sl11526 | G0:0022832 | <1e-4 | slr1241 | G0:0044424 | <1e-4 | ssl6061  | G0:0003723 | 0.0339 |
| ssr2998 | G0:0043549 | <1e-4 | slr0670 | G0:0090304 | <1e-4 | sl10678 | G0:0043492 | <1e-4 | slr1940 | G0:0044425 | <1e-4 | slr1438  | G0:0003723 | 0.0339 |
| slr1571 | G0:0055114 | <1e-4 | slr1513 | G0:0031326 | <1e-4 | slr1266 | G0:0015399 | <1e-4 | ssr2049 | G0:0044422 | <1e-4 | slr0728  | G0:0003723 | 0.0339 |
| slr1241 | G0:0009987 | <1e-4 | slr6015 | G0:0072522 | <1e-4 | slr1847 | G0:0022890 | <1e-4 | ssr6048 | G0:0044446 | <1e-4 | sl10765  | G0:0003723 | 0.0339 |
| slr1866 | G0:0009308 | <1e-4 | slr1056 | G0:0050801 | <1e-4 | slr6006 | G0:0022838 | <1e-4 | slr1900 | G0:0044446 | <1e-4 | sl10327  | G0:0003723 | 0.0339 |
| sl10449 | G0:0051818 | <1e-4 | sl10301 | G0:0010556 | <1e-4 | sl10810 | G0:0005342 | <1e-4 | slr0588 | G0:0044424 | <1e-4 | sl117006 | G0:0003723 | 0.0339 |
| slr1188 | G0:0046907 | <1e-4 | slr0168 | G0:0009141 | <1e-4 | slr0869 | G0:0042623 | <1e-4 | sl10328 | G0:0044422 | <1e-4 | ssr5011  | G0:0003723 | 0.0339 |
| sl15032 | G0:0006733 | <1e-4 | slr1568 | G0:0034654 | <1e-4 | sl11634 | G0:0015405 | <1e-4 | slr0780 | G0:0044446 | <1e-4 | sl10157  | G0:0003723 | 0.0339 |
| sl16055 | G0:0006576 | <1e-4 | slr0729 | G0:0044283 | <1e-4 | slr0664 | G0:0022836 | <1e-4 | slr1566 | G0:0044422 | <1e-4 | slr5013  | G0:0003723 | 0.0339 |
| slr0581 | G0:0009056 | <1e-4 | ssl1377 | G0:0071496 | <1e-4 | slr1362 | G0:0015075 | <1e-4 | slr1023 | G0:0044444 | <1e-4 | slr7057  | G0:0003723 | 0.0339 |
| slr0362 | G0:0016054 | <1e-4 | sl11062 | G0:0044106 | <1e-4 | sl10069 | G0:0015075 | <1e-4 | slr7095 | G0:0044444 | <1e-4 | slr6044  | G0:0003723 | 0.0339 |
| slr0482 | G0:0042455 | <1e-4 | sl11757 | G0:0043549 | <1e-4 | slr0821 | G0:0015077 | <1e-4 | slr0151 | G0:0044444 | <1e-4 | ssr5106  | G0:0003723 | 0.0339 |
| slr0625 | G0:0050789 | <1e-4 | sl11609 | G0:0016054 | <1e-4 | sl11192 | G0:0016462 | <1e-4 | sl11634 | G0:0043226 | <1e-4 | slr0326  | G0:0003723 | 0.0339 |
| slr0514 | G0:0019752 | <1e-4 | sl11530 | G0:0006766 | <1e-4 | slr0482 | G0:0016746 | <1e-4 | sl11784 | G0:0044446 | <1e-4 | slr1396  | G0:0003723 | 0.0339 |
| sl17089 | G0:0009892 | <1e-4 | sgl0001 | G0:0050789 | <1e-4 | sl11132 | G0:0015077 | <1e-4 | sl11934 | G0:0044422 | <1e-4 | sl117086 | G0:0003723 | 0.0339 |
| slr7091 | G0:0010468 | <1e-4 | slr1066 | G0:0006811 | <1e-4 | ssr1473 | G0:0022892 | <1e-4 | sl11319 | G0:0043226 | <1e-4 | slr2071  | G0:0003723 | 0.0339 |
| sl10547 | G0:0006631 | <1e-4 | sl10488 | G0:0044271 | <1e-4 | slr0038 | G0:0042623 | <1e-4 | slr0392 | G0:0044424 | <1e-4 | slr0269  | G0:0003723 | 0.0339 |
| sl11606 | G0:0072522 | <1e-4 | slr0909 | G0:0051818 | <1e-4 | sl11219 | G0:0043492 | <1e-4 | ssr5092 | G0:0044425 | <1e-4 | ssl1378  | G0:0003723 | 0.0339 |
| ssr2067 | G0:0044106 | <1e-4 | sl17066 | G0:0019222 | <1e-4 | sl11582 | G0:0022890 | <1e-4 | slr1813 | G0:0044446 | <1e-4 | slr0651  | G0:0003723 | 0.0339 |
| slr5013 | G0:0022607 | <1e-4 | ssr6089 | G0:0009309 | <1e-4 | ssr6032 | G0:0016462 | <1e-4 | sl17050 | G0:0044422 | <1e-4 | sl11424  | G0:0005515 | 0.0334 |
| slr0553 | G0:0050896 | <1e-4 | slr1209 | G0:0052111 | <1e-4 | slr0654 | G0:0043167 | <1e-4 | sl10268 | G0:0044422 | <1e-4 | slr1032  | G0:0005515 | 0.0334 |

|          |            |       |          |            |       |          |            |       |          |            |       |          |            |        |
|----------|------------|-------|----------|------------|-------|----------|------------|-------|----------|------------|-------|----------|------------|--------|
| ssl1792  | G0:0005996 | <1e-4 | sll10742 | G0:0055082 | <1e-4 | sll11225 | G0:0003674 | <1e-4 | slr1071  | G0:0005575 | <1e-4 | slr2084  | G0:0005515 | 0.0334 |
| slr1188  | G0:0006720 | <1e-4 | ssr7017  | G0:0034654 | <1e-4 | sll10252 | G0:0022892 | <1e-4 | slr0453  | G0:0044444 | <1e-4 | ssr2781  | G0:0005515 | 0.0334 |
| sll11373 | G0:0019752 | <1e-4 | slr1196  | G0:0071496 | <1e-4 | sll11455 | G0:0005342 | <1e-4 | sll10085 | G0:0044424 | <1e-4 | sll11775 | G0:0005515 | 0.0334 |
| slr6033  | G0:0044282 | <1e-4 | sll11726 | G0:0009199 | <1e-4 | sll11089 | G0:0016462 | <1e-4 | slr6073  | G0:0043226 | <1e-4 | ss13291  | G0:0005515 | 0.0334 |
| slr0872  | G0:0051188 | <1e-4 | sll10274 | G0:0048518 | <1e-4 | sll10266 | G0:0015077 | <1e-4 | sll11251 | G0:0005575 | <1e-4 | sll10647 | G0:0005515 | 0.0334 |
| slr1276  | G0:0008150 | <1e-4 | sll11884 | G0:0051716 | <1e-4 | sll11834 | G0:0016741 | <1e-4 | sll11652 | G0:0044422 | <1e-4 | ssr2754  | G0:0044237 | 0.0333 |
| ssl1498  | G0:0009132 | <1e-4 | sll11730 | G0:0006766 | <1e-4 | slr0157  | G0:0015405 | <1e-4 | sll11911 | G0:0043226 | <1e-4 | sll11925 | G0:0044237 | 0.0333 |
| sll11304 | G0:0050801 | <1e-4 | slr1896  | G0:0009142 | <1e-4 | ssr6085  | G0:0060089 | <1e-4 | slr1263  | G0:0044422 | <1e-4 | slr0149  | G0:0044237 | 0.0333 |
| slr0769  | G0:0016052 | <1e-4 | slr1472  | G0:0009059 | <1e-4 | slr1636  | G0:0022891 | <1e-4 | slr1999  | G0:0005575 | <1e-4 | slr0801  | G0:0044237 | 0.0333 |
| sll10007 | G0:0051347 | <1e-4 | slr1468  | G0:0044283 | <1e-4 | slr1081  | G0:0022890 | <1e-4 | slr0458  | G0:0044425 | <1e-4 | sll11411 | G0:0044237 | 0.0333 |
| slr0569  | G0:0009132 | <1e-4 | sll10639 | G0:0034660 | <1e-4 | slr1944  | G0:0022857 | <1e-4 | slr1880  | G0:0044446 | <1e-4 | slr1862  | G0:0044237 | 0.0333 |
| sll10496 | G0:0051716 | <1e-4 | sll10446 | G0:0046907 | <1e-4 | slr0914  | G0:0015291 | <1e-4 | slr0909  | G0:0005575 | <1e-4 | slr1977  | G0:0044237 | 0.0333 |
| ss10483  | G0:0009142 | <1e-4 | sll11715 | G0:0055082 | <1e-4 | sll10397 | G0:0022892 | <1e-4 | sll15006 | G0:0044422 | <1e-4 | slr1413  | G0:0044237 | 0.0333 |
| sll10281 | G0:0006163 | <1e-4 | slr1906  | G0:0008150 | <1e-4 | slr0380  | G0:0022857 | <1e-4 | ss16092  | G0:0043226 | <1e-4 | slr1338  | G0:0044237 | 0.0333 |
| sll10577 | G0:0005996 | <1e-4 | slr1127  | G0:0034641 | <1e-4 | sll10406 | G0:0022838 | <1e-4 | slr1338  | G0:0043226 | <1e-4 | sll11390 | G0:0044237 | 0.0333 |
| slr1530  | G0:0031640 | <1e-4 | slr1362  | G0:0006732 | <1e-4 | slr1259  | G0:0015075 | <1e-4 | slr6075  | G0:0044444 | <1e-4 | sll11659 | G0:0044237 | 0.0333 |
| ss10352  | G0:0051188 | <1e-4 | slr1702  | G0:0090304 | <1e-4 | sll10765 | G0:0022803 | <1e-4 | ssr7093  | G0:0005575 | <1e-4 | slr0483  | G0:0044237 | 0.0333 |
| sll11472 | G0:0051347 | <1e-4 | sll11250 | G0:0055086 | <1e-4 | sll10048 | G0:0022838 | <1e-4 | slr6057  | G0:0044464 | <1e-4 | slr1122  | G0:0044237 | 0.0333 |
| slr2118  | G0:0048522 | <1e-4 | sll10909 | G0:0010556 | <1e-4 | ss12814  | G0:0042623 | <1e-4 | sll11355 | G0:0044424 | <1e-4 | sll10740 | G0:0044237 | 0.0333 |
| sll10253 | G0:0009263 | <1e-4 | ssr3467  | G0:0006631 | <1e-4 | slr1677  | G0:0022892 | <1e-4 | slr1263  | G0:0005575 | <1e-4 | sll10888 | G0:0044237 | 0.0333 |
| slr6091  | G0:0031323 | <1e-4 | sll10810 | G0:0009262 | <1e-4 | slr7024  | G0:0015399 | <1e-4 | slr1505  | G0:0044424 | <1e-4 | sll11350 | G0:0044237 | 0.0333 |
| sll10765 | G0:0044255 | <1e-4 | sll11414 | G0:0016052 | <1e-4 | sll10630 | G0:0060089 | <1e-4 | sll10590 | G0:0044446 | <1e-4 | slr1415  | G0:0044237 | 0.0333 |
| ssr2333  | G0:0071842 | <1e-4 | slr1920  | G0:0050794 | <1e-4 | ss13142  | G0:0060089 | <1e-4 | slr1162  | G0:0005575 | <1e-4 | ss13382  | G0:0044237 | 0.0333 |
| slr2125  | G0:0071496 | <1e-4 | slr0345  | G0:0042451 | <1e-4 | sll10185 | G0:0015405 | <1e-4 | sll11880 | G0:0044444 | <1e-4 | slr1613  | G0:0044237 | 0.0333 |
| sll10645 | G0:0052111 | <1e-4 | slr1638  | G0:0006082 | <1e-4 | sll11344 | G0:0015291 | <1e-4 | slr2018  | G0:0044444 | <1e-4 | slr1616  | G0:0044237 | 0.0333 |
| slr6039  | G0:0006732 | <1e-4 | slr5087  | G0:0019752 | <1e-4 | sll10875 | G0:0015293 | <1e-4 | sll10449 | G0:0044444 | <1e-4 | sll10911 | G0:0044237 | 0.0333 |
| ss13382  | G0:0051171 | <1e-4 | sll10811 | G0:0034654 | <1e-4 | sll10397 | G0:0022857 | <1e-4 | sll11873 | G0:0044422 | <1e-4 | slr1287  | G0:0044237 | 0.0333 |
| sll1388  | G0:0043436 | <1e-4 | sll11240 | G0:0072524 | <1e-4 | sll15032 | G0:0022838 | <1e-4 | slr7057  | G0:0044422 | <1e-4 | sll10451 | G0:0044237 | 0.0333 |
| ssr3341  | G0:0006811 | <1e-4 | sll11155 | G0:0006066 | <1e-4 | sll11613 | G0:0042623 | <1e-4 | slr7011  | G0:0044444 | <1e-4 | sll10359 | G0:0044237 | 0.0333 |
| sll11123 | G0:0043412 | <1e-4 | slr1819  | G0:0051171 | <1e-4 | slr1222  | G0:0015077 | <1e-4 | sll10614 | G0:0044425 | <1e-4 | sll11654 | G0:0044237 | 0.0333 |
| sll10309 | G0:0071842 | <1e-4 | slr1918  | G0:0009260 | <1e-4 | slr0650  | G0:0005342 | <1e-4 | slr0479  | G0:0044444 | <1e-4 | slr1082  | G0:0044237 | 0.0333 |
| ss10739  | G0:0009059 | <1e-4 | ss13291  | G0:0043412 | <1e-4 | sll10597 | G0:0015077 | <1e-4 | sll11424 | G0:0044464 | <1e-4 | slr2080  | G0:0044237 | 0.0333 |
| sll11219 | G0:0042455 | <1e-4 | sll18001 | G0:0046483 | <1e-4 | sll10785 | G0:0022838 | <1e-4 | slr1940  | G0:0005575 | <1e-4 | sll10981 | G0:0044237 | 0.0333 |
| sll11611 | G0:0043648 | <1e-4 | sll11217 | G0:0051716 | <1e-4 | ss10353  | G0:0016818 | <1e-4 | slr2121  | G0:0044444 | <1e-4 | slr0815  | G0:0044237 | 0.0333 |
| ss12749  | G0:0006066 | <1e-4 | ss11972  | G0:0043170 | <1e-4 | slr1195  | G0:0016817 | <1e-4 | slr1394  | G0:0044444 | <1e-4 | sll11267 | G0:0044237 | 0.0333 |
| ssr2047  | G0:0072527 | <1e-4 | slr1570  | G0:0071840 | <1e-4 | ssr3532  | G0:0042623 | <1e-4 | sll11252 | G0:0043226 | <1e-4 | slr0930  | G0:0044237 | 0.0333 |
| slr1464  | G0:0043170 | <1e-4 | slr0941  | G0:0016054 | <1e-4 | sll11130 | G0:0022890 | <1e-4 | slr7096  | G0:0044444 | <1e-4 | slr0468  | G0:0044237 | 0.0333 |
| slr0509  | G0:0080090 | <1e-4 | ss12971  | G0:0044248 | <1e-4 | slr1624  | G0:0022891 | <1e-4 | sll11158 | G0:0005575 | <1e-4 | slr1288  | G0:0044237 | 0.0333 |
| sll10609 | G0:0050794 | <1e-4 | slr0730  | G0:0019222 | <1e-4 | slr0453  | G0:0043167 | <1e-4 | sll11542 | G0:0044446 | <1e-4 | ssr1528  | G0:0044237 | 0.0333 |
| sll11949 | G0:0065007 | <1e-4 | sll10319 | G0:0006753 | <1e-4 | slr0887  | G0:0060089 | <1e-4 | slr1816  | G0:0005575 | <1e-4 | slr0680  | G0:0044237 | 0.0333 |
| slr2038  | G0:0046164 | <1e-4 | slr0103  | G0:0010468 | <1e-4 | sll10282 | G0:0043167 | <1e-4 | sll11123 | G0:0043226 | <1e-4 | sll11021 | G0:0044237 | 0.0333 |
| slr7098  | G0:0050794 | <1e-4 | sll11217 | G0:0043170 | <1e-4 | slr1276  | G0:0016746 | <1e-4 | sll11671 | G0:0005575 | <1e-4 | slr1152  | G0:0044237 | 0.0333 |
| sll10436 | G0:0009150 | <1e-4 | slr1668  | G0:0048522 | <1e-4 | slr1932  | G0:0043492 | <1e-4 | slr0360  | G0:0044424 | <1e-4 | slr0887  | G0:0044237 | 0.0333 |
| slr1203  | G0:0044275 | <1e-4 | sll10614 | G0:0009141 | <1e-4 | sll10321 | G0:0016746 | <1e-4 | slr7026  | G0:0044444 | <1e-4 | sll11251 | G0:0044237 | 0.0333 |
| ss11520  | G0:0044281 | <1e-4 | sll15030 | G0:0048522 | <1e-4 | slr1623  | G0:0022892 | <1e-4 | sll11062 | G0:0044446 | <1e-4 | sll10297 | G0:0044237 | 0.0333 |
| sll10060 | G0:0051234 | <1e-4 | sll11863 | G0:0006720 | <1e-4 | slr1998  | G0:0003674 | <1e-4 | sll10063 | G0:0044422 | <1e-4 | slr1544  | G0:0044237 | 0.0333 |
| slr0483  | G0:0071554 | <1e-4 | slr0317  | G0:0034654 | <1e-4 | slr0957  | G0:0016462 | <1e-4 | sll10361 | G0:0044444 | <1e-4 | slr1827  | G0:0044237 | 0.0333 |
| sll10761 | G0:0071842 | <1e-4 | slr0376  | G0:0052188 | <1e-4 | sll11272 | G0:0015293 | <1e-4 | slr0053  | G0:0044444 | <1e-4 | sll10296 | G0:0008168 | 0.0331 |
| slr0397  | G0:0009394 | <1e-4 | slr0458  | G0:0006811 | <1e-4 | ss13573  | G0:0043492 | <1e-4 | slr1290  | G0:0044425 | <1e-4 | slr1441  | G0:0008168 | 0.0331 |
| sll10853 | G0:0034654 | <1e-4 | slr0442  | G0:0009142 | <1e-4 | sll10355 | G0:0015399 | <1e-4 | ss11577  | G0:0044464 | <1e-4 | slr0211  | G0:0008168 | 0.0331 |
| sll10925 | G0:0044003 | <1e-4 | slr0168  | G0:0060255 | <1e-4 | sll10939 | G0:0015405 | <1e-4 | sll10525 | G0:0044422 | <1e-4 | ssr2848  | G0:0008168 | 0.0331 |
| slr0333  | G0:0043648 | <1e-4 | sll17067 | G0:0072521 | <1e-4 | ss13549  | G0:0015075 | <1e-4 | slr1450  | G0:0005575 | <1e-4 | slr1866  | G0:0008168 | 0.0331 |
| sll11188 | G0:0031326 | <1e-4 | slr1811  | G0:0050801 | <1e-4 | sll10595 | G0:0015405 | <1e-4 | slr0407  | G0:0044464 | <1e-4 | sll11186 | G0:0008168 | 0.0331 |
| slr1071  | G0:0009892 | <1e-4 | ssr2551  | G0:0008610 | <1e-4 | ssr3154  | G0:0022857 | <1e-4 | sll11186 | G0:0005575 | <1e-4 | ssr3532  | G0:0008168 | 0.0331 |



|         |            |       |         |            |       |         |            |       |         |            |       |         |            |        |
|---------|------------|-------|---------|------------|-------|---------|------------|-------|---------|------------|-------|---------|------------|--------|
| sl11163 | G0:0060255 | <1e-4 | sl11251 | G0:0042180 | <1e-4 | sl11660 | G0:0005342 | <1e-4 | sl10488 | G0:0005575 | <1e-4 | sl11433 | G0:0008168 | 0.0331 |
| sl11262 | G0:0019222 | <1e-4 | sl11193 | G0:0072521 | <1e-4 | sl11763 | G0:0016462 | <1e-4 | sl11477 | G0:0043226 | <1e-4 | sl10864 | G0:0008168 | 0.0331 |
| sl11863 | G0:0009132 | <1e-4 | slr0941 | G0:0009124 | <1e-4 | sl17086 | G0:0022890 | <1e-4 | slr6073 | G0:0044424 | <1e-4 | slr1417 | G0:0008168 | 0.0331 |
| slr1628 | G0:0009889 | <1e-4 | sl11344 | G0:0008150 | <1e-4 | sl10230 | G0:0005342 | <1e-4 | sl10062 | G0:0043226 | <1e-4 | sl11166 | G0:0008168 | 0.0331 |
| slr1079 | G0:0009059 | <1e-4 | sl11853 | G0:0071496 | <1e-4 | slr1438 | G0:0005342 | <1e-4 | ssr6019 | G0:0043226 | <1e-4 | sl10508 | G0:0008168 | 0.0331 |
| slr0458 | G0:0009308 | <1e-4 | slr0765 | G0:0052111 | <1e-4 | slr1207 | G0:0043492 | <1e-4 | sl10781 | G0:0044444 | <1e-4 | slr1398 | G0:0008168 | 0.0331 |
| sl10238 | G0:0006576 | <1e-4 | ssr2755 | G0:0046128 | <1e-4 | sl10615 | G0:0016462 | <1e-4 | sl10442 | G0:0044425 | <1e-4 | slr1222 | G0:0008168 | 0.0331 |
| sl11304 | G0:0051171 | <1e-4 | sl10451 | G0:0044106 | <1e-4 | slr7024 | G0:0016746 | <1e-4 | sl18001 | G0:0005575 | <1e-4 | sl10263 | G0:0008168 | 0.0331 |
| sl10499 | G0:0019752 | <1e-4 | slr1362 | G0:0046164 | <1e-4 | slr0456 | G0:0015075 | <1e-4 | sl10981 | G0:0044422 | <1e-4 | slr1519 | G0:0008168 | 0.0331 |
| sl11071 | G0:0031640 | <1e-4 | sl10274 | G0:0060255 | <1e-4 | sl10661 | G0:0008171 | <1e-4 | slr5013 | G0:0043226 | <1e-4 | slr0551 | G0:0008168 | 0.0331 |
| sl11446 | G0:0046164 | <1e-4 | sl10172 | G0:0046483 | <1e-4 | slr1152 | G0:0022836 | <1e-4 | sl10350 | G0:0044446 | <1e-4 | slr1083 | G0:0008168 | 0.0331 |
| ssl3382 | G0:0051818 | <1e-4 | slr0610 | G0:0071496 | <1e-4 | slr0885 | G0:0060089 | <1e-4 | slr1429 | G0:0044424 | <1e-4 | slr0871 | G0:0008168 | 0.0331 |
| sl17047 | G0:0051171 | <1e-4 | sl10162 | G0:0019219 | <1e-4 | sl10930 | G0:0016817 | <1e-4 | slr1990 | G0:0005575 | <1e-4 | sl10382 | G0:0008168 | 0.0331 |
| sl11995 | G0:0009144 | <1e-4 | slr0480 | G0:0019751 | <1e-4 | sl17078 | G0:0043167 | <1e-4 | sl11307 | G0:0005575 | <1e-4 | slr0503 | G0:0008168 | 0.0331 |
| slr1163 | G0:0009199 | <1e-4 | slr1917 | G0:0006732 | <1e-4 | sl10102 | G0:0022832 | <1e-4 | ssr2553 | G0:0005575 | <1e-4 | sl11715 | G0:0008168 | 0.0331 |
| sl10296 | G0:0043933 | <1e-4 | sl10982 | G0:0044260 | <1e-4 | slr0712 | G0:0043492 | <1e-4 | slr0269 | G0:0043226 | <1e-4 | ssr1698 | G0:0008168 | 0.0331 |
| ssl0242 | G0:0043549 | <1e-4 | slr6091 | G0:0071842 | <1e-4 | slr1143 | G0:0016462 | <1e-4 | slr0305 | G0:0044444 | <1e-4 | slr0476 | G0:0008168 | 0.0331 |
| slr6103 | G0:0033013 | <1e-4 | slr7098 | G0:0034654 | <1e-4 | ssr2803 | G0:0016817 | <1e-4 | sl11240 | G0:0005575 | <1e-4 | sl10447 | G0:0008168 | 0.0331 |
| slr0514 | G0:0046394 | <1e-4 | sl10781 | G0:0050794 | <1e-4 | slr1110 | G0:0015267 | <1e-4 | sl10444 | G0:0005575 | <1e-4 | slr1353 | G0:0008168 | 0.0331 |
| ssl5007 | G0:0044106 | <1e-4 | ssl0352 | G0:0009141 | <1e-4 | ssr6099 | G0:0016817 | <1e-4 | sl18032 | G0:0044464 | <1e-4 | slr1659 | G0:0008168 | 0.0331 |
| sl10931 | G0:0072521 | <1e-4 | slr1920 | G0:0043412 | <1e-4 | slr5073 | G0:0015077 | <1e-4 | slr6014 | G0:0044464 | <1e-4 | sl10547 | G0:0008168 | 0.0331 |
| sl10756 | G0:0006066 | <1e-4 | ssl8008 | G0:0009991 | <1e-4 | sl11882 | G0:0016746 | <1e-4 | slr0383 | G0:0044444 | <1e-4 | slr0589 | G0:0016740 | 0.0329 |
| sl10925 | G0:0071842 | <1e-4 | slr6016 | G0:0050896 | <1e-4 | slr6101 | G0:0005342 | <1e-4 | ssl7039 | G0:0044424 | <1e-4 | ssr1391 | G0:0016740 | 0.0329 |
| slr0211 | G0:0008150 | <1e-4 | slr1259 | G0:0051171 | <1e-4 | slr1406 | G0:0016818 | <1e-4 | slr0103 | G0:0005575 | <1e-4 | sl10788 | G0:0016740 | 0.0329 |
| sl17063 | G0:0034641 | <1e-4 | slr1885 | G0:0009123 | <1e-4 | ssr6002 | G0:0003674 | <1e-4 | slr0208 | G0:0044425 | <1e-4 | sl10361 | G0:0016740 | 0.0329 |
| sl10804 | G0:0051347 | <1e-4 | sl10860 | G0:0009308 | <1e-4 | slr1419 | G0:0043492 | <1e-4 | slr1442 | G0:0044464 | <1e-4 | ssl0353 | G0:0016740 | 0.0329 |
| slr0006 | G0:0019752 | <1e-4 | sl10670 | G0:0019222 | <1e-4 | sl10048 | G0:0016817 | <1e-4 | sl11500 | G0:0044446 | <1e-4 | slr0607 | G0:0016740 | 0.0329 |
| sl11586 | G0:0022607 | <1e-4 | sl10703 | G0:0019219 | <1e-4 | ssr0332 | G0:0060089 | <1e-4 | slr0355 | G0:0005575 | <1e-4 | sl10577 | G0:0016740 | 0.0329 |
| slr1142 | G0:0043412 | <1e-4 | ssr1765 | G0:0050896 | <1e-4 | sl11464 | G0:0016462 | <1e-4 | slr0784 | G0:0005575 | <1e-4 | ssl2996 | G0:0016740 | 0.0329 |
| slr0848 | G0:0016052 | <1e-4 | ssl0788 | G0:0006091 | <1e-4 | sl10781 | G0:0022838 | <1e-4 | slr0789 | G0:0044444 | <1e-4 | slr1143 | G0:0016740 | 0.0329 |
| slr6007 | G0:0033013 | <1e-4 | slr0609 | G0:0009124 | <1e-4 | slr1095 | G0:0015267 | <1e-4 | slr2000 | G0:0005575 | <1e-4 | slr0923 | G0:0016740 | 0.0329 |
| ssl5103 | G0:0044282 | <1e-4 | slr7073 | G0:0042451 | <1e-4 | sl11340 | G0:0043492 | <1e-4 | slr0380 | G0:0005575 | <1e-4 | slr0607 | G0:0005975 | 0.0326 |
| sl10280 | G0:0051716 | <1e-4 | slr1195 | G0:0019219 | <1e-4 | ssr6083 | G0:0016818 | <1e-4 | ssr2754 | G0:0044464 | <1e-4 | slr1847 | G0:0005975 | 0.0326 |
| slr0092 | G0:0046483 | <1e-4 | sl10497 | G0:0044003 | <1e-4 | sl15030 | G0:0015291 | <1e-4 | slr1865 | G0:0005575 | <1e-4 | ssr1391 | G0:0005975 | 0.0326 |
| ssl2996 | G0:0034654 | <1e-4 | slr1541 | G0:0006066 | <1e-4 | sl10602 | G0:0015293 | <1e-4 | slr7013 | G0:0043226 | <1e-4 | sl11611 | G0:0005975 | 0.0326 |
| slr0148 | G0:0051188 | <1e-4 | slr1066 | G0:0034660 | <1e-4 | ssl7048 | G0:0015405 | <1e-4 | ssr2611 | G0:0044464 | <1e-4 | slr0740 | G0:0005975 | 0.0326 |
| sl11355 | G0:0071496 | <1e-4 | ssr6048 | G0:0009892 | <1e-4 | sl10327 | G0:0022832 | <1e-4 | ssl1464 | G0:0044464 | <1e-4 | slr1811 | G0:0005975 | 0.0326 |
| slr0304 | G0:0009262 | <1e-4 | slr0702 | G0:0048519 | <1e-4 | slr1789 | G0:0015267 | <1e-4 | ssr3410 | G0:0005575 | <1e-4 | slr0479 | G0:0005975 | 0.0326 |
| ssr8013 | G0:0031323 | <1e-4 | slr0393 | G0:0034654 | <1e-4 | slr2121 | G0:0015291 | <1e-4 | slr0144 | G0:0044425 | <1e-4 | sl10910 | G0:0005975 | 0.0326 |
| ssl0832 | G0:0051246 | <1e-4 | slr0935 | G0:0050801 | <1e-4 | ssl0312 | G0:0015291 | <1e-4 | slr1866 | G0:0044444 | <1e-4 | sl10505 | G0:0005975 | 0.0326 |
| slr1566 | G0:0019222 | <1e-4 | slr1117 | G0:0051186 | <1e-4 | sl10414 | G0:0015405 | <1e-4 | slr1815 | G0:0044444 | <1e-4 | slr1926 | G0:0005975 | 0.0326 |
| ssr2975 | G0:0019637 | <1e-4 | slr0270 | G0:0006753 | <1e-4 | slr1958 | G0:0003674 | <1e-4 | slr2018 | G0:0044424 | <1e-4 | slr1865 | G0:0005975 | 0.0326 |
| slr7059 | G0:0006721 | <1e-4 | slr1260 | G0:0006066 | <1e-4 | sl10843 | G0:0016818 | <1e-4 | ssr1473 | G0:0044424 | <1e-4 | sl10175 | G0:0005975 | 0.0326 |
| slr0667 | G0:0016054 | <1e-4 | sl18002 | G0:0044248 | <1e-4 | sl11273 | G0:0015077 | <1e-4 | slr0271 | G0:0044425 | <1e-4 | slr0978 | G0:0005975 | 0.0326 |
| ssl1377 | G0:0048523 | <1e-4 | sl11396 | G0:0009893 | <1e-4 | slr0270 | G0:0043492 | <1e-4 | sl11464 | G0:0005575 | <1e-4 | sl10737 | G0:0016772 | 0.0325 |
| ssl2814 | G0:0071496 | <1e-4 | sl11130 | G0:0072524 | <1e-4 | slr0601 | G0:0022892 | <1e-4 | ssl3383 | G0:0044446 | <1e-4 | slr1940 | G0:0016772 | 0.0325 |
| slr1177 | G0:0048519 | <1e-4 | sl11757 | G0:0042180 | <1e-4 | slr8021 | G0:0005342 | <1e-4 | slr0192 | G0:0044464 | <1e-4 | sl10297 | G0:0016772 | 0.0325 |
| sl10481 | G0:0044275 | <1e-4 | slr0816 | G0:0044283 | <1e-4 | slr1907 | G0:0043167 | <1e-4 | ssr2615 | G0:0044425 | <1e-4 | slr0318 | G0:0016772 | 0.0325 |
| slr0386 | G0:0006732 | <1e-4 | sl15046 | G0:0006721 | <1e-4 | sl11400 | G0:0005342 | <1e-4 | ssr6002 | G0:0044424 | <1e-4 | sl10268 | G0:0016772 | 0.0325 |
| slr1918 | G0:0080090 | <1e-4 | ssl2384 | G0:0006163 | <1e-4 | sl10444 | G0:0015405 | <1e-4 | sl11340 | G0:0044464 | <1e-4 | sl11040 | G0:0016772 | 0.0325 |
| sl17055 | G0:0009394 | <1e-4 | slr0273 | G0:0071840 | <1e-4 | slr1613 | G0:0022836 | <1e-4 | sl10847 | G0:0044425 | <1e-4 | slr1613 | G0:0016772 | 0.0325 |
| slr1462 | G0:0019222 | <1e-4 | sl10508 | G0:0022607 | <1e-4 | sl11250 | G0:0022892 | <1e-4 | sl11447 | G0:0044446 | <1e-4 | slr0935 | G0:0016772 | 0.0325 |
| sl10499 | G0:0009161 | <1e-4 | sl10023 | G0:0043648 | <1e-4 | ssl1300 | G0:0043492 | <1e-4 | sl11485 | G0:0005575 | <1e-4 | sl10997 | G0:0016772 | 0.0325 |
| slr0491 | G0:0034641 | <1e-4 | sl10286 | G0:0009057 | <1e-4 | sl10022 | G0:0003674 | <1e-4 | sl11285 | G0:0044424 | <1e-4 | slr0924 | G0:0016772 | 0.0325 |

|         |            |       |         |            |       |         |            |       |         |            |       |         |            |        |
|---------|------------|-------|---------|------------|-------|---------|------------|-------|---------|------------|-------|---------|------------|--------|
| sl10656 | G0:0019362 | <1e-4 | slr0476 | G0:0001932 | <1e-4 | sl10864 | G0:0015075 | <1e-4 | slr2010 | G0:0043226 | <1e-4 | slr0729 | G0:0016772 | 0.0325 |
| sl11531 | G0:0055082 | <1e-4 | slr1628 | G0:0031326 | <1e-4 | sl10301 | G0:0015075 | <1e-4 | sl10543 | G0:0005575 | <1e-4 | sl10585 | G0:0016772 | 0.0325 |
| sl15097 | G0:0019222 | <1e-4 | slr6009 | G0:0046394 | <1e-4 | slr7015 | G0:0015405 | <1e-4 | slr1611 | G0:0044446 | <1e-4 | slr0358 | G0:0016772 | 0.0325 |
| slr6029 | G0:0009892 | <1e-4 | slr0092 | G0:0048518 | <1e-4 | ss12138 | G0:0015267 | <1e-4 | sl11400 | G0:0043226 | <1e-4 | slr0060 | G0:0016772 | 0.0325 |
| slr7015 | G0:0009394 | <1e-4 | sl10815 | G0:0031326 | <1e-4 | slr1970 | G0:0022803 | <1e-4 | slr0262 | G0:0044424 | <1e-4 | sl11582 | G0:0016772 | 0.0325 |
| ssr0336 | G0:0072521 | <1e-4 | sl11640 | G0:0051246 | <1e-4 | sl10853 | G0:0022803 | <1e-4 | sl10071 | G0:0005575 | <1e-4 | slr0962 | G0:0016772 | 0.0325 |
| ssr7093 | G0:0009394 | <1e-4 | slr1162 | G0:0065007 | <1e-4 | sl11866 | G0:0015399 | <1e-4 | slr1101 | G0:0044425 | <1e-4 | sl11738 | G0:0016772 | 0.0325 |
| slr1070 | G0:0050896 | <1e-4 | slr0606 | G0:0009893 | <1e-4 | slr1647 | G0:0015075 | <1e-4 | sl11956 | G0:0005575 | <1e-4 | ss13382 | G0:0016772 | 0.0325 |
| slr1082 | G0:0009991 | <1e-4 | sl11570 | G0:0043933 | <1e-4 | slr0957 | G0:0022803 | <1e-4 | slr2118 | G0:0044446 | <1e-4 | slr1541 | G0:0016772 | 0.0325 |
| sl11072 | G0:0052111 | <1e-4 | ssr0336 | G0:0050896 | <1e-4 | sl11063 | G0:0015075 | <1e-4 | sl11915 | G0:0044446 | <1e-4 | sl11399 | G0:0016772 | 0.0325 |
| slr1951 | G0:0009124 | <1e-4 | slr0634 | G0:0009132 | <1e-4 | sl10532 | G0:0022857 | <1e-4 | ssr2009 | G0:0043226 | <1e-4 | ss10739 | G0:0016772 | 0.0325 |
| ssr3532 | G0:0009892 | <1e-4 | slr6038 | G0:0019751 | <1e-4 | sl10785 | G0:0015291 | <1e-4 | slr1062 | G0:0044425 | <1e-4 | slr1128 | G0:0016772 | 0.0325 |
| slr1571 | G0:0033013 | <1e-4 | slr0146 | G0:0009987 | <1e-4 | slr1168 | G0:0022838 | <1e-4 | slr0269 | G0:0044424 | <1e-4 | sl10981 | G0:0016772 | 0.0325 |
| slr6008 | G0:0006163 | <1e-4 | slr1811 | G0:0050789 | <1e-4 | ssr1155 | G0:0022803 | <1e-4 | ss10242 | G0:0005575 | <1e-4 | slr0989 | G0:0016772 | 0.0325 |
| slr0590 | G0:0033013 | <1e-4 | slr0168 | G0:0044281 | <1e-4 | slr0270 | G0:0016818 | <1e-4 | ss13573 | G0:0005575 | <1e-4 | slr1690 | G0:0016772 | 0.0325 |
| slr0337 | G0:0006066 | <1e-4 | ssr0692 | G0:0080090 | <1e-4 | slr1363 | G0:0015293 | <1e-4 | slr1468 | G0:0044422 | <1e-4 | sl10781 | G0:0016772 | 0.0325 |
| sl11751 | G0:0009889 | <1e-4 | slr1235 | G0:0034654 | <1e-4 | slr7011 | G0:0022891 | <1e-4 | slr1474 | G0:0005575 | <1e-4 | slr1288 | G0:0016772 | 0.0325 |
| slr2117 | G0:0051347 | <1e-4 | sl10024 | G0:0006721 | <1e-4 | slr1863 | G0:0016741 | <1e-4 | slr0801 | G0:0043226 | <1e-4 | sl11173 | G0:0016772 | 0.0325 |
| slr6014 | G0:0055082 | <1e-4 | slr6008 | G0:0044275 | <1e-4 | slr2117 | G0:0015267 | <1e-4 | sl11025 | G0:0005575 | <1e-4 | sl11240 | G0:0016772 | 0.0325 |
| slr1537 | G0:0009260 | <1e-4 | sl10595 | G0:0042455 | <1e-4 | slr1066 | G0:0022832 | <1e-4 | slr1999 | G0:0044446 | <1e-4 | sl10588 | G0:0016772 | 0.0325 |
| ss12814 | G0:0006733 | <1e-4 | sl10732 | G0:0019219 | <1e-4 | slr1847 | G0:0015399 | <1e-4 | slr0609 | G0:0044444 | <1e-4 | slr0149 | G0:0016772 | 0.0325 |
| sl10864 | G0:0001932 | <1e-4 | sl11526 | G0:0048518 | <1e-4 | slr2125 | G0:0060089 | <1e-4 | sl10428 | G0:0044444 | <1e-4 | slr0112 | G0:0016772 | 0.0325 |
| ss18008 | G0:0006766 | <1e-4 | sl11304 | G0:0009309 | <1e-4 | sl17006 | G0:0043492 | <1e-4 | sl10752 | G0:0043226 | <1e-4 | slr0975 | G0:0016772 | 0.0325 |
| ss15025 | G0:0006220 | <1e-4 | ssr0336 | G0:0006811 | <1e-4 | slr1809 | G0:0042623 | <1e-4 | sl11715 | G0:0044444 | <1e-4 | sl17065 | G0:0016772 | 0.0325 |
| ssr2754 | G0:0008150 | <1e-4 | sl11160 | G0:0042180 | <1e-4 | slr7025 | G0:0015267 | <1e-4 | ssr2047 | G0:0044464 | <1e-4 | slr0650 | G0:0016772 | 0.0325 |
| slr1188 | G0:0009394 | <1e-4 | sl11542 | G0:0016052 | <1e-4 | slr7097 | G0:0016462 | <1e-4 | slr1612 | G0:0005575 | <1e-4 | slr0483 | G0:0016772 | 0.0325 |
| sl11355 | G0:0009259 | <1e-4 | sl10503 | G0:0044281 | <1e-4 | slr1572 | G0:0015405 | <1e-4 | sl11691 | G0:0043226 | <1e-4 | slr1862 | G0:0016772 | 0.0325 |
| slr0590 | G0:0006066 | <1e-4 | slr1178 | G0:0044283 | <1e-4 | ss12814 | G0:0060089 | <1e-4 | ss15096 | G0:0044446 | <1e-4 | sm10011 | G0:0016772 | 0.0325 |
| sl10503 | G0:0051171 | <1e-4 | slr0082 | G0:0072522 | <1e-4 | slr1162 | G0:0015405 | <1e-4 | slr0579 | G0:0044425 | <1e-4 | slr0373 | G0:0016772 | 0.0325 |
| slr6012 | G0:0009142 | <1e-4 | ssr6099 | G0:0009059 | <1e-4 | slr1470 | G0:0008171 | <1e-4 | sl10267 | G0:0044446 | <1e-4 | sl10281 | G0:0016772 | 0.0325 |
| sl11882 | G0:0044106 | <1e-4 | sl10354 | G0:0052111 | <1e-4 | slr0554 | G0:0043492 | <1e-4 | slr2073 | G0:0044425 | <1e-4 | slr0605 | G0:0016772 | 0.0325 |
| slr0888 | G0:0044260 | <1e-4 | slr6064 | G0:0045184 | <1e-4 | sl10268 | G0:0015293 | <1e-4 | slr6039 | G0:0005575 | <1e-4 | sl10564 | G0:0016772 | 0.0325 |
| ssr6030 | G0:0043170 | <1e-4 | slr1660 | G0:0009199 | <1e-4 | sl11940 | G0:0015267 | <1e-4 | slr6104 | G0:0044422 | <1e-4 | sl11956 | G0:0016772 | 0.0325 |
| sg10001 | G0:0009308 | <1e-4 | ss18003 | G0:0071496 | <1e-4 | sl17087 | G0:0015293 | <1e-4 | ss12996 | G0:0044422 | <1e-4 | slr1827 | G0:0016772 | 0.0325 |
| slr1150 | G0:0051246 | <1e-4 | slr1964 | G0:0006721 | <1e-4 | slr0049 | G0:0015399 | <1e-4 | slr6028 | G0:0044425 | <1e-4 | sl11390 | G0:0016772 | 0.0325 |
| ssr6083 | G0:0034660 | <1e-4 | sl10394 | G0:0009394 | <1e-4 | sl11063 | G0:0015405 | <1e-4 | slr1464 | G0:0044424 | <1e-4 | sl11071 | G0:0016772 | 0.0325 |
| slr0458 | G0:0009165 | <1e-4 | sl11306 | G0:0055114 | <1e-4 | slr0196 | G0:0042623 | <1e-4 | slr0581 | G0:0044425 | <1e-4 | slr0455 | G0:0016772 | 0.0325 |
| slr1816 | G0:0072524 | <1e-4 | sl10023 | G0:0009991 | <1e-4 | sl15006 | G0:0015293 | <1e-4 | sl15046 | G0:0044422 | <1e-4 | sl10911 | G0:0016772 | 0.0325 |
| sl10498 | G0:0008150 | <1e-4 | sl10761 | G0:0009124 | <1e-4 | slr6013 | G0:0003674 | <1e-4 | sl10024 | G0:0044444 | <1e-4 | slr0169 | G0:0016772 | 0.0325 |
| slr5024 | G0:0080090 | <1e-4 | slr0890 | G0:0009117 | <1e-4 | sl10864 | G0:0022891 | <1e-4 | ss17048 | G0:0005575 | <1e-4 | sl10572 | G0:0016772 | 0.0325 |
| sl10024 | G0:0043933 | <1e-4 | ss12064 | G0:0044248 | <1e-4 | sl10478 | G0:0008171 | <1e-4 | sl10639 | G0:0044464 | <1e-4 | slr2005 | G0:0016772 | 0.0325 |
| ssr5106 | G0:0009987 | <1e-4 | slr1032 | G0:0071554 | <1e-4 | sl10350 | G0:0015293 | <1e-4 | sl10524 | G0:0043226 | <1e-4 | sl10149 | G0:0016787 | 0.0316 |
| sl11381 | G0:0051186 | <1e-4 | slr6015 | G0:0006732 | <1e-4 | sl10785 | G0:0022891 | <1e-4 | sl10242 | G0:0043234 | <1e-4 | ss10750 | G0:0004871 | 0.0311 |
| slr2092 | G0:0071496 | <1e-4 | slr1774 | G0:0031323 | <1e-4 | sl10243 | G0:0003674 | <1e-4 | slr1053 | G0:0044422 | <1e-4 | sl10350 | G0:0004871 | 0.0311 |
| slr7071 | G0:0042180 | <1e-4 | slr1053 | G0:0009309 | <1e-4 | sl18001 | G0:0043167 | <1e-4 | slr1070 | G0:0044424 | <1e-4 | slr1614 | G0:0004871 | 0.0311 |
| slr0980 | G0:0009309 | <1e-4 | sl15069 | G0:0009309 | <1e-4 | sl11702 | G0:0015405 | <1e-4 | slr7071 | G0:0005575 | <1e-4 | sl11424 | G0:0016740 | 0.0308 |
| slr7024 | G0:0034641 | <1e-4 | sl11106 | G0:0010468 | <1e-4 | slr1152 | G0:0016817 | <1e-4 | sl10282 | G0:0005575 | <1e-4 | slr2018 | G0:0016740 | 0.0308 |
| slr7073 | G0:0009199 | <1e-4 | sl11446 | G0:0006732 | <1e-4 | slr1940 | G0:0022890 | <1e-4 | sl11891 | G0:0044464 | <1e-4 | ssr1258 | G0:0016740 | 0.0308 |
| slr7013 | G0:0006631 | <1e-4 | sl11232 | G0:0009991 | <1e-4 | slr0981 | G0:0016746 | <1e-4 | sl11830 | G0:0005575 | <1e-4 | slr0408 | G0:0016740 | 0.0308 |
| slr1815 | G0:0046164 | <1e-4 | sl11956 | G0:0009308 | <1e-4 | slr6005 | G0:0015075 | <1e-4 | slr1343 | G0:0044422 | <1e-4 | slr0980 | G0:0016740 | 0.0308 |
| sl17034 | G0:0006793 | <1e-4 | slr0482 | G0:0009263 | <1e-4 | sl10843 | G0:0015075 | <1e-4 | slr0038 | G0:0044422 | <1e-4 | sl10702 | G0:0016740 | 0.0308 |
| sl11630 | G0:0006811 | <1e-4 | sl11464 | G0:0009132 | <1e-4 | slr1570 | G0:0016746 | <1e-4 | slr7099 | G0:0005575 | <1e-4 | sl11119 | G0:0016740 | 0.0308 |
| slr0634 | G0:0022411 | <1e-4 | slr1419 | G0:0033013 | <1e-4 | slr6104 | G0:0043492 | <1e-4 | slr0594 | G0:0043226 | <1e-4 | slr1110 | G0:0016740 | 0.0308 |
| sl11273 | G0:0009124 | <1e-4 | ss15027 | G0:0016053 | <1e-4 | slr1383 | G0:0016746 | <1e-4 | slr0722 | G0:0005575 | <1e-4 | sl10763 | G0:0016740 | 0.0308 |

|         |            |       |         |            |       |         |            |       |         |            |       |          |            |        |
|---------|------------|-------|---------|------------|-------|---------|------------|-------|---------|------------|-------|----------|------------|--------|
| slr0489 | G0:0051347 | <1e-4 | ssr1114 | G0:0048522 | <1e-4 | sl10678 | G0:0022892 | <1e-4 | slr0211 | G0:0044422 | <1e-4 | slr1413  | G0:0016820 | 0.0306 |
| slr0092 | G0:0048523 | <1e-4 | sl10787 | G0:0071554 | <1e-4 | ss10788 | G0:0016818 | <1e-4 | slr1911 | G0:0044422 | <1e-4 | sl11752  | G0:0016820 | 0.0306 |
| slr0482 | G0:0080090 | <1e-4 | sl10563 | G0:0048519 | <1e-4 | slr0317 | G0:0022890 | <1e-4 | slr0770 | G0:0044425 | <1e-4 | sl117065 | G0:0016820 | 0.0306 |
| slr8044 | G0:0072522 | <1e-4 | ssr2611 | G0:0071554 | <1e-4 | sl10253 | G0:0016818 | <1e-4 | slr0888 | G0:0043226 | <1e-4 | ssr1528  | G0:0016820 | 0.0306 |
| slr0890 | G0:0019751 | <1e-4 | slr0458 | G0:0010468 | <1e-4 | slr0287 | G0:0003674 | <1e-4 | sl10192 | G0:0044422 | <1e-4 | slr0742  | G0:0016820 | 0.0306 |
| slr1023 | G0:0009117 | <1e-4 | ss12148 | G0:0072524 | <1e-4 | sl10405 | G0:0016462 | <1e-4 | sl11906 | G0:0044425 | <1e-4 | sl10980  | G0:0016820 | 0.0306 |
| sl10198 | G0:0019222 | <1e-4 | sl10898 | G0:0009165 | <1e-4 | slr6033 | G0:0003674 | <1e-4 | sl11714 | G0:0044444 | <1e-4 | sl10787  | G0:0016820 | 0.0306 |
| slr0305 | G0:0034641 | <1e-4 | slr1081 | G0:0050789 | <1e-4 | slr1613 | G0:0016746 | <1e-4 | sl10744 | G0:0044422 | <1e-4 | slr1636  | G0:0003723 | 0.0306 |
| sl11472 | G0:0009260 | <1e-4 | sl11464 | G0:0019219 | <1e-4 | ss15065 | G0:0016817 | <1e-4 | sl15063 | G0:0043226 | <1e-4 | sl10888  | G0:0016820 | 0.0306 |
| sl10585 | G0:0006721 | <1e-4 | slr1034 | G0:0031640 | <1e-4 | sl11155 | G0:0043167 | <1e-4 | sl10499 | G0:0044424 | <1e-4 | slr7024  | G0:0016820 | 0.0306 |
| ssr3571 | G0:0009142 | <1e-4 | slr1800 | G0:0046128 | <1e-4 | slr0789 | G0:0015267 | <1e-4 | slr1209 | G0:0044464 | <1e-4 | slr1052  | G0:0003723 | 0.0306 |
| slr1449 | G0:0009150 | <1e-4 | slr2118 | G0:0044260 | <1e-4 | slr0172 | G0:0022803 | <1e-4 | slr0978 | G0:0044422 | <1e-4 | sl10595  | G0:0016820 | 0.0306 |
| sl10031 | G0:0048522 | <1e-4 | sl15089 | G0:0046164 | <1e-4 | slr0821 | G0:0015293 | <1e-4 | sl11306 | G0:0044444 | <1e-4 | slr1303  | G0:0016820 | 0.0306 |
| slr7102 | G0:0009394 | <1e-4 | sl10253 | G0:0016052 | <1e-4 | slr5077 | G0:0015399 | <1e-4 | sl18012 | G0:0005575 | <1e-4 | sl10781  | G0:0016820 | 0.0306 |
| sl11613 | G0:0009161 | <1e-4 | slr1577 | G0:0006091 | <1e-4 | ssr0102 | G0:0043167 | <1e-4 | slr0740 | G0:0044444 | <1e-4 | slr1862  | G0:0016820 | 0.0306 |
| slr1563 | G0:0044283 | <1e-4 | sl10513 | G0:0080090 | <1e-4 | slr1436 | G0:0015291 | <1e-4 | slr0645 | G0:0043226 | <1e-4 | sl11251  | G0:0016820 | 0.0306 |
| slr6063 | G0:0009893 | <1e-4 | slr1413 | G0:0048523 | <1e-4 | slr0111 | G0:0015291 | <1e-4 | sl10735 | G0:0044424 | <1e-4 | sl10572  | G0:0016820 | 0.0306 |
| slr1209 | G0:0072522 | <1e-4 | sl11372 | G0:0019219 | <1e-4 | sl11071 | G0:0005342 | <1e-4 | sl11757 | G0:0044425 | <1e-4 | sl11170  | G0:0016820 | 0.0306 |
| sl11254 | G0:0009165 | <1e-4 | sl10994 | G0:0051186 | <1e-4 | sl17062 | G0:0015399 | <1e-4 | sl10867 | G0:0044444 | <1e-4 | slr1658  | G0:0016820 | 0.0306 |
| ssr6089 | G0:0051716 | <1e-4 | sl11608 | G0:0031326 | <1e-4 | ssr1528 | G0:0015293 | <1e-4 | sl11193 | G0:0005575 | <1e-4 | sl11654  | G0:0016820 | 0.0306 |
| slr6100 | G0:0072527 | <1e-4 | sl10473 | G0:0034654 | <1e-4 | slr1394 | G0:0022891 | <1e-4 | slr1116 | G0:0044446 | <1e-4 | sl10281  | G0:0016820 | 0.0306 |
| slr1215 | G0:0042180 | <1e-4 | slr7012 | G0:0009150 | <1e-4 | slr7023 | G0:0022832 | <1e-4 | sl10293 | G0:0005575 | <1e-4 | sl10156  | G0:0016820 | 0.0306 |
| sl10872 | G0:0009057 | <1e-4 | sl11882 | G0:0009123 | <1e-4 | sl10413 | G0:0016817 | <1e-4 | slr0606 | G0:0005575 | <1e-4 | sl10449  | G0:0016820 | 0.0306 |
| ssr1528 | G0:0044248 | <1e-4 | slr1066 | G0:0019219 | <1e-4 | slr0459 | G0:0060089 | <1e-4 | sl11586 | G0:0044464 | <1e-4 | slr1062  | G0:0016820 | 0.0306 |
| slr6049 | G0:0044283 | <1e-4 | slr6100 | G0:0010556 | <1e-4 | sl11660 | G0:0022857 | <1e-4 | slr7015 | G0:0044446 | <1e-4 | slr0149  | G0:0016820 | 0.0306 |
| slr1287 | G0:0044255 | <1e-4 | slr1774 | G0:0019752 | <1e-4 | slr6013 | G0:0022838 | <1e-4 | slr0110 | G0:0044446 | <1e-4 | slr0729  | G0:0016820 | 0.0306 |
| slr0863 | G0:0050794 | <1e-4 | sl11472 | G0:0051188 | <1e-4 | slr1674 | G0:0043167 | <1e-4 | sl11751 | G0:0044424 | <1e-4 | slr1383  | G0:0016820 | 0.0306 |
| sl10243 | G0:0034641 | <1e-4 | slr1767 | G0:0009161 | <1e-4 | slr1699 | G0:0016818 | <1e-4 | ssr5092 | G0:0043226 | <1e-4 | sl10837  | G0:0016820 | 0.0306 |
| sl11866 | G0:0006793 | <1e-4 | slr0364 | G0:0072522 | <1e-4 | slr6045 | G0:0008171 | <1e-4 | slr0388 | G0:0005575 | <1e-4 | slr1033  | G0:0016820 | 0.0306 |
| slr1122 | G0:0009262 | <1e-4 | slr0111 | G0:0051179 | <1e-4 | sl11906 | G0:0015291 | <1e-4 | sl10335 | G0:0005575 | <1e-4 | sl11054  | G0:0016820 | 0.0306 |
| sl11784 | G0:0009987 | <1e-4 | slr0431 | G0:0009124 | <1e-4 | sl11389 | G0:0022890 | <1e-4 | slr1811 | G0:0044446 | <1e-4 | sl11239  | G0:0016820 | 0.0306 |
| slr1990 | G0:0009394 | <1e-4 | slr1999 | G0:0048523 | <1e-4 | slr2003 | G0:0015405 | <1e-4 | sl11503 | G0:0005575 | <1e-4 | slr0468  | G0:0016820 | 0.0306 |
| slr0208 | G0:0031326 | <1e-4 | sl11541 | G0:0048519 | <1e-4 | sl10752 | G0:0003674 | <1e-4 | slr0521 | G0:0044464 | <1e-4 | sl11267  | G0:0016820 | 0.0306 |
| slr0731 | G0:0048523 | <1e-4 | sl10670 | G0:0065007 | <1e-4 | sl11834 | G0:0015291 | <1e-4 | ssr7079 | G0:0043226 | <1e-4 | sl10737  | G0:0016820 | 0.0306 |
| sl11006 | G0:0006066 | <1e-4 | slr1913 | G0:0055086 | <1e-4 | sl11455 | G0:0022836 | <1e-4 | slr1658 | G0:0005575 | <1e-4 | slr1940  | G0:0016820 | 0.0306 |
| slr5102 | G0:0050794 | <1e-4 | slr0709 | G0:0009161 | <1e-4 | slr0668 | G0:0022803 | <1e-4 | slr1069 | G0:0044444 | <1e-4 | sl10685  | G0:0016820 | 0.0306 |
| sl11132 | G0:0009144 | <1e-4 | slr1025 | G0:0006082 | <1e-4 | sl10749 | G0:0022803 | <1e-4 | slr1778 | G0:0044424 | <1e-4 | slr0654  | G0:0016820 | 0.0306 |
| ss11690 | G0:0019637 | <1e-4 | slr1303 | G0:0006766 | <1e-4 | sl11954 | G0:0015291 | <1e-4 | slr1591 | G0:0044424 | <1e-4 | slr0373  | G0:0016820 | 0.0306 |
| sl11656 | G0:0046483 | <1e-4 | ssr2317 | G0:0044282 | <1e-4 | sl11863 | G0:0016817 | <1e-4 | sl15069 | G0:0005575 | <1e-4 | slr1668  | G0:0016820 | 0.0306 |
| slr1023 | G0:0009259 | <1e-4 | ss15025 | G0:0009132 | <1e-4 | sl16052 | G0:0022857 | <1e-4 | sl10659 | G0:0005575 | <1e-4 | sl11738  | G0:0016820 | 0.0306 |
| slr0192 | G0:0019752 | <1e-4 | sl11174 | G0:0019752 | <1e-4 | sl11956 | G0:0015077 | <1e-4 | sl10048 | G0:0044425 | <1e-4 | sl10359  | G0:0016820 | 0.0306 |
| sl11749 | G0:0034641 | <1e-4 | sl10543 | G0:0009991 | <1e-4 | ss17038 | G0:0022857 | <1e-4 | sl11949 | G0:0005575 | <1e-4 | sl11241  | G0:0016820 | 0.0306 |
| sl10216 | G0:0009123 | <1e-4 | sl10263 | G0:0044248 | <1e-4 | slr6016 | G0:0015075 | <1e-4 | sl11170 | G0:0044444 | <1e-4 | slr0060  | G0:0016820 | 0.0306 |
| slr5111 | G0:0006753 | <1e-4 | sl10602 | G0:0048518 | <1e-4 | sl10293 | G0:0022891 | <1e-4 | sl10400 | G0:0044424 | <1e-4 | slr1082  | G0:0016820 | 0.0306 |
| sl15026 | G0:0019752 | <1e-4 | ss11378 | G0:0022607 | <1e-4 | sl10442 | G0:0022836 | <1e-4 | ssr6032 | G0:0044444 | <1e-4 | slr2048  | G0:0016820 | 0.0306 |
| ssr5019 | G0:0050896 | <1e-4 | slr1163 | G0:0009124 | <1e-4 | sl11062 | G0:0022836 | <1e-4 | slr1050 | G0:0044424 | <1e-4 | slr1493  | G0:0016820 | 0.0306 |
| slr5023 | G0:0009394 | <1e-4 | slr5037 | G0:0009141 | <1e-4 | slr6073 | G0:0022832 | <1e-4 | sl11961 | G0:0044446 | <1e-4 | slr1762  | G0:0016820 | 0.0306 |
| slr1935 | G0:0031326 | <1e-4 | slr6014 | G0:0009144 | <1e-4 | sl11306 | G0:0016818 | <1e-4 | slr0728 | G0:0044422 | <1e-4 | sl11225  | G0:0016820 | 0.0306 |
| slr1215 | G0:0022411 | <1e-4 | slr0935 | G0:0019752 | <1e-4 | slr0145 | G0:0005342 | <1e-4 | ss15015 | G0:0005575 | <1e-4 | slr0962  | G0:0016820 | 0.0306 |
| slr1045 | G0:0010556 | <1e-4 | slr0431 | G0:0009199 | <1e-4 | sl15033 | G0:0022832 | <1e-4 | sl10369 | G0:0044424 | <1e-4 | slr0358  | G0:0016820 | 0.0306 |
| ss12781 | G0:0009987 | <1e-4 | slr0172 | G0:0009126 | <1e-4 | sl10857 | G0:0042623 | <1e-4 | sl11736 | G0:0044424 | <1e-4 | slr0249  | G0:0016820 | 0.0306 |
| sl11022 | G0:0071841 | <1e-4 | slr0408 | G0:0009987 | <1e-4 | slr1851 | G0:0016817 | <1e-4 | sl10742 | G0:0044446 | <1e-4 | slr2005  | G0:0016820 | 0.0306 |
| slr0157 | G0:0009126 | <1e-4 | slr1206 | G0:0044255 | <1e-4 | ss15113 | G0:0015405 | <1e-4 | sl11254 | G0:0005575 | <1e-4 | slr0232  | G0:0016820 | 0.0306 |
| slr1505 | G0:0005996 | <1e-4 | sl10314 | G0:0016052 | <1e-4 | sl10162 | G0:0015077 | <1e-4 | sl10069 | G0:0044444 | <1e-4 | slr0554  | G0:0016820 | 0.0306 |

|         |            |       |          |            |       |         |            |       |         |            |       |         |            |        |
|---------|------------|-------|----------|------------|-------|---------|------------|-------|---------|------------|-------|---------|------------|--------|
| slr0468 | G0:0006091 | <1e-4 | slr1752  | G0:0072524 | <1e-4 | sl10498 | G0:0015405 | <1e-4 | slr0642 | G0:0044422 | <1e-4 | sl10585 | G0:0016820 | 0.0306 |
| slr0554 | G0:0009059 | <1e-4 | slr0184  | G0:0072522 | <1e-4 | slr5127 | G0:0005342 | <1e-4 | ss10461 | G0:0044424 | <1e-4 | sl10911 | G0:0016820 | 0.0306 |
| slr1266 | G0:0009124 | <1e-4 | sl110188 | G0:0052188 | <1e-4 | sl10253 | G0:0015293 | <1e-4 | slr1906 | G0:0005575 | <1e-4 | slr0510 | G0:0016820 | 0.0306 |
| sl10608 | G0:0065007 | <1e-4 | ssr0692  | G0:0051179 | <1e-4 | sl10168 | G0:0022891 | <1e-4 | slr1541 | G0:0044424 | <1e-4 | sl10505 | G0:0008168 | 0.0297 |
| slr0601 | G0:0008150 | <1e-4 | slr0172  | G0:0009260 | <1e-4 | slr0264 | G0:0015075 | <1e-4 | slr1278 | G0:0043226 | <1e-4 | ssr1391 | G0:0008168 | 0.0297 |
| slr0049 | G0:0034654 | <1e-4 | sl11691  | G0:0033013 | <1e-4 | slr1203 | G0:0005342 | <1e-4 | sl11735 | G0:0044444 | <1e-4 | sl10192 | G0:0008168 | 0.0297 |
| slr0172 | G0:0031326 | <1e-4 | slr0587  | G0:0006163 | <1e-4 | sl11426 | G0:0015405 | <1e-4 | sl10860 | G0:0043226 | <1e-4 | slr1800 | G0:0008168 | 0.0297 |
| slr2105 | G0:0043648 | <1e-4 | slr1533  | G0:0043933 | <1e-4 | slr1624 | G0:0022838 | <1e-4 | sl11164 | G0:0044446 | <1e-4 | sl11751 | G0:0008168 | 0.0297 |
| slr1566 | G0:0048518 | <1e-4 | ss15129  | G0:0048522 | <1e-4 | slr1056 | G0:0003674 | <1e-4 | slr1053 | G0:0044446 | <1e-4 | slr1307 | G0:0008168 | 0.0297 |
| ss18008 | G0:0044271 | <1e-4 | ssr2962  | G0:0044003 | <1e-4 | ssr1768 | G0:0015293 | <1e-4 | sl10443 | G0:0044425 | <1e-4 | sl10361 | G0:0008168 | 0.0297 |
| sl15132 | G0:0052188 | <1e-4 | sl11722  | G0:0051246 | <1e-4 | slr1812 | G0:0022832 | <1e-4 | sl10297 | G0:0005575 | <1e-4 | slr0607 | G0:0008168 | 0.0297 |
| slr6007 | G0:0043170 | <1e-4 | slr1885  | G0:0051716 | <1e-4 | slr0398 | G0:0022832 | <1e-4 | sl11611 | G0:0043226 | <1e-4 | slr0496 | G0:0008168 | 0.0297 |
| slr7082 | G0:0046164 | <1e-4 | ss10832  | G0:0060255 | <1e-4 | sl17028 | G0:0008171 | <1e-4 | slr0667 | G0:0005575 | <1e-4 | slr0978 | G0:0008168 | 0.0297 |
| ssr2439 | G0:0072527 | <1e-4 | slr0913  | G0:0071841 | <1e-4 | slr0978 | G0:0005342 | <1e-4 | ssr2422 | G0:0043226 | <1e-4 | slr1726 | G0:0008168 | 0.0297 |
| slr1068 | G0:0044248 | <1e-4 | ssr3409  | G0:0008610 | <1e-4 | slr5127 | G0:0022832 | <1e-4 | slr1603 | G0:0044464 | <1e-4 | sl11562 | G0:0008168 | 0.0297 |
| slr1173 | G0:0022607 | <1e-4 | sl10174  | G0:0031326 | <1e-4 | slr0269 | G0:0015291 | <1e-4 | sl10424 | G0:0044424 | <1e-4 | slr1098 | G0:0008168 | 0.0297 |
| slr2025 | G0:0050794 | <1e-4 | sl10585  | G0:0051716 | <1e-4 | slr1045 | G0:0015293 | <1e-4 | slr0489 | G0:0044444 | <1e-4 | slr0514 | G0:0008168 | 0.0297 |
| slr0642 | G0:0009987 | <1e-4 | sl10804  | G0:0009117 | <1e-4 | sl11262 | G0:0015077 | <1e-4 | slr1951 | G0:0044422 | <1e-4 | sl10783 | G0:0008168 | 0.0297 |
| sl11942 | G0:0019222 | <1e-4 | slr0112  | G0:0008150 | <1e-4 | sl11769 | G0:0016741 | <1e-4 | slr1627 | G0:0044422 | <1e-4 | sl11526 | G0:0008168 | 0.0297 |
| ssr3402 | G0:0034660 | <1e-4 | sl11089  | G0:0043549 | <1e-4 | slr0049 | G0:0043492 | <1e-4 | slr1187 | G0:0044444 | <1e-4 | slr0909 | G0:0008168 | 0.0297 |
| slr1114 | G0:0006631 | <1e-4 | sl11306  | G0:0055082 | <1e-4 | slr0957 | G0:0003674 | <1e-4 | ss15108 | G0:0005575 | <1e-4 | sl11573 | G0:0004871 | 0.0295 |
| sl10910 | G0:0006082 | <1e-4 | slr1047  | G0:0051171 | <1e-4 | ssr0102 | G0:0022838 | <1e-4 | slr1468 | G0:0044446 | <1e-4 | slr0106 | G0:0004871 | 0.0295 |
| slr1920 | G0:0001932 | <1e-4 | slr0601  | G0:0046128 | <1e-4 | slr1261 | G0:0022838 | <1e-4 | slr1557 | G0:0005575 | <1e-4 | ssr6099 | G0:0004871 | 0.0295 |
| sl10854 | G0:0016052 | <1e-4 | sl11192  | G0:0009259 | <1e-4 | ssr2998 | G0:0015267 | <1e-4 | ss12807 | G0:0044464 | <1e-4 | slr1142 | G0:0004871 | 0.0295 |
| slr2073 | G0:0009126 | <1e-4 | slr8021  | G0:0052188 | <1e-4 | ssr1407 | G0:0022890 | <1e-4 | sl10802 | G0:0044446 | <1e-4 | slr0498 | G0:0004871 | 0.0295 |
| sl10175 | G0:0044260 | <1e-4 | slr0269  | G0:0071496 | <1e-4 | slr0217 | G0:0022891 | <1e-4 | sl11752 | G0:0044446 | <1e-4 | sl11882 | G0:0004871 | 0.0295 |
| slr0924 | G0:0006733 | <1e-4 | sl11654  | G0:0009263 | <1e-4 | ssr1258 | G0:0015075 | <1e-4 | slr1406 | G0:0043226 | <1e-4 | slr6016 | G0:0004871 | 0.0295 |
| sl17033 | G0:0071496 | <1e-4 | ssr6099  | G0:0044260 | <1e-4 | sl10062 | G0:0016746 | <1e-4 | sl11692 | G0:0044424 | <1e-4 | slr1951 | G0:0004871 | 0.0295 |
| slr1659 | G0:0071842 | <1e-4 | ss11255  | G0:0051716 | <1e-4 | sl10478 | G0:0022892 | <1e-4 | sl10630 | G0:0043226 | <1e-4 | ss10467 | G0:0004871 | 0.0295 |
| sl11766 | G0:0034654 | <1e-4 | ss12064  | G0:0046164 | <1e-4 | sl11304 | G0:0005342 | <1e-4 | sl10272 | G0:0044425 | <1e-4 | ss11300 | G0:0004871 | 0.0295 |
| ss15025 | G0:0044248 | <1e-4 | sl11835  | G0:0009893 | <1e-4 | slr1142 | G0:0022803 | <1e-4 | slr6015 | G0:0044444 | <1e-4 | slr2071 | G0:0004871 | 0.0295 |
| sl10101 | G0:0006576 | <1e-4 | slr0376  | G0:0048519 | <1e-4 | ssr3154 | G0:0016462 | <1e-4 | sl10241 | G0:0005575 | <1e-4 | sl11158 | G0:0004871 | 0.0295 |
| sl10822 | G0:0006732 | <1e-4 | ssr0536  | G0:0044283 | <1e-4 | slr1235 | G0:0022838 | <1e-4 | sl11640 | G0:0005575 | <1e-4 | slr1290 | G0:0004871 | 0.0295 |
| slr1702 | G0:0050801 | <1e-4 | slr0092  | G0:0010556 | <1e-4 | slr2125 | G0:0042623 | <1e-4 | sl11681 | G0:0005575 | <1e-4 | sl11321 | G0:0004871 | 0.0295 |
| slr1258 | G0:0071496 | <1e-4 | sl11250  | G0:0008150 | <1e-4 | slr0168 | G0:0003674 | <1e-4 | sl10449 | G0:0044422 | <1e-4 | slr5112 | G0:0004871 | 0.0295 |
| slr1603 | G0:0034641 | <1e-4 | ssr1155  | G0:0009132 | <1e-4 | ssr5117 | G0:0016818 | <1e-4 | sl10327 | G0:0005575 | <1e-4 | sl11726 | G0:0004871 | 0.0295 |
| slr1307 | G0:0006721 | <1e-4 | slr0505  | G0:0009144 | <1e-4 | slr0651 | G0:0022832 | <1e-4 | ss12069 | G0:0044446 | <1e-4 | sl11373 | G0:0004871 | 0.0295 |
| slr1462 | G0:0006631 | <1e-4 | slr0006  | G0:0051246 | <1e-4 | ssr2439 | G0:0042623 | <1e-4 | sl10141 | G0:0044424 | <1e-4 | slr1816 | G0:0004871 | 0.0295 |
| sl11315 | G0:0009124 | <1e-4 | slr5017  | G0:0019222 | <1e-4 | slr1690 | G0:0043167 | <1e-4 | sl11581 | G0:0044464 | <1e-4 | sl17078 | G0:0004871 | 0.0295 |
| slr0291 | G0:0055086 | <1e-4 | sl11135  | G0:0048523 | <1e-4 | ssr1391 | G0:0016746 | <1e-4 | sl10360 | G0:0043226 | <1e-4 | ss18028 | G0:0004871 | 0.0295 |
| sl11949 | G0:0009260 | <1e-4 | sl11765  | G0:0044282 | <1e-4 | slr0142 | G0:0022832 | <1e-4 | sl11355 | G0:0005575 | <1e-4 | slr6075 | G0:0004871 | 0.0295 |
| slr1209 | G0:0009144 | <1e-4 | sl11950  | G0:0006163 | <1e-4 | slr6068 | G0:0015291 | <1e-4 | slr0039 | G0:0044424 | <1e-4 | ssr7017 | G0:0004871 | 0.0295 |
| sl11241 | G0:0009262 | <1e-4 | slr7102  | G0:0080090 | <1e-4 | sl10905 | G0:0043167 | <1e-4 | slr0348 | G0:0044424 | <1e-4 | sl11652 | G0:0004871 | 0.0295 |
| slr0168 | G0:0016052 | <1e-4 | sl11158  | G0:0050789 | <1e-4 | slr1944 | G0:0022832 | <1e-4 | slr1095 | G0:0044446 | <1e-4 | slr6103 | G0:0004871 | 0.0295 |
| slr0650 | G0:0008150 | <1e-4 | slr0038  | G0:0042451 | <1e-4 | sl10749 | G0:0015293 | <1e-4 | slr0887 | G0:0044464 | <1e-4 | ssr6089 | G0:0004871 | 0.0295 |
| slr1206 | G0:0080090 | <1e-4 | ss12138  | G0:0009309 | <1e-4 | sl10147 | G0:0005342 | <1e-4 | slr7026 | G0:0044422 | <1e-4 | slr0459 | G0:0004871 | 0.0295 |
| slr1674 | G0:0009987 | <1e-4 | sl17090  | G0:0043549 | <1e-4 | slr0712 | G0:0042623 | <1e-4 | ssr1558 | G0:0044424 | <1e-4 | sl10625 | G0:0004871 | 0.0295 |
| slr0787 | G0:0019752 | <1e-4 | slr1670  | G0:0010556 | <1e-4 | ssr8047 | G0:0060089 | <1e-4 | slr8044 | G0:0044446 | <1e-4 | slr1970 | G0:0004871 | 0.0295 |
| sl15032 | G0:0055114 | <1e-4 | sl11461  | G0:0043436 | <1e-4 | slr6104 | G0:0022892 | <1e-4 | sl11193 | G0:0044464 | <1e-4 | sl11380 | G0:0004871 | 0.0295 |
| ssr1552 | G0:0051179 | <1e-4 | slr1495  | G0:0033013 | <1e-4 | slr0059 | G0:0005342 | <1e-4 | slr0655 | G0:0044425 | <1e-4 | slr0637 | G0:0004871 | 0.0295 |
| slr0305 | G0:0071496 | <1e-4 | sl10381  | G0:0016053 | <1e-4 | slr1681 | G0:0015291 | <1e-4 | ssr2422 | G0:0044446 | <1e-4 | slr6033 | G0:0004871 | 0.0295 |
| slr1187 | G0:0009144 | <1e-4 | sl10085  | G0:0051716 | <1e-4 | slr1885 | G0:0043492 | <1e-4 | slr1670 | G0:0044425 | <1e-4 | ssr7035 | G0:0004871 | 0.0295 |
| slr1862 | G0:0009893 | <1e-4 | slr1571  | G0:0051186 | <1e-4 | sl15026 | G0:0043492 | <1e-4 | slr0869 | G0:0044446 | <1e-4 | ssr1041 | G0:0004871 | 0.0295 |
| sl11583 | G0:0034641 | <1e-4 | sl10335  | G0:0042180 | <1e-4 | ssr5011 | G0:0016746 | <1e-4 | sl10238 | G0:0044422 | <1e-4 | sl10563 | G0:0004871 | 0.0295 |

|         |            |       |         |            |       |         |            |       |         |            |       |         |            |        |
|---------|------------|-------|---------|------------|-------|---------|------------|-------|---------|------------|-------|---------|------------|--------|
| sl10577 | G0:0031323 | <1e-4 | ssl0738 | G0:0009144 | <1e-4 | sl10678 | G0:0043167 | <1e-4 | slr1417 | G0:0044422 | <1e-4 | ssl1046 | G0:0004871 | 0.0295 |
| ssl5027 | G0:0006793 | <1e-4 | sl10314 | G0:0006066 | <1e-4 | sl10762 | G0:0043167 | <1e-4 | ssl2749 | G0:0044464 | <1e-4 | slr1406 | G0:0004871 | 0.0295 |
| sl11378 | G0:0046164 | <1e-4 | sl10553 | G0:0065007 | <1e-4 | sl11192 | G0:0022836 | <1e-4 | sl17077 | G0:0044444 | <1e-4 | slr1537 | G0:0004871 | 0.0295 |
| sl10008 | G0:0071840 | <1e-4 | slr7012 | G0:0009161 | <1e-4 | slr1262 | G0:0016817 | <1e-4 | sl10913 | G0:0044422 | <1e-4 | slr2052 | G0:0004871 | 0.0295 |
| slr7011 | G0:0022607 | <1e-4 | slr7010 | G0:0006576 | <1e-4 | sl10497 | G0:0016817 | <1e-4 | slr6013 | G0:0044444 | <1e-4 | sl17031 | G0:0004871 | 0.0295 |
| slr1958 | G0:0009123 | <1e-4 | slr1990 | G0:0044003 | <1e-4 | sl10749 | G0:0016741 | <1e-4 | ssl3379 | G0:0044444 | <1e-4 | slr7094 | G0:0004871 | 0.0295 |
| sl10280 | G0:0010556 | <1e-4 | ssr0759 | G0:0071841 | <1e-4 | sl11086 | G0:0016741 | <1e-4 | slr0723 | G0:0044464 | <1e-4 | sl11151 | G0:0004871 | 0.0295 |
| sl11273 | G0:0051716 | <1e-4 | sl10930 | G0:0019219 | <1e-4 | ssr5074 | G0:0015077 | <1e-4 | slr0589 | G0:0005575 | <1e-4 | ssl7051 | G0:0004871 | 0.0295 |
| slr1187 | G0:0055114 | <1e-4 | sl10242 | G0:0043933 | <1e-4 | slr1262 | G0:0016746 | <1e-4 | ssl2471 | G0:0044422 | <1e-4 | slr0300 | G0:0004871 | 0.0295 |
| slr6090 | G0:0019219 | <1e-4 | ssr2975 | G0:0055086 | <1e-4 | slr6103 | G0:0022857 | <1e-4 | sl11582 | G0:0005575 | <1e-4 | ssl3615 | G0:0004871 | 0.0295 |
| slr1084 | G0:0052188 | <1e-4 | slr0818 | G0:0072528 | <1e-4 | ssr6030 | G0:0022832 | <1e-4 | sl10360 | G0:0044444 | <1e-4 | sl10552 | G0:0004871 | 0.0295 |
| sl10443 | G0:0048523 | <1e-4 | slr0509 | G0:0033013 | <1e-4 | slr0598 | G0:0016746 | <1e-4 | slr1978 | G0:0043226 | <1e-4 | slr7026 | G0:0004871 | 0.0295 |
| ssr3410 | G0:0019637 | <1e-4 | sl10048 | G0:0052188 | <1e-4 | sl10736 | G0:0022857 | <1e-4 | sl10301 | G0:0044424 | <1e-4 | slr0948 | G0:0004871 | 0.0295 |
| sl11285 | G0:0009141 | <1e-4 | sl17066 | G0:0009117 | <1e-4 | slr0948 | G0:0016817 | <1e-4 | sl10281 | G0:0044446 | <1e-4 | slr0516 | G0:0004871 | 0.0295 |
| sl11671 | G0:0051188 | <1e-4 | slr1441 | G0:0006753 | <1e-4 | slr1847 | G0:0016462 | <1e-4 | slr1173 | G0:0044422 | <1e-4 | slr0590 | G0:0004871 | 0.0295 |
| slr1082 | G0:0008610 | <1e-4 | ssr3122 | G0:0009057 | <1e-4 | sl11873 | G0:0015405 | <1e-4 | sl10532 | G0:0044446 | <1e-4 | sl11476 | G0:0004871 | 0.0295 |
| sl10294 | G0:0006811 | <1e-4 | slr1161 | G0:0019752 | <1e-4 | ssr3410 | G0:0043492 | <1e-4 | sl10175 | G0:0044422 | <1e-4 | ssl5008 | G0:0004871 | 0.0295 |
| sl10265 | G0:0046394 | <1e-4 | sl10436 | G0:0051171 | <1e-4 | sl11252 | G0:0022832 | <1e-4 | sl11783 | G0:0044446 | <1e-4 | slr0271 | G0:0004871 | 0.0295 |
| slr7071 | G0:0005996 | <1e-4 | slr2010 | G0:0006811 | <1e-4 | sl10272 | G0:0015291 | <1e-4 | sl10994 | G0:0005575 | <1e-4 | sl10062 | G0:0004871 | 0.0295 |
| slr0147 | G0:0034660 | <1e-4 | slr1142 | G0:0048878 | <1e-4 | ssr2318 | G0:0015291 | <1e-4 | sl11652 | G0:0044464 | <1e-4 | slr5087 | G0:0004871 | 0.0295 |
| slr0964 | G0:0043170 | <1e-4 | sl10216 | G0:0009150 | <1e-4 | sl10590 | G0:0005342 | <1e-4 | ssr3341 | G0:0005575 | <1e-4 | sl11911 | G0:0004871 | 0.0295 |
| sl11318 | G0:0046483 | <1e-4 | sl11692 | G0:0006163 | <1e-4 | sl11835 | G0:0022836 | <1e-4 | slr1659 | G0:0043226 | <1e-4 | sl10230 | G0:0004871 | 0.0295 |
| slr1462 | G0:0009126 | <1e-4 | sl10175 | G0:0009161 | <1e-4 | sl11262 | G0:0022891 | <1e-4 | slr0702 | G0:0044446 | <1e-4 | slr6088 | G0:0004871 | 0.0295 |
| slr1128 | G0:0080090 | <1e-4 | sl11954 | G0:0045184 | <1e-4 | ssr8013 | G0:0015075 | <1e-4 | ssr0761 | G0:0044446 | <1e-4 | sl11926 | G0:0004871 | 0.0295 |
| ssl2814 | G0:0006082 | <1e-4 | ssr2998 | G0:0048519 | <1e-4 | slr0300 | G0:0022891 | <1e-4 | slr0967 | G0:0005575 | <1e-4 | sl10162 | G0:0004871 | 0.0295 |
| slr7099 | G0:0080090 | <1e-4 | sl10860 | G0:0009150 | <1e-4 | slr2052 | G0:0022891 | <1e-4 | sl18004 | G0:0005575 | <1e-4 | ssl5103 | G0:0004871 | 0.0295 |
| slr1932 | G0:0071840 | <1e-4 | ssr2962 | G0:0044260 | <1e-4 | sl10623 | G0:0022890 | <1e-4 | slr1391 | G0:0044444 | <1e-4 | slr1886 | G0:0004871 | 0.0295 |
| sl10266 | G0:0034660 | <1e-4 | ssl2717 | G0:0009161 | <1e-4 | sl11714 | G0:0015267 | <1e-4 | sl15062 | G0:0044464 | <1e-4 | sl11068 | G0:0004871 | 0.0295 |
| sl10913 | G0:0009161 | <1e-4 | slr0765 | G0:0044248 | <1e-4 | slr0408 | G0:0022832 | <1e-4 | slr0582 | G0:0044422 | <1e-4 | sl11049 | G0:0004871 | 0.0295 |
| sl15097 | G0:0043436 | <1e-4 | ssl1552 | G0:0009308 | <1e-4 | slr0780 | G0:0022892 | <1e-4 | slr1062 | G0:0044422 | <1e-4 | sl11640 | G0:0004871 | 0.0295 |
| slr0815 | G0:0071841 | <1e-4 | sl17065 | G0:0006082 | <1e-4 | sl11174 | G0:0022891 | <1e-4 | slr1240 | G0:0005575 | <1e-4 | slr6104 | G0:0004871 | 0.0295 |
| sl10176 | G0:0019637 | <1e-4 | sl15069 | G0:0009987 | <1e-4 | slr1789 | G0:0022838 | <1e-4 | ssl0312 | G0:0043226 | <1e-4 | slr5077 | G0:0004871 | 0.0295 |
| sl11225 | G0:0006066 | <1e-4 | slr1917 | G0:0043412 | <1e-4 | slr1391 | G0:0016746 | <1e-4 | sl15089 | G0:0044422 | <1e-4 | sl15089 | G0:0004871 | 0.0295 |
| slr1493 | G0:0006220 | <1e-4 | sl10280 | G0:0009987 | <1e-4 | sl12015 | G0:0016741 | <1e-4 | slr1627 | G0:0005575 | <1e-4 | slr5101 | G0:0004871 | 0.0295 |
| sl10735 | G0:0009893 | <1e-4 | slr0637 | G0:0051171 | <1e-4 | sl11086 | G0:0016462 | <1e-4 | slr0976 | G0:0043226 | <1e-4 | slr0885 | G0:0004871 | 0.0295 |
| slr1142 | G0:0044255 | <1e-4 | slr1752 | G0:0051246 | <1e-4 | slr0670 | G0:0008171 | <1e-4 | slr1573 | G0:0044446 | <1e-4 | sl11495 | G0:0004871 | 0.0295 |
| slr5127 | G0:0090304 | <1e-4 | slr1301 | G0:0034660 | <1e-4 | sl10068 | G0:0022891 | <1e-4 | slr1087 | G0:0044446 | <1e-4 | sl11340 | G0:0004871 | 0.0295 |
| slr0613 | G0:0009165 | <1e-4 | sl10048 | G0:0051347 | <1e-4 | sl10296 | G0:0015267 | <1e-4 | ssl0738 | G0:0044446 | <1e-4 | ssl1552 | G0:0004871 | 0.0295 |
| slr0196 | G0:0044248 | <1e-4 | sl11151 | G0:0046907 | <1e-4 | slr1799 | G0:0003674 | <1e-4 | sl10609 | G0:0044425 | <1e-4 | sl10249 | G0:0004871 | 0.0295 |
| ssr1765 | G0:0050789 | <1e-4 | slr0935 | G0:0009056 | <1e-4 | sl10860 | G0:0015293 | <1e-4 | ssl1255 | G0:0044446 | <1e-4 | sl17089 | G0:0004871 | 0.0295 |
| slr1636 | G0:0043933 | <1e-4 | slr1127 | G0:0010468 | <1e-4 | slr0848 | G0:0022857 | <1e-4 | slr1875 | G0:0044424 | <1e-4 | ssl8039 | G0:0004871 | 0.0295 |
| slr0393 | G0:0055114 | <1e-4 | sl10584 | G0:0071842 | <1e-4 | sl11954 | G0:0022891 | <1e-4 | sl10985 | G0:0044444 | <1e-4 | slr1911 | G0:0004871 | 0.0295 |
| slr1613 | G0:0006732 | <1e-4 | slr0270 | G0:0016053 | <1e-4 | slr0730 | G0:0060089 | <1e-4 | sl10787 | G0:0044444 | <1e-4 | slr0625 | G0:0004871 | 0.0295 |
| sl10997 | G0:0006576 | <1e-4 | slr1406 | G0:0043436 | <1e-4 | ssr3341 | G0:0016818 | <1e-4 | slr0112 | G0:0005575 | <1e-4 | slr2103 | G0:0004871 | 0.0295 |
| sl15128 | G0:0009161 | <1e-4 | sl10482 | G0:0043412 | <1e-4 | sl10552 | G0:0008171 | <1e-4 | slr0341 | G0:0043226 | <1e-4 | slr1875 | G0:0004871 | 0.0295 |
| slr2000 | G0:0043933 | <1e-4 | slr0924 | G0:0048878 | <1e-4 | slr1767 | G0:0022836 | <1e-4 | slr5116 | G0:0005575 | <1e-4 | slr1577 | G0:0004871 | 0.0295 |
| slr0586 | G0:0043436 | <1e-4 | slr1636 | G0:0006811 | <1e-4 | slr1533 | G0:0043167 | <1e-4 | slr1958 | G0:0044464 | <1e-4 | ssl1378 | G0:0004871 | 0.0295 |
| slr0885 | G0:0019751 | <1e-4 | sl10293 | G0:0052188 | <1e-4 | slr0503 | G0:0003674 | <1e-4 | sl15062 | G0:0044424 | <1e-4 | slr1327 | G0:0004871 | 0.0295 |
| ssr2843 | G0:0046164 | <1e-4 | sl10858 | G0:0009126 | <1e-4 | sl11225 | G0:0015075 | <1e-4 | sl11832 | G0:0044425 | <1e-4 | ssl5091 | G0:0004871 | 0.0295 |
| sl17063 | G0:0051171 | <1e-4 | sl10167 | G0:0050794 | <1e-4 | slr1648 | G0:0015291 | <1e-4 | ssr1155 | G0:0005575 | <1e-4 | ssl7039 | G0:0004871 | 0.0295 |
| sl11040 | G0:0034654 | <1e-4 | sl11186 | G0:0033013 | <1e-4 | slr5127 | G0:0022857 | <1e-4 | sg10001 | G0:0044464 | <1e-4 | ssl5100 | G0:0004871 | 0.0295 |
| slr1590 | G0:0050789 | <1e-4 | ssr6020 | G0:0010468 | <1e-4 | slr0455 | G0:0016741 | <1e-4 | slr1547 | G0:0044464 | <1e-4 | slr5102 | G0:0004871 | 0.0295 |
| sl10508 | G0:0051347 | <1e-4 | slr1056 | G0:0043412 | <1e-4 | ssr1258 | G0:0022891 | <1e-4 | ssr6019 | G0:0044464 | <1e-4 | slr2070 | G0:0004871 | 0.0295 |
| sl10369 | G0:0009144 | <1e-4 | slr0610 | G0:0042180 | <1e-4 | slr1079 | G0:0015293 | <1e-4 | sl10394 | G0:0044446 | <1e-4 | ssr7084 | G0:0004871 | 0.0295 |

|         |            |       |         |            |       |         |            |       |         |            |       |          |            |        |
|---------|------------|-------|---------|------------|-------|---------|------------|-------|---------|------------|-------|----------|------------|--------|
| sl10913 | G0:0019222 | <1e-4 | sl11158 | G0:0080090 | <1e-4 | sl11350 | G0:0043167 | <1e-4 | ssr2972 | G0:0005575 | <1e-4 | slr5073  | G0:0004871 | 0.0295 |
| slr0386 | G0:0009150 | <1e-4 | slr1183 | G0:0016054 | <1e-4 | sl11217 | G0:0003674 | <1e-4 | ssr1425 | G0:0044422 | <1e-4 | ssr3402  | G0:0004871 | 0.0295 |
| sl11552 | G0:0051716 | <1e-4 | ssr2333 | G0:0046128 | <1e-4 | ssr5121 | G0:0043492 | <1e-4 | ssr5120 | G0:0043226 | <1e-4 | slr7057  | G0:0004871 | 0.0295 |
| ssr3570 | G0:0009132 | <1e-4 | sl11022 | G0:0060255 | <1e-4 | sl11002 | G0:0022890 | <1e-4 | sl10539 | G0:0044425 | <1e-4 | slr0587  | G0:0004871 | 0.0295 |
| slr5017 | G0:0060255 | <1e-4 | slr1223 | G0:0042451 | <1e-4 | sl11891 | G0:0015077 | <1e-4 | sl10242 | G0:0005575 | <1e-4 | slr6045  | G0:0004871 | 0.0295 |
| sl11160 | G0:0043170 | <1e-4 | slr0341 | G0:0048518 | <1e-4 | slr1258 | G0:0005342 | <1e-4 | sl17047 | G0:0043226 | <1e-4 | sl10984  | G0:0004871 | 0.0295 |
| sl10218 | G0:0043549 | <1e-4 | sl11265 | G0:0046907 | <1e-4 | sl11201 | G0:0022838 | <1e-4 | slr0333 | G0:0044425 | <1e-4 | ssr0657  | G0:0004871 | 0.0295 |
| sl10442 | G0:0048522 | <1e-4 | sl11691 | G0:0050789 | <1e-4 | slr0751 | G0:0022891 | <1e-4 | slr7081 | G0:0044444 | <1e-4 | sl10875  | G0:0004871 | 0.0295 |
| sl11652 | G0:0042180 | <1e-4 | slr1025 | G0:0009308 | <1e-4 | slr1896 | G0:0022891 | <1e-4 | sl10157 | G0:0044422 | <1e-4 | slr1599  | G0:0004871 | 0.0295 |
| sl16055 | G0:0048523 | <1e-4 | slr2118 | G0:0048878 | <1e-4 | slr0356 | G0:0022892 | <1e-4 | slr1790 | G0:0043226 | <1e-4 | slr1163  | G0:0004871 | 0.0295 |
| sl11541 | G0:0050801 | <1e-4 | slr0586 | G0:0033013 | <1e-4 | sl10498 | G0:0016462 | <1e-4 | slr5077 | G0:0044464 | <1e-4 | slr0241  | G0:0004871 | 0.0295 |
| ssr6083 | G0:0046128 | <1e-4 | slr0709 | G0:0006220 | <1e-4 | sl11089 | G0:0015267 | <1e-4 | slr7057 | G0:0043226 | <1e-4 | slr8022  | G0:0004871 | 0.0295 |
| ssr1528 | G0:0044260 | <1e-4 | ssr0102 | G0:0042455 | <1e-4 | sl11632 | G0:0016462 | <1e-4 | slr1437 | G0:0044444 | <1e-4 | ssr2047  | G0:0004871 | 0.0295 |
| slr0575 | G0:0071841 | <1e-4 | sl10413 | G0:0022607 | <1e-4 | slr6101 | G0:0022832 | <1e-4 | slr0207 | G0:0005575 | <1e-4 | sl10101  | G0:0004871 | 0.0295 |
| sl10763 | G0:0046483 | <1e-4 | sl11950 | G0:0016053 | <1e-4 | ssr3467 | G0:0022892 | <1e-4 | ssr6020 | G0:0044444 | <1e-4 | sl11898  | G0:0004871 | 0.0295 |
| ssr6027 | G0:0043412 | <1e-4 | ssr1155 | G0:0051171 | <1e-4 | sl10981 | G0:0043167 | <1e-4 | ss18003 | G0:0044464 | <1e-4 | slr5012  | G0:0004871 | 0.0295 |
| sl11389 | G0:0019222 | <1e-4 | sl11239 | G0:0001932 | <1e-4 | slr0496 | G0:0008171 | <1e-4 | sl18019 | G0:0044422 | <1e-4 | ssr2975  | G0:0004871 | 0.0295 |
| sl11573 | G0:0009142 | <1e-4 | slr7024 | G0:0046128 | <1e-4 | sl10481 | G0:0022836 | <1e-4 | slr0954 | G0:0044464 | <1e-4 | slr0865  | G0:0004871 | 0.0295 |
| slr1436 | G0:0006220 | <1e-4 | slr1045 | G0:0019222 | <1e-4 | slr0423 | G0:0016817 | <1e-4 | slr0521 | G0:0005575 | <1e-4 | ssr1425  | G0:0004871 | 0.0295 |
| sl15130 | G0:0046164 | <1e-4 | ss15114 | G0:0051716 | <1e-4 | sl11979 | G0:0022892 | <1e-4 | slr1307 | G0:0005575 | <1e-4 | slr0634  | G0:0004871 | 0.0295 |
| slr6101 | G0:0051188 | <1e-4 | slr6013 | G0:0009394 | <1e-4 | ssr3402 | G0:0022890 | <1e-4 | sl10218 | G0:0043226 | <1e-4 | slr6029  | G0:0004871 | 0.0295 |
| sl11784 | G0:0009117 | <1e-4 | slr0364 | G0:0009117 | <1e-4 | slr1911 | G0:0015291 | <1e-4 | ss15096 | G0:0044425 | <1e-4 | sl15004  | G0:0004871 | 0.0295 |
| slr0392 | G0:0009394 | <1e-4 | slr1915 | G0:0050801 | <1e-4 | slr1627 | G0:0016818 | <1e-4 | slr2012 | G0:0043226 | <1e-4 | sl18011  | G0:0004871 | 0.0295 |
| slr1128 | G0:0008150 | <1e-4 | sl11061 | G0:0016054 | <1e-4 | slr1222 | G0:0005342 | <1e-4 | ssr3304 | G0:0044444 | <1e-4 | sl11784  | G0:0004871 | 0.0295 |
| sl11162 | G0:0008150 | <1e-4 | sl11611 | G0:0019637 | <1e-4 | slr2060 | G0:0015077 | <1e-4 | sl10007 | G0:0043226 | <1e-4 | sl11089  | G0:0004871 | 0.0295 |
| sl18011 | G0:0051234 | <1e-4 | slr1923 | G0:0009161 | <1e-4 | slr1084 | G0:0022838 | <1e-4 | sl10783 | G0:0044444 | <1e-4 | slr1624  | G0:0004871 | 0.0295 |
| sl10189 | G0:0019637 | <1e-4 | slr0104 | G0:0044106 | <1e-4 | ssr2711 | G0:0015399 | <1e-4 | sl10446 | G0:0005575 | <1e-4 | sl17086  | G0:0004871 | 0.0295 |
| slr1541 | G0:0080090 | <1e-4 | ssr2047 | G0:0046907 | <1e-4 | sl11004 | G0:0015293 | <1e-4 | ssr6046 | G0:0043226 | <1e-4 | sl17028  | G0:0004871 | 0.0295 |
| ssr6003 | G0:0006811 | <1e-4 | sl18035 | G0:0009141 | <1e-4 | sl11906 | G0:0003674 | <1e-4 | slr7092 | G0:0044424 | <1e-4 | slr5037  | G0:0004871 | 0.0295 |
| ssr3532 | G0:0016053 | <1e-4 | sl10639 | G0:0051818 | <1e-4 | sl11250 | G0:0003674 | <1e-4 | slr1170 | G0:0044444 | <1e-4 | slr7100  | G0:0004871 | 0.0295 |
| ssr6026 | G0:0019219 | <1e-4 | slr1484 | G0:0048519 | <1e-4 | slr1970 | G0:0022892 | <1e-4 | slr1122 | G0:0044424 | <1e-4 | slr6081  | G0:0004871 | 0.0295 |
| slr7012 | G0:0051171 | <1e-4 | sl10096 | G0:0072524 | <1e-4 | ss15008 | G0:0015267 | <1e-4 | slr6064 | G0:0044422 | <1e-4 | sl10293  | G0:0016820 | 0.0291 |
| slr0602 | G0:0006631 | <1e-4 | slr6044 | G0:0009394 | <1e-4 | slr1990 | G0:0042623 | <1e-4 | ssr6062 | G0:0044424 | <1e-4 | sl10863  | G0:0016820 | 0.0291 |
| slr0453 | G0:0050801 | <1e-4 | slr0890 | G0:0006091 | <1e-4 | slr2038 | G0:0015399 | <1e-4 | sl10923 | G0:0043226 | <1e-4 | sl10846  | G0:0016820 | 0.0291 |
| ssr0692 | G0:0009987 | <1e-4 | slr6103 | G0:0019637 | <1e-4 | sl11542 | G0:0042623 | <1e-4 | slr1102 | G0:0044446 | <1e-4 | ssr0332  | G0:0016820 | 0.0291 |
| slr5013 | G0:0019222 | <1e-4 | ssr3571 | G0:0009057 | <1e-4 | slr1098 | G0:0005342 | <1e-4 | sl11024 | G0:0043226 | <1e-4 | slr1095  | G0:0016820 | 0.0291 |
| slr0060 | G0:0065007 | <1e-4 | sl10780 | G0:0044260 | <1e-4 | ssr8013 | G0:0043492 | <1e-4 | ss13549 | G0:0044424 | <1e-4 | sl18032  | G0:0016820 | 0.0291 |
| slr0909 | G0:0044106 | <1e-4 | sl11262 | G0:0008150 | <1e-4 | slr6080 | G0:0015077 | <1e-4 | sl17029 | G0:0044424 | <1e-4 | ssr5120  | G0:0016820 | 0.0291 |
| slr0709 | G0:0033013 | <1e-4 | slr6106 | G0:0009161 | <1e-4 | slr7014 | G0:0022838 | <1e-4 | slr1215 | G0:0044425 | <1e-4 | sl10518  | G0:0016820 | 0.0291 |
| ss13291 | G0:0009308 | <1e-4 | slr0755 | G0:0052188 | <1e-4 | slr0109 | G0:0015405 | <1e-4 | sl10412 | G0:0044444 | <1e-4 | sl11155  | G0:0016820 | 0.0291 |
| slr2111 | G0:0009123 | <1e-4 | slr0453 | G0:0019362 | <1e-4 | sl11272 | G0:0016746 | <1e-4 | slr1570 | G0:0044446 | <1e-4 | sl10860  | G0:0016820 | 0.0291 |
| slr1568 | G0:0042455 | <1e-4 | sl10424 | G0:0006721 | <1e-4 | slr8021 | G0:0022803 | <1e-4 | sl11942 | G0:0044444 | <1e-4 | sl117043 | G0:0016820 | 0.0291 |
| sl10481 | G0:0009124 | <1e-4 | sl11461 | G0:0006793 | <1e-4 | slr2049 | G0:0022803 | <1e-4 | sl11455 | G0:0044424 | <1e-4 | slr0262  | G0:0016820 | 0.0291 |
| sl11954 | G0:0019222 | <1e-4 | slr1999 | G0:0042180 | <1e-4 | ss13549 | G0:0016818 | <1e-4 | slr1210 | G0:0044424 | <1e-4 | ss12717  | G0:0016820 | 0.0291 |
| sl10762 | G0:0042180 | <1e-4 | slr2125 | G0:0006720 | <1e-4 | slr1813 | G0:0015405 | <1e-4 | slr6004 | G0:0005575 | <1e-4 | ss13451  | G0:0016820 | 0.0291 |
| sl11542 | G0:0055114 | <1e-4 | ssr7093 | G0:0051234 | <1e-4 | slr2011 | G0:0060089 | <1e-4 | slr8022 | G0:0044422 | <1e-4 | ss10312  | G0:0016820 | 0.0291 |
| ssr6026 | G0:0080090 | <1e-4 | slr1203 | G0:0019222 | <1e-4 | sl10102 | G0:0015293 | <1e-4 | slr0299 | G0:0043226 | <1e-4 | slr1546  | G0:0016820 | 0.0291 |
| sgl0001 | G0:0019219 | <1e-4 | slr1773 | G0:0001932 | <1e-4 | sl11512 | G0:0016746 | <1e-4 | sl11399 | G0:0005575 | <1e-4 | ssr1951  | G0:0016820 | 0.0291 |
| slr1657 | G0:0050794 | <1e-4 | sl11273 | G0:0044281 | <1e-4 | ssr3402 | G0:0022838 | <1e-4 | sl10982 | G0:0043226 | <1e-4 | slr1813  | G0:0016820 | 0.0291 |
| slr1800 | G0:0009987 | <1e-4 | slr1920 | G0:0009893 | <1e-4 | sl11884 | G0:0022857 | <1e-4 | ssr5020 | G0:0005575 | <1e-4 | slr0038  | G0:0016820 | 0.0291 |
| ss13451 | G0:0009259 | <1e-4 | sl11191 | G0:0043412 | <1e-4 | slr1053 | G0:0015291 | <1e-4 | sl15032 | G0:0005575 | <1e-4 | slr0569  | G0:0016820 | 0.0291 |
| slr6016 | G0:0043648 | <1e-4 | ssr6085 | G0:0006220 | <1e-4 | slr1613 | G0:0043167 | <1e-4 | slr6087 | G0:0044464 | <1e-4 | slr2105  | G0:0016820 | 0.0291 |
| slr2038 | G0:0051171 | <1e-4 | ssr7084 | G0:0044003 | <1e-4 | sl10168 | G0:0022836 | <1e-4 | ssr7084 | G0:0044464 | <1e-4 | slr2119  | G0:0016820 | 0.0291 |
| slr1396 | G0:0048523 | <1e-4 | slr1306 | G0:0044106 | <1e-4 | slr1406 | G0:0015291 | <1e-4 | sl10218 | G0:0044422 | <1e-4 | slr1068  | G0:0016820 | 0.0291 |

slr1864 G0:0009893 <1e-4 s115130 G0:0006793 <1e-4 slr0337 G0:0043492 <1e-4 s110670 G0:0044464 <1e-4 slr2118 G0:0016820 0.0291  
s110350 G0:0042180 <1e-4 s110888 G0:0010468 <1e-4 slr1025 G0:0015399 <1e-4 slr0981 G0:0044424 <1e-4 s116054 G0:0016820 0.0291  
slr1276 G0:0005996 <1e-4 slr1263 G0:0052188 <1e-4 s110242 G0:0016462 <1e-4 slr1419 G0:0044424 <1e-4 s110803 G0:0016820 0.0291  
s111542 G0:0034641 <1e-4 s111262 G0:0009165 <1e-4 s111307 G0:0022857 <1e-4 slr6045 G0:0044444 <1e-4 slr0168 G0:0016820 0.0291  
slr1384 G0:0043549 <1e-4 slr0334 G0:0046394 <1e-4 s111174 G0:0022890 <1e-4 s115128 G0:0044444 <1e-4 slr1263 G0:0016820 0.0291  
s111191 G0:0019752 <1e-4 slr2048 G0:0051347 <1e-4 slr1636 G0:0022836 <1e-4 s110243 G0:0005575 <1e-4 s110102 G0:0016820 0.0291  
s118012 G0:0043412 <1e-4 s110815 G0:0010468 <1e-4 slr2115 G0:0015399 <1e-4 s112384 G0:0043226 <1e-4 slr0388 G0:0016820 0.0291  
ssl2162 G0:0019752 <1e-4 s117069 G0:0043648 <1e-4 slr1442 G0:0016741 <1e-4 s112814 G0:0043226 <1e-4 slr1104 G0:0016820 0.0291  
slr6106 G0:0022411 <1e-4 s111751 G0:0051179 <1e-4 slr1495 G0:0015291 <1e-4 s110149 G0:0044444 <1e-4 slr1484 G0:0016820 0.0291  
s111752 G0:0050794 <1e-4 s111830 G0:0031326 <1e-4 slr1194 G0:0042623 <1e-4 slr6049 G0:0044444 <1e-4 s111769 G0:0016820 0.0291  
slr0581 G0:0048878 <1e-4 slr7060 G0:0051234 <1e-4 s112807 G0:0060089 <1e-4 s110779 G0:0044464 <1e-4 s112422 G0:0016820 0.0291  
s111372 G0:0009123 <1e-4 s110483 G0:0006766 <1e-4 slr2011 G0:0022803 <1e-4 s111174 G0:0043226 <1e-4 slr1864 G0:0016820 0.0291  
ssl3549 G0:0006733 <1e-4 s118019 G0:0022411 <1e-4 slr0907 G0:0022838 <1e-4 s110858 G0:0044422 <1e-4 slr0380 G0:0016820 0.0291  
ssl2064 G0:0051347 <1e-4 s111155 G0:0009259 <1e-4 slr1644 G0:0015291 <1e-4 slr1885 G0:0043226 <1e-4 slr1576 G0:0016820 0.0291  
s111006 G0:0009263 <1e-4 s115091 G0:0051716 <1e-4 s115061 G0:0015077 <1e-4 slr0232 G0:0044422 <1e-4 s111004 G0:0016820 0.0291  
s110436 G0:0009987 <1e-4 s117042 G0:0044260 <1e-4 slr1052 G0:0060089 <1e-4 slr2011 G0:0005575 <1e-4 s110611 G0:0016820 0.0291  
slr2084 G0:0044003 <1e-4 s110669 G0:0051179 <1e-4 s110298 G0:0043492 <1e-4 slr0305 G0:0044444 <1e-4 s110886 G0:0016820 0.0291  
slr0919 G0:0005996 <1e-4 slr0872 G0:0009309 <1e-4 s111378 G0:0016462 <1e-4 s111692 G0:0044464 <1e-4 slr5116 G0:0016820 0.0291  
s110096 G0:0048878 <1e-4 slr1196 G0:0019752 <1e-4 s115062 G0:0005342 <1e-4 slr0505 G0:0044464 <1e-4 s115096 G0:0016820 0.0291  
s111049 G0:0006066 <1e-4 slr0592 G0:0051818 <1e-4 slr1648 G0:0022836 <1e-4 s111581 G0:0043226 <1e-4 s115032 G0:0016820 0.0291  
slr1023 G0:0071496 <1e-4 s115003 G0:0022607 <1e-4 s111304 G0:0022857 <1e-4 slr1913 G0:0043226 <1e-4 s110710 G0:0016820 0.0291  
ssr3402 G0:0044271 <1e-4 slr7057 G0:0009199 <1e-4 slr1951 G0:0015405 <1e-4 slr1590 G0:0044422 <1e-4 slr6090 G0:0016820 0.0291  
s118012 G0:0043436 <1e-4 slr2025 G0:0009889 <1e-4 slr0509 G0:0015293 <1e-4 s117051 G0:0043226 <1e-4 s117046 G0:0016820 0.0291  
s111866 G0:0006753 <1e-4 s115062 G0:0051818 <1e-4 slr1847 G0:0003674 <1e-4 s111613 G0:0044444 <1e-4 slr1619 G0:0016820 0.0291  
s111318 G0:0009117 <1e-4 s111262 G0:0009893 <1e-4 s110858 G0:0043492 <1e-4 slr0914 G0:0044444 <1e-4 s111853 G0:0016820 0.0291  
slr1847 G0:0006091 <1e-4 s115092 G0:0072521 <1e-4 s110483 G0:0022836 <1e-4 s110272 G0:0044422 <1e-4 s110872 G0:0016820 0.0291  
s111174 G0:0006733 <1e-4 s110905 G0:0043648 <1e-4 slr5023 G0:0022857 <1e-4 s115096 G0:0043226 <1e-4 s110762 G0:0016820 0.0291  
ssr6089 G0:0046394 <1e-4 s111979 G0:0043648 <1e-4 s118013 G0:0008171 <1e-4 s111698 G0:0044425 <1e-4 s116032 G0:0016820 0.0291  
s110670 G0:0048518 <1e-4 slr0610 G0:0044281 <1e-4 slr0975 G0:0060089 <1e-4 s110298 G0:0043226 <1e-4 s115090 G0:0016820 0.0291  
s111797 G0:0009199 <1e-4 slr2027 G0:0043412 <1e-4 slr6006 G0:0016462 <1e-4 slr0211 G0:0044464 <1e-4 s116020 G0:0016820 0.0291  
slr0364 G0:0006811 <1e-4 s111151 G0:0052188 <1e-4 s115062 G0:0015405 <1e-4 s110044 G0:0005575 <1e-4 s110167 G0:0016820 0.0291  
slr1103 G0:0009144 <1e-4 s111359 G0:0006793 <1e-4 s111541 G0:0022803 <1e-4 slr1917 G0:0044425 <1e-4 s111906 G0:0016820 0.0291  
slr0650 G0:0051818 <1e-4 slr0755 G0:0044003 <1e-4 slr1911 G0:0022892 <1e-4 s110862 G0:0005575 <1e-4 s111109 G0:0016820 0.0291  
slr0962 G0:0031323 <1e-4 s116055 G0:0046164 <1e-4 slr2038 G0:0003674 <1e-4 s111378 G0:0043226 <1e-4 slr0337 G0:0016820 0.0291  
slr1287 G0:0055114 <1e-4 slr0092 G0:0071496 <1e-4 slr7095 G0:0016817 <1e-4 s111352 G0:0044422 <1e-4 slr1103 G0:0016820 0.0291  
s110910 G0:0009199 <1e-4 slr1977 G0:0046394 <1e-4 s110456 G0:0016741 <1e-4 slr1593 G0:0005575 <1e-4 slr0059 G0:0016820 0.0291  
slr0602 G0:0043648 <1e-4 slr0243 G0:0009199 <1e-4 s111761 G0:0043167 <1e-4 s112803 G0:0005575 <1e-4 s112013 G0:0016820 0.0291  
slr1431 G0:0006631 <1e-4 slr1438 G0:0033013 <1e-4 s111654 G0:0060089 <1e-4 s115034 G0:0005575 <1e-4 slr1168 G0:0016820 0.0291  
slr1875 G0:0010468 <1e-4 slr7058 G0:0019222 <1e-4 slr1236 G0:0015075 <1e-4 slr0204 G0:0044444 <1e-4 s113410 G0:0016820 0.0291  
s111921 G0:0001932 <1e-4 slr1915 G0:0090304 <1e-4 s111389 G0:0042623 <1e-4 s111730 G0:0044444 <1e-4 s110176 G0:0016820 0.0291  
s111265 G0:0044003 <1e-4 slr0192 G0:0006082 <1e-4 s111634 G0:0060089 <1e-4 s111166 G0:0044444 <1e-4 slr7025 G0:0016820 0.0291  
s110804 G0:0010556 <1e-4 s110218 G0:0008610 <1e-4 slr1397 G0:0016817 <1e-4 slr0959 G0:0044422 <1e-4 s111273 G0:0016820 0.0291  
s111601 G0:0019362 <1e-4 s110822 G0:0044248 <1e-4 s111307 G0:0016818 <1e-4 slr1260 G0:0005575 <1e-4 s110630 G0:0016820 0.0291  
slr6074 G0:0019222 <1e-4 s110839 G0:0009309 <1e-4 s111923 G0:0042623 <1e-4 slr1852 G0:0044422 <1e-4 s111160 G0:0016820 0.0291  
slr1287 G0:0009262 <1e-4 s110656 G0:0009056 <1e-4 s117069 G0:0015075 <1e-4 slr6007 G0:0044422 <1e-4 slr1956 G0:0016820 0.0291  
s111411 G0:0009141 <1e-4 s110294 G0:0065007 <1e-4 slr0667 G0:0043167 <1e-4 slr0575 G0:0043226 <1e-4 s115026 G0:0016820 0.0291  
ssl1378 G0:0048518 <1e-4 slr0692 G0:0019222 <1e-4 slr1990 G0:0015293 <1e-4 slr1944 G0:0005575 <1e-4 s113379 G0:0016820 0.0291  
s111071 G0:0060255 <1e-4 s112754 G0:0046907 <1e-4 slr1353 G0:0022836 <1e-4 slr1998 G0:0044425 <1e-4 s117047 G0:0016820 0.0291  
ssl2749 G0:0009987 <1e-4 slr1790 G0:0016053 <1e-4 slr6088 G0:0015399 <1e-4 slr0480 G0:0044422 <1e-4 s111766 G0:0016820 0.0291  
slr1188 G0:0019751 <1e-4 slr0318 G0:0046164 <1e-4 s110350 G0:0015077 <1e-4 slr1079 G0:0044444 <1e-4 slr0552 G0:0016820 0.0291  
slr0059 G0:0072522 <1e-4 slr0702 G0:0071842 <1e-4 s118035 G0:0022803 <1e-4 s111830 G0:0044444 <1e-4 s111961 G0:0016820 0.0291  
slr1570 G0:0019637 <1e-4 slr2048 G0:0009165 <1e-4 s111155 G0:0016818 <1e-4 s111350 G0:0044444 <1e-4 s113341 G0:0016820 0.0291  
slr0924 G0:0051818 <1e-4 slr1263 G0:0009124 <1e-4 slr1187 G0:0022857 <1e-4 s118027 G0:0044444 <1e-4 slr7096 G0:0016820 0.0291  
slr0656 G0:0051246 <1e-4 s118005 G0:0043549 <1e-4 s110410 G0:0016818 <1e-4 s111488 G0:0044422 <1e-4 s111355 G0:0016820 0.0291

|         |            |       |         |            |       |         |            |       |         |            |       |         |            |        |
|---------|------------|-------|---------|------------|-------|---------|------------|-------|---------|------------|-------|---------|------------|--------|
| ssr1155 | G0:0009124 | <1e-4 | ssr2975 | G0:0008150 | <1e-4 | ss12971 | G0:0022838 | <1e-4 | slr0914 | G0:0005575 | <1e-4 | sl11773 | G0:0016820 | 0.0291 |
| slr0801 | G0:0019752 | <1e-4 | ssr5019 | G0:0071840 | <1e-4 | slr0587 | G0:0015075 | <1e-4 | sl18012 | G0:0044446 | <1e-4 | slr0195 | G0:0016820 | 0.0291 |
| sl17077 | G0:0009262 | <1e-4 | sl11424 | G0:0006811 | <1e-4 | ss12595 | G0:0060089 | <1e-4 | slr6050 | G0:0044424 | <1e-4 | sl11884 | G0:0016820 | 0.0291 |
| sl11656 | G0:0019751 | <1e-4 | slr1230 | G0:0016053 | <1e-4 | ss10483 | G0:0015291 | <1e-4 | ssr2067 | G0:0044424 | <1e-4 | sl15006 | G0:0016820 | 0.0291 |
| slr0848 | G0:0072522 | <1e-4 | sl10913 | G0:0044260 | <1e-4 | sl11531 | G0:0042623 | <1e-4 | sl10909 | G0:0044425 | <1e-4 | sl15034 | G0:0016820 | 0.0291 |
| sl11510 | G0:0051186 | <1e-4 | slr0551 | G0:0009262 | <1e-4 | sl11060 | G0:0015291 | <1e-4 | slr1127 | G0:0044444 | <1e-4 | sl10328 | G0:0016820 | 0.0291 |
| ssr6002 | G0:0009394 | <1e-4 | slr0553 | G0:0009059 | <1e-4 | sl11321 | G0:0016741 | <1e-4 | sl11247 | G0:0044464 | <1e-4 | slr6013 | G0:0016820 | 0.0291 |
| sl10394 | G0:0031323 | <1e-4 | ssr6078 | G0:0044248 | <1e-4 | ssr1528 | G0:0016818 | <1e-4 | sl10658 | G0:0044424 | <1e-4 | slr1407 | G0:0016820 | 0.0291 |
| sl11912 | G0:0051179 | <1e-4 | sl11222 | G0:0009161 | <1e-4 | sl10913 | G0:0016462 | <1e-4 | slr1107 | G0:0044422 | <1e-4 | sl11764 | G0:0016820 | 0.0291 |
| sl10280 | G0:0044248 | <1e-4 | ssr5121 | G0:0009117 | <1e-4 | slr0263 | G0:0015291 | <1e-4 | sl11542 | G0:0044422 | <1e-4 | sl18007 | G0:0016820 | 0.0291 |
| sl10031 | G0:0052188 | <1e-4 | slr1163 | G0:0009263 | <1e-4 | sl10564 | G0:0015075 | <1e-4 | slr1611 | G0:0043226 | <1e-4 | sl11960 | G0:0016820 | 0.0291 |
| slr0907 | G0:0044260 | <1e-4 | sl10062 | G0:0019637 | <1e-4 | sl11442 | G0:0015267 | <1e-4 | slr1235 | G0:0044444 | <1e-4 | sl11606 | G0:0016820 | 0.0291 |
| slr1152 | G0:0055082 | <1e-4 | ss15113 | G0:0048878 | <1e-4 | sl11306 | G0:0022832 | <1e-4 | sl12007 | G0:0044424 | <1e-4 | slr1315 | G0:0016820 | 0.0291 |
| slr1809 | G0:0019362 | <1e-4 | ssr6002 | G0:0009124 | <1e-4 | ssr7036 | G0:0022891 | <1e-4 | sl10756 | G0:0044422 | <1e-4 | sl10266 | G0:0016820 | 0.0291 |
| sl11380 | G0:0071554 | <1e-4 | slr0692 | G0:0072524 | <1e-4 | sl11411 | G0:0015291 | <1e-4 | slr1623 | G0:0044424 | <1e-4 | sl10218 | G0:0016820 | 0.0291 |
| slr1807 | G0:0051188 | <1e-4 | sl10839 | G0:0022411 | <1e-4 | ss10461 | G0:0022857 | <1e-4 | sl10361 | G0:0044422 | <1e-4 | slr1468 | G0:0016820 | 0.0291 |
| ssr1765 | G0:0072524 | <1e-4 | slr0729 | G0:0034641 | <1e-4 | slr0601 | G0:0015405 | <1e-4 | sl10565 | G0:0044424 | <1e-4 | sl11511 | G0:0016820 | 0.0291 |
| slr2092 | G0:0008150 | <1e-4 | slr1383 | G0:0043549 | <1e-4 | sl11601 | G0:0022838 | <1e-4 | sl11651 | G0:0044464 | <1e-4 | sl11722 | G0:0016820 | 0.0291 |
| slr0919 | G0:0046128 | <1e-4 | slr0317 | G0:0051171 | <1e-4 | sl15004 | G0:0022892 | <1e-4 | slr1081 | G0:0005575 | <1e-4 | slr1753 | G0:0016820 | 0.0291 |
| ss11690 | G0:0051186 | <1e-4 | ss15129 | G0:0016054 | <1e-4 | slr0151 | G0:0043167 | <1e-4 | ssr1375 | G0:0044422 | <1e-4 | ssr2803 | G0:0005975 | 0.0285 |
| slr1880 | G0:0043933 | <1e-4 | slr6016 | G0:0019222 | <1e-4 | slr1927 | G0:0015293 | <1e-4 | slr1570 | G0:0005575 | <1e-4 | slr2018 | G0:0005975 | 0.0285 |
| slr1161 | G0:0006753 | <1e-4 | sl11509 | G0:0022607 | <1e-4 | sl10982 | G0:0008171 | <1e-4 | slr1852 | G0:0044446 | <1e-4 | slr2084 | G0:0005975 | 0.0285 |
| slr1406 | G0:0009123 | <1e-4 | slr5126 | G0:0050896 | <1e-4 | slr0250 | G0:0003674 | <1e-4 | sl17077 | G0:0043226 | <1e-4 | sl10272 | G0:0005975 | 0.0285 |
| sl10068 | G0:0034660 | <1e-4 | sl11763 | G0:0044106 | <1e-4 | ssr1768 | G0:0016818 | <1e-4 | slr6033 | G0:0043226 | <1e-4 | sl11002 | G0:0016772 | 0.0285 |
| sl11611 | G0:0044275 | <1e-4 | slr1752 | G0:0006720 | <1e-4 | slr1998 | G0:0022857 | <1e-4 | slr0812 | G0:0043226 | <1e-4 | slr0586 | G0:0016772 | 0.0285 |
| sl11873 | G0:0050896 | <1e-4 | slr1209 | G0:0048878 | <1e-4 | slr1546 | G0:0016817 | <1e-4 | sl18002 | G0:0044425 | <1e-4 | sl10381 | G0:0016772 | 0.0285 |
| sl10071 | G0:0009991 | <1e-4 | slr1464 | G0:0051186 | <1e-4 | ss12138 | G0:0042623 | <1e-4 | slr0699 | G0:0044424 | <1e-4 | sl11006 | G0:0016772 | 0.0285 |
| slr1624 | G0:0009199 | <1e-4 | slr1959 | G0:0009141 | <1e-4 | sl10925 | G0:0022892 | <1e-4 | sl16052 | G0:0043226 | <1e-4 | sl10414 | G0:0016772 | 0.0285 |
| ss13829 | G0:0009892 | <1e-4 | sl11527 | G0:0072521 | <1e-4 | sl11511 | G0:0008171 | <1e-4 | slr0711 | G0:0044425 | <1e-4 | slr1437 | G0:0016772 | 0.0285 |
| ssr7072 | G0:0044271 | <1e-4 | sl11193 | G0:0044281 | <1e-4 | sl10727 | G0:0022836 | <1e-4 | sl10685 | G0:0044425 | <1e-4 | sl10314 | G0:0016772 | 0.0285 |
| sl11340 | G0:0033013 | <1e-4 | sl10478 | G0:0044248 | <1e-4 | slr1599 | G0:0016817 | <1e-4 | sl10577 | G0:0044464 | <1e-4 | slr0921 | G0:0016772 | 0.0285 |
| slr0109 | G0:0051186 | <1e-4 | slr1721 | G0:0055086 | <1e-4 | slr1577 | G0:0016818 | <1e-4 | slr1203 | G0:0005575 | <1e-4 | sl11830 | G0:0016772 | 0.0285 |
| slr1677 | G0:0009892 | <1e-4 | slr1895 | G0:0052111 | <1e-4 | sl11505 | G0:0015405 | <1e-4 | sl11162 | G0:0005575 | <1e-4 | sl10780 | G0:0016772 | 0.0285 |
| sl11979 | G0:0006720 | <1e-4 | slr2025 | G0:0072522 | <1e-4 | slr1187 | G0:0022836 | <1e-4 | sl10177 | G0:0005575 | <1e-4 | sl10066 | G0:0016772 | 0.0285 |
| ss17038 | G0:0044271 | <1e-4 | slr1827 | G0:0043170 | <1e-4 | sl11654 | G0:0016818 | <1e-4 | slr2092 | G0:0044446 | <1e-4 | slr2144 | G0:0016772 | 0.0285 |
| slr0582 | G0:0080090 | <1e-4 | slr0199 | G0:0016052 | <1e-4 | sl10031 | G0:0016462 | <1e-4 | slr1677 | G0:0043226 | <1e-4 | sl10010 | G0:0016772 | 0.0285 |
| sl11071 | G0:0051347 | <1e-4 | slr5017 | G0:0019751 | <1e-4 | sl10499 | G0:0016817 | <1e-4 | sl10611 | G0:0044422 | <1e-4 | sl10524 | G0:0016772 | 0.0285 |
| sl10436 | G0:0006811 | <1e-4 | slr7060 | G0:0009987 | <1e-4 | sl11651 | G0:0022803 | <1e-4 | sl11995 | G0:0005575 | <1e-4 | sl10309 | G0:0016772 | 0.0285 |
| ss13451 | G0:0080090 | <1e-4 | sl17065 | G0:0001932 | <1e-4 | slr1417 | G0:0022892 | <1e-4 | slr1915 | G0:0044424 | <1e-4 | sl11656 | G0:0016772 | 0.0285 |
| slr5077 | G0:0006811 | <1e-4 | sl11528 | G0:0006732 | <1e-4 | sl11352 | G0:0016462 | <1e-4 | sl11442 | G0:0044464 | <1e-4 | slr0103 | G0:0016772 | 0.0285 |
| ssr6079 | G0:0010556 | <1e-4 | sl11510 | G0:0009991 | <1e-4 | ss12064 | G0:0015267 | <1e-4 | sl11858 | G0:0043226 | <1e-4 | slr0668 | G0:0016772 | 0.0285 |
| sl10909 | G0:0031323 | <1e-4 | sl10024 | G0:0022607 | <1e-4 | slr2111 | G0:0015267 | <1e-4 | slr0196 | G0:0043226 | <1e-4 | sl11949 | G0:0016772 | 0.0285 |
| ss18003 | G0:0009309 | <1e-4 | slr1907 | G0:0044260 | <1e-4 | sl10585 | G0:0016817 | <1e-4 | sl10815 | G0:0044422 | <1e-4 | slr2011 | G0:0016772 | 0.0285 |
| slr0151 | G0:0001932 | <1e-4 | sl10611 | G0:0009161 | <1e-4 | sl10063 | G0:0008171 | <1e-4 | sl10843 | G0:0043226 | <1e-4 | slr0192 | G0:0016772 | 0.0285 |
| sl18007 | G0:0051188 | <1e-4 | slr1513 | G0:0072522 | <1e-4 | ssr3154 | G0:0022832 | <1e-4 | slr1073 | G0:0044444 | <1e-4 | slr1572 | G0:0016772 | 0.0285 |
| sl11162 | G0:0006091 | <1e-4 | sl11979 | G0:0009893 | <1e-4 | ss16035 | G0:0016818 | <1e-4 | slr2048 | G0:0044425 | <1e-4 | slr1203 | G0:0016772 | 0.0285 |
| slr1025 | G0:0009165 | <1e-4 | ss11417 | G0:0009059 | <1e-4 | sl10982 | G0:0015075 | <1e-4 | sg10001 | G0:0044446 | <1e-4 | slr1676 | G0:0016772 | 0.0285 |
| sl11835 | G0:0050896 | <1e-4 | slr8021 | G0:0009262 | <1e-4 | slr0645 | G0:0022890 | <1e-4 | slr2011 | G0:0043226 | <1e-4 | slr1571 | G0:0016772 | 0.0285 |
| slr0976 | G0:0043170 | <1e-4 | sl11979 | G0:0042180 | <1e-4 | slr1101 | G0:0016818 | <1e-4 | sl10930 | G0:0044424 | <1e-4 | slr0845 | G0:0016772 | 0.0285 |
| slr1533 | G0:0043436 | <1e-4 | sl11766 | G0:0006066 | <1e-4 | ss10353 | G0:0015293 | <1e-4 | slr1116 | G0:0044464 | <1e-4 | sl11736 | G0:0016772 | 0.0285 |
| sl11512 | G0:0006732 | <1e-4 | slr1600 | G0:0034654 | <1e-4 | sl10608 | G0:0008171 | <1e-4 | slr1235 | G0:0005575 | <1e-4 | sl10243 | G0:0016772 | 0.0285 |
| sl10802 | G0:0044106 | <1e-4 | ss17046 | G0:0033013 | <1e-4 | sl11640 | G0:0060089 | <1e-4 | slr0654 | G0:0005575 | <1e-4 | slr2073 | G0:0016772 | 0.0285 |
| sl10985 | G0:0009893 | <1e-4 | slr0668 | G0:0009117 | <1e-4 | slr1544 | G0:0043167 | <1e-4 | slr0416 | G0:0044446 | <1e-4 | ss12065 | G0:0016772 | 0.0285 |
| sl10024 | G0:0044003 | <1e-4 | sl10268 | G0:0071842 | <1e-4 | slr1378 | G0:0003674 | <1e-4 | slr0730 | G0:0044424 | <1e-4 | slr0723 | G0:0016772 | 0.0285 |



|         |            |       |         |            |       |         |            |       |         |            |       |         |            |        |
|---------|------------|-------|---------|------------|-------|---------|------------|-------|---------|------------|-------|---------|------------|--------|
| s111934 | G0:0044282 | <1e-4 | s111378 | G0:0052111 | <1e-4 | s111853 | G0:0022832 | <1e-4 | s111770 | G0:0043226 | <1e-4 | s1r1262 | G0:0016772 | 0.0285 |
| ssr2803 | G0:0019751 | <1e-4 | s110614 | G0:0071554 | <1e-4 | s1r1854 | G0:0015075 | <1e-4 | s1r0651 | G0:0005575 | <1e-4 | s111613 | G0:0016772 | 0.0285 |
| s1r1923 | G0:0072524 | <1e-4 | s111348 | G0:0051171 | <1e-4 | s1r0907 | G0:0015291 | <1e-4 | s118001 | G0:0044425 | <1e-4 | s1r1230 | G0:0016772 | 0.0285 |
| s110181 | G0:0006066 | <1e-4 | s1r0656 | G0:0043933 | <1e-4 | s1r2073 | G0:0016817 | <1e-4 | s111906 | G0:0044444 | <1e-4 | ss10352 | G0:0016772 | 0.0285 |
| s1r1875 | G0:0009124 | <1e-4 | s116055 | G0:0042455 | <1e-4 | s111656 | G0:0016462 | <1e-4 | s1r1084 | G0:0043226 | <1e-4 | s1r2111 | G0:0016772 | 0.0285 |
| s1r0948 | G0:0051234 | <1e-4 | s1r0602 | G0:0019219 | <1e-4 | s110243 | G0:0005342 | <1e-4 | s111433 | G0:0044446 | <1e-4 | s1r0006 | G0:0016772 | 0.0285 |
| s1r2049 | G0:0044275 | <1e-4 | s111911 | G0:0042180 | <1e-4 | s110577 | G0:0022832 | <1e-4 | s110611 | G0:0005575 | <1e-4 | s1r1618 | G0:0016772 | 0.0285 |
| s1r0294 | G0:0045184 | <1e-4 | s1r1851 | G0:0044255 | <1e-4 | ss12996 | G0:0022857 | <1e-4 | s1r0184 | G0:0044422 | <1e-4 | s110532 | G0:0016772 | 0.0285 |
| s1r0519 | G0:0006753 | <1e-4 | s111570 | G0:0009059 | <1e-4 | s110156 | G0:0015405 | <1e-4 | ss11707 | G0:0044425 | <1e-4 | s111086 | G0:0016772 | 0.0285 |
| ssr3532 | G0:0009259 | <1e-4 | s1r1384 | G0:0050794 | <1e-4 | s110543 | G0:0003674 | <1e-4 | s110761 | G0:0044424 | <1e-4 | ss11255 | G0:0005515 | 0.0281 |
| s1r1056 | G0:0006163 | <1e-4 | s1r6028 | G0:0006733 | <1e-4 | s111853 | G0:0022857 | <1e-4 | s1r1918 | G0:0044444 | <1e-4 | s1r2092 | G0:0005515 | 0.0281 |
| s1r1619 | G0:0046394 | <1e-4 | s111022 | G0:0046128 | <1e-4 | s111511 | G0:0016818 | <1e-4 | s1r0967 | G0:0044422 | <1e-4 | s111737 | G0:0005515 | 0.0281 |
| s1r1068 | G0:0044271 | <1e-4 | s117067 | G0:0009057 | <1e-4 | s1r1918 | G0:0042623 | <1e-4 | s112015 | G0:0005575 | <1e-4 | s111749 | G0:0008168 | 0.0276 |
| s1r1025 | G0:0009123 | <1e-4 | s1r2117 | G0:0046164 | <1e-4 | s1r0589 | G0:0015267 | <1e-4 | s1r6088 | G0:0005575 | <1e-4 | s110647 | G0:0008168 | 0.0276 |
| s1r1601 | G0:0009059 | <1e-4 | ss11300 | G0:0009308 | <1e-4 | ss13379 | G0:0016741 | <1e-4 | ss11690 | G0:0044446 | <1e-4 | ssr2803 | G0:0008168 | 0.0276 |
| s1r0890 | G0:0090304 | <1e-4 | s1r1101 | G0:0009126 | <1e-4 | s1r0269 | G0:0043167 | <1e-4 | s110659 | G0:0044422 | <1e-4 | ssr2201 | G0:0008168 | 0.0276 |
| s110381 | G0:0048522 | <1e-4 | s110732 | G0:0009123 | <1e-4 | ssr2049 | G0:0022836 | <1e-4 | s110564 | G0:0044444 | <1e-4 | s111902 | G0:0008168 | 0.0276 |
| ssr6002 | G0:0006631 | <1e-4 | s110811 | G0:0016052 | <1e-4 | s117090 | G0:0022890 | <1e-4 | s1r1636 | G0:0044425 | <1e-4 | s1r2084 | G0:0008168 | 0.0276 |
| s110803 | G0:0001932 | <1e-4 | ss12245 | G0:0051347 | <1e-4 | s1r1275 | G0:0003674 | <1e-4 | s110984 | G0:0044464 | <1e-4 | s1r0208 | G0:0008168 | 0.0276 |
| s1r0299 | G0:0051179 | <1e-4 | s110939 | G0:0046907 | <1e-4 | s111715 | G0:0016462 | <1e-4 | s111359 | G0:0005575 | <1e-4 | s110071 | G0:0008168 | 0.0276 |
| s1r0815 | G0:0046164 | <1e-4 | s110481 | G0:0090304 | <1e-4 | s1r0348 | G0:0022838 | <1e-4 | s1r7037 | G0:0044446 | <1e-4 | s118035 | G0:0005975 | 0.0275 |
| s110981 | G0:0019637 | <1e-4 | s117064 | G0:0051347 | <1e-4 | s111532 | G0:0022838 | <1e-4 | s1r1664 | G0:0044422 | <1e-4 | s111531 | G0:0005975 | 0.0275 |
| ss11464 | G0:0055086 | <1e-4 | s110787 | G0:0034654 | <1e-4 | s116054 | G0:0016462 | <1e-4 | ssr2843 | G0:0044464 | <1e-4 | s1r2027 | G0:0005975 | 0.0275 |
| s1r1535 | G0:0051246 | <1e-4 | s110702 | G0:0046128 | <1e-4 | ss15098 | G0:0015267 | <1e-4 | s1r0064 | G0:0044422 | <1e-4 | s1r6091 | G0:0005975 | 0.0275 |
| s1r6090 | G0:0008610 | <1e-4 | ssr7084 | G0:0009150 | <1e-4 | s110436 | G0:0016746 | <1e-4 | ss15007 | G0:0005575 | <1e-4 | s1r1163 | G0:0005975 | 0.0275 |
| s111162 | G0:0006811 | <1e-4 | s110930 | G0:0034641 | <1e-4 | s110274 | G0:0022891 | <1e-4 | ssr8013 | G0:0044425 | <1e-4 | s1r8044 | G0:0005975 | 0.0275 |
| ssr1698 | G0:0043549 | <1e-4 | s1r7025 | G0:0016052 | <1e-4 | s1r0909 | G0:0060089 | <1e-4 | s110096 | G0:0044424 | <1e-4 | ssr1155 | G0:0005975 | 0.0275 |
| s110372 | G0:0065007 | <1e-4 | s112007 | G0:0071841 | <1e-4 | s1r0865 | G0:0015405 | <1e-4 | s110857 | G0:0005575 | <1e-4 | s111681 | G0:0005975 | 0.0275 |
| s1r0816 | G0:0052188 | <1e-4 | s1r0870 | G0:0031326 | <1e-4 | s1r0489 | G0:0015293 | <1e-4 | sg10001 | G0:0044424 | <1e-4 | s111882 | G0:0005975 | 0.0275 |
| s110737 | G0:0048878 | <1e-4 | s110192 | G0:0048519 | <1e-4 | s1r1591 | G0:0060089 | <1e-4 | s1r0635 | G0:0044464 | <1e-4 | s1r5087 | G0:0005975 | 0.0275 |
| s1r0337 | G0:0072527 | <1e-4 | s110691 | G0:0072521 | <1e-4 | s118002 | G0:0022832 | <1e-4 | ssr2912 | G0:0044425 | <1e-4 | ss11263 | G0:0005975 | 0.0275 |
| s1r0489 | G0:0006793 | <1e-4 | s1r1847 | G0:0046483 | <1e-4 | s110564 | G0:0022836 | <1e-4 | s1r0431 | G0:0043226 | <1e-4 | s1r0582 | G0:0005975 | 0.0275 |
| s1r1623 | G0:0045184 | <1e-4 | s1r1464 | G0:0006811 | <1e-4 | s1r7057 | G0:0022832 | <1e-4 | s111400 | G0:0005575 | <1e-4 | s1r0725 | G0:0005975 | 0.0275 |
| sm10011 | G0:0052188 | <1e-4 | s110298 | G0:0009141 | <1e-4 | s111160 | G0:0043167 | <1e-4 | s110072 | G0:0044425 | <1e-4 | ssr3129 | G0:0005975 | 0.0275 |
| s1r0337 | G0:0016054 | <1e-4 | s111866 | G0:0050896 | <1e-4 | s110553 | G0:0016746 | <1e-4 | s110096 | G0:0043226 | <1e-4 | s1r1886 | G0:0005975 | 0.0275 |
| s110412 | G0:0006811 | <1e-4 | s1r0730 | G0:0019637 | <1e-4 | s1r0144 | G0:0015075 | <1e-4 | s110910 | G0:0005575 | <1e-4 | s1r1241 | G0:0005975 | 0.0275 |
| ssr0332 | G0:0072522 | <1e-4 | s110310 | G0:0009260 | <1e-4 | s110253 | G0:0015077 | <1e-4 | s110010 | G0:0044424 | <1e-4 | s118012 | G0:0005975 | 0.0275 |
| s110751 | G0:0009260 | <1e-4 | s110241 | G0:0006091 | <1e-4 | ss12065 | G0:0043492 | <1e-4 | ss10461 | G0:0005575 | <1e-4 | s115003 | G0:0005975 | 0.0275 |
| ss12996 | G0:0051716 | <1e-4 | s1r0243 | G0:0055086 | <1e-4 | s1r5119 | G0:0022857 | <1e-4 | ss15064 | G0:0043226 | <1e-4 | ss15100 | G0:0005975 | 0.0275 |
| s1r7097 | G0:0019637 | <1e-4 | s1r1179 | G0:0019222 | <1e-4 | s1r1541 | G0:0015075 | <1e-4 | s117065 | G0:0044464 | <1e-4 | s1r5111 | G0:0005975 | 0.0275 |
| s111306 | G0:0044281 | <1e-4 | s1r1815 | G0:0009144 | <1e-4 | s1r5101 | G0:0015291 | <1e-4 | ss15068 | G0:0043226 | <1e-4 | ss17042 | G0:0005975 | 0.0275 |
| s111912 | G0:0051234 | <1e-4 | s110765 | G0:0001932 | <1e-4 | s117065 | G0:0016462 | <1e-4 | s111162 | G0:0044444 | <1e-4 | s111036 | G0:0005975 | 0.0275 |
| ss12814 | G0:0042180 | <1e-4 | ssr5092 | G0:0060255 | <1e-4 | s111060 | G0:0015267 | <1e-4 | s1r1128 | G0:0044425 | <1e-4 | s1r0590 | G0:0005975 | 0.0275 |
| ss15103 | G0:0008150 | <1e-4 | s1r1923 | G0:0051171 | <1e-4 | ssr1766 | G0:0022803 | <1e-4 | s110412 | G0:0005575 | <1e-4 | s110678 | G0:0005975 | 0.0275 |
| s110274 | G0:0009141 | <1e-4 | ss12162 | G0:0046394 | <1e-4 | s110225 | G0:0015077 | <1e-4 | s1r1493 | G0:0044444 | <1e-4 | s1r1079 | G0:0005975 | 0.0275 |
| s111380 | G0:0046394 | <1e-4 | s1r0787 | G0:0009263 | <1e-4 | s1r0142 | G0:0003674 | <1e-4 | s110024 | G0:0044446 | <1e-4 | s1r7057 | G0:0005975 | 0.0275 |
| s1r0146 | G0:0006082 | <1e-4 | ssr1155 | G0:0071840 | <1e-4 | s1r1980 | G0:0015399 | <1e-4 | s1r1196 | G0:0044464 | <1e-4 | s1r7073 | G0:0005975 | 0.0275 |
| s110101 | G0:0044281 | <1e-4 | s117069 | G0:0080090 | <1e-4 | s111783 | G0:0022890 | <1e-4 | s1r1273 | G0:0044422 | <1e-4 | s1r5037 | G0:0005975 | 0.0275 |
| s110751 | G0:0019219 | <1e-4 | s1r2119 | G0:0009144 | <1e-4 | s1r1920 | G0:0043167 | <1e-4 | s111702 | G0:0044444 | <1e-4 | s110736 | G0:0005975 | 0.0275 |
| s1r0238 | G0:0043412 | <1e-4 | s1r0845 | G0:0009892 | <1e-4 | s1r0890 | G0:0022832 | <1e-4 | s1r6004 | G0:0044444 | <1e-4 | ssr6099 | G0:0005975 | 0.0275 |
| s111911 | G0:0051179 | <1e-4 | ssr6079 | G0:0072528 | <1e-4 | s110614 | G0:0022857 | <1e-4 | s111775 | G0:0005575 | <1e-4 | s1r2000 | G0:0005975 | 0.0275 |
| ss13142 | G0:0043549 | <1e-4 | s1r7099 | G0:0009165 | <1e-4 | s1r7026 | G0:0022838 | <1e-4 | s1r0588 | G0:0044444 | <1e-4 | s117070 | G0:0005975 | 0.0275 |
| s1r0049 | G0:0046164 | <1e-4 | s110909 | G0:0048518 | <1e-4 | s1r1618 | G0:0022838 | <1e-4 | s1r0651 | G0:0044425 | <1e-4 | s1r0699 | G0:0005975 | 0.0275 |
| s1r1303 | G0:0006811 | <1e-4 | s1r1493 | G0:0046128 | <1e-4 | s1r0271 | G0:0022892 | <1e-4 | s110545 | G0:0044464 | <1e-4 | s1r6044 | G0:0005975 | 0.0275 |

|         |            |       |         |            |       |         |            |       |         |            |       |         |            |        |
|---------|------------|-------|---------|------------|-------|---------|------------|-------|---------|------------|-------|---------|------------|--------|
| sl11884 | G0:0043436 | <1e-4 | sl10372 | G0:0001932 | <1e-4 | slr1789 | G0:0022857 | <1e-4 | sl10498 | G0:0044422 | <1e-4 | slr0730 | G0:0005975 | 0.0275 |
| sl11123 | G0:0018130 | <1e-4 | sl18035 | G0:0046128 | <1e-4 | slr0250 | G0:0043492 | <1e-4 | slr1939 | G0:0044464 | <1e-4 | sl11381 | G0:0005975 | 0.0275 |
| sl10572 | G0:0010468 | <1e-4 | slr1474 | G0:0043648 | <1e-4 | slr1307 | G0:0015077 | <1e-4 | ss18039 | G0:0005575 | <1e-4 | slr1290 | G0:0005975 | 0.0275 |
| sl10867 | G0:0006811 | <1e-4 | slr0358 | G0:0065007 | <1e-4 | slr6005 | G0:0022892 | <1e-4 | slr1343 | G0:0044446 | <1e-4 | sl11340 | G0:0005975 | 0.0275 |
| slr0870 | G0:0050896 | <1e-4 | sl11151 | G0:0043933 | <1e-4 | ssr2067 | G0:0043492 | <1e-4 | sl10085 | G0:0044444 | <1e-4 | slr7071 | G0:0005975 | 0.0275 |
| slr8014 | G0:0009132 | <1e-4 | sl10263 | G0:0010468 | <1e-4 | slr1290 | G0:0043492 | <1e-4 | ssr2781 | G0:0044446 | <1e-4 | slr0588 | G0:0005975 | 0.0275 |
| slr1396 | G0:0009056 | <1e-4 | slr0270 | G0:0022411 | <1e-4 | slr2110 | G0:0022832 | <1e-4 | sl10547 | G0:0044446 | <1e-4 | slr0651 | G0:0005975 | 0.0275 |
| ss15008 | G0:0009309 | <1e-4 | ssr3572 | G0:0043648 | <1e-4 | ss11377 | G0:0015399 | <1e-4 | sl10160 | G0:0044425 | <1e-4 | sl10298 | G0:0005975 | 0.0275 |
| slr0111 | G0:0006721 | <1e-4 | sl11765 | G0:0019222 | <1e-4 | ss10483 | G0:0015075 | <1e-4 | sl17090 | G0:0005575 | <1e-4 | slr0976 | G0:0005975 | 0.0275 |
| sl10811 | G0:0051171 | <1e-4 | sl11512 | G0:0022411 | <1e-4 | slr1627 | G0:0022836 | <1e-4 | slr0211 | G0:0005575 | <1e-4 | slr0613 | G0:0005975 | 0.0275 |
| slr0729 | G0:0009260 | <1e-4 | sl11749 | G0:0055086 | <1e-4 | sl10740 | G0:0015267 | <1e-4 | sl16053 | G0:0044424 | <1e-4 | ssr2318 | G0:0005975 | 0.0275 |
| slr1896 | G0:0009165 | <1e-4 | slr6068 | G0:0031326 | <1e-4 | sl11036 | G0:0005342 | <1e-4 | sl11359 | G0:0044464 | <1e-4 | sl11095 | G0:0005975 | 0.0275 |
| ssr8047 | G0:0034641 | <1e-4 | sl18019 | G0:0044106 | <1e-4 | sl11071 | G0:0015291 | <1e-4 | sl10445 | G0:0005575 | <1e-4 | sl15004 | G0:0005975 | 0.0275 |
| sl10886 | G0:0006811 | <1e-4 | ss10410 | G0:0006066 | <1e-4 | sl10815 | G0:0016817 | <1e-4 | sl11609 | G0:0043226 | <1e-4 | slr0865 | G0:0005975 | 0.0275 |
| sl10428 | G0:0031323 | <1e-4 | slr1396 | G0:0009308 | <1e-4 | sl11240 | G0:0016746 | <1e-4 | slr2071 | G0:0005575 | <1e-4 | sl17028 | G0:0005975 | 0.0275 |
| sl11411 | G0:0019219 | <1e-4 | sl10656 | G0:0048518 | <1e-4 | slr1956 | G0:0043492 | <1e-4 | sl10608 | G0:0043226 | <1e-4 | sl10442 | G0:0005975 | 0.0275 |
| sl11552 | G0:0009263 | <1e-4 | sl15062 | G0:0050896 | <1e-4 | slr1047 | G0:0015077 | <1e-4 | slr6065 | G0:0005575 | <1e-4 | slr0816 | G0:0005975 | 0.0275 |
| sl10898 | G0:0009199 | <1e-4 | slr5073 | G0:0051716 | <1e-4 | slr1209 | G0:0016818 | <1e-4 | ss12996 | G0:0044424 | <1e-4 | slr0458 | G0:0005975 | 0.0275 |
| ssr6030 | G0:0034654 | <1e-4 | ssr5092 | G0:0031326 | <1e-4 | slr0142 | G0:0022857 | <1e-4 | sl17086 | G0:0043226 | <1e-4 | slr1142 | G0:0005975 | 0.0275 |
| slr0145 | G0:0009123 | <1e-4 | ss11417 | G0:0009161 | <1e-4 | slr6031 | G0:0015405 | <1e-4 | slr0818 | G0:0044446 | <1e-4 | sl10172 | G0:0005975 | 0.0275 |
| sl10763 | G0:0065007 | <1e-4 | ssr2554 | G0:0044260 | <1e-4 | sl10369 | G0:0022836 | <1e-4 | slr0006 | G0:0005575 | <1e-4 | slr5013 | G0:0005975 | 0.0275 |
| slr1340 | G0:0042451 | <1e-4 | ssr1528 | G0:0043170 | <1e-4 | slr7071 | G0:0022803 | <1e-4 | ss15098 | G0:0005575 | <1e-4 | sl10162 | G0:0005975 | 0.0275 |
| slr1699 | G0:0019219 | <1e-4 | sl11192 | G0:0006082 | <1e-4 | sl11340 | G0:0060089 | <1e-4 | sl10658 | G0:0044444 | <1e-4 | slr0692 | G0:0005975 | 0.0275 |
| sl10350 | G0:0010556 | <1e-4 | sl17030 | G0:0009309 | <1e-4 | ss10410 | G0:0015293 | <1e-4 | sl11956 | G0:0043226 | <1e-4 | ssr6062 | G0:0005975 | 0.0275 |
| ss17021 | G0:0005996 | <1e-4 | slr1259 | G0:0044106 | <1e-4 | sl11399 | G0:0022832 | <1e-4 | slr0976 | G0:0044425 | <1e-4 | sl11609 | G0:0005975 | 0.0275 |
| ssr7084 | G0:0055086 | <1e-4 | sl10216 | G0:0045184 | <1e-4 | slr1799 | G0:0005342 | <1e-4 | sl10595 | G0:0044424 | <1e-4 | slr1537 | G0:0005975 | 0.0275 |
| slr1306 | G0:0050801 | <1e-4 | slr0360 | G0:0043436 | <1e-4 | slr0731 | G0:0015293 | <1e-4 | slr0670 | G0:0044422 | <1e-4 | slr1174 | G0:0005975 | 0.0275 |
| sl10609 | G0:0006220 | <1e-4 | slr1681 | G0:0051818 | <1e-4 | slr1807 | G0:0016818 | <1e-4 | sl11765 | G0:0044424 | <1e-4 | ssr6019 | G0:0005975 | 0.0275 |
| ssr2317 | G0:0055114 | <1e-4 | slr2117 | G0:0045184 | <1e-4 | sl11002 | G0:0043492 | <1e-4 | sl10584 | G0:0044446 | <1e-4 | slr1450 | G0:0005975 | 0.0275 |
| sl10361 | G0:0048518 | <1e-4 | ss12384 | G0:0006720 | <1e-4 | sl10044 | G0:0015293 | <1e-4 | slr1616 | G0:0044422 | <1e-4 | sl10372 | G0:0005975 | 0.0275 |
| slr0317 | G0:0046394 | <1e-4 | slr0142 | G0:0072521 | <1e-4 | sl10980 | G0:0016462 | <1e-4 | slr1025 | G0:0044424 | <1e-4 | slr6029 | G0:0005975 | 0.0275 |
| sl10564 | G0:0033013 | <1e-4 | sl10282 | G0:0006721 | <1e-4 | sl10424 | G0:0015267 | <1e-4 | ss12162 | G0:0044422 | <1e-4 | slr2117 | G0:0005975 | 0.0275 |
| sl10298 | G0:0019362 | <1e-4 | sl10268 | G0:0072528 | <1e-4 | ss10461 | G0:0060089 | <1e-4 | sl11995 | G0:0044464 | <1e-4 | slr0509 | G0:0005975 | 0.0275 |
| sl10031 | G0:0042455 | <1e-4 | slr1940 | G0:0051347 | <1e-4 | ssr5117 | G0:0016741 | <1e-4 | sl11173 | G0:0044446 | <1e-4 | slr5012 | G0:0005975 | 0.0275 |
| sl11797 | G0:0060255 | <1e-4 | slr0948 | G0:0008150 | <1e-4 | slr1753 | G0:0016818 | <1e-4 | slr0459 | G0:0044446 | <1e-4 | slr6071 | G0:0005975 | 0.0275 |
| sl10810 | G0:0006766 | <1e-4 | sl11106 | G0:0072524 | <1e-4 | slr2071 | G0:0043492 | <1e-4 | slr1999 | G0:0044464 | <1e-4 | slr2004 | G0:0005975 | 0.0275 |
| slr2012 | G0:0010556 | <1e-4 | sl11726 | G0:0072522 | <1e-4 | slr0801 | G0:0022836 | <1e-4 | slr5111 | G0:0043226 | <1e-4 | sl11911 | G0:0005975 | 0.0275 |
| sl10443 | G0:0060255 | <1e-4 | sl10863 | G0:0051818 | <1e-4 | sl11318 | G0:0005342 | <1e-4 | sl10191 | G0:0044425 | <1e-4 | slr0587 | G0:0005975 | 0.0275 |
| sl10670 | G0:0009126 | <1e-4 | sl11414 | G0:0006721 | <1e-4 | sl11380 | G0:0016817 | <1e-4 | slr0496 | G0:0005575 | <1e-4 | ssr6078 | G0:0005975 | 0.0275 |
| slr1053 | G0:0034660 | <1e-4 | sl11352 | G0:0044003 | <1e-4 | sl11464 | G0:0022832 | <1e-4 | slr1679 | G0:0044464 | <1e-4 | sl17067 | G0:0005975 | 0.0275 |
| sl16053 | G0:0046164 | <1e-4 | slr2080 | G0:0065007 | <1e-4 | slr1767 | G0:0015293 | <1e-4 | sl10487 | G0:0044424 | <1e-4 | ssr2553 | G0:0005975 | 0.0275 |
| sl10172 | G0:0009892 | <1e-4 | slr1071 | G0:0048522 | <1e-4 | slr1342 | G0:0008171 | <1e-4 | slr0407 | G0:0044444 | <1e-4 | ssr8047 | G0:0005975 | 0.0275 |
| slr2052 | G0:0009987 | <1e-4 | sl11735 | G0:0051188 | <1e-4 | sl10939 | G0:0015399 | <1e-4 | slr1970 | G0:0043226 | <1e-4 | slr0326 | G0:0005975 | 0.0275 |
| slr1195 | G0:0065007 | <1e-4 | slr1648 | G0:0009117 | <1e-4 | slr0272 | G0:0022891 | <1e-4 | slr1978 | G0:0044425 | <1e-4 | sl11717 | G0:0005975 | 0.0275 |
| sl11659 | G0:0046164 | <1e-4 | sl11696 | G0:0009892 | <1e-4 | slr1674 | G0:0003674 | <1e-4 | slr2000 | G0:0044422 | <1e-4 | ssr3570 | G0:0005975 | 0.0275 |
| sl11906 | G0:0042282 | <1e-4 | slr1847 | G0:0016053 | <1e-4 | slr1270 | G0:0022891 | <1e-4 | ssr5074 | G0:0043226 | <1e-4 | ss11046 | G0:0005975 | 0.0275 |
| slr0317 | G0:0042455 | <1e-4 | ss13379 | G0:0019752 | <1e-4 | sl15089 | G0:0022890 | <1e-4 | sl10944 | G0:0044446 | <1e-4 | slr1474 | G0:0005975 | 0.0275 |
| sl10863 | G0:0071840 | <1e-4 | slr5102 | G0:0009987 | <1e-4 | sl11511 | G0:0015075 | <1e-4 | slr0579 | G0:0005575 | <1e-4 | slr1327 | G0:0005975 | 0.0275 |
| sl11630 | G0:0009259 | <1e-4 | slr1081 | G0:0009123 | <1e-4 | slr6087 | G0:0042623 | <1e-4 | ss18028 | G0:0044446 | <1e-4 | slr0269 | G0:0005975 | 0.0275 |
| sl10424 | G0:0031323 | <1e-4 | slr1667 | G0:0019752 | <1e-4 | slr1436 | G0:0008171 | <1e-4 | ssr3410 | G0:0044446 | <1e-4 | slr1438 | G0:0005975 | 0.0275 |
| slr0978 | G0:0016054 | <1e-4 | ssr2318 | G0:0009262 | <1e-4 | slr0294 | G0:0022857 | <1e-4 | sl10481 | G0:0044424 | <1e-4 | slr1577 | G0:0005975 | 0.0275 |
| sl10756 | G0:0019362 | <1e-4 | slr2005 | G0:0031326 | <1e-4 | slr6063 | G0:0015399 | <1e-4 | ss13615 | G0:0044464 | <1e-4 | slr1170 | G0:0005975 | 0.0275 |
| slr0503 | G0:0051188 | <1e-4 | slr1083 | G0:0051716 | <1e-4 | slr0483 | G0:0008171 | <1e-4 | slr1407 | G0:0043226 | <1e-4 | sl11319 | G0:0005975 | 0.0275 |
| sl10762 | G0:0009991 | <1e-4 | slr1753 | G0:0044248 | <1e-4 | slr6067 | G0:0015267 | <1e-4 | slr1618 | G0:0044422 | <1e-4 | ssr1558 | G0:0005975 | 0.0275 |

slr0975 G0:0019751 <1e-4 sll0545 G0:0006811 <1e-4 sssr2787 G0:0015291 <1e-4 slr1384 G0:0043226 <1e-4 sssr0336 G0:0005975 0.0275  
sll10596 G0:0051347 <1e-4 slr0981 G0:0043170 <1e-4 slr1084 G0:0022892 <1e-4 slr1174 G0:0044422 <1e-4 sssr1425 G0:0005975 0.0275  
sll10280 G0:0043648 <1e-4 slr0397 G0:0009117 <1e-4 sll10783 G0:0015077 <1e-4 slr1047 G0:0044464 <1e-4 slr5112 G0:0005975 0.0275  
slr0885 G0:0050896 <1e-4 sll11464 G0:0034660 <1e-4 sll10911 G0:0022832 <1e-4 sll11166 G0:0044444 <1e-4 slr0271 G0:0005975 0.0275  
sll11472 G0:0044106 <1e-4 sssr1041 G0:0009987 <1e-4 slr5024 G0:0003674 <1e-4 slr5053 G0:0044444 <1e-4 sss12971 G0:0005975 0.0275  
slr0869 G0:0009142 <1e-4 sll10994 G0:0044282 <1e-4 sll11586 G0:0022803 <1e-4 sll15067 G0:0044424 <1e-4 sll11926 G0:0005975 0.0275  
ss11464 G0:0009987 <1e-4 slr6029 G0:0016053 <1e-4 sssr1765 G0:0043167 <1e-4 slr0039 G0:0043226 <1e-4 sll10101 G0:0005975 0.0275  
sll10355 G0:0006753 <1e-4 slr1260 G0:0034641 <1e-4 slr1425 G0:0022803 <1e-4 sll11132 G0:0044422 <1e-4 slr1052 G0:0004871 0.0271  
slr0300 G0:0046483 <1e-4 sll11109 G0:0072522 <1e-4 sll10858 G0:0003674 <1e-4 sss17021 G0:0044444 <1e-4 sll11061 G0:0016820 0.0269  
slr1437 G0:0006066 <1e-4 slr1690 G0:0055114 <1e-4 slr1493 G0:0042623 <1e-4 slr1033 G0:0043226 <1e-4 sll11262 G0:0016820 0.0269  
slr1914 G0:0019222 <1e-4 sll17090 G0:0055086 <1e-4 sssr3570 G0:0060089 <1e-4 sll10923 G0:0044444 <1e-4 sll10243 G0:0016820 0.0269  
sll11526 G0:0051171 <1e-4 slr0483 G0:0009161 <1e-4 slr0209 G0:0016818 <1e-4 sll15132 G0:0005575 <1e-4 slr1667 G0:0016820 0.0269  
slr1116 G0:0009308 <1e-4 slr0967 G0:0072521 <1e-4 sll11832 G0:0015077 <1e-4 slr2080 G0:0044424 <1e-4 sll11736 G0:0016820 0.0269  
slr0586 G0:0080090 <1e-4 sll10691 G0:0031640 <1e-4 slr1573 G0:0015267 <1e-4 sll10871 G0:0044464 <1e-4 slr0668 G0:0016820 0.0269  
slr1789 G0:0072524 <1e-4 sssr3467 G0:0009057 <1e-4 sll12011 G0:0015293 <1e-4 slr1032 G0:0005575 <1e-4 slr0204 G0:0016820 0.0269  
ssr1258 G0:0009308 <1e-4 sssr5121 G0:0022607 <1e-4 slr1223 G0:0043167 <1e-4 slr6028 G0:0044424 <1e-4 sll11530 G0:0016820 0.0269  
slr5101 G0:0009394 <1e-4 slr0217 G0:0065007 <1e-4 slr1565 G0:0015077 <1e-4 sssr6030 G0:0043226 <1e-4 sssr3122 G0:0016820 0.0269  
ssr7017 G0:0072521 <1e-4 slr0053 G0:0006732 <1e-4 slr1338 G0:0008171 <1e-4 sssr6030 G0:0044424 <1e-4 slr1073 G0:0016820 0.0269  
slr5112 G0:0090304 <1e-4 sssr2422 G0:0043549 <1e-4 sll11319 G0:0005342 <1e-4 slr0964 G0:0044424 <1e-4 slr0294 G0:0016820 0.0269  
sll11915 G0:0010468 <1e-4 slr1070 G0:0050794 <1e-4 sll10282 G0:0016817 <1e-4 sll11773 G0:0044424 <1e-4 slr2111 G0:0016820 0.0269  
sll17087 G0:0050794 <1e-4 slr1034 G0:0006811 <1e-4 slr1863 G0:0015267 <1e-4 sll10497 G0:0044464 <1e-4 slr1081 G0:0016820 0.0269  
slr1819 G0:0055082 <1e-4 sll15067 G0:0009124 <1e-4 slr0642 G0:0022892 <1e-4 sll11321 G0:0005575 <1e-4 slr1648 G0:0016820 0.0269  
sll10335 G0:0048522 <1e-4 sll10381 G0:0046164 <1e-4 slr5118 G0:0016817 <1e-4 sll12006 G0:0044424 <1e-4 sll10355 G0:0016820 0.0269  
slr0243 G0:0010556 <1e-4 sll10508 G0:0006721 <1e-4 sll10242 G0:0022832 <1e-4 sll17062 G0:0005575 <1e-4 slr0913 G0:0016820 0.0269  
ss13383 G0:0034654 <1e-4 sll10524 G0:0051234 <1e-4 sll10981 G0:0022832 <1e-4 sll10911 G0:0044425 <1e-4 slr2122 G0:0016820 0.0269  
sll11319 G0:0006066 <1e-4 slr0103 G0:0019637 <1e-4 sll11785 G0:0015293 <1e-4 sll10909 G0:0044446 <1e-4 sll10010 G0:0016820 0.0269  
slr0149 G0:0050794 <1e-4 slr1438 G0:0009262 <1e-4 slr6015 G0:0015291 <1e-4 slr0702 G0:0044424 <1e-4 sss12807 G0:0016820 0.0269  
slr2052 G0:0043170 <1e-4 sll11022 G0:0072524 <1e-4 slr1907 G0:0022832 <1e-4 sssr5092 G0:0044446 <1e-4 slr1880 G0:0016820 0.0269  
ss11417 G0:0042180 <1e-4 sll11218 G0:0051716 <1e-4 sssr0332 G0:0016818 <1e-4 slr1472 G0:0044422 <1e-4 sssr2439 G0:0016820 0.0269  
sll10369 G0:0009117 <1e-4 slr1590 G0:0043549 <1e-4 sll10456 G0:0043492 <1e-4 sssr2711 G0:0044425 <1e-4 slr1913 G0:0016820 0.0269  
sll10645 G0:0065007 <1e-4 sll11025 G0:0034641 <1e-4 slr1287 G0:0016746 <1e-4 sll18040 G0:0044422 <1e-4 slr1230 G0:0016820 0.0269  
sll10732 G0:0043549 <1e-4 sssr1951 G0:0071841 <1e-4 sll10149 G0:0016874 <1e-4 sll10678 G0:0043226 <1e-4 slr0023 G0:0016820 0.0269  
sll10843 G0:0051171 <1e-4 slr2011 G0:0006793 <1e-4 slr0038 G0:0015077 <1e-4 slr0967 G0:0044464 <1e-4 sssr2615 G0:0016820 0.0269  
slr1944 G0:0051179 <1e-4 sll18027 G0:0006082 <1e-4 sll10564 G0:0015267 <1e-4 slr1391 G0:0044425 <1e-4 slr1999 G0:0016820 0.0269  
slr1914 G0:0009889 <1e-4 sll10149 G0:0006091 <1e-4 sll10737 G0:0022890 <1e-4 sss15129 G0:0044422 <1e-4 slr0364 G0:0016820 0.0269  
ssr3402 G0:0042455 <1e-4 slr0780 G0:0009142 <1e-4 sll11054 G0:0060089 <1e-4 sll10995 G0:0044422 <1e-4 sll10325 G0:0016820 0.0269  
slr6066 G0:0060255 <1e-4 slr7014 G0:0031326 <1e-4 sll11239 G0:0003674 <1e-4 sll11632 G0:0044464 <1e-4 sll10944 G0:0016820 0.0269  
ss12069 G0:0001932 <1e-4 sssr1552 G0:0019752 <1e-4 slr1900 G0:0022836 <1e-4 sll10847 G0:0005575 <1e-4 sll11942 G0:0016772 0.0268  
sll11726 G0:0055082 <1e-4 slr0241 G0:0055114 <1e-4 slr0590 G0:0016817 <1e-4 sssr3409 G0:0044422 <1e-4 slr1023 G0:0016772 0.0268  
ss12733 G0:0048518 <1e-4 slr0038 G0:0006576 <1e-4 sss10739 G0:0015075 <1e-4 slr1919 G0:0044422 <1e-4 slr1045 G0:0016772 0.0268  
slr6074 G0:0009141 <1e-4 sll10269 G0:0006733 <1e-4 slr0742 G0:0022857 <1e-4 slr1789 G0:0044425 <1e-4 slr1391 G0:0016772 0.0268  
sll11250 G0:0005996 <1e-4 slr1186 G0:0046907 <1e-4 slr6067 G0:0042623 <1e-4 slr0111 G0:0044446 <1e-4 slr1441 G0:0016772 0.0268  
sll10584 G0:0010556 <1e-4 sll10096 G0:0008150 <1e-4 slr0609 G0:0008171 <1e-4 sss18039 G0:0043226 <1e-4 sll10096 G0:0016772 0.0268  
ss11923 G0:0009394 <1e-4 sll11164 G0:0005996 <1e-4 slr6067 G0:0043167 <1e-4 slr1863 G0:0044444 <1e-4 slr0211 G0:0016772 0.0268  
ssr0759 G0:0048522 <1e-4 sll10602 G0:0006811 <1e-4 sss10242 G0:0022803 <1e-4 slr0407 G0:0043226 <1e-4 slr1398 G0:0016772 0.0268  
slr0058 G0:0045184 <1e-4 sll10735 G0:0009144 <1e-4 sll10266 G0:0042623 <1e-4 slr1939 G0:0044422 <1e-4 slr0937 G0:0016772 0.0268  
slr1702 G0:0009126 <1e-4 sll15128 G0:0046128 <1e-4 slr1391 G0:0022838 <1e-4 slr0333 G0:0044446 <1e-4 slr0871 G0:0016772 0.0268  
slr0587 G0:0046128 <1e-4 sll15090 G0:0006766 <1e-4 sll11401 G0:0043492 <1e-4 sll10361 G0:0005575 <1e-4 sll11433 G0:0016772 0.0268  
slr0516 G0:0019219 <1e-4 sll11526 G0:0009141 <1e-4 sll18040 G0:0043167 <1e-4 sss11690 G0:0005575 <1e-4 sll11218 G0:0016772 0.0268  
slr0263 G0:0090304 <1e-4 slr0013 G0:0046164 <1e-4 sll10381 G0:0016817 <1e-4 sll10815 G0:0044464 <1e-4 sll10513 G0:0016772 0.0268  
sll10101 G0:0051246 <1e-4 slr7026 G0:0051234 <1e-4 slr0645 G0:0016741 <1e-4 sss15095 G0:0044424 <1e-4 sll11472 G0:0016772 0.0268  
sll11638 G0:0055114 <1e-4 slr1847 G0:0006576 <1e-4 sll11609 G0:0005342 <1e-4 sss15025 G0:0044424 <1e-4 sssr1698 G0:0016772 0.0268  
ssr1552 G0:0055086 <1e-4 slr7082 G0:0006811 <1e-4 sll11766 G0:0015267 <1e-4 sll17029 G0:0044444 <1e-4 slr1900 G0:0016772 0.0268  
ssr5019 G0:0034660 <1e-4 sll10911 G0:0071554 <1e-4 sll10298 G0:0016462 <1e-4 slr0708 G0:0005575 <1e-4 sll11135 G0:0016772 0.0268

|         |            |       |         |            |       |         |            |       |         |            |       |         |            |        |
|---------|------------|-------|---------|------------|-------|---------|------------|-------|---------|------------|-------|---------|------------|--------|
| s111192 | G0:0009142 | <1e-4 | s110843 | G0:0008150 | <1e-4 | s111040 | G0:0016818 | <1e-4 | s111906 | G0:0044446 | <1e-4 | s110854 | G0:0016772 | 0.0268 |
| s1r2101 | G0:0019637 | <1e-4 | s1r2121 | G0:0046128 | <1e-4 | s1r1807 | G0:0015291 | <1e-4 | ss18005 | G0:0044424 | <1e-4 | s1r1505 | G0:0016772 | 0.0268 |
| s111201 | G0:0042455 | <1e-4 | s110910 | G0:0009893 | <1e-4 | s1r7012 | G0:0060089 | <1e-4 | ss13451 | G0:0044425 | <1e-4 | s1r0852 | G0:0016772 | 0.0268 |
| s111390 | G0:0090304 | <1e-4 | s111321 | G0:0006576 | <1e-4 | s111940 | G0:0022890 | <1e-4 | s111921 | G0:0044425 | <1e-4 | s111715 | G0:0016772 | 0.0268 |
| s1r1660 | G0:0072522 | <1e-4 | s1r0845 | G0:0006733 | <1e-4 | ss11046 | G0:0015291 | <1e-4 | ss16035 | G0:0044446 | <1e-4 | s1r0545 | G0:0016772 | 0.0268 |
| s111024 | G0:0001932 | <1e-4 | s1r1875 | G0:0005996 | <1e-4 | s111344 | G0:0022857 | <1e-4 | s1r0147 | G0:0043226 | <1e-4 | ss13692 | G0:0016772 | 0.0268 |
| s1r2080 | G0:0046394 | <1e-4 | s1r0208 | G0:0071496 | <1e-4 | s1r0076 | G0:0015399 | <1e-4 | s110382 | G0:0044424 | <1e-4 | s1r0209 | G0:0016772 | 0.0268 |
| ss10738 | G0:0008610 | <1e-4 | s1r0250 | G0:0019219 | <1e-4 | s110602 | G0:0043167 | <1e-4 | s1r0263 | G0:0044446 | <1e-4 | s1r1083 | G0:0016772 | 0.0268 |
| s1r6103 | G0:0009126 | <1e-4 | s1r0400 | G0:0046128 | <1e-4 | s112011 | G0:0022892 | <1e-4 | s1r7058 | G0:0044425 | <1e-4 | ss11255 | G0:0005975 | 0.0267 |
| s1r0606 | G0:0018130 | <1e-4 | s110614 | G0:0051188 | <1e-4 | ssr1698 | G0:0015077 | <1e-4 | s110761 | G0:0044425 | <1e-4 | s1r0810 | G0:0005975 | 0.0267 |
| s111025 | G0:0050794 | <1e-4 | s111217 | G0:0019222 | <1e-4 | ssr1558 | G0:0016462 | <1e-4 | s110787 | G0:0044464 | <1e-4 | ssr2843 | G0:0005975 | 0.0267 |
| s1r0060 | G0:0044003 | <1e-4 | s110449 | G0:0046907 | <1e-4 | ssr2848 | G0:0043167 | <1e-4 | s110910 | G0:0044424 | <1e-4 | s111609 | G0:0008168 | 0.0261 |
| s1r1116 | G0:0055114 | <1e-4 | s110735 | G0:0051171 | <1e-4 | s110376 | G0:0003674 | <1e-4 | s1r0058 | G0:0044446 | <1e-4 | s111188 | G0:0008168 | 0.0261 |
| s1r0815 | G0:0044255 | <1e-4 | s1r0813 | G0:0051179 | <1e-4 | ssr2972 | G0:0022892 | <1e-4 | s111913 | G0:0005575 | <1e-4 | s111532 | G0:0008168 | 0.0261 |
| s111442 | G0:0051246 | <1e-4 | s111775 | G0:0009056 | <1e-4 | s1r2010 | G0:0022803 | <1e-4 | s1r1819 | G0:0044444 | <1e-4 | s1r0976 | G0:0008168 | 0.0261 |
| ssr2009 | G0:0046394 | <1e-4 | ss17046 | G0:0009056 | <1e-4 | s115034 | G0:0015291 | <1e-4 | s1r7013 | G0:0044446 | <1e-4 | ssr6086 | G0:0008168 | 0.0261 |
| s110047 | G0:0006220 | <1e-4 | s1r6104 | G0:0009394 | <1e-4 | ssr5092 | G0:0015267 | <1e-4 | s1r1161 | G0:0044422 | <1e-4 | ss17051 | G0:0008168 | 0.0261 |
| s1r6005 | G0:0042451 | <1e-4 | s111252 | G0:0008150 | <1e-4 | ss17074 | G0:0015075 | <1e-4 | s1r0317 | G0:0044425 | <1e-4 | s1r0271 | G0:0008168 | 0.0261 |
| s1r1474 | G0:0006733 | <1e-4 | s1r0642 | G0:0009056 | <1e-4 | s110843 | G0:0022892 | <1e-4 | s1r1814 | G0:0043226 | <1e-4 | s118001 | G0:0008168 | 0.0261 |
| s111906 | G0:0044106 | <1e-4 | ss12733 | G0:0043436 | <1e-4 | s110350 | G0:0043492 | <1e-4 | s111174 | G0:0005575 | <1e-4 | s1r0039 | G0:0008168 | 0.0261 |
| s1r1045 | G0:0006793 | <1e-4 | s1r1674 | G0:0055086 | <1e-4 | s111265 | G0:0016746 | <1e-4 | s1r1940 | G0:0044464 | <1e-4 | s110335 | G0:0008168 | 0.0261 |
| ss11300 | G0:0048878 | <1e-4 | s115089 | G0:0016054 | <1e-4 | s1r0551 | G0:0015405 | <1e-4 | s1r1187 | G0:0005575 | <1e-4 | s1r0397 | G0:0008168 | 0.0261 |
| s111954 | G0:0055082 | <1e-4 | s115003 | G0:0006811 | <1e-4 | s1r1170 | G0:0016818 | <1e-4 | s1r0852 | G0:0044446 | <1e-4 | s117069 | G0:0008168 | 0.0261 |
| s1r1203 | G0:0006576 | <1e-4 | ss12733 | G0:0006631 | <1e-4 | s111319 | G0:0022803 | <1e-4 | s1r1062 | G0:0005575 | <1e-4 | s111979 | G0:0008168 | 0.0261 |
| s1r1819 | G0:0071841 | <1e-4 | s1r0586 | G0:0009199 | <1e-4 | s111950 | G0:0015293 | <1e-4 | ss11045 | G0:0044424 | <1e-4 | s1r6106 | G0:0008168 | 0.0261 |
| s1r7100 | G0:0043549 | <1e-4 | s1r1647 | G0:0051186 | <1e-4 | s111717 | G0:0043167 | <1e-4 | s1r1544 | G0:0044424 | <1e-4 | ss17038 | G0:0008168 | 0.0261 |
| s110810 | G0:0080090 | <1e-4 | s1r1303 | G0:0031640 | <1e-4 | ss17007 | G0:0016817 | <1e-4 | s1r0598 | G0:0044444 | <1e-4 | s1r0285 | G0:0008168 | 0.0261 |
| s110216 | G0:0071496 | <1e-4 | s110327 | G0:0006091 | <1e-4 | ss11690 | G0:0016462 | <1e-4 | ss15103 | G0:0005575 | <1e-4 | ss17007 | G0:0008168 | 0.0261 |
| s1r1230 | G0:0009889 | <1e-4 | s111608 | G0:0072527 | <1e-4 | s1r5018 | G0:0022857 | <1e-4 | s1r1788 | G0:0044446 | <1e-4 | s1r6009 | G0:0008168 | 0.0261 |
| s110732 | G0:0009124 | <1e-4 | s1r1116 | G0:0016054 | <1e-4 | s1r0871 | G0:0005342 | <1e-4 | s1r1807 | G0:0043226 | <1e-4 | ssr2711 | G0:0008168 | 0.0261 |
| s1r0013 | G0:0090304 | <1e-4 | s111715 | G0:0006732 | <1e-4 | s1r0871 | G0:0022836 | <1e-4 | s117077 | G0:0044464 | <1e-4 | s1r0270 | G0:0008168 | 0.0261 |
| s111340 | G0:0009141 | <1e-4 | s1r2070 | G0:0006091 | <1e-4 | s1r6033 | G0:0015075 | <1e-4 | s1r1184 | G0:0044424 | <1e-4 | s117050 | G0:0008168 | 0.0261 |
| s1r0650 | G0:0006721 | <1e-4 | s1r1033 | G0:0031323 | <1e-4 | s1r7060 | G0:0015291 | <1e-4 | s1r1679 | G0:0005575 | <1e-4 | ss12064 | G0:0008168 | 0.0261 |
| s110101 | G0:0006220 | <1e-4 | ssr0336 | G0:0009889 | <1e-4 | s1r7059 | G0:0015399 | <1e-4 | ssr2333 | G0:0044464 | <1e-4 | ssr5106 | G0:0008168 | 0.0261 |
| s111785 | G0:0042451 | <1e-4 | s1r2018 | G0:0031640 | <1e-4 | s1r5013 | G0:0015291 | <1e-4 | s1r6007 | G0:0044464 | <1e-4 | s111381 | G0:0008168 | 0.0261 |
| s1r1789 | G0:0031323 | <1e-4 | ss18003 | G0:0006220 | <1e-4 | s1r0318 | G0:0015077 | <1e-4 | s1r2003 | G0:0044422 | <1e-4 | s110101 | G0:0008168 | 0.0261 |
| s1r0516 | G0:0051246 | <1e-4 | s1r0476 | G0:0080090 | <1e-4 | s110886 | G0:0022891 | <1e-4 | s1r0712 | G0:0005575 | <1e-4 | s1r6029 | G0:0008168 | 0.0261 |
| s110024 | G0:0009057 | <1e-4 | s112015 | G0:0009199 | <1e-4 | s111061 | G0:0015399 | <1e-4 | s110647 | G0:0043226 | <1e-4 | ssr6002 | G0:0008168 | 0.0261 |
| s1r1990 | G0:0009059 | <1e-4 | s1r0496 | G0:0006793 | <1e-4 | ssr7017 | G0:0003674 | <1e-4 | s110563 | G0:0044425 | <1e-4 | s115067 | G0:0008168 | 0.0261 |
| s110372 | G0:0009262 | <1e-4 | s110543 | G0:0046483 | <1e-4 | s110443 | G0:0005342 | <1e-4 | s110237 | G0:0044446 | <1e-4 | s1r1627 | G0:0008168 | 0.0261 |
| s1r0517 | G0:0009394 | <1e-4 | ss17048 | G0:0034641 | <1e-4 | s111911 | G0:0022891 | <1e-4 | s1r0393 | G0:0043226 | <1e-4 | s111024 | G0:0008168 | 0.0261 |
| s111773 | G0:0006721 | <1e-4 | s111188 | G0:0072521 | <1e-4 | s1r1441 | G0:0015075 | <1e-4 | s1r1854 | G0:0044422 | <1e-4 | s1r0416 | G0:0008168 | 0.0261 |
| s111542 | G0:0006576 | <1e-4 | s111586 | G0:0031326 | <1e-4 | s110010 | G0:0022832 | <1e-4 | s118035 | G0:0044424 | <1e-4 | s115132 | G0:0008168 | 0.0261 |
| s110487 | G0:0043412 | <1e-4 | ssr2009 | G0:0048519 | <1e-4 | s110410 | G0:0003674 | <1e-4 | s117043 | G0:0044424 | <1e-4 | ss15100 | G0:0008168 | 0.0261 |
| ss10242 | G0:0072521 | <1e-4 | s1r0059 | G0:0019219 | <1e-4 | s1r6022 | G0:0016818 | <1e-4 | s110265 | G0:0044424 | <1e-4 | s1r5053 | G0:0008168 | 0.0261 |
| s1r1577 | G0:0072522 | <1e-4 | s1r1702 | G0:0019637 | <1e-4 | s1r0104 | G0:0015077 | <1e-4 | ss15129 | G0:0005575 | <1e-4 | s111714 | G0:0008168 | 0.0261 |
| ssr1499 | G0:0009394 | <1e-4 | s111906 | G0:0009260 | <1e-4 | s1r1484 | G0:0015293 | <1e-4 | s111372 | G0:0044422 | <1e-4 | ss12162 | G0:0008168 | 0.0261 |
| s1r1450 | G0:0051818 | <1e-4 | s1r1079 | G0:0044282 | <1e-4 | s111132 | G0:0022836 | <1e-4 | s1r0545 | G0:0044425 | <1e-4 | s1r1079 | G0:0008168 | 0.0261 |
| s110552 | G0:0001932 | <1e-4 | s1r1189 | G0:0008150 | <1e-4 | s1r1186 | G0:0008171 | <1e-4 | s111858 | G0:0044422 | <1e-4 | s111321 | G0:0008168 | 0.0261 |
| s110513 | G0:0055114 | <1e-4 | s111024 | G0:0034654 | <1e-4 | s110588 | G0:0043167 | <1e-4 | s1r1648 | G0:0044424 | <1e-4 | s118019 | G0:0008168 | 0.0261 |
| s1r1276 | G0:0006766 | <1e-4 | s1r7026 | G0:0046394 | <1e-4 | s1r0270 | G0:0015399 | <1e-4 | s1r0172 | G0:0044446 | <1e-4 | s1r1670 | G0:0008168 | 0.0261 |
| s1r1215 | G0:0034654 | <1e-4 | s1r0730 | G0:0051716 | <1e-4 | s1r1624 | G0:0016817 | <1e-4 | s1r6013 | G0:0044464 | <1e-4 | ss15015 | G0:0008168 | 0.0261 |
| s111730 | G0:0034654 | <1e-4 | s1r0479 | G0:0009059 | <1e-4 | s1r0476 | G0:0016741 | <1e-4 | s1r0468 | G0:0044422 | <1e-4 | ss18039 | G0:0008168 | 0.0261 |
| sg10001 | G0:0009165 | <1e-4 | s1r1999 | G0:0043436 | <1e-4 | s1r1799 | G0:0015075 | <1e-4 | s110456 | G0:0043226 | <1e-4 | s110984 | G0:0008168 | 0.0261 |

slr0408 G0:0009165 <1e-4 slr6088 G0:0018130 <1e-4 slr1079 G0:0022803 <1e-4 slr0935 G0:0005575 <1e-4 slr6022 G0:0008168 0.0261  
slr0104 G0:0055086 <1e-4 sl17033 G0:0009259 <1e-4 sl10048 G0:0005342 <1e-4 sl11542 G0:0044425 <1e-4 sl10736 G0:0008168 0.0261  
sl11680 G0:0043170 <1e-4 sss3189 G0:0006811 <1e-4 sl11562 G0:0016741 <1e-4 slr1074 G0:0044444 <1e-4 sl10563 G0:0008168 0.0261  
slr1083 G0:0071496 <1e-4 slr1056 G0:0031640 <1e-4 sl10350 G0:0016817 <1e-4 slr2049 G0:0044446 <1e-4 slr1704 G0:0008168 0.0261  
slr1658 G0:0048522 <1e-4 sl10101 G0:0043412 <1e-4 slr1203 G0:0015291 <1e-4 sl11638 G0:0044444 <1e-4 sss2975 G0:0008168 0.0261  
slr5087 G0:0072522 <1e-4 slr1053 G0:0009892 <1e-4 sl10780 G0:0015293 <1e-4 slr0692 G0:0044444 <1e-4 slr0498 G0:0008168 0.0261  
sl10497 G0:0046164 <1e-4 slr1415 G0:0009199 <1e-4 slr1258 G0:0016741 <1e-4 slr0407 G0:0005575 <1e-4 slr7071 G0:0008168 0.0261  
sl10263 G0:0048878 <1e-4 sl10595 G0:0019219 <1e-4 sl15097 G0:0042623 <1e-4 sl11751 G0:0044422 <1e-4 sl11191 G0:0008168 0.0261  
slr1778 G0:0044003 <1e-4 slr0111 G0:0006091 <1e-4 sl11570 G0:0015291 <1e-4 slr1854 G0:0044444 <1e-4 sl11495 G0:0008168 0.0261  
sl11797 G0:0031323 <1e-4 sl17070 G0:0001932 <1e-4 slr0491 G0:0022832 <1e-4 sl10406 G0:0005575 <1e-4 sl17086 G0:0008168 0.0261  
ssl2138 G0:0009057 <1e-4 slr2110 G0:0006811 <1e-4 ss15129 G0:0022892 <1e-4 slr0169 G0:0005575 <1e-4 sss6099 G0:0008168 0.0261  
sl10780 G0:0044248 <1e-4 slr5053 G0:0006753 <1e-4 sss3122 G0:0016818 <1e-4 slr1800 G0:0044464 <1e-4 slr5087 G0:0008168 0.0261  
sl10060 G0:0050789 <1e-4 slr1493 G0:0051716 <1e-4 sl10886 G0:0005342 <1e-4 slr1258 G0:0044444 <1e-4 ss11255 G0:0016740 0.0261  
slr0455 G0:0009117 <1e-4 sl10198 G0:0051188 <1e-4 sl18027 G0:0016746 <1e-4 slr0325 G0:0005575 <1e-4 sl11095 G0:0008168 0.0261  
ssl1520 G0:0051186 <1e-4 sl10022 G0:0051179 <1e-4 sl11477 G0:0016818 <1e-4 sl11562 G0:0005575 <1e-4 slr0625 G0:0008168 0.0261  
sss2553 G0:0009199 <1e-4 slr0755 G0:0071496 <1e-4 slr1163 G0:0022838 <1e-4 slr2070 G0:0005575 <1e-4 slr8022 G0:0008168 0.0261  
slr1266 G0:0043436 <1e-4 ssl2595 G0:0043436 <1e-4 slr1875 G0:0016462 <1e-4 sl10645 G0:0043226 <1e-4 ss11918 G0:0008168 0.0261  
sl17066 G0:0051234 <1e-4 slr0609 G0:0009142 <1e-4 slr1315 G0:0015405 <1e-4 slr1612 G0:0043226 <1e-4 sl11785 G0:0008168 0.0261  
sl10585 G0:0080090 <1e-4 ssl1498 G0:0051347 <1e-4 sl17089 G0:0016746 <1e-4 slr1813 G0:0043226 <1e-4 ss15068 G0:0008168 0.0261  
sl10775 G0:0044255 <1e-4 slr1885 G0:0006220 <1e-4 slr6103 G0:0015077 <1e-4 slr0990 G0:0044464 <1e-4 slr1056 G0:0008168 0.0261  
sl11764 G0:0031323 <1e-4 slr0941 G0:0048519 <1e-4 slr1397 G0:0022890 <1e-4 sl10188 G0:0044446 <1e-4 sss6027 G0:0008168 0.0261  
slr1062 G0:0006576 <1e-4 slr1052 G0:0071841 <1e-4 ss11972 G0:0008171 <1e-4 slr1541 G0:0005575 <1e-4 sss6030 G0:0008168 0.0261  
sl11380 G0:0022607 <1e-4 slr1721 G0:0042180 <1e-4 slr1062 G0:0003674 <1e-4 sl10175 G0:0044425 <1e-4 ss10410 G0:0008168 0.0261  
sss2317 G0:0009161 <1e-4 slr0668 G0:0048518 <1e-4 ss13549 G0:0008171 <1e-4 slr1415 G0:0043226 <1e-4 slr7099 G0:0008168 0.0261  
ss18003 G0:0051186 <1e-4 slr0479 G0:0072527 <1e-4 ss10467 G0:0015267 <1e-4 sl11608 G0:0044424 <1e-4 sl11698 G0:0008168 0.0261  
slr1353 G0:0051234 <1e-4 slr6033 G0:0006091 <1e-4 sl10775 G0:0015293 <1e-4 ss12595 G0:0043226 <1e-4 sl10525 G0:0008168 0.0261  
sss2553 G0:0051716 <1e-4 ss10483 G0:0009260 <1e-4 ss15065 G0:0043167 <1e-4 sl10359 G0:0044422 <1e-4 slr7073 G0:0008168 0.0261  
sl11853 G0:0019219 <1e-4 slr6021 G0:0009132 <1e-4 sl10098 G0:0022838 <1e-4 sl10397 G0:0044446 <1e-4 slr0651 G0:0008168 0.0261  
sss2754 G0:0034654 <1e-4 slr1195 G0:0080090 <1e-4 slr1614 G0:0016741 <1e-4 slr5037 G0:0043226 <1e-4 sl11052 G0:0008168 0.0261  
sl10864 G0:0051818 <1e-4 sl11763 G0:0009987 <1e-4 slr0325 G0:0016746 <1e-4 slr1677 G0:0044425 <1e-4 slr6081 G0:0008168 0.0261  
slr1866 G0:0009889 <1e-4 slr0109 G0:0009117 <1e-4 sl17065 G0:0016746 <1e-4 sl17064 G0:0044444 <1e-4 sl10442 G0:0008168 0.0261  
slr1052 G0:0018130 <1e-4 slr0151 G0:0009199 <1e-4 slr1513 G0:0015293 <1e-4 slr1906 G0:0044444 <1e-4 sss0759 G0:0008168 0.0261  
sl10174 G0:0072521 <1e-4 sss0335 G0:0071554 <1e-4 sss2711 G0:0016746 <1e-4 slr1186 G0:0044425 <1e-4 sl10060 G0:0008168 0.0261  
sl10397 G0:0046483 <1e-4 sl11318 G0:0006082 <1e-4 sl10405 G0:0015399 <1e-4 slr0645 G0:0044444 <1e-4 slr5073 G0:0008168 0.0261  
slr0554 G0:0006163 <1e-4 slr1789 G0:0006082 <1e-4 ss17039 G0:0016462 <1e-4 slr0695 G0:0005575 <1e-4 sss8013 G0:0008168 0.0261  
sl11086 G0:0019222 <1e-4 slr1052 G0:0043933 <1e-4 slr1546 G0:0015077 <1e-4 sss2998 G0:0005575 <1e-4 sl11233 G0:0008168 0.0261  
slr6022 G0:0006082 <1e-4 sl17087 G0:0080090 <1e-4 sl10359 G0:0022890 <1e-4 sl10350 G0:0044422 <1e-4 sl11737 G0:0016740 0.0261  
slr1519 G0:0009056 <1e-4 sgl0001 G0:0046128 <1e-4 slr0765 G0:0042623 <1e-4 slr1816 G0:0044444 <1e-4 sss7079 G0:0008168 0.0261  
ss10294 G0:0051818 <1e-4 sl11714 G0:0043549 <1e-4 ss13573 G0:0015405 <1e-4 slr0921 G0:0044424 <1e-4 slr0708 G0:0008168 0.0261  
slr1940 G0:0051171 <1e-4 slr8021 G0:0042180 <1e-4 slr0789 G0:0015293 <1e-4 ss15099 G0:0044422 <1e-4 slr5111 G0:0008168 0.0261  
sl10670 G0:0048522 <1e-4 sl18032 G0:0009889 <1e-4 slr1557 G0:0015399 <1e-4 sl18007 G0:0005575 <1e-4 sl15128 G0:0008168 0.0261  
sl10524 G0:0019362 <1e-4 slr7092 G0:0008610 <1e-4 sl10436 G0:0016817 <1e-4 sl11092 G0:0043226 <1e-4 slr1236 G0:0008168 0.0261  
slr6064 G0:0009394 <1e-4 sss1391 G0:0052188 <1e-4 ss17051 G0:0022836 <1e-4 ss15096 G0:0005575 <1e-4 slr1944 G0:0008168 0.0261  
sl10286 G0:0042451 <1e-4 sss10739 G0:0019219 <1e-4 slr7083 G0:0043492 <1e-4 sl11415 G0:0044422 <1e-4 slr0813 G0:0008168 0.0261  
slr6014 G0:0016053 <1e-4 slr1273 G0:0009059 <1e-4 slr7098 G0:0022892 <1e-4 slr1196 G0:0043226 <1e-4 sl11106 G0:0008168 0.0261  
slr0651 G0:0071841 <1e-4 sl10867 G0:0042180 <1e-4 slr2105 G0:0016817 <1e-4 sl15003 G0:0044422 <1e-4 sl10839 G0:0008168 0.0261  
slr1613 G0:0055086 <1e-4 sss2142 G0:0031640 <1e-4 slr1780 G0:0022836 <1e-4 sss1528 G0:0005575 <1e-4 slr5037 G0:0008168 0.0261  
slr1600 G0:0046164 <1e-4 sss10242 G0:0009142 <1e-4 slr0195 G0:0015267 <1e-4 slr7096 G0:0044464 <1e-4 slr6044 G0:0008168 0.0261  
slr7092 G0:0080090 <1e-4 sl15109 G0:0009117 <1e-4 slr1535 G0:0022891 <1e-4 sl11698 G0:0043226 <1e-4 sl11702 G0:0008168 0.0261  
ss12996 G0:0051234 <1e-4 sss11464 G0:0046128 <1e-4 ss12733 G0:0043167 <1e-4 sl10286 G0:0044446 <1e-4 slr1819 G0:0008168 0.0261  
slr1032 G0:0019219 <1e-4 sss11004 G0:0034660 <1e-4 slr6073 G0:0008171 <1e-4 sss1256 G0:0043226 <1e-4 slr0914 G0:0008168 0.0261  
sl11254 G0:0019219 <1e-4 slr1174 G0:0009165 <1e-4 ss13291 G0:0016741 <1e-4 sl11960 G0:0005575 <1e-4 sss7084 G0:0008168 0.0261  
slr1619 G0:0009141 <1e-4 sl10319 G0:0043436 <1e-4 ss17051 G0:0003674 <1e-4 slr0787 G0:0044422 <1e-4 slr0689 G0:0008168 0.0261  
slr0058 G0:0044283 <1e-4 sl17064 G0:0044282 <1e-4 slr0479 G0:0016741 <1e-4 sl11702 G0:0044424 <1e-4 sl17034 G0:0008168 0.0261

|          |            |       |          |            |       |         |            |       |         |            |       |          |            |        |
|----------|------------|-------|----------|------------|-------|---------|------------|-------|---------|------------|-------|----------|------------|--------|
| sl110858 | G0:0052111 | <1e-4 | slr0318  | G0:0050794 | <1e-4 | slr1070 | G0:0016741 | <1e-4 | slr7014 | G0:0044424 | <1e-4 | sl11192  | G0:0008168 | 0.0261 |
| sl11373  | G0:0006721 | <1e-4 | slr1307  | G0:0009132 | <1e-4 | slr1778 | G0:0043167 | <1e-4 | slr0592 | G0:0044425 | <1e-4 | slr1623  | G0:0008168 | 0.0261 |
| slr1563  | G0:0072521 | <1e-4 | slr0482  | G0:0055114 | <1e-4 | slr0924 | G0:0022838 | <1e-4 | sl10933 | G0:0044424 | <1e-4 | sl10162  | G0:0008168 | 0.0261 |
| ssl1417  | G0:0055082 | <1e-4 | slr1315  | G0:0072522 | <1e-4 | slr0408 | G0:0022838 | <1e-4 | slr0818 | G0:0044424 | <1e-4 | slr1537  | G0:0008168 | 0.0261 |
| sl110702 | G0:0042180 | <1e-4 | slr1913  | G0:0006721 | <1e-4 | slr0092 | G0:0022832 | <1e-4 | slr1340 | G0:0005575 | <1e-4 | sl11089  | G0:0008168 | 0.0261 |
| ssr5074  | G0:0006733 | <1e-4 | slr1425  | G0:0009987 | <1e-4 | sl11632 | G0:0022838 | <1e-4 | slr0270 | G0:0005575 | <1e-4 | slr1206  | G0:0008168 | 0.0261 |
| slr1241  | G0:0008610 | <1e-4 | sl11654  | G0:0001932 | <1e-4 | sl10822 | G0:0022836 | <1e-4 | slr6087 | G0:0044444 | <1e-4 | sl10252  | G0:0017111 | 0.026  |
| sl11390  | G0:0043549 | <1e-4 | ssl5015  | G0:0006066 | <1e-4 | sl11063 | G0:0022832 | <1e-4 | sl10412 | G0:0044422 | <1e-4 | sl11562  | G0:0016772 | 0.0258 |
| sl11541  | G0:0009394 | <1e-4 | slr2084  | G0:0051347 | <1e-4 | slr0423 | G0:0015075 | <1e-4 | sl10419 | G0:0043226 | <1e-4 | slr1847  | G0:0016772 | 0.0258 |
| slr1262  | G0:0009117 | <1e-4 | slr6004  | G0:0009057 | <1e-4 | sl11632 | G0:0003674 | <1e-4 | slr0913 | G0:0005575 | <1e-4 | slr1851  | G0:0016772 | 0.0258 |
| sl15067  | G0:0034641 | <1e-4 | ssl5064  | G0:0043648 | <1e-4 | sl10737 | G0:0015075 | <1e-4 | sl11942 | G0:0044464 | <1e-4 | sl10558  | G0:0016772 | 0.0258 |
| slr7097  | G0:0034654 | <1e-4 | sl10913  | G0:0071840 | <1e-4 | ssl3379 | G0:0005342 | <1e-4 | sl10696 | G0:0043226 | <1e-4 | slr1301  | G0:0016772 | 0.0258 |
| ssr2755  | G0:0044106 | <1e-4 | slr1174  | G0:0071841 | <1e-4 | sl18027 | G0:0015399 | <1e-4 | slr1533 | G0:0044464 | <1e-4 | slr1811  | G0:0016772 | 0.0258 |
| sl11389  | G0:0009199 | <1e-4 | ssl0750  | G0:0006793 | <1e-4 | sl11433 | G0:0008171 | <1e-4 | slr2046 | G0:0044446 | <1e-4 | sl10783  | G0:0016772 | 0.0258 |
| ssl5099  | G0:0044003 | <1e-4 | ssl5007  | G0:0051716 | <1e-4 | sl11250 | G0:0015075 | <1e-4 | slr1920 | G0:0044424 | <1e-4 | sl10183  | G0:0016772 | 0.0258 |
| sl10060  | G0:0006631 | <1e-4 | slr1034  | G0:0044283 | <1e-4 | sg10001 | G0:0015399 | <1e-4 | sl11036 | G0:0005575 | <1e-4 | sl10505  | G0:0016772 | 0.0258 |
| slr1628  | G0:0048522 | <1e-4 | ssl5025  | G0:0046128 | <1e-4 | ssl2245 | G0:0003674 | <1e-4 | sl15033 | G0:0044444 | <1e-4 | slr1098  | G0:0016772 | 0.0258 |
| slr0065  | G0:0051188 | <1e-4 | ssl1498  | G0:0044260 | <1e-4 | sl11541 | G0:0016817 | <1e-4 | sl11853 | G0:0043226 | <1e-4 | slr0594  | G0:0016772 | 0.0258 |
| sl11009  | G0:0006066 | <1e-4 | slr7073  | G0:0051246 | <1e-4 | slr1885 | G0:0015399 | <1e-4 | sl11306 | G0:0044464 | <1e-4 | sl10614  | G0:0004518 | 0.0255 |
| sl10413  | G0:0018130 | <1e-4 | sl10524  | G0:0043170 | <1e-4 | slr0769 | G0:0015405 | <1e-4 | ssl0410 | G0:0005575 | <1e-4 | sl10588  | G0:0004518 | 0.0255 |
| sl11217  | G0:0009056 | <1e-4 | slr0913  | G0:0043648 | <1e-4 | slr0397 | G0:0015077 | <1e-4 | slr1638 | G0:0044425 | <1e-4 | slr1493  | G0:0004518 | 0.0255 |
| sl11680  | G0:0031640 | <1e-4 | slr1923  | G0:0009150 | <1e-4 | sl11766 | G0:0022891 | <1e-4 | slr1196 | G0:0044446 | <1e-4 | slr1541  | G0:0004518 | 0.0255 |
| sl10473  | G0:0010468 | <1e-4 | slr0498  | G0:0051188 | <1e-4 | slr2003 | G0:0015267 | <1e-4 | slr0655 | G0:0044422 | <1e-4 | slr0924  | G0:0004518 | 0.0255 |
| slr7094  | G0:0051171 | <1e-4 | slr7060  | G0:0072521 | <1e-4 | slr1813 | G0:0022832 | <1e-4 | ssl2420 | G0:0044446 | <1e-4 | sl10319  | G0:0004518 | 0.0255 |
| slr1885  | G0:0072521 | <1e-4 | sl15063  | G0:0006066 | <1e-4 | slr0789 | G0:0016462 | <1e-4 | slr0104 | G0:0044425 | <1e-4 | slr1053  | G0:0004518 | 0.0255 |
| sl17062  | G0:0009057 | <1e-4 | sl11634  | G0:0033013 | <1e-4 | slr1932 | G0:0016818 | <1e-4 | sl11109 | G0:0044424 | <1e-4 | sl17065  | G0:0004518 | 0.0255 |
| ssl3291  | G0:0043436 | <1e-4 | sl10098  | G0:0009142 | <1e-4 | slr0294 | G0:0022836 | <1e-4 | slr1035 | G0:0044425 | <1e-4 | sl11654  | G0:0004518 | 0.0255 |
| slr0517  | G0:0033013 | <1e-4 | sl16055  | G0:0051186 | <1e-4 | slr1353 | G0:0016746 | <1e-4 | slr0196 | G0:0044424 | <1e-4 | slr7024  | G0:0004518 | 0.0255 |
| sl11262  | G0:0051246 | <1e-4 | slr1449  | G0:0072527 | <1e-4 | sl11737 | G0:0015399 | <1e-4 | ssl5098 | G0:0044444 | <1e-4 | sl11350  | G0:0004518 | 0.0255 |
| slr0271  | G0:0051246 | <1e-4 | slr0742  | G0:0009150 | <1e-4 | ssl3615 | G0:0016462 | <1e-4 | slr0888 | G0:0044464 | <1e-4 | sl10359  | G0:0004518 | 0.0255 |
| slr1507  | G0:0044260 | <1e-4 | slr0065  | G0:0044271 | <1e-4 | slr6009 | G0:0015077 | <1e-4 | slr7011 | G0:0043226 | <1e-4 | sl10188  | G0:0004518 | 0.0255 |
| sl10310  | G0:0050801 | <1e-4 | slr1880  | G0:0009987 | <1e-4 | sl10783 | G0:0016462 | <1e-4 | sl11163 | G0:0044424 | <1e-4 | ssr3300  | G0:0004518 | 0.0255 |
| slr0810  | G0:0042180 | <1e-4 | ssl5007  | G0:0080090 | <1e-4 | slr0784 | G0:0003674 | <1e-4 | sl10984 | G0:0044446 | <1e-4 | slr1303  | G0:0004518 | 0.0255 |
| slr2060  | G0:0043412 | <1e-4 | sl11052  | G0:0009123 | <1e-4 | sl10614 | G0:0022890 | <1e-4 | sl10405 | G0:0044444 | <1e-4 | sl11072  | G0:0004518 | 0.0255 |
| slr0976  | G0:0050789 | <1e-4 | slr0172  | G0:0044003 | <1e-4 | sl10499 | G0:0042623 | <1e-4 | slr1704 | G0:0044422 | <1e-4 | slr1940  | G0:0004518 | 0.0255 |
| slr0364  | G0:0043412 | <1e-4 | slr0509  | G0:0050789 | <1e-4 | sl11938 | G0:0016817 | <1e-4 | slr1082 | G0:0043226 | <1e-4 | slr1668  | G0:0004518 | 0.0255 |
| ssr7072  | G0:0009987 | <1e-4 | slr0325  | G0:0072527 | <1e-4 | sl11464 | G0:0005342 | <1e-4 | slr1053 | G0:0043226 | <1e-4 | slr1690  | G0:0004518 | 0.0255 |
| slr1327  | G0:0048519 | <1e-4 | sl10147  | G0:0046128 | <1e-4 | sl10180 | G0:0022892 | <1e-4 | sl10860 | G0:0044425 | <1e-4 | sl11021  | G0:0004518 | 0.0255 |
| sl11424  | G0:0009892 | <1e-4 | slr5111  | G0:0042180 | <1e-4 | sl11979 | G0:0022803 | <1e-4 | slr5118 | G0:0044446 | <1e-4 | sl10888  | G0:0004518 | 0.0255 |
| slr0285  | G0:0044281 | <1e-4 | slr1262  | G0:0042180 | <1e-4 | slr1069 | G0:0015293 | <1e-4 | sl10786 | G0:0044464 | <1e-4 | sl10268  | G0:0004518 | 0.0255 |
| slr6051  | G0:0046128 | <1e-4 | slr1852  | G0:0031640 | <1e-4 | slr0655 | G0:0060089 | <1e-4 | slr1619 | G0:0044444 | <1e-4 | slr0664  | G0:0004518 | 0.0255 |
| slr1378  | G0:0022411 | <1e-4 | ssl2065  | G0:0048878 | <1e-4 | slr0935 | G0:0003674 | <1e-4 | ssl7039 | G0:0005575 | <1e-4 | ssr2754  | G0:0004518 | 0.0255 |
| slr5077  | G0:0048878 | <1e-4 | ssr2998  | G0:0046483 | <1e-4 | sl10068 | G0:0022838 | <1e-4 | ssl2717 | G0:0044446 | <1e-4 | slr1082  | G0:0004518 | 0.0255 |
| slr0586  | G0:0008150 | <1e-4 | slr1431  | G0:0034654 | <1e-4 | slr6091 | G0:0015399 | <1e-4 | slr0964 | G0:0005575 | <1e-4 | sl11225  | G0:0004518 | 0.0255 |
| slr6101  | G0:0009889 | <1e-4 | sl10875  | G0:0051186 | <1e-4 | sl10860 | G0:0043167 | <1e-4 | sl10815 | G0:0005575 | <1e-4 | sl10810  | G0:0004518 | 0.0255 |
| ssl2749  | G0:0009056 | <1e-4 | sl11240  | G0:0071842 | <1e-4 | slr1726 | G0:0016817 | <1e-4 | slr1493 | G0:0044446 | <1e-4 | slr1862  | G0:0004518 | 0.0255 |
| slr5126  | G0:0031323 | <1e-4 | slr1397  | G0:0072528 | <1e-4 | slr0656 | G0:0043492 | <1e-4 | sl11025 | G0:0044444 | <1e-4 | slr1647  | G0:0004518 | 0.0255 |
| slr1644  | G0:0006766 | <1e-4 | sl10639  | G0:0065007 | <1e-4 | slr2121 | G0:0043167 | <1e-4 | slr6029 | G0:0044422 | <1e-4 | sl11411  | G0:0004518 | 0.0255 |
| sl10249  | G0:0071554 | <1e-4 | sl18032  | G0:0006163 | <1e-4 | slr0392 | G0:0008171 | <1e-4 | slr0366 | G0:0043226 | <1e-4 | slr1544  | G0:0004518 | 0.0255 |
| slr2119  | G0:0022607 | <1e-4 | sl116052 | G0:0009165 | <1e-4 | slr7025 | G0:0022891 | <1e-4 | sl10101 | G0:0044464 | <1e-4 | sl110752 | G0:0004518 | 0.0255 |
| sl11960  | G0:0043933 | <1e-4 | slr1613  | G0:0044003 | <1e-4 | slr1484 | G0:0016746 | <1e-4 | sl11164 | G0:0044425 | <1e-4 | slr0172  | G0:0004518 | 0.0255 |
| slr0408  | G0:0072521 | <1e-4 | sl11203  | G0:0019751 | <1e-4 | ssr1375 | G0:0005342 | <1e-4 | sl11293 | G0:0044464 | <1e-4 | ssl0739  | G0:0004518 | 0.0255 |
| slr7058  | G0:0009892 | <1e-4 | slr0909  | G0:0043412 | <1e-4 | ssr5121 | G0:0015291 | <1e-4 | slr2000 | G0:0044424 | <1e-4 | slr1287  | G0:0004518 | 0.0255 |
| slr1914  | G0:0071842 | <1e-4 | sl10984  | G0:0043933 | <1e-4 | sl11109 | G0:0022832 | <1e-4 | slr1951 | G0:0044464 | <1e-4 | sl11201  | G0:0004518 | 0.0255 |

|         |            |       |         |            |       |         |            |       |         |            |       |         |            |        |
|---------|------------|-------|---------|------------|-------|---------|------------|-------|---------|------------|-------|---------|------------|--------|
| s111024 | G0:0009126 | <1e-4 | s111401 | G0:0006066 | <1e-4 | s111880 | G0:0016746 | <1e-4 | s110911 | G0:0005575 | <1e-4 | s111239 | G0:0004518 | 0.0255 |
| s110740 | G0:0044281 | <1e-4 | s1r0887 | G0:0050896 | <1e-4 | s1r2073 | G0:0015267 | <1e-4 | s1r0806 | G0:0044422 | <1e-4 | s1r0455 | G0:0004518 | 0.0255 |
| s110669 | G0:0009165 | <1e-4 | s110658 | G0:0009117 | <1e-4 | s1r0765 | G0:0022857 | <1e-4 | ss15065 | G0:0044444 | <1e-4 | s1r0935 | G0:0004518 | 0.0255 |
| s1r1809 | G0:0006732 | <1e-4 | s1r0374 | G0:0019751 | <1e-4 | s1r5077 | G0:0022803 | <1e-4 | s111426 | G0:0043226 | <1e-4 | s111752 | G0:0004518 | 0.0255 |
| s1r1066 | G0:0009161 | <1e-4 | s1r1045 | G0:0051347 | <1e-4 | s111965 | G0:0022838 | <1e-4 | s1r0650 | G0:0044464 | <1e-4 | s1r2115 | G0:0004518 | 0.0255 |
| s110518 | G0:0009150 | <1e-4 | s110243 | G0:0009199 | <1e-4 | ss10738 | G0:0015405 | <1e-4 | s111400 | G0:0044464 | <1e-4 | s110740 | G0:0004518 | 0.0255 |
| s111130 | G0:0051246 | <1e-4 | s110397 | G0:0006811 | <1e-4 | s1r0650 | G0:0022890 | <1e-4 | ssr6032 | G0:0044424 | <1e-4 | s1r0789 | G0:0004518 | 0.0255 |
| s1r0318 | G0:0009262 | <1e-4 | s1r1189 | G0:0006753 | <1e-4 | s115033 | G0:0016817 | <1e-4 | s1r1541 | G0:0044464 | <1e-4 | s1r0272 | G0:0004518 | 0.0255 |
| s1r2049 | G0:0051171 | <1e-4 | s1r1260 | G0:0009117 | <1e-4 | s110761 | G0:0022892 | <1e-4 | s1r0913 | G0:0044446 | <1e-4 | s111344 | G0:0004518 | 0.0255 |
| s1r1851 | G0:0018130 | <1e-4 | ss17007 | G0:0022607 | <1e-4 | s1r0729 | G0:0015405 | <1e-4 | ss11923 | G0:0044444 | <1e-4 | s1r0111 | G0:0004518 | 0.0255 |
| s111193 | G0:0065007 | <1e-4 | s1r7092 | G0:0034660 | <1e-4 | s1r0146 | G0:0016818 | <1e-4 | s1r1383 | G0:0043226 | <1e-4 | s111173 | G0:0004518 | 0.0255 |
| s110867 | G0:0016052 | <1e-4 | s1r1677 | G0:0031326 | <1e-4 | s111131 | G0:0022803 | <1e-4 | s111866 | G0:0005575 | <1e-4 | s1r0053 | G0:0004518 | 0.0255 |
| s1r0553 | G0:0048878 | <1e-4 | s111979 | G0:0080090 | <1e-4 | s1r1614 | G0:0015077 | <1e-4 | s110837 | G0:0005575 | <1e-4 | s110281 | G0:0004518 | 0.0255 |
| ss15031 | G0:0006220 | <1e-4 | s118040 | G0:0016053 | <1e-4 | s110424 | G0:0015291 | <1e-4 | ss10788 | G0:0044425 | <1e-4 | s110827 | G0:0004518 | 0.0255 |
| s1r1847 | G0:0022411 | <1e-4 | ss15091 | G0:0072528 | <1e-4 | s1r1097 | G0:0022857 | <1e-4 | s111530 | G0:0044464 | <1e-4 | s110410 | G0:0004518 | 0.0255 |
| s1r1576 | G0:0019222 | <1e-4 | s1r0111 | G0:0022411 | <1e-4 | s1r1827 | G0:0043167 | <1e-4 | s1r1601 | G0:0044424 | <1e-4 | s1r1070 | G0:0004518 | 0.0255 |
| s110547 | G0:0065007 | <1e-4 | s111222 | G0:0044283 | <1e-4 | s1r1397 | G0:0015075 | <1e-4 | s1r1726 | G0:0044444 | <1e-4 | s110996 | G0:0044237 | 0.0254 |
| s1r1932 | G0:0006721 | <1e-4 | s1r1907 | G0:0051234 | <1e-4 | s110479 | G0:0016817 | <1e-4 | s1r1927 | G0:0044446 | <1e-4 | ss10109 | G0:0044237 | 0.0254 |
| ss11255 | G0:0044271 | <1e-4 | s1r0049 | G0:0044255 | <1e-4 | s111656 | G0:0022803 | <1e-4 | ss10832 | G0:0044464 | <1e-4 | s1r0480 | G0:0044237 | 0.0254 |
| ss10109 | G0:0044275 | <1e-4 | s1r1206 | G0:0034654 | <1e-4 | s110886 | G0:0008171 | <1e-4 | s1r1073 | G0:0043226 | <1e-4 | s111318 | G0:0044237 | 0.0254 |
| s111960 | G0:0010556 | <1e-4 | s111446 | G0:0031323 | <1e-4 | ssr2998 | G0:0022891 | <1e-4 | s110413 | G0:0044424 | <1e-4 | s1r1505 | G0:0044237 | 0.0254 |
| s118027 | G0:0009142 | <1e-4 | s110297 | G0:0043648 | <1e-4 | s110048 | G0:0008171 | <1e-4 | ss11498 | G0:0044425 | <1e-4 | s111601 | G0:0044237 | 0.0254 |
| s110487 | G0:0009308 | <1e-4 | s111651 | G0:0042455 | <1e-4 | ss15025 | G0:0022836 | <1e-4 | s111092 | G0:0044424 | <1e-4 | ssr1375 | G0:0044237 | 0.0254 |
| s1r1612 | G0:0009308 | <1e-4 | s1r0271 | G0:0018130 | <1e-4 | s111866 | G0:0022890 | <1e-4 | s110449 | G0:0044464 | <1e-4 | s110499 | G0:0044237 | 0.0254 |
| s1r0656 | G0:0048518 | <1e-4 | s1r0887 | G0:0051179 | <1e-4 | ssr3300 | G0:0015077 | <1e-4 | s1r2003 | G0:0043226 | <1e-4 | s111135 | G0:0044237 | 0.0254 |
| ssr1114 | G0:0044003 | <1e-4 | ssr3570 | G0:0009056 | <1e-4 | s111938 | G0:0015399 | <1e-4 | s110263 | G0:0044424 | <1e-4 | s110360 | G0:0044237 | 0.0254 |
| ssr2972 | G0:0009263 | <1e-4 | s111722 | G0:0048878 | <1e-4 | s1r7096 | G0:0016462 | <1e-4 | s110149 | G0:0044446 | <1e-4 | s111247 | G0:0044237 | 0.0254 |
| ss15099 | G0:0009126 | <1e-4 | ss11577 | G0:0009144 | <1e-4 | s118032 | G0:0043492 | <1e-4 | s1r0300 | G0:0044425 | <1e-4 | s110547 | G0:0044237 | 0.0254 |
| s111219 | G0:0009132 | <1e-4 | ssr0536 | G0:0019752 | <1e-4 | s110192 | G0:0042623 | <1e-4 | s1r0645 | G0:0044424 | <1e-4 | s1r1127 | G0:0044237 | 0.0254 |
| s1r0957 | G0:0022607 | <1e-4 | s110022 | G0:0009141 | <1e-4 | s1r0909 | G0:0022891 | <1e-4 | s1r0655 | G0:0044444 | <1e-4 | s1r0304 | G0:0044237 | 0.0254 |
| s1r2125 | G0:0050789 | <1e-4 | s110641 | G0:0031323 | <1e-4 | ss17048 | G0:0015399 | <1e-4 | s1r1261 | G0:0044464 | <1e-4 | s110508 | G0:0044237 | 0.0254 |
| s111606 | G0:0046394 | <1e-4 | s110176 | G0:0006732 | <1e-4 | s110188 | G0:0043167 | <1e-4 | s1r0605 | G0:0044425 | <1e-4 | s1r0876 | G0:0044237 | 0.0254 |
| s1r1914 | G0:0006732 | <1e-4 | ssr0102 | G0:0006163 | <1e-4 | s1r1438 | G0:0016462 | <1e-4 | ssr5020 | G0:0044425 | <1e-4 | ss13692 | G0:0044237 | 0.0254 |
| s111638 | G0:0016054 | <1e-4 | s1r0588 | G0:0046128 | <1e-4 | s110614 | G0:0015291 | <1e-4 | s1r1194 | G0:0044424 | <1e-4 | s1r0287 | G0:0044237 | 0.0254 |
| s1r0957 | G0:0052111 | <1e-4 | ssr2439 | G0:0044271 | <1e-4 | s110608 | G0:0022838 | <1e-4 | s110740 | G0:0005575 | <1e-4 | s110296 | G0:0044237 | 0.0254 |
| s111164 | G0:0009165 | <1e-4 | ssr3154 | G0:0055082 | <1e-4 | s111188 | G0:0003674 | <1e-4 | s110886 | G0:0005575 | <1e-4 | s110283 | G0:0044237 | 0.0254 |
| s1r1306 | G0:0009260 | <1e-4 | ssr2802 | G0:0009394 | <1e-4 | s1r0589 | G0:0016818 | <1e-4 | s1r0650 | G0:0044444 | <1e-4 | s1r0937 | G0:0044237 | 0.0254 |
| s1r5053 | G0:0072522 | <1e-4 | s110147 | G0:0022607 | <1e-4 | s1r2084 | G0:0043492 | <1e-4 | s1r1429 | G0:0005575 | <1e-4 | s1r0299 | G0:0044237 | 0.0254 |
| s1r0725 | G0:0043648 | <1e-4 | s1r0625 | G0:0019219 | <1e-4 | s1r1301 | G0:0015077 | <1e-4 | ssr6078 | G0:0005575 | <1e-4 | s110274 | G0:0044237 | 0.0254 |
| s1r1906 | G0:0009889 | <1e-4 | s110932 | G0:0043549 | <1e-4 | s111979 | G0:0043492 | <1e-4 | s1r1069 | G0:0044424 | <1e-4 | s110854 | G0:0044237 | 0.0254 |
| s1r1474 | G0:0018130 | <1e-4 | s110761 | G0:0031323 | <1e-4 | s1r2125 | G0:0016746 | <1e-4 | s110710 | G0:0005575 | <1e-4 | s112006 | G0:0044237 | 0.0254 |
| s1r1886 | G0:0006811 | <1e-4 | ss12245 | G0:0080090 | <1e-4 | s118033 | G0:0022838 | <1e-4 | s110022 | G0:0044464 | <1e-4 | s110301 | G0:0044237 | 0.0254 |
| s1r0217 | G0:0043549 | <1e-4 | s110297 | G0:0009262 | <1e-4 | s1r7073 | G0:0060089 | <1e-4 | s1r1644 | G0:0044446 | <1e-4 | s1r1073 | G0:0044237 | 0.0253 |
| s118002 | G0:0050896 | <1e-4 | s110238 | G0:0051188 | <1e-4 | ss11464 | G0:0015075 | <1e-4 | s1r0456 | G0:0044446 | <1e-4 | s111002 | G0:0044237 | 0.0253 |
| ssr6079 | G0:0043412 | <1e-4 | s111433 | G0:0008610 | <1e-4 | s110069 | G0:0015291 | <1e-4 | s117069 | G0:0044424 | <1e-4 | s1r1638 | G0:0044237 | 0.0253 |
| s111691 | G0:0006720 | <1e-4 | ss10832 | G0:0050789 | <1e-4 | s118027 | G0:0060089 | <1e-4 | s1r0264 | G0:0005575 | <1e-4 | s1r0519 | G0:0044237 | 0.0253 |
| s111433 | G0:0051234 | <1e-4 | s1r6068 | G0:0052111 | <1e-4 | s1r0651 | G0:0022891 | <1e-4 | s111681 | G0:0044464 | <1e-4 | s1r0386 | G0:0044237 | 0.0253 |
| s1r0978 | G0:0044281 | <1e-4 | ss12920 | G0:0006720 | <1e-4 | s111530 | G0:0043167 | <1e-4 | s110984 | G0:0005575 | <1e-4 | s110314 | G0:0044237 | 0.0253 |
| s110602 | G0:0006163 | <1e-4 | s1r0845 | G0:0044275 | <1e-4 | s110066 | G0:0060089 | <1e-4 | s110167 | G0:0044425 | <1e-4 | s110066 | G0:0044237 | 0.0253 |
| s111730 | G0:0048519 | <1e-4 | ssr3571 | G0:0008150 | <1e-4 | ssr6099 | G0:0022857 | <1e-4 | ss13383 | G0:0044444 | <1e-4 | s1r1593 | G0:0044237 | 0.0253 |
| s1r0455 | G0:0071841 | <1e-4 | ss10787 | G0:0044260 | <1e-4 | s111925 | G0:0022890 | <1e-4 | s110788 | G0:0005575 | <1e-4 | s110007 | G0:0044237 | 0.0253 |
| s110482 | G0:0009394 | <1e-4 | s1r0480 | G0:0009132 | <1e-4 | s1r1614 | G0:0016817 | <1e-4 | s110314 | G0:0044464 | <1e-4 | s1r1262 | G0:0044237 | 0.0253 |
| ssr1375 | G0:0051234 | <1e-4 | ssr5011 | G0:0052111 | <1e-4 | s1r0821 | G0:0015267 | <1e-4 | s110688 | G0:0044422 | <1e-4 | s111656 | G0:0044237 | 0.0253 |
| ss12733 | G0:0072524 | <1e-4 | s1r1964 | G0:0009126 | <1e-4 | s1r0482 | G0:0003674 | <1e-4 | ss12148 | G0:0043226 | <1e-4 | s1r0586 | G0:0044237 | 0.0253 |

|          |            |       |          |            |       |          |            |       |          |            |       |          |            |        |
|----------|------------|-------|----------|------------|-------|----------|------------|-------|----------|------------|-------|----------|------------|--------|
| slr0813  | GO:0022411 | <le-4 | sl11062  | GO:0051188 | <le-4 | sl110101 | GO:0008171 | <le-4 | slr1519  | GO:0005575 | <le-4 | sl11954  | GO:0044237 | 0.0253 |
| slr0637  | GO:0042180 | <le-4 | slr1900  | GO:0006082 | <le-4 | sl11949  | GO:0022836 | <le-4 | sl11381  | GO:0005575 | <le-4 | sl11530  | GO:0044237 | 0.0253 |
| ssl1690  | GO:0006721 | <le-4 | slr0058  | GO:0080090 | <le-4 | slr1223  | GO:0003674 | <le-4 | slr0489  | GO:0043226 | <le-4 | sl11061  | GO:0044237 | 0.0253 |
| slr2012  | GO:0009394 | <le-4 | ssl0461  | GO:0072524 | <le-4 | sl110656 | GO:0015405 | <le-4 | slr0053  | GO:0044424 | <le-4 | slr1648  | GO:0044237 | 0.0253 |
| ssl3291  | GO:0055082 | <le-4 | slr6012  | GO:0048522 | <le-4 | sl111472 | GO:0022838 | <le-4 | sl117069 | GO:0005575 | <le-4 | sl110191 | GO:0044237 | 0.0253 |
| sl11160  | GO:0046483 | <le-4 | slr0957  | GO:0048878 | <le-4 | sl110858 | GO:0008171 | <le-4 | slr1194  | GO:0044464 | <le-4 | ssr3122  | GO:0044237 | 0.0253 |
| slr2070  | GO:0090304 | <le-4 | slr0299  | GO:0051234 | <le-4 | sl111726 | GO:0005342 | <le-4 | sl110615 | GO:0044446 | <le-4 | slr1230  | GO:0044237 | 0.0253 |
| ssl15103 | GO:0050794 | <le-4 | slr0699  | GO:0071554 | <le-4 | slr6075  | GO:0022892 | <le-4 | sl11429  | GO:0005575 | <le-4 | sl110676 | GO:0044237 | 0.0253 |
| slr6066  | GO:0009126 | <le-4 | ssl15100 | GO:0009259 | <le-4 | slr0581  | GO:0016746 | <le-4 | sl11530  | GO:0043226 | <le-4 | slr0360  | GO:0044237 | 0.0253 |
| ssr7072  | GO:0034660 | <le-4 | slr7057  | GO:0044260 | <le-4 | slr0483  | GO:0022803 | <le-4 | slr2042  | GO:0044424 | <le-4 | ssl1577  | GO:0044237 | 0.0253 |
| ssl15114 | GO:0034641 | <le-4 | slr1657  | GO:0019222 | <le-4 | slr0821  | GO:0022857 | <le-4 | slr0755  | GO:0044422 | <le-4 | slr1572  | GO:0044237 | 0.0253 |
| ssl0467  | GO:0006811 | <le-4 | slr1958  | GO:0009262 | <le-4 | slr1258  | GO:0022891 | <le-4 | sl110590 | GO:0044424 | <le-4 | sl11315  | GO:0044237 | 0.0253 |
| slr1338  | GO:0072524 | <le-4 | slr1920  | GO:0005996 | <le-4 | slr1110  | GO:0016818 | <le-4 | sl110384 | GO:0044425 | <le-4 | sl110780 | GO:0044237 | 0.0253 |
| ssr6027  | GO:0052111 | <le-4 | ssr3532  | GO:0072527 | <le-4 | sl110586 | GO:0015399 | <le-4 | sl110309 | GO:0044446 | <le-4 | sl111675 | GO:0044237 | 0.0253 |
| slr0360  | GO:0042180 | <le-4 | ssl1046  | GO:0044283 | <le-4 | ss10350  | GO:0016462 | <le-4 | sl11340  | GO:0044425 | <le-4 | sl110524 | GO:0044237 | 0.0253 |
| sl17047  | GO:0009056 | <le-4 | sl11880  | GO:0042180 | <le-4 | sl111414 | GO:0016817 | <le-4 | sl11722  | GO:0005575 | <le-4 | sl110497 | GO:0044237 | 0.0253 |
| sl11318  | GO:0043933 | <le-4 | sg10002  | GO:0044271 | <le-4 | sl111609 | GO:0015405 | <le-4 | sl110670 | GO:0044422 | <le-4 | sl110360 | GO:0016820 | 0.025  |
| sl18002  | GO:0019222 | <le-4 | sl15132  | GO:0031326 | <le-4 | slr0909  | GO:0016746 | <le-4 | sl11378  | GO:0044444 | <le-4 | sl11318  | GO:0016820 | 0.025  |
| sl11942  | GO:0060255 | <le-4 | slr1442  | GO:0009126 | <le-4 | slr6088  | GO:0016741 | <le-4 | slr1081  | GO:0044446 | <le-4 | slr2025  | GO:0016820 | 0.025  |
| slr1495  | GO:0009892 | <le-4 | sl11426  | GO:0051179 | <le-4 | sl111267 | GO:0043492 | <le-4 | sl11573  | GO:0005575 | <le-4 | slr1417  | GO:0016820 | 0.025  |
| slr0605  | GO:0009991 | <le-4 | slr1668  | GO:0006753 | <le-4 | ssr2972  | GO:0015267 | <le-4 | slr1951  | GO:0005575 | <le-4 | slr1376  | GO:0016820 | 0.025  |
| sl110241 | GO:0006733 | <le-4 | sl11239  | GO:0019752 | <le-4 | ssr1375  | GO:0015267 | <le-4 | slr7015  | GO:0044422 | <le-4 | slr1391  | GO:0016820 | 0.025  |
| slr1956  | GO:0046128 | <le-4 | slr0157  | GO:0052111 | <le-4 | slr1053  | GO:0060089 | <le-4 | slr0060  | GO:0043226 | <le-4 | ssr1698  | GO:0016820 | 0.025  |
| slr7081  | GO:0009889 | <le-4 | slr1789  | GO:0071554 | <le-4 | slr1394  | GO:0015405 | <le-4 | slr0889  | GO:0005575 | <le-4 | sl11455  | GO:0016820 | 0.025  |
| sl11995  | GO:0034641 | <le-4 | sl110249 | GO:0019219 | <le-4 | ssr6083  | GO:0022890 | <le-4 | ssl2971  | GO:0044425 | <le-4 | slr1659  | GO:0016820 | 0.025  |
| sl11267  | GO:0019362 | <le-4 | slr7092  | GO:0051716 | <le-4 | slr0845  | GO:0043492 | <le-4 | ss18008  | GO:0005575 | <le-4 | sl11218  | GO:0016820 | 0.025  |
| slr1287  | GO:0016054 | <le-4 | slr0551  | GO:0006811 | <le-4 | slr1657  | GO:0043167 | <le-4 | slr5016  | GO:0005575 | <le-4 | slr0287  | GO:0016820 | 0.025  |
| sl11442  | GO:0009260 | <le-4 | slr1914  | GO:0009259 | <le-4 | sl110702 | GO:0015267 | <le-4 | slr0355  | GO:0044424 | <le-4 | sl11426  | GO:0016820 | 0.025  |
| sl111123 | GO:0072522 | <le-4 | sl110174 | GO:0008150 | <le-4 | slr7014  | GO:0015399 | <le-4 | sl11979  | GO:0044424 | <le-4 | sl110382 | GO:0016820 | 0.025  |
| sl110446 | GO:0031640 | <le-4 | slr6049  | GO:0043933 | <le-4 | sl110444 | GO:0003674 | <le-4 | sl110543 | GO:0044464 | <le-4 | sl110864 | GO:0016820 | 0.025  |
| sl110846 | GO:0051716 | <le-4 | slr1977  | GO:0031323 | <le-4 | slr1970  | GO:0022832 | <le-4 | slr1169  | GO:0043226 | <le-4 | slr1900  | GO:0016820 | 0.025  |
| ssr3572  | GO:0022607 | <le-4 | slr1384  | GO:0034660 | <le-4 | sl111173 | GO:0015077 | <le-4 | slr1799  | GO:0005575 | <le-4 | slr0871  | GO:0016820 | 0.025  |
| ssl2920  | GO:0001932 | <le-4 | sl11601  | GO:0071842 | <le-4 | ssr8013  | GO:0022857 | <le-4 | sl110354 | GO:0043226 | <le-4 | sl11942  | GO:0016820 | 0.025  |
| slr0058  | GO:0009141 | <le-4 | sl11219  | GO:0044106 | <le-4 | slr11103 | GO:0008171 | <le-4 | slr1170  | GO:0005575 | <le-4 | slr1127  | GO:0016820 | 0.025  |
| sl11715  | GO:0009262 | <le-4 | sl110995 | GO:0009142 | <le-4 | slr1259  | GO:0022836 | <le-4 | slr1327  | GO:0044424 | <le-4 | slr1896  | GO:0016820 | 0.025  |
| sl110281 | GO:0009117 | <le-4 | slr1573  | GO:0072521 | <le-4 | sl110183 | GO:0016741 | <le-4 | slr0601  | GO:0044446 | <le-4 | sl12006  | GO:0016820 | 0.025  |
| sl111573 | GO:0031323 | <le-4 | sl110780 | GO:0042455 | <le-4 | sl117077 | GO:0060089 | <le-4 | sl11262  | GO:0044444 | <le-4 | slr1083  | GO:0016820 | 0.025  |
| slr1623  | GO:0044106 | <le-4 | ssl6061  | GO:0055114 | <le-4 | slr7025  | GO:0015077 | <le-4 | sl11749  | GO:0043226 | <le-4 | sl110854 | GO:0016820 | 0.025  |
| sl110230 | GO:0006220 | <le-4 | slr2103  | GO:0044281 | <le-4 | slr7026  | GO:0016462 | <le-4 | slr1681  | GO:0043226 | <le-4 | sl111174 | GO:0016820 | 0.025  |
| slr1623  | GO:0044260 | <le-4 | sl11485  | GO:0071496 | <le-4 | ssl5008  | GO:0015399 | <le-4 | sl11630  | GO:0005575 | <le-4 | slr0250  | GO:0016820 | 0.025  |
| slr2118  | GO:0033013 | <le-4 | slr7091  | GO:0006733 | <le-4 | slr2111  | GO:0022892 | <le-4 | sl110867 | GO:0044446 | <le-4 | slr1505  | GO:0016820 | 0.025  |
| sg10002  | GO:0052111 | <le-4 | sl117077 | GO:0009893 | <le-4 | sl111130 | GO:0016817 | <le-4 | slr0588  | GO:0043226 | <le-4 | ssr0536  | GO:0016820 | 0.025  |
| slr1704  | GO:0010468 | <le-4 | ssl2162  | GO:0042451 | <le-4 | sl110060 | GO:0015293 | <le-4 | sl11401  | GO:0043226 | <le-4 | ssr3572  | GO:0044237 | 0.0242 |
| slr1998  | GO:0008610 | <le-4 | sl11527  | GO:0065007 | <le-4 | sl110449 | GO:0015405 | <le-4 | sl118040 | GO:0005575 | <le-4 | ssr2067  | GO:0044237 | 0.0242 |
| slr1103  | GO:0009889 | <le-4 | sl11583  | GO:0042180 | <le-4 | slr0921  | GO:0015077 | <le-4 | ssr2754  | GO:0043226 | <le-4 | ssl2162  | GO:0044237 | 0.0242 |
| slr2060  | GO:0051818 | <le-4 | ssl5096  | GO:0034641 | <le-4 | slr0516  | GO:0015405 | <le-4 | sl110913 | GO:0043226 | <le-4 | ssr1473  | GO:0044237 | 0.0242 |
| sl110286 | GO:0048522 | <le-4 | sl11203  | GO:0065007 | <le-4 | ssr2142  | GO:0016817 | <le-4 | ssl10109 | GO:0043226 | <le-4 | slr0725  | GO:0044237 | 0.0242 |
| sl110995 | GO:0006721 | <le-4 | slr0109  | GO:0051171 | <le-4 | slr0948  | GO:0022836 | <le-4 | sl11606  | GO:0044444 | <le-4 | slr0865  | GO:0044237 | 0.0242 |
| ssr2333  | GO:0034641 | <le-4 | slr1778  | GO:0009309 | <le-4 | sl11461  | GO:0022838 | <le-4 | slr1207  | GO:0044424 | <le-4 | ssr2553  | GO:0044237 | 0.0242 |
| sl110756 | GO:0072524 | <le-4 | ssr6083  | GO:0048523 | <le-4 | ssl2064  | GO:0016741 | <le-4 | slr1599  | GO:0044422 | <le-4 | slr0416  | GO:0044237 | 0.0242 |
| sl110085 | GO:0044275 | <le-4 | sl110436 | GO:0009309 | <le-4 | sl111832 | GO:0005342 | <le-4 | ssr2060  | GO:0043226 | <le-4 | ssr6089  | GO:0044237 | 0.0242 |
| sl111092 | GO:0048518 | <le-4 | slr1110  | GO:0016054 | <le-4 | slr0588  | GO:0015077 | <le-4 | sl111873 | GO:0005575 | <le-4 | slr5127  | GO:0044237 | 0.0242 |
| slr0921  | GO:0016054 | <le-4 | slr5126  | GO:0051246 | <le-4 | sl110586 | GO:0060089 | <le-4 | slr0863  | GO:0044422 | <le-4 | ssr2047  | GO:0044237 | 0.0242 |
| ssl2064  | GO:0019219 | <le-4 | slr5012  | GO:0065007 | <le-4 | sl111730 | GO:0043492 | <le-4 | sl111717 | GO:0043226 | <le-4 | ssl3615  | GO:0044237 | 0.0242 |



|         |            |       |         |            |       |          |            |       |         |            |       |         |            |        |
|---------|------------|-------|---------|------------|-------|----------|------------|-------|---------|------------|-------|---------|------------|--------|
| slr0801 | G0:0052111 | <1e-4 | slr2105 | G0:0034641 | <1e-4 | s111925  | G0:0060089 | <1e-4 | slr1906 | G0:0044425 | <1e-4 | slr7010 | G0:0044237 | 0.0242 |
| ssr2333 | G0:0009056 | <1e-4 | slr0207 | G0:0006753 | <1e-4 | slr0305  | G0:0016462 | <1e-4 | ssr1768 | G0:0005575 | <1e-4 | s111486 | G0:0044237 | 0.0242 |
| slr0594 | G0:0043412 | <1e-4 | slr6075 | G0:0009144 | <1e-4 | s112011  | G0:0016462 | <1e-4 | sl10703 | G0:0043226 | <1e-4 | ss15025 | G0:0044237 | 0.0242 |
| slr1591 | G0:0046164 | <1e-4 | s110810 | G0:0031323 | <1e-4 | slr0059  | G0:0022892 | <1e-4 | s111765 | G0:0005575 | <1e-4 | s118001 | G0:0044237 | 0.0242 |
| slr1667 | G0:0006732 | <1e-4 | s115028 | G0:0009889 | <1e-4 | slr2073  | G0:0042623 | <1e-4 | s110022 | G0:0044446 | <1e-4 | slr1406 | G0:0044237 | 0.0242 |
| slr0300 | G0:0043549 | <1e-4 | s110995 | G0:0044106 | <1e-4 | slr1209  | G0:0016462 | <1e-4 | ssr2439 | G0:0043226 | <1e-4 | ssr2060 | G0:0044237 | 0.0242 |
| s111510 | G0:0009394 | <1e-4 | slr1484 | G0:0044281 | <1e-4 | slr6067  | G0:0060089 | <1e-4 | ss10467 | G0:0044464 | <1e-4 | s118019 | G0:0044237 | 0.0242 |
| slr1911 | G0:0009056 | <1e-4 | slr0989 | G0:0043549 | <1e-4 | s117050  | G0:0022857 | <1e-4 | s110822 | G0:0043226 | <1e-4 | slr5024 | G0:0044237 | 0.0242 |
| s110369 | G0:0051716 | <1e-4 | slr0407 | G0:0072521 | <1e-4 | slr2003  | G0:0043492 | <1e-4 | slr0483 | G0:0044424 | <1e-4 | ssr2975 | G0:0044237 | 0.0242 |
| ss15008 | G0:0009199 | <1e-4 | slr6016 | G0:0034654 | <1e-4 | slr1082  | G0:0016817 | <1e-4 | slr1207 | G0:0044444 | <1e-4 | slr1438 | G0:0044237 | 0.0242 |
| slr1437 | G0:0055082 | <1e-4 | slr7073 | G0:0009126 | <1e-4 | s110085  | G0:0043492 | <1e-4 | slr0109 | G0:0043226 | <1e-4 | slr5012 | G0:0044237 | 0.0242 |
| s111193 | G0:0009893 | <1e-4 | slr1659 | G0:0042180 | <1e-4 | s111630  | G0:0022832 | <1e-4 | slr2037 | G0:0044425 | <1e-4 | slr6075 | G0:0044237 | 0.0242 |
| slr1186 | G0:0031323 | <1e-4 | ss17074 | G0:0051818 | <1e-4 | s110410  | G0:0016746 | <1e-4 | s110189 | G0:0044425 | <1e-4 | slr5016 | G0:0044237 | 0.0242 |
| ssr0657 | G0:0034654 | <1e-4 | s115028 | G0:0016053 | <1e-4 | ss15096  | G0:0022803 | <1e-4 | s115061 | G0:0005575 | <1e-4 | s110335 | G0:0044237 | 0.0242 |
| s111062 | G0:0022411 | <1e-4 | slr0250 | G0:0031323 | <1e-4 | ssr3129  | G0:0043167 | <1e-4 | slr0106 | G0:0044464 | <1e-4 | slr0303 | G0:0044237 | 0.0242 |
| slr1117 | G0:0048878 | <1e-4 | slr6074 | G0:0048519 | <1e-4 | slr0888  | G0:0042623 | <1e-4 | ssr5019 | G0:0044425 | <1e-4 | s110069 | G0:0044237 | 0.0242 |
| ssr6062 | G0:0009893 | <1e-4 | slr0291 | G0:0009991 | <1e-4 | slr0169  | G0:0016818 | <1e-4 | slr2084 | G0:0005575 | <1e-4 | s110372 | G0:0044237 | 0.0242 |
| ssr1375 | G0:0042455 | <1e-4 | s111630 | G0:0009262 | <1e-4 | s115034  | G0:0022890 | <1e-4 | slr1614 | G0:0005575 | <1e-4 | ss15103 | G0:0044237 | 0.0242 |
| slr0654 | G0:0009889 | <1e-4 | s110804 | G0:0051179 | <1e-4 | slr0169  | G0:0022832 | <1e-4 | s110793 | G0:0005575 | <1e-4 | s111340 | G0:0044237 | 0.0242 |
| s110274 | G0:0006753 | <1e-4 | s117067 | G0:0006576 | <1e-4 | s111638  | G0:0016817 | <1e-4 | slr0712 | G0:0044444 | <1e-4 | slr1752 | G0:0044237 | 0.0242 |
| s110563 | G0:0031323 | <1e-4 | slr6063 | G0:0019362 | <1e-4 | s110101  | G0:0015077 | <1e-4 | s111201 | G0:0044424 | <1e-4 | slr1290 | G0:0044237 | 0.0242 |
| slr0217 | G0:0072524 | <1e-4 | s111162 | G0:0006793 | <1e-4 | slr1944  | G0:0022838 | <1e-4 | slr0981 | G0:0044444 | <1e-4 | s110847 | G0:0044237 | 0.0242 |
| slr0742 | G0:0065007 | <1e-4 | s110595 | G0:0043933 | <1e-4 | slr6015  | G0:0043167 | <1e-4 | s111036 | G0:0044446 | <1e-4 | slr7073 | G0:0044237 | 0.0242 |
| slr0270 | G0:0052188 | <1e-4 | slr1768 | G0:0048519 | <1e-4 | s111315  | G0:0016817 | <1e-4 | ssr6020 | G0:0044422 | <1e-4 | s111321 | G0:0044237 | 0.0242 |
| s117047 | G0:0044260 | <1e-4 | slr0291 | G0:0048519 | <1e-4 | ssr0336  | G0:0003674 | <1e-4 | s110023 | G0:0044422 | <1e-4 | s117028 | G0:0044237 | 0.0242 |
| s111835 | G0:0010468 | <1e-4 | s110839 | G0:0051347 | <1e-4 | s117033  | G0:0022836 | <1e-4 | slr1290 | G0:0044422 | <1e-4 | slr7060 | G0:0044237 | 0.0242 |
| ss12148 | G0:0044271 | <1e-4 | slr1774 | G0:0009132 | <1e-4 | s111880  | G0:0016818 | <1e-4 | s111764 | G0:0044444 | <1e-4 | slr8044 | G0:0044237 | 0.0242 |
| slr0103 | G0:0050801 | <1e-4 | s110861 | G0:0022411 | <1e-4 | s111530  | G0:0022803 | <1e-4 | s111488 | G0:0005575 | <1e-4 | slr1704 | G0:0044237 | 0.0242 |
| slr0516 | G0:0009161 | <1e-4 | slr1114 | G0:0006793 | <1e-4 | slr1103  | G0:0003674 | <1e-4 | slr2110 | G0:0044425 | <1e-4 | slr6088 | G0:0044237 | 0.0242 |
| s111289 | G0:0046907 | <1e-4 | slr8044 | G0:0010468 | <1e-4 | slr2052  | G0:0015077 | <1e-4 | s110980 | G0:0044422 | <1e-4 | slr0270 | G0:0044237 | 0.0242 |
| s111164 | G0:0009309 | <1e-4 | slr0602 | G0:0009259 | <1e-4 | slr1624  | G0:0015399 | <1e-4 | slr1702 | G0:0043226 | <1e-4 | s110905 | G0:0044237 | 0.0242 |
| slr0845 | G0:0072521 | <1e-4 | slr2048 | G0:0022607 | <1e-4 | slr0356  | G0:0008171 | <1e-4 | slr0872 | G0:0044424 | <1e-4 | slr7094 | G0:0044237 | 0.0242 |
| slr0821 | G0:0009259 | <1e-4 | ssr1766 | G0:0006721 | <1e-4 | s110597  | G0:0016818 | <1e-4 | slr6045 | G0:0044425 | <1e-4 | slr5037 | G0:0044237 | 0.0242 |
| slr0374 | G0:0051716 | <1e-4 | slr1206 | G0:0052188 | <1e-4 | s110608  | G0:0022890 | <1e-4 | slr1990 | G0:0044425 | <1e-4 | s110101 | G0:0044237 | 0.0242 |
| s110843 | G0:0051716 | <1e-4 | s110424 | G0:0009308 | <1e-4 | s110023  | G0:0060089 | <1e-4 | s111938 | G0:0044464 | <1e-4 | s110543 | G0:0044237 | 0.0242 |
| slr0172 | G0:0072522 | <1e-4 | slr0575 | G0:0010468 | <1e-4 | ss11255  | G0:0022803 | <1e-4 | slr0121 | G0:0044424 | <1e-4 | slr1206 | G0:0044237 | 0.0242 |
| s111021 | G0:0043648 | <1e-4 | slr1911 | G0:0042451 | <1e-4 | ssr2009  | G0:0042623 | <1e-4 | s110441 | G0:0005575 | <1e-4 | slr1990 | G0:0044237 | 0.0242 |
| slr7096 | G0:0009394 | <1e-4 | slr0598 | G0:0031323 | <1e-4 | s111563  | G0:0015077 | <1e-4 | slr0937 | G0:0044425 | <1e-4 | s111009 | G0:0044237 | 0.0242 |
| s116053 | G0:0009259 | <1e-4 | s111219 | G0:0009991 | <1e-4 | s110350  | G0:0022857 | <1e-4 | ssr1407 | G0:0044425 | <1e-4 | slr0326 | G0:0044237 | 0.0242 |
| slr0148 | G0:0071842 | <1e-4 | ss11498 | G0:0008610 | <1e-4 | s110361  | G0:0060089 | <1e-4 | s110005 | G0:0044425 | <1e-4 | s111319 | G0:0044237 | 0.0242 |
| s110174 | G0:0019637 | <1e-4 | slr1573 | G0:0042180 | <1e-4 | s111272  | G0:0005342 | <1e-4 | slr0975 | G0:0044446 | <1e-4 | s111142 | G0:0044237 | 0.0242 |
| ss12138 | G0:0052111 | <1e-4 | s111891 | G0:0006811 | <1e-4 | slr0358  | G0:0043492 | <1e-4 | s110478 | G0:0044424 | <1e-4 | slr0816 | G0:0044237 | 0.0242 |
| slr0787 | G0:0031326 | <1e-4 | slr0207 | G0:0051188 | <1e-4 | slr5012  | G0:0015293 | <1e-4 | slr1541 | G0:0044446 | <1e-4 | ssr8013 | G0:0044237 | 0.0242 |
| s110062 | G0:0055082 | <1e-4 | s111583 | G0:0006631 | <1e-4 | slr0373  | G0:0003674 | <1e-4 | s117047 | G0:0044464 | <1e-4 | slr0109 | G0:0044237 | 0.0242 |
| slr0304 | G0:0005996 | <1e-4 | slr1636 | G0:0016054 | <1e-4 | s115090  | G0:0022838 | <1e-4 | slr1023 | G0:0044425 | <1e-4 | s111036 | G0:0044237 | 0.0242 |
| slr1183 | G0:0051716 | <1e-4 | s111285 | G0:0019362 | <1e-4 | s1111737 | G0:0060089 | <1e-4 | s110860 | G0:0005575 | <1e-4 | slr0613 | G0:0044237 | 0.0242 |
| s111132 | G0:0006082 | <1e-4 | s110839 | G0:0050801 | <1e-4 | s111132  | G0:0015399 | <1e-4 | slr1726 | G0:0044422 | <1e-4 | slr0813 | G0:0044237 | 0.0242 |
| ss10467 | G0:0009144 | <1e-4 | s110688 | G0:0009057 | <1e-4 | s111109  | G0:0016817 | <1e-4 | slr7010 | G0:0044425 | <1e-4 | slr1114 | G0:0044237 | 0.0242 |
| s111583 | G0:0006720 | <1e-4 | slr0380 | G0:0044283 | <1e-4 | s111072  | G0:0016818 | <1e-4 | s110361 | G0:0043226 | <1e-4 | slr5112 | G0:0044237 | 0.0242 |
| ssr3341 | G0:0009991 | <1e-4 | slr0594 | G0:0042180 | <1e-4 | ss13379  | G0:0022857 | <1e-4 | slr1385 | G0:0005575 | <1e-4 | s116052 | G0:0044237 | 0.0242 |
| slr1926 | G0:0048522 | <1e-4 | slr0587 | G0:0019752 | <1e-4 | s111956  | G0:0022838 | <1e-4 | s110630 | G0:0044444 | <1e-4 | s110442 | G0:0044237 | 0.0242 |
| ssr2755 | G0:0080090 | <1e-4 | slr0607 | G0:0006066 | <1e-4 | slr0521  | G0:0022838 | <1e-4 | ssr1391 | G0:0044422 | <1e-4 | slr1577 | G0:0044237 | 0.0242 |
| s110867 | G0:0044283 | <1e-4 | s110068 | G0:0065007 | <1e-4 | s110547  | G0:0022832 | <1e-4 | s111446 | G0:0043226 | <1e-4 | s111191 | G0:0044237 | 0.0242 |
| slr1865 | G0:0046164 | <1e-4 | slr6101 | G0:0046394 | <1e-4 | s110822  | G0:0022857 | <1e-4 | s110230 | G0:0044444 | <1e-4 | slr6106 | G0:0044237 | 0.0242 |

|          |            |       |         |            |       |         |            |       |         |            |       |         |            |        |
|----------|------------|-------|---------|------------|-------|---------|------------|-------|---------|------------|-------|---------|------------|--------|
| ssl2717  | G0:0044260 | <1e-4 | slr6094 | G0:0051716 | <1e-4 | sl17064 | G0:0016462 | <1e-4 | sl10602 | G0:0044425 | <1e-4 | sl11785 | G0:0044237 | 0.0242 |
| slr1563  | G0:0043436 | <1e-4 | sl11583 | G0:0033013 | <1e-4 | sl10810 | G0:0022832 | <1e-4 | slr0400 | G0:0044464 | <1e-4 | sl10552 | G0:0044237 | 0.0242 |
| slr1438  | G0:0005996 | <1e-4 | sl17065 | G0:0009150 | <1e-4 | sl11640 | G0:0008171 | <1e-4 | slr0359 | G0:0044424 | <1e-4 | sl11532 | G0:0044237 | 0.0242 |
| sl11510  | G0:0006082 | <1e-4 | sl10319 | G0:0009987 | <1e-4 | slr6081 | G0:0022890 | <1e-4 | sl11232 | G0:0043226 | <1e-4 | slr6016 | G0:0044237 | 0.0242 |
| ssr6020  | G0:0043933 | <1e-4 | sl10513 | G0:0009144 | <1e-4 | slr1537 | G0:0005342 | <1e-4 | slr0110 | G0:0044444 | <1e-4 | slr0667 | G0:0044237 | 0.0242 |
| slr0554  | G0:0090304 | <1e-4 | slr2125 | G0:0043436 | <1e-4 | sl10669 | G0:0022857 | <1e-4 | ssl7042 | G0:0005575 | <1e-4 | slr0914 | G0:0044237 | 0.0242 |
| sl10423  | G0:0006732 | <1e-4 | ssl7048 | G0:0048519 | <1e-4 | slr0586 | G0:0022836 | <1e-4 | sl10243 | G0:0044424 | <1e-4 | ssl7022 | G0:0044237 | 0.0242 |
| slr0241  | G0:0048522 | <1e-4 | slr1033 | G0:0006733 | <1e-4 | slr0810 | G0:0022803 | <1e-4 | sl10355 | G0:0044424 | <1e-4 | ssr5106 | G0:0044237 | 0.0242 |
| sl11396  | G0:0009987 | <1e-4 | slr2070 | G0:0044271 | <1e-4 | slr6074 | G0:0015405 | <1e-4 | sl11853 | G0:0005575 | <1e-4 | sl10157 | G0:0044237 | 0.0242 |
| sl10263  | G0:0045184 | <1e-4 | sl10355 | G0:0009199 | <1e-4 | ssl7022 | G0:0015405 | <1e-4 | slr7080 | G0:0005575 | <1e-4 | ssr2318 | G0:0044237 | 0.0242 |
| sl11902  | G0:0046907 | <1e-4 | ssl5015 | G0:0016053 | <1e-4 | ssl6035 | G0:0022838 | <1e-4 | slr1566 | G0:0043226 | <1e-4 | sl10031 | G0:0044237 | 0.0242 |
| slr0104  | G0:0034641 | <1e-4 | slr1276 | G0:0006163 | <1e-4 | slr0232 | G0:0016462 | <1e-4 | ssl1045 | G0:0043226 | <1e-4 | sl17030 | G0:0044237 | 0.0242 |
| ssl10109 | G0:0034654 | <1e-4 | sl10327 | G0:0051186 | <1e-4 | sl10886 | G0:0022832 | <1e-4 | sl10641 | G0:0044424 | <1e-4 | slr0285 | G0:0044237 | 0.0242 |
| sl10985  | G0:0019222 | <1e-4 | sl11373 | G0:0016053 | <1e-4 | slr0151 | G0:0016741 | <1e-4 | slr0888 | G0:0044422 | <1e-4 | slr0509 | G0:0044237 | 0.0242 |
| sl10735  | G0:0009889 | <1e-4 | sl10508 | G0:0034641 | <1e-4 | sl10376 | G0:0015291 | <1e-4 | slr6072 | G0:0044424 | <1e-4 | slr0238 | G0:0044237 | 0.0242 |
| ssl6061  | G0:0009059 | <1e-4 | slr1657 | G0:0009893 | <1e-4 | sl10294 | G0:0022836 | <1e-4 | slr0304 | G0:0044446 | <1e-4 | slr1173 | G0:0044237 | 0.0242 |
| slr1568  | G0:0010468 | <1e-4 | ssr7079 | G0:0016054 | <1e-4 | slr0863 | G0:0016741 | <1e-4 | sl10761 | G0:0044464 | <1e-4 | slr1681 | G0:0044237 | 0.0242 |
| sl11151  | G0:0071496 | <1e-4 | slr6100 | G0:0009263 | <1e-4 | sl11583 | G0:0060089 | <1e-4 | sl11381 | G0:0044422 | <1e-4 | sl11784 | G0:0044237 | 0.0242 |
| ssr7072  | G0:0050794 | <1e-4 | slr0514 | G0:0044003 | <1e-4 | slr1773 | G0:0022838 | <1e-4 | slr1056 | G0:0044425 | <1e-4 | ssl2971 | G0:0044237 | 0.0242 |
| slr1813  | G0:0009259 | <1e-4 | slr1187 | G0:0009263 | <1e-4 | slr0751 | G0:0022838 | <1e-4 | slr0971 | G0:0005575 | <1e-4 | sl10565 | G0:0044237 | 0.0242 |
| sl11766  | G0:0009144 | <1e-4 | slr1218 | G0:0019637 | <1e-4 | slr7014 | G0:0043167 | <1e-4 | sl11036 | G0:0044425 | <1e-4 | slr1431 | G0:0003723 | 0.0241 |
| slr1437  | G0:0051716 | <1e-4 | ssl3379 | G0:0019637 | <1e-4 | sl11654 | G0:0015267 | <1e-4 | slr1636 | G0:0044422 | <1e-4 | slr1644 | G0:0003723 | 0.0241 |
| slr6071  | G0:0044003 | <1e-4 | sl10980 | G0:0080090 | <1e-4 | slr2144 | G0:0016818 | <1e-4 | ssl5064 | G0:0044425 | <1e-4 | slr1173 | G0:0005515 | 0.024  |
| slr2125  | G0:0072527 | <1e-4 | slr1923 | G0:0008150 | <1e-4 | slr1568 | G0:0022892 | <1e-4 | slr6103 | G0:0044464 | <1e-4 | slr1752 | G0:0005515 | 0.024  |
| ssr7093  | G0:0046907 | <1e-4 | sl10553 | G0:0009165 | <1e-4 | ssr2422 | G0:0022857 | <1e-4 | sl11693 | G0:0044424 | <1e-4 | sl11388 | G0:0005515 | 0.024  |
| slr1807  | G0:0044260 | <1e-4 | slr0049 | G0:0009987 | <1e-4 | ssl2138 | G0:0043167 | <1e-4 | sl11934 | G0:0044424 | <1e-4 | slr1114 | G0:0005515 | 0.024  |
| ssr6020  | G0:0046128 | <1e-4 | sl11389 | G0:0046907 | <1e-4 | slr0801 | G0:0015291 | <1e-4 | slr0812 | G0:0005575 | <1e-4 | ssr6027 | G0:0005515 | 0.024  |
| sl11106  | G0:0043648 | <1e-4 | sl10688 | G0:0046907 | <1e-4 | slr0596 | G0:0015399 | <1e-4 | sl11680 | G0:0044422 | <1e-4 | slr0453 | G0:0005515 | 0.024  |
| sl11411  | G0:0051716 | <1e-4 | slr1177 | G0:0006066 | <1e-4 | slr1101 | G0:0022890 | <1e-4 | slr5021 | G0:0005575 | <1e-4 | ssr1425 | G0:0005515 | 0.024  |
| slr1441  | G0:0031640 | <1e-4 | sl10024 | G0:0019219 | <1e-4 | sl11063 | G0:0043167 | <1e-4 | sl10314 | G0:0043226 | <1e-4 | slr1875 | G0:0005515 | 0.024  |
| slr7010  | G0:0048523 | <1e-4 | slr7083 | G0:0050801 | <1e-4 | slr2005 | G0:0022891 | <1e-4 | slr7094 | G0:0044464 | <1e-4 | slr0948 | G0:0005515 | 0.024  |
| slr1260  | G0:0009889 | <1e-4 | slr1644 | G0:0018130 | <1e-4 | slr1087 | G0:0003674 | <1e-4 | sl10280 | G0:0005575 | <1e-4 | sl15003 | G0:0005515 | 0.024  |
| sl15097  | G0:0006066 | <1e-4 | sl10639 | G0:0005996 | <1e-4 | slr0337 | G0:0015075 | <1e-4 | sl11654 | G0:0044446 | <1e-4 | ssr1155 | G0:0005515 | 0.024  |
| slr1258  | G0:0046394 | <1e-4 | slr0545 | G0:0044275 | <1e-4 | slr0313 | G0:0060089 | <1e-4 | slr7014 | G0:0005575 | <1e-4 | sl11319 | G0:0005515 | 0.024  |
| slr1407  | G0:0009893 | <1e-4 | slr1087 | G0:0009892 | <1e-4 | sl11681 | G0:0022891 | <1e-4 | sl10449 | G0:0005575 | <1e-4 | ssl7042 | G0:0005515 | 0.024  |
| slr0813  | G0:0048878 | <1e-4 | sl10174 | G0:0006631 | <1e-4 | slr1537 | G0:0022890 | <1e-4 | sl11608 | G0:0044446 | <1e-4 | sl11486 | G0:0005515 | 0.024  |
| slr0569  | G0:0050896 | <1e-4 | sl11062 | G0:0009308 | <1e-4 | sl10861 | G0:0022832 | <1e-4 | ssl0750 | G0:0044446 | <1e-4 | sl11068 | G0:0005515 | 0.024  |
| slr0971  | G0:0009117 | <1e-4 | slr1173 | G0:0019222 | <1e-4 | ssl3379 | G0:0022838 | <1e-4 | slr1811 | G0:0044464 | <1e-4 | slr5073 | G0:0005515 | 0.024  |
| slr1260  | G0:0009126 | <1e-4 | slr1315 | G0:0051716 | <1e-4 | sl15097 | G0:0060089 | <1e-4 | slr5077 | G0:0044422 | <1e-4 | sl17028 | G0:0005515 | 0.024  |
| sl11388  | G0:0008610 | <1e-4 | ssr0335 | G0:0051179 | <1e-4 | slr0588 | G0:0022890 | <1e-4 | ssr5106 | G0:0044425 | <1e-4 | ssl6035 | G0:0005515 | 0.024  |
| ssl0461  | G0:0051716 | <1e-4 | slr0586 | G0:0019219 | <1e-4 | slr5118 | G0:0015293 | <1e-4 | sl10742 | G0:0043226 | <1e-4 | ssr5011 | G0:0005515 | 0.024  |
| sl10625  | G0:0052188 | <1e-4 | sl11348 | G0:0042455 | <1e-4 | slr1611 | G0:0015399 | <1e-4 | slr1107 | G0:0044425 | <1e-4 | slr0416 | G0:0005515 | 0.024  |
| slr0455  | G0:0051171 | <1e-4 | ssl5091 | G0:0006793 | <1e-4 | ssl8028 | G0:0015293 | <1e-4 | slr0654 | G0:0044424 | <1e-4 | slr1142 | G0:0005515 | 0.024  |
| slr1886  | G0:0046164 | <1e-4 | slr0423 | G0:0046128 | <1e-4 | slr6065 | G0:0015291 | <1e-4 | slr0104 | G0:0044464 | <1e-4 | slr1474 | G0:0005515 | 0.024  |
| sl11151  | G0:0006793 | <1e-4 | sl12006 | G0:0042180 | <1e-4 | slr1431 | G0:0022891 | <1e-4 | slr5053 | G0:0044424 | <1e-4 | sl10565 | G0:0005515 | 0.024  |
| ssl1690  | G0:0072524 | <1e-4 | slr0709 | G0:0044271 | <1e-4 | sl10060 | G0:0003674 | <1e-4 | sl10532 | G0:0043226 | <1e-4 | slr1935 | G0:0005515 | 0.024  |
| slr0300  | G0:0009150 | <1e-4 | slr0909 | G0:0006811 | <1e-4 | slr6072 | G0:0022857 | <1e-4 | sl11785 | G0:0005575 | <1e-4 | slr1628 | G0:0005515 | 0.024  |
| slr2103  | G0:0043933 | <1e-4 | ssl0353 | G0:0010556 | <1e-4 | slr0712 | G0:0015077 | <1e-4 | sl11961 | G0:0044422 | <1e-4 | slr2060 | G0:0005515 | 0.024  |
| slr1162  | G0:0006066 | <1e-4 | slr6101 | G0:0009161 | <1e-4 | sl11251 | G0:0015077 | <1e-4 | sl11380 | G0:0043226 | <1e-4 | slr1513 | G0:0005515 | 0.024  |
| sl17086  | G0:0022607 | <1e-4 | sl11348 | G0:0051246 | <1e-4 | slr0334 | G0:0015291 | <1e-4 | slr0456 | G0:0043226 | <1e-4 | ssl2384 | G0:0005515 | 0.024  |
| slr5016  | G0:0009144 | <1e-4 | slr0238 | G0:0042180 | <1e-4 | slr0408 | G0:0042623 | <1e-4 | slr0053 | G0:0044446 | <1e-4 | slr0270 | G0:0005515 | 0.024  |
| sl11691  | G0:0051716 | <1e-4 | ssr6083 | G0:0048518 | <1e-4 | ssr6003 | G0:0022890 | <1e-4 | slr7013 | G0:0044424 | <1e-4 | slr0656 | G0:0005515 | 0.024  |
| slr1814  | G0:0019751 | <1e-4 | slr6091 | G0:0042180 | <1e-4 | slr5112 | G0:0042623 | <1e-4 | sl11730 | G0:0044422 | <1e-4 | slr1790 | G0:0005515 | 0.024  |
| ssr1768  | G0:0043436 | <1e-4 | ssr2802 | G0:0044283 | <1e-4 | slr0699 | G0:0015267 | <1e-4 | slr5102 | G0:0005575 | <1e-4 | ssr7079 | G0:0005515 | 0.024  |

|         |            |       |          |            |       |         |            |       |         |            |       |         |            |       |
|---------|------------|-------|----------|------------|-------|---------|------------|-------|---------|------------|-------|---------|------------|-------|
| slr1998 | G0:0042180 | <1e-4 | s111424  | G0:0080090 | <1e-4 | slr1507 | G0:0015405 | <1e-4 | slr1819 | G0:0044422 | <1e-4 | slr1704 | G0:0005515 | 0.024 |
| slr1206 | G0:0051716 | <1e-4 | slr6101  | G0:0006631 | <1e-4 | slr1103 | G0:0042623 | <1e-4 | s110441 | G0:0044422 | <1e-4 | slr6091 | G0:0005515 | 0.024 |
| s117089 | G0:0019752 | <1e-4 | slr6068  | G0:0009150 | <1e-4 | s110177 | G0:0016817 | <1e-4 | ss15065 | G0:0044425 | <1e-4 | ssr6030 | G0:0005515 | 0.024 |
| ss12064 | G0:0051171 | <1e-4 | s111769  | G0:0010556 | <1e-4 | slr1162 | G0:0016818 | <1e-4 | slr1178 | G0:0044444 | <1e-4 | ssr3129 | G0:0005515 | 0.024 |
| s110297 | G0:0045184 | <1e-4 | s111530  | G0:0071496 | <1e-4 | slr0869 | G0:0022836 | <1e-4 | slr0609 | G0:0005575 | <1e-4 | slr8044 | G0:0005515 | 0.024 |
| s110505 | G0:0009394 | <1e-4 | slr0569  | G0:0009309 | <1e-4 | s111934 | G0:0022892 | <1e-4 | ss11464 | G0:0044425 | <1e-4 | s111609 | G0:0005515 | 0.024 |
| slr0249 | G0:0046128 | <1e-4 | slr1668  | G0:0055086 | <1e-4 | ssr6020 | G0:0003674 | <1e-4 | slr1179 | G0:0005575 | <1e-4 | ss12162 | G0:0005515 | 0.024 |
| slr0397 | G0:0009059 | <1e-4 | slr7057  | G0:0010468 | <1e-4 | slr7060 | G0:0022892 | <1e-4 | ss15064 | G0:0005575 | <1e-4 | slr0516 | G0:0005515 | 0.024 |
| ssr2754 | G0:0009309 | <1e-4 | slr0483  | G0:0022411 | <1e-4 | slr1819 | G0:0015267 | <1e-4 | slr1648 | G0:0043226 | <1e-4 | s111049 | G0:0005515 | 0.024 |
| s111052 | G0:0048878 | <1e-4 | slr0318  | G0:0006732 | <1e-4 | slr0596 | G0:0016818 | <1e-4 | s111040 | G0:0044444 | <1e-4 | s110496 | G0:0005515 | 0.024 |
| slr0263 | G0:0071840 | <1e-4 | s1110756 | G0:0050896 | <1e-4 | ssr6078 | G0:0008171 | <1e-4 | s110156 | G0:0044422 | <1e-4 | ss15103 | G0:0005515 | 0.024 |
| s111654 | G0:0009144 | <1e-4 | s111609  | G0:0009260 | <1e-4 | slr1258 | G0:0015399 | <1e-4 | s110266 | G0:0005575 | <1e-4 | s111464 | G0:0005515 | 0.024 |
| s111766 | G0:0019222 | <1e-4 | s110980  | G0:0009059 | <1e-4 | slr1827 | G0:0022838 | <1e-4 | slr1032 | G0:0044422 | <1e-4 | ss13829 | G0:0005515 | 0.024 |
| slr1619 | G0:0042180 | <1e-4 | slr0408  | G0:0008610 | <1e-4 | slr0712 | G0:0022836 | <1e-4 | slr5119 | G0:0044444 | <1e-4 | ss16092 | G0:0005515 | 0.024 |
| ssr1473 | G0:0009893 | <1e-4 | ssr1528  | G0:0009893 | <1e-4 | ssr0692 | G0:0015077 | <1e-4 | slr7099 | G0:0043226 | <1e-4 | s111151 | G0:0005515 | 0.024 |
| slr0287 | G0:0051179 | <1e-4 | slr1537  | G0:0048519 | <1e-4 | slr1690 | G0:0005342 | <1e-4 | s117043 | G0:0044446 | <1e-4 | slr6068 | G0:0005515 | 0.024 |
| s110761 | G0:0019752 | <1e-4 | s111761  | G0:0080090 | <1e-4 | s110572 | G0:0043492 | <1e-4 | slr7092 | G0:0044422 | <1e-4 | slr0637 | G0:0005515 | 0.024 |
| slr7060 | G0:0019637 | <1e-4 | slr0082  | G0:0009141 | <1e-4 | ssr3402 | G0:0022803 | <1e-4 | slr1391 | G0:0044446 | <1e-4 | slr0300 | G0:0005515 | 0.024 |
| slr5018 | G0:0043170 | <1e-4 | s111954  | G0:0044255 | <1e-4 | s110815 | G0:0015077 | <1e-4 | s117031 | G0:0044422 | <1e-4 | s116055 | G0:0005515 | 0.024 |
| slr1951 | G0:0046907 | <1e-4 | slr1900  | G0:0019752 | <1e-4 | s111350 | G0:0016741 | <1e-4 | ss11577 | G0:0044444 | <1e-4 | slr2110 | G0:0005515 | 0.024 |
| s111158 | G0:0006753 | <1e-4 | s110023  | G0:0008150 | <1e-4 | ssr1768 | G0:0022838 | <1e-4 | slr0930 | G0:0044464 | <1e-4 | ss10350 | G0:0005515 | 0.024 |
| ssr2781 | G0:0046128 | <1e-4 | slr0645  | G0:0090304 | <1e-4 | s110167 | G0:0015267 | <1e-4 | ssr1041 | G0:0043226 | <1e-4 | slr1886 | G0:0005515 | 0.024 |
| s116053 | G0:0006091 | <1e-4 | s111995  | G0:0050801 | <1e-4 | slr1737 | G0:0016817 | <1e-4 | ssr2962 | G0:0044422 | <1e-4 | slr1819 | G0:0005515 | 0.024 |
| slr0978 | G0:0043549 | <1e-4 | s111250  | G0:0006163 | <1e-4 | s110405 | G0:0015291 | <1e-4 | s111853 | G0:0044446 | <1e-4 | slr2103 | G0:0005515 | 0.024 |
| slr0491 | G0:0072521 | <1e-4 | ss10353  | G0:0072527 | <1e-4 | s111022 | G0:0022890 | <1e-4 | slr6021 | G0:0044422 | <1e-4 | s111024 | G0:0005515 | 0.024 |
| s111233 | G0:0034660 | <1e-4 | s110286  | G0:0048523 | <1e-4 | slr0285 | G0:0015075 | <1e-4 | s111049 | G0:0005575 | <1e-4 | slr5087 | G0:0005515 | 0.024 |
| ssr1528 | G0:0005996 | <1e-4 | slr6004  | G0:0051179 | <1e-4 | s110296 | G0:0022838 | <1e-4 | slr2115 | G0:0005575 | <1e-4 | s111979 | G0:0005515 | 0.024 |
| ssr2803 | G0:0072521 | <1e-4 | s111024  | G0:0019752 | <1e-4 | s118001 | G0:0005342 | <1e-4 | s111240 | G0:0044464 | <1e-4 | slr2049 | G0:0005515 | 0.024 |
| ssr7017 | G0:0009987 | <1e-4 | slr0376  | G0:0042455 | <1e-4 | s110063 | G0:0016462 | <1e-4 | slr1886 | G0:0044444 | <1e-4 | ss12064 | G0:0005515 | 0.024 |
| slr0496 | G0:0009056 | <1e-4 | slr1222  | G0:0009161 | <1e-4 | slr2025 | G0:0016817 | <1e-4 | slr1437 | G0:0044425 | <1e-4 | ss11300 | G0:0005515 | 0.024 |
| slr1273 | G0:0046128 | <1e-4 | s117050  | G0:0043933 | <1e-4 | s110102 | G0:0043492 | <1e-4 | s110310 | G0:0005575 | <1e-4 | slr1780 | G0:0005515 | 0.024 |
| ss13451 | G0:0090304 | <1e-4 | s111586  | G0:0051234 | <1e-4 | slr1384 | G0:0022857 | <1e-4 | ss12065 | G0:0043226 | <1e-4 | ssr0109 | G0:0005515 | 0.024 |
| ssr2803 | G0:0009117 | <1e-4 | slr7060  | G0:0071554 | <1e-4 | slr0962 | G0:0015293 | <1e-4 | slr1674 | G0:0043226 | <1e-4 | s117069 | G0:0005515 | 0.024 |
| slr1353 | G0:0044260 | <1e-4 | s111608  | G0:0042180 | <1e-4 | s111640 | G0:0022836 | <1e-4 | slr0480 | G0:0043226 | <1e-4 | ss15008 | G0:0005515 | 0.024 |
| ssr6062 | G0:0043436 | <1e-4 | slr0408  | G0:0008150 | <1e-4 | s110981 | G0:0015075 | <1e-4 | slr5126 | G0:0044422 | <1e-4 | slr1915 | G0:0005515 | 0.024 |
| slr6005 | G0:0034660 | <1e-4 | s110414  | G0:0050794 | <1e-4 | slr5101 | G0:0008171 | <1e-4 | s110062 | G0:0044464 | <1e-4 | s111640 | G0:0005515 | 0.024 |
| s110888 | G0:0006576 | <1e-4 | s110242  | G0:0071842 | <1e-4 | slr0386 | G0:0016746 | <1e-4 | slr0601 | G0:0044422 | <1e-4 | slr1507 | G0:0005515 | 0.024 |
| slr6087 | G0:0048878 | <1e-4 | slr1025  | G0:0051234 | <1e-4 | s111658 | G0:0015291 | <1e-4 | s115033 | G0:0005575 | <1e-4 | ss17022 | G0:0005515 | 0.024 |
| ss13549 | G0:0006631 | <1e-4 | slr7092  | G0:0022607 | <1e-4 | ss10467 | G0:0015075 | <1e-4 | ssr1256 | G0:0044425 | <1e-4 | s111714 | G0:0005515 | 0.024 |
| s110762 | G0:0031323 | <1e-4 | s110780  | G0:0019751 | <1e-4 | slr2003 | G0:0022836 | <1e-4 | slr0878 | G0:0043226 | <1e-4 | s110230 | G0:0005515 | 0.024 |
| ssr2439 | G0:0009150 | <1e-4 | s110031  | G0:0031640 | <1e-4 | slr1895 | G0:0008171 | <1e-4 | ssr6020 | G0:0044446 | <1e-4 | slr1206 | G0:0005515 | 0.024 |
| slr1513 | G0:0044260 | <1e-4 | slr5016  | G0:0009057 | <1e-4 | ssr6083 | G0:0043492 | <1e-4 | s110225 | G0:0005575 | <1e-4 | slr0238 | G0:0005515 | 0.024 |
| slr1812 | G0:0065007 | <1e-4 | s110736  | G0:0043170 | <1e-4 | s117067 | G0:0015405 | <1e-4 | slr1074 | G0:0005575 | <1e-4 | slr0588 | G0:0005515 | 0.024 |
| slr6064 | G0:0046164 | <1e-4 | slr0971  | G0:0050896 | <1e-4 | s110930 | G0:0015405 | <1e-4 | s110658 | G0:0043226 | <1e-4 | ss15091 | G0:0005515 | 0.024 |
| slr2118 | G0:0071554 | <1e-4 | slr0596  | G0:0009144 | <1e-4 | s111858 | G0:0043492 | <1e-4 | slr1571 | G0:0044446 | <1e-4 | s111192 | G0:0005515 | 0.024 |
| s110905 | G0:0046483 | <1e-4 | s110860  | G0:0044003 | <1e-4 | ss17021 | G0:0015075 | <1e-4 | slr0569 | G0:0044464 | <1e-4 | slr0613 | G0:0005515 | 0.024 |
| slr0869 | G0:0009308 | <1e-4 | s111252  | G0:0051818 | <1e-4 | s111319 | G0:0015405 | <1e-4 | s110779 | G0:0044424 | <1e-4 | s110608 | G0:0005515 | 0.024 |
| slr1222 | G0:0010468 | <1e-4 | slr1396  | G0:0044248 | <1e-4 | slr1464 | G0:0015399 | <1e-4 | ss12595 | G0:0044464 | <1e-4 | slr1170 | G0:0005515 | 0.024 |
| s111965 | G0:0009165 | <1e-4 | slr1737  | G0:0016053 | <1e-4 | s111652 | G0:0016746 | <1e-4 | ssr5121 | G0:0005575 | <1e-4 | slr8021 | G0:0005515 | 0.024 |
| slr1170 | G0:0072527 | <1e-4 | slr1474  | G0:0090304 | <1e-4 | ssr2553 | G0:0005342 | <1e-4 | s110499 | G0:0044464 | <1e-4 | slr1174 | G0:0005515 | 0.024 |
| s110103 | G0:0006082 | <1e-4 | s110505  | G0:0006733 | <1e-4 | s110327 | G0:0008171 | <1e-4 | s111541 | G0:0044444 | <1e-4 | slr0459 | G0:0005515 | 0.024 |
| slr1462 | G0:0090304 | <1e-4 | s110984  | G0:0019752 | <1e-4 | s110762 | G0:0022832 | <1e-4 | s111906 | G0:0043226 | <1e-4 | s117090 | G0:0005515 | 0.024 |
| ss12420 | G0:0001932 | <1e-4 | slr1169  | G0:0006082 | <1e-4 | s111526 | G0:0016746 | <1e-4 | s110410 | G0:0044464 | <1e-4 | slr5013 | G0:0005515 | 0.024 |
| slr0765 | G0:0009126 | <1e-4 | s110558  | G0:0044282 | <1e-4 | slr1104 | G0:0015267 | <1e-4 | s117065 | G0:0044425 | <1e-4 | s111531 | G0:0005515 | 0.024 |

|         |            |       |         |            |       |         |            |       |         |            |       |         |            |        |
|---------|------------|-------|---------|------------|-------|---------|------------|-------|---------|------------|-------|---------|------------|--------|
| s117090 | G0:0006066 | <1e-4 | s111562 | G0:0055114 | <1e-4 | s111702 | G0:0015075 | <1e-4 | s117028 | G0:0044444 | <1e-4 | s110479 | G0:0005515 | 0.024  |
| ss10352 | G0:0006732 | <1e-4 | s1r8044 | G0:0048878 | <1e-4 | s1r0699 | G0:0008171 | <1e-4 | s110394 | G0:0044444 | <1e-4 | s110939 | G0:0005515 | 0.024  |
| ss13829 | G0:0071554 | <1e-4 | s110102 | G0:0046164 | <1e-4 | s110360 | G0:0022857 | <1e-4 | s110188 | G0:0043226 | <1e-4 | s1r0730 | G0:0005515 | 0.024  |
| s1r0408 | G0:0051186 | <1e-4 | s1r6016 | G0:0006066 | <1e-4 | s1r2032 | G0:0016817 | <1e-4 | s1r1623 | G0:0044422 | <1e-4 | ss18028 | G0:0005515 | 0.024  |
| s111272 | G0:0050896 | <1e-4 | s1r6015 | G0:0044260 | <1e-4 | s118001 | G0:0015293 | <1e-4 | s1r0634 | G0:0044425 | <1e-4 | s110905 | G0:0005515 | 0.024  |
| ssr8013 | G0:0050794 | <1e-4 | s110249 | G0:0009059 | <1e-4 | s111652 | G0:0022803 | <1e-4 | s111911 | G0:0044422 | <1e-4 | s1r7100 | G0:0005515 | 0.024  |
| s110243 | G0:0009987 | <1e-4 | ssr1552 | G0:0031323 | <1e-4 | s1r0326 | G0:0015405 | <1e-4 | s1r6101 | G0:0044425 | <1e-4 | s1r0325 | G0:0005515 | 0.024  |
| s1r1886 | G0:0006576 | <1e-4 | s1r1168 | G0:0051234 | <1e-4 | s1r0023 | G0:0008171 | <1e-4 | s1r1429 | G0:0044464 | <1e-4 | ssr0761 | G0:0005515 | 0.024  |
| s110775 | G0:0009132 | <1e-4 | ssr3571 | G0:0006721 | <1e-4 | s118032 | G0:0005342 | <1e-4 | s111344 | G0:0005575 | <1e-4 | s111373 | G0:0005515 | 0.024  |
| s1r1073 | G0:0009142 | <1e-4 | s1r0989 | G0:0042451 | <1e-4 | s1r6101 | G0:0043167 | <1e-4 | s111121 | G0:0005575 | <1e-4 | s117006 | G0:0005515 | 0.024  |
| s1r0941 | G0:0009165 | <1e-4 | s1r1241 | G0:0019752 | <1e-4 | s110984 | G0:0015267 | <1e-4 | s1r0337 | G0:0044424 | <1e-4 | ss11690 | G0:0005515 | 0.024  |
| s118027 | G0:0071496 | <1e-4 | s1r1230 | G0:0065007 | <1e-4 | s111638 | G0:0016741 | <1e-4 | s111321 | G0:0043226 | <1e-4 | s1r0273 | G0:0005515 | 0.024  |
| ss15064 | G0:0050794 | <1e-4 | s110810 | G0:0044271 | <1e-4 | s111573 | G0:0015075 | <1e-4 | ss16061 | G0:0044446 | <1e-4 | s110098 | G0:0005515 | 0.024  |
| s111722 | G0:0009117 | <1e-4 | s111232 | G0:0033013 | <1e-4 | s110803 | G0:0022857 | <1e-4 | s110996 | G0:0005575 | <1e-4 | s1r1788 | G0:0004518 | 0.0234 |
| s110564 | G0:0009308 | <1e-4 | s1r0730 | G0:0006066 | <1e-4 | ss17048 | G0:0015075 | <1e-4 | s1r6022 | G0:0044425 | <1e-4 | s1r1885 | G0:0004518 | 0.0234 |
| s111573 | G0:0006721 | <1e-4 | s1r1935 | G0:0060255 | <1e-4 | s1r1169 | G0:0022803 | <1e-4 | s1r0479 | G0:0044425 | <1e-4 | s1r1230 | G0:0004518 | 0.0234 |
| s1r1774 | G0:0006082 | <1e-4 | s1r0588 | G0:0042455 | <1e-4 | s118032 | G0:0022891 | <1e-4 | ssr1473 | G0:0005575 | <1e-4 | s111613 | G0:0004518 | 0.0234 |
| s110857 | G0:0009263 | <1e-4 | s111036 | G0:0043648 | <1e-4 | ss11046 | G0:0015267 | <1e-4 | s111938 | G0:0005575 | <1e-4 | s110944 | G0:0004518 | 0.0234 |
| s110423 | G0:0034641 | <1e-4 | s1r7095 | G0:0010556 | <1e-4 | s110822 | G0:0005342 | <1e-4 | ssr2802 | G0:0044424 | <1e-4 | s1r2011 | G0:0004518 | 0.0234 |
| ss17039 | G0:0019222 | <1e-4 | s1r0609 | G0:0019752 | <1e-4 | s1r1315 | G0:0003674 | <1e-4 | s1r0039 | G0:0044464 | <1e-4 | ssr1765 | G0:0004518 | 0.0234 |
| s1r7094 | G0:0006720 | <1e-4 | s111658 | G0:0006753 | <1e-4 | s1r6091 | G0:0022857 | <1e-4 | s110443 | G0:0005575 | <1e-4 | s1r1266 | G0:0004518 | 0.0234 |
| s111606 | G0:0019219 | <1e-4 | s1r1383 | G0:0072521 | <1e-4 | s1r2048 | G0:0015077 | <1e-4 | s110909 | G0:0005575 | <1e-4 | s110243 | G0:0004518 | 0.0234 |
| s110553 | G0:0090304 | <1e-4 | s111086 | G0:0018130 | <1e-4 | ssr3122 | G0:0016741 | <1e-4 | s1r7023 | G0:0044425 | <1e-4 | s110237 | G0:0004518 | 0.0234 |
| s110997 | G0:0006766 | <1e-4 | s1r0655 | G0:0016054 | <1e-4 | ssr3304 | G0:0042623 | <1e-4 | s110926 | G0:0005575 | <1e-4 | ss10352 | G0:0004518 | 0.0234 |
| s1r0610 | G0:0046128 | <1e-4 | s1r1557 | G0:0046394 | <1e-4 | s1r1082 | G0:0022836 | <1e-4 | s1r1098 | G0:0005575 | <1e-4 | s110085 | G0:0004518 | 0.0234 |
| s1r1638 | G0:0044275 | <1e-4 | s1r0801 | G0:0006631 | <1e-4 | s1r1307 | G0:0015399 | <1e-4 | s1r0351 | G0:0044422 | <1e-4 | s111835 | G0:0004518 | 0.0234 |
| s1r0870 | G0:0006163 | <1e-4 | s1r1544 | G0:0050801 | <1e-4 | s110413 | G0:0043167 | <1e-4 | s110298 | G0:0044444 | <1e-4 | s110785 | G0:0004518 | 0.0234 |
| s1r1530 | G0:0048519 | <1e-4 | ss13383 | G0:0009117 | <1e-4 | ss12420 | G0:0016818 | <1e-4 | ss12162 | G0:0044464 | <1e-4 | s1r1964 | G0:0004518 | 0.0234 |
| s1r0108 | G0:0052188 | <1e-4 | s110815 | G0:0072528 | <1e-4 | s1r0728 | G0:0015399 | <1e-4 | s1r1854 | G0:0044464 | <1e-4 | ssr2615 | G0:0004518 | 0.0234 |
| s111880 | G0:0019752 | <1e-4 | s1r7026 | G0:0009057 | <1e-4 | s1r1917 | G0:0022857 | <1e-4 | s110376 | G0:0043226 | <1e-4 | s1r0723 | G0:0004518 | 0.0234 |
| s111009 | G0:0044275 | <1e-4 | s111380 | G0:0006631 | <1e-4 | s1r0876 | G0:0016746 | <1e-4 | s1r0962 | G0:0005575 | <1e-4 | s1r0941 | G0:0004518 | 0.0234 |
| s1r0645 | G0:0048878 | <1e-4 | s111464 | G0:0043412 | <1e-4 | s1r0157 | G0:0042623 | <1e-4 | s1r1667 | G0:0005575 | <1e-4 | s111656 | G0:0004518 | 0.0234 |
| ss11520 | G0:0008150 | <1e-4 | s1r1071 | G0:0009987 | <1e-4 | s1r5112 | G0:0022838 | <1e-4 | s111071 | G0:0044425 | <1e-4 | s111262 | G0:0004518 | 0.0234 |
| ss15129 | G0:0050789 | <1e-4 | s115128 | G0:0043412 | <1e-4 | s1r1852 | G0:0015399 | <1e-4 | s1r1259 | G0:0044464 | <1e-4 | s1r0386 | G0:0004518 | 0.0234 |
| s111938 | G0:0046164 | <1e-4 | s1r1535 | G0:0044271 | <1e-4 | ss15095 | G0:0022892 | <1e-4 | s1r0456 | G0:0044424 | <1e-4 | s111949 | G0:0004518 | 0.0234 |
| s110590 | G0:0006793 | <1e-4 | ssr2317 | G0:0022411 | <1e-4 | s1r1287 | G0:0016741 | <1e-4 | s111495 | G0:0044444 | <1e-4 | s110497 | G0:0004518 | 0.0234 |
| ss15008 | G0:0050896 | <1e-4 | ssr6019 | G0:0010468 | <1e-4 | s111072 | G0:0022803 | <1e-4 | ssr6020 | G0:0043226 | <1e-4 | s111315 | G0:0004518 | 0.0234 |
| s110325 | G0:0006721 | <1e-4 | s1r0291 | G0:0046907 | <1e-4 | s1r0921 | G0:0022891 | <1e-4 | s1r0769 | G0:0005575 | <1e-4 | s1r0006 | G0:0004518 | 0.0234 |
| s110008 | G0:0009150 | <1e-4 | s1r0249 | G0:0019222 | <1e-4 | s1r0491 | G0:0022857 | <1e-4 | s111121 | G0:0044464 | <1e-4 | s1r1210 | G0:0004518 | 0.0234 |
| s1r0207 | G0:0009141 | <1e-4 | s1r2144 | G0:0006631 | <1e-4 | s1r5118 | G0:0022891 | <1e-4 | s111488 | G0:0044446 | <1e-4 | s110007 | G0:0004518 | 0.0234 |
| s111960 | G0:0006066 | <1e-4 | s1r1917 | G0:0009892 | <1e-4 | s115132 | G0:0015293 | <1e-4 | s1r1513 | G0:0043226 | <1e-4 | s111006 | G0:0004518 | 0.0234 |
| s116053 | G0:0050896 | <1e-4 | s1r2120 | G0:0034641 | <1e-4 | s1r0489 | G0:0042623 | <1e-4 | s110981 | G0:0005575 | <1e-4 | ssr2962 | G0:0004518 | 0.0234 |
| s1r0964 | G0:0009132 | <1e-4 | s110449 | G0:0042451 | <1e-4 | s111464 | G0:0016817 | <1e-4 | s1r8022 | G0:0044424 | <1e-4 | s111040 | G0:0008233 | 0.0233 |
| s110843 | G0:0006576 | <1e-4 | s1r1753 | G0:0046907 | <1e-4 | s111162 | G0:0015291 | <1e-4 | s110549 | G0:0044444 | <1e-4 | s111225 | G0:0008233 | 0.0233 |
| ss11498 | G0:0055114 | <1e-4 | s110268 | G0:0044106 | <1e-4 | s1r7024 | G0:0015075 | <1e-4 | s118019 | G0:0044424 | <1e-4 | s110297 | G0:0008233 | 0.0233 |
| s110473 | G0:0006220 | <1e-4 | s1r0489 | G0:0019637 | <1e-4 | s111002 | G0:0042623 | <1e-4 | s1r6012 | G0:0044444 | <1e-4 | s1r2115 | G0:0008233 | 0.0233 |
| s1r0723 | G0:0048522 | <1e-4 | s1r0103 | G0:0050794 | <1e-4 | s1r5118 | G0:0022857 | <1e-4 | s110932 | G0:0044464 | <1e-4 | s1r0680 | G0:0008233 | 0.0233 |
| s1r2120 | G0:0022411 | <1e-4 | s1r1616 | G0:0065007 | <1e-4 | s1r0348 | G0:0016741 | <1e-4 | s111414 | G0:0005575 | <1e-4 | s1r1495 | G0:0016772 | 0.0233 |
| s1r0655 | G0:0034641 | <1e-4 | s110414 | G0:0019362 | <1e-4 | s1r0263 | G0:0022838 | <1e-4 | s116054 | G0:0044424 | <1e-4 | ssr2781 | G0:0016772 | 0.0233 |
| ssr3532 | G0:0080090 | <1e-4 | s111009 | G0:0006082 | <1e-4 | s1r0869 | G0:0005342 | <1e-4 | s1r0722 | G0:0043226 | <1e-4 | s1r1033 | G0:0008233 | 0.0233 |
| s110198 | G0:0006576 | <1e-4 | ss13142 | G0:0009889 | <1e-4 | s1r7101 | G0:0008171 | <1e-4 | ssr0332 | G0:0044464 | <1e-4 | s1r1895 | G0:0008233 | 0.0233 |
| s111477 | G0:0019362 | <1e-4 | s110444 | G0:0065007 | <1e-4 | s1r2115 | G0:0022803 | <1e-4 | s110608 | G0:0044422 | <1e-4 | s1r0848 | G0:0016772 | 0.0233 |
| s1r0397 | G0:0044248 | <1e-4 | s110886 | G0:0016054 | <1e-4 | s1r1576 | G0:0016462 | <1e-4 | s110872 | G0:0044422 | <1e-4 | s111424 | G0:0016772 | 0.0233 |
| s1r7100 | G0:0071840 | <1e-4 | s111289 | G0:0009124 | <1e-4 | s1r0848 | G0:0042623 | <1e-4 | s1r0031 | G0:0005575 | <1e-4 | s1r0483 | G0:0008233 | 0.0233 |

|         |            |       |         |            |       |         |            |       |         |            |       |         |            |        |
|---------|------------|-------|---------|------------|-------|---------|------------|-------|---------|------------|-------|---------|------------|--------|
| sl10208 | G0:0034641 | <1e-4 | sl18011 | G0:0048522 | <1e-4 | sl17070 | G0:0015075 | <1e-4 | slr5018 | G0:0005575 | <1e-4 | sl11239 | G0:0008233 | 0.0233 |
| slr1169 | G0:0050801 | <1e-4 | slr1854 | G0:0010556 | <1e-4 | slr6063 | G0:0003674 | <1e-4 | slr0954 | G0:0005575 | <1e-4 | sl10449 | G0:0008233 | 0.0233 |
| slr0771 | G0:0022607 | <1e-4 | slr6008 | G0:0090304 | <1e-4 | slr0769 | G0:0005342 | <1e-4 | slr0948 | G0:0044444 | <1e-4 | sl10595 | G0:0008233 | 0.0233 |
| ss12138 | G0:0051188 | <1e-4 | sl11681 | G0:0006631 | <1e-4 | slr1624 | G0:0043167 | <1e-4 | ssr3571 | G0:0043226 | <1e-4 | sl11352 | G0:0008233 | 0.0233 |
| slr1071 | G0:0055082 | <1e-4 | sl11925 | G0:0050801 | <1e-4 | slr1541 | G0:0016462 | <1e-4 | sl11131 | G0:0044464 | <1e-4 | sl10359 | G0:0008233 | 0.0233 |
| sl10327 | G0:0009991 | <1e-4 | slr0668 | G0:0044275 | <1e-4 | slr1547 | G0:0015077 | <1e-4 | slr0845 | G0:0043226 | <1e-4 | slr0729 | G0:0008233 | 0.0233 |
| slr5087 | G0:0022411 | <1e-4 | slr6100 | G0:0043436 | <1e-4 | slr6104 | G0:0022803 | <1e-4 | slr1681 | G0:0005575 | <1e-4 | sl10787 | G0:0008233 | 0.0233 |
| ss10109 | G0:0009893 | <1e-4 | slr0919 | G0:0031323 | <1e-4 | slr0006 | G0:0022832 | <1e-4 | slr1957 | G0:0044424 | <1e-4 | ssr2201 | G0:0016772 | 0.0233 |
| sl16052 | G0:0010468 | <1e-4 | sl11265 | G0:0044260 | <1e-4 | slr0581 | G0:0016818 | <1e-4 | slr1970 | G0:0044444 | <1e-4 | sl10688 | G0:0008233 | 0.0233 |
| slr1530 | G0:0042180 | <1e-4 | sl10781 | G0:0019222 | <1e-4 | slr1033 | G0:0022890 | <1e-4 | slr2003 | G0:0044444 | <1e-4 | slr1128 | G0:0008233 | 0.0233 |
| slr0407 | G0:0042455 | <1e-4 | slr1236 | G0:0009144 | <1e-4 | sl11634 | G0:0016817 | <1e-4 | sl11021 | G0:0044422 | <1e-4 | ss13291 | G0:0016772 | 0.0233 |
| slr1814 | G0:0044271 | <1e-4 | sl11464 | G0:0006220 | <1e-4 | slr0325 | G0:0022838 | <1e-4 | slr0551 | G0:0044422 | <1e-4 | sl11054 | G0:0008233 | 0.0233 |
| sl10478 | G0:0010468 | <1e-4 | sl11095 | G0:0006721 | <1e-4 | sl10309 | G0:0005342 | <1e-4 | sl10775 | G0:0044444 | <1e-4 | sl10763 | G0:0016772 | 0.0233 |
| ss15095 | G0:0016054 | <1e-4 | slr2003 | G0:0031323 | <1e-4 | slr0689 | G0:0003674 | <1e-4 | slr1276 | G0:0044425 | <1e-4 | sl11119 | G0:0016772 | 0.0233 |
| sl11002 | G0:0010556 | <1e-4 | ss15099 | G0:0006811 | <1e-4 | sg10001 | G0:0003674 | <1e-4 | slr2144 | G0:0044424 | <1e-4 | sl11350 | G0:0008233 | 0.0233 |
| slr1799 | G0:0009057 | <1e-4 | ssr6085 | G0:0048878 | <1e-4 | slr6081 | G0:0015291 | <1e-4 | sl10783 | G0:0044422 | <1e-4 | sl10810 | G0:0008233 | 0.0233 |
| slr0318 | G0:0009987 | <1e-4 | ss12749 | G0:0019222 | <1e-4 | slr0208 | G0:0022832 | <1e-4 | slr1275 | G0:0005575 | <1e-4 | sl11873 | G0:0008233 | 0.0233 |
| slr0651 | G0:0065007 | <1e-4 | slr0818 | G0:0044260 | <1e-4 | sl11571 | G0:0022836 | <1e-4 | slr1315 | G0:0043226 | <1e-4 | sl11152 | G0:0008233 | 0.0233 |
| slr5023 | G0:0043933 | <1e-4 | sl11583 | G0:0071554 | <1e-4 | slr1116 | G0:0015267 | <1e-4 | slr1659 | G0:0005575 | <1e-4 | sl11267 | G0:0008233 | 0.0233 |
| sl10564 | G0:0048519 | <1e-4 | ss12814 | G0:0009893 | <1e-4 | slr1270 | G0:0043167 | <1e-4 | sl10710 | G0:0044425 | <1e-4 | sl11072 | G0:0008233 | 0.0233 |
| slr1235 | G0:0051186 | <1e-4 | slr0610 | G0:0031640 | <1e-4 | sl10023 | G0:0016817 | <1e-4 | sl10327 | G0:0044424 | <1e-4 | sl10888 | G0:0008233 | 0.0233 |
| sg10001 | G0:0044271 | <1e-4 | sl10678 | G0:0050896 | <1e-4 | slr1196 | G0:0042623 | <1e-4 | sl11289 | G0:0044425 | <1e-4 | slr1762 | G0:0008233 | 0.0233 |
| ssr2755 | G0:0044260 | <1e-4 | slr1670 | G0:0044282 | <1e-4 | sl11040 | G0:0022832 | <1e-4 | slr0362 | G0:0044424 | <1e-4 | sl11344 | G0:0008233 | 0.0233 |
| sl11702 | G0:0009308 | <1e-4 | sl11131 | G0:0052188 | <1e-4 | sl11541 | G0:0022890 | <1e-4 | slr0376 | G0:0005575 | <1e-4 | slr1827 | G0:0008233 | 0.0233 |
| sl11660 | G0:0050794 | <1e-4 | slr0192 | G0:0019222 | <1e-4 | slr0634 | G0:0043492 | <1e-4 | ss17038 | G0:0044422 | <1e-4 | sl10156 | G0:0008233 | 0.0233 |
| slr1895 | G0:0065007 | <1e-4 | ss17042 | G0:0009263 | <1e-4 | slr0263 | G0:0016462 | <1e-4 | sl11095 | G0:0044425 | <1e-4 | sl10614 | G0:0008233 | 0.0233 |
| slr0196 | G0:0008610 | <1e-4 | slr1053 | G0:0055086 | <1e-4 | slr0935 | G0:0015291 | <1e-4 | slr1603 | G0:0044446 | <1e-4 | sl10647 | G0:0016772 | 0.0233 |
| ss15098 | G0:0045184 | <1e-4 | slr0053 | G0:0072528 | <1e-4 | sl10736 | G0:0022890 | <1e-4 | ss11690 | G0:0044444 | <1e-4 | slr0789 | G0:0008233 | 0.0233 |
| sl10024 | G0:0005996 | <1e-4 | slr5127 | G0:0050801 | <1e-4 | sl11902 | G0:0008171 | <1e-4 | ssr6099 | G0:0044444 | <1e-4 | slr0654 | G0:0008233 | 0.0233 |
| slr1676 | G0:0048518 | <1e-4 | sl11193 | G0:0006753 | <1e-4 | sl10448 | G0:0015399 | <1e-4 | sl10423 | G0:0005575 | <1e-4 | slr0249 | G0:0008233 | 0.0233 |
| ssr5092 | G0:0048519 | <1e-4 | sl10854 | G0:0060255 | <1e-4 | sl10423 | G0:0022892 | <1e-4 | slr1174 | G0:0044444 | <1e-4 | slr0596 | G0:0008233 | 0.0233 |
| ssr6048 | G0:0019219 | <1e-4 | slr6044 | G0:0048522 | <1e-4 | slr6081 | G0:0022838 | <1e-4 | ss15103 | G0:0044425 | <1e-4 | sl11925 | G0:0008233 | 0.0233 |
| sl10294 | G0:0009991 | <1e-4 | slr0453 | G0:0072521 | <1e-4 | slr7024 | G0:0022832 | <1e-4 | sl11380 | G0:0044424 | <1e-4 | sl11071 | G0:0008233 | 0.0233 |
| ssr1765 | G0:0016054 | <1e-4 | sl10096 | G0:0009144 | <1e-4 | slr1780 | G0:0015405 | <1e-4 | slr0285 | G0:0044425 | <1e-4 | sl10585 | G0:0008233 | 0.0233 |
| sl11359 | G0:0006066 | <1e-4 | slr1911 | G0:0045184 | <1e-4 | sl16054 | G0:0015291 | <1e-4 | sl11736 | G0:0044422 | <1e-4 | slr0815 | G0:0008233 | 0.0233 |
| sl11939 | G0:0006733 | <1e-4 | sl11060 | G0:0060255 | <1e-4 | slr1505 | G0:0016817 | <1e-4 | sl10577 | G0:0044446 | <1e-4 | slr2018 | G0:0016772 | 0.0233 |
| slr1790 | G0:0048878 | <1e-4 | slr1990 | G0:0051171 | <1e-4 | slr1789 | G0:0022891 | <1e-4 | slr5024 | G0:0044446 | <1e-4 | sl10737 | G0:0008233 | 0.0233 |
| sl10272 | G0:0044106 | <1e-4 | sl11606 | G0:0009394 | <1e-4 | sl18004 | G0:0015405 | <1e-4 | sl16055 | G0:0005575 | <1e-4 | slr0468 | G0:0008233 | 0.0233 |
| slr7083 | G0:0006766 | <1e-4 | slr1161 | G0:0016053 | <1e-4 | sl10293 | G0:0022838 | <1e-4 | sl10661 | G0:0043226 | <1e-4 | ssr2803 | G0:0016772 | 0.0233 |
| sl11737 | G0:0048523 | <1e-4 | ss10242 | G0:0006220 | <1e-4 | ss12717 | G0:0015291 | <1e-4 | sl10630 | G0:0044422 | <1e-4 | sl10702 | G0:0016772 | 0.0233 |
| sl11191 | G0:0010468 | <1e-4 | sl11526 | G0:0071841 | <1e-4 | sl10281 | G0:0015291 | <1e-4 | slr1052 | G0:0044422 | <1e-4 | sl10180 | G0:0008233 | 0.0233 |
| slr0318 | G0:0048519 | <1e-4 | ssr2962 | G0:0009150 | <1e-4 | slr0813 | G0:0016741 | <1e-4 | slr1923 | G0:0043226 | <1e-4 | sl11582 | G0:0008233 | 0.0233 |
| sl15028 | G0:0006220 | <1e-4 | sl10451 | G0:0042180 | <1e-4 | slr1194 | G0:0022832 | <1e-4 | sl16052 | G0:0044444 | <1e-4 | sl10752 | G0:0008233 | 0.0233 |
| slr0708 | G0:0046164 | <1e-4 | sl10742 | G0:0019222 | <1e-4 | slr1699 | G0:0043167 | <1e-4 | slr1932 | G0:0044464 | <1e-4 | sl11660 | G0:0008233 | 0.0233 |
| sl11726 | G0:0006163 | <1e-4 | sl10283 | G0:0071842 | <1e-4 | slr0575 | G0:0016462 | <1e-4 | sl18032 | G0:0005575 | <1e-4 | sl11738 | G0:0008233 | 0.0233 |
| slr1699 | G0:0071841 | <1e-4 | sl10147 | G0:0055114 | <1e-4 | sl11068 | G0:0043492 | <1e-4 | slr0058 | G0:0044444 | <1e-4 | ssr1528 | G0:0008233 | 0.0233 |
| slr6064 | G0:0006811 | <1e-4 | sl11135 | G0:0009123 | <1e-4 | slr1875 | G0:0008171 | <1e-4 | sl11121 | G0:0044425 | <1e-4 | slr1767 | G0:0044237 | 0.023  |
| slr2003 | G0:0046164 | <1e-4 | sl15033 | G0:0009124 | <1e-4 | slr5012 | G0:0022803 | <1e-4 | slr1196 | G0:0005575 | <1e-4 | sl10586 | G0:0044237 | 0.023  |
| sl11915 | G0:0019752 | <1e-4 | sl10242 | G0:0048522 | <1e-4 | sl10266 | G0:0008171 | <1e-4 | sl15109 | G0:0044424 | <1e-4 | sl10183 | G0:0044237 | 0.023  |
| ss13829 | G0:0046128 | <1e-4 | sl11252 | G0:0045184 | <1e-4 | sl11862 | G0:0008171 | <1e-4 | sl10487 | G0:0044422 | <1e-4 | slr0607 | G0:0044237 | 0.023  |
| sl10319 | G0:0031326 | <1e-4 | slr2105 | G0:0009117 | <1e-4 | sl11485 | G0:0016741 | <1e-4 | ssr3189 | G0:0044422 | <1e-4 | sl10192 | G0:0044237 | 0.023  |
| sl10931 | G0:0006082 | <1e-4 | sl10645 | G0:0006732 | <1e-4 | sl11764 | G0:0022832 | <1e-4 | sl11293 | G0:0044444 | <1e-4 | slr1959 | G0:0044237 | 0.023  |
| sl11006 | G0:0046164 | <1e-4 | sl10424 | G0:0009165 | <1e-4 | slr0169 | G0:0015267 | <1e-4 | ssr1766 | G0:0044425 | <1e-4 | slr1098 | G0:0044237 | 0.023  |
| slr1378 | G0:0006721 | <1e-4 | slr2118 | G0:0016052 | <1e-4 | slr0962 | G0:0015405 | <1e-4 | slr1173 | G0:0044446 | <1e-4 | slr1906 | G0:0044237 | 0.023  |

|         |            |       |         |            |       |         |            |       |         |            |       |         |            |        |
|---------|------------|-------|---------|------------|-------|---------|------------|-------|---------|------------|-------|---------|------------|--------|
| slr5127 | G0:0043170 | <1e-4 | slr1573 | G0:0034660 | <1e-4 | slr1047 | G0:0015267 | <1e-4 | slr0924 | G0:0044424 | <1e-4 | ssl0739 | G0:0042626 | 0.0228 |
| sl11188 | G0:0009132 | <1e-4 | slr0168 | G0:0006220 | <1e-4 | slr1866 | G0:0022891 | <1e-4 | sl10216 | G0:0043226 | <1e-4 | slr1288 | G0:0042626 | 0.0228 |
| ssr2067 | G0:0009117 | <1e-4 | slr1799 | G0:0072521 | <1e-4 | sl10419 | G0:0015399 | <1e-4 | ssl2069 | G0:0044444 | <1e-4 | slr1809 | G0:0042626 | 0.0228 |
| sl11830 | G0:0051818 | <1e-4 | slr1301 | G0:0048523 | <1e-4 | ssr2047 | G0:0016817 | <1e-4 | slr0207 | G0:0044424 | <1e-4 | sl17065 | G0:0042626 | 0.0228 |
| slr7026 | G0:0044281 | <1e-4 | sl10751 | G0:0042451 | <1e-4 | sl10811 | G0:0022891 | <1e-4 | slr7010 | G0:0005575 | <1e-4 | sl10669 | G0:0042626 | 0.0228 |
| slr0038 | G0:0050794 | <1e-4 | ssr6024 | G0:0043549 | <1e-4 | ssr7035 | G0:0015291 | <1e-4 | slr0400 | G0:0044424 | <1e-4 | sl10688 | G0:0042626 | 0.0228 |
| slr1854 | G0:0050794 | <1e-4 | slr5126 | G0:0046164 | <1e-4 | sl11911 | G0:0015293 | <1e-4 | sl11304 | G0:0044444 | <1e-4 | sl11201 | G0:0042626 | 0.0228 |
| ssr2422 | G0:0019751 | <1e-4 | sl11250 | G0:0050789 | <1e-4 | sl10355 | G0:0015291 | <1e-4 | slr1863 | G0:0044422 | <1e-4 | sl10623 | G0:0042626 | 0.0228 |
| slr0907 | G0:0043436 | <1e-4 | sl11135 | G0:0031640 | <1e-4 | sl10933 | G0:0005342 | <1e-4 | slr1050 | G0:0044444 | <1e-4 | sl10412 | G0:0042626 | 0.0228 |
| ssl0410 | G0:0055114 | <1e-4 | slr0109 | G0:0050896 | <1e-4 | slr1365 | G0:0015291 | <1e-4 | slr0157 | G0:0005575 | <1e-4 | sl10871 | G0:0042626 | 0.0228 |
| slr0023 | G0:0019219 | <1e-4 | sl10181 | G0:0043170 | <1e-4 | slr6088 | G0:0015293 | <1e-4 | slr5102 | G0:0043226 | <1e-4 | slr0742 | G0:0042626 | 0.0228 |
| slr1638 | G0:0006766 | <1e-4 | slr0519 | G0:0009161 | <1e-4 | sl11911 | G0:0022803 | <1e-4 | slr5037 | G0:0044424 | <1e-4 | ssr2009 | G0:0042626 | 0.0228 |
| slr1103 | G0:0019222 | <1e-4 | sl11913 | G0:0043648 | <1e-4 | sl11698 | G0:0043167 | <1e-4 | ssr0761 | G0:0044425 | <1e-4 | slr0272 | G0:0042626 | 0.0228 |
| sl10703 | G0:0055114 | <1e-4 | slr6044 | G0:0019637 | <1e-4 | slr1056 | G0:0022832 | <1e-4 | slr6021 | G0:0005575 | <1e-4 | sl11505 | G0:0042626 | 0.0228 |
| sl10444 | G0:0009889 | <1e-4 | slr1864 | G0:0044281 | <1e-4 | sl10481 | G0:0022891 | <1e-4 | slr6045 | G0:0043226 | <1e-4 | sl11654 | G0:0042626 | 0.0228 |
| slr1603 | G0:0071554 | <1e-4 | slr0888 | G0:0009394 | <1e-4 | slr1240 | G0:0022892 | <1e-4 | sl10614 | G0:0043226 | <1e-4 | sl11512 | G0:0042626 | 0.0228 |
| sl11632 | G0:0009394 | <1e-4 | sl11532 | G0:0009991 | <1e-4 | slr1638 | G0:0008171 | <1e-4 | sl10995 | G0:0044444 | <1e-4 | sl10189 | G0:0042626 | 0.0228 |
| slr1677 | G0:0008150 | <1e-4 | sl10909 | G0:0019219 | <1e-4 | sl10369 | G0:0015075 | <1e-4 | slr1083 | G0:0005575 | <1e-4 | slr0680 | G0:0042626 | 0.0228 |
| ssl5064 | G0:0065007 | <1e-4 | sl10008 | G0:0006793 | <1e-4 | sl11232 | G0:0022892 | <1e-4 | sl10301 | G0:0044464 | <1e-4 | slr1541 | G0:0042626 | 0.0228 |
| slr1600 | G0:0046128 | <1e-4 | slr2032 | G0:0009150 | <1e-4 | slr1260 | G0:0043167 | <1e-4 | slr0606 | G0:0044424 | <1e-4 | slr0172 | G0:0042626 | 0.0228 |
| ssl8028 | G0:0043933 | <1e-4 | sl11135 | G0:0072522 | <1e-4 | sl10242 | G0:0022892 | <1e-4 | ssr2754 | G0:0044446 | <1e-4 | slr1074 | G0:0042626 | 0.0228 |
| slr0271 | G0:0090304 | <1e-4 | ssl2162 | G0:0006631 | <1e-4 | sl11601 | G0:0016462 | <1e-4 | sl10309 | G0:0044444 | <1e-4 | sl10319 | G0:0042626 | 0.0228 |
| slr0589 | G0:0055082 | <1e-4 | ssl5098 | G0:0016054 | <1e-4 | slr0865 | G0:0022890 | <1e-4 | sl10888 | G0:0005575 | <1e-4 | sl11950 | G0:0042626 | 0.0228 |
| sl11267 | G0:0045184 | <1e-4 | slr1419 | G0:0019751 | <1e-4 | sl10372 | G0:0016818 | <1e-4 | ssr1155 | G0:0044422 | <1e-4 | sl11239 | G0:0042626 | 0.0228 |
| ssr1558 | G0:0044282 | <1e-4 | sl11022 | G0:0050794 | <1e-4 | sl10048 | G0:0015075 | <1e-4 | sg10002 | G0:0044422 | <1e-4 | sl11344 | G0:0042626 | 0.0228 |
| slr8021 | G0:0050801 | <1e-4 | sl10911 | G0:0048522 | <1e-4 | slr1493 | G0:0015399 | <1e-4 | slr1737 | G0:0043226 | <1e-4 | slr0981 | G0:0042626 | 0.0228 |
| sl10451 | G0:0016054 | <1e-4 | sl11832 | G0:0009987 | <1e-4 | slr0601 | G0:0016462 | <1e-4 | slr0491 | G0:0005575 | <1e-4 | slr2115 | G0:0042626 | 0.0228 |
| slr1438 | G0:0072522 | <1e-4 | sl11765 | G0:0051179 | <1e-4 | slr0569 | G0:0008171 | <1e-4 | sl17077 | G0:0044422 | <1e-4 | slr1852 | G0:0042626 | 0.0228 |
| sl11201 | G0:0009150 | <1e-4 | slr1394 | G0:0042455 | <1e-4 | slr1923 | G0:0016818 | <1e-4 | ssr2067 | G0:0043226 | <1e-4 | slr1658 | G0:0042626 | 0.0228 |
| sl10301 | G0:0022607 | <1e-4 | slr0596 | G0:0019222 | <1e-4 | sl10473 | G0:0015399 | <1e-4 | slr2119 | G0:0005575 | <1e-4 | sl11251 | G0:0042626 | 0.0228 |
| slr1677 | G0:0009991 | <1e-4 | slr7071 | G0:0009893 | <1e-4 | slr0514 | G0:0016462 | <1e-4 | sl17055 | G0:0044424 | <1e-4 | sl10590 | G0:0042626 | 0.0228 |
| ssl2733 | G0:0071840 | <1e-4 | slr1074 | G0:0055086 | <1e-4 | sl10414 | G0:0022838 | <1e-4 | ssl6061 | G0:0044422 | <1e-4 | sl10837 | G0:0042626 | 0.0228 |
| sl11609 | G0:0008150 | <1e-4 | slr1210 | G0:0060255 | <1e-4 | slr1819 | G0:0015075 | <1e-4 | slr1918 | G0:0005575 | <1e-4 | sl10781 | G0:0042626 | 0.0228 |
| sl11606 | G0:0071554 | <1e-4 | ssr2201 | G0:0019752 | <1e-4 | sl11606 | G0:0016741 | <1e-4 | sl10149 | G0:0044422 | <1e-4 | sl10827 | G0:0042626 | 0.0228 |
| ssr1256 | G0:0006163 | <1e-4 | sl10532 | G0:0008150 | <1e-4 | sl10710 | G0:0022838 | <1e-4 | slr1885 | G0:0005575 | <1e-4 | sl11738 | G0:0042626 | 0.0228 |
| slr1957 | G0:0009892 | <1e-4 | ssr1698 | G0:0071841 | <1e-4 | ssr6003 | G0:0016741 | <1e-4 | sl11581 | G0:0005575 | <1e-4 | slr0789 | G0:0042626 | 0.0228 |
| slr2011 | G0:0044106 | <1e-4 | slr7073 | G0:0034660 | <1e-4 | sl10442 | G0:0015405 | <1e-4 | sl15026 | G0:0044444 | <1e-4 | sl10752 | G0:0042626 | 0.0228 |
| sl10545 | G0:0071554 | <1e-4 | slr6028 | G0:0019219 | <1e-4 | slr0144 | G0:0003674 | <1e-4 | slr0919 | G0:0044446 | <1e-4 | sl10787 | G0:0042626 | 0.0228 |
| sl11722 | G0:0008150 | <1e-4 | slr1209 | G0:0065007 | <1e-4 | ssr6099 | G0:0042623 | <1e-4 | slr0658 | G0:0044446 | <1e-4 | slr1493 | G0:0042626 | 0.0228 |
| slr1183 | G0:0008610 | <1e-4 | slr7073 | G0:0009263 | <1e-4 | slr7102 | G0:0022836 | <1e-4 | ssl0109 | G0:0044425 | <1e-4 | slr0935 | G0:0042626 | 0.0228 |
| slr1196 | G0:0072527 | <1e-4 | slr8022 | G0:0046164 | <1e-4 | slr1513 | G0:0015075 | <1e-4 | ssr6085 | G0:0044425 | <1e-4 | sl10156 | G0:0042626 | 0.0228 |
| sl11092 | G0:0034654 | <1e-4 | ssr1552 | G0:0042180 | <1e-4 | slr8044 | G0:0022836 | <1e-4 | ssl5103 | G0:0044446 | <1e-4 | slr0483 | G0:0042626 | 0.0228 |
| sl11675 | G0:0048878 | <1e-4 | sl10022 | G0:0045184 | <1e-4 | sl11135 | G0:0015399 | <1e-4 | sl10586 | G0:0005575 | <1e-4 | slr1070 | G0:0042626 | 0.0228 |
| slr1240 | G0:0055082 | <1e-4 | sl16052 | G0:0044260 | <1e-4 | sl18033 | G0:0022891 | <1e-4 | slr0730 | G0:0044422 | <1e-4 | sm10011 | G0:0042626 | 0.0228 |
| sl10875 | G0:0016052 | <1e-4 | sl11915 | G0:0034641 | <1e-4 | sl11164 | G0:0060089 | <1e-4 | sl11532 | G0:0044425 | <1e-4 | sl10740 | G0:0042626 | 0.0228 |
| slr8014 | G0:0065007 | <1e-4 | slr0168 | G0:0010556 | <1e-4 | slr0388 | G0:0015399 | <1e-4 | ssl7045 | G0:0043226 | <1e-4 | sl11938 | G0:0042626 | 0.0228 |
| slr0393 | G0:0072521 | <1e-4 | sl10656 | G0:0019751 | <1e-4 | slr1495 | G0:0043492 | <1e-4 | sl11698 | G0:0005575 | <1e-4 | ssr3300 | G0:0042626 | 0.0228 |
| slr0680 | G0:0009394 | <1e-4 | slr2080 | G0:0006721 | <1e-4 | sl10780 | G0:0008171 | <1e-4 | slr0064 | G0:0044424 | <1e-4 | slr0957 | G0:0042626 | 0.0228 |
| slr6073 | G0:0016053 | <1e-4 | ssr3402 | G0:0009124 | <1e-4 | slr0725 | G0:0015405 | <1e-4 | ssl0483 | G0:0044446 | <1e-4 | slr1258 | G0:0042626 | 0.0228 |
| ssr6020 | G0:0042455 | <1e-4 | sl11072 | G0:0072528 | <1e-4 | sl11355 | G0:0022892 | <1e-4 | slr1652 | G0:0005575 | <1e-4 | sl10188 | G0:0042626 | 0.0228 |
| slr0670 | G0:0009056 | <1e-4 | slr0680 | G0:0006721 | <1e-4 | slr1127 | G0:0016741 | <1e-4 | sl10481 | G0:0044464 | <1e-4 | sl11170 | G0:0042626 | 0.0228 |
| slr0789 | G0:0016052 | <1e-4 | slr2012 | G0:0001932 | <1e-4 | slr1142 | G0:0015267 | <1e-4 | sl10854 | G0:0043226 | <1e-4 | sl10588 | G0:0042626 | 0.0228 |
| sl10335 | G0:0055082 | <1e-4 | slr1918 | G0:0009124 | <1e-4 | slr6067 | G0:0008171 | <1e-4 | ssr3189 | G0:0044446 | <1e-4 | slr1544 | G0:0042626 | 0.0228 |
| ssl1263 | G0:0072528 | <1e-4 | ssl5096 | G0:0009260 | <1e-4 | ssr3300 | G0:0022890 | <1e-4 | slr6074 | G0:0044444 | <1e-4 | slr0491 | G0:0008168 | 0.0224 |

s111765 G0:0044283 <1e-4 s1r0869 G0:0065007 <1e-4 ssr0657 G0:0005342 <1e-4 ssr6030 G0:0044422 <1e-4 s111858 G0:0008168 0.0224  
s1r0249 G0:0006066 <1e-4 s110995 G0:0060255 <1e-4 s110857 G0:0003674 <1e-4 s110405 G0:0044446 <1e-4 s1r0810 G0:0008168 0.0224  
s110525 G0:0046483 <1e-4 s110176 G0:0009259 <1e-4 s111651 G0:0008171 <1e-4 s111675 G0:0044464 <1e-4 s1r1442 G0:0016740 0.0222  
ssr3300 G0:0051246 <1e-4 s1r1262 G0:0009123 <1e-4 s1r0313 G0:0016746 <1e-4 s1r2071 G0:0044444 <1e-4 s1r1681 G0:0016740 0.0222  
s110997 G0:0052111 <1e-4 s110788 G0:0006720 <1e-4 s111918 G0:0005342 <1e-4 s111201 G0:0005575 <1e-4 s1r2049 G0:0016740 0.0222  
s111531 G0:0006732 <1e-4 s111049 G0:0043648 <1e-4 s110930 G0:0022857 <1e-4 s1r7023 G0:0005575 <1e-4 ssr3402 G0:0016740 0.0222  
s116052 G0:0048878 <1e-4 s111696 G0:0019752 <1e-4 s1r1413 G0:0016817 <1e-4 ssr6002 G0:0044446 <1e-4 s1r5101 G0:0016740 0.0222  
s110444 G0:0044255 <1e-4 s111233 G0:0009987 <1e-4 s1r1940 G0:0022857 <1e-4 ss16035 G0:0005575 <1e-4 s110249 G0:0016740 0.0222  
s1r1788 G0:0051246 <1e-4 s1r1163 G0:0046483 <1e-4 s1r1811 G0:0022891 <1e-4 s110096 G0:0044422 <1e-4 s1r1790 G0:0016740 0.0222  
ss13379 G0:0044260 <1e-4 s1r1862 G0:0071842 <1e-4 s111960 G0:0015267 <1e-4 s1r0505 G0:0005575 <1e-4 s1r2060 G0:0016740 0.0222  
s117077 G0:0009056 <1e-4 s1r0059 G0:0043412 <1e-4 s1r1778 G0:0015405 <1e-4 ssr5092 G0:0005575 <1e-4 s1r7102 G0:0016740 0.0222  
s111158 G0:0006066 <1e-4 s1r1066 G0:0043933 <1e-4 s1r1275 G0:0016462 <1e-4 s1r1627 G0:0044425 <1e-4 s111158 G0:0016740 0.0222  
s111913 G0:0072524 <1e-4 ssr3570 G0:0009057 <1e-4 s1r6088 G0:0022890 <1e-4 s1r1195 G0:0044464 <1e-4 s110925 G0:0016740 0.0222  
ssr1407 G0:0006576 <1e-4 s1r0103 G0:0072528 <1e-4 s110910 G0:0016818 <1e-4 ssr7093 G0:0044425 <1e-4 s110691 G0:0016740 0.0222  
s1r5112 G0:0009141 <1e-4 s1r7071 G0:0009141 <1e-4 s111769 G0:0022832 <1e-4 s1r1464 G0:0043226 <1e-4 s111785 G0:0016740 0.0222  
s1r1907 G0:0019752 <1e-4 s1r0725 G0:0009889 <1e-4 s1r0816 G0:0015399 <1e-4 ss11377 G0:0005575 <1e-4 s1r0575 G0:0016740 0.0222  
s1r1827 G0:0006793 <1e-4 s1r1449 G0:0006732 <1e-4 ssr5106 G0:0022890 <1e-4 s110499 G0:0043226 <1e-4 s1r0634 G0:0016740 0.0222  
s111123 G0:0044248 <1e-4 s1r7015 G0:0071842 <1e-4 s110584 G0:0043167 <1e-4 ssr2142 G0:0044446 <1e-4 ssr3572 G0:0016740 0.0222  
s117030 G0:0006732 <1e-4 s1r1927 G0:0010468 <1e-4 s110909 G0:0022890 <1e-4 s111095 G0:0044464 <1e-4 s111233 G0:0016740 0.0222  
s117062 G0:0022411 <1e-4 s111510 G0:0072527 <1e-4 s110281 G0:0042623 <1e-4 s1r1339 G0:0044424 <1e-4 s111254 G0:0016740 0.0222  
s1r1340 G0:0009260 <1e-4 s1r7016 G0:0019219 <1e-4 s1r0680 G0:0003674 <1e-4 s1r0642 G0:0044464 <1e-4 ssr7017 G0:0016740 0.0222  
s1r2105 G0:0048519 <1e-4 s1r0948 G0:0051347 <1e-4 s111201 G0:0015077 <1e-4 s111547 G0:0005575 <1e-4 s1r1577 G0:0016740 0.0222  
s1r1468 G0:0046483 <1e-4 s110354 G0:0044275 <1e-4 s117033 G0:0016462 <1e-4 s1r1819 G0:0005575 <1e-4 s1r5053 G0:0016740 0.0222  
s1r1799 G0:0031640 <1e-4 ss11377 G0:0031326 <1e-4 s1r1210 G0:0022832 <1e-4 s110585 G0:0005575 <1e-4 s118019 G0:0016740 0.0222  
s111359 G0:0071841 <1e-4 s1r0442 G0:0051246 <1e-4 s111071 G0:0022892 <1e-4 s1r0192 G0:0005575 <1e-4 s111898 G0:0016740 0.0222  
s1r0601 G0:0043170 <1e-4 s1r0380 G0:0009059 <1e-4 s110394 G0:0015399 <1e-4 ssr6032 G0:0044422 <1e-4 s1r5073 G0:0016740 0.0222  
s111021 G0:0009889 <1e-4 s110286 G0:0006732 <1e-4 s110611 G0:0016741 <1e-4 ssr5074 G0:0044425 <1e-4 s1r1396 G0:0016740 0.0222  
s1r0397 G0:0006066 <1e-4 s110436 G0:0006066 <1e-4 s117077 G0:0016817 <1e-4 s1r6008 G0:0044425 <1e-4 ss11552 G0:0016740 0.0222  
s1r1895 G0:0009141 <1e-4 s111965 G0:0034654 <1e-4 s1r2105 G0:0015267 <1e-4 s1r1187 G0:0044425 <1e-4 ss18039 G0:0016740 0.0222  
s1r1179 G0:0016054 <1e-4 s110008 G0:0072521 <1e-4 s1r2117 G0:0022803 <1e-4 s110597 G0:0043226 <1e-4 s1r2004 G0:0016740 0.0222  
s111680 G0:0008150 <1e-4 s110847 G0:0044275 <1e-4 s1r7071 G0:0015075 <1e-4 s1r1394 G0:0043226 <1e-4 s1r0013 G0:0016740 0.0222  
s1r1773 G0:0033013 <1e-4 ss11690 G0:0072527 <1e-4 s111606 G0:0022891 <1e-4 s111775 G0:0043226 <1e-4 ssr8013 G0:0016740 0.0222  
s110985 G0:0005996 <1e-4 s111749 G0:0044275 <1e-4 s1r1195 G0:0060089 <1e-4 ssr0336 G0:0005575 <1e-4 s1r0238 G0:0016740 0.0222  
ss15031 G0:0006766 <1e-4 s111400 G0:0044283 <1e-4 s110752 G0:0015075 <1e-4 ss11255 G0:0044444 <1e-4 ss15113 G0:0016740 0.0222  
s1r5101 G0:0044003 <1e-4 s111634 G0:0006576 <1e-4 s110685 G0:0015399 <1e-4 s1r0514 G0:0044425 <1e-4 s1r7091 G0:0016740 0.0222  
s1r1885 G0:0042451 <1e-4 s111155 G0:0044260 <1e-4 ss15008 G0:0022836 <1e-4 s1r0610 G0:0044424 <1e-4 s1r0709 G0:0016740 0.0222  
s1r1117 G0:0043549 <1e-4 s110786 G0:0009308 <1e-4 s1r7095 G0:0016818 <1e-4 s1r0326 G0:0044464 <1e-4 s110060 G0:0016740 0.0222  
s1r7025 G0:0046483 <1e-4 s110497 G0:0008610 <1e-4 ss10294 G0:0043167 <1e-4 s1r5127 G0:0005575 <1e-4 s1r1114 G0:0016740 0.0222  
s111785 G0:0080090 <1e-4 s110737 G0:0006720 <1e-4 ssr5120 G0:0016746 <1e-4 ssr5106 G0:0044446 <1e-4 s1r1513 G0:0016740 0.0222  
s1r1240 G0:0048522 <1e-4 ssr5019 G0:0008610 <1e-4 s1r1162 G0:0022803 <1e-4 s1r0270 G0:0043226 <1e-4 s1r1737 G0:0016740 0.0222  
s110670 G0:0051246 <1e-4 s110875 G0:0050794 <1e-4 s1r1886 G0:0015267 <1e-4 s1r2111 G0:0044422 <1e-4 s1r7057 G0:0016740 0.0222  
s1r0503 G0:0051246 <1e-4 s1r1025 G0:0051347 <1e-4 ssr2142 G0:0015293 <1e-4 ss15114 G0:0044446 <1e-4 s1r1670 G0:0016740 0.0222  
s111036 G0:0016054 <1e-4 s1r0606 G0:0046483 <1e-4 s115006 G0:0022838 <1e-4 s1r1383 G0:0044425 <1e-4 s1r1170 G0:0016740 0.0222  
ssr2615 G0:0009991 <1e-4 s1r7098 G0:0031640 <1e-4 s1r1116 G0:0022892 <1e-4 s117028 G0:0043226 <1e-4 s110479 G0:0016740 0.0222  
s110688 G0:0019362 <1e-4 s1r1557 G0:0044260 <1e-4 s110685 G0:0015293 <1e-4 s1r1174 G0:0044424 <1e-4 s1r7060 G0:0016740 0.0222  
s1r7011 G0:0052111 <1e-4 s110372 G0:0043648 <1e-4 s1r0607 G0:0015399 <1e-4 ss11004 G0:0044424 <1e-4 ssr6019 G0:0016740 0.0222  
s111455 G0:0046907 <1e-4 s111399 G0:0044255 <1e-4 s1r0852 G0:0042623 <1e-4 s111442 G0:0005575 <1e-4 ss17042 G0:0016740 0.0222  
s1r0082 G0:0008150 <1e-4 s1r0725 G0:0009199 <1e-4 s1r1790 G0:0015293 <1e-4 s1r0423 G0:0044446 <1e-4 s1r0516 G0:0016740 0.0222  
ssr2317 G0:0022607 <1e-4 s1r0613 G0:0065007 <1e-4 s1r0392 G0:0022832 <1e-4 s1r2101 G0:0044424 <1e-4 s1r5126 G0:0016740 0.0222  
s110630 G0:0044281 <1e-4 s110590 G0:0044106 <1e-4 ssr7035 G0:0022832 <1e-4 ssr7079 G0:0044446 <1e-4 s1r6103 G0:0016740 0.0222  
s110310 G0:0006732 <1e-4 s111858 G0:0043170 <1e-4 ss18008 G0:0015399 <1e-4 ssr5106 G0:0005575 <1e-4 ss13829 G0:0016740 0.0222  
s1r0586 G0:0072522 <1e-4 s1r0602 G0:0019752 <1e-4 s1r1699 G0:0016746 <1e-4 s1r0351 G0:0044464 <1e-4 ssr8047 G0:0016740 0.0222  
ss12781 G0:0044275 <1e-4 s1r1177 G0:0009144 <1e-4 ss11923 G0:0016462 <1e-4 s1r1638 G0:0044444 <1e-4 s1r2052 G0:0016740 0.0222  
ss12996 G0:0071554 <1e-4 ss12471 G0:0006220 <1e-4 s110615 G0:0016818 <1e-4 s110944 G0:0044444 <1e-4 ssr6086 G0:0016740 0.0222

|         |            |       |         |            |       |         |            |       |          |            |       |         |            |        |
|---------|------------|-------|---------|------------|-------|---------|------------|-------|----------|------------|-------|---------|------------|--------|
| slr0179 | G0:0044260 | <1e-4 | slr1236 | G0:0009150 | <1e-4 | ssl7046 | G0:0022890 | <1e-4 | sl10272  | G0:0044446 | <1e-4 | ssl5068 | G0:0016740 | 0.0222 |
| ssl0294 | G0:0043648 | <1e-4 | slr0872 | G0:0010468 | <1e-4 | slr1570 | G0:0016818 | <1e-4 | sl10861  | G0:0005575 | <1e-4 | sl11698 | G0:0016740 | 0.0222 |
| slr0655 | G0:0019219 | <1e-4 | sl10743 | G0:0043412 | <1e-4 | slr1800 | G0:0060089 | <1e-4 | sl10482  | G0:0044422 | <1e-4 | ssr1041 | G0:0016740 | 0.0222 |
| ssr6086 | G0:0043933 | <1e-4 | slr1676 | G0:0034641 | <1e-4 | sl11158 | G0:0015077 | <1e-4 | slr7013  | G0:0044422 | <1e-4 | slr0816 | G0:0016740 | 0.0222 |
| sl15028 | G0:0033013 | <1e-4 | sl11880 | G0:0072528 | <1e-4 | slr0272 | G0:0015291 | <1e-4 | sl10266  | G0:0044422 | <1e-4 | sl10047 | G0:0016740 | 0.0222 |
| ssl1690 | G0:0016053 | <1e-4 | sl10863 | G0:0055114 | <1e-4 | slr1862 | G0:0022892 | <1e-4 | ssr3532  | G0:0044444 | <1e-4 | slr5127 | G0:0016740 | 0.0222 |
| slr1290 | G0:0045184 | <1e-4 | slr6067 | G0:0048523 | <1e-4 | slr1623 | G0:0022857 | <1e-4 | ssl1498  | G0:0043226 | <1e-4 | slr1599 | G0:0016740 | 0.0222 |
| ssl1379 | G0:0009144 | <1e-4 | slr5101 | G0:0019752 | <1e-4 | sl17069 | G0:0022857 | <1e-4 | sl10284  | G0:0044444 | <1e-4 | slr5112 | G0:0016740 | 0.0222 |
| slr2012 | G0:0019362 | <1e-4 | slr0241 | G0:0019362 | <1e-4 | slr0217 | G0:0016818 | <1e-4 | sl10007  | G0:0044424 | <1e-4 | slr1570 | G0:0016740 | 0.0222 |
| sl11671 | G0:0019219 | <1e-4 | slr7081 | G0:0006793 | <1e-4 | slr1261 | G0:0015399 | <1e-4 | slr0300  | G0:0005575 | <1e-4 | ssl5091 | G0:0016740 | 0.0222 |
| ssr6026 | G0:0006576 | <1e-4 | ssr3532 | G0:0022607 | <1e-4 | slr0358 | G0:0060089 | <1e-4 | ssl15108 | G0:0044446 | <1e-4 | ssr0336 | G0:0016740 | 0.0222 |
| slr0300 | G0:0031323 | <1e-4 | slr0651 | G0:0072527 | <1e-4 | sl11891 | G0:0042623 | <1e-4 | sl17055  | G0:0005575 | <1e-4 | sl10069 | G0:0016740 | 0.0222 |
| slr1914 | G0:0022607 | <1e-4 | sl11201 | G0:0055114 | <1e-4 | ssr1155 | G0:0016741 | <1e-4 | slr1110  | G0:0044425 | <1e-4 | slr0725 | G0:0016740 | 0.0222 |
| sm10011 | G0:0043170 | <1e-4 | slr5077 | G0:0046164 | <1e-4 | sl10148 | G0:0016741 | <1e-4 | slr0241  | G0:0044464 | <1e-4 | slr0645 | G0:0016740 | 0.0222 |
| sl16052 | G0:0031323 | <1e-4 | ssl1004 | G0:0072521 | <1e-4 | slr1958 | G0:0016818 | <1e-4 | sl10984  | G0:0044444 | <1e-4 | sl11911 | G0:0016740 | 0.0222 |
| ssl2162 | G0:0051234 | <1e-4 | ssl2384 | G0:0009199 | <1e-4 | sl11373 | G0:0022832 | <1e-4 | slr0569  | G0:0044425 | <1e-4 | slr0509 | G0:0016740 | 0.0222 |
| slr6104 | G0:0019219 | <1e-4 | sl10478 | G0:0044106 | <1e-4 | slr0708 | G0:0015291 | <1e-4 | sl10602  | G0:0005575 | <1e-4 | ssl3549 | G0:0016740 | 0.0222 |
| sl11388 | G0:0051171 | <1e-4 | slr6104 | G0:0071840 | <1e-4 | slr0989 | G0:0015399 | <1e-4 | slr2005  | G0:0044446 | <1e-4 | ssl2384 | G0:0016740 | 0.0222 |
| slr0263 | G0:0072521 | <1e-4 | sl10786 | G0:0071554 | <1e-4 | sl11052 | G0:0022836 | <1e-4 | slr8022  | G0:0044444 | <1e-4 | sl18011 | G0:0016740 | 0.0222 |
| slr6064 | G0:0072522 | <1e-4 | slr0664 | G0:0071840 | <1e-4 | sl11222 | G0:0043167 | <1e-4 | slr2125  | G0:0043226 | <1e-4 | slr0271 | G0:0016740 | 0.0222 |
| slr1935 | G0:0010468 | <1e-4 | slr5073 | G0:0009987 | <1e-4 | ssl2996 | G0:0016741 | <1e-4 | slr1406  | G0:0044422 | <1e-4 | ssr6062 | G0:0016740 | 0.0222 |
| slr0250 | G0:0031326 | <1e-4 | slr6047 | G0:0048518 | <1e-4 | sl10793 | G0:0022836 | <1e-4 | sl11396  | G0:0005575 | <1e-4 | slr1628 | G0:0016740 | 0.0222 |
| slr0060 | G0:0044255 | <1e-4 | sl10864 | G0:0009308 | <1e-4 | slr1415 | G0:0022803 | <1e-4 | slr6087  | G0:0005575 | <1e-4 | sl16052 | G0:0016740 | 0.0222 |
| slr1174 | G0:0042180 | <1e-4 | slr1668 | G0:0044106 | <1e-4 | slr0491 | G0:0022891 | <1e-4 | slr1865  | G0:0044425 | <1e-4 | sl10670 | G0:0016740 | 0.0222 |
| slr1206 | G0:0055114 | <1e-4 | slr1815 | G0:0044271 | <1e-4 | slr2018 | G0:0015399 | <1e-4 | sl10147  | G0:0044424 | <1e-4 | slr6104 | G0:0016740 | 0.0222 |
| slr6068 | G0:0009991 | <1e-4 | sl10281 | G0:0051188 | <1e-4 | slr6008 | G0:0042623 | <1e-4 | ssr2755  | G0:0044464 | <1e-4 | ssr2998 | G0:0016740 | 0.0222 |
| ssr2998 | G0:0048518 | <1e-4 | sl10625 | G0:0006082 | <1e-4 | slr1173 | G0:0022857 | <1e-4 | sl10762  | G0:0044444 | <1e-4 | sl10253 | G0:0016740 | 0.0222 |
| sl18001 | G0:0043436 | <1e-4 | sl10763 | G0:0006066 | <1e-4 | sl11053 | G0:0022832 | <1e-4 | slr7073  | G0:0044444 | <1e-4 | sl10847 | G0:0016740 | 0.0222 |
| slr2070 | G0:0019362 | <1e-4 | slr0605 | G0:0019222 | <1e-4 | slr0606 | G0:0016741 | <1e-4 | sl11632  | G0:0044425 | <1e-4 | sl17087 | G0:0016740 | 0.0222 |
| slr1163 | G0:0051347 | <1e-4 | sl11464 | G0:0033013 | <1e-4 | sl11433 | G0:0060089 | <1e-4 | slr1593  | G0:0044464 | <1e-4 | sl10372 | G0:0016740 | 0.0222 |
| ssr6085 | G0:0009142 | <1e-4 | slr0742 | G0:0031323 | <1e-4 | slr6044 | G0:0022890 | <1e-4 | ssr2998  | G0:0044422 | <1e-4 | sl15030 | G0:0016740 | 0.0222 |
| slr0708 | G0:0022411 | <1e-4 | ssl3615 | G0:0048878 | <1e-4 | slr0273 | G0:0005342 | <1e-4 | sl10647  | G0:0044422 | <1e-4 | ssr6078 | G0:0016740 | 0.0222 |
| sl10858 | G0:0019637 | <1e-4 | sl10659 | G0:0045184 | <1e-4 | ssl3291 | G0:0015291 | <1e-4 | ssr2049  | G0:0005575 | <1e-4 | slr0521 | G0:0016740 | 0.0222 |
| sl17067 | G0:0009117 | <1e-4 | slr1507 | G0:0009991 | <1e-4 | sl10597 | G0:0043167 | <1e-4 | slr0359  | G0:0044446 | <1e-4 | sl10563 | G0:0016740 | 0.0222 |
| sl10736 | G0:0051818 | <1e-4 | slr0981 | G0:0016052 | <1e-4 | ssl1378 | G0:0015405 | <1e-4 | slr0300  | G0:0044422 | <1e-4 | sl11095 | G0:0016740 | 0.0222 |
| sl11715 | G0:0050801 | <1e-4 | ssl7007 | G0:0009117 | <1e-4 | slr0975 | G0:0022892 | <1e-4 | slr0172  | G0:0044444 | <1e-4 | sl10394 | G0:0016740 | 0.0222 |
| slr1940 | G0:0009991 | <1e-4 | slr0729 | G0:0051818 | <1e-4 | slr1474 | G0:0008171 | <1e-4 | ssr6086  | G0:0043226 | <1e-4 | sl17067 | G0:0016740 | 0.0222 |
| slr7014 | G0:0044260 | <1e-4 | sl11751 | G0:0065007 | <1e-4 | slr1951 | G0:0016817 | <1e-4 | sl11528  | G0:0044424 | <1e-4 | sl10496 | G0:0016740 | 0.0222 |
| slr8044 | G0:0071840 | <1e-4 | slr0262 | G0:0009260 | <1e-4 | sl11191 | G0:0008171 | <1e-4 | slr0914  | G0:0044446 | <1e-4 | ssl1300 | G0:0016740 | 0.0222 |
| sl10656 | G0:0006721 | <1e-4 | slr0505 | G0:0051246 | <1e-4 | sl15089 | G0:0015267 | <1e-4 | sl11915  | G0:0043226 | <1e-4 | ssl7007 | G0:0016740 | 0.0222 |
| sl11485 | G0:0034654 | <1e-4 | slr1101 | G0:0006721 | <1e-4 | slr1419 | G0:0016462 | <1e-4 | sl18027  | G0:0044446 | <1e-4 | sl11188 | G0:0016740 | 0.0222 |
| slr1668 | G0:0019219 | <1e-4 | sl10355 | G0:0051171 | <1e-4 | slr1069 | G0:0042623 | <1e-4 | ssr2848  | G0:0044422 | <1e-4 | sl11381 | G0:0016740 | 0.0222 |
| sl11002 | G0:0048519 | <1e-4 | sl11921 | G0:0046164 | <1e-4 | sl11652 | G0:0022857 | <1e-4 | slr0172  | G0:0044425 | <1e-4 | slr1623 | G0:0016740 | 0.0222 |
| slr6029 | G0:0009260 | <1e-4 | sl12007 | G0:0009141 | <1e-4 | sl10710 | G0:0060089 | <1e-4 | sl11832  | G0:0043226 | <1e-4 | slr1875 | G0:0016740 | 0.0222 |
| slr1774 | G0:0072522 | <1e-4 | sl11698 | G0:0019219 | <1e-4 | slr7083 | G0:0022803 | <1e-4 | ssl0294  | G0:0044422 | <1e-4 | slr1163 | G0:0016740 | 0.0222 |
| slr1170 | G0:0009309 | <1e-4 | slr2004 | G0:0065007 | <1e-4 | slr1702 | G0:0015399 | <1e-4 | slr5116  | G0:0044446 | <1e-4 | sl10405 | G0:0016740 | 0.0222 |
| sl11785 | G0:0009124 | <1e-4 | sl15089 | G0:0046483 | <1e-4 | ssl0109 | G0:0022832 | <1e-4 | slr0491  | G0:0044444 | <1e-4 | sl11049 | G0:0016740 | 0.0222 |
| sl11426 | G0:0008150 | <1e-4 | sl10984 | G0:0010556 | <1e-4 | sl11570 | G0:0005342 | <1e-4 | sl11510  | G0:0044425 | <1e-4 | sl11765 | G0:0042626 | 0.0221 |
| sl10191 | G0:0008150 | <1e-4 | sl11532 | G0:0080090 | <1e-4 | ssr8013 | G0:0005342 | <1e-4 | slr1442  | G0:0005575 | <1e-4 | slr0362 | G0:0042626 | 0.0221 |
| sl10072 | G0:0044260 | <1e-4 | ssl2064 | G0:0043549 | <1e-4 | slr6091 | G0:0022890 | <1e-4 | slr0575  | G0:0044424 | <1e-4 | sl11400 | G0:0042626 | 0.0221 |
| sl10327 | G0:0033013 | <1e-4 | ssl2162 | G0:0019219 | <1e-4 | ssr2781 | G0:0022892 | <1e-4 | sl11961  | G0:0044425 | <1e-4 | sl10328 | G0:0042626 | 0.0221 |
| sl15026 | G0:0080090 | <1e-4 | slr7092 | G0:0016053 | <1e-4 | slr1880 | G0:0008171 | <1e-4 | sl11630  | G0:0044464 | <1e-4 | sl11862 | G0:0042626 | 0.0221 |
| sl10864 | G0:0046907 | <1e-4 | sl11414 | G0:0044106 | <1e-4 | sl10696 | G0:0022890 | <1e-4 | sl11352  | G0:0044424 | <1e-4 | sl15006 | G0:0042626 | 0.0221 |
| sl11921 | G0:0009309 | <1e-4 | slr7037 | G0:0046128 | <1e-4 | ssr2439 | G0:0015075 | <1e-4 | slr1932  | G0:0044424 | <1e-4 | slr1998 | G0:0042626 | 0.0221 |



|         |            |       |         |            |       |         |            |       |         |            |       |         |            |        |
|---------|------------|-------|---------|------------|-------|---------|------------|-------|---------|------------|-------|---------|------------|--------|
| slr0360 | G0:0071496 | <1e-4 | s111163 | G0:0009991 | <1e-4 | s111267 | G0:0022892 | <1e-4 | slr1450 | G0:0044444 | <1e-4 | s111485 | G0:0042626 | 0.0221 |
| s111902 | G0:0072521 | <1e-4 | slr0960 | G0:0009161 | <1e-4 | s110265 | G0:0022832 | <1e-4 | s110742 | G0:0044444 | <1e-4 | slr1104 | G0:0042626 | 0.0221 |
| s110283 | G0:0071554 | <1e-4 | s111660 | G0:0044283 | <1e-4 | s110669 | G0:0043167 | <1e-4 | s111192 | G0:0044444 | <1e-4 | slr1276 | G0:0042626 | 0.0221 |
| s110060 | G0:0001932 | <1e-4 | s111902 | G0:0006811 | <1e-4 | s110044 | G0:0015405 | <1e-4 | s111761 | G0:0044444 | <1e-4 | slr7012 | G0:0042626 | 0.0221 |
| slr1419 | G0:0046394 | <1e-4 | slr1442 | G0:0046483 | <1e-4 | slr6045 | G0:0003674 | <1e-4 | slr0607 | G0:0044425 | <1e-4 | s111053 | G0:0042626 | 0.0221 |
| slr1847 | G0:0043412 | <1e-4 | s111232 | G0:0051716 | <1e-4 | s111464 | G0:0022836 | <1e-4 | s111247 | G0:0044444 | <1e-4 | slr6074 | G0:0042626 | 0.0221 |
| slr5126 | G0:0043933 | <1e-4 | s117034 | G0:0006811 | <1e-4 | slr1376 | G0:0022891 | <1e-4 | slr1303 | G0:0044425 | <1e-4 | slr0769 | G0:0042626 | 0.0221 |
| ssl1378 | G0:0031323 | <1e-4 | slr2027 | G0:0060255 | <1e-4 | s111442 | G0:0015291 | <1e-4 | slr1852 | G0:0044424 | <1e-4 | s111880 | G0:0042626 | 0.0221 |
| slr0211 | G0:0046483 | <1e-4 | slr1864 | G0:0046394 | <1e-4 | s110837 | G0:0022890 | <1e-4 | slr1927 | G0:0044464 | <1e-4 | s110481 | G0:0042626 | 0.0221 |
| s111882 | G0:0031323 | <1e-4 | slr0964 | G0:0009394 | <1e-4 | s110539 | G0:0022832 | <1e-4 | slr0740 | G0:0005575 | <1e-4 | slr1188 | G0:0042626 | 0.0221 |
| slr1573 | G0:0048878 | <1e-4 | s110558 | G0:0009132 | <1e-4 | slr1667 | G0:0043167 | <1e-4 | s110397 | G0:0005575 | <1e-4 | slr0049 | G0:0042626 | 0.0221 |
| s111109 | G0:0065007 | <1e-4 | ssl3382 | G0:0016052 | <1e-4 | slr7102 | G0:0022892 | <1e-4 | slr0049 | G0:0005575 | <1e-4 | s116054 | G0:0042626 | 0.0221 |
| slr1122 | G0:0009142 | <1e-4 | s110208 | G0:0019219 | <1e-4 | s111715 | G0:0022832 | <1e-4 | slr0695 | G0:0043226 | <1e-4 | ss13451 | G0:0042626 | 0.0221 |
| s111142 | G0:0051716 | <1e-4 | s111726 | G0:0006811 | <1e-4 | slr0479 | G0:0008171 | <1e-4 | slr0397 | G0:0044444 | <1e-4 | s117064 | G0:0042626 | 0.0221 |
| ssr5011 | G0:0044275 | <1e-4 | slr0243 | G0:0044248 | <1e-4 | s110524 | G0:0043167 | <1e-4 | slr1977 | G0:0044444 | <1e-4 | ss12781 | G0:0042626 | 0.0221 |
| ssr7079 | G0:0019219 | <1e-4 | s111749 | G0:0043170 | <1e-4 | slr5126 | G0:0043167 | <1e-4 | s111717 | G0:0044444 | <1e-4 | s110176 | G0:0042626 | 0.0221 |
| slr1533 | G0:0019637 | <1e-4 | ssr6024 | G0:0009991 | <1e-4 | slr0810 | G0:0015077 | <1e-4 | slr0458 | G0:0044422 | <1e-4 | slr6100 | G0:0042626 | 0.0221 |
| s110518 | G0:0065007 | <1e-4 | slr0299 | G0:0044003 | <1e-4 | s110543 | G0:0042623 | <1e-4 | s110888 | G0:0043226 | <1e-4 | slr6039 | G0:0042626 | 0.0221 |
| slr1647 | G0:0080090 | <1e-4 | s110445 | G0:0009262 | <1e-4 | s110871 | G0:0016462 | <1e-4 | s110444 | G0:0044422 | <1e-4 | ssr6020 | G0:0042626 | 0.0221 |
| slr1442 | G0:0031640 | <1e-4 | ssr2422 | G0:0031323 | <1e-4 | slr6080 | G0:0015399 | <1e-4 | ssr6026 | G0:0043226 | <1e-4 | s110423 | G0:0042626 | 0.0221 |
| slr0606 | G0:0044106 | <1e-4 | s110645 | G0:0044260 | <1e-4 | s110071 | G0:0015267 | <1e-4 | slr1674 | G0:0044425 | <1e-4 | slr1566 | G0:0042626 | 0.0221 |
| slr1464 | G0:0044271 | <1e-4 | slr7013 | G0:0080090 | <1e-4 | slr1095 | G0:0015291 | <1e-4 | s117030 | G0:0044422 | <1e-4 | s110611 | G0:0042626 | 0.0221 |
| slr1023 | G0:0008150 | <1e-4 | slr0587 | G0:0009263 | <1e-4 | s110168 | G0:0022832 | <1e-4 | s111378 | G0:0043226 | <1e-4 | s110487 | G0:0042626 | 0.0221 |
| slr2049 | G0:0043549 | <1e-4 | s111218 | G0:0034654 | <1e-4 | slr1807 | G0:0060089 | <1e-4 | s110905 | G0:0005575 | <1e-4 | s111921 | G0:0042626 | 0.0221 |
| s111698 | G0:0044275 | <1e-4 | s110524 | G0:0009123 | <1e-4 | slr2018 | G0:0043492 | <1e-4 | s111613 | G0:0044444 | <1e-4 | slr1753 | G0:0042626 | 0.0221 |
| ss17045 | G0:0055082 | <1e-4 | slr0581 | G0:0051186 | <1e-4 | s111926 | G0:0015077 | <1e-4 | s111526 | G0:0044444 | <1e-4 | s110063 | G0:0042626 | 0.0221 |
| ssr1391 | G0:0051246 | <1e-4 | s110268 | G0:0019222 | <1e-4 | s110783 | G0:0016817 | <1e-4 | slr0731 | G0:0044446 | <1e-4 | slr0065 | G0:0042626 | 0.0221 |
| slr1958 | G0:0080090 | <1e-4 | ssr5121 | G0:0046164 | <1e-4 | s110180 | G0:0003674 | <1e-4 | s110888 | G0:0044425 | <1e-4 | s110406 | G0:0042626 | 0.0221 |
| slr6014 | G0:0005996 | <1e-4 | slr1179 | G0:0071554 | <1e-4 | s118011 | G0:0022891 | <1e-4 | slr2027 | G0:0044464 | <1e-4 | slr1068 | G0:0042626 | 0.0221 |
| slr7081 | G0:0046164 | <1e-4 | slr1854 | G0:0009132 | <1e-4 | s110702 | G0:0016746 | <1e-4 | s111239 | G0:0005575 | <1e-4 | s111884 | G0:0042626 | 0.0221 |
| slr0416 | G0:0031640 | <1e-4 | slr1636 | G0:0065007 | <1e-4 | s115067 | G0:0016817 | <1e-4 | slr0667 | G0:0044424 | <1e-4 | slr0960 | G0:0042626 | 0.0221 |
| slr0232 | G0:0009132 | <1e-4 | slr0789 | G0:0051186 | <1e-4 | slr0967 | G0:0015077 | <1e-4 | slr5073 | G0:0005575 | <1e-4 | slr0196 | G0:0042626 | 0.0221 |
| s110588 | G0:0009308 | <1e-4 | s110503 | G0:0009117 | <1e-4 | ssr5011 | G0:0043167 | <1e-4 | s111203 | G0:0005575 | <1e-4 | slr1814 | G0:0042626 | 0.0221 |
| s111698 | G0:0009263 | <1e-4 | sml0011 | G0:0071496 | <1e-4 | ss12971 | G0:0043492 | <1e-4 | ss11923 | G0:0005575 | <1e-4 | s111252 | G0:0042626 | 0.0221 |
| slr1875 | G0:0072527 | <1e-4 | ss15099 | G0:0006766 | <1e-4 | ssr1765 | G0:0022857 | <1e-4 | s110237 | G0:0044424 | <1e-4 | ss15045 | G0:0042626 | 0.0221 |
| s115030 | G0:0009161 | <1e-4 | s115089 | G0:0051818 | <1e-4 | slr0751 | G0:0008171 | <1e-4 | s111488 | G0:0044424 | <1e-4 | slr2010 | G0:0042626 | 0.0221 |
| slr0317 | G0:0019222 | <1e-4 | s110456 | G0:0009262 | <1e-4 | s111135 | G0:0015267 | <1e-4 | s110810 | G0:0044425 | <1e-4 | s110518 | G0:0042626 | 0.0221 |
| slr1363 | G0:0006091 | <1e-4 | ssr1528 | G0:0006732 | <1e-4 | slr0575 | G0:0003674 | <1e-4 | ssr6027 | G0:0044422 | <1e-4 | slr6063 | G0:0042626 | 0.0221 |
| slr0728 | G0:0006091 | <1e-4 | s111934 | G0:0090304 | <1e-4 | s111272 | G0:0015405 | <1e-4 | s110294 | G0:0005575 | <1e-4 | ss13142 | G0:0042626 | 0.0221 |
| slr0613 | G0:0006631 | <1e-4 | s110781 | G0:0051171 | <1e-4 | ss17048 | G0:0016818 | <1e-4 | slr2025 | G0:0044444 | <1e-4 | s118002 | G0:0042626 | 0.0221 |
| s110595 | G0:0005996 | <1e-4 | slr1670 | G0:0046907 | <1e-4 | slr0959 | G0:0008171 | <1e-4 | s111464 | G0:0044464 | <1e-4 | ssr0335 | G0:0042626 | 0.0221 |
| s111671 | G0:0044271 | <1e-4 | slr0801 | G0:0016053 | <1e-4 | s111092 | G0:0015075 | <1e-4 | slr1425 | G0:0044424 | <1e-4 | ssr5117 | G0:0042626 | 0.0221 |
| s110498 | G0:0009987 | <1e-4 | slr1425 | G0:0046128 | <1e-4 | slr1852 | G0:0003674 | <1e-4 | s110456 | G0:0005575 | <1e-4 | s111160 | G0:0042626 | 0.0221 |
| s111954 | G0:0006082 | <1e-4 | slr0192 | G0:0009142 | <1e-4 | slr7015 | G0:0022890 | <1e-4 | s110447 | G0:0044424 | <1e-4 | s110751 | G0:0042626 | 0.0221 |
| s111151 | G0:0071840 | <1e-4 | slr1593 | G0:0019637 | <1e-4 | ssr2711 | G0:0015293 | <1e-4 | s110177 | G0:0044425 | <1e-4 | slr6064 | G0:0042626 | 0.0221 |
| ssr3122 | G0:0055114 | <1e-4 | s110558 | G0:0051171 | <1e-4 | slr0702 | G0:0022892 | <1e-4 | slr0345 | G0:0005575 | <1e-4 | s110265 | G0:0042626 | 0.0221 |
| s111217 | G0:0006066 | <1e-4 | slr1053 | G0:0050789 | <1e-4 | slr1163 | G0:0015267 | <1e-4 | s110638 | G0:0044424 | <1e-4 | slr5018 | G0:0042626 | 0.0221 |
| s110360 | G0:0009889 | <1e-4 | s111495 | G0:0009056 | <1e-4 | s111715 | G0:0016741 | <1e-4 | slr1919 | G0:0044424 | <1e-4 | s110815 | G0:0042626 | 0.0221 |
| s110294 | G0:0009057 | <1e-4 | s110811 | G0:0010468 | <1e-4 | slr1513 | G0:0005342 | <1e-4 | slr0801 | G0:0044446 | <1e-4 | ss15129 | G0:0042626 | 0.0221 |
| slr1573 | G0:0016054 | <1e-4 | s111681 | G0:0046907 | <1e-4 | s110811 | G0:0016818 | <1e-4 | slr2110 | G0:0044446 | <1e-4 | slr7083 | G0:0042626 | 0.0221 |
| slr1056 | G0:0009889 | <1e-4 | s111956 | G0:0009260 | <1e-4 | slr5118 | G0:0016462 | <1e-4 | s110301 | G0:0005575 | <1e-4 | s111025 | G0:0042626 | 0.0221 |
| s110482 | G0:0009262 | <1e-4 | slr2011 | G0:0072521 | <1e-4 | s110266 | G0:0005342 | <1e-4 | s111222 | G0:0044446 | <1e-4 | ss11972 | G0:0042626 | 0.0221 |
| s117087 | G0:0009057 | <1e-4 | slr1032 | G0:0055114 | <1e-4 | slr0431 | G0:0016462 | <1e-4 | slr1378 | G0:0044422 | <1e-4 | s111509 | G0:0042626 | 0.0221 |
| s110481 | G0:0080090 | <1e-4 | s110413 | G0:0072527 | <1e-4 | slr1935 | G0:0022832 | <1e-4 | ss12807 | G0:0043226 | <1e-4 | s110284 | G0:0042626 | 0.0221 |

|         |            |       |         |            |       |         |            |       |         |            |       |         |            |        |
|---------|------------|-------|---------|------------|-------|---------|------------|-------|---------|------------|-------|---------|------------|--------|
| ssl1577 | G0:0006720 | <1e-4 | sl10984 | G0:0009142 | <1e-4 | sl11372 | G0:0043167 | <1e-4 | slr1413 | G0:0044425 | <1e-4 | slr7011 | G0:0042626 | 0.0221 |
| sl10478 | G0:0048518 | <1e-4 | slr1533 | G0:0006631 | <1e-4 | ssl3291 | G0:0016462 | <1e-4 | ssl0410 | G0:0044425 | <1e-4 | ssl2920 | G0:0042626 | 0.0221 |
| ssr6083 | G0:0043170 | <1e-4 | slr6081 | G0:0055114 | <1e-4 | slr7059 | G0:0022838 | <1e-4 | sl10188 | G0:0044425 | <1e-4 | sl10168 | G0:0042626 | 0.0221 |
| ssr1407 | G0:0051347 | <1e-4 | slr0634 | G0:0072521 | <1e-4 | sl11573 | G0:0003674 | <1e-4 | sl10857 | G0:0044425 | <1e-4 | slr0907 | G0:0042626 | 0.0221 |
| slr1815 | G0:0043549 | <1e-4 | slr0589 | G0:0006220 | <1e-4 | slr0059 | G0:0016462 | <1e-4 | slr0919 | G0:0043226 | <1e-4 | sl11691 | G0:0042626 | 0.0221 |
| sl10473 | G0:0006631 | <1e-4 | sl17070 | G0:0080090 | <1e-4 | slr1179 | G0:0016741 | <1e-4 | slr1911 | G0:0005575 | <1e-4 | sl15026 | G0:0042626 | 0.0221 |
| slr0325 | G0:0046483 | <1e-4 | sl11532 | G0:0055082 | <1e-4 | sl10751 | G0:0043492 | <1e-4 | ssl7045 | G0:0044464 | <1e-4 | slr1468 | G0:0042626 | 0.0221 |
| slr1913 | G0:0009123 | <1e-4 | ssr3402 | G0:0046483 | <1e-4 | slr0740 | G0:0015293 | <1e-4 | sl10281 | G0:0005575 | <1e-4 | slr1768 | G0:0042626 | 0.0221 |
| sl10496 | G0:0009987 | <1e-4 | slr0709 | G0:0051716 | <1e-4 | sl10183 | G0:0022892 | <1e-4 | sl10428 | G0:0044424 | <1e-4 | slr7013 | G0:0042626 | 0.0221 |
| ssr6089 | G0:0009259 | <1e-4 | sl10788 | G0:0006066 | <1e-4 | slr2027 | G0:0060089 | <1e-4 | slr0699 | G0:0044422 | <1e-4 | sl10762 | G0:0042626 | 0.0221 |
| slr1778 | G0:0071842 | <1e-4 | slr0551 | G0:0006220 | <1e-4 | slr1056 | G0:0016741 | <1e-4 | sl11916 | G0:0044464 | <1e-4 | slr2105 | G0:0042626 | 0.0221 |
| ssr2554 | G0:0048878 | <1e-4 | sl11388 | G0:0072524 | <1e-4 | sl10488 | G0:0005216 | <1e-4 | slr0491 | G0:0044425 | <1e-4 | slr0380 | G0:0042626 | 0.0221 |
| sl10608 | G0:0019219 | <1e-4 | slr1066 | G0:0072522 | <1e-4 | sl10069 | G0:0015267 | <1e-4 | sl11563 | G0:0044425 | <1e-4 | slr7016 | G0:0042626 | 0.0221 |
| slr1668 | G0:0006082 | <1e-4 | ssr7036 | G0:0065007 | <1e-4 | sl11049 | G0:0003674 | <1e-4 | slr1613 | G0:0005575 | <1e-4 | ssl1004 | G0:0042626 | 0.0221 |
| slr0689 | G0:0008150 | <1e-4 | slr1923 | G0:0044003 | <1e-4 | ssl8039 | G0:0005342 | <1e-4 | slr0294 | G0:0044464 | <1e-4 | sl10846 | G0:0042626 | 0.0221 |
| slr5112 | G0:0008150 | <1e-4 | slr0751 | G0:0009394 | <1e-4 | sl10597 | G0:0015291 | <1e-4 | slr5102 | G0:0044446 | <1e-4 | sl15033 | G0:0042626 | 0.0221 |
| sl10007 | G0:0010468 | <1e-4 | slr6073 | G0:0060255 | <1e-4 | sl10268 | G0:0022803 | <1e-4 | slr1110 | G0:0044464 | <1e-4 | slr0038 | G0:0042626 | 0.0221 |
| slr0755 | G0:0019751 | <1e-4 | slr0318 | G0:0019751 | <1e-4 | slr0613 | G0:0015075 | <1e-4 | sl11389 | G0:0005575 | <1e-4 | sl11062 | G0:0042626 | 0.0221 |
| ssr6079 | G0:0018130 | <1e-4 | sl11433 | G0:0046164 | <1e-4 | ssl0242 | G0:0016462 | <1e-4 | ssr6046 | G0:0044446 | <1e-4 | sl10478 | G0:0042626 | 0.0221 |
| sl10175 | G0:0009263 | <1e-4 | sl11912 | G0:0006576 | <1e-4 | slr5101 | G0:0022857 | <1e-4 | slr1266 | G0:0044425 | <1e-4 | slr0695 | G0:0042626 | 0.0221 |
| slr1468 | G0:0051171 | <1e-4 | sl11036 | G0:0052188 | <1e-4 | ssl0483 | G0:0022890 | <1e-4 | sl10793 | G0:0044446 | <1e-4 | sl11163 | G0:0042626 | 0.0221 |
| sl11192 | G0:0042282 | <1e-4 | sl11769 | G0:0051347 | <1e-4 | sl11940 | G0:0022836 | <1e-4 | slr1142 | G0:0044422 | <1e-4 | ssl8003 | G0:0042626 | 0.0221 |
| slr0092 | G0:0072527 | <1e-4 | slr1753 | G0:0090304 | <1e-4 | sl17028 | G0:0022891 | <1e-4 | slr1184 | G0:0043226 | <1e-4 | ssl1792 | G0:0042626 | 0.0221 |
| ssl0461 | G0:0045184 | <1e-4 | slr5018 | G0:0048518 | <1e-4 | sl11531 | G0:0016746 | <1e-4 | sl11911 | G0:0044464 | <1e-4 | slr7092 | G0:0042626 | 0.0221 |
| sl11934 | G0:0051188 | <1e-4 | sl11232 | G0:0046907 | <1e-4 | ssr7093 | G0:0015399 | <1e-4 | ssr2912 | G0:0005575 | <1e-4 | ssr7072 | G0:0042626 | 0.0221 |
| ssr6085 | G0:0042451 | <1e-4 | sl10446 | G0:0006721 | <1e-4 | slr2018 | G0:0060089 | <1e-4 | sl10614 | G0:0044464 | <1e-4 | sl10419 | G0:0042626 | 0.0221 |
| sl10590 | G0:0048519 | <1e-4 | slr0491 | G0:0009987 | <1e-4 | sl10283 | G0:0015291 | <1e-4 | sl18035 | G0:0043226 | <1e-4 | slr7014 | G0:0042626 | 0.0221 |
| ssl0750 | G0:0009117 | <1e-4 | sl10350 | G0:0043933 | <1e-4 | ssl3379 | G0:0015405 | <1e-4 | sl11415 | G0:0044444 | <1e-4 | slr1407 | G0:0042626 | 0.0221 |
| slr0554 | G0:0043549 | <1e-4 | sl17077 | G0:0043412 | <1e-4 | sl10737 | G0:0016746 | <1e-4 | ssr1499 | G0:0044424 | <1e-4 | sl11651 | G0:0042626 | 0.0221 |
| sl10447 | G0:0034654 | <1e-4 | slr2003 | G0:0072521 | <1e-4 | sl11773 | G0:0022890 | <1e-4 | slr7010 | G0:0044424 | <1e-4 | slr0145 | G0:0042626 | 0.0221 |
| sl10763 | G0:0048878 | <1e-4 | sl11247 | G0:0050896 | <1e-4 | sl11738 | G0:0022832 | <1e-4 | ssr0759 | G0:0044422 | <1e-4 | ssr0332 | G0:0042626 | 0.0221 |
| slr1464 | G0:0019222 | <1e-4 | sl11752 | G0:0009124 | <1e-4 | slr1917 | G0:0043492 | <1e-4 | slr1397 | G0:0044422 | <1e-4 | sl11130 | G0:0042626 | 0.0221 |
| sl10518 | G0:0043170 | <1e-4 | slr6028 | G0:0071842 | <1e-4 | sl10785 | G0:0005342 | <1e-4 | ssr1558 | G0:0044425 | <1e-4 | ssl2009 | G0:0042626 | 0.0221 |
| slr1533 | G0:0072522 | <1e-4 | ssl3142 | G0:0043933 | <1e-4 | slr1932 | G0:0016741 | <1e-4 | slr1362 | G0:0043226 | <1e-4 | slr0619 | G0:0042626 | 0.0221 |
| sl10815 | G0:0071842 | <1e-4 | slr1468 | G0:0009893 | <1e-4 | slr1885 | G0:0043167 | <1e-4 | sl10862 | G0:0044446 | <1e-4 | slr6013 | G0:0042626 | 0.0221 |
| slr1628 | G0:0072527 | <1e-4 | slr1670 | G0:0009142 | <1e-4 | slr1507 | G0:0022803 | <1e-4 | slr1127 | G0:0005575 | <1e-4 | slr1365 | G0:0042626 | 0.0221 |
| slr0269 | G0:0048878 | <1e-4 | slr1062 | G0:0048523 | <1e-4 | slr0241 | G0:0015405 | <1e-4 | sl10740 | G0:0044425 | <1e-4 | slr1914 | G0:0042626 | 0.0221 |
| slr6005 | G0:0009991 | <1e-4 | slr1195 | G0:0044255 | <1e-4 | slr1270 | G0:0022892 | <1e-4 | ssl0467 | G0:0044444 | <1e-4 | slr1206 | G0:0016820 | 0.022  |
| slr8022 | G0:0010556 | <1e-4 | sl10872 | G0:0046394 | <1e-4 | slr1259 | G0:0016462 | <1e-4 | sl11681 | G0:0044446 | <1e-4 | ssr6086 | G0:0016820 | 0.022  |
| slr0609 | G0:0009987 | <1e-4 | sl10749 | G0:0051179 | <1e-4 | sl11319 | G0:0015077 | <1e-4 | sl10980 | G0:0044444 | <1e-4 | sl17067 | G0:0016820 | 0.022  |
| sl10410 | G0:0046128 | <1e-4 | ssl0350 | G0:0009124 | <1e-4 | sl10590 | G0:0016746 | <1e-4 | ssr5092 | G0:0044424 | <1e-4 | sl11891 | G0:0016820 | 0.022  |
| slr1419 | G0:0008150 | <1e-4 | sl11469 | G0:0009199 | <1e-4 | sl10283 | G0:0022890 | <1e-4 | sl10832 | G0:0043226 | <1e-4 | sl18035 | G0:0016820 | 0.022  |
| slr1203 | G0:0006733 | <1e-4 | sl10406 | G0:0009987 | <1e-4 | slr2103 | G0:0015293 | <1e-4 | sl10614 | G0:0044424 | <1e-4 | sl17031 | G0:0016820 | 0.022  |
| slr0619 | G0:0044255 | <1e-4 | sl15109 | G0:0043549 | <1e-4 | slr0609 | G0:0005342 | <1e-4 | slr1385 | G0:0044424 | <1e-4 | ssr0336 | G0:0016820 | 0.022  |
| ssr1041 | G0:0019751 | <1e-4 | slr0787 | G0:0044283 | <1e-4 | slr0569 | G0:0015293 | <1e-4 | slr1674 | G0:0005575 | <1e-4 | slr0453 | G0:0016820 | 0.022  |
| ssr7035 | G0:0034654 | <1e-4 | sl10162 | G0:0048522 | <1e-4 | sl11132 | G0:0016746 | <1e-4 | slr1537 | G0:0043226 | <1e-4 | ssr6083 | G0:0016820 | 0.022  |
| slr0416 | G0:0050801 | <1e-4 | sl10765 | G0:0006766 | <1e-4 | sl11411 | G0:0016817 | <1e-4 | sl11526 | G0:0005575 | <1e-4 | ssr1114 | G0:0016874 | 0.022  |
| slr1624 | G0:0048519 | <1e-4 | slr0872 | G0:0009892 | <1e-4 | sl10309 | G0:0043167 | <1e-4 | ssl2920 | G0:0044464 | <1e-4 | slr0172 | G0:0016874 | 0.022  |
| slr2092 | G0:0005996 | <1e-4 | slr0337 | G0:0018130 | <1e-4 | sl10606 | G0:0015405 | <1e-4 | sl11717 | G0:0044422 | <1e-4 | sl10225 | G0:0016874 | 0.022  |
| sl10473 | G0:0072521 | <1e-4 | slr2052 | G0:0050794 | <1e-4 | slr1935 | G0:0022891 | <1e-4 | slr1069 | G0:0005575 | <1e-4 | ssr1041 | G0:0016820 | 0.022  |
| slr2110 | G0:0006163 | <1e-4 | slr6022 | G0:0008610 | <1e-4 | sl11306 | G0:0008171 | <1e-4 | sl10102 | G0:0044446 | <1e-4 | slr0325 | G0:0016820 | 0.022  |
| slr6039 | G0:0051188 | <1e-4 | slr1419 | G0:0050896 | <1e-4 | ssr1766 | G0:0060089 | <1e-4 | slr7094 | G0:0044424 | <1e-4 | slr2115 | G0:0016874 | 0.022  |
| slr1815 | G0:0072528 | <1e-4 | sl10400 | G0:0006732 | <1e-4 | slr0249 | G0:0022890 | <1e-4 | slr0509 | G0:0043226 | <1e-4 | slr0273 | G0:0016820 | 0.022  |
| sl10282 | G0:0072521 | <1e-4 | slr1513 | G0:0044255 | <1e-4 | sl10577 | G0:0015399 | <1e-4 | slr1780 | G0:0044424 | <1e-4 | sl11717 | G0:0016820 | 0.022  |

|         |            |       |         |            |       |         |            |       |         |            |       |         |            |       |
|---------|------------|-------|---------|------------|-------|---------|------------|-------|---------|------------|-------|---------|------------|-------|
| slr6031 | G0:0043648 | <1e-4 | sl10994 | G0:0006766 | <1e-4 | ssr5117 | G0:0015291 | <1e-4 | slr0635 | G0:0044422 | <1e-4 | slr1070 | G0:0016874 | 0.022 |
| slr1462 | G0:0051179 | <1e-4 | sl10400 | G0:0065007 | <1e-4 | sl11863 | G0:0016462 | <1e-4 | slr0287 | G0:0005575 | <1e-4 | sl11573 | G0:0016820 | 0.022 |
| sl10405 | G0:0009057 | <1e-4 | slr0606 | G0:0044003 | <1e-4 | slr1152 | G0:0015405 | <1e-4 | slr2046 | G0:0044444 | <1e-4 | sl11068 | G0:0016820 | 0.022 |
| ssr2843 | G0:0051179 | <1e-4 | ssr1375 | G0:0051188 | <1e-4 | slr0596 | G0:0022890 | <1e-4 | sl11272 | G0:0044444 | <1e-4 | slr0318 | G0:0016874 | 0.022 |
| sl10839 | G0:0060255 | <1e-4 | slr1353 | G0:0008150 | <1e-4 | ss11378 | G0:0015075 | <1e-4 | sl11036 | G0:0043226 | <1e-4 | sl10585 | G0:0016874 | 0.022 |
| slr1726 | G0:0019222 | <1e-4 | slr0989 | G0:0043436 | <1e-4 | slr1537 | G0:0016817 | <1e-4 | ssr1391 | G0:0044446 | <1e-4 | sl15003 | G0:0016820 | 0.022 |
| slr1450 | G0:0019362 | <1e-4 | sl11396 | G0:0051186 | <1e-4 | slr1866 | G0:0016817 | <1e-4 | slr0680 | G0:0044464 | <1e-4 | ss13573 | G0:0016820 | 0.022 |
| sl10456 | G0:0034660 | <1e-4 | slr0551 | G0:0052188 | <1e-4 | slr0689 | G0:0016817 | <1e-4 | ss11300 | G0:0043226 | <1e-4 | sl17069 | G0:0016820 | 0.022 |
| slr0305 | G0:0016054 | <1e-4 | slr2110 | G0:0019222 | <1e-4 | ss10352 | G0:0015293 | <1e-4 | slr1095 | G0:0044444 | <1e-4 | slr6075 | G0:0016820 | 0.022 |
| slr1768 | G0:0044282 | <1e-4 | ss12781 | G0:0010556 | <1e-4 | slr1566 | G0:0043167 | <1e-4 | slr0948 | G0:0044464 | <1e-4 | slr0373 | G0:0016874 | 0.022 |
| slr1470 | G0:0048518 | <1e-4 | slr1032 | G0:0009259 | <1e-4 | sl11352 | G0:0043492 | <1e-4 | sl11749 | G0:0044422 | <1e-4 | ss12595 | G0:0016820 | 0.022 |
| sl10658 | G0:0044248 | <1e-4 | sl10208 | G0:0051347 | <1e-4 | ssr7079 | G0:0022890 | <1e-4 | slr1110 | G0:0005575 | <1e-4 | slr1236 | G0:0016820 | 0.022 |
| ss13291 | G0:0051179 | <1e-4 | slr2010 | G0:0046128 | <1e-4 | slr1885 | G0:0022832 | <1e-4 | ssr7036 | G0:0005575 | <1e-4 | sl11730 | G0:0016874 | 0.022 |
| slr1425 | G0:0042180 | <1e-4 | ssr1765 | G0:0005996 | <1e-4 | slr0416 | G0:0022838 | <1e-4 | slr1101 | G0:0044424 | <1e-4 | sl10297 | G0:0016874 | 0.022 |
| slr1619 | G0:0006732 | <1e-4 | slr7095 | G0:0006721 | <1e-4 | slr1918 | G0:0022832 | <1e-4 | sl11730 | G0:0005575 | <1e-4 | ssr1425 | G0:0016820 | 0.022 |
| sl11726 | G0:0043549 | <1e-4 | sl11381 | G0:0008150 | <1e-4 | slr0888 | G0:0043492 | <1e-4 | slr6044 | G0:0044424 | <1e-4 | slr1658 | G0:0016874 | 0.022 |
| sl10147 | G0:0051186 | <1e-4 | slr0601 | G0:0009117 | <1e-4 | sl10397 | G0:0043492 | <1e-4 | sl11024 | G0:0044425 | <1e-4 | ss15100 | G0:0016820 | 0.022 |
| slr0172 | G0:0051246 | <1e-4 | sl10436 | G0:0006733 | <1e-4 | slr1493 | G0:0022890 | <1e-4 | sl10413 | G0:0044444 | <1e-4 | slr1450 | G0:0016820 | 0.022 |
| slr7082 | G0:0052188 | <1e-4 | sl17086 | G0:0009889 | <1e-4 | ss12595 | G0:0022836 | <1e-4 | sl12006 | G0:0043226 | <1e-4 | ssr6030 | G0:0016820 | 0.022 |
| sl18032 | G0:0051188 | <1e-4 | slr0771 | G0:0080090 | <1e-4 | slr1110 | G0:0015291 | <1e-4 | slr6066 | G0:0044422 | <1e-4 | sl10678 | G0:0016820 | 0.022 |
| sl17067 | G0:0072527 | <1e-4 | slr1811 | G0:0009263 | <1e-4 | slr1864 | G0:0016741 | <1e-4 | ssr5019 | G0:0044444 | <1e-4 | slr6068 | G0:0016820 | 0.022 |
| slr1240 | G0:0006631 | <1e-4 | ss18039 | G0:0009132 | <1e-4 | sl10253 | G0:0022892 | <1e-4 | sl10588 | G0:0044422 | <1e-4 | ss12138 | G0:0016820 | 0.022 |
| slr2003 | G0:0031326 | <1e-4 | slr1187 | G0:0051188 | <1e-4 | sl10424 | G0:0043492 | <1e-4 | slr1699 | G0:0005575 | <1e-4 | ssr6019 | G0:0016820 | 0.022 |
| slr5118 | G0:0046164 | <1e-4 | ss13142 | G0:0016053 | <1e-4 | slr1999 | G0:0015075 | <1e-4 | sl11715 | G0:0005575 | <1e-4 | slr1789 | G0:0016820 | 0.022 |
| slr0380 | G0:0009150 | <1e-4 | slr1573 | G0:0090304 | <1e-4 | sl11355 | G0:0022803 | <1e-4 | sl15034 | G0:0044444 | <1e-4 | sl10691 | G0:0016820 | 0.022 |
| sl10875 | G0:0072528 | <1e-4 | sl10286 | G0:0009165 | <1e-4 | sl11950 | G0:0008171 | <1e-4 | ssr3570 | G0:0044425 | <1e-4 | ssr7079 | G0:0016820 | 0.022 |
| sl10875 | G0:0072521 | <1e-4 | slr1576 | G0:0006066 | <1e-4 | sl10354 | G0:0016818 | <1e-4 | sl17070 | G0:0005575 | <1e-4 | slr5053 | G0:0016820 | 0.022 |
| ss10788 | G0:0043549 | <1e-4 | sl10994 | G0:0005996 | <1e-4 | slr0317 | G0:0042623 | <1e-4 | slr1230 | G0:0044444 | <1e-4 | slr0605 | G0:0016874 | 0.022 |
| slr0505 | G0:0046907 | <1e-4 | sl10751 | G0:0043648 | <1e-4 | slr1173 | G0:0022836 | <1e-4 | slr0142 | G0:0043226 | <1e-4 | sl11505 | G0:0016874 | 0.022 |
| sl11390 | G0:0071554 | <1e-4 | sl16053 | G0:0044248 | <1e-4 | ssr5120 | G0:0015075 | <1e-4 | sl11570 | G0:0044424 | <1e-4 | slr0664 | G0:0016874 | 0.022 |
| sl11265 | G0:0051246 | <1e-4 | slr1601 | G0:0010468 | <1e-4 | slr8014 | G0:0022832 | <1e-4 | sl11830 | G0:0043226 | <1e-4 | sl17089 | G0:0016820 | 0.022 |
| slr1923 | G0:0006753 | <1e-4 | slr0262 | G0:0006793 | <1e-4 | sl10933 | G0:0022803 | <1e-4 | slr1161 | G0:0044464 | <1e-4 | slr1944 | G0:0016820 | 0.022 |
| sl10982 | G0:0051171 | <1e-4 | sl10473 | G0:0034641 | <1e-4 | ss12814 | G0:0016746 | <1e-4 | slr1657 | G0:0044424 | <1e-4 | slr1259 | G0:0016874 | 0.022 |
| slr0489 | G0:0019362 | <1e-4 | sl11340 | G0:0046483 | <1e-4 | slr0981 | G0:0016818 | <1e-4 | sl10931 | G0:0043226 | <1e-4 | slr0801 | G0:0016874 | 0.022 |
| sl10710 | G0:0044106 | <1e-4 | slr6072 | G0:0001932 | <1e-4 | sl10553 | G0:0015399 | <1e-4 | slr7016 | G0:0005575 | <1e-4 | slr1087 | G0:0016820 | 0.022 |
| slr1288 | G0:0006733 | <1e-4 | slr6065 | G0:0050789 | <1e-4 | sl11380 | G0:0043492 | <1e-4 | slr0980 | G0:0044422 | <1e-4 | ss10788 | G0:0016820 | 0.022 |
| slr0742 | G0:0034641 | <1e-4 | ssr2551 | G0:0006066 | <1e-4 | slr1611 | G0:0022838 | <1e-4 | sl10926 | G0:0044425 | <1e-4 | ss15008 | G0:0016820 | 0.022 |
| slr2092 | G0:0031326 | <1e-4 | slr0780 | G0:0031323 | <1e-4 | sl11123 | G0:0015075 | <1e-4 | slr0815 | G0:0005575 | <1e-4 | slr1911 | G0:0016820 | 0.022 |
| slr0313 | G0:0072528 | <1e-4 | sl10319 | G0:0009309 | <1e-4 | slr0921 | G0:0022857 | <1e-4 | ss11300 | G0:0005575 | <1e-4 | ssr1558 | G0:0016820 | 0.022 |
| slr0581 | G0:0009123 | <1e-4 | sl10563 | G0:0051188 | <1e-4 | sl10456 | G0:0022832 | <1e-4 | slr0060 | G0:0044424 | <1e-4 | sl11106 | G0:0016820 | 0.022 |
| sl11352 | G0:0043170 | <1e-4 | slr1484 | G0:0048523 | <1e-4 | sl10584 | G0:0022890 | <1e-4 | ssr7017 | G0:0044444 | <1e-4 | sl11873 | G0:0016874 | 0.022 |
| sl10335 | G0:0006576 | <1e-4 | slr1178 | G0:0031326 | <1e-4 | sl11344 | G0:0016746 | <1e-4 | slr2117 | G0:0044446 | <1e-4 | slr1062 | G0:0016874 | 0.022 |
| sl15097 | G0:0009059 | <1e-4 | slr1468 | G0:0031326 | <1e-4 | slr1116 | G0:0015293 | <1e-4 | slr5023 | G0:0005575 | <1e-4 | slr1980 | G0:0016820 | 0.022 |
| sl10359 | G0:0016052 | <1e-4 | ssr6078 | G0:0009259 | <1e-4 | slr1566 | G0:0022857 | <1e-4 | slr1183 | G0:0044446 | <1e-4 | sl10525 | G0:0016820 | 0.022 |
| slr0207 | G0:0051716 | <1e-4 | slr1863 | G0:0071840 | <1e-4 | slr0645 | G0:0022857 | <1e-4 | sl10286 | G0:0044422 | <1e-4 | slr0702 | G0:0016874 | 0.022 |
| sl10518 | G0:0042451 | <1e-4 | ssr2912 | G0:0006733 | <1e-4 | slr1507 | G0:0015267 | <1e-4 | sl10584 | G0:0044444 | <1e-4 | slr0238 | G0:0016820 | 0.022 |
| sl11203 | G0:0071841 | <1e-4 | slr0655 | G0:0046483 | <1e-4 | slr7011 | G0:0043167 | <1e-4 | slr1718 | G0:0044425 | <1e-4 | sl11738 | G0:0016874 | 0.022 |
| slr7037 | G0:0009144 | <1e-4 | sl11911 | G0:0044283 | <1e-4 | slr0142 | G0:0015399 | <1e-4 | sl10174 | G0:0005575 | <1e-4 | sl11254 | G0:0016820 | 0.022 |
| sl10282 | G0:0055114 | <1e-4 | ssr5106 | G0:0009262 | <1e-4 | sl11089 | G0:0022836 | <1e-4 | sl11906 | G0:0044422 | <1e-4 | ss12162 | G0:0016820 | 0.022 |
| ssr2554 | G0:0009165 | <1e-4 | sl11166 | G0:0043933 | <1e-4 | sl11862 | G0:0022857 | <1e-4 | slr1557 | G0:0044425 | <1e-4 | slr0291 | G0:0016820 | 0.022 |
| slr0729 | G0:0006753 | <1e-4 | slr1590 | G0:0043648 | <1e-4 | sl10775 | G0:0022838 | <1e-4 | sl10702 | G0:0044464 | <1e-4 | sl10031 | G0:0016820 | 0.022 |
| ss17021 | G0:0050789 | <1e-4 | slr0821 | G0:0009142 | <1e-4 | slr1990 | G0:0022890 | <1e-4 | slr1866 | G0:0044425 | <1e-4 | slr0637 | G0:0016820 | 0.022 |
| sl11949 | G0:0009150 | <1e-4 | ssr1041 | G0:0009259 | <1e-4 | sl10780 | G0:0022857 | <1e-4 | ssr2781 | G0:0044422 | <1e-4 | slr0975 | G0:0016874 | 0.022 |
| slr0325 | G0:0060255 | <1e-4 | sl10230 | G0:0051246 | <1e-4 | sl11222 | G0:0015077 | <1e-4 | slr1215 | G0:0005575 | <1e-4 | slr1544 | G0:0016874 | 0.022 |

|         |            |       |         |            |       |         |            |       |         |            |       |         |            |       |
|---------|------------|-------|---------|------------|-------|---------|------------|-------|---------|------------|-------|---------|------------|-------|
| ss15096 | G0:0006082 | <1e-4 | slr0013 | G0:0044281 | <1e-4 | slr1142 | G0:0043167 | <1e-4 | sl10160 | G0:0044464 | <1e-4 | sl11267 | G0:0016874 | 0.022 |
| sl11949 | G0:0009893 | <1e-4 | sl10198 | G0:0042455 | <1e-4 | sl11106 | G0:0060089 | <1e-4 | sl11411 | G0:0043226 | <1e-4 | slr0967 | G0:0016820 | 0.022 |
| slr1177 | G0:0055082 | <1e-4 | sl10910 | G0:0042451 | <1e-4 | slr1406 | G0:0005342 | <1e-4 | sl11757 | G0:0044422 | <1e-4 | sl11609 | G0:0016820 | 0.022 |
| sl10298 | G0:0034641 | <1e-4 | slr1288 | G0:0051347 | <1e-4 | sl10309 | G0:0015293 | <1e-4 | slr0569 | G0:0043226 | <1e-4 | sl10281 | G0:0016874 | 0.022 |
| sl15097 | G0:0034654 | <1e-4 | slr6016 | G0:0060255 | <1e-4 | sl11024 | G0:0016818 | <1e-4 | slr0304 | G0:0005575 | <1e-4 | slr0863 | G0:0016820 | 0.022 |
| ssr2142 | G0:0034654 | <1e-4 | sl10189 | G0:0051818 | <1e-4 | ss17039 | G0:0015293 | <1e-4 | sl11692 | G0:0044446 | <1e-4 | slr6022 | G0:0016820 | 0.022 |
| slr1519 | G0:0080090 | <1e-4 | sl11640 | G0:0072521 | <1e-4 | ssr0109 | G0:0043492 | <1e-4 | sl10525 | G0:0044444 | <1e-4 | sl11040 | G0:0016874 | 0.022 |
| slr1162 | G0:0009892 | <1e-4 | sl10939 | G0:0072528 | <1e-4 | slr6014 | G0:0015075 | <1e-4 | ssr2317 | G0:0044425 | <1e-4 | ss17039 | G0:0016820 | 0.022 |
| slr1315 | G0:0006163 | <1e-4 | sl11061 | G0:0044260 | <1e-4 | sl10911 | G0:0015077 | <1e-4 | slr0111 | G0:0044425 | <1e-4 | slr2000 | G0:0016820 | 0.022 |
| sl10488 | G0:0048518 | <1e-4 | slr1762 | G0:0044260 | <1e-4 | slr0941 | G0:0016818 | <1e-4 | slr2038 | G0:0044464 | <1e-4 | sm10011 | G0:0016874 | 0.022 |
| ss11792 | G0:0009161 | <1e-4 | sl10181 | G0:0009126 | <1e-4 | slr0270 | G0:0008171 | <1e-4 | slr6094 | G0:0044422 | <1e-4 | ssr0759 | G0:0016820 | 0.022 |
| sl11504 | G0:0072528 | <1e-4 | slr1462 | G0:0006811 | <1e-4 | ssr2962 | G0:0042623 | <1e-4 | ssr2554 | G0:0005575 | <1e-4 | slr1413 | G0:0016874 | 0.022 |
| sl18033 | G0:0006733 | <1e-4 | slr1659 | G0:0009262 | <1e-4 | slr1752 | G0:0043492 | <1e-4 | slr1472 | G0:0044424 | <1e-4 | ssr3572 | G0:0016820 | 0.022 |
| sl11119 | G0:0008610 | <1e-4 | ss13615 | G0:0055086 | <1e-4 | ss15025 | G0:0016746 | <1e-4 | ss15015 | G0:0044444 | <1e-4 | sl11882 | G0:0016820 | 0.022 |
| sl11866 | G0:0043170 | <1e-4 | slr1819 | G0:0006082 | <1e-4 | sl10982 | G0:0016746 | <1e-4 | sl11654 | G0:0044424 | <1e-4 | sl11681 | G0:0016820 | 0.022 |
| sl11863 | G0:0019222 | <1e-4 | sl11726 | G0:0009132 | <1e-4 | slr0456 | G0:0060089 | <1e-4 | slr0313 | G0:0043226 | <1e-4 | slr1415 | G0:0016874 | 0.022 |
| ssr2912 | G0:0009165 | <1e-4 | sl11835 | G0:0072521 | <1e-4 | slr0695 | G0:0016818 | <1e-4 | ssr2754 | G0:0044444 | <1e-4 | ss10467 | G0:0016820 | 0.022 |
| sl10505 | G0:0006732 | <1e-4 | sl10499 | G0:0009165 | <1e-4 | slr1958 | G0:0043492 | <1e-4 | slr0610 | G0:0005575 | <1e-4 | slr0104 | G0:0016874 | 0.022 |
| sl11455 | G0:0009126 | <1e-4 | sl11527 | G0:0072522 | <1e-4 | slr1544 | G0:0016817 | <1e-4 | ss15129 | G0:0044464 | <1e-4 | sl10847 | G0:0016820 | 0.022 |
| slr1813 | G0:0044260 | <1e-4 | ssr2787 | G0:0009161 | <1e-4 | ss11520 | G0:0042623 | <1e-4 | sl11511 | G0:0044425 | <1e-4 | ssr0761 | G0:0016820 | 0.022 |
| slr1699 | G0:0008150 | <1e-4 | slr1258 | G0:0009056 | <1e-4 | sl18012 | G0:0015077 | <1e-4 | slr0148 | G0:0044446 | <1e-4 | ssr2711 | G0:0016820 | 0.022 |
| sl11583 | G0:0008150 | <1e-4 | slr1648 | G0:0031323 | <1e-4 | ssr3341 | G0:0015075 | <1e-4 | slr1800 | G0:0005575 | <1e-4 | slr5087 | G0:0016820 | 0.022 |
| slr0272 | G0:0009142 | <1e-4 | sl11373 | G0:0009059 | <1e-4 | sl11348 | G0:0005342 | <1e-4 | sl10400 | G0:0005575 | <1e-4 | ssr3402 | G0:0016820 | 0.022 |
| slr0668 | G0:0005996 | <1e-4 | ss12162 | G0:0006720 | <1e-4 | ssr0336 | G0:0022803 | <1e-4 | slr6075 | G0:0043226 | <1e-4 | sl10479 | G0:0016820 | 0.022 |
| slr1676 | G0:0065007 | <1e-4 | slr2032 | G0:0048878 | <1e-4 | ssr5121 | G0:0022891 | <1e-4 | slr0784 | G0:0044425 | <1e-4 | sl10539 | G0:0016874 | 0.022 |
| ssr6026 | G0:0044275 | <1e-4 | sl11675 | G0:0016054 | <1e-4 | sl11442 | G0:0015405 | <1e-4 | sl11461 | G0:0005575 | <1e-4 | sl11390 | G0:0016874 | 0.022 |
| slr8044 | G0:0009308 | <1e-4 | slr1576 | G0:0090304 | <1e-4 | slr1990 | G0:0015399 | <1e-4 | sl11504 | G0:0043226 | <1e-4 | sl11054 | G0:0016874 | 0.022 |
| slr2103 | G0:0072521 | <1e-4 | sl11866 | G0:0046164 | <1e-4 | sl11541 | G0:0042623 | <1e-4 | sl11352 | G0:0043226 | <1e-4 | sl10376 | G0:0016820 | 0.022 |
| slr0589 | G0:0009259 | <1e-4 | slr6007 | G0:0009259 | <1e-4 | slr1623 | G0:0043167 | <1e-4 | ss11923 | G0:0044446 | <1e-4 | slr1425 | G0:0016820 | 0.022 |
| sl18004 | G0:0034641 | <1e-4 | sl11095 | G0:0006811 | <1e-4 | ss11046 | G0:0015405 | <1e-4 | sl10888 | G0:0044446 | <1e-4 | slr1577 | G0:0016820 | 0.022 |
| slr0380 | G0:0046907 | <1e-4 | slr0728 | G0:0052188 | <1e-4 | sl10625 | G0:0022832 | <1e-4 | slr0815 | G0:0044464 | <1e-4 | sl11950 | G0:0016874 | 0.022 |
| sl17078 | G0:0051179 | <1e-4 | slr6066 | G0:0009262 | <1e-4 | sl10174 | G0:0043492 | <1e-4 | slr2103 | G0:0005575 | <1e-4 | ss13549 | G0:0016820 | 0.022 |
| sl18027 | G0:0050789 | <1e-4 | sl10198 | G0:0051171 | <1e-4 | sl11173 | G0:0060089 | <1e-4 | sl11250 | G0:0005575 | <1e-4 | slr0712 | G0:0016820 | 0.022 |
| sl10162 | G0:0009117 | <1e-4 | slr2119 | G0:0019752 | <1e-4 | slr1235 | G0:0015267 | <1e-4 | sl10926 | G0:0044464 | <1e-4 | slr6088 | G0:0016820 | 0.022 |
| slr0145 | G0:0009263 | <1e-4 | sl10022 | G0:0006811 | <1e-4 | sl10148 | G0:0022857 | <1e-4 | ss17046 | G0:0044464 | <1e-4 | slr1513 | G0:0016820 | 0.022 |
| sl10847 | G0:0008150 | <1e-4 | slr6013 | G0:0043436 | <1e-4 | sl11021 | G0:0022836 | <1e-4 | ss10738 | G0:0005575 | <1e-4 | ss12069 | G0:0016820 | 0.022 |
| slr1762 | G0:0046394 | <1e-4 | slr1210 | G0:0008150 | <1e-4 | sl10102 | G0:0005342 | <1e-4 | slr0914 | G0:0044422 | <1e-4 | slr0634 | G0:0016820 | 0.022 |
| sl10274 | G0:0009057 | <1e-4 | slr0642 | G0:0006720 | <1e-4 | ssr2317 | G0:0022803 | <1e-4 | ssr2067 | G0:0005575 | <1e-4 | slr1290 | G0:0016820 | 0.022 |
| sl11071 | G0:0044248 | <1e-4 | slr0455 | G0:0009893 | <1e-4 | sl10985 | G0:0016817 | <1e-4 | slr0318 | G0:0005575 | <1e-4 | slr0771 | G0:0016820 | 0.022 |
| slr0380 | G0:0034654 | <1e-4 | ss10750 | G0:0034654 | <1e-4 | sl11192 | G0:0022891 | <1e-4 | sl11250 | G0:0044422 | <1e-4 | slr0181 | G0:0016820 | 0.022 |
| ssr1114 | G0:0009165 | <1e-4 | slr1944 | G0:0006720 | <1e-4 | sl11783 | G0:0005342 | <1e-4 | sl11586 | G0:0044422 | <1e-4 | slr1590 | G0:0016874 | 0.022 |
| sl11921 | G0:0045184 | <1e-4 | sl11769 | G0:0071840 | <1e-4 | slr1951 | G0:0022890 | <1e-4 | sl10424 | G0:0044444 | <1e-4 | ssr2975 | G0:0016820 | 0.022 |
| sl10167 | G0:0055082 | <1e-4 | ssr2333 | G0:0006631 | <1e-4 | sl10539 | G0:0015293 | <1e-4 | slr0645 | G0:0005575 | <1e-4 | slr5127 | G0:0016820 | 0.022 |
| ss12471 | G0:0009144 | <1e-4 | sl10174 | G0:0006082 | <1e-4 | slr0392 | G0:0005342 | <1e-4 | sl11926 | G0:0005575 | <1e-4 | sl15132 | G0:0016820 | 0.022 |
| sl11830 | G0:0006066 | <1e-4 | sl10584 | G0:0042455 | <1e-4 | slr1618 | G0:0015267 | <1e-4 | slr0948 | G0:0005575 | <1e-4 | slr1101 | G0:0016820 | 0.022 |
| slr1927 | G0:0009394 | <1e-4 | sl15062 | G0:0046128 | <1e-4 | sl10298 | G0:0015075 | <1e-4 | slr1462 | G0:0044422 | <1e-4 | slr7024 | G0:0016874 | 0.022 |
| slr0453 | G0:0055082 | <1e-4 | sl10545 | G0:0045184 | <1e-4 | sl10595 | G0:0016818 | <1e-4 | slr0509 | G0:0044446 | <1e-4 | slr0780 | G0:0016820 | 0.022 |
| sl11866 | G0:0009262 | <1e-4 | ssr0536 | G0:0034641 | <1e-4 | sl11414 | G0:0043167 | <1e-4 | slr0416 | G0:0044444 | <1e-4 | slr0459 | G0:0016820 | 0.022 |
| sl11401 | G0:0001932 | <1e-4 | slr1413 | G0:0043170 | <1e-4 | slr1215 | G0:0005342 | <1e-4 | sl15063 | G0:0044446 | <1e-4 | slr6081 | G0:0016820 | 0.022 |
| sl10997 | G0:0048523 | <1e-4 | slr7099 | G0:0006091 | <1e-4 | slr1069 | G0:0015075 | <1e-4 | ssr1768 | G0:0044425 | <1e-4 | ssr7035 | G0:0016820 | 0.022 |
| slr0503 | G0:0071554 | <1e-4 | ss15096 | G0:0065007 | <1e-4 | slr0730 | G0:0022832 | <1e-4 | ss15068 | G0:0044446 | <1e-4 | sl10749 | G0:0016820 | 0.022 |
| slr0065 | G0:0006721 | <1e-4 | sl10284 | G0:0009262 | <1e-4 | ssr0761 | G0:0042623 | <1e-4 | ss13177 | G0:0044446 | <1e-4 | slr1474 | G0:0016820 | 0.022 |
| sl10615 | G0:0031323 | <1e-4 | slr0590 | G0:0006732 | <1e-4 | sl10238 | G0:0005342 | <1e-4 | slr5037 | G0:0044446 | <1e-4 | sl10787 | G0:0016874 | 0.022 |
| sl11254 | G0:0051246 | <1e-4 | slr1236 | G0:0060255 | <1e-4 | ss11046 | G0:0005342 | <1e-4 | sl15132 | G0:0044464 | <1e-4 | sl11052 | G0:0016820 | 0.022 |

|         |            |       |         |            |       |         |            |       |         |            |       |         |            |        |
|---------|------------|-------|---------|------------|-------|---------|------------|-------|---------|------------|-------|---------|------------|--------|
| slr0765 | G0:0022411 | <1e-4 | slr1444 | G0:0006721 | <1e-4 | slr0431 | G0:0015075 | <1e-4 | ssr2755 | G0:0044422 | <1e-4 | sl18012 | G0:0016820 | 0.022  |
| slr0514 | G0:0006733 | <1e-4 | sl11319 | G0:0006732 | <1e-4 | slr1767 | G0:0015267 | <1e-4 | slr0503 | G0:0044422 | <1e-4 | slr1624 | G0:0016820 | 0.022  |
| sl10183 | G0:0051347 | <1e-4 | sl11381 | G0:0071840 | <1e-4 | slr0453 | G0:0016817 | <1e-4 | slr0383 | G0:0044464 | <1e-4 | slr0650 | G0:0016874 | 0.022  |
| sl11640 | G0:0043549 | <1e-4 | slr1591 | G0:0044260 | <1e-4 | slr1275 | G0:0008171 | <1e-4 | ssr3122 | G0:0044425 | <1e-4 | sl11340 | G0:0016820 | 0.022  |
| sl11241 | G0:0006066 | <1e-4 | sl10565 | G0:0006163 | <1e-4 | slr1811 | G0:0016818 | <1e-4 | slr0398 | G0:0044444 | <1e-4 | sl11911 | G0:0016820 | 0.022  |
| sl11191 | G0:0006091 | <1e-4 | sl11285 | G0:0006766 | <1e-4 | sl10282 | G0:0015075 | <1e-4 | slr0459 | G0:0005575 | <1e-4 | sl11350 | G0:0016874 | 0.022  |
| slr1659 | G0:0044260 | <1e-4 | sl18001 | G0:0046394 | <1e-4 | slr1880 | G0:0022803 | <1e-4 | sl10564 | G0:0044446 | <1e-4 | sl10442 | G0:0016820 | 0.022  |
| ssr0109 | G0:0009124 | <1e-4 | sl10162 | G0:0031640 | <1e-4 | ss10312 | G0:0022892 | <1e-4 | slr5077 | G0:0043226 | <1e-4 | slr1152 | G0:0016874 | 0.022  |
| slr1721 | G0:0009150 | <1e-4 | slr0397 | G0:0008610 | <1e-4 | slr1809 | G0:0008171 | <1e-4 | sl10839 | G0:0044446 | <1e-4 | slr5112 | G0:0016820 | 0.022  |
| sl10602 | G0:0051186 | <1e-4 | slr0730 | G0:0042180 | <1e-4 | slr1472 | G0:0016462 | <1e-4 | sl10473 | G0:0005575 | <1e-4 | slr0815 | G0:0016874 | 0.022  |
| sl15132 | G0:0048878 | <1e-4 | slr2120 | G0:0009987 | <1e-4 | sl10141 | G0:0005342 | <1e-4 | sl10625 | G0:0044444 | <1e-4 | sl10298 | G0:0016820 | 0.022  |
| sl11691 | G0:0009144 | <1e-4 | sl11608 | G0:0018130 | <1e-4 | sl10615 | G0:0022891 | <1e-4 | sl11319 | G0:0044422 | <1e-4 | sl10069 | G0:0016820 | 0.022  |
| sl10298 | G0:0052111 | <1e-4 | slr0356 | G0:0019222 | <1e-4 | sl11862 | G0:0003674 | <1e-4 | sl10175 | G0:0043226 | <1e-4 | sl11652 | G0:0016820 | 0.022  |
| slr1376 | G0:0043933 | <1e-4 | slr1704 | G0:0055086 | <1e-4 | slr1174 | G0:0022836 | <1e-4 | sl11123 | G0:0005575 | <1e-4 | slr0670 | G0:0016820 | 0.022  |
| slr1864 | G0:0009262 | <1e-4 | slr1398 | G0:0043549 | <1e-4 | ssr0335 | G0:0015077 | <1e-4 | ss11520 | G0:0044425 | <1e-4 | sl10595 | G0:0016874 | 0.022  |
| slr1852 | G0:0034660 | <1e-4 | ssr1765 | G0:0009893 | <1e-4 | ss15031 | G0:0043492 | <1e-4 | slr1956 | G0:0044422 | <1e-4 | sl18040 | G0:0016820 | 0.022  |
| slr1053 | G0:0009144 | <1e-4 | slr6067 | G0:0022607 | <1e-4 | slr1114 | G0:0022838 | <1e-4 | ss17074 | G0:0005575 | <1e-4 | slr1033 | G0:0016874 | 0.022  |
| slr1721 | G0:0006091 | <1e-4 | slr0509 | G0:0051818 | <1e-4 | slr1618 | G0:0015293 | <1e-4 | slr1195 | G0:0044446 | <1e-4 | slr0914 | G0:0016820 | 0.022  |
| sl11834 | G0:0009263 | <1e-4 | slr7097 | G0:0042455 | <1e-4 | sl10010 | G0:0008171 | <1e-4 | sl15069 | G0:0044464 | <1e-4 | slr2103 | G0:0016820 | 0.022  |
| sl10446 | G0:0044283 | <1e-4 | sl11915 | G0:0009987 | <1e-4 | sl10676 | G0:0016741 | <1e-4 | slr0325 | G0:0044464 | <1e-4 | ssr5074 | G0:0016820 | 0.022  |
| sl11632 | G0:0045184 | <1e-4 | slr1425 | G0:0051716 | <1e-4 | sl11934 | G0:0022836 | <1e-4 | sl18011 | G0:0005575 | <1e-4 | ssr1473 | G0:0016820 | 0.022  |
| slr7016 | G0:0044283 | <1e-4 | slr1474 | G0:0051234 | <1e-4 | sl10742 | G0:0016746 | <1e-4 | sl12011 | G0:0005575 | <1e-4 | slr0510 | G0:0016874 | 0.022  |
| slr1472 | G0:0048518 | <1e-4 | sl10761 | G0:0006811 | <1e-4 | sl10839 | G0:0060089 | <1e-4 | sl10861 | G0:0044422 | <1e-4 | slr1915 | G0:0016820 | 0.022  |
| slr2052 | G0:0044282 | <1e-4 | sl10763 | G0:0050896 | <1e-4 | sl11477 | G0:0022832 | <1e-4 | slr0680 | G0:0044444 | <1e-4 | slr1935 | G0:0016820 | 0.022  |
| slr1098 | G0:0009123 | <1e-4 | slr1944 | G0:0072521 | <1e-4 | slr2018 | G0:0005342 | <1e-4 | slr6074 | G0:0005575 | <1e-4 | slr0728 | G0:0016820 | 0.022  |
| ssr3122 | G0:0050794 | <1e-4 | slr1074 | G0:0009259 | <1e-4 | slr5119 | G0:0016818 | <1e-4 | sl10549 | G0:0044425 | <1e-4 | ssr1528 | G0:0016874 | 0.022  |
| sl18007 | G0:0019219 | <1e-4 | slr1177 | G0:0072522 | <1e-4 | ssr6099 | G0:0060089 | <1e-4 | ssr5121 | G0:0044464 | <1e-4 | ss11918 | G0:0016820 | 0.022  |
| slr0519 | G0:0006766 | <1e-4 | slr2111 | G0:0005996 | <1e-4 | sl10860 | G0:0016818 | <1e-4 | ssr1765 | G0:0044422 | <1e-4 | sl17090 | G0:0016820 | 0.022  |
| ssr1951 | G0:0048523 | <1e-4 | slr5087 | G0:0006066 | <1e-4 | slr2010 | G0:0015077 | <1e-4 | sl10310 | G0:0043226 | <1e-4 | sl10327 | G0:0016820 | 0.022  |
| ssr2802 | G0:0009142 | <1e-4 | ssr2009 | G0:0034641 | <1e-4 | slr1535 | G0:0043167 | <1e-4 | slr6006 | G0:0044422 | <1e-4 | ss17074 | G0:0016820 | 0.022  |
| sl10552 | G0:0009141 | <1e-4 | sl10787 | G0:0006733 | <1e-4 | slr1206 | G0:0016818 | <1e-4 | slr7073 | G0:0044446 | <1e-4 | sl10141 | G0:0016874 | 0.022  |
| sl10793 | G0:0055114 | <1e-4 | sl11411 | G0:0009150 | <1e-4 | slr1378 | G0:0005342 | <1e-4 | slr0291 | G0:0044425 | <1e-4 | sl11289 | G0:0016820 | 0.022  |
| slr1541 | G0:0042180 | <1e-4 | sl11359 | G0:0006576 | <1e-4 | slr1854 | G0:0015267 | <1e-4 | sl10007 | G0:0044444 | <1e-4 | slr7071 | G0:0016820 | 0.022  |
| ssr2611 | G0:0060255 | <1e-4 | slr1187 | G0:0009161 | <1e-4 | ssr6030 | G0:0015405 | <1e-4 | sl11531 | G0:0044464 | <1e-4 | slr1690 | G0:0016874 | 0.022  |
| slr0272 | G0:0051171 | <1e-4 | sl10645 | G0:0072527 | <1e-4 | slr1638 | G0:0015075 | <1e-4 | slr1544 | G0:0005575 | <1e-4 | slr0812 | G0:0016820 | 0.022  |
| sl11250 | G0:0042180 | <1e-4 | sl11764 | G0:0034654 | <1e-4 | ss10353 | G0:0042623 | <1e-4 | slr1544 | G0:0044464 | <1e-4 | slr1862 | G0:0016874 | 0.022  |
| ss13142 | G0:0009199 | <1e-4 | slr0104 | G0:0009991 | <1e-4 | ssr2843 | G0:0016746 | <1e-4 | slr1670 | G0:0005575 | <1e-4 | sl10419 | G0:0004518 | 0.0217 |
| ss11417 | G0:0006163 | <1e-4 | slr1519 | G0:0071842 | <1e-4 | sl10361 | G0:0003674 | <1e-4 | ss13383 | G0:0005575 | <1e-4 | sl10328 | G0:0004518 | 0.0217 |
| slr1816 | G0:0009150 | <1e-4 | sl10703 | G0:0071841 | <1e-4 | sl10177 | G0:0022891 | <1e-4 | slr1032 | G0:0044446 | <1e-4 | sl11232 | G0:0004518 | 0.0217 |
| slr0551 | G0:0044106 | <1e-4 | sl10101 | G0:0009199 | <1e-4 | sl11630 | G0:0015291 | <1e-4 | slr1566 | G0:0044444 | <1e-4 | slr7101 | G0:0004518 | 0.0217 |
| sl11163 | G0:0006220 | <1e-4 | sl15003 | G0:0019219 | <1e-4 | ss13829 | G0:0015291 | <1e-4 | sl17089 | G0:0044444 | <1e-4 | sl11691 | G0:0004518 | 0.0217 |
| slr6072 | G0:0006163 | <1e-4 | sl10253 | G0:0009309 | <1e-4 | slr5013 | G0:0015267 | <1e-4 | sl11659 | G0:0005575 | <1e-4 | sl11306 | G0:0004518 | 0.0217 |
| slr0731 | G0:0046128 | <1e-4 | slr0941 | G0:0048523 | <1e-4 | slr0729 | G0:0015291 | <1e-4 | slr0059 | G0:0044424 | <1e-4 | ss13383 | G0:0004518 | 0.0217 |
| slr0668 | G0:0006766 | <1e-4 | slr1616 | G0:0048522 | <1e-4 | sl10572 | G0:0015077 | <1e-4 | ssr3154 | G0:0044425 | <1e-4 | sl11160 | G0:0004518 | 0.0217 |
| slr0058 | G0:0065007 | <1e-4 | slr1958 | G0:0009141 | <1e-4 | ss10750 | G0:0043167 | <1e-4 | ss12920 | G0:0044425 | <1e-4 | slr6063 | G0:0004518 | 0.0217 |
| sl10301 | G0:0046394 | <1e-4 | slr0937 | G0:0044281 | <1e-4 | slr1702 | G0:0003674 | <1e-4 | ssr5011 | G0:0044446 | <1e-4 | slr0065 | G0:0004518 | 0.0217 |
| sl10861 | G0:0051716 | <1e-4 | ssr0536 | G0:0051234 | <1e-4 | sl11608 | G0:0015075 | <1e-4 | slr1327 | G0:0044422 | <1e-4 | slr1419 | G0:0004518 | 0.0217 |
| slr0863 | G0:0016054 | <1e-4 | sl11530 | G0:0072527 | <1e-4 | slr0459 | G0:0005342 | <1e-4 | ssr2615 | G0:0044422 | <1e-4 | ssr6003 | G0:0004518 | 0.0217 |
| sl10736 | G0:0019752 | <1e-4 | slr1073 | G0:0009394 | <1e-4 | sl11461 | G0:0060089 | <1e-4 | slr0431 | G0:0005575 | <1e-4 | ss12920 | G0:0004518 | 0.0217 |
| sl11873 | G0:0009057 | <1e-4 | ss17046 | G0:0034654 | <1e-4 | sl10996 | G0:0015267 | <1e-4 | slr0272 | G0:0044464 | <1e-4 | ss18003 | G0:0004518 | 0.0217 |
| sl11024 | G0:0009309 | <1e-4 | sl11680 | G0:0072522 | <1e-4 | sl10595 | G0:0015267 | <1e-4 | slr6016 | G0:0044444 | <1e-4 | sl10609 | G0:0004518 | 0.0217 |
| sl10930 | G0:0006631 | <1e-4 | sl10444 | G0:0034654 | <1e-4 | sl11063 | G0:0022803 | <1e-4 | sl11510 | G0:0005575 | <1e-4 | ss12781 | G0:0004518 | 0.0217 |
| slr0554 | G0:0009150 | <1e-4 | slr1619 | G0:0048878 | <1e-4 | slr1920 | G0:0022890 | <1e-4 | slr0303 | G0:0044446 | <1e-4 | slr6004 | G0:0004518 | 0.0217 |
| slr0521 | G0:0072522 | <1e-4 | ss12996 | G0:0043412 | <1e-4 | slr0810 | G0:0003674 | <1e-4 | sl10931 | G0:0044422 | <1e-4 | slr1260 | G0:0004518 | 0.0217 |

|         |            |       |         |            |       |         |            |       |         |            |       |         |            |        |
|---------|------------|-------|---------|------------|-------|---------|------------|-------|---------|------------|-------|---------|------------|--------|
| ssr1391 | G0:0048518 | <1e-4 | slr0325 | G0:0022607 | <1e-4 | slr5023 | G0:0022803 | <1e-4 | sl10298 | G0:0044425 | <1e-4 | slr0821 | G0:0004518 | 0.0217 |
| ssr1765 | G0:0042180 | <1e-4 | ssl5091 | G0:0009124 | <1e-4 | slr1658 | G0:0015077 | <1e-4 | sl11151 | G0:0044464 | <1e-4 | slr7014 | G0:0004518 | 0.0217 |
| sl10293 | G0:0044282 | <1e-4 | sl10678 | G0:0071841 | <1e-4 | slr2125 | G0:0015399 | <1e-4 | ssl3177 | G0:0044422 | <1e-4 | slr6005 | G0:0004518 | 0.0217 |
| slr1218 | G0:0022411 | <1e-4 | sl11355 | G0:0051716 | <1e-4 | slr1570 | G0:0043167 | <1e-4 | sl11659 | G0:0043226 | <1e-4 | sl15130 | G0:0004518 | 0.0217 |
| ssl5099 | G0:0009144 | <1e-4 | sl11350 | G0:0006732 | <1e-4 | slr1384 | G0:0016746 | <1e-4 | slr0049 | G0:0044422 | <1e-4 | slr1468 | G0:0004518 | 0.0217 |
| sl15090 | G0:0046907 | <1e-4 | slr2119 | G0:0046394 | <1e-4 | slr0637 | G0:0015291 | <1e-4 | sl10532 | G0:0005575 | <1e-4 | ssr5117 | G0:0004518 | 0.0217 |
| sl11135 | G0:0043412 | <1e-4 | sl10572 | G0:0044003 | <1e-4 | slr0468 | G0:0015075 | <1e-4 | slr0625 | G0:0044446 | <1e-4 | slr1178 | G0:0004518 | 0.0217 |
| slr1603 | G0:0016054 | <1e-4 | slr1062 | G0:0044283 | <1e-4 | ssl2069 | G0:0022891 | <1e-4 | slr6014 | G0:0005575 | <1e-4 | slr1464 | G0:0004518 | 0.0217 |
| ssr1698 | G0:0051171 | <1e-4 | sl10932 | G0:0046907 | <1e-4 | slr1880 | G0:0005342 | <1e-4 | slr1258 | G0:0044446 | <1e-4 | sl11355 | G0:0004518 | 0.0217 |
| slr1612 | G0:0009150 | <1e-4 | slr1762 | G0:0052111 | <1e-4 | ssr6062 | G0:0022836 | <1e-4 | ssl0467 | G0:0005575 | <1e-4 | sl11130 | G0:0004518 | 0.0217 |
| slr6106 | G0:0009144 | <1e-4 | slr1464 | G0:0080090 | <1e-4 | slr1534 | G0:0022857 | <1e-4 | sl10283 | G0:0005575 | <1e-4 | sl10846 | G0:0004518 | 0.0217 |
| sl10661 | G0:0009144 | <1e-4 | sl11736 | G0:0019751 | <1e-4 | sl10147 | G0:0016818 | <1e-4 | slr6008 | G0:0044464 | <1e-4 | slr0619 | G0:0004518 | 0.0217 |
| sl10996 | G0:0006631 | <1e-4 | sl10451 | G0:0071496 | <1e-4 | sl11315 | G0:0003674 | <1e-4 | sl10405 | G0:0005575 | <1e-4 | sl11696 | G0:0004518 | 0.0217 |
| ssr5019 | G0:0072522 | <1e-4 | slr0398 | G0:0044271 | <1e-4 | slr2060 | G0:0015075 | <1e-4 | ssl1263 | G0:0044422 | <1e-4 | sl10481 | G0:0004518 | 0.0217 |
| ssl2069 | G0:0072521 | <1e-4 | slr1659 | G0:0019219 | <1e-4 | slr1240 | G0:0005342 | <1e-4 | sl11961 | G0:0044464 | <1e-4 | slr1188 | G0:0004518 | 0.0217 |
| sl11060 | G0:0019362 | <1e-4 | sl10266 | G0:0044281 | <1e-4 | slr1619 | G0:0015291 | <1e-4 | slr0273 | G0:0044464 | <1e-4 | sl10751 | G0:0004518 | 0.0217 |
| slr6031 | G0:0031323 | <1e-4 | sl11512 | G0:0072524 | <1e-4 | ssr2755 | G0:0043167 | <1e-4 | slr0476 | G0:0043226 | <1e-4 | sl15026 | G0:0004518 | 0.0217 |
| sl10658 | G0:0019362 | <1e-4 | sl17077 | G0:0044003 | <1e-4 | sl10269 | G0:0022892 | <1e-4 | sl11500 | G0:0044464 | <1e-4 | ssr2912 | G0:0004518 | 0.0217 |
| slr1533 | G0:0006082 | <1e-4 | ssl2920 | G0:0043648 | <1e-4 | slr1263 | G0:0043167 | <1e-4 | slr1143 | G0:0044425 | <1e-4 | slr8014 | G0:0004518 | 0.0217 |
| sl10703 | G0:0008150 | <1e-4 | slr1110 | G0:0048522 | <1e-4 | slr0380 | G0:0015075 | <1e-4 | slr1045 | G0:0044424 | <1e-4 | slr0695 | G0:0004518 | 0.0217 |
| ssr6019 | G0:0051234 | <1e-4 | ssr2060 | G0:0009394 | <1e-4 | sl11715 | G0:0022890 | <1e-4 | slr7058 | G0:0005575 | <1e-4 | sl10994 | G0:0004518 | 0.0217 |
| slr0313 | G0:0019219 | <1e-4 | slr1114 | G0:0048878 | <1e-4 | ssl0312 | G0:0043167 | <1e-4 | slr1906 | G0:0044446 | <1e-4 | slr1186 | G0:0004518 | 0.0217 |
| sl10007 | G0:0009309 | <1e-4 | sl10060 | G0:0044248 | <1e-4 | slr0358 | G0:0015293 | <1e-4 | slr1056 | G0:0005575 | <1e-4 | ssr2611 | G0:0004518 | 0.0217 |
| slr1152 | G0:0006066 | <1e-4 | sl11659 | G0:0009056 | <1e-4 | sl11170 | G0:0042623 | <1e-4 | slr0913 | G0:0044464 | <1e-4 | sl15090 | G0:0004518 | 0.0217 |
| slr0300 | G0:0051716 | <1e-4 | slr1674 | G0:0051347 | <1e-4 | sl11752 | G0:0015399 | <1e-4 | sl10647 | G0:0044444 | <1e-4 | sg10002 | G0:0004518 | 0.0217 |
| slr0553 | G0:0016054 | <1e-4 | ssl1300 | G0:0006091 | <1e-4 | ssr1407 | G0:0022891 | <1e-4 | slr1315 | G0:0044424 | <1e-4 | sl10518 | G0:0004518 | 0.0217 |
| slr1307 | G0:0051818 | <1e-4 | ssr1698 | G0:0019637 | <1e-4 | slr0909 | G0:0016462 | <1e-4 | sl11509 | G0:0043226 | <1e-4 | slr6006 | G0:0004518 | 0.0217 |
| sl10853 | G0:0033013 | <1e-4 | ssl3291 | G0:0046394 | <1e-4 | slr0509 | G0:0022890 | <1e-4 | slr2048 | G0:0043226 | <1e-4 | slr1363 | G0:0004518 | 0.0217 |
| slr7025 | G0:0051234 | <1e-4 | sl11464 | G0:0065007 | <1e-4 | sl11658 | G0:0015267 | <1e-4 | slr1648 | G0:0005575 | <1e-4 | sl11401 | G0:0004518 | 0.0217 |
| sl10737 | G0:0052188 | <1e-4 | slr1097 | G0:0065007 | <1e-4 | sl11570 | G0:0043492 | <1e-4 | slr1807 | G0:0005575 | <1e-4 | sl15046 | G0:0004518 | 0.0217 |
| slr1658 | G0:0046907 | <1e-4 | ssl1004 | G0:0050789 | <1e-4 | sl10382 | G0:0043492 | <1e-4 | slr6073 | G0:0044422 | <1e-4 | sl10658 | G0:0004518 | 0.0217 |
| sl10216 | G0:0006082 | <1e-4 | sl18002 | G0:0033013 | <1e-4 | ssr2009 | G0:0022892 | <1e-4 | slr0876 | G0:0043226 | <1e-4 | sl11765 | G0:0004518 | 0.0217 |
| sl10861 | G0:0006396 | <1e-4 | sl11486 | G0:0010468 | <1e-4 | ssl2420 | G0:0022803 | <1e-4 | slr0709 | G0:0005575 | <1e-4 | slr1069 | G0:0004518 | 0.0217 |
| sl10428 | G0:0009308 | <1e-4 | slr0818 | G0:0009165 | <1e-4 | sl11218 | G0:0015291 | <1e-4 | slr8014 | G0:0005575 | <1e-4 | sl11485 | G0:0004518 | 0.0217 |
| sl11219 | G0:0043648 | <1e-4 | slr1699 | G0:0019362 | <1e-4 | slr1301 | G0:0022892 | <1e-4 | ssr5020 | G0:0043226 | <1e-4 | sl17063 | G0:0004518 | 0.0217 |
| slr1025 | G0:0006733 | <1e-4 | slr0769 | G0:0051716 | <1e-4 | slr0334 | G0:0022890 | <1e-4 | slr1177 | G0:0044424 | <1e-4 | slr7059 | G0:0004518 | 0.0217 |
| sl10266 | G0:0006793 | <1e-4 | sl10839 | G0:0072524 | <1e-4 | sl10446 | G0:0022832 | <1e-4 | sl11730 | G0:0044464 | <1e-4 | ssr6048 | G0:0004518 | 0.0217 |
| slr0816 | G0:0050789 | <1e-4 | slr1599 | G0:0009141 | <1e-4 | sl11061 | G0:0043167 | <1e-4 | slr0482 | G0:0005575 | <1e-4 | ssl5031 | G0:0004518 | 0.0217 |
| slr6045 | G0:0016053 | <1e-4 | ssl0312 | G0:0071841 | <1e-4 | slr0287 | G0:0015075 | <1e-4 | sl10266 | G0:0044464 | <1e-4 | sl11378 | G0:0004518 | 0.0217 |
| slr2005 | G0:0046164 | <1e-4 | sl11004 | G0:0042180 | <1e-4 | sl11071 | G0:0022832 | <1e-4 | sg10001 | G0:0005575 | <1e-4 | sl10241 | G0:0004518 | 0.0217 |
| ssr0536 | G0:0006163 | <1e-4 | sl10192 | G0:0009889 | <1e-4 | sl11162 | G0:0043492 | <1e-4 | ssr7036 | G0:0044464 | <1e-4 | sl10742 | G0:0004518 | 0.0217 |
| sl11726 | G0:0072527 | <1e-4 | slr7094 | G0:0019222 | <1e-4 | slr8014 | G0:0060089 | <1e-4 | ssl2996 | G0:0005575 | <1e-4 | slr0059 | G0:0004518 | 0.0217 |
| slr5102 | G0:0009892 | <1e-4 | sl11372 | G0:0042455 | <1e-4 | slr6088 | G0:0022832 | <1e-4 | slr0243 | G0:0044425 | <1e-4 | sl10293 | G0:0004518 | 0.0217 |
| sl10595 | G0:0022411 | <1e-4 | slr7095 | G0:0051171 | <1e-4 | sl17028 | G0:0015399 | <1e-4 | slr1415 | G0:0044444 | <1e-4 | sl10762 | G0:0004518 | 0.0217 |
| slr1970 | G0:0006766 | <1e-4 | ssl2971 | G0:0009056 | <1e-4 | ssl7042 | G0:0043167 | <1e-4 | sl10669 | G0:0044424 | <1e-4 | slr2101 | G0:0004518 | 0.0217 |
| slr1533 | G0:0065007 | <1e-4 | slr1932 | G0:0048523 | <1e-4 | slr1056 | G0:0043167 | <1e-4 | slr0964 | G0:0044446 | <1e-4 | sl10860 | G0:0004518 | 0.0217 |
| sl11652 | G0:0051716 | <1e-4 | sl10827 | G0:0048878 | <1e-4 | ssr7017 | G0:0043492 | <1e-4 | sl10243 | G0:0044446 | <1e-4 | ssr3189 | G0:0004518 | 0.0217 |
| slr0594 | G0:0018130 | <1e-4 | slr0483 | G0:0016052 | <1e-4 | slr1726 | G0:0015291 | <1e-4 | ssr2998 | G0:0043226 | <1e-4 | slr1576 | G0:0004518 | 0.0217 |
| sl11965 | G0:0043412 | <1e-4 | slr1127 | G0:0005996 | <1e-4 | ssl7045 | G0:0022838 | <1e-4 | sl10980 | G0:0043226 | <1e-4 | sl10597 | G0:0004518 | 0.0217 |
| slr6066 | G0:0071496 | <1e-4 | slr0971 | G0:0019362 | <1e-4 | sl11606 | G0:0015399 | <1e-4 | sl11765 | G0:0044446 | <1e-4 | ssl3451 | G0:0004518 | 0.0217 |
| sl10394 | G0:0045184 | <1e-4 | slr1800 | G0:0042180 | <1e-4 | ssl6035 | G0:0003674 | <1e-4 | sl10846 | G0:0044422 | <1e-4 | slr1116 | G0:0004518 | 0.0217 |
| slr0305 | G0:0001932 | <1e-4 | slr1188 | G0:0044271 | <1e-4 | slr0989 | G0:0022891 | <1e-4 | slr0232 | G0:0044464 | <1e-4 | slr1998 | G0:0004518 | 0.0217 |
| ssl3573 | G0:0009142 | <1e-4 | slr1659 | G0:0006811 | <1e-4 | slr0271 | G0:0043167 | <1e-4 | sl10294 | G0:0044422 | <1e-4 | sl10176 | G0:0004518 | 0.0217 |
| slr1163 | G0:0016052 | <1e-4 | slr1572 | G0:0009991 | <1e-4 | slr7060 | G0:0022803 | <1e-4 | sl11656 | G0:0044425 | <1e-4 | ssl1498 | G0:0004518 | 0.0217 |

|         |            |       |         |            |       |         |            |       |         |            |       |         |            |        |
|---------|------------|-------|---------|------------|-------|---------|------------|-------|---------|------------|-------|---------|------------|--------|
| slr1150 | G0:0009126 | <1e-4 | sl11396 | G0:0051246 | <1e-4 | ssr3129 | G0:0060089 | <1e-4 | slr0594 | G0:0044464 | <1e-4 | slr1104 | G0:0004518 | 0.0217 |
| sl10446 | G0:0034654 | <1e-4 | sl11002 | G0:0006082 | <1e-4 | slr1547 | G0:0005342 | <1e-4 | sl10442 | G0:0005575 | <1e-4 | sl10630 | G0:0004518 | 0.0217 |
| sl10325 | G0:0009117 | <1e-4 | slr7015 | G0:0009263 | <1e-4 | sl10911 | G0:0022891 | <1e-4 | slr0664 | G0:0043226 | <1e-4 | sl15061 | G0:0004518 | 0.0217 |
| ss15025 | G0:0006732 | <1e-4 | sl10382 | G0:0051347 | <1e-4 | sl10742 | G0:0015399 | <1e-4 | slr1122 | G0:0005575 | <1e-4 | slr0592 | G0:0004518 | 0.0217 |
| sl11532 | G0:0008610 | <1e-4 | ssr2611 | G0:0005996 | <1e-4 | slr0326 | G0:0022832 | <1e-4 | sl10505 | G0:0044444 | <1e-4 | slr1362 | G0:0004518 | 0.0217 |
| slr1177 | G0:0009987 | <1e-4 | slr1648 | G0:0080090 | <1e-4 | ssr1041 | G0:0022892 | <1e-4 | sl10564 | G0:0005575 | <1e-4 | sl10803 | G0:0004518 | 0.0217 |
| sl10241 | G0:0046164 | <1e-4 | slr1397 | G0:0050896 | <1e-4 | ssr0759 | G0:0022836 | <1e-4 | slr0318 | G0:0044444 | <1e-4 | ss15098 | G0:0004518 | 0.0217 |
| slr1593 | G0:0006811 | <1e-4 | ssr1258 | G0:0009059 | <1e-4 | slr1863 | G0:0016817 | <1e-4 | slr0770 | G0:0044464 | <1e-4 | ss11004 | G0:0004518 | 0.0217 |
| slr1573 | G0:0034641 | <1e-4 | ss15103 | G0:0046394 | <1e-4 | sl11832 | G0:0016818 | <1e-4 | slr2118 | G0:0044425 | <1e-4 | slr1677 | G0:0004518 | 0.0217 |
| sl10609 | G0:0006576 | <1e-4 | slr0013 | G0:0009124 | <1e-4 | slr1768 | G0:0022891 | <1e-4 | slr7014 | G0:0044422 | <1e-4 | sl11960 | G0:0004518 | 0.0217 |
| slr2121 | G0:0006091 | <1e-4 | slr0569 | G0:0006733 | <1e-4 | slr1530 | G0:0015267 | <1e-4 | slr1047 | G0:0005575 | <1e-4 | ss11520 | G0:0004518 | 0.0217 |
| ssr1766 | G0:0072527 | <1e-4 | sl10157 | G0:0045184 | <1e-4 | ss16061 | G0:0060089 | <1e-4 | slr6009 | G0:0044424 | <1e-4 | slr2032 | G0:0004518 | 0.0217 |
| ssr2803 | G0:0080090 | <1e-4 | slr0453 | G0:0055086 | <1e-4 | ssr1473 | G0:0015293 | <1e-4 | slr1815 | G0:0044422 | <1e-4 | slr1162 | G0:0004518 | 0.0217 |
| sl10545 | G0:0050794 | <1e-4 | ss15027 | G0:0071840 | <1e-4 | slr1601 | G0:0015405 | <1e-4 | sl10376 | G0:0044446 | <1e-4 | slr7023 | G0:0004518 | 0.0217 |
| ss12471 | G0:0071842 | <1e-4 | slr0821 | G0:0010556 | <1e-4 | sl10670 | G0:0015075 | <1e-4 | slr0658 | G0:0044425 | <1e-4 | ssr2422 | G0:0004518 | 0.0217 |
| slr2119 | G0:0006163 | <1e-4 | slr1847 | G0:0044281 | <1e-4 | ss10109 | G0:0015293 | <1e-4 | sl11411 | G0:0044444 | <1e-4 | slr0655 | G0:0004518 | 0.0217 |
| sl10496 | G0:0050896 | <1e-4 | slr6009 | G0:0048878 | <1e-4 | sl11926 | G0:0016817 | <1e-4 | sg10002 | G0:0044424 | <1e-4 | sl10872 | G0:0004518 | 0.0217 |
| sl11749 | G0:0044260 | <1e-4 | slr0243 | G0:0018130 | <1e-4 | ssr2754 | G0:0022832 | <1e-4 | sl10493 | G0:0044444 | <1e-4 | ssr7036 | G0:0004518 | 0.0217 |
| slr1895 | G0:0009165 | <1e-4 | slr1668 | G0:0043933 | <1e-4 | slr0483 | G0:0022832 | <1e-4 | sl11002 | G0:0044422 | <1e-4 | ssr0335 | G0:0004518 | 0.0217 |
| slr6075 | G0:0055114 | <1e-4 | slr1977 | G0:0044275 | <1e-4 | sl11939 | G0:0016741 | <1e-4 | sl10602 | G0:0044464 | <1e-4 | slr1753 | G0:0004518 | 0.0217 |
| slr0208 | G0:0044260 | <1e-4 | sl11510 | G0:0019362 | <1e-4 | slr0594 | G0:0060089 | <1e-4 | slr1932 | G0:0043226 | <1e-4 | sl11921 | G0:0004518 | 0.0217 |
| slr2025 | G0:0031640 | <1e-4 | slr0689 | G0:0019222 | <1e-4 | sl11021 | G0:0015405 | <1e-4 | ss10832 | G0:0044425 | <1e-4 | sl15032 | G0:0004518 | 0.0217 |
| sl10208 | G0:0001932 | <1e-4 | slr1667 | G0:0006082 | <1e-4 | ssr0761 | G0:0015075 | <1e-4 | slr0960 | G0:0044446 | <1e-4 | slr0869 | G0:0004518 | 0.0217 |
| sl10446 | G0:0019637 | <1e-4 | slr1790 | G0:0071842 | <1e-4 | sl11942 | G0:0016741 | <1e-4 | slr1568 | G0:0044444 | <1e-4 | slr1535 | G0:0004518 | 0.0217 |
| ss15064 | G0:0005996 | <1e-4 | sl10543 | G0:0009059 | <1e-4 | sl11068 | G0:0015405 | <1e-4 | sl10827 | G0:0005575 | <1e-4 | slr1600 | G0:0004518 | 0.0217 |
| slr2032 | G0:0006631 | <1e-4 | slr0971 | G0:0009141 | <1e-4 | slr6074 | G0:0022891 | <1e-4 | slr0364 | G0:0005575 | <1e-4 | slr1923 | G0:0004518 | 0.0217 |
| slr6016 | G0:0044260 | <1e-4 | slr7092 | G0:0019222 | <1e-4 | slr1513 | G0:0022832 | <1e-4 | sl10185 | G0:0044424 | <1e-4 | slr0356 | G0:0004518 | 0.0217 |
| ss12065 | G0:0006163 | <1e-4 | slr1179 | G0:0044003 | <1e-4 | slr0885 | G0:0016817 | <1e-4 | slr0249 | G0:0044424 | <1e-4 | sl11022 | G0:0004518 | 0.0217 |
| ssr5020 | G0:0010556 | <1e-4 | sl18032 | G0:0044003 | <1e-4 | ss12733 | G0:0022838 | <1e-4 | ss13549 | G0:0044464 | <1e-4 | slr6101 | G0:0004518 | 0.0217 |
| sl10785 | G0:0010556 | <1e-4 | ssr2615 | G0:0009117 | <1e-4 | sl11426 | G0:0015267 | <1e-4 | slr0059 | G0:0044444 | <1e-4 | ssr6085 | G0:0004518 | 0.0217 |
| sl11472 | G0:0042451 | <1e-4 | sl10335 | G0:0019752 | <1e-4 | sl10298 | G0:0016741 | <1e-4 | slr0059 | G0:0005575 | <1e-4 | sl11004 | G0:0004518 | 0.0217 |
| ss12717 | G0:0006732 | <1e-4 | sl15004 | G0:0016053 | <1e-4 | slr1814 | G0:0022838 | <1e-4 | slr2004 | G0:0044424 | <1e-4 | slr7092 | G0:0004518 | 0.0217 |
| sl10761 | G0:0009123 | <1e-4 | sl10263 | G0:0051171 | <1e-4 | ssr5121 | G0:0022890 | <1e-4 | sl17064 | G0:0044424 | <1e-4 | ss12717 | G0:0004518 | 0.0217 |
| slr1127 | G0:0019222 | <1e-4 | slr2027 | G0:0071841 | <1e-4 | sl10141 | G0:0022891 | <1e-4 | slr1507 | G0:0044425 | <1e-4 | sl10853 | G0:0004518 | 0.0217 |
| ss17074 | G0:0050794 | <1e-4 | sl11373 | G0:0009889 | <1e-4 | slr1223 | G0:0016818 | <1e-4 | sl11763 | G0:0044464 | <1e-4 | slr1273 | G0:0004518 | 0.0217 |
| ss13382 | G0:0071554 | <1e-4 | slr0692 | G0:0042180 | <1e-4 | sl18012 | G0:0022803 | <1e-4 | slr1939 | G0:0043226 | <1e-4 | sl17047 | G0:0004518 | 0.0217 |
| slr1425 | G0:0080090 | <1e-4 | sl10875 | G0:0080090 | <1e-4 | sl11219 | G0:0022890 | <1e-4 | slr5127 | G0:0044422 | <1e-4 | slr0168 | G0:0004518 | 0.0217 |
| slr0619 | G0:0006766 | <1e-4 | sl11024 | G0:0046907 | <1e-4 | sl10984 | G0:0022857 | <1e-4 | slr0313 | G0:0044422 | <1e-4 | sl10498 | G0:0004518 | 0.0217 |
| ssr2802 | G0:0006732 | <1e-4 | slr1573 | G0:0072528 | <1e-4 | sl11730 | G0:0060089 | <1e-4 | slr0625 | G0:0044422 | <1e-4 | ss15007 | G0:0004518 | 0.0217 |
| sl10268 | G0:0016053 | <1e-4 | slr1619 | G0:0071840 | <1e-4 | sl10732 | G0:0022838 | <1e-4 | sl11862 | G0:0043226 | <1e-4 | slr0552 | G0:0004518 | 0.0217 |
| sl10406 | G0:0034641 | <1e-4 | sl11766 | G0:0072524 | <1e-4 | ss10109 | G0:0015075 | <1e-4 | sl10267 | G0:0043226 | <1e-4 | slr7012 | G0:0004518 | 0.0217 |
| sl10216 | G0:0009142 | <1e-4 | sl11511 | G0:0044283 | <1e-4 | slr0514 | G0:0016817 | <1e-4 | sl17006 | G0:0043226 | <1e-4 | ssr5120 | G0:0004518 | 0.0217 |
| slr6045 | G0:0009141 | <1e-4 | slr1470 | G0:0009308 | <1e-4 | slr1196 | G0:0022890 | <1e-4 | sl10310 | G0:0044464 | <1e-4 | ssr6020 | G0:0004518 | 0.0217 |
| sl11873 | G0:0044255 | <1e-4 | sl11934 | G0:0006082 | <1e-4 | sl10763 | G0:0003674 | <1e-4 | slr0168 | G0:0005575 | <1e-4 | ss11923 | G0:0004518 | 0.0217 |
| sl11225 | G0:0009124 | <1e-4 | slr1864 | G0:0046128 | <1e-4 | slr1406 | G0:0022891 | <1e-4 | slr5017 | G0:0044464 | <1e-4 | sl10611 | G0:0004518 | 0.0217 |
| slr1990 | G0:0009892 | <1e-4 | slr0294 | G0:0005996 | <1e-4 | slr0602 | G0:0022890 | <1e-4 | slr1513 | G0:0044422 | <1e-4 | slr0598 | G0:0004518 | 0.0217 |
| sl10735 | G0:0055086 | <1e-4 | slr0519 | G0:0043436 | <1e-4 | sl11830 | G0:0022857 | <1e-4 | slr0516 | G0:0044425 | <1e-4 | sl10710 | G0:0004518 | 0.0217 |
| slr0111 | G0:0044271 | <1e-4 | slr6064 | G0:0051234 | <1e-4 | slr0262 | G0:0022890 | <1e-4 | ss17022 | G0:0044422 | <1e-4 | sl17043 | G0:0004518 | 0.0217 |
| ss12064 | G0:0034641 | <1e-4 | sl10023 | G0:0043170 | <1e-4 | slr1618 | G0:0022857 | <1e-4 | slr6005 | G0:0005575 | <1e-4 | slr0108 | G0:0005515 | 0.0216 |
| slr1530 | G0:0001932 | <1e-4 | sl10496 | G0:0008610 | <1e-4 | sl11761 | G0:0003674 | <1e-4 | slr0765 | G0:0044444 | <1e-4 | sl11995 | G0:0005515 | 0.0216 |
| slr6007 | G0:0051716 | <1e-4 | ss13829 | G0:0006163 | <1e-4 | slr0482 | G0:0022803 | <1e-4 | slr0876 | G0:0044422 | <1e-4 | ssr3154 | G0:0005515 | 0.0216 |
| ssr6089 | G0:0009308 | <1e-4 | slr0149 | G0:0042180 | <1e-4 | slr1163 | G0:0015077 | <1e-4 | slr1571 | G0:0005575 | <1e-4 | sl10656 | G0:0005515 | 0.0216 |
| ssr1375 | G0:0065007 | <1e-4 | slr1819 | G0:0051246 | <1e-4 | slr6013 | G0:0016818 | <1e-4 | ss11255 | G0:0043226 | <1e-4 | sl12006 | G0:0004518 | 0.0213 |
| sl11751 | G0:0044255 | <1e-4 | sl11250 | G0:0031326 | <1e-4 | ssr2912 | G0:0022890 | <1e-4 | slr7095 | G0:0044422 | <1e-4 | ssr3532 | G0:0004518 | 0.0213 |

|         |            |       |         |            |       |         |            |       |         |            |       |         |            |        |
|---------|------------|-------|---------|------------|-------|---------|------------|-------|---------|------------|-------|---------|------------|--------|
| slr1127 | G0:0043170 | <1e-4 | slr0262 | G0:0051188 | <1e-4 | sl10909 | G0:0022803 | <1e-4 | sl11002 | G0:0043226 | <1e-4 | ssr1698 | G0:0004518 | 0.0213 |
| sl11504 | G0:0051246 | <1e-4 | slr1699 | G0:0009199 | <1e-4 | slr0887 | G0:0015077 | <1e-4 | slr2119 | G0:0044424 | <1e-4 | slr1196 | G0:0004518 | 0.0213 |
| sl11239 | G0:0050789 | <1e-4 | sl11583 | G0:0080090 | <1e-4 | sl10274 | G0:0015293 | <1e-4 | slr0699 | G0:0044444 | <1e-4 | sl11218 | G0:0004518 | 0.0213 |
| slr0053 | G0:0006631 | <1e-4 | sl11188 | G0:0016052 | <1e-4 | slr1307 | G0:0015291 | <1e-4 | slr1083 | G0:0044424 | <1e-4 | sl11433 | G0:0004518 | 0.0213 |
| slr0287 | G0:0044282 | <1e-4 | slr1342 | G0:0034654 | <1e-4 | sl10871 | G0:0060089 | <1e-4 | slr1628 | G0:0005575 | <1e-4 | slr1533 | G0:0004518 | 0.0213 |
| sl11736 | G0:0006720 | <1e-4 | sl10487 | G0:0009892 | <1e-4 | slr8044 | G0:0022890 | <1e-4 | slr6073 | G0:0005575 | <1e-4 | ss10787 | G0:0004518 | 0.0213 |
| sl10242 | G0:0019637 | <1e-4 | slr0145 | G0:0052188 | <1e-4 | slr0962 | G0:0022892 | <1e-4 | sl10272 | G0:0005575 | <1e-4 | slr0503 | G0:0004518 | 0.0213 |
| sl11632 | G0:0034660 | <1e-4 | slr1338 | G0:0009144 | <1e-4 | sl11830 | G0:0022892 | <1e-4 | slr1923 | G0:0044425 | <1e-4 | slr1674 | G0:0004518 | 0.0213 |
| slr2000 | G0:0019752 | <1e-4 | slr1676 | G0:0009126 | <1e-4 | ss10242 | G0:0015077 | <1e-4 | sl10181 | G0:0044444 | <1e-4 | sl11934 | G0:0004518 | 0.0213 |
| ssr3532 | G0:0055086 | <1e-4 | slr0179 | G0:0009059 | <1e-4 | sl10597 | G0:0022803 | <1e-4 | sl10508 | G0:0044444 | <1e-4 | sl10854 | G0:0004518 | 0.0213 |
| slr1110 | G0:0010468 | <1e-4 | slr1927 | G0:0009142 | <1e-4 | slr5077 | G0:0022836 | <1e-4 | ss12148 | G0:0044444 | <1e-4 | slr0876 | G0:0004518 | 0.0213 |
| sl11735 | G0:0009893 | <1e-4 | slr0305 | G0:0009056 | <1e-4 | sl10218 | G0:0016818 | <1e-4 | ssr1256 | G0:0044446 | <1e-4 | slr1353 | G0:0004518 | 0.0213 |
| slr1095 | G0:0055114 | <1e-4 | sl10982 | G0:0072522 | <1e-4 | sl10181 | G0:0015075 | <1e-4 | ssr6078 | G0:0044446 | <1e-4 | slr1194 | G0:0004518 | 0.0213 |
| slr1260 | G0:0042451 | <1e-4 | sl10253 | G0:0044248 | <1e-4 | sl10499 | G0:0015293 | <1e-4 | sl11825 | G0:0044446 | <1e-4 | sl10508 | G0:0004518 | 0.0213 |
| sl11654 | G0:0065007 | <1e-4 | ssr3572 | G0:0043549 | <1e-4 | slr0431 | G0:0015293 | <1e-4 | slr1737 | G0:0044424 | <1e-4 | slr0250 | G0:0004518 | 0.0213 |
| sl11979 | G0:0009123 | <1e-4 | sl10294 | G0:0050794 | <1e-4 | slr0695 | G0:0022857 | <1e-4 | slr1618 | G0:0044425 | <1e-4 | sl11942 | G0:0004518 | 0.0213 |
| sl10980 | G0:0044003 | <1e-4 | sl10354 | G0:0051716 | <1e-4 | slr1677 | G0:0005342 | <1e-4 | sl10760 | G0:0005575 | <1e-4 | slr0937 | G0:0004518 | 0.0213 |
| ssr0109 | G0:0009889 | <1e-4 | ssr2333 | G0:0060255 | <1e-4 | ssr6086 | G0:0016818 | <1e-4 | ss16061 | G0:0044444 | <1e-4 | sl10382 | G0:0004518 | 0.0213 |
| slr0376 | G0:0019219 | <1e-4 | ssr3467 | G0:0090304 | <1e-4 | slr8014 | G0:0015399 | <1e-4 | slr2012 | G0:0044464 | <1e-4 | slr1066 | G0:0004518 | 0.0213 |
| sl10625 | G0:0006220 | <1e-4 | sl10265 | G0:0019751 | <1e-4 | sl10444 | G0:0015291 | <1e-4 | slr6101 | G0:0044444 | <1e-4 | sl11586 | G0:0004518 | 0.0213 |
| slr0887 | G0:0045184 | <1e-4 | sl11965 | G0:0045184 | <1e-4 | slr1470 | G0:0015405 | <1e-4 | sl10314 | G0:0044444 | <1e-4 | slr0423 | G0:0004518 | 0.0213 |
| slr7012 | G0:0048519 | <1e-4 | sl10939 | G0:0034641 | <1e-4 | slr0923 | G0:0016817 | <1e-4 | ssr2060 | G0:0005575 | <1e-4 | sl11174 | G0:0004518 | 0.0213 |
| sl10997 | G0:0046164 | <1e-4 | sl10096 | G0:0051818 | <1e-4 | slr0023 | G0:0016746 | <1e-4 | sl10735 | G0:0044464 | <1e-4 | sl11528 | G0:0005975 | 0.0212 |
| slr5102 | G0:0019219 | <1e-4 | sl10780 | G0:0042451 | <1e-4 | slr1342 | G0:0016746 | <1e-4 | sl18033 | G0:0005575 | <1e-4 | sl11272 | G0:0005975 | 0.0212 |
| sl10661 | G0:0016052 | <1e-4 | ssr0657 | G0:0050801 | <1e-4 | slr1865 | G0:0016817 | <1e-4 | slr0821 | G0:0044425 | <1e-4 | ssr3154 | G0:0005975 | 0.0212 |
| slr1999 | G0:0034654 | <1e-4 | sl11942 | G0:0009987 | <1e-4 | slr1644 | G0:0022832 | <1e-4 | sl17047 | G0:0044446 | <1e-4 | sl10488 | G0:0003723 | 0.0211 |
| slr5087 | G0:0046164 | <1e-4 | slr5018 | G0:0044281 | <1e-4 | slr6028 | G0:0015293 | <1e-4 | sl10911 | G0:0044444 | <1e-4 | sl10822 | G0:0016820 | 0.0208 |
| sl10479 | G0:0044275 | <1e-4 | sl11004 | G0:0009124 | <1e-4 | sl10283 | G0:0015293 | <1e-4 | slr1081 | G0:0044422 | <1e-4 | slr1851 | G0:0016820 | 0.0208 |
| sl11926 | G0:0001932 | <1e-4 | slr0930 | G0:0008610 | <1e-4 | slr0812 | G0:0008171 | <1e-4 | slr2084 | G0:0044464 | <1e-4 | sl10183 | G0:0016820 | 0.0208 |
| slr1690 | G0:0044248 | <1e-4 | slr0589 | G0:0051179 | <1e-4 | sl11950 | G0:0015405 | <1e-4 | sl11702 | G0:0005575 | <1e-4 | slr0923 | G0:0016820 | 0.0208 |
| ssr7084 | G0:0009892 | <1e-4 | slr1660 | G0:0008150 | <1e-4 | slr6103 | G0:0015291 | <1e-4 | slr6090 | G0:0044425 | <1e-4 | ss12733 | G0:0016820 | 0.0208 |
| sl12007 | G0:0033013 | <1e-4 | slr1023 | G0:0050789 | <1e-4 | ssr2962 | G0:0016746 | <1e-4 | sl10048 | G0:0005575 | <1e-4 | slr1047 | G0:0016820 | 0.0208 |
| slr0960 | G0:0009259 | <1e-4 | sl11692 | G0:0043412 | <1e-4 | ss15096 | G0:0015267 | <1e-4 | slr1066 | G0:0044444 | <1e-4 | slr0978 | G0:0016820 | 0.0208 |
| slr2118 | G0:0009892 | <1e-4 | sl10400 | G0:0031323 | <1e-4 | sl11692 | G0:0008171 | <1e-4 | slr1290 | G0:0005575 | <1e-4 | sl10577 | G0:0016820 | 0.0208 |
| slr0642 | G0:0006811 | <1e-4 | ss10350 | G0:0009262 | <1e-4 | slr1807 | G0:0043492 | <1e-4 | ssr6079 | G0:0044422 | <1e-4 | sl11526 | G0:0016820 | 0.0208 |
| slr0147 | G0:0048878 | <1e-4 | ss12733 | G0:0072521 | <1e-4 | slr1619 | G0:0015075 | <1e-4 | slr1260 | G0:0044444 | <1e-4 | sl10022 | G0:0016820 | 0.0208 |
| sl12011 | G0:0022411 | <1e-4 | sl11680 | G0:0051818 | <1e-4 | ssr7093 | G0:0042623 | <1e-4 | sl10444 | G0:0044446 | <1e-4 | sl10175 | G0:0016820 | 0.0208 |
| slr1407 | G0:0006631 | <1e-4 | slr0651 | G0:0009309 | <1e-4 | slr0209 | G0:0005342 | <1e-4 | sl17006 | G0:0005575 | <1e-4 | slr1444 | G0:0016820 | 0.0208 |
| sl10703 | G0:0046128 | <1e-4 | slr0680 | G0:0052111 | <1e-4 | sl11866 | G0:0022891 | <1e-4 | sl10263 | G0:0005575 | <1e-4 | slr0496 | G0:0016820 | 0.0208 |
| ssr7093 | G0:0044281 | <1e-4 | slr0496 | G0:0051818 | <1e-4 | sl10293 | G0:0003674 | <1e-4 | slr6022 | G0:0005575 | <1e-4 | slr0589 | G0:0016820 | 0.0208 |
| sl11222 | G0:0009126 | <1e-4 | sl11203 | G0:0080090 | <1e-4 | slr1266 | G0:0016462 | <1e-4 | sl10172 | G0:0044425 | <1e-4 | sl10361 | G0:0016820 | 0.0208 |
| slr1258 | G0:0006220 | <1e-4 | sl17077 | G0:0009117 | <1e-4 | slr0789 | G0:0016818 | <1e-4 | slr0709 | G0:0044446 | <1e-4 | slr1431 | G0:0004871 | 0.0206 |
| slr1097 | G0:0052188 | <1e-4 | sl11880 | G0:0051234 | <1e-4 | slr1699 | G0:0016462 | <1e-4 | ssr1698 | G0:0044464 | <1e-4 | slr1493 | G0:0006259 | 0.02   |
| slr0480 | G0:0006811 | <1e-4 | slr1789 | G0:0052188 | <1e-4 | slr1807 | G0:0016741 | <1e-4 | sl11068 | G0:0044425 | <1e-4 | slr1209 | G0:0006259 | 0.02   |
| slr1150 | G0:0009987 | <1e-4 | slr0038 | G0:0009142 | <1e-4 | slr1752 | G0:0015293 | <1e-4 | slr0816 | G0:0005575 | <1e-4 | sl11938 | G0:0006259 | 0.02   |
| slr1266 | G0:0046164 | <1e-4 | ssr6019 | G0:0050789 | <1e-4 | slr1590 | G0:0043167 | <1e-4 | ss15008 | G0:0044424 | <1e-4 | sl10225 | G0:0006259 | 0.02   |
| sl10192 | G0:0008150 | <1e-4 | ss15099 | G0:0042455 | <1e-4 | sl16055 | G0:0022890 | <1e-4 | slr1342 | G0:0044422 | <1e-4 | slr1690 | G0:0006259 | 0.02   |
| sl11702 | G0:0031326 | <1e-4 | sl10909 | G0:0009394 | <1e-4 | sl11109 | G0:0005342 | <1e-4 | sl10781 | G0:0005575 | <1e-4 | sl11350 | G0:0006259 | 0.02   |
| slr0287 | G0:0009262 | <1e-4 | sl10732 | G0:0009260 | <1e-4 | sl11233 | G0:0022857 | <1e-4 | ss13692 | G0:0043226 | <1e-4 | sl10572 | G0:0006259 | 0.02   |
| ss11378 | G0:0019751 | <1e-4 | slr1917 | G0:0050896 | <1e-4 | ssr7017 | G0:0015293 | <1e-4 | ss12717 | G0:0044444 | <1e-4 | sl10737 | G0:0006259 | 0.02   |
| slr0479 | G0:0006720 | <1e-4 | sl11130 | G0:0046394 | <1e-4 | slr1222 | G0:0003674 | <1e-4 | ssr1114 | G0:0044425 | <1e-4 | slr1383 | G0:0006259 | 0.02   |
| sl10678 | G0:0016052 | <1e-4 | slr0325 | G0:0006163 | <1e-4 | sl11155 | G0:0016817 | <1e-4 | ss11378 | G0:0005575 | <1e-4 | sl10827 | G0:0006259 | 0.02   |
| ss10294 | G0:0051234 | <1e-4 | sl18019 | G0:0046394 | <1e-4 | slr7013 | G0:0015077 | <1e-4 | sl10925 | G0:0044422 | <1e-4 | sl10981 | G0:0006259 | 0.02   |
| sl10933 | G0:0009144 | <1e-4 | slr0291 | G0:0034654 | <1e-4 | sl10985 | G0:0016788 | <1e-4 | slr1644 | G0:0044422 | <1e-4 | sl11634 | G0:0006259 | 0.02   |



|         |            |       |         |            |       |         |            |       |         |            |       |         |            |        |
|---------|------------|-------|---------|------------|-------|---------|------------|-------|---------|------------|-------|---------|------------|--------|
| s111135 | G0:0034660 | <1e-4 | s1r6006 | G0:0001932 | <1e-4 | s110984 | G0:0016818 | <1e-4 | s110743 | G0:0044425 | <1e-4 | s111399 | G0:0006259 | 0.02   |
| s110691 | G0:0010468 | <1e-4 | s111006 | G0:0009889 | <1e-4 | ssr2781 | G0:0022838 | <1e-4 | s111769 | G0:0044422 | <1e-4 | sml0011 | G0:0006259 | 0.02   |
| s117030 | G0:0065007 | <1e-4 | s110822 | G0:0016054 | <1e-4 | s1r1444 | G0:0015291 | <1e-4 | ssr7084 | G0:0044424 | <1e-4 | s1r1762 | G0:0006259 | 0.02   |
| s110861 | G0:0072522 | <1e-4 | s110788 | G0:0016054 | <1e-4 | s110249 | G0:0042623 | <1e-4 | s110584 | G0:0005575 | <1e-4 | s1r1303 | G0:0006259 | 0.02   |
| s110481 | G0:0044106 | <1e-4 | s111527 | G0:0055082 | <1e-4 | s1r6101 | G0:0022836 | <1e-4 | s1r0517 | G0:0044464 | <1e-4 | s1r7024 | G0:0006259 | 0.02   |
| ssl2781 | G0:0051171 | <1e-4 | s1r1813 | G0:0048878 | <1e-4 | ssr7035 | G0:0015267 | <1e-4 | s1r1474 | G0:0044464 | <1e-4 | s1r0815 | G0:0006259 | 0.02   |
| s1r0157 | G0:0065007 | <1e-4 | s1r0325 | G0:0009132 | <1e-4 | s1r0907 | G0:0022891 | <1e-4 | s1r1593 | G0:0044446 | <1e-4 | s1r1071 | G0:0006259 | 0.02   |
| s1r1222 | G0:0009132 | <1e-4 | ssr1558 | G0:0006721 | <1e-4 | s111634 | G0:0016741 | <1e-4 | s110853 | G0:0044464 | <1e-4 | ss10483 | G0:0006259 | 0.02   |
| s111359 | G0:0072522 | <1e-4 | s1r7092 | G0:0048878 | <1e-4 | s110335 | G0:0022832 | <1e-4 | s110310 | G0:0044444 | <1e-4 | s110268 | G0:0006259 | 0.02   |
| s1r1854 | G0:0009165 | <1e-4 | ssl1498 | G0:0009165 | <1e-4 | s110448 | G0:0022832 | <1e-4 | s1r0590 | G0:0044446 | <1e-4 | s110156 | G0:0006259 | 0.02   |
| s111062 | G0:0051246 | <1e-4 | s111252 | G0:0006721 | <1e-4 | ssr6024 | G0:0016462 | <1e-4 | s1r1628 | G0:0044422 | <1e-4 | s110669 | G0:0006259 | 0.02   |
| s115128 | G0:0043549 | <1e-4 | s1r1557 | G0:0005996 | <1e-4 | s1r1613 | G0:0022891 | <1e-4 | s1r0348 | G0:0044422 | <1e-4 | s1r1603 | G0:0016772 | 0.0192 |
| s1r1932 | G0:0008150 | <1e-4 | s111965 | G0:0033013 | <1e-4 | ssr2611 | G0:0043167 | <1e-4 | s1r7098 | G0:0044464 | <1e-4 | s111737 | G0:0016772 | 0.0192 |
| s110149 | G0:0006733 | <1e-4 | s110532 | G0:0006721 | <1e-4 | s1r1066 | G0:0016818 | <1e-4 | ssr5117 | G0:0044424 | <1e-4 | s1r5112 | G0:0016772 | 0.019  |
| s1r6066 | G0:0052111 | <1e-4 | ssr5074 | G0:0051818 | <1e-4 | s110584 | G0:0003674 | <1e-4 | s1r1188 | G0:0044425 | <1e-4 | ss15108 | G0:0016772 | 0.019  |
| s1r1699 | G0:0044260 | <1e-4 | s111611 | G0:0051188 | <1e-4 | s110325 | G0:0016741 | <1e-4 | s1r0334 | G0:0044422 | <1e-4 | s111388 | G0:0016772 | 0.019  |
| s111737 | G0:0009117 | <1e-4 | s1r7015 | G0:0072524 | <1e-4 | s1r1704 | G0:0016817 | <1e-4 | s111222 | G0:0043226 | <1e-4 | ssr6099 | G0:0016772 | 0.019  |
| s111717 | G0:0052188 | <1e-4 | s111388 | G0:0031326 | <1e-4 | s111217 | G0:0016462 | <1e-4 | s1r0871 | G0:0044422 | <1e-4 | s110372 | G0:0016772 | 0.019  |
| s110410 | G0:0050789 | <1e-4 | s1r0712 | G0:0006811 | <1e-4 | s1r8022 | G0:0022891 | <1e-4 | s1r1179 | G0:0044444 | <1e-4 | s1r0334 | G0:0016772 | 0.019  |
| s110602 | G0:0009199 | <1e-4 | s116052 | G0:0043170 | <1e-4 | s1r6009 | G0:0015293 | <1e-4 | s1r6047 | G0:0044464 | <1e-4 | s115132 | G0:0016772 | 0.019  |
| s1r1614 | G0:0043933 | <1e-4 | s1r1864 | G0:0019751 | <1e-4 | s1r1303 | G0:0016818 | <1e-4 | s111372 | G0:0005575 | <1e-4 | s1r1990 | G0:0016772 | 0.019  |
| ssl2384 | G0:0006220 | <1e-4 | s1r7060 | G0:0009262 | <1e-4 | s110532 | G0:0016818 | <1e-4 | s111643 | G0:0044425 | <1e-4 | s1r0816 | G0:0016772 | 0.019  |
| ssr2972 | G0:0006163 | <1e-4 | ssl2471 | G0:0006733 | <1e-4 | s1r1069 | G0:0016746 | <1e-4 | s1r1847 | G0:0044446 | <1e-4 | ss17021 | G0:0016772 | 0.019  |
| ssr1114 | G0:0009124 | <1e-4 | s110518 | G0:0045184 | <1e-4 | s110010 | G0:0022836 | <1e-4 | ssr3467 | G0:0044446 | <1e-4 | s111915 | G0:0016772 | 0.019  |
| s1r0975 | G0:0045184 | <1e-4 | s1r0554 | G0:0009893 | <1e-4 | ss15065 | G0:0005342 | <1e-4 | s110360 | G0:0005575 | <1e-4 | ss17042 | G0:0016772 | 0.019  |
| s110925 | G0:0019637 | <1e-4 | s1r1394 | G0:0009124 | <1e-4 | s110487 | G0:0015077 | <1e-4 | s1r1429 | G0:0043226 | <1e-4 | ss16061 | G0:0016772 | 0.019  |
| s1r6106 | G0:0071841 | <1e-4 | s1r1863 | G0:0016053 | <1e-4 | s1r1207 | G0:0008171 | <1e-4 | s117090 | G0:0044422 | <1e-4 | s115063 | G0:0016772 | 0.019  |
| s110858 | G0:0044275 | <1e-4 | s1r7013 | G0:0042180 | <1e-4 | s111166 | G0:0043492 | <1e-4 | s110793 | G0:0044425 | <1e-4 | s118035 | G0:0016772 | 0.019  |
| s110208 | G0:0009259 | <1e-4 | s110225 | G0:0008150 | <1e-4 | s1r2111 | G0:0015291 | <1e-4 | s1r1474 | G0:0043226 | <1e-4 | s1r0271 | G0:0016772 | 0.019  |
| s1r6005 | G0:0010468 | <1e-4 | s1r0157 | G0:0006793 | <1e-4 | s1r1365 | G0:0022836 | <1e-4 | s110497 | G0:0043226 | <1e-4 | s110552 | G0:0016772 | 0.019  |
| s110188 | G0:0031323 | <1e-4 | s111218 | G0:0044281 | <1e-4 | s110498 | G0:0003674 | <1e-4 | s111040 | G0:0044424 | <1e-4 | ss16092 | G0:0016772 | 0.019  |
| ss18005 | G0:0042180 | <1e-4 | s111289 | G0:0009161 | <1e-4 | s1r2092 | G0:0015077 | <1e-4 | ss17046 | G0:0044422 | <1e-4 | s1r7060 | G0:0016772 | 0.019  |
| s1r0651 | G0:0031323 | <1e-4 | s1r0243 | G0:0006082 | <1e-4 | s110218 | G0:0015075 | <1e-4 | s1r1442 | G0:0044444 | <1e-4 | s111068 | G0:0016772 | 0.019  |
| s1r1951 | G0:0009987 | <1e-4 | s118011 | G0:0060255 | <1e-4 | s1r6051 | G0:0022838 | <1e-4 | s1r0341 | G0:0044425 | <1e-4 | ssr6086 | G0:0016772 | 0.019  |
| s1r1194 | G0:0042451 | <1e-4 | ssr2551 | G0:0009141 | <1e-4 | s1r2073 | G0:0016818 | <1e-4 | ss11552 | G0:0044422 | <1e-4 | s1r1290 | G0:0016772 | 0.019  |
| s1r1222 | G0:0072522 | <1e-4 | s110168 | G0:0009056 | <1e-4 | ss12384 | G0:0022891 | <1e-4 | s1r1384 | G0:0044464 | <1e-4 | s110162 | G0:0016772 | 0.019  |
| ssr2962 | G0:0042451 | <1e-4 | s1r1117 | G0:0072524 | <1e-4 | ssr2611 | G0:0016818 | <1e-4 | ssr3572 | G0:0044422 | <1e-4 | s111714 | G0:0016772 | 0.019  |
| s1r1260 | G0:0071840 | <1e-4 | s110839 | G0:0009144 | <1e-4 | ss10832 | G0:0022803 | <1e-4 | s1r6101 | G0:0005575 | <1e-4 | s1r0082 | G0:0016772 | 0.019  |
| s1r0398 | G0:0051188 | <1e-4 | s117028 | G0:0051186 | <1e-4 | s1r1913 | G0:0043492 | <1e-4 | s111132 | G0:0044444 | <1e-4 | s1r0645 | G0:0016772 | 0.019  |
| s1r2049 | G0:0009057 | <1e-4 | s110350 | G0:0072524 | <1e-4 | s111681 | G0:0022832 | <1e-4 | s110860 | G0:0044424 | <1e-4 | ssr6024 | G0:0016772 | 0.019  |
| s110216 | G0:0031326 | <1e-4 | s111730 | G0:0019751 | <1e-4 | s1r1196 | G0:0015405 | <1e-4 | s1r0345 | G0:0043226 | <1e-4 | s1r6081 | G0:0016772 | 0.019  |
| s1r6067 | G0:0016054 | <1e-4 | ssr6086 | G0:0072521 | <1e-4 | s111761 | G0:0042623 | <1e-4 | s1r1033 | G0:0044422 | <1e-4 | ss17048 | G0:0016772 | 0.019  |
| s117064 | G0:0046128 | <1e-4 | ss10787 | G0:0009394 | <1e-4 | s111766 | G0:0015291 | <1e-4 | s111318 | G0:0044424 | <1e-4 | ssr6062 | G0:0016772 | 0.019  |
| s110071 | G0:0044283 | <1e-4 | s110641 | G0:0005976 | <1e-4 | s111764 | G0:0022836 | <1e-4 | s1r2037 | G0:0044424 | <1e-4 | ss18028 | G0:0016772 | 0.019  |
| s1r0157 | G0:0033013 | <1e-4 | ssr2554 | G0:0048519 | <1e-4 | ssr3570 | G0:0043167 | <1e-4 | s111389 | G0:0043226 | <1e-4 | s1r5111 | G0:0016772 | 0.019  |
| ssl1923 | G0:0001932 | <1e-4 | s1r1577 | G0:0006163 | <1e-4 | s115003 | G0:0022892 | <1e-4 | s1r0771 | G0:0005575 | <1e-4 | s110044 | G0:0016772 | 0.019  |
| s110328 | G0:0019362 | <1e-4 | s110802 | G0:0034660 | <1e-4 | s1r2084 | G0:0022836 | <1e-4 | s110314 | G0:0044446 | <1e-4 | s1r7102 | G0:0016772 | 0.019  |
| s1r7059 | G0:0043412 | <1e-4 | s110410 | G0:0072524 | <1e-4 | s117062 | G0:0043167 | <1e-4 | ss15108 | G0:0044444 | <1e-4 | s111531 | G0:0016772 | 0.019  |
| s1r0431 | G0:0009161 | <1e-4 | s110096 | G0:0044281 | <1e-4 | s1r1854 | G0:0016818 | <1e-4 | s110354 | G0:0044424 | <1e-4 | s110098 | G0:0016772 | 0.019  |
| s110676 | G0:0042451 | <1e-4 | s117066 | G0:0006163 | <1e-4 | s111254 | G0:0016746 | <1e-4 | s115004 | G0:0044424 | <1e-4 | ssr7079 | G0:0016772 | 0.019  |
| s1r0924 | G0:0034654 | <1e-4 | s111659 | G0:0044255 | <1e-4 | s1r1495 | G0:0022838 | <1e-4 | s111671 | G0:0043226 | <1e-4 | s115089 | G0:0016772 | 0.019  |
| s110147 | G0:0043412 | <1e-4 | ss10738 | G0:0090304 | <1e-4 | s110062 | G0:0005342 | <1e-4 | s111021 | G0:0044464 | <1e-4 | s1r1789 | G0:0016772 | 0.019  |
| ssr1552 | G0:0009132 | <1e-4 | s1r0386 | G0:0044281 | <1e-4 | s1r1788 | G0:0015399 | <1e-4 | s110267 | G0:0044424 | <1e-4 | s1r0181 | G0:0016772 | 0.019  |
| ssl1577 | G0:0051171 | <1e-4 | ssr6026 | G0:0044271 | <1e-4 | s1r6087 | G0:0003674 | <1e-4 | ssl2471 | G0:0044464 | <1e-4 | s1r7094 | G0:0016772 | 0.019  |

|          |            |       |          |            |       |          |            |       |          |            |       |          |            |       |
|----------|------------|-------|----------|------------|-------|----------|------------|-------|----------|------------|-------|----------|------------|-------|
| slr6031  | G0:0006091 | <1e-4 | ssr8013  | G0:0009991 | <1e-4 | slr0634  | G0:0022891 | <1e-4 | sl10280  | G0:0044425 | <1e-4 | slr0637  | G0:0016772 | 0.019 |
| slr0337  | G0:0043412 | <1e-4 | slr1095  | G0:0009124 | <1e-4 | slr0590  | G0:0005342 | <1e-4 | sl11835  | G0:0044464 | <1e-4 | sl11681  | G0:0016772 | 0.019 |
| sl11350  | G0:0072528 | <1e-4 | sl110860 | G0:0042180 | <1e-4 | ssr6026  | G0:0022890 | <1e-4 | slr1875  | G0:0005575 | <1e-4 | slr0509  | G0:0016772 | 0.019 |
| sl110047 | G0:0009126 | <1e-4 | slr1462  | G0:0019362 | <1e-4 | slr0503  | G0:0015291 | <1e-4 | sl110606 | G0:0044446 | <1e-4 | ssr6030  | G0:0016772 | 0.019 |
| slr1815  | G0:0010556 | <1e-4 | slr0184  | G0:0009308 | <1e-4 | sl115097 | G0:0003674 | <1e-4 | slr0948  | G0:0043226 | <1e-4 | sl11891  | G0:0016772 | 0.019 |
| sl110780 | G0:0044283 | <1e-4 | slr1052  | G0:0009987 | <1e-4 | slr1170  | G0:0015399 | <1e-4 | slr0179  | G0:0005575 | <1e-4 | sl11164  | G0:0016772 | 0.019 |
| slr0147  | G0:0080090 | <1e-4 | sl11698  | G0:0050801 | <1e-4 | sl110394 | G0:0022857 | <1e-4 | slr1438  | G0:0044444 | <1e-4 | sl11486  | G0:0016772 | 0.019 |
| sl110735 | G0:0051188 | <1e-4 | slr1816  | G0:0031323 | <1e-4 | sl11898  | G0:0016741 | <1e-4 | ss18039  | G0:0044444 | <1e-4 | ssr2975  | G0:0016772 | 0.019 |
| ssr3572  | G0:0051716 | <1e-4 | sl12015  | G0:0006082 | <1e-4 | sl11155  | G0:0043492 | <1e-4 | slr1261  | G0:0044444 | <1e-4 | slr0498  | G0:0016772 | 0.019 |
| sl110007 | G0:0008150 | <1e-4 | sl110732 | G0:0046128 | <1e-4 | sl111092 | G0:0016746 | <1e-4 | ssr2049  | G0:0043226 | <1e-4 | slr0613  | G0:0016772 | 0.019 |
| ssr0761  | G0:0048518 | <1e-4 | sl110543 | G0:0052188 | <1e-4 | slr0362  | G0:0022892 | <1e-4 | slr1425  | G0:0044444 | <1e-4 | ssr7084  | G0:0016772 | 0.019 |
| slr0863  | G0:0051179 | <1e-4 | slr0865  | G0:0009165 | <1e-4 | sl111797 | G0:0003674 | <1e-4 | sl110350 | G0:0005575 | <1e-4 | ssr0336  | G0:0016772 | 0.019 |
| slr0358  | G0:0046483 | <1e-4 | slr0300  | G0:0034654 | <1e-4 | ss12138  | G0:0015399 | <1e-4 | sl110997 | G0:0044424 | <1e-4 | sl110479 | G0:0016772 | 0.019 |
| slr1301  | G0:0009893 | <1e-4 | ssr8047  | G0:0006720 | <1e-4 | slr6049  | G0:0022803 | <1e-4 | slr6005  | G0:0043226 | <1e-4 | slr8022  | G0:0016772 | 0.019 |
| slr0876  | G0:0060255 | <1e-4 | slr0645  | G0:0009123 | <1e-4 | slr0468  | G0:0003674 | <1e-4 | sl12015  | G0:0044424 | <1e-4 | slr0634  | G0:0016772 | 0.019 |
| slr5018  | G0:0019751 | <1e-4 | sl110413 | G0:0006091 | <1e-4 | sl111265 | G0:0015291 | <1e-4 | sl11355  | G0:0044422 | <1e-4 | sl11832  | G0:0016772 | 0.019 |
| slr1915  | G0:0065007 | <1e-4 | slr0204  | G0:0009126 | <1e-4 | slr0196  | G0:0043167 | <1e-4 | slr0870  | G0:0005575 | <1e-4 | ssr0109  | G0:0016772 | 0.019 |
| slr0667  | G0:0045184 | <1e-4 | slr1906  | G0:0051716 | <1e-4 | sl11188  | G0:0016462 | <1e-4 | sl115047 | G0:0043226 | <1e-4 | slr1935  | G0:0016772 | 0.019 |
| sl11267  | G0:0006066 | <1e-4 | sl11272  | G0:0044281 | <1e-4 | ss10832  | G0:0003674 | <1e-4 | sl11307  | G0:0044444 | <1e-4 | slr6016  | G0:0016772 | 0.019 |
| ssr5020  | G0:0071554 | <1e-4 | slr1636  | G0:0006220 | <1e-4 | ssr2047  | G0:0016818 | <1e-4 | slr0722  | G0:0044422 | <1e-4 | slr0291  | G0:0016772 | 0.019 |
| sl110488 | G0:0071840 | <1e-4 | ss11923  | G0:0009150 | <1e-4 | ss11255  | G0:0022857 | <1e-4 | sl110445 | G0:0044446 | <1e-4 | ss13573  | G0:0016772 | 0.019 |
| slr5111  | G0:0072528 | <1e-4 | ss17007  | G0:0052111 | <1e-4 | slr6044  | G0:0015075 | <1e-4 | ss13383  | G0:0043226 | <1e-4 | slr7071  | G0:0016772 | 0.019 |
| sl110545 | G0:0019362 | <1e-4 | ss15114  | G0:0006220 | <1e-4 | slr1789  | G0:0015293 | <1e-4 | slr0468  | G0:0044464 | <1e-4 | slr5013  | G0:0016772 | 0.019 |
| sl11862  | G0:0044106 | <1e-4 | slr0273  | G0:0009893 | <1e-4 | sl11898  | G0:0015291 | <1e-4 | slr1885  | G0:0044446 | <1e-4 | slr0728  | G0:0016772 | 0.019 |
| slr0865  | G0:0071841 | <1e-4 | sl11442  | G0:0019222 | <1e-4 | sl11979  | G0:0022891 | <1e-4 | slr1926  | G0:0043226 | <1e-4 | slr1915  | G0:0016772 | 0.019 |
| slr1425  | G0:0010468 | <1e-4 | slr0575  | G0:0042451 | <1e-4 | slr1827  | G0:0022803 | <1e-4 | ss17074  | G0:0044422 | <1e-4 | slr2117  | G0:0016772 | 0.019 |
| sl110811 | G0:0090304 | <1e-4 | slr0149  | G0:0043549 | <1e-4 | sl115003 | G0:0016746 | <1e-4 | slr6063  | G0:0044464 | <1e-4 | slr0521  | G0:0016772 | 0.019 |
| ss12064  | G0:0051716 | <1e-4 | sl115030 | G0:0046907 | <1e-4 | sl110218 | G0:0043167 | <1e-4 | slr1101  | G0:0043226 | <1e-4 | ss17022  | G0:0016772 | 0.019 |
| sl11925  | G0:0009124 | <1e-4 | slr0890  | G0:0051188 | <1e-4 | sl11285  | G0:0043167 | <1e-4 | sl11251  | G0:0043226 | <1e-4 | sl110442 | G0:0016772 | 0.019 |
| ssr3410  | G0:0042455 | <1e-4 | slr1865  | G0:0051186 | <1e-4 | sl11652  | G0:0016817 | <1e-4 | sl110268 | G0:0044444 | <1e-4 | slr0813  | G0:0016772 | 0.019 |
| sl110525 | G0:0019637 | <1e-4 | sl110645 | G0:0071840 | <1e-4 | slr1444  | G0:0043492 | <1e-4 | sl110369 | G0:0044444 | <1e-4 | slr0610  | G0:0016772 | 0.019 |
| ssr6048  | G0:0008610 | <1e-4 | sl110867 | G0:0050794 | <1e-4 | slr1852  | G0:0016741 | <1e-4 | slr1047  | G0:0044424 | <1e-4 | ss16035  | G0:0016772 | 0.019 |
| sl11954  | G0:0051186 | <1e-4 | slr0729  | G0:0055086 | <1e-4 | slr6080  | G0:0003674 | <1e-4 | slr7057  | G0:0044425 | <1e-4 | sl11583  | G0:0016772 | 0.019 |
| slr1624  | G0:0009144 | <1e-4 | sl110188 | G0:0006720 | <1e-4 | sl11510  | G0:0016818 | <1e-4 | ssr5020  | G0:0044424 | <1e-4 | sl110327 | G0:0016772 | 0.019 |
| sl118002 | G0:0052111 | <1e-4 | sl110732 | G0:0031640 | <1e-4 | ssr2009  | G0:0022836 | <1e-4 | slr1616  | G0:0005575 | <1e-4 | slr2003  | G0:0016772 | 0.019 |
| sl110241 | G0:0019222 | <1e-4 | slr0962  | G0:0052111 | <1e-4 | ssr7035  | G0:0022891 | <1e-4 | slr1365  | G0:0005575 | <1e-4 | sl18001  | G0:0016772 | 0.019 |
| sl118032 | G0:0045184 | <1e-4 | slr0345  | G0:0019222 | <1e-4 | sl110189 | G0:0016817 | <1e-4 | slr1378  | G0:0044425 | <1e-4 | slr1173  | G0:0016772 | 0.019 |
| sl110505 | G0:0034654 | <1e-4 | slr6075  | G0:0044275 | <1e-4 | sl110445 | G0:0022891 | <1e-4 | sl110810 | G0:0044446 | <1e-4 | sl12011  | G0:0016772 | 0.019 |
| sl111106 | G0:0050896 | <1e-4 | sl111763 | G0:0009117 | <1e-4 | sl110096 | G0:0022832 | <1e-4 | slr0698  | G0:0044444 | <1e-4 | slr1513  | G0:0016772 | 0.019 |
| slr1907  | G0:0006576 | <1e-4 | slr0108  | G0:0071496 | <1e-4 | sl11858  | G0:0022892 | <1e-4 | sl110886 | G0:0044424 | <1e-4 | slr5077  | G0:0016772 | 0.019 |
| ssr2754  | G0:0008610 | <1e-4 | slr5087  | G0:0051347 | <1e-4 | sl110414 | G0:0060089 | <1e-4 | slr0907  | G0:0044444 | <1e-4 | slr6106  | G0:0016772 | 0.019 |
| slr1196  | G0:0034654 | <1e-4 | sl110751 | G0:0009987 | <1e-4 | sl11232  | G0:0015267 | <1e-4 | slr1207  | G0:0043226 | <1e-4 | slr6088  | G0:0016772 | 0.019 |
| slr0326  | G0:0006631 | <1e-4 | ssr6079  | G0:0009123 | <1e-4 | ss10738  | G0:0042623 | <1e-4 | slr6063  | G0:0005575 | <1e-4 | ss12595  | G0:0016772 | 0.019 |
| ssr1698  | G0:0051234 | <1e-4 | sl110361 | G0:0009124 | <1e-4 | sl110177 | G0:0022832 | <1e-4 | sl110863 | G0:0043226 | <1e-4 | ssr7017  | G0:0016772 | 0.019 |
| sl110847 | G0:0044003 | <1e-4 | slr0769  | G0:0046128 | <1e-4 | sl110321 | G0:0015075 | <1e-4 | ss10352  | G0:0044424 | <1e-4 | ssr0761  | G0:0016772 | 0.019 |
| slr0976  | G0:0019752 | <1e-4 | slr2018  | G0:0006220 | <1e-4 | sl110230 | G0:0008171 | <1e-4 | sl110549 | G0:0005575 | <1e-4 | slr5037  | G0:0016772 | 0.019 |
| slr1152  | G0:0048522 | <1e-4 | sl110423 | G0:0009124 | <1e-4 | slr0103  | G0:0015075 | <1e-4 | slr0634  | G0:0044464 | <1e-4 | sl110625 | G0:0016772 | 0.019 |
| sl11218  | G0:0009987 | <1e-4 | sl111950 | G0:0006631 | <1e-4 | ssr0759  | G0:0015405 | <1e-4 | sl111995 | G0:0043226 | <1e-4 | ss17007  | G0:0016772 | 0.019 |
| slr1073  | G0:0072524 | <1e-4 | sl110996 | G0:0006753 | <1e-4 | slr2118  | G0:0022857 | <1e-4 | ss15096  | G0:0044422 | <1e-4 | ss12971  | G0:0016772 | 0.019 |
| slr1493  | G0:0072528 | <1e-4 | slr1163  | G0:0019222 | <1e-4 | sl110445 | G0:0005342 | <1e-4 | sl115090 | G0:0044444 | <1e-4 | slr0300  | G0:0016772 | 0.019 |
| ssr5120  | G0:0071554 | <1e-4 | ssr3467  | G0:0006732 | <1e-4 | sl11273  | G0:0022892 | <1e-4 | ss11378  | G0:0044422 | <1e-4 | slr0575  | G0:0016772 | 0.019 |
| sl11965  | G0:0009150 | <1e-4 | slr2070  | G0:0006163 | <1e-4 | sl110837 | G0:0016817 | <1e-4 | sl110068 | G0:0043234 | <1e-4 | slr5102  | G0:0016772 | 0.019 |
| slr0921  | G0:0009141 | <1e-4 | slr7016  | G0:0031640 | <1e-4 | sl110436 | G0:0042623 | <1e-4 | sl111390 | G0:0044464 | <1e-4 | ss15114  | G0:0016772 | 0.019 |
| ss17038  | G0:0071496 | <1e-4 | slr0948  | G0:0019219 | <1e-4 | sl11654  | G0:0003674 | <1e-4 | sl11563  | G0:0044446 | <1e-4 | slr6044  | G0:0016772 | 0.019 |

|          |            |       |          |            |       |          |            |       |          |            |       |          |            |        |
|----------|------------|-------|----------|------------|-------|----------|------------|-------|----------|------------|-------|----------|------------|--------|
| sl10932  | G0:0008610 | <1e-4 | slr1917  | G0:0006811 | <1e-4 | ssr2067  | G0:0015291 | <1e-4 | slr7082  | G0:0043226 | <1e-4 | sl11285  | G0:0016772 | 0.019  |
| sl11583  | G0:0051234 | <1e-4 | slr0815  | G0:0006811 | <1e-4 | slr2049  | G0:0016818 | <1e-4 | sl11477  | G0:0044425 | <1e-4 | ssr2553  | G0:0016772 | 0.019  |
| sl11250  | G0:0044260 | <1e-4 | sl110286 | G0:0019751 | <1e-4 | slr0852  | G0:0043167 | <1e-4 | slr1034  | G0:0044424 | <1e-4 | sl11940  | G0:0016772 | 0.019  |
| sl110539 | G0:0052188 | <1e-4 | sl110584 | G0:0009991 | <1e-4 | slr1721  | G0:0022890 | <1e-4 | slr0606  | G0:0043226 | <1e-4 | slr0238  | G0:0016772 | 0.019  |
| sl110496 | G0:0050801 | <1e-4 | ssr2972  | G0:0018130 | <1e-4 | sl110499 | G0:0015075 | <1e-4 | sl110995 | G0:0044446 | <1e-4 | sl110310 | G0:0044237 | 0.0188 |
| slr1667  | G0:0006766 | <1e-4 | slr5037  | G0:0019751 | <1e-4 | slr1530  | G0:0016817 | <1e-4 | slr0476  | G0:0005575 | <1e-4 | ss13291  | G0:0044237 | 0.0188 |
| slr0723  | G0:0005996 | <1e-4 | sl111735 | G0:0008610 | <1e-4 | slr6029  | G0:0022832 | <1e-4 | sl15004  | G0:0005575 | <1e-4 | sl110286 | G0:0044237 | 0.0188 |
| slr1062  | G0:0042180 | <1e-4 | slr1215  | G0:0031640 | <1e-4 | sl110181 | G0:0008171 | <1e-4 | sl110414 | G0:0044464 | <1e-4 | slr0408  | G0:0044237 | 0.0188 |
| slr5024  | G0:0072524 | <1e-4 | slr0195  | G0:0006066 | <1e-4 | slr0789  | G0:0022838 | <1e-4 | sl110482 | G0:0044464 | <1e-4 | ssr1258  | G0:0044237 | 0.0188 |
| sl110609 | G0:0009259 | <1e-4 | slr1053  | G0:0052188 | <1e-4 | slr0816  | G0:0043492 | <1e-4 | slr0199  | G0:0044464 | <1e-4 | slr0848  | G0:0044237 | 0.0188 |
| slr1566  | G0:0009262 | <1e-4 | sl110630 | G0:0071554 | <1e-4 | sl111884 | G0:0042623 | <1e-4 | sl110310 | G0:0044424 | <1e-4 | slr0919  | G0:0044237 | 0.0188 |
| sl11571  | G0:0031640 | <1e-4 | slr0398  | G0:0048522 | <1e-4 | sl116052 | G0:0015267 | <1e-4 | sl110615 | G0:0043226 | <1e-4 | slr2084  | G0:0044237 | 0.0188 |
| sl117090 | G0:0022607 | <1e-4 | slr0594  | G0:0009132 | <1e-4 | slr0913  | G0:0016462 | <1e-4 | sl117077 | G0:0005575 | <1e-4 | sl110269 | G0:0044237 | 0.0188 |
| sl111714 | G0:0006082 | <1e-4 | sl110085 | G0:0042180 | <1e-4 | ss10350  | G0:0022838 | <1e-4 | ss10312  | G0:0044422 | <1e-4 | sl111613 | G0:0008233 | 0.0187 |
| sl110447 | G0:0065007 | <1e-4 | slr7023  | G0:0072524 | <1e-4 | slr1677  | G0:0022838 | <1e-4 | slr1601  | G0:0044422 | <1e-4 | slr0586  | G0:0008233 | 0.0187 |
| slr1875  | G0:0009262 | <1e-4 | ssr3129  | G0:0009126 | <1e-4 | slr2004  | G0:0022857 | <1e-4 | sl111160 | G0:0005575 | <1e-4 | slr1081  | G0:0008233 | 0.0187 |
| sl110424 | G0:0009132 | <1e-4 | sl110513 | G0:0009141 | <1e-4 | sl110423 | G0:0008171 | <1e-4 | slr0108  | G0:0005575 | <1e-4 | sl110280 | G0:0008233 | 0.0187 |
| sl111217 | G0:0009893 | <1e-4 | slr1964  | G0:0010468 | <1e-4 | sl111541 | G0:0008171 | <1e-4 | sl111884 | G0:0044446 | <1e-4 | sl111262 | G0:0008233 | 0.0187 |
| sl111749 | G0:0055114 | <1e-4 | slr1907  | G0:0009142 | <1e-4 | slr0545  | G0:0015405 | <1e-4 | ss15045  | G0:0005575 | <1e-4 | slr1778  | G0:0008233 | 0.0187 |
| slr0552  | G0:0009987 | <1e-4 | slr0304  | G0:0006793 | <1e-4 | slr1811  | G0:0022836 | <1e-4 | ssr0336  | G0:0044422 | <1e-4 | slr0392  | G0:0008233 | 0.0187 |
| slr6012  | G0:0006766 | <1e-4 | slr1177  | G0:0008150 | <1e-4 | ss11263  | G0:0022838 | <1e-4 | sl110785 | G0:0044422 | <1e-4 | sl110198 | G0:0008233 | 0.0187 |
| sl110910 | G0:0009991 | <1e-4 | sl117069 | G0:0034660 | <1e-4 | sl110532 | G0:0022838 | <1e-4 | slr1855  | G0:0005575 | <1e-4 | sl110314 | G0:0008233 | 0.0187 |
| slr0930  | G0:0072527 | <1e-4 | slr0601  | G0:0071842 | <1e-4 | sl110743 | G0:0022891 | <1e-4 | slr0294  | G0:0043226 | <1e-4 | slr2121  | G0:0008233 | 0.0187 |
| slr5119  | G0:0048523 | <1e-4 | slr1809  | G0:0042455 | <1e-4 | slr1568  | G0:0015075 | <1e-4 | sl110428 | G0:0044422 | <1e-4 | slr1262  | G0:0008233 | 0.0187 |
| slr0668  | G0:0006066 | <1e-4 | sl110253 | G0:0001932 | <1e-4 | ssr2142  | G0:0022836 | <1e-4 | sl111638 | G0:0044425 | <1e-4 | ss12807  | G0:0008233 | 0.0187 |
| sl110406 | G0:0048522 | <1e-4 | sl110400 | G0:0009117 | <1e-4 | sl111424 | G0:0015405 | <1e-4 | slr1396  | G0:0044422 | <1e-4 | ssr2787  | G0:0008233 | 0.0187 |
| slr0376  | G0:0001932 | <1e-4 | slr1886  | G0:0051188 | <1e-4 | slr0112  | G0:0060089 | <1e-4 | sl110691 | G0:0044424 | <1e-4 | slr1084  | G0:0008233 | 0.0187 |
| ssr2142  | G0:0034641 | <1e-4 | slr1886  | G0:0009124 | <1e-4 | slr1507  | G0:0008171 | <1e-4 | sl110930 | G0:0044444 | <1e-4 | slr0845  | G0:0008233 | 0.0187 |
| ss12384  | G0:0006811 | <1e-4 | sl111902 | G0:0009141 | <1e-4 | slr1186  | G0:0022892 | <1e-4 | sl111671 | G0:0044425 | <1e-4 | slr0144  | G0:0008233 | 0.0187 |
| ssr2009  | G0:0033013 | <1e-4 | sl110588 | G0:0019752 | <1e-4 | slr6065  | G0:0003674 | <1e-4 | slr1098  | G0:0044446 | <1e-4 | sl110524 | G0:0008233 | 0.0187 |
| slr0416  | G0:0055114 | <1e-4 | sl111913 | G0:0044248 | <1e-4 | sl110176 | G0:0015405 | <1e-4 | slr6106  | G0:0005575 | <1e-4 | slr0103  | G0:0008233 | 0.0187 |
| sl111757 | G0:0009308 | <1e-4 | sl110160 | G0:0060255 | <1e-4 | sl111949 | G0:0015293 | <1e-4 | slr6071  | G0:0044444 | <1e-4 | sl110645 | G0:0008233 | 0.0187 |
| slr1628  | G0:0006811 | <1e-4 | ssr0761  | G0:0046128 | <1e-4 | sl110167 | G0:0016818 | <1e-4 | slr7026  | G0:0043226 | <1e-4 | slr1667  | G0:0008233 | 0.0187 |
| sl111002 | G0:0009056 | <1e-4 | ss10312  | G0:0006766 | <1e-4 | slr1074  | G0:0016818 | <1e-4 | ss17022  | G0:0044446 | <1e-4 | ss10242  | G0:0008233 | 0.0187 |
| slr1648  | G0:0006753 | <1e-4 | slr1958  | G0:0072521 | <1e-4 | ss17007  | G0:0015077 | <1e-4 | sl111166 | G0:0005575 | <1e-4 | slr1530  | G0:0008233 | 0.0187 |
| sl111160 | G0:0019219 | <1e-4 | sl110785 | G0:0051716 | <1e-4 | slr1852  | G0:0015405 | <1e-4 | ss13382  | G0:0005575 | <1e-4 | sl111632 | G0:0008233 | 0.0187 |
| sl110659 | G0:0034660 | <1e-4 | slr1940  | G0:0048518 | <1e-4 | sl110265 | G0:0015291 | <1e-4 | sl111634 | G0:0044444 | <1e-4 | sl110243 | G0:0008233 | 0.0187 |
| ss13291  | G0:0042455 | <1e-4 | slr0325  | G0:0044260 | <1e-4 | slr0291  | G0:0015405 | <1e-4 | slr0468  | G0:0005575 | <1e-4 | ssr2615  | G0:0008233 | 0.0187 |
| sl111761 | G0:0009132 | <1e-4 | slr0848  | G0:0044106 | <1e-4 | slr7012  | G0:0016817 | <1e-4 | sl111089 | G0:0044464 | <1e-4 | sl111656 | G0:0008233 | 0.0187 |
| sl110361 | G0:0048522 | <1e-4 | sl110827 | G0:0034641 | <1e-4 | slr1790  | G0:0060089 | <1e-4 | sl112007 | G0:0044444 | <1e-4 | slr1964  | G0:0008233 | 0.0187 |
| ss11300  | G0:0065007 | <1e-4 | ssr0332  | G0:0051171 | <1e-4 | sl111095 | G0:0022803 | <1e-4 | sl111006 | G0:0044446 | <1e-4 | sl110944 | G0:0008233 | 0.0187 |
| sl110481 | G0:0072527 | <1e-4 | slr2144  | G0:0051171 | <1e-4 | slr1864  | G0:0015293 | <1e-4 | slr0287  | G0:0044424 | <1e-4 | ss12065  | G0:0008233 | 0.0187 |
| sl11659  | G0:0034641 | <1e-4 | sl110513 | G0:0009124 | <1e-4 | sl110984 | G0:0022836 | <1e-4 | ssr3154  | G0:0005575 | <1e-4 | slr1676  | G0:0008233 | 0.0187 |
| sl117067 | G0:0065007 | <1e-4 | slr2105  | G0:0034660 | <1e-4 | sl110749 | G0:0022832 | <1e-4 | slr6008  | G0:0005575 | <1e-4 | sl110785 | G0:0008233 | 0.0187 |
| sl110243 | G0:0051818 | <1e-4 | sl110925 | G0:0009057 | <1e-4 | sl111528 | G0:0015293 | <1e-4 | slr0552  | G0:0044422 | <1e-4 | sl111949 | G0:0008233 | 0.0187 |
| sg10002  | G0:0051186 | <1e-4 | sl111315 | G0:0044275 | <1e-4 | slr0975  | G0:0042623 | <1e-4 | sl115047 | G0:0005575 | <1e-4 | sl110216 | G0:0008233 | 0.0187 |
| slr1074  | G0:0009260 | <1e-4 | slr0596  | G0:0019362 | <1e-4 | slr0579  | G0:0015075 | <1e-4 | slr0650  | G0:0044424 | <1e-4 | slr0348  | G0:0008233 | 0.0187 |
| ssr2317  | G0:0042180 | <1e-4 | ssr2975  | G0:0009117 | <1e-4 | slr5023  | G0:0016817 | <1e-4 | sl110985 | G0:0044425 | <1e-4 | sl110023 | G0:0008233 | 0.0187 |
| sl111307 | G0:0044260 | <1e-4 | sl117034 | G0:0009987 | <1e-4 | slr0725  | G0:0015291 | <1e-4 | slr6021  | G0:0044464 | <1e-4 | sl111835 | G0:0008233 | 0.0187 |
| sl15004  | G0:0009126 | <1e-4 | sl117090 | G0:0044260 | <1e-4 | slr0442  | G0:0015405 | <1e-4 | slr1462  | G0:0044446 | <1e-4 | slr1932  | G0:0008233 | 0.0187 |
| slr0147  | G0:0009126 | <1e-4 | ssr1528  | G0:0048522 | <1e-4 | slr1990  | G0:0022857 | <1e-4 | sl111321 | G0:0044446 | <1e-4 | sl111608 | G0:0008233 | 0.0187 |
| sl115132 | G0:0009117 | <1e-4 | sl110804 | G0:0006753 | <1e-4 | ss11498  | G0:0022832 | <1e-4 | ssr5019  | G0:0044464 | <1e-4 | sl111830 | G0:0008233 | 0.0187 |
| sl111025 | G0:0010556 | <1e-4 | sl110765 | G0:0043412 | <1e-4 | sl111715 | G0:0022803 | <1e-4 | ss10738  | G0:0044464 | <1e-4 | sl111446 | G0:0016740 | 0.0186 |
| sl110249 | G0:0006631 | <1e-4 | sl110563 | G0:0008610 | <1e-4 | sl111381 | G0:0022838 | <1e-4 | slr1103  | G0:0044446 | <1e-4 | sl110656 | G0:0016740 | 0.0186 |

|         |            |       |         |            |       |         |            |       |         |            |       |         |            |        |
|---------|------------|-------|---------|------------|-------|---------|------------|-------|---------|------------|-------|---------|------------|--------|
| ssr0109 | G0:0072527 | <1e-4 | slr0959 | G0:0055114 | <1e-4 | s110602 | G0:0022803 | <1e-4 | slr0031 | G0:0044425 | <1e-4 | ssr0692 | G0:0016740 | 0.0186 |
| slr0142 | G0:0044003 | <1e-4 | ssr0336 | G0:0009892 | <1e-4 | slr1209 | G0:0022857 | <1e-4 | s111611 | G0:0005575 | <1e-4 | s110944 | G0:0042626 | 0.0185 |
| slr6063 | G0:0043412 | <1e-4 | s111319 | G0:0044281 | <1e-4 | slr7096 | G0:0015293 | <1e-4 | slr5119 | G0:0044464 | <1e-4 | s111442 | G0:0042626 | 0.0185 |
| slr0964 | G0:0072527 | <1e-4 | ssl1378 | G0:0052188 | <1e-4 | ssr3122 | G0:0003674 | <1e-4 | slr0651 | G0:0044422 | <1e-4 | slr0941 | G0:0042626 | 0.0185 |
| slr0250 | G0:0019752 | <1e-4 | s111632 | G0:0060255 | <1e-4 | slr1376 | G0:0022836 | <1e-4 | slr2027 | G0:0044446 | <1e-4 | slr1210 | G0:0042626 | 0.0185 |
| s111054 | G0:0050801 | <1e-4 | ssl6061 | G0:0016052 | <1e-4 | slr1262 | G0:0015405 | <1e-4 | s110744 | G0:0005575 | <1e-4 | s111658 | G0:0042626 | 0.0185 |
| slr1079 | G0:0006631 | <1e-4 | slr7097 | G0:0010468 | <1e-4 | slr1301 | G0:0042623 | <1e-4 | slr0655 | G0:0044446 | <1e-4 | ssr1765 | G0:0042626 | 0.0185 |
| s111289 | G0:0034641 | <1e-4 | slr1535 | G0:0009889 | <1e-4 | slr1110 | G0:0022803 | <1e-4 | ssr3154 | G0:0044464 | <1e-4 | s110325 | G0:0042626 | 0.0185 |
| slr1932 | G0:0065007 | <1e-4 | s111052 | G0:0009259 | <1e-4 | s111531 | G0:0015075 | <1e-4 | slr1415 | G0:0044446 | <1e-4 | s110524 | G0:0042626 | 0.0185 |
| slr6051 | G0:0018130 | <1e-4 | slr2121 | G0:0042455 | <1e-4 | s111053 | G0:0043167 | <1e-4 | s110023 | G0:0005575 | <1e-4 | slr2121 | G0:0042626 | 0.0185 |
| slr2018 | G0:0050801 | <1e-4 | ssl7046 | G0:0044283 | <1e-4 | slr2004 | G0:0005342 | <1e-4 | slr1484 | G0:0005575 | <1e-4 | s111736 | G0:0042626 | 0.0185 |
| s111692 | G0:0018130 | <1e-4 | s110218 | G0:0019752 | <1e-4 | s117034 | G0:0022857 | <1e-4 | s110283 | G0:0044424 | <1e-4 | s110185 | G0:0042626 | 0.0185 |
| slr1071 | G0:0042455 | <1e-4 | s117070 | G0:0006811 | <1e-4 | slr7101 | G0:0015267 | <1e-4 | s111902 | G0:0044425 | <1e-4 | ss12807 | G0:0042626 | 0.0185 |
| slr0651 | G0:0080090 | <1e-4 | s111726 | G0:0006720 | <1e-4 | s111424 | G0:0016746 | <1e-4 | s111429 | G0:0044464 | <1e-4 | s110756 | G0:0042626 | 0.0185 |
| slr0888 | G0:0009132 | <1e-4 | slr0967 | G0:0051171 | <1e-4 | s111757 | G0:0016818 | <1e-4 | ss10739 | G0:0005575 | <1e-4 | s110780 | G0:0042626 | 0.0185 |
| slr0712 | G0:0033013 | <1e-4 | ss18005 | G0:0080090 | <1e-4 | slr1636 | G0:0016817 | <1e-4 | slr0112 | G0:0044422 | <1e-4 | s110309 | G0:0042626 | 0.0185 |
| s111106 | G0:0006163 | <1e-4 | ssr6089 | G0:0010556 | <1e-4 | slr0317 | G0:0015291 | <1e-4 | slr1288 | G0:0044422 | <1e-4 | s110023 | G0:0042626 | 0.0185 |
| slr0581 | G0:0046164 | <1e-4 | slr6072 | G0:0050794 | <1e-4 | slr1206 | G0:0008171 | <1e-4 | s111749 | G0:0005575 | <1e-4 | s111061 | G0:0042626 | 0.0185 |
| ssl1498 | G0:0006066 | <1e-4 | s110853 | G0:0046483 | <1e-4 | s111285 | G0:0022836 | <1e-4 | s110932 | G0:0044425 | <1e-4 | slr1177 | G0:0042626 | 0.0185 |
| slr7097 | G0:0006082 | <1e-4 | s110281 | G0:0019752 | <1e-4 | slr7081 | G0:0022838 | <1e-4 | slr0975 | G0:0043226 | <1e-4 | ssr2615 | G0:0042626 | 0.0185 |
| s110071 | G0:0006766 | <1e-4 | s111583 | G0:0006163 | <1e-4 | slr1914 | G0:0022890 | <1e-4 | s111949 | G0:0044425 | <1e-4 | s111763 | G0:0005515 | 0.0185 |
| s111378 | G0:0048523 | <1e-4 | slr6064 | G0:0009126 | <1e-4 | s110787 | G0:0015267 | <1e-4 | slr1104 | G0:0044464 | <1e-4 | s110350 | G0:0005515 | 0.0185 |
| s110181 | G0:0051818 | <1e-4 | slr0888 | G0:0031640 | <1e-4 | s111773 | G0:0015267 | <1e-4 | s112011 | G0:0043226 | <1e-4 | s111656 | G0:0042626 | 0.0185 |
| slr0060 | G0:0006721 | <1e-4 | s110839 | G0:0016054 | <1e-4 | s110394 | G0:0003674 | <1e-4 | ssr6020 | G0:0005575 | <1e-4 | slr0668 | G0:0042626 | 0.0185 |
| s111135 | G0:0055082 | <1e-4 | slr1307 | G0:0009126 | <1e-4 | s110765 | G0:0060089 | <1e-4 | slr1142 | G0:0044444 | <1e-4 | slr2073 | G0:0042626 | 0.0185 |
| slr0702 | G0:0009150 | <1e-4 | ssr3300 | G0:0034654 | <1e-4 | slr0589 | G0:0008171 | <1e-4 | s110996 | G0:0044422 | <1e-4 | s110355 | G0:0042626 | 0.0185 |
| slr6073 | G0:0009991 | <1e-4 | slr1340 | G0:0043549 | <1e-4 | slr1287 | G0:0008171 | <1e-4 | ssr0335 | G0:0005575 | <1e-4 | s110497 | G0:0042626 | 0.0185 |
| slr0065 | G0:0009117 | <1e-4 | s110545 | G0:0052111 | <1e-4 | s110157 | G0:0022838 | <1e-4 | ss11417 | G0:0043226 | <1e-4 | s110414 | G0:0042626 | 0.0185 |
| s110886 | G0:0006793 | <1e-4 | slr1384 | G0:0031323 | <1e-4 | s110487 | G0:0022836 | <1e-4 | s110208 | G0:0044424 | <1e-4 | slr0386 | G0:0042626 | 0.0185 |
| s111763 | G0:0008150 | <1e-4 | s110676 | G0:0016052 | <1e-4 | s115004 | G0:0042623 | <1e-4 | slr7098 | G0:0043226 | <1e-4 | ssr6079 | G0:0016874 | 0.0184 |
| s110563 | G0:0071496 | <1e-4 | slr1444 | G0:0042180 | <1e-4 | slr1142 | G0:0008171 | <1e-4 | ssr2787 | G0:0044444 | <1e-4 | slr7023 | G0:0016874 | 0.0184 |
| s110853 | G0:0046907 | <1e-4 | s110843 | G0:0006811 | <1e-4 | slr0519 | G0:0015405 | <1e-4 | s111652 | G0:0005575 | <1e-4 | slr1927 | G0:0016874 | 0.0184 |
| ss12245 | G0:0006753 | <1e-4 | ssl1577 | G0:0010468 | <1e-4 | s115128 | G0:0022832 | <1e-4 | ssr2975 | G0:0044444 | <1e-4 | ssr1407 | G0:0016874 | 0.0184 |
| s111835 | G0:0009161 | <1e-4 | slr0304 | G0:0044283 | <1e-4 | slr6080 | G0:0022891 | <1e-4 | ssr6019 | G0:0044425 | <1e-4 | slr0960 | G0:0016874 | 0.0184 |
| s111773 | G0:0042451 | <1e-4 | s110281 | G0:0010468 | <1e-4 | s111389 | G0:0015267 | <1e-4 | slr5073 | G0:0044422 | <1e-4 | slr6074 | G0:0016874 | 0.0184 |
| ssr5120 | G0:0080090 | <1e-4 | slr7060 | G0:0051246 | <1e-4 | slr0195 | G0:0022892 | <1e-4 | s110685 | G0:0043226 | <1e-4 | slr0769 | G0:0016874 | 0.0184 |
| slr7080 | G0:0046164 | <1e-4 | ss15027 | G0:0009057 | <1e-4 | slr1196 | G0:0022891 | <1e-4 | slr0299 | G0:0044464 | <1e-4 | slr1384 | G0:0016874 | 0.0184 |
| s115034 | G0:0009057 | <1e-4 | slr2012 | G0:0051818 | <1e-4 | s111640 | G0:0015267 | <1e-4 | slr7094 | G0:0043226 | <1e-4 | ss11464 | G0:0016874 | 0.0184 |
| slr1958 | G0:0031640 | <1e-4 | s111193 | G0:0046907 | <1e-4 | s118002 | G0:0016741 | <1e-4 | s111130 | G0:0044424 | <1e-4 | s110846 | G0:0016874 | 0.0184 |
| slr1773 | G0:0046907 | <1e-4 | ssr7017 | G0:0009259 | <1e-4 | slr1261 | G0:0008171 | <1e-4 | s110024 | G0:0044464 | <1e-4 | ssr6003 | G0:0016874 | 0.0184 |
| slr1647 | G0:0009991 | <1e-4 | slr0885 | G0:0019222 | <1e-4 | slr0810 | G0:0022838 | <1e-4 | slr0250 | G0:0044425 | <1e-4 | s111651 | G0:0016874 | 0.0184 |
| s111142 | G0:0043412 | <1e-4 | s110191 | G0:0019362 | <1e-4 | ssr1258 | G0:0008171 | <1e-4 | ssr1768 | G0:0044446 | <1e-4 | s111004 | G0:0016874 | 0.0184 |
| slr0483 | G0:0044283 | <1e-4 | s117055 | G0:0006766 | <1e-4 | s110787 | G0:0015405 | <1e-4 | ssr2009 | G0:0044446 | <1e-4 | slr5018 | G0:0016874 | 0.0184 |
| slr7096 | G0:0051171 | <1e-4 | slr0199 | G0:0044255 | <1e-4 | s111400 | G0:0022838 | <1e-4 | s111092 | G0:0044425 | <1e-4 | s111509 | G0:0016874 | 0.0184 |
| slr1230 | G0:0009132 | <1e-4 | slr0582 | G0:0009263 | <1e-4 | ss12384 | G0:0043492 | <1e-4 | slr2010 | G0:0044446 | <1e-4 | slr1660 | G0:0016874 | 0.0184 |
| s110406 | G0:0048518 | <1e-4 | s110875 | G0:0009161 | <1e-4 | s112006 | G0:0016817 | <1e-4 | slr7073 | G0:0044422 | <1e-4 | s111265 | G0:0016874 | 0.0184 |
| slr7023 | G0:0052188 | <1e-4 | slr1340 | G0:0031323 | <1e-4 | slr1266 | G0:0015293 | <1e-4 | slr0885 | G0:0044424 | <1e-4 | ss12920 | G0:0016874 | 0.0184 |
| s110103 | G0:0019222 | <1e-4 | s110843 | G0:0065007 | <1e-4 | slr0610 | G0:0042623 | <1e-4 | slr0601 | G0:0044424 | <1e-4 | slr7081 | G0:0016874 | 0.0184 |
| ss18008 | G0:0006066 | <1e-4 | ssl1923 | G0:0009142 | <1e-4 | s111461 | G0:0015267 | <1e-4 | slr1406 | G0:0044425 | <1e-4 | s111696 | G0:0016874 | 0.0184 |
| ssl7007 | G0:0044271 | <1e-4 | s110397 | G0:0048878 | <1e-4 | slr0356 | G0:0043167 | <1e-4 | slr0695 | G0:0044464 | <1e-4 | slr1306 | G0:0016874 | 0.0184 |
| slr1258 | G0:0009142 | <1e-4 | slr7071 | G0:0010556 | <1e-4 | s111476 | G0:0022857 | <1e-4 | s110645 | G0:0044444 | <1e-4 | slr1546 | G0:0016874 | 0.0184 |
| s111505 | G0:0045184 | <1e-4 | s110505 | G0:0031323 | <1e-4 | s110252 | G0:0022891 | <1e-4 | s110274 | G0:0044446 | <1e-4 | s118007 | G0:0016874 | 0.0184 |
| slr1537 | G0:0010468 | <1e-4 | slr0865 | G0:0006733 | <1e-4 | s111344 | G0:0022890 | <1e-4 | slr0271 | G0:0005575 | <1e-4 | slr1535 | G0:0016874 | 0.0184 |
| slr6090 | G0:0071496 | <1e-4 | slr1444 | G0:0055086 | <1e-4 | s117033 | G0:0015291 | <1e-4 | ss12717 | G0:0044422 | <1e-4 | ssr0335 | G0:0016874 | 0.0184 |

|         |            |       |         |            |       |         |            |       |         |            |       |         |            |        |
|---------|------------|-------|---------|------------|-------|---------|------------|-------|---------|------------|-------|---------|------------|--------|
| slr2052 | G0:0034654 | <1e-4 | slr6087 | G0:0019752 | <1e-4 | sl10727 | G0:0016817 | <1e-4 | ssr1391 | G0:0043226 | <1e-4 | slr0581 | G0:0016874 | 0.0184 |
| sl11247 | G0:0034641 | <1e-4 | slr1813 | G0:0009117 | <1e-4 | slr6101 | G0:0042623 | <1e-4 | slr0990 | G0:0044446 | <1e-4 | slr1619 | G0:0016874 | 0.0184 |
| slr1816 | G0:0050801 | <1e-4 | sl10910 | G0:0006220 | <1e-4 | slr1362 | G0:0016741 | <1e-4 | sl10926 | G0:0044446 | <1e-4 | sl10762 | G0:0016874 | 0.0184 |
| sl10488 | G0:0045184 | <1e-4 | ssl0461 | G0:0005996 | <1e-4 | slr0521 | G0:0015399 | <1e-4 | slr1444 | G0:0005575 | <1e-4 | sl11092 | G0:0016874 | 0.0184 |
| sl11763 | G0:0006082 | <1e-4 | slr0989 | G0:0065007 | <1e-4 | slr7013 | G0:0016746 | <1e-4 | sl10638 | G0:0044464 | <1e-4 | slr6090 | G0:0016874 | 0.0184 |
| sl11455 | G0:0051179 | <1e-4 | slr6101 | G0:0008610 | <1e-4 | sl10372 | G0:0015267 | <1e-4 | slr5116 | G0:0044424 | <1e-4 | slr0971 | G0:0016874 | 0.0184 |
| sl11714 | G0:0043170 | <1e-4 | slr7101 | G0:0050801 | <1e-4 | slr0656 | G0:0016818 | <1e-4 | sl10609 | G0:0044422 | <1e-4 | sl11132 | G0:0016874 | 0.0184 |
| slr0755 | G0:0034641 | <1e-4 | slr1462 | G0:0009987 | <1e-4 | sl11191 | G0:0022836 | <1e-4 | ssr1256 | G0:0005575 | <1e-4 | slr7011 | G0:0016874 | 0.0184 |
| sl10482 | G0:0046164 | <1e-4 | slr6039 | G0:0009259 | <1e-4 | slr1544 | G0:0015077 | <1e-4 | sl11582 | G0:0044464 | <1e-4 | slr6013 | G0:0016874 | 0.0184 |
| slr5053 | G0:0005996 | <1e-4 | slr1262 | G0:0009144 | <1e-4 | sl11318 | G0:0022832 | <1e-4 | sl10775 | G0:0044446 | <1e-4 | ss12717 | G0:0016874 | 0.0184 |
| sl10048 | G0:0031640 | <1e-4 | slr0981 | G0:0006066 | <1e-4 | sl11306 | G0:0016462 | <1e-4 | ss15108 | G0:0044422 | <1e-4 | slr1068 | G0:0016874 | 0.0184 |
| sl10804 | G0:0009259 | <1e-4 | slr0780 | G0:0010556 | <1e-4 | ss12814 | G0:0043167 | <1e-4 | sl10871 | G0:0044422 | <1e-4 | slr1768 | G0:0016874 | 0.0184 |
| slr1677 | G0:0044260 | <1e-4 | sl12015 | G0:0043933 | <1e-4 | ss10738 | G0:0008171 | <1e-4 | sl11916 | G0:0044444 | <1e-4 | sl11130 | G0:0016874 | 0.0184 |
| slr1150 | G0:0009309 | <1e-4 | slr0962 | G0:0051188 | <1e-4 | sl10752 | G0:0022891 | <1e-4 | slr1788 | G0:0005575 | <1e-4 | slr0912 | G0:0016874 | 0.0184 |
| slr0554 | G0:0009991 | <1e-4 | slr1168 | G0:0080090 | <1e-4 | sl11882 | G0:0015267 | <1e-4 | ssr1391 | G0:0005575 | <1e-4 | sl11862 | G0:0016874 | 0.0184 |
| slr1815 | G0:0051347 | <1e-4 | sl11464 | G0:0050789 | <1e-4 | slr1863 | G0:0022891 | <1e-4 | slr1862 | G0:0044464 | <1e-4 | sl10478 | G0:0016874 | 0.0184 |
| sl10503 | G0:0006721 | <1e-4 | slr1690 | G0:0009126 | <1e-4 | sl10572 | G0:0022890 | <1e-4 | slr1788 | G0:0044424 | <1e-4 | ss13383 | G0:0016874 | 0.0184 |
| slr0921 | G0:0009394 | <1e-4 | slr0625 | G0:0009144 | <1e-4 | sl10810 | G0:0016818 | <1e-4 | ss12064 | G0:0044424 | <1e-4 | sl10611 | G0:0016874 | 0.0184 |
| ss17045 | G0:0071842 | <1e-4 | slr1315 | G0:0006720 | <1e-4 | sl15128 | G0:0043492 | <1e-4 | sl11832 | G0:0044422 | <1e-4 | slr2010 | G0:0016874 | 0.0184 |
| sl15063 | G0:0043933 | <1e-4 | sl10780 | G0:0043170 | <1e-4 | sl10497 | G0:0022890 | <1e-4 | ssr2912 | G0:0044422 | <1e-4 | slr6080 | G0:0016874 | 0.0184 |
| slr2101 | G0:0006721 | <1e-4 | sl18012 | G0:0031326 | <1e-4 | slr2092 | G0:0022891 | <1e-4 | slr6106 | G0:0044446 | <1e-4 | slr1657 | G0:0016874 | 0.0184 |
| sl11378 | G0:0009987 | <1e-4 | sl18019 | G0:0009889 | <1e-4 | slr1450 | G0:0015399 | <1e-4 | ssr5019 | G0:0043226 | <1e-4 | slr6005 | G0:0016874 | 0.0184 |
| slr0400 | G0:0044106 | <1e-4 | slr1052 | G0:0010468 | <1e-4 | slr0204 | G0:0022832 | <1e-4 | sl11562 | G0:0044446 | <1e-4 | slr0362 | G0:0016874 | 0.0184 |
| sl11509 | G0:0048878 | <1e-4 | slr0664 | G0:0052111 | <1e-4 | ssr5121 | G0:0016818 | <1e-4 | ssr3341 | G0:0044446 | <1e-4 | slr0388 | G0:0016874 | 0.0184 |
| slr5024 | G0:0071554 | <1e-4 | sl15004 | G0:0006576 | <1e-4 | slr1721 | G0:0016746 | <1e-4 | sl16052 | G0:0044446 | <1e-4 | slr1263 | G0:0016874 | 0.0184 |
| slr5127 | G0:0016053 | <1e-4 | sl11873 | G0:0019362 | <1e-4 | slr6072 | G0:0022838 | <1e-4 | sl10552 | G0:0044464 | <1e-4 | ss11498 | G0:0016874 | 0.0184 |
| slr0740 | G0:0031323 | <1e-4 | sl11455 | G0:0043549 | <1e-4 | slr0505 | G0:0008171 | <1e-4 | sl11188 | G0:0005575 | <1e-4 | sl17043 | G0:0016874 | 0.0184 |
| sl11530 | G0:0009141 | <1e-4 | ssr1155 | G0:0090304 | <1e-4 | sl10756 | G0:0015405 | <1e-4 | ssr6048 | G0:0044425 | <1e-4 | ssr5020 | G0:0016874 | 0.0184 |
| slr6100 | G0:0031323 | <1e-4 | sl10230 | G0:0043933 | <1e-4 | slr2117 | G0:0060089 | <1e-4 | slr1276 | G0:0044422 | <1e-4 | ssr2611 | G0:0016874 | 0.0184 |
| slr0871 | G0:0046128 | <1e-4 | sl12006 | G0:0044106 | <1e-4 | slr0146 | G0:0003674 | <1e-4 | sl18027 | G0:0043226 | <1e-4 | slr0049 | G0:0016874 | 0.0184 |
| sl11217 | G0:0071840 | <1e-4 | sl11472 | G0:0006793 | <1e-4 | sl11773 | G0:0022892 | <1e-4 | sl11898 | G0:0043226 | <1e-4 | ss17046 | G0:0016874 | 0.0184 |
| slr1659 | G0:0071554 | <1e-4 | sl10762 | G0:0044260 | <1e-4 | sl10783 | G0:0042623 | <1e-4 | slr1362 | G0:0044464 | <1e-4 | slr1270 | G0:0016874 | 0.0184 |
| ssr2803 | G0:0051818 | <1e-4 | ssl1255 | G0:0044003 | <1e-4 | slr1704 | G0:0003674 | <1e-4 | slr0181 | G0:0044424 | <1e-4 | slr1362 | G0:0016874 | 0.0184 |
| sl10325 | G0:0006733 | <1e-4 | slr1880 | G0:0048523 | <1e-4 | slr1127 | G0:0015267 | <1e-4 | sl11233 | G0:0044464 | <1e-4 | slr6008 | G0:0016874 | 0.0184 |
| slr0192 | G0:0046394 | <1e-4 | sl18002 | G0:0051234 | <1e-4 | slr0065 | G0:0022836 | <1e-4 | ss12384 | G0:0044425 | <1e-4 | ss11520 | G0:0016874 | 0.0184 |
| sl18004 | G0:0072524 | <1e-4 | sl10423 | G0:0006163 | <1e-4 | sl17047 | G0:0015399 | <1e-4 | sl10853 | G0:0043226 | <1e-4 | slr0907 | G0:0016874 | 0.0184 |
| ss11417 | G0:0046907 | <1e-4 | slr0305 | G0:0044283 | <1e-4 | ss15065 | G0:0022836 | <1e-4 | slr2049 | G0:0005575 | <1e-4 | ss13142 | G0:0016874 | 0.0184 |
| sl10361 | G0:0009117 | <1e-4 | slr1752 | G0:0009123 | <1e-4 | slr0919 | G0:0060089 | <1e-4 | ss13142 | G0:0043226 | <1e-4 | slr1407 | G0:0016874 | 0.0184 |
| slr1431 | G0:0006720 | <1e-4 | ssr3341 | G0:0019219 | <1e-4 | sl11089 | G0:0015293 | <1e-4 | slr0712 | G0:0044424 | <1e-4 | sl15090 | G0:0016874 | 0.0184 |
| slr0789 | G0:0031640 | <1e-4 | sl10008 | G0:0034654 | <1e-4 | slr1812 | G0:0016746 | <1e-4 | ss13382 | G0:0043226 | <1e-4 | sl11447 | G0:0016874 | 0.0184 |
| slr0092 | G0:0052111 | <1e-4 | sl11749 | G0:0050801 | <1e-4 | sl11388 | G0:0022857 | <1e-4 | slr0654 | G0:0044444 | <1e-4 | slr8014 | G0:0016874 | 0.0184 |
| slr6014 | G0:0051186 | <1e-4 | slr1263 | G0:0031640 | <1e-4 | sl11060 | G0:0016741 | <1e-4 | sl11654 | G0:0044422 | <1e-4 | slr1914 | G0:0016874 | 0.0184 |
| slr2144 | G0:0009056 | <1e-4 | sl11638 | G0:0044248 | <1e-4 | sl11262 | G0:0022836 | <1e-4 | slr1920 | G0:0005575 | <1e-4 | sl10775 | G0:0016874 | 0.0184 |
| sl11913 | G0:0022607 | <1e-4 | sl10147 | G0:0018130 | <1e-4 | sl11601 | G0:0022857 | <1e-4 | sl10293 | G0:0043226 | <1e-4 | slr1907 | G0:0016874 | 0.0184 |
| slr0586 | G0:0048519 | <1e-4 | sl10982 | G0:0009987 | <1e-4 | slr1753 | G0:0022857 | <1e-4 | sl10448 | G0:0044425 | <1e-4 | slr0199 | G0:0016874 | 0.0184 |
| sl11455 | G0:0071554 | <1e-4 | ssl2138 | G0:0044271 | <1e-4 | sl11036 | G0:0016818 | <1e-4 | slr0887 | G0:0044444 | <1e-4 | slr0821 | G0:0016874 | 0.0184 |
| sl16052 | G0:0048518 | <1e-4 | slr0919 | G0:0050789 | <1e-4 | slr1102 | G0:0022838 | <1e-4 | ss15068 | G0:0044444 | <1e-4 | sl10802 | G0:0016874 | 0.0184 |
| slr6066 | G0:0031640 | <1e-4 | sl11630 | G0:0034654 | <1e-4 | slr6063 | G0:0015077 | <1e-4 | slr1660 | G0:0044425 | <1e-4 | sl11396 | G0:0016874 | 0.0184 |
| slr0157 | G0:0009892 | <1e-4 | ss10739 | G0:0048519 | <1e-4 | slr1875 | G0:0022891 | <1e-4 | ssr2975 | G0:0044422 | <1e-4 | ssr3410 | G0:0016874 | 0.0184 |
| sl10763 | G0:0006811 | <1e-4 | slr1648 | G0:0006576 | <1e-4 | slr0645 | G0:0015267 | <1e-4 | ss17022 | G0:0044424 | <1e-4 | slr1464 | G0:0016874 | 0.0184 |
| slr1230 | G0:0009150 | <1e-4 | slr1612 | G0:0009144 | <1e-4 | sl11873 | G0:0015077 | <1e-4 | slr0876 | G0:0005575 | <1e-4 | sl10419 | G0:0016874 | 0.0184 |
| slr1914 | G0:0044271 | <1e-4 | slr7092 | G0:0006720 | <1e-4 | slr0479 | G0:0016818 | <1e-4 | sl12011 | G0:0044464 | <1e-4 | slr0489 | G0:0016874 | 0.0184 |
| sl11749 | G0:0019222 | <1e-4 | sl10513 | G0:0009892 | <1e-4 | sl11797 | G0:0016746 | <1e-4 | slr0885 | G0:0044446 | <1e-4 | sl17066 | G0:0016874 | 0.0184 |
| ss15015 | G0:0009394 | <1e-4 | ss10738 | G0:0034660 | <1e-4 | slr0006 | G0:0015075 | <1e-4 | slr5119 | G0:0005575 | <1e-4 | slr0606 | G0:0016874 | 0.0184 |

|         |            |       |         |            |       |         |            |       |         |            |       |         |            |        |
|---------|------------|-------|---------|------------|-------|---------|------------|-------|---------|------------|-------|---------|------------|--------|
| ssl3573 | G0:0051171 | <1e-4 | slr1188 | G0:0009259 | <1e-4 | sl10858 | G0:0015405 | <1e-4 | slr1383 | G0:0044444 | <1e-4 | ssr2317 | G0:0016874 | 0.0184 |
| sl16053 | G0:0051818 | <1e-4 | slr1944 | G0:0018130 | <1e-4 | slr0975 | G0:0022836 | <1e-4 | sl11613 | G0:0044464 | <1e-4 | slr7092 | G0:0016874 | 0.0184 |
| sl10760 | G0:0051179 | <1e-4 | ssl7048 | G0:0044106 | <1e-4 | sl10319 | G0:0043167 | <1e-4 | slr2070 | G0:0044422 | <1e-4 | slr5119 | G0:0016874 | 0.0184 |
| ssr2067 | G0:0065007 | <1e-4 | slr0519 | G0:0006733 | <1e-4 | slr1070 | G0:0016746 | <1e-4 | slr1327 | G0:0044446 | <1e-4 | slr7013 | G0:0016874 | 0.0184 |
| slr1827 | G0:0009263 | <1e-4 | slr0142 | G0:0046394 | <1e-4 | slr2049 | G0:0015075 | <1e-4 | slr5018 | G0:0044446 | <1e-4 | slr1677 | G0:0016874 | 0.0184 |
| sl10442 | G0:0006721 | <1e-4 | slr1189 | G0:0048522 | <1e-4 | sl11783 | G0:0022832 | <1e-4 | ss10750 | G0:0043226 | <1e-4 | slr6004 | G0:0016874 | 0.0184 |
| sl10647 | G0:0051179 | <1e-4 | slr7092 | G0:0044283 | <1e-4 | slr1339 | G0:0015293 | <1e-4 | sl10625 | G0:0005575 | <1e-4 | sl11921 | G0:0016874 | 0.0184 |
| sl11542 | G0:0044003 | <1e-4 | slr1591 | G0:0006631 | <1e-4 | sl11004 | G0:0043492 | <1e-4 | slr0551 | G0:0044424 | <1e-4 | sl10487 | G0:0016874 | 0.0184 |
| sl10867 | G0:0016054 | <1e-4 | sl10788 | G0:0051347 | <1e-4 | sl10372 | G0:0022836 | <1e-4 | ssr7093 | G0:0043226 | <1e-4 | sl11109 | G0:0016874 | 0.0184 |
| sl11698 | G0:0043412 | <1e-4 | sl10736 | G0:0044271 | <1e-4 | ssr2439 | G0:0016462 | <1e-4 | sl10243 | G0:0044425 | <1e-4 | slr1468 | G0:0016874 | 0.0184 |
| slr1618 | G0:0044281 | <1e-4 | slr2070 | G0:0009117 | <1e-4 | slr0238 | G0:0015267 | <1e-4 | slr0498 | G0:0044464 | <1e-4 | slr7012 | G0:0016874 | 0.0184 |
| ssl7045 | G0:0045184 | <1e-4 | sl11696 | G0:0043170 | <1e-4 | ssl1378 | G0:0022857 | <1e-4 | sl10781 | G0:0044425 | <1e-4 | slr6021 | G0:0016874 | 0.0184 |
| slr1534 | G0:0006793 | <1e-4 | sl10864 | G0:0006732 | <1e-4 | slr1851 | G0:0043167 | <1e-4 | ssl2733 | G0:0005575 | <1e-4 | sl11203 | G0:0016874 | 0.0184 |
| ssl1923 | G0:0051171 | <1e-4 | slr1807 | G0:0006811 | <1e-4 | sl10269 | G0:0043167 | <1e-4 | slr1658 | G0:0044446 | <1e-4 | sl10659 | G0:0016874 | 0.0184 |
| slr6100 | G0:0048523 | <1e-4 | ssl0242 | G0:0016052 | <1e-4 | sl11949 | G0:0016818 | <1e-4 | sl10577 | G0:0044424 | <1e-4 | sl10688 | G0:0006950 | 0.0183 |
| sl11563 | G0:0048522 | <1e-4 | sl10787 | G0:0019752 | <1e-4 | sl10785 | G0:0022892 | <1e-4 | slr1768 | G0:0044425 | <1e-4 | slr1762 | G0:0006950 | 0.0183 |
| ssl2245 | G0:0009259 | <1e-4 | sl12013 | G0:0019752 | <1e-4 | sl12006 | G0:0022836 | <1e-4 | slr7096 | G0:0005575 | <1e-4 | sl10980 | G0:0006950 | 0.0183 |
| slr6104 | G0:0031326 | <1e-4 | sl10760 | G0:0031640 | <1e-4 | slr7026 | G0:0022832 | <1e-4 | slr1470 | G0:0043226 | <1e-4 | slr2080 | G0:0006950 | 0.0183 |
| ssl6061 | G0:0043170 | <1e-4 | sl11652 | G0:0009142 | <1e-4 | sl10102 | G0:0016817 | <1e-4 | sl10596 | G0:0044424 | <1e-4 | ssr1528 | G0:0006950 | 0.0183 |
| slr0023 | G0:0044003 | <1e-4 | sl10910 | G0:0050789 | <1e-4 | sl10147 | G0:0015267 | <1e-4 | slr2018 | G0:0043226 | <1e-4 | slr0207 | G0:0006950 | 0.0183 |
| sl11025 | G0:0006066 | <1e-4 | slr1811 | G0:0009124 | <1e-4 | sl11119 | G0:0016741 | <1e-4 | sl11272 | G0:0044425 | <1e-4 | slr1338 | G0:0006950 | 0.0183 |
| slr0304 | G0:0046164 | <1e-4 | sl10930 | G0:0046128 | <1e-4 | sl11004 | G0:0042623 | <1e-4 | slr0250 | G0:0044444 | <1e-4 | slr0702 | G0:0006950 | 0.0183 |
| slr1546 | G0:0052188 | <1e-4 | slr1406 | G0:0009117 | <1e-4 | sl11702 | G0:0016817 | <1e-4 | slr1186 | G0:0005575 | <1e-4 | sl10319 | G0:0006950 | 0.0183 |
| slr1895 | G0:0034654 | <1e-4 | sl11119 | G0:0009262 | <1e-4 | slr1999 | G0:0022838 | <1e-4 | sl11063 | G0:0005575 | <1e-4 | sl10359 | G0:0006950 | 0.0183 |
| sl10780 | G0:0051818 | <1e-4 | sl11106 | G0:0055086 | <1e-4 | slr1449 | G0:0015075 | <1e-4 | slr1218 | G0:0005575 | <1e-4 | sl11634 | G0:0006950 | 0.0183 |
| sl11191 | G0:0019362 | <1e-4 | slr1644 | G0:0006066 | <1e-4 | slr0076 | G0:0022838 | <1e-4 | slr0637 | G0:0044446 | <1e-4 | sl10810 | G0:0006950 | 0.0183 |
| sl15003 | G0:0043412 | <1e-4 | sl17086 | G0:0050801 | <1e-4 | sl18027 | G0:0022892 | <1e-4 | sl10688 | G0:0044464 | <1e-4 | slr2048 | G0:0006950 | 0.0183 |
| ssr7093 | G0:0009124 | <1e-4 | sl10703 | G0:0006811 | <1e-4 | slr7095 | G0:0043167 | <1e-4 | sl17077 | G0:0044425 | <1e-4 | slr1240 | G0:0006950 | 0.0183 |
| slr0147 | G0:0042180 | <1e-4 | slr6047 | G0:0044260 | <1e-4 | ssr2615 | G0:0015291 | <1e-4 | slr0146 | G0:0005575 | <1e-4 | slr0272 | G0:0006950 | 0.0183 |
| sl11092 | G0:0009059 | <1e-4 | ssl5091 | G0:0044106 | <1e-4 | ssr3532 | G0:0015077 | <1e-4 | ss18008 | G0:0044446 | <1e-4 | slr0053 | G0:0006950 | 0.0183 |
| sl15003 | G0:0071554 | <1e-4 | ssr8013 | G0:0016052 | <1e-4 | sl10445 | G0:0042623 | <1e-4 | slr1827 | G0:0044422 | <1e-4 | slr1209 | G0:0006950 | 0.0183 |
| ssl1046 | G0:0034654 | <1e-4 | slr1616 | G0:0019637 | <1e-4 | slr1493 | G0:0022838 | <1e-4 | slr0551 | G0:0005575 | <1e-4 | slr0172 | G0:0006950 | 0.0183 |
| slr2118 | G0:0009165 | <1e-4 | sl10656 | G0:0009150 | <1e-4 | sl10241 | G0:0016746 | <1e-4 | sl10448 | G0:0005575 | <1e-4 | slr0456 | G0:0006950 | 0.0183 |
| slr0104 | G0:0006576 | <1e-4 | sl10473 | G0:0071840 | <1e-4 | slr8014 | G0:0022857 | <1e-4 | ssl3692 | G0:0005575 | <1e-4 | sl10737 | G0:0006950 | 0.0183 |
| ssl2920 | G0:0051234 | <1e-4 | slr7071 | G0:0034654 | <1e-4 | ssr3532 | G0:0043167 | <1e-4 | sl10406 | G0:0043226 | <1e-4 | ssl0352 | G0:0006950 | 0.0182 |
| sl11273 | G0:0043648 | <1e-4 | ssl0353 | G0:0006766 | <1e-4 | sl11960 | G0:0022891 | <1e-4 | slr1790 | G0:0005575 | <1e-4 | sl11954 | G0:0006950 | 0.0182 |
| slr6039 | G0:0044255 | <1e-4 | sl18011 | G0:0031323 | <1e-4 | sl10843 | G0:0016746 | <1e-4 | slr0517 | G0:0005575 | <1e-4 | sl10309 | G0:0006950 | 0.0182 |
| slr1563 | G0:0046128 | <1e-4 | slr1210 | G0:0052188 | <1e-4 | sl10496 | G0:0043492 | <1e-4 | slr0990 | G0:0005575 | <1e-4 | slr1854 | G0:0006950 | 0.0182 |
| sl11763 | G0:0009262 | <1e-4 | sl10586 | G0:0043170 | <1e-4 | slr1533 | G0:0022832 | <1e-4 | slr0780 | G0:0044464 | <1e-4 | slr0386 | G0:0006950 | 0.0182 |
| slr6047 | G0:0052188 | <1e-4 | slr1262 | G0:0019222 | <1e-4 | slr6014 | G0:0016817 | <1e-4 | slr0509 | G0:0005575 | <1e-4 | slr1275 | G0:0006950 | 0.0182 |
| ssr6003 | G0:0042451 | <1e-4 | ssr1407 | G0:0019362 | <1e-4 | slr0341 | G0:0016462 | <1e-4 | slr5012 | G0:0044464 | <1e-4 | ssr2755 | G0:0006950 | 0.0182 |
| sl10272 | G0:0055086 | <1e-4 | slr0111 | G0:0009259 | <1e-4 | slr0587 | G0:0060089 | <1e-4 | sl10252 | G0:0005575 | <1e-4 | ssr1765 | G0:0006950 | 0.0182 |
| sl11241 | G0:0048518 | <1e-4 | ssr2975 | G0:0006732 | <1e-4 | slr1339 | G0:0043492 | <1e-4 | ssl3291 | G0:0005575 | <1e-4 | slr0770 | G0:0006950 | 0.0182 |
| slr1259 | G0:0072522 | <1e-4 | sl10174 | G0:0042455 | <1e-4 | sl10661 | G0:0016741 | <1e-4 | slr0050 | G0:0005575 | <1e-4 | slr0723 | G0:0006950 | 0.0182 |
| sl10939 | G0:0072521 | <1e-4 | slr1068 | G0:0065007 | <1e-4 | ssr1407 | G0:0042623 | <1e-4 | sl10102 | G0:0043226 | <1e-4 | slr0023 | G0:0006950 | 0.0182 |
| slr0742 | G0:0046394 | <1e-4 | slr1203 | G0:0051186 | <1e-4 | slr0885 | G0:0043167 | <1e-4 | sl11399 | G0:0044446 | <1e-4 | sl11262 | G0:0006950 | 0.0182 |
| sl12007 | G0:0006721 | <1e-4 | slr0609 | G0:0010468 | <1e-4 | sl10780 | G0:0015267 | <1e-4 | sl10267 | G0:0005575 | <1e-4 | slr1081 | G0:0006950 | 0.0182 |
| slr0059 | G0:0008150 | <1e-4 | slr1032 | G0:0006811 | <1e-4 | slr1644 | G0:0016829 | <1e-4 | ssr6085 | G0:0005575 | <1e-4 | slr1913 | G0:0006950 | 0.0182 |
| sl10585 | G0:0044003 | <1e-4 | slr1415 | G0:0009059 | <1e-4 | slr1436 | G0:0022803 | <1e-4 | slr0870 | G0:0043226 | <1e-4 | slr1593 | G0:0006950 | 0.0182 |
| slr0147 | G0:0009124 | <1e-4 | slr0634 | G0:0009056 | <1e-4 | sl11925 | G0:0016462 | <1e-4 | ssl1377 | G0:0044424 | <1e-4 | sl11630 | G0:0006950 | 0.0182 |
| ssr7093 | G0:0055086 | <1e-4 | sl10564 | G0:0006163 | <1e-4 | slr1442 | G0:0016746 | <1e-4 | slr1338 | G0:0005575 | <1e-4 | sl10606 | G0:0016820 | 0.0182 |
| sl11239 | G0:0033013 | <1e-4 | ssl2920 | G0:0048518 | <1e-4 | sl11638 | G0:0022891 | <1e-4 | sl11783 | G0:0005575 | <1e-4 | ssr2201 | G0:0016820 | 0.0182 |
| sl10066 | G0:0046394 | <1e-4 | ssl2420 | G0:0051716 | <1e-4 | slr1800 | G0:0016741 | <1e-4 | sl12006 | G0:0044444 | <1e-4 | ssr2803 | G0:0016820 | 0.0182 |
| slr1951 | G0:0009165 | <1e-4 | ssr7093 | G0:0072522 | <1e-4 | sl10361 | G0:0016817 | <1e-4 | slr0924 | G0:0044422 | <1e-4 | sl10647 | G0:0016820 | 0.0182 |

|         |            |       |         |            |       |         |            |       |         |            |       |         |            |        |
|---------|------------|-------|---------|------------|-------|---------|------------|-------|---------|------------|-------|---------|------------|--------|
| slr0702 | G0:0044271 | <1e-4 | ssl5096 | G0:0051171 | <1e-4 | sl10481 | G0:0016817 | <1e-4 | slr1978 | G0:0044422 | <1e-4 | slr1032 | G0:0016820 | 0.0182 |
| slr1218 | G0:0043412 | <1e-4 | ssl2069 | G0:0009126 | <1e-4 | sl10188 | G0:0016817 | <1e-4 | slr1053 | G0:0044464 | <1e-4 | sl10272 | G0:0016820 | 0.0182 |
| sl11526 | G0:0022607 | <1e-4 | slr1436 | G0:0072521 | <1e-4 | slr0771 | G0:0015399 | <1e-4 | sl11651 | G0:0044444 | <1e-4 | sl10103 | G0:0016820 | 0.0182 |
| sl10785 | G0:0065007 | <1e-4 | slr6006 | G0:0031640 | <1e-4 | slr6044 | G0:0016818 | <1e-4 | slr7094 | G0:0005575 | <1e-4 | sl10932 | G0:0016820 | 0.0182 |
| slr1442 | G0:0031326 | <1e-4 | slr0609 | G0:0018130 | <1e-4 | slr7102 | G0:0022803 | <1e-4 | sl16053 | G0:0043226 | <1e-4 | sl11763 | G0:0016740 | 0.0181 |
| sl11530 | G0:0016053 | <1e-4 | sl18032 | G0:0018130 | <1e-4 | sl10176 | G0:0015075 | <1e-4 | slr1278 | G0:0005575 | <1e-4 | slr1614 | G0:0016740 | 0.0181 |
| slr0692 | G0:0051188 | <1e-4 | ssl2717 | G0:0009144 | <1e-4 | slr0505 | G0:0022892 | <1e-4 | slr6068 | G0:0044422 | <1e-4 | slr1699 | G0:0005515 | 0.018  |
| slr0813 | G0:0072522 | <1e-4 | sl10098 | G0:0019219 | <1e-4 | sl10736 | G0:0016746 | <1e-4 | slr1203 | G0:0044425 | <1e-4 | slr1812 | G0:0005515 | 0.018  |
| slr0695 | G0:0044248 | <1e-4 | slr0605 | G0:0043412 | <1e-4 | sl10372 | G0:0022803 | <1e-4 | ssl1255 | G0:0044425 | <1e-4 | slr1444 | G0:0004518 | 0.0177 |
| sl17066 | G0:0034641 | <1e-4 | sl10497 | G0:0016054 | <1e-4 | slr6022 | G0:0022832 | <1e-4 | sl11009 | G0:0044424 | <1e-4 | slr1098 | G0:0004518 | 0.0177 |
| slr1307 | G0:0044260 | <1e-4 | ssr5020 | G0:0034654 | <1e-4 | slr6021 | G0:0022891 | <1e-4 | sl10252 | G0:0044425 | <1e-4 | slr1865 | G0:0004518 | 0.0177 |
| sl10886 | G0:0051818 | <1e-4 | slr0909 | G0:0043170 | <1e-4 | slr1082 | G0:0015291 | <1e-4 | ssl1918 | G0:0005575 | <1e-4 | sl11751 | G0:0004518 | 0.0177 |
| slr1306 | G0:0010556 | <1e-4 | slr0751 | G0:0060255 | <1e-4 | sl10447 | G0:0016462 | <1e-4 | sl15069 | G0:0043226 | <1e-4 | sl10910 | G0:0004518 | 0.0177 |
| sl11942 | G0:0006732 | <1e-4 | ssr2047 | G0:0010468 | <1e-4 | sl18035 | G0:0022832 | <1e-4 | sl10236 | G0:0044464 | <1e-4 | slr1726 | G0:0004518 | 0.0177 |
| slr1977 | G0:0044255 | <1e-4 | sl10815 | G0:0046907 | <1e-4 | ssl7022 | G0:0022890 | <1e-4 | slr1150 | G0:0043226 | <1e-4 | slr0479 | G0:0004518 | 0.0177 |
| slr1534 | G0:0009124 | <1e-4 | ssr0336 | G0:0006066 | <1e-4 | slr1406 | G0:0015077 | <1e-4 | ssr2615 | G0:0005575 | <1e-4 | slr1047 | G0:0004518 | 0.0177 |
| sl15026 | G0:0019637 | <1e-4 | ssl2717 | G0:0052188 | <1e-4 | sl11526 | G0:0015291 | <1e-4 | slr1210 | G0:0005575 | <1e-4 | sl10361 | G0:0004518 | 0.0177 |
| slr1235 | G0:0019751 | <1e-4 | slr7101 | G0:0044260 | <1e-4 | slr1534 | G0:0015291 | <1e-4 | slr0870 | G0:0044425 | <1e-4 | ssl1377 | G0:0004518 | 0.0177 |
| sl12015 | G0:0048522 | <1e-4 | slr0104 | G0:0008150 | <1e-4 | sl11372 | G0:0022838 | <1e-4 | slr1895 | G0:0044464 | <1e-4 | ssl2996 | G0:0004518 | 0.0177 |
| sl11563 | G0:0031326 | <1e-4 | sl10175 | G0:0045184 | <1e-4 | slr1885 | G0:0022857 | <1e-4 | slr0146 | G0:0044424 | <1e-4 | sl11251 | G0:0006807 | 0.0176 |
| ssr2047 | G0:0051234 | <1e-4 | sl11472 | G0:0046164 | <1e-4 | slr1613 | G0:0015267 | <1e-4 | slr0110 | G0:0044425 | <1e-4 | sl10319 | G0:0006807 | 0.0176 |
| slr0890 | G0:0043170 | <1e-4 | slr5118 | G0:0009987 | <1e-4 | sl10263 | G0:0022857 | <1e-4 | slr0238 | G0:0044425 | <1e-4 | sl10281 | G0:0006807 | 0.0176 |
| ssl1918 | G0:0009161 | <1e-4 | slr2105 | G0:0019752 | <1e-4 | sl10843 | G0:0015077 | <1e-4 | ssr2142 | G0:0005575 | <1e-4 | sl11240 | G0:0019538 | 0.0176 |
| sl11761 | G0:0051179 | <1e-4 | ssr5019 | G0:0009199 | <1e-4 | sl11233 | G0:0015267 | <1e-4 | sl15069 | G0:0044425 | <1e-4 | slr0172 | G0:0006807 | 0.0176 |
| slr1800 | G0:0006721 | <1e-4 | slr5116 | G0:0009260 | <1e-4 | ssl2138 | G0:0008171 | <1e-4 | slr0285 | G0:0044422 | <1e-4 | slr1303 | G0:0006807 | 0.0176 |
| slr0111 | G0:0072527 | <1e-4 | sl10743 | G0:0071842 | <1e-4 | sl10931 | G0:0015293 | <1e-4 | sl10761 | G0:0005575 | <1e-4 | slr0104 | G0:0006807 | 0.0176 |
| sl11201 | G0:0009142 | <1e-4 | sl10702 | G0:0009260 | <1e-4 | ssr5117 | G0:0022892 | <1e-4 | slr0664 | G0:0044444 | <1e-4 | slr1852 | G0:0019538 | 0.0176 |
| sl15028 | G0:0009150 | <1e-4 | ssl1263 | G0:0006811 | <1e-4 | slr0264 | G0:0016817 | <1e-4 | slr6067 | G0:0044425 | <1e-4 | slr0053 | G0:0019538 | 0.0176 |
| slr1413 | G0:0044260 | <1e-4 | slr1169 | G0:0051347 | <1e-4 | sl11562 | G0:0015291 | <1e-4 | sl11921 | G0:0044424 | <1e-4 | slr0654 | G0:0006807 | 0.0176 |
| slr7058 | G0:0051179 | <1e-4 | sl11765 | G0:0006732 | <1e-4 | slr1566 | G0:0015077 | <1e-4 | sl11160 | G0:0044422 | <1e-4 | sl10156 | G0:0006807 | 0.0176 |
| slr1362 | G0:0050794 | <1e-4 | sl11191 | G0:0043549 | <1e-4 | sl11163 | G0:0016741 | <1e-4 | sl10994 | G0:0044444 | <1e-4 | slr1122 | G0:0006807 | 0.0176 |
| ssr1698 | G0:0046164 | <1e-4 | slr1484 | G0:0044106 | <1e-4 | ssl8003 | G0:0042623 | <1e-4 | slr0680 | G0:0044424 | <1e-4 | sl10781 | G0:0006807 | 0.0176 |
| sl10775 | G0:0009141 | <1e-4 | sl10382 | G0:0052188 | <1e-4 | sl11476 | G0:0005342 | <1e-4 | slr0006 | G0:0044424 | <1e-4 | slr1287 | G0:0019538 | 0.0176 |
| sl10481 | G0:0009123 | <1e-4 | slr0964 | G0:0006766 | <1e-4 | slr2003 | G0:0016462 | <1e-4 | slr6100 | G0:0044446 | <1e-4 | sl10787 | G0:0006807 | 0.0176 |
| slr1668 | G0:0006066 | <1e-4 | slr1032 | G0:0042455 | <1e-4 | ssr2843 | G0:0015293 | <1e-4 | slr1563 | G0:0005575 | <1e-4 | sl10981 | G0:0019538 | 0.0176 |
| sl11400 | G0:0046164 | <1e-4 | slr0914 | G0:0065007 | <1e-4 | slr0769 | G0:0043492 | <1e-4 | sl11411 | G0:0044422 | <1e-4 | sl11054 | G0:0019538 | 0.0176 |
| slr1815 | G0:0043648 | <1e-4 | sl10752 | G0:0006753 | <1e-4 | ssl1520 | G0:0022838 | <1e-4 | sl11429 | G0:0044444 | <1e-4 | ssr2754 | G0:0019538 | 0.0176 |
| sgl0002 | G0:0006576 | <1e-4 | slr1958 | G0:0042451 | <1e-4 | slr0013 | G0:0022803 | <1e-4 | ssl1417 | G0:0044424 | <1e-4 | slr1413 | G0:0006807 | 0.0176 |
| ssl1004 | G0:0044260 | <1e-4 | slr0199 | G0:0044106 | <1e-4 | sl11021 | G0:0022857 | <1e-4 | sl11891 | G0:0043226 | <1e-4 | sl11752 | G0:0006807 | 0.0176 |
| slr0784 | G0:0009126 | <1e-4 | slr0442 | G0:0048523 | <1e-4 | sl10405 | G0:0043492 | <1e-4 | slr0468 | G0:0043226 | <1e-4 | sl11541 | G0:0006807 | 0.0176 |
| sl11995 | G0:0008150 | <1e-4 | slr1117 | G0:0044260 | <1e-4 | sl10751 | G0:0016817 | <1e-4 | sl10252 | G0:0044444 | <1e-4 | sl11173 | G0:0006807 | 0.0176 |
| slr6006 | G0:0043436 | <1e-4 | ssl8005 | G0:0031326 | <1e-4 | slr0695 | G0:0008171 | <1e-4 | slr0374 | G0:0044444 | <1e-4 | sl10156 | G0:0019538 | 0.0176 |
| slr1270 | G0:0050801 | <1e-4 | slr1768 | G0:0006082 | <1e-4 | sl11638 | G0:0022838 | <1e-4 | ssr7017 | G0:0005575 | <1e-4 | slr0650 | G0:0006807 | 0.0176 |
| sl11188 | G0:0034641 | <1e-4 | slr1530 | G0:0009132 | <1e-4 | slr1288 | G0:0022836 | <1e-4 | slr1258 | G0:0044464 | <1e-4 | sl17065 | G0:0019538 | 0.0176 |
| slr1862 | G0:0019222 | <1e-4 | ssl5098 | G0:0046164 | <1e-4 | sl11961 | G0:0022838 | <1e-4 | slr0887 | G0:0043226 | <1e-4 | sl11634 | G0:0019538 | 0.0176 |
| sl10060 | G0:0016053 | <1e-4 | slr6087 | G0:0034660 | <1e-4 | slr0801 | G0:0016741 | <1e-4 | ssr6062 | G0:0044444 | <1e-4 | ssl3382 | G0:0019538 | 0.0176 |
| ssl8003 | G0:0010556 | <1e-4 | slr1084 | G0:0044281 | <1e-4 | slr0195 | G0:0016741 | <1e-4 | slr0919 | G0:0044424 | <1e-4 | sl10688 | G0:0006807 | 0.0176 |
| slr1572 | G0:0019222 | <1e-4 | slr1398 | G0:0051171 | <1e-4 | slr1471 | G0:0015405 | <1e-4 | slr0821 | G0:0044446 | <1e-4 | sl11201 | G0:0019538 | 0.0176 |
| slr0313 | G0:0009126 | <1e-4 | ssl1552 | G0:0009056 | <1e-4 | slr1102 | G0:0060089 | <1e-4 | sl10553 | G0:0044444 | <1e-4 | sl10888 | G0:0019538 | 0.0176 |
| slr7083 | G0:0071842 | <1e-4 | slr8022 | G0:0009394 | <1e-4 | slr1259 | G0:0016817 | <1e-4 | slr0553 | G0:0044444 | <1e-4 | slr1544 | G0:0019538 | 0.0176 |
| slr0780 | G0:0009987 | <1e-4 | slr0294 | G0:0071841 | <1e-4 | slr1378 | G0:0016741 | <1e-4 | slr7102 | G0:0044424 | <1e-4 | sl11352 | G0:0019538 | 0.0176 |
| sl11775 | G0:0001932 | <1e-4 | slr1573 | G0:0044255 | <1e-4 | sl11942 | G0:0015291 | <1e-4 | sl10827 | G0:0043226 | <1e-4 | sl11873 | G0:0006807 | 0.0176 |
| sl10853 | G0:0051171 | <1e-4 | sl11095 | G0:0043412 | <1e-4 | sl11956 | G0:0003674 | <1e-4 | ssl1972 | G0:0043226 | <1e-4 | sl11071 | G0:0019538 | 0.0176 |
| ssl1792 | G0:0019752 | <1e-4 | slr0358 | G0:0008150 | <1e-4 | slr1436 | G0:0060089 | <1e-4 | sl17067 | G0:0005575 | <1e-4 | slr1895 | G0:0019538 | 0.0176 |

|         |            |       |         |            |       |         |            |       |         |            |       |         |            |        |
|---------|------------|-------|---------|------------|-------|---------|------------|-------|---------|------------|-------|---------|------------|--------|
| sl10532 | G0:0080090 | <1e-4 | sl10072 | G0:0055082 | <1e-4 | sl17066 | G0:0005342 | <1e-4 | slr0670 | G0:0005575 | <1e-4 | slr0729 | G0:0019538 | 0.0176 |
| slr1762 | G0:0009987 | <1e-4 | slr1854 | G0:0016053 | <1e-4 | sl10543 | G0:0022891 | <1e-4 | slr7016 | G0:0044425 | <1e-4 | slr1062 | G0:0019538 | 0.0176 |
| slr1533 | G0:0009123 | <1e-4 | slr1396 | G0:0072527 | <1e-4 | slr0211 | G0:0022836 | <1e-4 | slr0771 | G0:0043226 | <1e-4 | sl10871 | G0:0006807 | 0.0176 |
| sl11737 | G0:0006732 | <1e-4 | slr2101 | G0:0009394 | <1e-4 | ssr6002 | G0:0016741 | <1e-4 | ssr2711 | G0:0043226 | <1e-4 | sl11660 | G0:0019538 | 0.0176 |
| sl11884 | G0:0006220 | <1e-4 | slr0770 | G0:0052188 | <1e-4 | slr6045 | G0:0043492 | <1e-4 | slr0921 | G0:0005575 | <1e-4 | sl10737 | G0:0006807 | 0.0176 |
| slr0989 | G0:0042180 | <1e-4 | sl10933 | G0:0044238 | <1e-4 | sl11531 | G0:0015405 | <1e-4 | sl10497 | G0:0044444 | <1e-4 | slr1616 | G0:0006807 | 0.0176 |
| sl11142 | G0:0006721 | <1e-4 | sl11702 | G0:0048878 | <1e-4 | sl18012 | G0:0016746 | <1e-4 | sl17030 | G0:0044424 | <1e-4 | slr0111 | G0:0019538 | 0.0176 |
| slr0989 | G0:0016053 | <1e-4 | slr6064 | G0:0009309 | <1e-4 | ss13692 | G0:0022892 | <1e-4 | sl10102 | G0:0044444 | <1e-4 | slr1762 | G0:0019538 | 0.0176 |
| slr0981 | G0:0051188 | <1e-4 | ssr1114 | G0:0009889 | <1e-4 | ss12814 | G0:0016817 | <1e-4 | slr1396 | G0:0044444 | <1e-4 | slr0887 | G0:0006807 | 0.0176 |
| ssr7079 | G0:0031640 | <1e-4 | sl10861 | G0:0006766 | <1e-4 | sl10647 | G0:0022838 | <1e-4 | sl11853 | G0:0044425 | <1e-4 | slr2125 | G0:0019538 | 0.0176 |
| sl11751 | G0:0031323 | <1e-4 | sl11757 | G0:0022607 | <1e-4 | sl11726 | G0:0016462 | <1e-4 | sl11770 | G0:0005575 | <1e-4 | slr1647 | G0:0006807 | 0.0176 |
| slr2119 | G0:0043933 | <1e-4 | ss11552 | G0:0009309 | <1e-4 | ssr2711 | G0:0022838 | <1e-4 | sl10148 | G0:0043226 | <1e-4 | ssr1114 | G0:0019538 | 0.0176 |
| ss11377 | G0:0022411 | <1e-4 | slr0924 | G0:0071840 | <1e-4 | slr1774 | G0:0043167 | <1e-4 | sl11191 | G0:0043226 | <1e-4 | sl11512 | G0:0019538 | 0.0176 |
| sl10310 | G0:0006066 | <1e-4 | ssr2009 | G0:0042455 | <1e-4 | sl11348 | G0:0043167 | <1e-4 | slr1572 | G0:0005575 | <1e-4 | ss10739 | G0:0006807 | 0.0176 |
| slr0334 | G0:0048523 | <1e-4 | slr1098 | G0:0016053 | <1e-4 | slr0053 | G0:0016818 | <1e-4 | ss13549 | G0:0044446 | <1e-4 | slr2125 | G0:0006807 | 0.0176 |
| sl10641 | G0:0080090 | <1e-4 | sl11401 | G0:0006811 | <1e-4 | sl10060 | G0:0022857 | <1e-4 | slr6075 | G0:0044424 | <1e-4 | sl10359 | G0:0019538 | 0.0176 |
| slr1616 | G0:0031326 | <1e-4 | ss17021 | G0:0010468 | <1e-4 | slr0709 | G0:0015077 | <1e-4 | sl10319 | G0:0044422 | <1e-4 | slr1152 | G0:0019538 | 0.0176 |
| slr6006 | G0:0048878 | <1e-4 | ssr1375 | G0:0006811 | <1e-4 | slr0300 | G0:0022892 | <1e-4 | slr0238 | G0:0005575 | <1e-4 | sl10188 | G0:0019538 | 0.0176 |
| sl11532 | G0:0016052 | <1e-4 | sl10525 | G0:0080090 | <1e-4 | slr6006 | G0:0022832 | <1e-4 | ssr2802 | G0:0044422 | <1e-4 | slr1074 | G0:0006807 | 0.0176 |
| slr0586 | G0:0009117 | <1e-4 | slr7026 | G0:0009199 | <1e-4 | sl10524 | G0:0016746 | <1e-4 | slr1218 | G0:0044446 | <1e-4 | sl11956 | G0:0019538 | 0.0176 |
| slr1702 | G0:0043170 | <1e-4 | sl11247 | G0:0044271 | <1e-4 | slr5073 | G0:0022836 | <1e-4 | slr1170 | G0:0044424 | <1e-4 | sl11660 | G0:0006807 | 0.0176 |
| slr0038 | G0:0044281 | <1e-4 | ssr1528 | G0:0060255 | <1e-4 | slr0702 | G0:0043167 | <1e-4 | sl11389 | G0:0044446 | <1e-4 | sl11352 | G0:0006807 | 0.0176 |
| slr1142 | G0:0006721 | <1e-4 | sl10508 | G0:0009141 | <1e-4 | slr1816 | G0:0015077 | <1e-4 | slr6088 | G0:0044424 | <1e-4 | ssr2009 | G0:0006807 | 0.0176 |
| sl11769 | G0:0009893 | <1e-4 | sl11123 | G0:0009132 | <1e-4 | ssr2439 | G0:0022890 | <1e-4 | sl10563 | G0:0044446 | <1e-4 | slr0815 | G0:0006807 | 0.0176 |
| sl10096 | G0:0019222 | <1e-4 | sl10608 | G0:0044260 | <1e-4 | slr1537 | G0:0015293 | <1e-4 | slr1681 | G0:0044464 | <1e-4 | slr0112 | G0:0019538 | 0.0176 |
| ssr1768 | G0:0009892 | <1e-4 | ss16061 | G0:0009199 | <1e-4 | sl10394 | G0:0022891 | <1e-4 | slr0755 | G0:0005575 | <1e-4 | slr7024 | G0:0019538 | 0.0176 |
| slr1413 | G0:0072522 | <1e-4 | slr0108 | G0:0050801 | <1e-4 | sl10174 | G0:0015075 | <1e-4 | slr1436 | G0:0044444 | <1e-4 | sl11239 | G0:0019538 | 0.0176 |
| sl10837 | G0:0009987 | <1e-4 | slr0610 | G0:0006631 | <1e-4 | ss17038 | G0:0015267 | <1e-4 | sl11390 | G0:0043226 | <1e-4 | slr1259 | G0:0006807 | 0.0176 |
| slr0168 | G0:0006066 | <1e-4 | sl11469 | G0:0006793 | <1e-4 | slr0049 | G0:0016462 | <1e-4 | slr1752 | G0:0005575 | <1e-4 | sl10585 | G0:0006807 | 0.0176 |
| ss18003 | G0:0051246 | <1e-4 | slr1767 | G0:0006732 | <1e-4 | ssr8047 | G0:0015293 | <1e-4 | slr0232 | G0:0005575 | <1e-4 | sl10268 | G0:0019538 | 0.0176 |
| ssr7036 | G0:0031326 | <1e-4 | sl10325 | G0:0019222 | <1e-4 | sl11352 | G0:0016817 | <1e-4 | sl10872 | G0:0044424 | <1e-4 | sl11505 | G0:0019538 | 0.0176 |
| slr0362 | G0:0071841 | <1e-4 | slr1753 | G0:0009394 | <1e-4 | ssr2972 | G0:0016741 | <1e-4 | slr0374 | G0:0005575 | <1e-4 | slr1062 | G0:0006807 | 0.0176 |
| slr1168 | G0:0006066 | <1e-4 | ss15099 | G0:0019751 | <1e-4 | sl11797 | G0:0016462 | <1e-4 | sl11766 | G0:0005575 | <1e-4 | sl10827 | G0:0006807 | 0.0176 |
| slr0545 | G0:0051179 | <1e-4 | slr5119 | G0:0046483 | <1e-4 | slr1396 | G0:0015293 | <1e-4 | ssr0335 | G0:0044424 | <1e-4 | sl10297 | G0:0019538 | 0.0176 |
| ss10832 | G0:0046164 | <1e-4 | slr1659 | G0:0016052 | <1e-4 | slr2101 | G0:0022892 | <1e-4 | sl11586 | G0:0044425 | <1e-4 | slr1977 | G0:0006807 | 0.0176 |
| slr1152 | G0:0043648 | <1e-4 | ss10461 | G0:0043549 | <1e-4 | slr6008 | G0:0015267 | <1e-4 | sl12013 | G0:0044446 | <1e-4 | sl11344 | G0:0019538 | 0.0176 |
| sl11173 | G0:0072522 | <1e-4 | slr0006 | G0:0055086 | <1e-4 | sl15006 | G0:0015075 | <1e-4 | sl10446 | G0:0044444 | <1e-4 | slr1762 | G0:0006807 | 0.0176 |
| slr1107 | G0:0009259 | <1e-4 | sl11834 | G0:0009141 | <1e-4 | sl11092 | G0:0015077 | <1e-4 | sl10588 | G0:0044464 | <1e-4 | sl11021 | G0:0006807 | 0.0176 |
| sl10296 | G0:0051179 | <1e-4 | sl11461 | G0:0005996 | <1e-4 | slr2121 | G0:0005342 | <1e-4 | sl10172 | G0:0044464 | <1e-4 | sl10787 | G0:0019538 | 0.0176 |
| slr1306 | G0:0009893 | <1e-4 | sl11571 | G0:0006720 | <1e-4 | sl11164 | G0:0015075 | <1e-4 | slr0345 | G0:0044425 | <1e-4 | sl11938 | G0:0006807 | 0.0176 |
| ssr3572 | G0:0009057 | <1e-4 | slr0755 | G0:0009262 | <1e-4 | slr0941 | G0:0022836 | <1e-4 | sl10539 | G0:0043226 | <1e-4 | sl10623 | G0:0006807 | 0.0176 |
| slr2018 | G0:0009259 | <1e-4 | sl10253 | G0:0009056 | <1e-4 | slr0049 | G0:0060089 | <1e-4 | sl11241 | G0:0044422 | <1e-4 | sl10225 | G0:0006807 | 0.0176 |
| slr1215 | G0:0043549 | <1e-4 | ssr2711 | G0:0006576 | <1e-4 | sl11638 | G0:0003674 | <1e-4 | slr2080 | G0:0005575 | <1e-4 | sl10843 | G0:0019538 | 0.0176 |
| ss15008 | G0:0042180 | <1e-4 | sl10241 | G0:0006631 | <1e-4 | sl17066 | G0:0015291 | <1e-4 | slr2049 | G0:0044464 | <1e-4 | sl10188 | G0:0006807 | 0.0176 |
| slr1932 | G0:0050794 | <1e-4 | sl10539 | G0:0009124 | <1e-4 | slr2118 | G0:0008171 | <1e-4 | slr0552 | G0:0043226 | <1e-4 | sl11934 | G0:0042626 | 0.0176 |
| slr1535 | G0:0051186 | <1e-4 | sgl0001 | G0:0042180 | <1e-4 | ssr2554 | G0:0022890 | <1e-4 | slr0144 | G0:0005575 | <1e-4 | sl11166 | G0:0042626 | 0.0176 |
| slr1484 | G0:0042455 | <1e-4 | slr1601 | G0:0048519 | <1e-4 | sl10335 | G0:0015077 | <1e-4 | sl11526 | G0:0044464 | <1e-4 | slr1187 | G0:0008233 | 0.0176 |
| sl10241 | G0:0006732 | <1e-4 | slr1462 | G0:0034641 | <1e-4 | slr0456 | G0:0003674 | <1e-4 | slr0498 | G0:0043226 | <1e-4 | ssr2848 | G0:0042626 | 0.0176 |
| sl15004 | G0:0006631 | <1e-4 | slr6039 | G0:0034660 | <1e-4 | slr0642 | G0:0015291 | <1e-4 | sl11192 | G0:0044422 | <1e-4 | slr0243 | G0:0042626 | 0.0176 |
| ssr1552 | G0:0006811 | <1e-4 | ssr1041 | G0:0046128 | <1e-4 | sl10442 | G0:0022803 | <1e-4 | slr1593 | G0:0044444 | <1e-4 | sl10241 | G0:0008233 | 0.0176 |
| slr1767 | G0:0043933 | <1e-4 | slr0813 | G0:0006631 | <1e-4 | slr6106 | G0:0015075 | <1e-4 | ssr2318 | G0:0043226 | <1e-4 | sl17064 | G0:0008233 | 0.0176 |
| sl10518 | G0:0009309 | <1e-4 | ssr0761 | G0:0006811 | <1e-4 | slr7080 | G0:0016741 | <1e-4 | slr6057 | G0:0044425 | <1e-4 | slr0601 | G0:0008233 | 0.0176 |
| slr1236 | G0:0080090 | <1e-4 | slr0334 | G0:0034641 | <1e-4 | sl10446 | G0:0015293 | <1e-4 | slr2005 | G0:0005575 | <1e-4 | sl10063 | G0:0008233 | 0.0176 |
| slr1025 | G0:0044283 | <1e-4 | slr6068 | G0:0006163 | <1e-4 | sl11696 | G0:0015293 | <1e-4 | ss10350 | G0:0044425 | <1e-4 | ssr6048 | G0:0008233 | 0.0176 |



|         |            |       |         |            |       |         |            |       |         |            |       |         |            |        |
|---------|------------|-------|---------|------------|-------|---------|------------|-------|---------|------------|-------|---------|------------|--------|
| s110149 | G0:0044237 | <1e-4 | s1r2012 | G0:0045184 | <1e-4 | s1r0588 | G0:0022832 | <1e-4 | s111476 | G0:0044422 | <1e-4 | s110727 | G0:0008233 | 0.0176 |
| s110274 | G0:0009144 | <1e-4 | s111373 | G0:0046164 | <1e-4 | s110369 | G0:0016462 | <1e-4 | s1r0348 | G0:0044464 | <1e-4 | s110857 | G0:0008233 | 0.0176 |
| ss10109 | G0:0009057 | <1e-4 | s110786 | G0:0080090 | <1e-4 | s110864 | G0:0016818 | <1e-4 | s1r5101 | G0:0005575 | <1e-4 | s1r0545 | G0:0042626 | 0.0176 |
| s1r1788 | G0:0009199 | <1e-4 | s110191 | G0:0043412 | <1e-4 | s110449 | G0:0016741 | <1e-4 | s1r1071 | G0:0044424 | <1e-4 | s111130 | G0:0008233 | 0.0176 |
| s111217 | G0:0006220 | <1e-4 | s1r1218 | G0:0048518 | <1e-4 | s110606 | G0:0008171 | <1e-4 | ssr6002 | G0:0044422 | <1e-4 | ssr0536 | G0:0042626 | 0.0176 |
| s118004 | G0:0042451 | <1e-4 | s110381 | G0:0051171 | <1e-4 | s111442 | G0:0043167 | <1e-4 | s110265 | G0:0043226 | <1e-4 | ssr1766 | G0:0008233 | 0.0176 |
| s1r0872 | G0:0060255 | <1e-4 | s112011 | G0:0009124 | <1e-4 | s1r0888 | G0:0016741 | <1e-4 | ssr1528 | G0:0044446 | <1e-4 | s1r0355 | G0:0008233 | 0.0176 |
| s1r0810 | G0:0071842 | <1e-4 | s111089 | G0:0009056 | <1e-4 | s110068 | G0:0008171 | <1e-4 | s1r0489 | G0:0044446 | <1e-4 | s110994 | G0:0008233 | 0.0176 |
| s111192 | G0:0009161 | <1e-4 | s1r6028 | G0:0009117 | <1e-4 | s111052 | G0:0015291 | <1e-4 | s1r1206 | G0:0044464 | <1e-4 | s110266 | G0:0008233 | 0.0176 |
| s1r6094 | G0:0034660 | <1e-4 | ssr7093 | G0:0055082 | <1e-4 | ss12595 | G0:0016462 | <1e-4 | s110744 | G0:0044424 | <1e-4 | s118004 | G0:0008233 | 0.0176 |
| s1r0964 | G0:0052188 | <1e-4 | s111606 | G0:0048518 | <1e-4 | s110625 | G0:0016746 | <1e-4 | s111350 | G0:0043226 | <1e-4 | s1r6073 | G0:0008233 | 0.0176 |
| s118035 | G0:0034654 | <1e-4 | s1r0337 | G0:0042451 | <1e-4 | s1r1397 | G0:0022803 | <1e-4 | ssr6019 | G0:0005575 | <1e-4 | s116054 | G0:0008233 | 0.0176 |
| s1r0699 | G0:0022607 | <1e-4 | s111151 | G0:0009144 | <1e-4 | ssr2060 | G0:0015267 | <1e-4 | ss12138 | G0:0005575 | <1e-4 | s115047 | G0:0008233 | 0.0176 |
| s1r1143 | G0:0072528 | <1e-4 | s1r1813 | G0:0044255 | <1e-4 | s111926 | G0:0022803 | <1e-4 | s1r5053 | G0:0044446 | <1e-4 | s111651 | G0:0008233 | 0.0176 |
| ss11263 | G0:0009987 | <1e-4 | s112013 | G0:0016053 | <1e-4 | ss12064 | G0:0015075 | <1e-4 | s1r1704 | G0:0044425 | <1e-4 | s111186 | G0:0042626 | 0.0176 |
| s111160 | G0:0044281 | <1e-4 | ssr1528 | G0:0006163 | <1e-4 | s1r0601 | G0:0015293 | <1e-4 | s110595 | G0:0044422 | <1e-4 | s112015 | G0:0008233 | 0.0176 |
| s111532 | G0:0006721 | <1e-4 | s110861 | G0:0044281 | <1e-4 | ssr2803 | G0:0022832 | <1e-4 | s1r6091 | G0:0044444 | <1e-4 | s1r0092 | G0:0008233 | 0.0176 |
| s1r1425 | G0:0006753 | <1e-4 | s111486 | G0:0006163 | <1e-4 | s110822 | G0:0022891 | <1e-4 | s1r0948 | G0:0044422 | <1e-4 | s111400 | G0:0008233 | 0.0176 |
| ss17022 | G0:0006576 | <1e-4 | ssr5120 | G0:0009262 | <1e-4 | s1r1970 | G0:0043167 | <1e-4 | s110543 | G0:0044425 | <1e-4 | s115034 | G0:0008233 | 0.0176 |
| s1r1914 | G0:0043170 | <1e-4 | s111651 | G0:0046394 | <1e-4 | s110590 | G0:0015267 | <1e-4 | ss10294 | G0:0005575 | <1e-4 | s111601 | G0:0042626 | 0.0176 |
| s111239 | G0:0044283 | <1e-4 | s1r1932 | G0:0044271 | <1e-4 | s1r0592 | G0:0042623 | <1e-4 | s1r1927 | G0:0005575 | <1e-4 | s1r7023 | G0:0008233 | 0.0176 |
| s110280 | G0:0019752 | <1e-4 | s1r1338 | G0:0050789 | <1e-4 | s1r1288 | G0:0022890 | <1e-4 | s1r1070 | G0:0044422 | <1e-4 | s111252 | G0:0008233 | 0.0176 |
| s1r0586 | G0:0016054 | <1e-4 | s1r0458 | G0:0016054 | <1e-4 | s111738 | G0:0015293 | <1e-4 | s1r6066 | G0:0005575 | <1e-4 | s111696 | G0:0008233 | 0.0176 |
| s1r1301 | G0:0051234 | <1e-4 | s1r0575 | G0:0051188 | <1e-4 | ssr6048 | G0:0042623 | <1e-4 | s1r1573 | G0:0005575 | <1e-4 | s111414 | G0:0008233 | 0.0176 |
| s1r1178 | G0:0016052 | <1e-4 | s111131 | G0:0009123 | <1e-4 | s111052 | G0:0022892 | <1e-4 | ssr2962 | G0:0044464 | <1e-4 | ssr6026 | G0:0008233 | 0.0176 |
| s110176 | G0:0009892 | <1e-4 | s111830 | G0:0006721 | <1e-4 | s1r5119 | G0:0015405 | <1e-4 | s1r1737 | G0:0044422 | <1e-4 | s111764 | G0:0008233 | 0.0176 |
| s1r1397 | G0:0048522 | <1e-4 | s1r0337 | G0:0009892 | <1e-4 | s111388 | G0:0015267 | <1e-4 | s110481 | G0:0005575 | <1e-4 | s1r1195 | G0:0008233 | 0.0176 |
| s111233 | G0:0080090 | <1e-4 | s110479 | G0:0080090 | <1e-4 | s1r0964 | G0:0022890 | <1e-4 | s1r1407 | G0:0005575 | <1e-4 | s1r7096 | G0:0008233 | 0.0176 |
| s115004 | G0:0006066 | <1e-4 | s1r0065 | G0:0044260 | <1e-4 | s1r6065 | G0:0022891 | <1e-4 | s110625 | G0:0043226 | <1e-4 | s118002 | G0:0008233 | 0.0176 |
| s1r1577 | G0:0006576 | <1e-4 | s1r1505 | G0:0052111 | <1e-4 | ss10350 | G0:0008171 | <1e-4 | s110615 | G0:0044422 | <1e-4 | s1r1814 | G0:0008233 | 0.0176 |
| s1r5119 | G0:0009056 | <1e-4 | s110982 | G0:0051179 | <1e-4 | s110930 | G0:0015267 | <1e-4 | s1r0954 | G0:0044446 | <1e-4 | s1r1535 | G0:0008233 | 0.0176 |
| ss11520 | G0:0046128 | <1e-4 | s1r1215 | G0:0048878 | <1e-4 | ss13451 | G0:0016818 | <1e-4 | s1r1143 | G0:0005575 | <1e-4 | s1r1342 | G0:0008233 | 0.0176 |
| s1r1066 | G0:0044260 | <1e-4 | s111372 | G0:0009893 | <1e-4 | s1r0609 | G0:0022832 | <1e-4 | ss15015 | G0:0044446 | <1e-4 | s110996 | G0:0042626 | 0.0176 |
| s1r5087 | G0:0019362 | <1e-4 | ss17022 | G0:0048519 | <1e-4 | s1r0589 | G0:0015075 | <1e-4 | s111582 | G0:0044425 | <1e-4 | s111218 | G0:0042626 | 0.0176 |
| s110659 | G0:0009124 | <1e-4 | s111563 | G0:0042455 | <1e-4 | s1r0582 | G0:0015267 | <1e-4 | s111225 | G0:0043226 | <1e-4 | s1r0870 | G0:0008233 | 0.0176 |
| s1r0605 | G0:0009161 | <1e-4 | s111092 | G0:0006576 | <1e-4 | s1r1262 | G0:0015399 | <1e-4 | s111906 | G0:0044424 | <1e-4 | s110630 | G0:0008233 | 0.0176 |
| ssr1528 | G0:0046164 | <1e-4 | ss12733 | G0:0018130 | <1e-4 | s1r0668 | G0:0060089 | <1e-4 | ssr0332 | G0:0043226 | <1e-4 | s1r1407 | G0:0008233 | 0.0176 |
| s1r6063 | G0:0051171 | <1e-4 | s118001 | G0:0044260 | <1e-4 | s1r1471 | G0:0046873 | <1e-4 | s1r0680 | G0:0044446 | <1e-4 | s110802 | G0:0008233 | 0.0176 |
| s1r0291 | G0:0009059 | <1e-4 | s110238 | G0:0009057 | <1e-4 | s1r0514 | G0:0008171 | <1e-4 | s110788 | G0:0044424 | <1e-4 | s1r1674 | G0:0042626 | 0.0176 |
| s110749 | G0:0009259 | <1e-4 | ss11972 | G0:0006091 | <1e-4 | s110505 | G0:0016746 | <1e-4 | s111162 | G0:0044425 | <1e-4 | s1r1566 | G0:0008233 | 0.0176 |
| s111273 | G0:0009987 | <1e-4 | s1r0362 | G0:0031326 | <1e-4 | s110281 | G0:0016462 | <1e-4 | s111135 | G0:0005575 | <1e-4 | s110481 | G0:0008233 | 0.0176 |
| ss12148 | G0:0006733 | <1e-4 | s1r6014 | G0:0044271 | <1e-4 | s1r5018 | G0:0015399 | <1e-4 | s1r0980 | G0:0044464 | <1e-4 | s111884 | G0:0008233 | 0.0176 |
| ssr0536 | G0:0009889 | <1e-4 | s1r0208 | G0:0006091 | <1e-4 | s1r6004 | G0:0043167 | <1e-4 | s110428 | G0:0005575 | <1e-4 | s1r7083 | G0:0008233 | 0.0176 |
| s1r0964 | G0:0046907 | <1e-4 | s110661 | G0:0009132 | <1e-4 | s110608 | G0:0015077 | <1e-4 | s110167 | G0:0044446 | <1e-4 | s1r1956 | G0:0008233 | 0.0176 |
| s117070 | G0:0060255 | <1e-4 | s110886 | G0:0022411 | <1e-4 | s1r1519 | G0:0060089 | <1e-4 | ss17046 | G0:0044446 | <1e-4 | s1r7081 | G0:0008233 | 0.0176 |
| s117067 | G0:0022411 | <1e-4 | s1r0262 | G0:0090304 | <1e-4 | s110858 | G0:0016741 | <1e-4 | s110547 | G0:0005575 | <1e-4 | s110096 | G0:0042626 | 0.0176 |
| s1r0479 | G0:0042451 | <1e-4 | s1r6008 | G0:0009144 | <1e-4 | s110410 | G0:0022803 | <1e-4 | s1r6039 | G0:0044422 | <1e-4 | s111348 | G0:0008233 | 0.0176 |
| s1r1668 | G0:0009124 | <1e-4 | s110558 | G0:0009126 | <1e-4 | s110296 | G0:0015077 | <1e-4 | s1r1614 | G0:0044422 | <1e-4 | s110913 | G0:0008233 | 0.0176 |
| s110198 | G0:0072521 | <1e-4 | s110274 | G0:0034641 | <1e-4 | s1r0609 | G0:0003674 | <1e-4 | s1r1624 | G0:0044422 | <1e-4 | s1r5119 | G0:0008233 | 0.0176 |
| s1r1807 | G0:0019222 | <1e-4 | s1r1033 | G0:0006163 | <1e-4 | s110174 | G0:0015267 | <1e-4 | s111396 | G0:0043226 | <1e-4 | s110282 | G0:0008233 | 0.0176 |
| ssr7084 | G0:0048522 | <1e-4 | s1r1161 | G0:0009144 | <1e-4 | s110788 | G0:0015291 | <1e-4 | s111025 | G0:0044464 | <1e-4 | s1r1505 | G0:0042626 | 0.0176 |
| ss12781 | G0:0072521 | <1e-4 | s110451 | G0:0009987 | <1e-4 | s110659 | G0:0015291 | <1e-4 | ss11972 | G0:0044424 | <1e-4 | s111880 | G0:0008233 | 0.0176 |
| ss12595 | G0:0009150 | <1e-4 | s1r1396 | G0:0043549 | <1e-4 | s1r0232 | G0:0060089 | <1e-4 | s1r1546 | G0:0005575 | <1e-4 | s1r7059 | G0:0008233 | 0.0176 |
| s110361 | G0:0044106 | <1e-4 | s1r1240 | G0:0071496 | <1e-4 | s1r1419 | G0:0022836 | <1e-4 | s111643 | G0:0005575 | <1e-4 | s1r1600 | G0:0008233 | 0.0176 |

|         |            |       |         |            |       |         |            |       |         |            |       |         |            |        |
|---------|------------|-------|---------|------------|-------|---------|------------|-------|---------|------------|-------|---------|------------|--------|
| slr1070 | G0:0051188 | <1e-4 | slr2103 | G0:0009142 | <1e-4 | slr0980 | G0:0015075 | <1e-4 | slr1957 | G0:0044464 | <1e-4 | ssr1499 | G0:0008233 | 0.0176 |
| ss15099 | G0:0006576 | <1e-4 | slr6014 | G0:0042451 | <1e-4 | slr1260 | G0:0015077 | <1e-4 | ss13692 | G0:0044424 | <1e-4 | sl11433 | G0:0042626 | 0.0176 |
| slr6008 | G0:0006091 | <1e-4 | sl11414 | G0:0022607 | <1e-4 | sl10354 | G0:0015405 | <1e-4 | sl10863 | G0:0044464 | <1e-4 | ss12717 | G0:0008233 | 0.0176 |
| sl10676 | G0:0051246 | <1e-4 | slr5024 | G0:0016053 | <1e-4 | sl10905 | G0:0022832 | <1e-4 | ss18028 | G0:0044425 | <1e-4 | slr1150 | G0:0008233 | 0.0176 |
| slr1815 | G0:0034641 | <1e-4 | sl18001 | G0:0042180 | <1e-4 | sl10905 | G0:0015293 | <1e-4 | slr1340 | G0:0044424 | <1e-4 | sl10008 | G0:0008233 | 0.0176 |
| slr1468 | G0:0009161 | <1e-4 | slr1066 | G0:0006091 | <1e-4 | sl10984 | G0:0015291 | <1e-4 | slr1767 | G0:0044446 | <1e-4 | ss10312 | G0:0008233 | 0.0176 |
| slr7025 | G0:0043549 | <1e-4 | ssr2067 | G0:0034654 | <1e-4 | ssr6026 | G0:0016817 | <1e-4 | slr2103 | G0:0044444 | <1e-4 | ss12148 | G0:0008233 | 0.0176 |
| ss12920 | G0:0006576 | <1e-4 | slr1128 | G0:0051188 | <1e-4 | slr1301 | G0:0043492 | <1e-4 | slr7058 | G0:0044464 | <1e-4 | sl10174 | G0:0008233 | 0.0176 |
| slr0366 | G0:0072527 | <1e-4 | ssr8013 | G0:0034654 | <1e-4 | sl10284 | G0:0015399 | <1e-4 | ssr1425 | G0:0044444 | <1e-4 | sl11961 | G0:0008233 | 0.0176 |
| sl11009 | G0:0009165 | <1e-4 | ssr1951 | G0:0022607 | <1e-4 | sl11769 | G0:0016817 | <1e-4 | sl17089 | G0:0044446 | <1e-4 | slr7101 | G0:0008233 | 0.0176 |
| sl11751 | G0:0042451 | <1e-4 | slr0702 | G0:0042451 | <1e-4 | slr0318 | G0:0022836 | <1e-4 | slr0039 | G0:0005575 | <1e-4 | slr0869 | G0:0008233 | 0.0176 |
| sl17066 | G0:0006721 | <1e-4 | ss15100 | G0:0046483 | <1e-4 | sl10230 | G0:0043167 | <1e-4 | slr0184 | G0:0044425 | <1e-4 | ssr2554 | G0:0008233 | 0.0176 |
| sl17033 | G0:0050794 | <1e-4 | sl11401 | G0:0051171 | <1e-4 | sl17089 | G0:0015291 | <1e-4 | slr0751 | G0:0044444 | <1e-4 | ssr3341 | G0:0008233 | 0.0176 |
| sl11738 | G0:0009892 | <1e-4 | sl11155 | G0:0010556 | <1e-4 | sl12013 | G0:0022838 | <1e-4 | slr0483 | G0:0044444 | <1e-4 | ss12009 | G0:0008233 | 0.0176 |
| slr0303 | G0:0009199 | <1e-4 | ssr5020 | G0:0090304 | <1e-4 | sl15097 | G0:0043167 | <1e-4 | slr7092 | G0:0044446 | <1e-4 | ss12245 | G0:0008233 | 0.0176 |
| sl10298 | G0:0044275 | <1e-4 | sl11634 | G0:0016054 | <1e-4 | slr1638 | G0:0022890 | <1e-4 | sl11219 | G0:0043226 | <1e-4 | slr0489 | G0:0008233 | 0.0176 |
| slr0729 | G0:0051186 | <1e-4 | ss18008 | G0:0009394 | <1e-4 | slr0812 | G0:0022891 | <1e-4 | sl10384 | G0:0005575 | <1e-4 | slr0503 | G0:0042626 | 0.0176 |
| sl10325 | G0:0043436 | <1e-4 | slr0602 | G0:0008150 | <1e-4 | slr2084 | G0:0015291 | <1e-4 | sl10328 | G0:0044446 | <1e-4 | slr1397 | G0:0008233 | 0.0176 |
| slr1778 | G0:0009259 | <1e-4 | sl11691 | G0:0034641 | <1e-4 | ss10788 | G0:0015075 | <1e-4 | slr1957 | G0:0044446 | <1e-4 | sl10864 | G0:0042626 | 0.0176 |
| sl10172 | G0:0043412 | <1e-4 | slr0238 | G0:0043549 | <1e-4 | slr0013 | G0:0016818 | <1e-4 | ss10294 | G0:0044444 | <1e-4 | sl11571 | G0:0008233 | 0.0176 |
| sl11350 | G0:0006793 | <1e-4 | slr1081 | G0:0019222 | <1e-4 | sl10775 | G0:0016817 | <1e-4 | slr0145 | G0:0044424 | <1e-4 | ss11972 | G0:0008233 | 0.0176 |
| sl10815 | G0:0050896 | <1e-4 | sl10451 | G0:0072527 | <1e-4 | slr1951 | G0:0043167 | <1e-4 | slr1081 | G0:0044444 | <1e-4 | slr1468 | G0:0008233 | 0.0176 |
| slr6029 | G0:0043170 | <1e-4 | sl10853 | G0:0043933 | <1e-4 | sl10189 | G0:0022832 | <1e-4 | sl10008 | G0:0044425 | <1e-4 | slr1194 | G0:0042626 | 0.0176 |
| slr0232 | G0:0019637 | <1e-4 | sl10676 | G0:0046164 | <1e-4 | slr2103 | G0:0016818 | <1e-4 | ss10312 | G0:0005575 | <1e-4 | sl10443 | G0:0008233 | 0.0176 |
| slr1215 | G0:0009987 | <1e-4 | sl10858 | G0:0072521 | <1e-4 | slr0588 | G0:0016817 | <1e-4 | sl11135 | G0:0044444 | <1e-4 | sl10048 | G0:0008233 | 0.0176 |
| slr0771 | G0:0009199 | <1e-4 | slr6014 | G0:0051716 | <1e-4 | slr0818 | G0:0015293 | <1e-4 | slr7073 | G0:0043226 | <1e-4 | slr1162 | G0:0008233 | 0.0176 |
| slr7012 | G0:0019222 | <1e-4 | slr1087 | G0:0043549 | <1e-4 | slr0596 | G0:0022832 | <1e-4 | slr0890 | G0:0044425 | <1e-4 | ss12920 | G0:0008233 | 0.0176 |
| sl11036 | G0:0072527 | <1e-4 | ssr6083 | G0:0051171 | <1e-4 | slr1033 | G0:0042623 | <1e-4 | sl10864 | G0:0043226 | <1e-4 | slr1306 | G0:0008233 | 0.0176 |
| sl11949 | G0:0016052 | <1e-4 | sl11735 | G0:0042455 | <1e-4 | ss13379 | G0:0015399 | <1e-4 | sl10815 | G0:0043226 | <1e-4 | sl10498 | G0:0008233 | 0.0176 |
| sl10898 | G0:0065007 | <1e-4 | sl17028 | G0:0009308 | <1e-4 | slr1179 | G0:0060089 | <1e-4 | sl10208 | G0:0005575 | <1e-4 | slr7098 | G0:0008233 | 0.0176 |
| slr0270 | G0:0009059 | <1e-4 | slr1505 | G0:0052188 | <1e-4 | sl11106 | G0:0015399 | <1e-4 | sl11609 | G0:0044464 | <1e-4 | slr0157 | G0:0042626 | 0.0176 |
| ssr2912 | G0:0031640 | <1e-4 | sl11714 | G0:0009059 | <1e-4 | sl10085 | G0:0015293 | <1e-4 | slr0941 | G0:0005575 | <1e-4 | slr1533 | G0:0042626 | 0.0176 |
| sl10446 | G0:0006631 | <1e-4 | slr7073 | G0:0009892 | <1e-4 | sl10742 | G0:0022832 | <1e-4 | slr1128 | G0:0043226 | <1e-4 | slr1391 | G0:0042626 | 0.0176 |
| sl11613 | G0:0072528 | <1e-4 | sl11835 | G0:0043170 | <1e-4 | sl11510 | G0:0015293 | <1e-4 | sl11659 | G0:0044444 | <1e-4 | slr0065 | G0:0008233 | 0.0176 |
| ss11004 | G0:0071842 | <1e-4 | ss10832 | G0:0006066 | <1e-4 | ssr8047 | G0:0022891 | <1e-4 | slr1210 | G0:0044425 | <1e-4 | slr1378 | G0:0008233 | 0.0176 |
| slr7102 | G0:0044003 | <1e-4 | slr0199 | G0:0006811 | <1e-4 | ssr0332 | G0:0022838 | <1e-4 | ss18028 | G0:0005575 | <1e-4 | ssr0332 | G0:0008233 | 0.0176 |
| sl11531 | G0:0046394 | <1e-4 | sl10815 | G0:0009987 | <1e-4 | ssr1256 | G0:0016817 | <1e-4 | slr2111 | G0:0005575 | <1e-4 | slr1619 | G0:0008233 | 0.0176 |
| ssr6086 | G0:0044271 | <1e-4 | slr0271 | G0:0051234 | <1e-4 | slr2000 | G0:0022892 | <1e-4 | ssr6062 | G0:0044425 | <1e-4 | ssr5120 | G0:0008233 | 0.0176 |
| ssr8047 | G0:0044003 | <1e-4 | slr1648 | G0:0051818 | <1e-4 | sl15034 | G0:0008171 | <1e-4 | slr0590 | G0:0005575 | <1e-4 | sl11942 | G0:0042626 | 0.0176 |
| sl17086 | G0:0033013 | <1e-4 | slr1169 | G0:0009150 | <1e-4 | ss12471 | G0:0005342 | <1e-4 | slr5077 | G0:0044425 | <1e-4 | ss11520 | G0:0008233 | 0.0176 |
| ssr1256 | G0:0044003 | <1e-4 | slr5016 | G0:0051234 | <1e-4 | ssr3154 | G0:0005342 | <1e-4 | slr0050 | G0:0044425 | <1e-4 | sl10872 | G0:0008233 | 0.0176 |
| slr1726 | G0:0042180 | <1e-4 | ssr1256 | G0:0080090 | <1e-4 | sl10242 | G0:0060089 | <1e-4 | sl17031 | G0:0044424 | <1e-4 | sl18007 | G0:0008233 | 0.0176 |
| sl11530 | G0:0034641 | <1e-4 | slr0476 | G0:0009123 | <1e-4 | sl10558 | G0:0003674 | <1e-4 | sl11954 | G0:0043226 | <1e-4 | sl11062 | G0:0008233 | 0.0176 |
| slr1513 | G0:0044248 | <1e-4 | sl11072 | G0:0009308 | <1e-4 | ssr2201 | G0:0008171 | <1e-4 | sl10493 | G0:0043226 | <1e-4 | sl15032 | G0:0008233 | 0.0176 |
| slr1847 | G0:0034654 | <1e-4 | slr0145 | G0:0019752 | <1e-4 | sl11396 | G0:0015291 | <1e-4 | slr1241 | G0:0044464 | <1e-4 | slr1799 | G0:0042626 | 0.0176 |
| ss12996 | G0:0050896 | <1e-4 | slr1778 | G0:0042455 | <1e-4 | slr0313 | G0:0015293 | <1e-4 | slr1956 | G0:0044424 | <1e-4 | sl11109 | G0:0008233 | 0.0176 |
| slr1611 | G0:0006720 | <1e-4 | ss12971 | G0:0019222 | <1e-4 | ssr1766 | G0:0022836 | <1e-4 | slr0386 | G0:0005575 | <1e-4 | sl10863 | G0:0008233 | 0.0176 |
| sl10188 | G0:0006082 | <1e-4 | slr7102 | G0:0044275 | <1e-4 | sl11155 | G0:0022832 | <1e-4 | sl10024 | G0:0043226 | <1e-4 | slr1097 | G0:0008233 | 0.0176 |
| sl10208 | G0:0050801 | <1e-4 | sl15069 | G0:0008150 | <1e-4 | slr1406 | G0:0043167 | <1e-4 | sl15034 | G0:0044425 | <1e-4 | ssr7036 | G0:0008233 | 0.0176 |
| slr1441 | G0:0051171 | <1e-4 | sl10994 | G0:0031640 | <1e-4 | sl10839 | G0:0022838 | <1e-4 | slr2010 | G0:0044422 | <1e-4 | sl11769 | G0:0008233 | 0.0176 |
| slr1690 | G0:0046907 | <1e-4 | sl12013 | G0:0065007 | <1e-4 | slr1391 | G0:0060089 | <1e-4 | sl17064 | G0:0005575 | <1e-4 | slr1464 | G0:0008233 | 0.0176 |
| slr1396 | G0:0009057 | <1e-4 | sl10871 | G0:0006576 | <1e-4 | slr0238 | G0:0016462 | <1e-4 | slr0195 | G0:0005575 | <1e-4 | sl11396 | G0:0008233 | 0.0176 |
| sl10847 | G0:0043549 | <1e-4 | sl10996 | G0:0071496 | <1e-4 | slr0345 | G0:0015077 | <1e-4 | sl10274 | G0:0005575 | <1e-4 | sl11455 | G0:0042626 | 0.0176 |
| sl18032 | G0:0006091 | <1e-4 | slr1958 | G0:0051186 | <1e-4 | sl10062 | G0:0015267 | <1e-4 | sl17067 | G0:0044425 | <1e-4 | sl11766 | G0:0008233 | 0.0176 |

|          |            |       |          |            |       |          |            |       |          |            |       |          |            |        |
|----------|------------|-------|----------|------------|-------|----------|------------|-------|----------|------------|-------|----------|------------|--------|
| sll1222  | G0:0016053 | <1e-4 | s1r0423  | G0:0072521 | <1e-4 | s1r0148  | G0:0022832 | <1e-4 | s1r1173  | G0:0005575 | <1e-4 | s1r1116  | G0:0008233 | 0.0176 |
| s1r2103  | G0:0019362 | <1e-4 | ss10788  | G0:0065007 | <1e-4 | s1r0981  | G0:0016741 | <1e-4 | ssr0759  | G0:0044424 | <1e-4 | s1r0076  | G0:0042626 | 0.0176 |
| sll1476  | G0:0016052 | <1e-4 | sll10925 | G0:0009262 | <1e-4 | sll11925 | G0:0043167 | <1e-4 | sll10447 | G0:0044444 | <1e-4 | sll10854 | G0:0042626 | 0.0176 |
| s1r1800  | G0:0044283 | <1e-4 | s1r1534  | G0:0046907 | <1e-4 | sll11123 | G0:0016746 | <1e-4 | s1r1603  | G0:0005575 | <1e-4 | sll10846 | G0:0008233 | 0.0176 |
| s1r1365  | G0:0009057 | <1e-4 | s1r1544  | G0:0009308 | <1e-4 | s1r1074  | G0:0015399 | <1e-4 | s1r0742  | G0:0005575 | <1e-4 | sll10181 | G0:0008233 | 0.0176 |
| s1r0589  | G0:0050794 | <1e-4 | sll10910 | G0:0034660 | <1e-4 | ssr1155  | G0:0022891 | <1e-4 | sll10862 | G0:0044444 | <1e-4 | s1r0551  | G0:0042626 | 0.0176 |
| sll10563 | G0:0050794 | <1e-4 | sll10761 | G0:0065007 | <1e-4 | sll11630 | G0:0005342 | <1e-4 | s1r1753  | G0:0005575 | <1e-4 | sll11232 | G0:0008233 | 0.0176 |
| s1r1699  | G0:0071840 | <1e-4 | sll10785 | G0:0043412 | <1e-4 | sll11232 | G0:0015077 | <1e-4 | sll10007 | G0:0044446 | <1e-4 | sll15130 | G0:0008233 | 0.0176 |
| sll10414 | G0:0009161 | <1e-4 | s1r6090  | G0:0009259 | <1e-4 | sll11495 | G0:0043492 | <1e-4 | s1r0455  | G0:0044444 | <1e-4 | ss13692  | G0:0042626 | 0.0176 |
| s1r0870  | G0:0009889 | <1e-4 | ssr2060  | G0:0009132 | <1e-4 | sll10263 | G0:0015291 | <1e-4 | s1r5119  | G0:0044446 | <1e-4 | sll10301 | G0:0042626 | 0.0176 |
| s1r0360  | G0:0009309 | <1e-4 | sll10071 | G0:0018130 | <1e-4 | s1r6044  | G0:0015267 | <1e-4 | s1r1932  | G0:0005575 | <1e-4 | sll11485 | G0:0008233 | 0.0176 |
| ssr5020  | G0:0005996 | <1e-4 | sll11691 | G0:0044281 | <1e-4 | s1r0147  | G0:0022890 | <1e-4 | sll10787 | G0:0005575 | <1e-4 | s1r5023  | G0:0008233 | 0.0176 |
| s1r1676  | G0:0031323 | <1e-4 | sll11306 | G0:0006733 | <1e-4 | sll10658 | G0:0022892 | <1e-4 | sll11632 | G0:0044446 | <1e-4 | sll11461 | G0:0008233 | 0.0176 |
| s1r1865  | G0:0072524 | <1e-4 | s1r1450  | G0:0044106 | <1e-4 | s1r0606  | G0:0043167 | <1e-4 | sll10424 | G0:0005575 | <1e-4 | s1r1419  | G0:0008233 | 0.0176 |
| ssr6078  | G0:0044255 | <1e-4 | sll10442 | G0:0051246 | <1e-4 | s1r0468  | G0:0015291 | <1e-4 | sll18040 | G0:0044446 | <1e-4 | s1r1484  | G0:0008233 | 0.0176 |
| sll11634 | G0:0034654 | <1e-4 | s1r2011  | G0:0051179 | <1e-4 | sll10910 | G0:0015293 | <1e-4 | sll10984 | G0:0044422 | <1e-4 | s1r7011  | G0:0008233 | 0.0176 |
| sll10174 | G0:0048518 | <1e-4 | s1r1034  | G0:0048519 | <1e-4 | ssr3410  | G0:0016462 | <1e-4 | s1r1353  | G0:0044444 | <1e-4 | sll10487 | G0:0008233 | 0.0176 |
| s1r2025  | G0:0044003 | <1e-4 | sll16054 | G0:0001932 | <1e-4 | ss10294  | G0:0016462 | <1e-4 | s1r1923  | G0:0005575 | <1e-4 | s1r1263  | G0:0008233 | 0.0176 |
| sll11203 | G0:0008150 | <1e-4 | sll10735 | G0:0048522 | <1e-4 | s1r1464  | G0:0016462 | <1e-4 | sll17033 | G0:0005575 | <1e-4 | s1r0569  | G0:0008233 | 0.0176 |
| s1r6015  | G0:0009117 | <1e-4 | ssr1766  | G0:0009059 | <1e-4 | s1r1590  | G0:0015075 | <1e-4 | s1r0503  | G0:0044444 | <1e-4 | s1r0751  | G0:0008233 | 0.0176 |
| s1r2003  | G0:0009057 | <1e-4 | sll11486 | G0:0009059 | <1e-4 | sll11265 | G0:0003674 | <1e-4 | sll10606 | G0:0043226 | <1e-4 | s1r1659  | G0:0042626 | 0.0176 |
| s1r1944  | G0:0090304 | <1e-4 | ss10483  | G0:0046483 | <1e-4 | s1r1127  | G0:0022836 | <1e-4 | s1r1464  | G0:0044446 | <1e-4 | s1r1398  | G0:0042626 | 0.0176 |
| ss15027  | G0:0009161 | <1e-4 | sll10410 | G0:0016053 | <1e-4 | ss13383  | G0:0016741 | <1e-4 | sll10263 | G0:0043226 | <1e-4 | sll11265 | G0:0008233 | 0.0176 |
| s1r1398  | G0:0052188 | <1e-4 | s1r0333  | G0:0009199 | <1e-4 | ss16092  | G0:0016818 | <1e-4 | ss15045  | G0:0044424 | <1e-4 | sll11060 | G0:0042626 | 0.0176 |
| ssr1558  | G0:0046128 | <1e-4 | s1r1195  | G0:0034654 | <1e-4 | s1r1704  | G0:0005342 | <1e-4 | sll17028 | G0:0044464 | <1e-4 | s1r0168  | G0:0008233 | 0.0176 |
| s1r6071  | G0:0022607 | <1e-4 | sll10487 | G0:0006720 | <1e-4 | sll10181 | G0:0016462 | <1e-4 | s1r1116  | G0:0044444 | <1e-4 | sll10444 | G0:0008233 | 0.0176 |
| s1r1774  | G0:0044003 | <1e-4 | sll11380 | G0:0009161 | <1e-4 | sll10702 | G0:0003674 | <1e-4 | s1r1023  | G0:0043226 | <1e-4 | sg10001  | G0:0008233 | 0.0176 |
| s1r0769  | G0:0009309 | <1e-4 | s1r1572  | G0:0009057 | <1e-4 | sll15026 | G0:0015291 | <1e-4 | sll11106 | G0:0044422 | <1e-4 | s1r0818  | G0:0008168 | 0.0174 |
| s1r0789  | G0:0009123 | <1e-4 | s1r1143  | G0:0033013 | <1e-4 | sll11267 | G0:0016462 | <1e-4 | sll10384 | G0:0044422 | <1e-4 | sll11222 | G0:0008168 | 0.0174 |
| ssr6024  | G0:0048878 | <1e-4 | sll10265 | G0:0071840 | <1e-4 | ss17038  | G0:0042623 | <1e-4 | sll11188 | G0:0044446 | <1e-4 | s1r1773  | G0:0008168 | 0.0174 |
| sll11526 | G0:0042455 | <1e-4 | s1r1690  | G0:0071496 | <1e-4 | sll10564 | G0:0022857 | <1e-4 | sll11054 | G0:0044422 | <1e-4 | s1r1591  | G0:0008168 | 0.0174 |
| sll11072 | G0:0005996 | <1e-4 | ssr7079  | G0:0051186 | <1e-4 | sll11956 | G0:0022832 | <1e-4 | s1r0109  | G0:0044444 | <1e-4 | sll11527 | G0:0005975 | 0.0173 |
| s1r2118  | G0:0048518 | <1e-4 | sll11054 | G0:0019637 | <1e-4 | sll11532 | G0:0043167 | <1e-4 | sll10249 | G0:0005575 | <1e-4 | sll10350 | G0:0005975 | 0.0173 |
| sll11873 | G0:0009309 | <1e-4 | sll11109 | G0:0019222 | <1e-4 | sll11486 | G0:0060089 | <1e-4 | s1r1563  | G0:0044425 | <1e-4 | ssr3571  | G0:0016874 | 0.0173 |
| ss10352  | G0:0071496 | <1e-4 | s1r0208  | G0:0009056 | <1e-4 | s1r0845  | G0:0005342 | <1e-4 | s1r2012  | G0:0044425 | <1e-4 | s1r1230  | G0:0016874 | 0.0173 |
| sll17065 | G0:0009124 | <1e-4 | sll11135 | G0:0033013 | <1e-4 | s1r0888  | G0:0016817 | <1e-4 | s1r0607  | G0:0043226 | <1e-4 | sll10456 | G0:0016874 | 0.0173 |
| sll11505 | G0:0043933 | <1e-4 | sll10572 | G0:0006721 | <1e-4 | sll11530 | G0:0005342 | <1e-4 | sll11429 | G0:0044425 | <1e-4 | sll11835 | G0:0016874 | 0.0173 |
| s1r1263  | G0:0080090 | <1e-4 | sll10785 | G0:0034660 | <1e-4 | s1r2115  | G0:0043167 | <1e-4 | sll11390 | G0:0005575 | <1e-4 | sll11656 | G0:0016874 | 0.0173 |
| sll11510 | G0:0052111 | <1e-4 | ssr3122  | G0:0019362 | <1e-4 | sll11775 | G0:0016818 | <1e-4 | sll10558 | G0:0005575 | <1e-4 | s1r0872  | G0:0016874 | 0.0173 |
| sll10688 | G0:0055082 | <1e-4 | sll11071 | G0:0019751 | <1e-4 | s1r1788  | G0:0016462 | <1e-4 | s1r1240  | G0:0044444 | <1e-4 | sll11608 | G0:0016874 | 0.0173 |
| ssr1951  | G0:0006631 | <1e-4 | s1r1956  | G0:0009132 | <1e-4 | s1r1419  | G0:0043167 | <1e-4 | s1r7011  | G0:0044446 | <1e-4 | s1r1084  | G0:0016874 | 0.0173 |
| sll11130 | G0:0065007 | <1e-4 | sll11681 | G0:0009893 | <1e-4 | sll10625 | G0:0022892 | <1e-4 | ssr3532  | G0:0044464 | <1e-4 | ssr2755  | G0:0016874 | 0.0173 |
| s1r6087  | G0:0044248 | <1e-4 | sll10479 | G0:0006220 | <1e-4 | s1r0656  | G0:0022892 | <1e-4 | sll10982 | G0:0044425 | <1e-4 | s1r1593  | G0:0016874 | 0.0173 |
| sll11251 | G0:0072527 | <1e-4 | ss11690  | G0:0050896 | <1e-4 | s1r1557  | G0:0016462 | <1e-4 | s1r1342  | G0:0044424 | <1e-4 | sll11630 | G0:0016874 | 0.0173 |
| sll10564 | G0:0046164 | <1e-4 | ssr2711  | G0:0006793 | <1e-4 | s1r1177  | G0:0015399 | <1e-4 | s1r0431  | G0:0044444 | <1e-4 | s1r0103  | G0:0016874 | 0.0173 |
| sll17033 | G0:0051179 | <1e-4 | sll11348 | G0:0009161 | <1e-4 | sll11609 | G0:0015291 | <1e-4 | sll11225 | G0:0044425 | <1e-4 | s1r1778  | G0:0016874 | 0.0173 |
| ss17022  | G0:0006793 | <1e-4 | sll10676 | G0:0051347 | <1e-4 | sll15061 | G0:0015405 | <1e-4 | ss11520  | G0:0005575 | <1e-4 | s1r0294  | G0:0016874 | 0.0173 |
| sll11424 | G0:0009057 | <1e-4 | sll18032 | G0:0009309 | <1e-4 | ss16035  | G0:0043167 | <1e-4 | s1r6044  | G0:0044422 | <1e-4 | sll10177 | G0:0016874 | 0.0173 |
| ssr7036  | G0:0006753 | <1e-4 | s1r1677  | G0:0071842 | <1e-4 | sll10372 | G0:0003674 | <1e-4 | sll11934 | G0:0043226 | <1e-4 | ss10352  | G0:0016874 | 0.0173 |
| s1r5112  | G0:0019222 | <1e-4 | sll11956 | G0:0031640 | <1e-4 | s1r1627  | G0:0015405 | <1e-4 | sll10183 | G0:0044424 | <1e-4 | s1r1932  | G0:0016874 | 0.0173 |
| sll10864 | G0:0009124 | <1e-4 | s1r0815  | G0:0043648 | <1e-4 | sll11995 | G0:0022890 | <1e-4 | s1r0313  | G0:0005575 | <1e-4 | sll11658 | G0:0016874 | 0.0173 |
| s1r1875  | G0:0050801 | <1e-4 | sll10319 | G0:0008610 | <1e-4 | sll11486 | G0:0008171 | <1e-4 | sll11442 | G0:0043226 | <1e-4 | ss10242  | G0:0016874 | 0.0173 |
| sll11068 | G0:0009309 | <1e-4 | sll17033 | G0:0044282 | <1e-4 | sll10044 | G0:0060089 | <1e-4 | sll11880 | G0:0043226 | <1e-4 | s1r1073  | G0:0016874 | 0.0173 |
| sll15047 | G0:0051818 | <1e-4 | sll10442 | G0:0019752 | <1e-4 | s1r1768  | G0:0022857 | <1e-4 | sll17086 | G0:0044444 | <1e-4 | s1r0144  | G0:0016874 | 0.0173 |

|          |            |       |         |            |       |         |            |       |         |            |       |         |            |        |
|----------|------------|-------|---------|------------|-------|---------|------------|-------|---------|------------|-------|---------|------------|--------|
| slr0553  | G0:0051186 | <1e-4 | sl11531 | G0:0050896 | <1e-4 | ssl1972 | G0:0043167 | <1e-4 | slr0594 | G0:0044422 | <1e-4 | sl11965 | G0:0016874 | 0.0173 |
| ssl17022 | G0:0051186 | <1e-4 | slr1852 | G0:0044282 | <1e-4 | slr1544 | G0:0022836 | <1e-4 | sl10160 | G0:0005575 | <1e-4 | sl10314 | G0:0016874 | 0.0173 |
| ssl13383 | G0:0006733 | <1e-4 | slr0907 | G0:0043648 | <1e-4 | ssr3467 | G0:0003674 | <1e-4 | sl18019 | G0:0044446 | <1e-4 | slr0770 | G0:0016874 | 0.0173 |
| slr1917  | G0:0044248 | <1e-4 | sl11586 | G0:0034654 | <1e-4 | sl11751 | G0:0005342 | <1e-4 | slr1652 | G0:0044425 | <1e-4 | slr0431 | G0:0016874 | 0.0173 |
| sl11009  | G0:0065007 | <1e-4 | sl11086 | G0:0052188 | <1e-4 | slr0408 | G0:0016462 | <1e-4 | sl10932 | G0:0043226 | <1e-4 | sl11761 | G0:0016874 | 0.0173 |
| slr0888  | G0:0072527 | <1e-4 | slr1117 | G0:0050794 | <1e-4 | slr1033 | G0:0016818 | <1e-4 | sl11350 | G0:0044425 | <1e-4 | slr0723 | G0:0016874 | 0.0173 |
| sl11552  | G0:0009117 | <1e-4 | sl10827 | G0:0009123 | <1e-4 | slr1977 | G0:0008171 | <1e-4 | slr1566 | G0:0044425 | <1e-4 | sl10085 | G0:0016874 | 0.0173 |
| ssr2803  | G0:0051188 | <1e-4 | sl15109 | G0:0006066 | <1e-4 | sl11880 | G0:0015405 | <1e-4 | slr0142 | G0:0005575 | <1e-4 | ssr2615 | G0:0016874 | 0.0173 |
| slr2027  | G0:0044248 | <1e-4 | slr1168 | G0:0009893 | <1e-4 | ssr6026 | G0:0016462 | <1e-4 | ssl0788 | G0:0044464 | <1e-4 | sl10237 | G0:0016874 | 0.0173 |
| sl15046  | G0:0034641 | <1e-4 | slr0168 | G0:0019751 | <1e-4 | slr1276 | G0:0043167 | <1e-4 | slr0374 | G0:0044422 | <1e-4 | sl11006 | G0:0016874 | 0.0173 |
| ssr0332  | G0:0019219 | <1e-4 | slr5119 | G0:0009987 | <1e-4 | slr1062 | G0:0005342 | <1e-4 | slr1307 | G0:0044446 | <1e-4 | slr0941 | G0:0016874 | 0.0173 |
| sl11926  | G0:0072521 | <1e-4 | slr1431 | G0:0009262 | <1e-4 | sl11765 | G0:0022890 | <1e-4 | slr6007 | G0:0005575 | <1e-4 | slr0023 | G0:0016874 | 0.0173 |
| slr6088  | G0:0006163 | <1e-4 | sl15067 | G0:0048518 | <1e-4 | slr1188 | G0:0015291 | <1e-4 | ssr2009 | G0:0044424 | <1e-4 | sl11442 | G0:0016874 | 0.0173 |
| sl10595  | G0:0009309 | <1e-4 | slr0981 | G0:0048522 | <1e-4 | sl10762 | G0:0015291 | <1e-4 | ssr2551 | G0:0005575 | <1e-4 | slr0360 | G0:0016874 | 0.0173 |
| sl10335  | G0:0019637 | <1e-4 | sl11396 | G0:0022411 | <1e-4 | sl10609 | G0:0015077 | <1e-4 | slr1926 | G0:0044464 | <1e-4 | sl11563 | G0:0016874 | 0.0173 |
| slr7023  | G0:0009263 | <1e-4 | slr0287 | G0:0006753 | <1e-4 | sl10552 | G0:0016462 | <1e-4 | sl10010 | G0:0044444 | <1e-4 | slr1436 | G0:0016874 | 0.0173 |
| ssr5019  | G0:0009057 | <1e-4 | sl10192 | G0:0051171 | <1e-4 | sl11285 | G0:0015291 | <1e-4 | sl11191 | G0:0044444 | <1e-4 | sl10756 | G0:0016874 | 0.0173 |
| slr0645  | G0:0019219 | <1e-4 | slr0975 | G0:0008150 | <1e-4 | sl10558 | G0:0008171 | <1e-4 | slr1907 | G0:0044446 | <1e-4 | sl10176 | G0:0006950 | 0.0167 |
| slr1177  | G0:0071496 | <1e-4 | sl10243 | G0:0044282 | <1e-4 | slr0978 | G0:0022832 | <1e-4 | sl11735 | G0:0005575 | <1e-4 | slr5023 | G0:0006950 | 0.0167 |
| ssr5106  | G0:0006082 | <1e-4 | slr1790 | G0:0006732 | <1e-4 | slr1025 | G0:0022832 | <1e-4 | sl11912 | G0:0044444 | <1e-4 | sl10710 | G0:0006950 | 0.0167 |
| slr0962  | G0:0048522 | <1e-4 | slr0888 | G0:0071840 | <1e-4 | slr1913 | G0:0008171 | <1e-4 | slr0806 | G0:0005575 | <1e-4 | ssr2422 | G0:0006950 | 0.0167 |
| slr2105  | G0:0009259 | <1e-4 | sl10243 | G0:0009124 | <1e-4 | slr5102 | G0:0043492 | <1e-4 | sl11763 | G0:0044424 | <1e-4 | sl11511 | G0:0006950 | 0.0167 |
| sl11009  | G0:0048878 | <1e-4 | ssr6030 | G0:0043436 | <1e-4 | slr1056 | G0:0022803 | <1e-4 | sl11749 | G0:0044424 | <1e-4 | sl10518 | G0:0006950 | 0.0167 |
| ssl5096  | G0:0051246 | <1e-4 | sl10216 | G0:0006793 | <1e-4 | sl11882 | G0:0022832 | <1e-4 | slr0364 | G0:0044464 | <1e-4 | slr1162 | G0:0006950 | 0.0167 |
| slr7095  | G0:0044003 | <1e-4 | slr7026 | G0:0031323 | <1e-4 | slr1397 | G0:0043167 | <1e-4 | sl10862 | G0:0044424 | <1e-4 | slr6015 | G0:0006950 | 0.0167 |
| sl11830  | G0:0009259 | <1e-4 | slr0887 | G0:0009893 | <1e-4 | sl11511 | G0:0015291 | <1e-4 | sl11717 | G0:0005575 | <1e-4 | ssl5007 | G0:0006950 | 0.0167 |
| sl11735  | G0:0009126 | <1e-4 | sl11158 | G0:0071840 | <1e-4 | slr7012 | G0:0015399 | <1e-4 | sl11217 | G0:0005575 | <1e-4 | slr0912 | G0:0006950 | 0.0167 |
| sl11938  | G0:0009124 | <1e-4 | sl11024 | G0:0048518 | <1e-4 | ssr2912 | G0:0022832 | <1e-4 | ssl1498 | G0:0005575 | <1e-4 | sl11691 | G0:0006950 | 0.0167 |
| ssr2611  | G0:0090304 | <1e-4 | slr0607 | G0:0051716 | <1e-4 | sl11151 | G0:0016741 | <1e-4 | sl10456 | G0:0044425 | <1e-4 | sl15062 | G0:0006950 | 0.0167 |
| sl10448  | G0:0034660 | <1e-4 | sl11400 | G0:0052111 | <1e-4 | ssr3572 | G0:0042623 | <1e-4 | sl10442 | G0:0044422 | <1e-4 | sl11469 | G0:0006950 | 0.0167 |
| slr1222  | G0:0009056 | <1e-4 | slr0483 | G0:0006793 | <1e-4 | sl11956 | G0:0015399 | <1e-4 | sl11062 | G0:0044425 | <1e-4 | slr0146 | G0:0006950 | 0.0167 |
| slr0482  | G0:0044260 | <1e-4 | sl10473 | G0:0009150 | <1e-4 | slr6008 | G0:0060089 | <1e-4 | ssl0739 | G0:0044446 | <1e-4 | sl11757 | G0:0006950 | 0.0167 |
| slr1340  | G0:0019752 | <1e-4 | slr1468 | G0:0043436 | <1e-4 | slr6065 | G0:0016462 | <1e-4 | ssl0461 | G0:0044446 | <1e-4 | sl10024 | G0:0006950 | 0.0167 |
| sl11934  | G0:0009308 | <1e-4 | sl10372 | G0:0051186 | <1e-4 | sl10314 | G0:0022803 | <1e-4 | sl15062 | G0:0005575 | <1e-4 | slr1660 | G0:0006950 | 0.0167 |
| sl11698  | G0:0042451 | <1e-4 | slr1907 | G0:0050801 | <1e-4 | slr0440 | G0:0043167 | <1e-4 | ssr2998 | G0:0044444 | <1e-4 | slr1546 | G0:0006950 | 0.0167 |
| slr0217  | G0:0019752 | <1e-4 | sl10189 | G0:0051347 | <1e-4 | sl11251 | G0:0015293 | <1e-4 | slr0935 | G0:0044464 | <1e-4 | ssl0461 | G0:0006950 | 0.0167 |
| slr0498  | G0:0009142 | <1e-4 | ssr2802 | G0:0065007 | <1e-4 | ssr1256 | G0:0016462 | <1e-4 | slr5013 | G0:0044425 | <1e-4 | slr0151 | G0:0006950 | 0.0167 |
| sl11570  | G0:0006720 | <1e-4 | slr1162 | G0:0051186 | <1e-4 | slr0104 | G0:0015405 | <1e-4 | slr7010 | G0:0044422 | <1e-4 | sl11401 | G0:0006950 | 0.0167 |
| slr0407  | G0:0001932 | <1e-4 | slr1657 | G0:0006091 | <1e-4 | slr1676 | G0:0015267 | <1e-4 | slr2073 | G0:0043226 | <1e-4 | slr0398 | G0:0006950 | 0.0167 |
| ssr6062  | G0:0016054 | <1e-4 | sl10297 | G0:0031326 | <1e-4 | slr1886 | G0:0022836 | <1e-4 | ssr3572 | G0:0043226 | <1e-4 | sl10658 | G0:0006950 | 0.0167 |
| slr0582  | G0:0006066 | <1e-4 | ssl7042 | G0:0043170 | <1e-4 | sl10985 | G0:0015399 | <1e-4 | ssl3382 | G0:0044446 | <1e-4 | slr7080 | G0:0006950 | 0.0167 |
| sl10505  | G0:0051716 | <1e-4 | slr0273 | G0:0043648 | <1e-4 | sl10606 | G0:0015293 | <1e-4 | ssr0109 | G0:0044464 | <1e-4 | sl15034 | G0:0006950 | 0.0167 |
| sl11254  | G0:0080090 | <1e-4 | slr1025 | G0:0005996 | <1e-4 | slr1507 | G0:0016746 | <1e-4 | sl10913 | G0:0005575 | <1e-4 | slr6014 | G0:0006950 | 0.0167 |
| slr0517  | G0:0050794 | <1e-4 | slr1572 | G0:0005996 | <1e-4 | sl11162 | G0:0015077 | <1e-4 | sl11411 | G0:0044446 | <1e-4 | ssr3341 | G0:0006950 | 0.0167 |
| slr0668  | G0:0031323 | <1e-4 | slr2103 | G0:0009263 | <1e-4 | sl10296 | G0:0016746 | <1e-4 | slr0249 | G0:0005575 | <1e-4 | sl11378 | G0:0006950 | 0.0167 |
| sl10558  | G0:0019362 | <1e-4 | sl10266 | G0:0009889 | <1e-4 | ssr2615 | G0:0003674 | <1e-4 | slr1397 | G0:0044464 | <1e-4 | slr0337 | G0:0006950 | 0.0167 |
| sl10939  | G0:0009165 | <1e-4 | sl11193 | G0:0006082 | <1e-4 | sl10063 | G0:0015075 | <1e-4 | ssl5064 | G0:0044464 | <1e-4 | sl11025 | G0:0006950 | 0.0167 |
| sl18007  | G0:0033013 | <1e-4 | sl17089 | G0:0022607 | <1e-4 | slr1577 | G0:0016462 | <1e-4 | slr1576 | G0:0044444 | <1e-4 | ssl8005 | G0:0006950 | 0.0167 |
| slr5102  | G0:0009889 | <1e-4 | sl11853 | G0:0043549 | <1e-4 | sl11052 | G0:0043492 | <1e-4 | sl10615 | G0:0005575 | <1e-4 | slr0195 | G0:0006950 | 0.0167 |
| slr5016  | G0:0065007 | <1e-4 | sl18019 | G0:0016054 | <1e-4 | sl10931 | G0:0016462 | <1e-4 | sl11825 | G0:0044425 | <1e-4 | sl18004 | G0:0006950 | 0.0167 |
| slr1752  | G0:0045184 | <1e-4 | slr1462 | G0:0008150 | <1e-4 | slr0147 | G0:0060089 | <1e-4 | sl11447 | G0:0044444 | <1e-4 | slr2010 | G0:0006950 | 0.0167 |
| slr2000  | G0:0006811 | <1e-4 | slr0264 | G0:0019752 | <1e-4 | sl10543 | G0:0016746 | <1e-4 | slr1762 | G0:0044464 | <1e-4 | sl10802 | G0:0006950 | 0.0167 |
| sl10585  | G0:0019751 | <1e-4 | slr0801 | G0:0009892 | <1e-4 | sl10861 | G0:0022836 | <1e-4 | sl10641 | G0:0005575 | <1e-4 | slr0606 | G0:0006950 | 0.0167 |
| sl10678  | G0:0043412 | <1e-4 | slr2060 | G0:0006720 | <1e-4 | ssl2807 | G0:0022891 | <1e-4 | sl10751 | G0:0005575 | <1e-4 | slr6013 | G0:0006950 | 0.0167 |

|          |            |       |          |            |       |          |            |       |          |            |       |          |            |        |
|----------|------------|-------|----------|------------|-------|----------|------------|-------|----------|------------|-------|----------|------------|--------|
| slr0366  | G0:0052188 | <1e-4 | ssl0109  | G0:0051347 | <1e-4 | slr0291  | G0:0043167 | <1e-4 | ssl1514  | G0:0043226 | <1e-4 | slr11092 | G0:0006950 | 0.0167 |
| slr0479  | G0:0046907 | <1e-4 | slr1799  | G0:0033013 | <1e-4 | slr1674  | G0:0015077 | <1e-4 | slr1169  | G0:0044422 | <1e-4 | slr0333  | G0:0006950 | 0.0167 |
| slr11784 | G0:0050896 | <1e-4 | slr6016  | G0:0009142 | <1e-4 | slr10263 | G0:0022832 | <1e-4 | slr7095  | G0:0005575 | <1e-4 | slr6100  | G0:0006950 | 0.0167 |
| slr11884 | G0:0051188 | <1e-4 | ssl2420  | G0:0044283 | <1e-4 | slr10547 | G0:0022838 | <1e-4 | slr1573  | G0:0044444 | <1e-4 | slr6049  | G0:0006950 | 0.0167 |
| slr11915 | G0:0046128 | <1e-4 | ssr3409  | G0:0072521 | <1e-4 | slr1413  | G0:0022838 | <1e-4 | slr1174  | G0:0005575 | <1e-4 | ssr3189  | G0:0006950 | 0.0167 |
| ssr6024  | G0:0009123 | <1e-4 | slr7016  | G0:0052111 | <1e-4 | slr11381 | G0:0016818 | <1e-4 | slr11203 | G0:0043226 | <1e-4 | slr0059  | G0:0006950 | 0.0167 |
| slr10584 | G0:0060255 | <1e-4 | slr1940  | G0:0006766 | <1e-4 | slr10843 | G0:0015291 | <1e-4 | slr0962  | G0:0044425 | <1e-4 | slr1068  | G0:0006950 | 0.0167 |
| slr10280 | G0:0006811 | <1e-4 | slr10860 | G0:0016054 | <1e-4 | slr0816  | G0:0015293 | <1e-4 | ssl1378  | G0:0044464 | <1e-4 | slr10815 | G0:0006950 | 0.0167 |
| ssl15100 | G0:0051347 | <1e-4 | slr11531 | G0:0009132 | <1e-4 | slr1097  | G0:0008171 | <1e-4 | slr17050 | G0:0044424 | <1e-4 | slr1957  | G0:0006950 | 0.0167 |
| slr0848  | G0:0046164 | <1e-4 | slr10532 | G0:0009141 | <1e-4 | slr0602  | G0:0016741 | <1e-4 | slr10864 | G0:0044425 | <1e-4 | slr12015 | G0:0006950 | 0.0167 |
| slr11954 | G0:0006753 | <1e-4 | ssr2067  | G0:0043648 | <1e-4 | slr1128  | G0:0016462 | <1e-4 | ssl2420  | G0:0044464 | <1e-4 | slr15046 | G0:0006950 | 0.0167 |
| slr0404  | G0:0009059 | <1e-4 | ssr2975  | G0:0009987 | <1e-4 | slr0476  | G0:0015267 | <1e-4 | slr1566  | G0:0005575 | <1e-4 | slr1186  | G0:0006950 | 0.0167 |
| slr10780 | G0:0009889 | <1e-4 | slr10225 | G0:0034641 | <1e-4 | slr10488 | G0:0016817 | <1e-4 | slr11969 | G0:0044424 | <1e-4 | slr11130 | G0:0006950 | 0.0167 |
| slr10310 | G0:0072527 | <1e-4 | slr11652 | G0:0033013 | <1e-4 | ssr6027  | G0:0015291 | <1e-4 | slr1062  | G0:0044446 | <1e-4 | slr10760 | G0:0006950 | 0.0167 |
| slr5087  | G0:0055082 | <1e-4 | slr11222 | G0:0050794 | <1e-4 | ssr2422  | G0:0043167 | <1e-4 | slr10498 | G0:0044425 | <1e-4 | ssr0332  | G0:0006950 | 0.0167 |
| ssl12065 | G0:0001932 | <1e-4 | slr11089 | G0:0016053 | <1e-4 | slr11455 | G0:0015291 | <1e-4 | slr1223  | G0:0005575 | <1e-4 | slr0655  | G0:0006950 | 0.0167 |
| ssr1698  | G0:0072522 | <1e-4 | ssr2781  | G0:0009987 | <1e-4 | ssr0692  | G0:0015399 | <1e-4 | slr6101  | G0:0044446 | <1e-4 | slr1557  | G0:0016874 | 0.0167 |
| slr0053  | G0:0008150 | <1e-4 | slr18033 | G0:0009124 | <1e-4 | slr10863 | G0:0016818 | <1e-4 | slr0423  | G0:0005575 | <1e-4 | slr0076  | G0:0016874 | 0.0167 |
| slr10732 | G0:0043933 | <1e-4 | slr10327 | G0:0009124 | <1e-4 | ssr6086  | G0:0022832 | <1e-4 | slr0270  | G0:0044424 | <1e-4 | slr1127  | G0:0016874 | 0.0167 |
| slr10191 | G0:0009260 | <1e-4 | slr1657  | G0:0009259 | <1e-4 | ssr5106  | G0:0008171 | <1e-4 | slr11902 | G0:0005575 | <1e-4 | slr10360 | G0:0016874 | 0.0167 |
| slr1376  | G0:0051179 | <1e-4 | slr11352 | G0:0006091 | <1e-4 | slr1236  | G0:0015291 | <1e-4 | ssr1768  | G0:0044422 | <1e-4 | slr11472 | G0:0016874 | 0.0167 |
| slr0730  | G0:0048523 | <1e-4 | slr10172 | G0:0048522 | <1e-4 | slr0870  | G0:0016746 | <1e-4 | slr11062 | G0:0043226 | <1e-4 | slr11222 | G0:0016772 | 0.0167 |
| slr10428 | G0:0001932 | <1e-4 | slr1081  | G0:0090304 | <1e-4 | slr10867 | G0:0016741 | <1e-4 | slr0787  | G0:0044444 | <1e-4 | slr0545  | G0:0016874 | 0.0167 |
| slr1674  | G0:0006066 | <1e-4 | slr10022 | G0:0008150 | <1e-4 | slr1599  | G0:0003674 | <1e-4 | slr10923 | G0:0005575 | <1e-4 | slr11247 | G0:0016874 | 0.0167 |
| slr6088  | G0:0046394 | <1e-4 | ssr1375  | G0:0006733 | <1e-4 | slr11252 | G0:0015075 | <1e-4 | slr1768  | G0:0005575 | <1e-4 | slr10735 | G0:0016772 | 0.0167 |
| slr10743 | G0:0042455 | <1e-4 | ssl0312  | G0:0050801 | <1e-4 | ssl1255  | G0:0016462 | <1e-4 | slr10265 | G0:0044446 | <1e-4 | slr1353  | G0:0016874 | 0.0167 |
| slr1658  | G0:0033013 | <1e-4 | ssr2803  | G0:0042180 | <1e-4 | slr10803 | G0:0005342 | <1e-4 | slr0709  | G0:0044444 | <1e-4 | slr1612  | G0:0016874 | 0.0167 |
| slr1288  | G0:0042180 | <1e-4 | slr6029  | G0:0019637 | <1e-4 | slr10410 | G0:0008171 | <1e-4 | slr10031 | G0:0005575 | <1e-4 | slr11426 | G0:0016874 | 0.0167 |
| slr2011  | G0:0009260 | <1e-4 | slr1275  | G0:0042180 | <1e-4 | ssr3532  | G0:0022857 | <1e-4 | slr11267 | G0:0043226 | <1e-4 | slr11601 | G0:0016874 | 0.0167 |
| slr10263 | G0:0051818 | <1e-4 | slr11797 | G0:0051347 | <1e-4 | slr0592  | G0:0043492 | <1e-4 | slr0514  | G0:0005575 | <1e-4 | slr1918  | G0:0016874 | 0.0167 |
| slr10023 | G0:0046394 | <1e-4 | slr1449  | G0:0044271 | <1e-4 | slr1122  | G0:0060089 | <1e-4 | slr17069 | G0:0043226 | <1e-4 | slr1196  | G0:0016874 | 0.0167 |
| slr1557  | G0:0006720 | <1e-4 | slr11858 | G0:0006732 | <1e-4 | slr0209  | G0:0022832 | <1e-4 | slr11318 | G0:0044446 | <1e-4 | slr10382 | G0:0016874 | 0.0167 |
| slr1444  | G0:0034654 | <1e-4 | ssl1923  | G0:0009991 | <1e-4 | slr11110 | G0:0008171 | <1e-4 | slr1956  | G0:0044425 | <1e-4 | ssl0787  | G0:0016874 | 0.0167 |
| slr10737 | G0:0050789 | <1e-4 | slr10175 | G0:0006732 | <1e-4 | slr0169  | G0:0015291 | <1e-4 | slr7016  | G0:0043226 | <1e-4 | slr1066  | G0:0016874 | 0.0167 |
| slr10572 | G0:0055114 | <1e-4 | ssl18028 | G0:0050801 | <1e-4 | slr15028 | G0:0003674 | <1e-4 | slr10176 | G0:0044424 | <1e-4 | slr1083  | G0:0016874 | 0.0167 |
| slr0476  | G0:0055086 | <1e-4 | slr18002 | G0:0009144 | <1e-4 | slr10781 | G0:0022836 | <1e-4 | slr1862  | G0:0044422 | <1e-4 | slr0818  | G0:0016772 | 0.0167 |
| slr0816  | G0:0009141 | <1e-4 | slr0729  | G0:0009987 | <1e-4 | slr0784  | G0:0043167 | <1e-4 | slr10241 | G0:0044425 | <1e-4 | slr1674  | G0:0016874 | 0.0167 |
| slr0521  | G0:0048522 | <1e-4 | slr15047 | G0:0048523 | <1e-4 | slr0730  | G0:0015267 | <1e-4 | slr10354 | G0:0005575 | <1e-4 | slr1866  | G0:0016874 | 0.0167 |
| slr0217  | G0:0044003 | <1e-4 | slr17033 | G0:0031640 | <1e-4 | slr2118  | G0:0016746 | <1e-4 | slr10482 | G0:0005575 | <1e-4 | slr0287  | G0:0016874 | 0.0167 |
| slr7092  | G0:0006576 | <1e-4 | slr1152  | G0:0051716 | <1e-4 | ssr2998  | G0:0015405 | <1e-4 | slr0333  | G0:0044464 | <1e-4 | slr1023  | G0:0016874 | 0.0167 |
| slr1261  | G0:0006766 | <1e-4 | slr10191 | G0:0043436 | <1e-4 | slr10319 | G0:0022890 | <1e-4 | slr1339  | G0:0044464 | <1e-4 | slr1441  | G0:0016874 | 0.0167 |
| slr1611  | G0:0009308 | <1e-4 | slr0362  | G0:0051171 | <1e-4 | slr1932  | G0:0042623 | <1e-4 | slr11009 | G0:0044425 | <1e-4 | slr10547 | G0:0016874 | 0.0167 |
| slr1658  | G0:0051186 | <1e-4 | slr6028  | G0:0051716 | <1e-4 | ssl6061  | G0:0043492 | <1e-4 | ssr2843  | G0:0044444 | <1e-4 | slr0423  | G0:0016874 | 0.0167 |
| slr0217  | G0:0071841 | <1e-4 | slr2012  | G0:0042455 | <1e-4 | slr10910 | G0:0022892 | <1e-4 | slr0273  | G0:0043226 | <1e-4 | slr10913 | G0:0006807 | 0.0166 |
| slr0142  | G0:0031326 | <1e-4 | slr2118  | G0:0043549 | <1e-4 | slr0935  | G0:0043167 | <1e-4 | slr10864 | G0:0005575 | <1e-4 | slr1462  | G0:0006807 | 0.0166 |
| ssl15008 | G0:0006732 | <1e-4 | slr6067  | G0:0048519 | <1e-4 | slr1194  | G0:0022892 | <1e-4 | slr10645 | G0:0044424 | <1e-4 | slr17062 | G0:0006807 | 0.0166 |
| slr11832 | G0:0055114 | <1e-4 | slr11609 | G0:0001932 | <1e-4 | slr1263  | G0:0022832 | <1e-4 | slr11696 | G0:0044444 | <1e-4 | slr1657  | G0:0006807 | 0.0166 |
| slr1789  | G0:0042451 | <1e-4 | slr0264  | G0:0006733 | <1e-4 | slr17028 | G0:0015267 | <1e-4 | slr11315 | G0:0044444 | <1e-4 | slr10545 | G0:0006807 | 0.0166 |
| slr10858 | G0:0001932 | <1e-4 | slr10786 | G0:0019752 | <1e-4 | ssl15113 | G0:0016462 | <1e-4 | slr5087  | G0:0044424 | <1e-4 | slr15034 | G0:0006807 | 0.0166 |
| slr11528 | G0:0072528 | <1e-4 | slr10007 | G0:0006066 | <1e-4 | slr0924  | G0:0043167 | <1e-4 | slr10031 | G0:0044422 | <1e-4 | slr11359 | G0:0006807 | 0.0166 |
| slr6103  | G0:0018130 | <1e-4 | slr10888 | G0:0034654 | <1e-4 | slr0092  | G0:0015291 | <1e-4 | ssr6089  | G0:0044444 | <1e-4 | slr0333  | G0:0006807 | 0.0166 |
| slr0730  | G0:0046164 | <1e-4 | slr10225 | G0:0051716 | <1e-4 | slr6106  | G0:0043492 | <1e-4 | slr17067 | G0:0044444 | <1e-4 | ssl15099 | G0:0006807 | 0.0166 |
| slr1935  | G0:0008610 | <1e-4 | slr1210  | G0:0048518 | <1e-4 | slr1290  | G0:0015291 | <1e-4 | slr1846  | G0:0005575 | <1e-4 | slr15026 | G0:0006807 | 0.0166 |
| ssl12148 | G0:0022411 | <1e-4 | slr7026  | G0:0055082 | <1e-4 | slr10284 | G0:0005342 | <1e-4 | slr0698  | G0:0043226 | <1e-4 | ssl15007 | G0:0006807 | 0.0166 |

|         |            |       |         |            |       |         |            |       |         |            |       |         |            |        |
|---------|------------|-------|---------|------------|-------|---------|------------|-------|---------|------------|-------|---------|------------|--------|
| slr0848 | G0:0046394 | <1e-4 | s110497 | G0:0006066 | <1e-4 | s110861 | G0:0008171 | <1e-4 | slr5115 | G0:0044446 | <1e-4 | s111853 | G0:0006807 | 0.0166 |
| s111692 | G0:0019752 | <1e-4 | ss10739 | G0:0019637 | <1e-4 | slr0587 | G0:0022890 | <1e-4 | slr0487 | G0:0044446 | <1e-4 | s116054 | G0:0006807 | 0.0166 |
| ssr3189 | G0:0016053 | <1e-4 | s110294 | G0:0072527 | <1e-4 | s115062 | G0:0060089 | <1e-4 | ssr7084 | G0:0044422 | <1e-4 | slr5119 | G0:0006807 | 0.0166 |
| slr0935 | G0:0006066 | <1e-4 | s110932 | G0:0009126 | <1e-4 | slr0592 | G0:0003674 | <1e-4 | ss12420 | G0:0005575 | <1e-4 | ssr7036 | G0:0006807 | 0.0166 |
| slr0468 | G0:0052111 | <1e-4 | ssr6027 | G0:0016052 | <1e-4 | slr0650 | G0:0022803 | <1e-4 | ssr2781 | G0:0044464 | <1e-4 | slr0869 | G0:0006807 | 0.0166 |
| slr5037 | G0:0008150 | <1e-4 | s111024 | G0:0051171 | <1e-4 | s111446 | G0:0042623 | <1e-4 | s110168 | G0:0044425 | <1e-4 | ssr3409 | G0:0006807 | 0.0166 |
| slr0147 | G0:0065007 | <1e-4 | slr0655 | G0:0019637 | <1e-4 | ss13142 | G0:0043167 | <1e-4 | s111925 | G0:0044425 | <1e-4 | ss13383 | G0:0006807 | 0.0166 |
| slr1866 | G0:0080090 | <1e-4 | s110496 | G0:0006720 | <1e-4 | slr0023 | G0:0015267 | <1e-4 | slr1790 | G0:0044446 | <1e-4 | slr1863 | G0:0006807 | 0.0166 |
| ss12920 | G0:0031640 | <1e-4 | slr0637 | G0:0044260 | <1e-4 | slr6014 | G0:0015405 | <1e-4 | slr1999 | G0:0044424 | <1e-4 | slr1195 | G0:0006807 | 0.0166 |
| s110218 | G0:0046128 | <1e-4 | s115033 | G0:0046483 | <1e-4 | slr0742 | G0:0022838 | <1e-4 | s111912 | G0:0044425 | <1e-4 | slr1998 | G0:0006807 | 0.0166 |
| slr0517 | G0:0080090 | <1e-4 | s111552 | G0:0009144 | <1e-4 | slr1394 | G0:0003674 | <1e-4 | slr0780 | G0:0044425 | <1e-4 | s112015 | G0:0006807 | 0.0166 |
| slr1307 | G0:0043170 | <1e-4 | slr0890 | G0:0006220 | <1e-4 | ssr1951 | G0:0016817 | <1e-4 | s110760 | G0:0044446 | <1e-4 | slr1186 | G0:0006807 | 0.0166 |
| slr1338 | G0:0009199 | <1e-4 | slr5024 | G0:0009132 | <1e-4 | slr1816 | G0:0008171 | <1e-4 | ss10467 | G0:0044422 | <1e-4 | slr0505 | G0:0006807 | 0.0166 |
| slr0294 | G0:0016053 | <1e-4 | s110588 | G0:0006720 | <1e-4 | s111940 | G0:0043492 | <1e-4 | ss12148 | G0:0044464 | <1e-4 | slr6039 | G0:0006807 | 0.0166 |
| s110846 | G0:0009394 | <1e-4 | slr5101 | G0:0046483 | <1e-4 | slr1471 | G0:0016746 | <1e-4 | s111573 | G0:0044444 | <1e-4 | ss11004 | G0:0006807 | 0.0166 |
| s110031 | G0:0050794 | <1e-4 | slr1062 | G0:0051234 | <1e-4 | ss13615 | G0:0016818 | <1e-4 | slr0521 | G0:0044444 | <1e-4 | s110762 | G0:0006807 | 0.0166 |
| slr1638 | G0:0009394 | <1e-4 | slr0664 | G0:0043412 | <1e-4 | s111542 | G0:0003674 | <1e-4 | slr1935 | G0:0005575 | <1e-4 | slr1419 | G0:0006807 | 0.0166 |
| ss10483 | G0:0009991 | <1e-4 | s110268 | G0:0044260 | <1e-4 | slr0723 | G0:0008171 | <1e-4 | slr0398 | G0:0044422 | <1e-4 | s111691 | G0:0006807 | 0.0166 |
| slr1263 | G0:0022411 | <1e-4 | ssr6085 | G0:0044255 | <1e-4 | slr1266 | G0:0015405 | <1e-4 | slr5073 | G0:0044444 | <1e-4 | s111773 | G0:0006807 | 0.0166 |
| slr5116 | G0:0072527 | <1e-4 | slr1571 | G0:0044275 | <1e-4 | s117086 | G0:0022838 | <1e-4 | slr1241 | G0:0044422 | <1e-4 | slr6007 | G0:0006807 | 0.0166 |
| slr0702 | G0:0042455 | <1e-4 | slr1087 | G0:0044282 | <1e-4 | slr0876 | G0:0022803 | <1e-4 | slr1288 | G0:0044424 | <1e-4 | s115033 | G0:0006807 | 0.0166 |
| ss10312 | G0:0072527 | <1e-4 | slr7083 | G0:0046394 | <1e-4 | s110047 | G0:0022832 | <1e-4 | s111939 | G0:0044446 | <1e-4 | ssr0335 | G0:0006807 | 0.0166 |
| s110298 | G0:0009117 | <1e-4 | slr5119 | G0:0072524 | <1e-4 | slr1507 | G0:0016741 | <1e-4 | slr7073 | G0:0005575 | <1e-4 | slr2119 | G0:0006807 | 0.0166 |
| s110886 | G0:0009987 | <1e-4 | slr0787 | G0:0009057 | <1e-4 | s110176 | G0:0016818 | <1e-4 | s111359 | G0:0044422 | <1e-4 | slr7096 | G0:0006807 | 0.0166 |
| s111681 | G0:0051186 | <1e-4 | s111862 | G0:0009132 | <1e-4 | ssr1951 | G0:0016741 | <1e-4 | slr1278 | G0:0044424 | <1e-4 | ssr2912 | G0:0006807 | 0.0166 |
| s110414 | G0:0006163 | <1e-4 | slr0317 | G0:0016053 | <1e-4 | s111072 | G0:0015293 | <1e-4 | slr6050 | G0:0043226 | <1e-4 | slr7101 | G0:0006807 | 0.0166 |
| s111131 | G0:0005996 | <1e-4 | s110749 | G0:0072521 | <1e-4 | s110980 | G0:0060089 | <1e-4 | slr0725 | G0:0044446 | <1e-4 | slr5116 | G0:0006807 | 0.0166 |
| s110008 | G0:0051186 | <1e-4 | slr0196 | G0:0006811 | <1e-4 | slr1032 | G0:0003674 | <1e-4 | s110822 | G0:0044425 | <1e-4 | s111400 | G0:0006807 | 0.0166 |
| slr1178 | G0:0019362 | <1e-4 | s110381 | G0:0048878 | <1e-4 | slr7016 | G0:0042623 | <1e-4 | s110625 | G0:0044446 | <1e-4 | ss11498 | G0:0006807 | 0.0166 |
| ss10832 | G0:0055086 | <1e-4 | slr0184 | G0:0090304 | <1e-4 | slr2144 | G0:0022890 | <1e-4 | s110595 | G0:0005575 | <1e-4 | slr1468 | G0:0006807 | 0.0166 |
| s111486 | G0:0045184 | <1e-4 | s111401 | G0:0055114 | <1e-4 | s111691 | G0:0003674 | <1e-4 | slr0106 | G0:0044446 | <1e-4 | slr7083 | G0:0006807 | 0.0166 |
| ss17039 | G0:0006066 | <1e-4 | s111583 | G0:0006766 | <1e-4 | s111188 | G0:0022892 | <1e-4 | s110446 | G0:0044425 | <1e-4 | s110775 | G0:0006807 | 0.0166 |
| s110775 | G0:0008150 | <1e-4 | slr0731 | G0:0048518 | <1e-4 | s111131 | G0:0015075 | <1e-4 | ssr1499 | G0:0044422 | <1e-4 | s110886 | G0:0006807 | 0.0166 |
| s110532 | G0:0050794 | <1e-4 | slr6029 | G0:0050789 | <1e-4 | slr1194 | G0:0022838 | <1e-4 | s111512 | G0:0044464 | <1e-4 | s111447 | G0:0006807 | 0.0166 |
| slr1537 | G0:0019751 | <1e-4 | slr2060 | G0:0009260 | <1e-4 | slr1577 | G0:0022891 | <1e-4 | ssr7035 | G0:0044422 | <1e-4 | s110181 | G0:0006807 | 0.0166 |
| slr7013 | G0:0006066 | <1e-4 | slr0569 | G0:0031323 | <1e-4 | slr5127 | G0:0008171 | <1e-4 | s110310 | G0:0044446 | <1e-4 | slr6067 | G0:0006807 | 0.0166 |
| s118012 | G0:0009059 | <1e-4 | slr1547 | G0:0019362 | <1e-4 | s111293 | G0:0016746 | <1e-4 | s110274 | G0:0044422 | <1e-4 | s111062 | G0:0006807 | 0.0166 |
| slr1413 | G0:0009142 | <1e-4 | slr0941 | G0:0043648 | <1e-4 | slr1218 | G0:0015075 | <1e-4 | slr0398 | G0:0043226 | <1e-4 | s111722 | G0:0006807 | 0.0166 |
| slr0304 | G0:0048518 | <1e-4 | s115090 | G0:0046164 | <1e-4 | slr0923 | G0:0008171 | <1e-4 | slr2119 | G0:0044444 | <1e-4 | s110658 | G0:0006807 | 0.0166 |
| s111891 | G0:0044106 | <1e-4 | s110406 | G0:0019219 | <1e-4 | ss18039 | G0:0016462 | <1e-4 | slr1677 | G0:0044424 | <1e-4 | ssr1407 | G0:0006807 | 0.0166 |
| ssr7035 | G0:0051716 | <1e-4 | slr0455 | G0:0044271 | <1e-4 | s115062 | G0:0016462 | <1e-4 | ss11300 | G0:0044464 | <1e-4 | slr7080 | G0:0006807 | 0.0166 |
| s111401 | G0:0072521 | <1e-4 | slr2000 | G0:0016054 | <1e-4 | slr0980 | G0:0016746 | <1e-4 | s111163 | G0:0044464 | <1e-4 | s111509 | G0:0006807 | 0.0166 |
| slr1951 | G0:0009394 | <1e-4 | slr0458 | G0:0034641 | <1e-4 | slr1623 | G0:0015293 | <1e-4 | slr1173 | G0:0044464 | <1e-4 | ss12717 | G0:0006807 | 0.0166 |
| s111036 | G0:0044275 | <1e-4 | s110354 | G0:0009394 | <1e-4 | slr1612 | G0:0008171 | <1e-4 | s111072 | G0:0044424 | <1e-4 | s110815 | G0:0006807 | 0.0166 |
| s110930 | G0:0008610 | <1e-4 | s110760 | G0:0009124 | <1e-4 | ss17051 | G0:0008171 | <1e-4 | slr2060 | G0:0044424 | <1e-4 | ssr3189 | G0:0006807 | 0.0166 |
| slr0092 | G0:0022411 | <1e-4 | ssr1528 | G0:0016054 | <1e-4 | s111764 | G0:0022891 | <1e-4 | ss18008 | G0:0043226 | <1e-4 | slr1566 | G0:0006807 | 0.0166 |
| ssr6099 | G0:0005996 | <1e-4 | ss12162 | G0:0009394 | <1e-4 | s110424 | G0:0022890 | <1e-4 | ss13177 | G0:0044424 | <1e-4 | slr0407 | G0:0006807 | 0.0166 |
| s110007 | G0:0046164 | <1e-4 | ssr2615 | G0:0072528 | <1e-4 | ss11004 | G0:0022892 | <1e-4 | slr7025 | G0:0044444 | <1e-4 | ssr2554 | G0:0006807 | 0.0166 |
| slr1263 | G0:0048518 | <1e-4 | s110863 | G0:0009987 | <1e-4 | slr0082 | G0:0060089 | <1e-4 | slr0082 | G0:0044444 | <1e-4 | slr7082 | G0:0006807 | 0.0166 |
| s110609 | G0:0046483 | <1e-4 | slr0264 | G0:0050801 | <1e-4 | s111692 | G0:0015077 | <1e-4 | slr1207 | G0:0005575 | <1e-4 | slr7095 | G0:0006807 | 0.0166 |
| slr0053 | G0:0009117 | <1e-4 | s111477 | G0:0044106 | <1e-4 | slr0300 | G0:0016817 | <1e-4 | ssr2787 | G0:0044425 | <1e-4 | slr6047 | G0:0006807 | 0.0166 |
| slr5023 | G0:0044248 | <1e-4 | s110939 | G0:0009161 | <1e-4 | ssr6027 | G0:0015075 | <1e-4 | s110180 | G0:0044425 | <1e-4 | slr1306 | G0:0006807 | 0.0166 |
| ss13829 | G0:0010556 | <1e-4 | slr0404 | G0:0006066 | <1e-4 | s110563 | G0:0016746 | <1e-4 | s111547 | G0:0044444 | <1e-4 | s110487 | G0:0006807 | 0.0166 |
| s111188 | G0:0006082 | <1e-4 | slr6063 | G0:0009165 | <1e-4 | s111426 | G0:0016817 | <1e-4 | ss11792 | G0:0005575 | <1e-4 | s110284 | G0:0006807 | 0.0166 |

|         |            |       |         |            |       |         |            |       |         |            |       |         |            |        |
|---------|------------|-------|---------|------------|-------|---------|------------|-------|---------|------------|-------|---------|------------|--------|
| s110274 | G0:0065007 | <1e-4 | s110803 | G0:0043648 | <1e-4 | s110376 | G0:0015077 | <1e-4 | s110066 | G0:0044424 | <1e-4 | s1r6073 | G0:0006807 | 0.0166 |
| s110269 | G0:0051716 | <1e-4 | s1r2048 | G0:0006811 | <1e-4 | ssr2317 | G0:0015405 | <1e-4 | s110098 | G0:0044464 | <1e-4 | s110478 | G0:0006807 | 0.0166 |
| s111054 | G0:0031640 | <1e-4 | s1r6087 | G0:0008150 | <1e-4 | s1r0765 | G0:0022838 | <1e-4 | s1r1752 | G0:0044424 | <1e-4 | s1r6013 | G0:0006807 | 0.0166 |
| s1r0179 | G0:0006793 | <1e-4 | s1r1619 | G0:0009893 | <1e-4 | s111640 | G0:0016817 | <1e-4 | s110314 | G0:0044422 | <1e-4 | ss12781 | G0:0006807 | 0.0166 |
| s111773 | G0:0009056 | <1e-4 | s1r1069 | G0:0055086 | <1e-4 | s111006 | G0:0042623 | <1e-4 | s1r1718 | G0:0044422 | <1e-4 | ss18005 | G0:0006807 | 0.0166 |
| s111691 | G0:0008610 | <1e-4 | s111321 | G0:0006066 | <1e-4 | s111726 | G0:0022838 | <1e-4 | s111072 | G0:0044464 | <1e-4 | ss12471 | G0:0006807 | 0.0166 |
| s110243 | G0:0072522 | <1e-4 | s1r6007 | G0:0044271 | <1e-4 | s1r1911 | G0:0008171 | <1e-4 | s1r1303 | G0:0044444 | <1e-4 | s1r1429 | G0:0006807 | 0.0166 |
| s1r1493 | G0:0009123 | <1e-4 | s110982 | G0:0051818 | <1e-4 | s1r1768 | G0:0015077 | <1e-4 | s110149 | G0:0005575 | <1e-4 | s118007 | G0:0006807 | 0.0166 |
| s110335 | G0:0060255 | <1e-4 | ssr1391 | G0:0043170 | <1e-4 | s1r0112 | G0:0015399 | <1e-4 | s1r1944 | G0:0043226 | <1e-4 | s1r1815 | G0:0006807 | 0.0166 |
| ss11972 | G0:0010468 | <1e-4 | s1r2004 | G0:0046164 | <1e-4 | s110007 | G0:0008171 | <1e-4 | s111504 | G0:0044424 | <1e-4 | s110168 | G0:0006259 | 0.0161 |
| ssr2554 | G0:0009987 | <1e-4 | s111071 | G0:0009142 | <1e-4 | s110010 | G0:0015293 | <1e-4 | s1r6074 | G0:0044464 | <1e-4 | s110282 | G0:0006259 | 0.0161 |
| s1r1163 | G0:0055082 | <1e-4 | s110994 | G0:0050801 | <1e-4 | s1r6008 | G0:0015075 | <1e-4 | s111464 | G0:0044424 | <1e-4 | s1r1677 | G0:0006259 | 0.0161 |
| ssr1951 | G0:0006091 | <1e-4 | s110069 | G0:0009056 | <1e-4 | s110737 | G0:0016817 | <1e-4 | s1r0398 | G0:0044446 | <1e-4 | s111485 | G0:0006259 | 0.0161 |
| s1r0272 | G0:0042451 | <1e-4 | s110611 | G0:0009123 | <1e-4 | s111025 | G0:0016818 | <1e-4 | s111834 | G0:0044425 | <1e-4 | s110167 | G0:0006259 | 0.0161 |
| s110931 | G0:0009893 | <1e-4 | s111891 | G0:0043648 | <1e-4 | s1r1110 | G0:0022832 | <1e-4 | s111378 | G0:0044464 | <1e-4 | s1r0262 | G0:0006259 | 0.0161 |
| s1r0960 | G0:0065007 | <1e-4 | s111022 | G0:0034641 | <1e-4 | s1r1218 | G0:0043167 | <1e-4 | s115032 | G0:0044422 | <1e-4 | s1r1187 | G0:0006259 | 0.0161 |
| ssr3300 | G0:0072527 | <1e-4 | s1r1623 | G0:0033013 | <1e-4 | s1r0333 | G0:0022803 | <1e-4 | s1r1275 | G0:0044425 | <1e-4 | s1r0038 | G0:0006259 | 0.0161 |
| ssr1041 | G0:0048519 | <1e-4 | s110611 | G0:0042451 | <1e-4 | ss12009 | G0:0008171 | <1e-4 | s1r1263 | G0:0044446 | <1e-4 | s1r1815 | G0:0006259 | 0.0161 |
| s1r0516 | G0:0034654 | <1e-4 | s110843 | G0:0046128 | <1e-4 | s110793 | G0:0015077 | <1e-4 | s110174 | G0:0044444 | <1e-4 | s1r1468 | G0:0006259 | 0.0161 |
| s111191 | G0:0009991 | <1e-4 | s111307 | G0:0019362 | <1e-4 | s111783 | G0:0008171 | <1e-4 | s1r0598 | G0:0044425 | <1e-4 | s110397 | G0:0006259 | 0.0161 |
| s110238 | G0:0072521 | <1e-4 | ss13379 | G0:0055086 | <1e-4 | s111285 | G0:0022803 | <1e-4 | s111797 | G0:0044464 | <1e-4 | s1r2032 | G0:0006259 | 0.0161 |
| s1r1103 | G0:0080090 | <1e-4 | s1r2117 | G0:0071840 | <1e-4 | ssr6046 | G0:0008171 | <1e-4 | s1r1811 | G0:0044425 | <1e-4 | s1r5018 | G0:0006259 | 0.0161 |
| ss12920 | G0:0008150 | <1e-4 | s111671 | G0:0055114 | <1e-4 | s1r1449 | G0:0022838 | <1e-4 | s1r0393 | G0:0005575 | <1e-4 | s111155 | G0:0006259 | 0.0161 |
| s111752 | G0:0065007 | <1e-4 | s1r1306 | G0:0006220 | <1e-4 | s111095 | G0:0005342 | <1e-4 | s110022 | G0:0044424 | <1e-4 | s1r2119 | G0:0006259 | 0.0161 |
| s111583 | G0:0065007 | <1e-4 | s1r6029 | G0:0009263 | <1e-4 | ss10739 | G0:0016818 | <1e-4 | s1r1278 | G0:0044444 | <1e-4 | ssr0102 | G0:0006259 | 0.0161 |
| ssr6086 | G0:0043436 | <1e-4 | s111166 | G0:0009142 | <1e-4 | s1r0455 | G0:0060089 | <1e-4 | s1r0664 | G0:0005575 | <1e-4 | s1r1273 | G0:0006259 | 0.0161 |
| s110266 | G0:0050801 | <1e-4 | s110802 | G0:0043549 | <1e-4 | s1r2052 | G0:0016817 | <1e-4 | s110762 | G0:0005575 | <1e-4 | s1r1958 | G0:0006259 | 0.0161 |
| s110815 | G0:0043170 | <1e-4 | s118032 | G0:0051246 | <1e-4 | s1r0876 | G0:0005342 | <1e-4 | s1r1263 | G0:0044424 | <1e-4 | s1r2101 | G0:0006259 | 0.0161 |
| s1r6044 | G0:0009142 | <1e-4 | s1r1413 | G0:0051234 | <1e-4 | ssr1768 | G0:0022891 | <1e-4 | s116055 | G0:0044464 | <1e-4 | s1r1914 | G0:0006259 | 0.0161 |
| ss10788 | G0:0044003 | <1e-4 | s110394 | G0:0022607 | <1e-4 | s1r1398 | G0:0015291 | <1e-4 | s111251 | G0:0044424 | <1e-4 | s110853 | G0:0006259 | 0.0161 |
| s110658 | G0:0006721 | <1e-4 | s1r6008 | G0:0019752 | <1e-4 | ss10294 | G0:0015399 | <1e-4 | sm10011 | G0:0005575 | <1e-4 | s1r1768 | G0:0006259 | 0.0161 |
| s1r0053 | G0:0050896 | <1e-4 | s1r1851 | G0:0045184 | <1e-4 | s1r1471 | G0:0016741 | <1e-4 | s111380 | G0:0044444 | <1e-4 | s110284 | G0:0006259 | 0.0161 |
| s1r5053 | G0:0009057 | <1e-4 | s1r1425 | G0:0055086 | <1e-4 | s110069 | G0:0005342 | <1e-4 | ss15113 | G0:0044464 | <1e-4 | s1r0151 | G0:0006259 | 0.0161 |
| ss12065 | G0:0044283 | <1e-4 | s111764 | G0:0006721 | <1e-4 | ssr3154 | G0:0016818 | <1e-4 | s1r0553 | G0:0044464 | <1e-4 | s1r1660 | G0:0006259 | 0.0161 |
| s111763 | G0:0019362 | <1e-4 | s1r1920 | G0:0009056 | <1e-4 | s1r0360 | G0:0016817 | <1e-4 | s1r2119 | G0:0043226 | <1e-4 | s115006 | G0:0006259 | 0.0161 |
| s1r0053 | G0:0019637 | <1e-4 | s110558 | G0:0052188 | <1e-4 | s111609 | G0:0016818 | <1e-4 | s111186 | G0:0044464 | <1e-4 | s1r6006 | G0:0006259 | 0.0161 |
| ss10788 | G0:0042455 | <1e-4 | s111009 | G0:0042455 | <1e-4 | s1r1116 | G0:0016741 | <1e-4 | s110181 | G0:0005575 | <1e-4 | s1r6080 | G0:0006259 | 0.0161 |
| s110678 | G0:0051171 | <1e-4 | s1r0699 | G0:0090304 | <1e-4 | s1r0670 | G0:0016741 | <1e-4 | s1r1306 | G0:0005575 | <1e-4 | s110545 | G0:0006259 | 0.0161 |
| s110428 | G0:0009150 | <1e-4 | s1r0318 | G0:0019222 | <1e-4 | ssr0109 | G0:0060089 | <1e-4 | s1r7082 | G0:0044422 | <1e-4 | s1r1568 | G0:0006259 | 0.0161 |
| s1r0334 | G0:0009161 | <1e-4 | s110101 | G0:0006631 | <1e-4 | s111068 | G0:0003674 | <1e-4 | s1r0869 | G0:0044424 | <1e-4 | sg10001 | G0:0006259 | 0.0161 |
| s110886 | G0:0046483 | <1e-4 | s1r1116 | G0:0046128 | <1e-4 | s110225 | G0:0022890 | <1e-4 | s1r6013 | G0:0044446 | <1e-4 | s1r2010 | G0:0006259 | 0.0161 |
| s110911 | G0:0051246 | <1e-4 | ss10739 | G0:0009142 | <1e-4 | s110272 | G0:0022892 | <1e-4 | s118001 | G0:0044446 | <1e-4 | s1r0569 | G0:0006259 | 0.0161 |
| s110547 | G0:0009309 | <1e-4 | s117078 | G0:0050794 | <1e-4 | s111954 | G0:0015293 | <1e-4 | s1r6012 | G0:0005575 | <1e-4 | s110611 | G0:0006259 | 0.0161 |
| s1r6012 | G0:0006066 | <1e-4 | s110198 | G0:0043436 | <1e-4 | s1r1307 | G0:0015267 | <1e-4 | s1r1261 | G0:0005575 | <1e-4 | s1r7081 | G0:0006259 | 0.0161 |
| ssr1256 | G0:0009144 | <1e-4 | s1r1128 | G0:0043170 | <1e-4 | s117050 | G0:0016746 | <1e-4 | s110779 | G0:0044444 | <1e-4 | ssr1766 | G0:0006259 | 0.0161 |
| ss17074 | G0:0006811 | <1e-4 | s1r0755 | G0:0051234 | <1e-4 | s1r0912 | G0:0060089 | <1e-4 | s111571 | G0:0044425 | <1e-4 | s1r1097 | G0:0006259 | 0.0161 |
| s1r7083 | G0:0043412 | <1e-4 | s111446 | G0:0072527 | <1e-4 | s110785 | G0:0022857 | <1e-4 | s1r1258 | G0:0044425 | <1e-4 | s1r0552 | G0:0006259 | 0.0161 |
| s1r1071 | G0:0046907 | <1e-4 | s111834 | G0:0009987 | <1e-4 | s1r2103 | G0:0043167 | <1e-4 | s1r1668 | G0:0005575 | <1e-4 | s111884 | G0:0006259 | 0.0161 |
| s1r1391 | G0:0009057 | <1e-4 | s1r6066 | G0:0009892 | <1e-4 | ssr6078 | G0:0022857 | <1e-4 | s1r0334 | G0:0044446 | <1e-4 | s1r7101 | G0:0006259 | 0.0161 |
| s1r0376 | G0:0019222 | <1e-4 | s110732 | G0:0016054 | <1e-4 | s1r7098 | G0:0015293 | <1e-4 | s1r1095 | G0:0005575 | <1e-4 | s1r0092 | G0:0006259 | 0.0161 |
| s1r7097 | G0:0016052 | <1e-4 | s1r0238 | G0:0031323 | <1e-4 | ssr3341 | G0:0043492 | <1e-4 | s1r2052 | G0:0005575 | <1e-4 | s1r6063 | G0:0006259 | 0.0161 |
| s1r5012 | G0:0006721 | <1e-4 | s111319 | G0:0055082 | <1e-4 | ssr0657 | G0:0043167 | <1e-4 | s111106 | G0:0005575 | <1e-4 | s1r6005 | G0:0006259 | 0.0161 |
| s1r1178 | G0:0009144 | <1e-4 | s1r2101 | G0:0051716 | <1e-4 | s110762 | G0:0043492 | <1e-4 | s1r1495 | G0:0044446 | <1e-4 | s1r1183 | G0:0006259 | 0.0161 |
| s1r0392 | G0:0008610 | <1e-4 | s111060 | G0:0042455 | <1e-4 | s1r1083 | G0:0016741 | <1e-4 | s1r1444 | G0:0044425 | <1e-4 | s118004 | G0:0006259 | 0.0161 |

|         |            |       |         |            |       |         |            |       |         |            |       |         |            |        |
|---------|------------|-------|---------|------------|-------|---------|------------|-------|---------|------------|-------|---------|------------|--------|
| sl10762 | G0:0005996 | <1e-4 | slr0300 | G0:0009308 | <1e-4 | sl11319 | G0:0016741 | <1e-4 | slr1927 | G0:0044425 | <1e-4 | slr6072 | G0:0006259 | 0.0161 |
| sl15034 | G0:0072524 | <1e-4 | ssr1114 | G0:0022411 | <1e-4 | ss17039 | G0:0060089 | <1e-4 | sl10696 | G0:0044425 | <1e-4 | ssr2912 | G0:0006259 | 0.0161 |
| sl17030 | G0:0071496 | <1e-4 | slr1170 | G0:0080090 | <1e-4 | ss11417 | G0:0005342 | <1e-4 | sl11570 | G0:0005575 | <1e-4 | slr0264 | G0:0006259 | 0.0161 |
| slr1468 | G0:0060255 | <1e-4 | ss10109 | G0:0051234 | <1e-4 | slr2025 | G0:0008171 | <1e-4 | sl10513 | G0:0044446 | <1e-4 | sl18033 | G0:0006259 | 0.0161 |
| sl11660 | G0:0034654 | <1e-4 | sl10298 | G0:0009165 | <1e-4 | sl10294 | G0:0008171 | <1e-4 | sl10293 | G0:0044424 | <1e-4 | ss15129 | G0:0006259 | 0.0161 |
| sl10678 | G0:0051179 | <1e-4 | ss12595 | G0:0016054 | <1e-4 | sl15026 | G0:0022890 | <1e-4 | slr0554 | G0:0044444 | <1e-4 | slr0971 | G0:0006259 | 0.0161 |
| sl10444 | G0:0031323 | <1e-4 | slr1926 | G0:0009117 | <1e-4 | slr0602 | G0:0022838 | <1e-4 | sl10854 | G0:0044425 | <1e-4 | slr1263 | G0:0006259 | 0.0161 |
| slr1753 | G0:0008610 | <1e-4 | sl10669 | G0:0043170 | <1e-4 | sl10839 | G0:0008171 | <1e-4 | slr0386 | G0:0044424 | <1e-4 | ssr2787 | G0:0006259 | 0.0159 |
| slr1188 | G0:0006082 | <1e-4 | slr1923 | G0:0006163 | <1e-4 | sl10752 | G0:0016817 | <1e-4 | sl10930 | G0:0005575 | <1e-4 | sl10524 | G0:0006259 | 0.0159 |
| ssr3129 | G0:0034660 | <1e-4 | sl10625 | G0:0051347 | <1e-4 | slr8021 | G0:0022891 | <1e-4 | ss10352 | G0:0043226 | <1e-4 | slr1885 | G0:0006259 | 0.0159 |
| slr1573 | G0:0006220 | <1e-4 | sl10447 | G0:0006082 | <1e-4 | slr7095 | G0:0022891 | <1e-4 | slr1964 | G0:0043226 | <1e-4 | sl10066 | G0:0006259 | 0.0159 |
| ssr1768 | G0:0010556 | <1e-4 | sl11130 | G0:0090304 | <1e-4 | sl11135 | G0:0016818 | <1e-4 | slr0885 | G0:0043226 | <1e-4 | ss12807 | G0:0006259 | 0.0159 |
| slr1122 | G0:0006576 | <1e-4 | sl11163 | G0:0009142 | <1e-4 | slr1644 | G0:0022803 | <1e-4 | slr2046 | G0:0005575 | <1e-4 | ssr1765 | G0:0006259 | 0.0159 |
| sl17089 | G0:0019219 | <1e-4 | sl17030 | G0:0008150 | <1e-4 | sl10419 | G0:0042623 | <1e-4 | sl11062 | G0:0044444 | <1e-4 | slr1999 | G0:0006259 | 0.0159 |
| sl11696 | G0:0006082 | <1e-4 | slr7100 | G0:0048518 | <1e-4 | sl10803 | G0:0016746 | <1e-4 | sl10167 | G0:0044464 | <1e-4 | slr0941 | G0:0006259 | 0.0159 |
| sl10930 | G0:0010468 | <1e-4 | ss18039 | G0:0072524 | <1e-4 | slr0498 | G0:0022892 | <1e-4 | slr1568 | G0:0005575 | <1e-4 | ssr2962 | G0:0006259 | 0.0159 |
| slr6091 | G0:0006793 | <1e-4 | sl11583 | G0:0048519 | <1e-4 | slr0076 | G0:0015291 | <1e-4 | slr0049 | G0:0044446 | <1e-4 | slr0921 | G0:0006259 | 0.0159 |
| slr1628 | G0:0006082 | <1e-4 | sl10414 | G0:0044003 | <1e-4 | slr1163 | G0:0005342 | <1e-4 | sl10183 | G0:0005575 | <1e-4 | slr1571 | G0:0006259 | 0.0159 |
| sl11509 | G0:0051716 | <1e-4 | ss10312 | G0:0006733 | <1e-4 | slr1628 | G0:0022838 | <1e-4 | sl10867 | G0:0044424 | <1e-4 | slr0294 | G0:0006259 | 0.0159 |
| ss12807 | G0:0046164 | <1e-4 | slr1287 | G0:0006733 | <1e-4 | sl10096 | G0:0043167 | <1e-4 | ss13829 | G0:0044422 | <1e-4 | slr0386 | G0:0006259 | 0.0159 |
| slr0606 | G0:0048519 | <1e-4 | slr0151 | G0:0048522 | <1e-4 | sl11373 | G0:0022857 | <1e-4 | slr0625 | G0:0043226 | <1e-4 | slr2011 | G0:0006259 | 0.0159 |
| ssr7072 | G0:0006720 | <1e-4 | ssr3189 | G0:0009117 | <1e-4 | sl11061 | G0:0022892 | <1e-4 | sl10676 | G0:0044464 | <1e-4 | sl11949 | G0:0006807 | 0.0155 |
| sl11307 | G0:0051716 | <1e-4 | slr0695 | G0:0034654 | <1e-4 | sl11163 | G0:0042623 | <1e-4 | sl10413 | G0:0044446 | <1e-4 | sl10007 | G0:0006807 | 0.0155 |
| slr1187 | G0:0090304 | <1e-4 | slr0981 | G0:0006721 | <1e-4 | slr0287 | G0:0022892 | <1e-4 | sl11109 | G0:0044446 | <1e-4 | slr0845 | G0:0006807 | 0.0155 |
| slr1407 | G0:0044255 | <1e-4 | sl17087 | G0:0044275 | <1e-4 | ssr7072 | G0:0022857 | <1e-4 | slr1846 | G0:0044444 | <1e-4 | sl10280 | G0:0006807 | 0.0155 |
| sl10775 | G0:0044283 | <1e-4 | ss17022 | G0:0044275 | <1e-4 | slr1262 | G0:0003674 | <1e-4 | sl11765 | G0:0044425 | <1e-4 | ss10242 | G0:0006807 | 0.0155 |
| sl17062 | G0:0048522 | <1e-4 | slr0845 | G0:0019637 | <1e-4 | ss11300 | G0:0022803 | <1e-4 | ssr2611 | G0:0044444 | <1e-4 | slr2144 | G0:0006807 | 0.0155 |
| sl11911 | G0:0019752 | <1e-4 | sl11485 | G0:0016052 | <1e-4 | sl11381 | G0:0060089 | <1e-4 | slr1690 | G0:0044464 | <1e-4 | slr1230 | G0:0006807 | 0.0155 |
| slr1365 | G0:0051716 | <1e-4 | slr1768 | G0:0009889 | <1e-4 | slr0967 | G0:0005342 | <1e-4 | slr1623 | G0:0005575 | <1e-4 | sl11675 | G0:0006807 | 0.0155 |
| slr7059 | G0:0016052 | <1e-4 | slr1644 | G0:0006793 | <1e-4 | slr0479 | G0:0015399 | <1e-4 | slr2105 | G0:0005575 | <1e-4 | slr0404 | G0:0006807 | 0.0155 |
| ssr1558 | G0:0051171 | <1e-4 | slr1218 | G0:0009259 | <1e-4 | sl11006 | G0:0016818 | <1e-4 | sl11656 | G0:0044464 | <1e-4 | slr1638 | G0:0006807 | 0.0155 |
| slr0740 | G0:0043933 | <1e-4 | slr0755 | G0:0009892 | <1e-4 | ss10353 | G0:0022836 | <1e-4 | sl10802 | G0:0005575 | <1e-4 | sl11830 | G0:0006807 | 0.0155 |
| sl11447 | G0:0019219 | <1e-4 | slr0869 | G0:0009889 | <1e-4 | sl11912 | G0:0003674 | <1e-4 | sl11321 | G0:0044444 | <1e-4 | slr0431 | G0:0006807 | 0.0155 |
| slr2027 | G0:0048518 | <1e-4 | sl11072 | G0:0090304 | <1e-4 | slr0740 | G0:0015399 | <1e-4 | ss12245 | G0:0005575 | <1e-4 | sl10676 | G0:0006807 | 0.0155 |
| slr0975 | G0:0046164 | <1e-4 | slr0408 | G0:0044282 | <1e-4 | sl11355 | G0:0016462 | <1e-4 | sl10930 | G0:0044446 | <1e-4 | slr1573 | G0:0006807 | 0.0155 |
| sl11446 | G0:0009263 | <1e-4 | slr0609 | G0:0048518 | <1e-4 | slr7026 | G0:0042623 | <1e-4 | sl11954 | G0:0044425 | <1e-4 | ssr2787 | G0:0006807 | 0.0155 |
| sl12006 | G0:0006163 | <1e-4 | ss15095 | G0:0043933 | <1e-4 | slr1572 | G0:0015293 | <1e-4 | sl10925 | G0:0044446 | <1e-4 | sl10532 | G0:0006807 | 0.0155 |
| sl11765 | G0:0065007 | <1e-4 | slr1647 | G0:0044283 | <1e-4 | slr2073 | G0:0015291 | <1e-4 | sl16053 | G0:0044425 | <1e-4 | slr0360 | G0:0006807 | 0.0155 |
| sl15033 | G0:0051234 | <1e-4 | slr0730 | G0:0072524 | <1e-4 | slr1614 | G0:0022838 | <1e-4 | sl11606 | G0:0043226 | <1e-4 | slr0144 | G0:0006807 | 0.0155 |
| sl11072 | G0:0044248 | <1e-4 | slr1737 | G0:0009117 | <1e-4 | ssr5092 | G0:0022832 | <1e-4 | slr2122 | G0:0043226 | <1e-4 | slr0872 | G0:0006807 | 0.0155 |
| sl10101 | G0:0006163 | <1e-4 | sl15128 | G0:0051179 | <1e-4 | sl10930 | G0:0022892 | <1e-4 | sl11233 | G0:0005575 | <1e-4 | slr1913 | G0:0006807 | 0.0155 |
| ssr2553 | G0:0006793 | <1e-4 | slr0845 | G0:0065007 | <1e-4 | slr0459 | G0:0016817 | <1e-4 | ss10788 | G0:0005575 | <1e-4 | sl10804 | G0:0044237 | 0.015  |
| slr6021 | G0:0044282 | <1e-4 | sl10793 | G0:0051171 | <1e-4 | slr6021 | G0:0015399 | <1e-4 | slr0325 | G0:0044425 | <1e-4 | slr0491 | G0:0044237 | 0.015  |
| ssr1698 | G0:0006091 | <1e-4 | sl11433 | G0:0006766 | <1e-4 | sl11736 | G0:0016741 | <1e-4 | slr1468 | G0:0044464 | <1e-4 | sl10272 | G0:0004518 | 0.015  |
| slr0699 | G0:0052188 | <1e-4 | ssr3467 | G0:0046164 | <1e-4 | slr1957 | G0:0022890 | <1e-4 | slr0404 | G0:0044444 | <1e-4 | sl11119 | G0:0004518 | 0.015  |
| ssr3467 | G0:0019219 | <1e-4 | sl10586 | G0:0065007 | <1e-4 | ssr6089 | G0:0015291 | <1e-4 | slr1266 | G0:0044444 | <1e-4 | slr2018 | G0:0004518 | 0.015  |
| slr7081 | G0:0022411 | <1e-4 | slr1397 | G0:0009991 | <1e-4 | sl11350 | G0:0022832 | <1e-4 | slr0813 | G0:0044424 | <1e-4 | slr1032 | G0:0004518 | 0.015  |
| slr1774 | G0:0071841 | <1e-4 | sl11570 | G0:0008610 | <1e-4 | ssr2611 | G0:0015267 | <1e-4 | sl11233 | G0:0044444 | <1e-4 | ssr1258 | G0:0004518 | 0.015  |
| slr0442 | G0:0046907 | <1e-4 | ssr1155 | G0:0022411 | <1e-4 | slr0625 | G0:0016741 | <1e-4 | ssr1375 | G0:0044446 | <1e-4 | slr0408 | G0:0004518 | 0.015  |
| slr1444 | G0:0009123 | <1e-4 | sl10423 | G0:0009150 | <1e-4 | ssr0692 | G0:0060089 | <1e-4 | slr0269 | G0:0044422 | <1e-4 | sl10606 | G0:0004518 | 0.015  |
| sl10563 | G0:0051171 | <1e-4 | slr5116 | G0:0009165 | <1e-4 | slr1235 | G0:0042623 | <1e-4 | slr1103 | G0:0044444 | <1e-4 | ssr2803 | G0:0004518 | 0.015  |
| sl11611 | G0:0009893 | <1e-4 | slr1215 | G0:0043933 | <1e-4 | sl11304 | G0:0022803 | <1e-4 | slr0871 | G0:0044464 | <1e-4 | sl11912 | G0:0004518 | 0.015  |
| ssr6020 | G0:0009144 | <1e-4 | slr1847 | G0:0009892 | <1e-4 | slr0362 | G0:0015293 | <1e-4 | slr1800 | G0:0044422 | <1e-4 | sl10071 | G0:0004518 | 0.015  |
| sl11307 | G0:0009260 | <1e-4 | slr0263 | G0:0051246 | <1e-4 | slr1101 | G0:0015077 | <1e-4 | sl11570 | G0:0044422 | <1e-4 | slr0937 | G0:0006807 | 0.0149 |



|         |            |       |          |            |       |         |            |       |         |            |       |         |            |        |
|---------|------------|-------|----------|------------|-------|---------|------------|-------|---------|------------|-------|---------|------------|--------|
| slr0521 | G0:0009144 | <1e-4 | ssr0657  | G0:0009150 | <1e-4 | slr0731 | G0:0016746 | <1e-4 | slr1846 | G0:0044424 | <1e-4 | ssr0536 | G0:0006807 | 0.0149 |
| slr1163 | G0:0060255 | <1e-4 | ssl2245  | G0:0044260 | <1e-4 | slr1958 | G0:0015267 | <1e-4 | slr0151 | G0:0005575 | <1e-4 | slr0871 | G0:0006807 | 0.0149 |
| slr0712 | G0:0031640 | <1e-4 | slr0006  | G0:0001932 | <1e-4 | slr1122 | G0:0015267 | <1e-4 | sl10010 | G0:0044422 | <1e-4 | sl11218 | G0:0006807 | 0.0149 |
| slr1069 | G0:0019219 | <1e-4 | slr7058  | G0:0009124 | <1e-4 | sl11318 | G0:0016746 | <1e-4 | slr2073 | G0:0044444 | <1e-4 | sl10996 | G0:0006807 | 0.0149 |
| sl10263 | G0:0048522 | <1e-4 | sl11164  | G0:0055082 | <1e-4 | sl10443 | G0:0060089 | <1e-4 | ssl2749 | G0:0005575 | <1e-4 | sl11135 | G0:0006807 | 0.0149 |
| slr1081 | G0:0051246 | <1e-4 | slr0376  | G0:0046128 | <1e-4 | sl11527 | G0:0022857 | <1e-4 | sl11158 | G0:0044444 | <1e-4 | slr1083 | G0:0006807 | 0.0149 |
| slr0334 | G0:0046128 | <1e-4 | ssl5031  | G0:0009141 | <1e-4 | slr7098 | G0:0016462 | <1e-4 | slr6103 | G0:0044422 | <1e-4 | sl10743 | G0:0006807 | 0.0149 |
| sl11222 | G0:0009059 | <1e-4 | ssr7035  | G0:0009144 | <1e-4 | slr0579 | G0:0043167 | <1e-4 | sl10854 | G0:0005575 | <1e-4 | slr0503 | G0:0006807 | 0.0149 |
| slr0423 | G0:0043933 | <1e-4 | sl11071  | G0:0008610 | <1e-4 | sl11956 | G0:0022890 | <1e-4 | sl10913 | G0:0044444 | <1e-4 | slr0553 | G0:0006807 | 0.0149 |
| sl10843 | G0:0009987 | <1e-4 | sl10167  | G0:0008610 | <1e-4 | sl11717 | G0:0022857 | <1e-4 | sl11476 | G0:0043226 | <1e-4 | slr0299 | G0:0006807 | 0.0149 |
| slr7101 | G0:0042451 | <1e-4 | sl10658  | G0:0046483 | <1e-4 | sl11722 | G0:0022891 | <1e-4 | slr0989 | G0:0043226 | <1e-4 | slr1222 | G0:0006807 | 0.0149 |
| slr1774 | G0:0019222 | <1e-4 | slr6073  | G0:0031326 | <1e-4 | ssr0657 | G0:0016741 | <1e-4 | sl11072 | G0:0005575 | <1e-4 | slr1659 | G0:0006807 | 0.0149 |
| slr1273 | G0:0019752 | <1e-4 | slr1053  | G0:0006082 | <1e-4 | slr1270 | G0:0015291 | <1e-4 | ssr2422 | G0:0005575 | <1e-4 | slr0545 | G0:0006807 | 0.0149 |
| ssl3549 | G0:0042455 | <1e-4 | sl11289  | G0:0043933 | <1e-4 | sl10710 | G0:0043167 | <1e-4 | slr1862 | G0:0005575 | <1e-4 | slr1557 | G0:0006807 | 0.0149 |
| sl10803 | G0:0009165 | <1e-4 | sl11656  | G0:0009161 | <1e-4 | ssr6024 | G0:0022857 | <1e-4 | sl11222 | G0:0005575 | <1e-4 | slr0243 | G0:0006807 | 0.0149 |
| sl10359 | G0:0009987 | <1e-4 | sl11304  | G0:0034641 | <1e-4 | ssr1558 | G0:0015291 | <1e-4 | sl11969 | G0:0005575 | <1e-4 | sl10513 | G0:0006807 | 0.0149 |
| slr1799 | G0:0043412 | <1e-4 | slr0423  | G0:0052188 | <1e-4 | sl11784 | G0:0016818 | <1e-4 | sl10939 | G0:0044424 | <1e-4 | sl10296 | G0:0006807 | 0.0149 |
| sl10376 | G0:0080090 | <1e-4 | sl10781  | G0:0043170 | <1e-4 | sl10588 | G0:0022836 | <1e-4 | sl17033 | G0:0044464 | <1e-4 | sl11934 | G0:0006950 | 0.0147 |
| slr1570 | G0:0046394 | <1e-4 | slr1084  | G0:0065007 | <1e-4 | slr0582 | G0:0060089 | <1e-4 | slr0505 | G0:0044444 | <1e-4 | slr1391 | G0:0006950 | 0.0147 |
| sl10445 | G0:0006886 | <1e-4 | sl10802  | G0:0046394 | <1e-4 | slr2049 | G0:0015291 | <1e-4 | slr6057 | G0:0044446 | <1e-4 | slr1659 | G0:0006950 | 0.0147 |
| slr1470 | G0:0009123 | <1e-4 | slr1624  | G0:0051188 | <1e-4 | slr0913 | G0:0022836 | <1e-4 | ssl2781 | G0:0044424 | <1e-4 | slr0937 | G0:0006950 | 0.0147 |
| sl10297 | G0:0009126 | <1e-4 | sl11717  | G0:0006576 | <1e-4 | ssl2162 | G0:0008171 | <1e-4 | slr0142 | G0:0044424 | <1e-4 | slr0852 | G0:0006950 | 0.0147 |
| slr1541 | G0:0009126 | <1e-4 | slr6015  | G0:0044271 | <1e-4 | slr0211 | G0:0016741 | <1e-4 | ssl5103 | G0:0043226 | <1e-4 | ssr0536 | G0:0006950 | 0.0147 |
| slr7057 | G0:0034641 | <1e-4 | ssr2611  | G0:0052188 | <1e-4 | ssl1004 | G0:0042623 | <1e-4 | slr0810 | G0:0044422 | <1e-4 | ssr1375 | G0:0006950 | 0.0147 |
| slr0852 | G0:0071496 | <1e-4 | slr1413  | G0:0048519 | <1e-4 | sl11061 | G0:0016818 | <1e-4 | slr0453 | G0:0044422 | <1e-4 | slr1612 | G0:0006950 | 0.0147 |
| ssl1972 | G0:0044281 | <1e-4 | slr0491  | G0:0048519 | <1e-4 | sl10183 | G0:0022803 | <1e-4 | slr7081 | G0:0005575 | <1e-4 | sl10547 | G0:0006950 | 0.0147 |
| slr0605 | G0:0010556 | <1e-4 | sl16055  | G0:0071496 | <1e-4 | slr1827 | G0:0043492 | <1e-4 | slr0957 | G0:0044422 | <1e-4 | ssl0787 | G0:0006950 | 0.0147 |
| sl15028 | G0:0051179 | <1e-4 | sl10985  | G0:0051179 | <1e-4 | sl11698 | G0:0015405 | <1e-4 | slr0496 | G0:0044444 | <1e-4 | ssr1698 | G0:0006950 | 0.0147 |
| sl11477 | G0:0043648 | <1e-4 | slr2117  | G0:0019751 | <1e-4 | slr1384 | G0:0022832 | <1e-4 | sl11913 | G0:0044444 | <1e-4 | ssl3692 | G0:0006950 | 0.0147 |
| sl11119 | G0:0001932 | <1e-4 | sl10572  | G0:0016053 | <1e-4 | ssr3154 | G0:0008171 | <1e-4 | slr1391 | G0:0044464 | <1e-4 | slr1441 | G0:0006950 | 0.0147 |
| sl11658 | G0:0008610 | <1e-4 | sl11285  | G0:0050801 | <1e-4 | sl11390 | G0:0003674 | <1e-4 | sl11306 | G0:0044422 | <1e-4 | slr0545 | G0:0006950 | 0.0147 |
| sl11092 | G0:0009394 | <1e-4 | sl10181  | G0:0048523 | <1e-4 | slr6006 | G0:0015405 | <1e-4 | slr1398 | G0:0044422 | <1e-4 | sl11426 | G0:0008233 | 0.0145 |
| slr1178 | G0:0016054 | <1e-4 | slr2025  | G0:0055114 | <1e-4 | sl10611 | G0:0022803 | <1e-4 | sl17064 | G0:0043226 | <1e-4 | ssl0787 | G0:0008233 | 0.0145 |
| sl10837 | G0:0046128 | <1e-4 | sl10237  | G0:0072528 | <1e-4 | slr0408 | G0:0043167 | <1e-4 | slr1920 | G0:0044446 | <1e-4 | sl11601 | G0:0008233 | 0.0145 |
| sl17086 | G0:0044106 | <1e-4 | slr1593  | G0:0048518 | <1e-4 | slr0243 | G0:0015399 | <1e-4 | slr1495 | G0:0044422 | <1e-4 | slr0305 | G0:0008233 | 0.0145 |
| slr0587 | G0:0009259 | <1e-4 | ssl7007  | G0:0042455 | <1e-4 | slr2110 | G0:0015293 | <1e-4 | sl15130 | G0:0044446 | <1e-4 | sl11166 | G0:0008233 | 0.0145 |
| slr0930 | G0:0044255 | <1e-4 | slr7016  | G0:0055114 | <1e-4 | sl10272 | G0:0015293 | <1e-4 | slr1998 | G0:0044464 | <1e-4 | slr2025 | G0:0008233 | 0.0145 |
| slr0601 | G0:0006732 | <1e-4 | slr0103  | G0:0009132 | <1e-4 | sl11247 | G0:0016818 | <1e-4 | slr0887 | G0:0044446 | <1e-4 | sl10743 | G0:0008233 | 0.0145 |
| slr2117 | G0:0033013 | <1e-4 | slr1425  | G0:0009056 | <1e-4 | ssr3189 | G0:0015267 | <1e-4 | slr1918 | G0:0044422 | <1e-4 | slr1045 | G0:0008233 | 0.0145 |
| slr0479 | G0:0044282 | <1e-4 | sl10532  | G0:0006720 | <1e-4 | sl11025 | G0:0016746 | <1e-4 | ssl5027 | G0:0044424 | <1e-4 | slr1196 | G0:0008233 | 0.0145 |
| slr1128 | G0:0052188 | <1e-4 | sl11752  | G0:0044260 | <1e-4 | slr0356 | G0:0022890 | <1e-4 | sl11757 | G0:0044464 | <1e-4 | sl11060 | G0:0008233 | 0.0145 |
| slr1880 | G0:0051347 | <1e-4 | sl11086  | G0:0019637 | <1e-4 | slr6004 | G0:0060089 | <1e-4 | sl11547 | G0:0044422 | <1e-4 | sl10596 | G0:0008233 | 0.0145 |
| sl10875 | G0:0044248 | <1e-4 | slr1263  | G0:0051818 | <1e-4 | sl11835 | G0:0022803 | <1e-4 | sl11675 | G0:0005575 | <1e-4 | sl10513 | G0:0008233 | 0.0145 |
| slr1174 | G0:0051716 | <1e-4 | sl11160  | G0:0016054 | <1e-4 | slr1203 | G0:0015405 | <1e-4 | sl11785 | G0:0044424 | <1e-4 | sl10424 | G0:0008233 | 0.0145 |
| sl11656 | G0:0046164 | <1e-4 | slr0082  | G0:0051188 | <1e-4 | sl10853 | G0:0016817 | <1e-4 | slr0262 | G0:0044444 | <1e-4 | sl11186 | G0:0008233 | 0.0145 |
| ssl0410 | G0:0006721 | <1e-4 | sl11411  | G0:0019752 | <1e-4 | slr7059 | G0:0015267 | <1e-4 | slr1547 | G0:0043226 | <1e-4 | slr1866 | G0:0008233 | 0.0145 |
| ssl5008 | G0:0048878 | <1e-4 | slr0848  | G0:0031323 | <1e-4 | ssr3154 | G0:0043167 | <1e-4 | slr0238 | G0:0043226 | <1e-4 | slr0304 | G0:0008233 | 0.0145 |
| sl11469 | G0:0009161 | <1e-4 | sl10751  | G0:0008610 | <1e-4 | sl11219 | G0:0022836 | <1e-4 | sl11834 | G0:0005575 | <1e-4 | slr0545 | G0:0008233 | 0.0145 |
| sl10381 | G0:0043436 | <1e-4 | slr2110  | G0:0042451 | <1e-4 | sl11381 | G0:0016462 | <1e-4 | sl12013 | G0:0044425 | <1e-4 | ssr0536 | G0:0008233 | 0.0145 |
| slr1911 | G0:0072521 | <1e-4 | sl115128 | G0:0009987 | <1e-4 | ssl5100 | G0:0016818 | <1e-4 | sl11131 | G0:0043226 | <1e-4 | slr1417 | G0:0008233 | 0.0145 |
| sl11866 | G0:0048523 | <1e-4 | ssl1923  | G0:0034641 | <1e-4 | ssl5045 | G0:0022890 | <1e-4 | slr1601 | G0:0043226 | <1e-4 | slr0551 | G0:0008233 | 0.0145 |
| sl17070 | G0:0009057 | <1e-4 | slr1762  | G0:0050896 | <1e-4 | slr0269 | G0:0022838 | <1e-4 | sl11464 | G0:0044422 | <1e-4 | sl10354 | G0:0008233 | 0.0145 |
| slr1866 | G0:0044282 | <1e-4 | slr0272  | G0:0051716 | <1e-4 | ssr6032 | G0:0015267 | <1e-4 | slr1616 | G0:0043226 | <1e-4 | slr0937 | G0:0008233 | 0.0145 |
| slr6103 | G0:0042180 | <1e-4 | slr0455  | G0:0048878 | <1e-4 | slr0971 | G0:0015399 | <1e-4 | slr1343 | G0:0043226 | <1e-4 | sl10499 | G0:0008233 | 0.0145 |

s111526 G0:0042180 <1e-4 s1r0870 G0:0009126 <1e-4 s1r8022 G0:0015077 <1e-4 s117070 G0:0044422 <1e-4 s111433 G0:0008233 0.0145  
s1r1638 G0:0019219 <1e-4 s110997 G0:0005996 <1e-4 s1r0456 G0:0016817 <1e-4 s1r7097 G0:0044444 <1e-4 s110931 G0:0005975 0.0144  
s1r1505 G0:0065007 <1e-4 s1r6104 G0:0022411 <1e-4 s1r0168 G0:0043492 <1e-4 s110268 G0:0044446 <1e-4 s110068 G0:0005515 0.0142  
s1r2615 G0:0006811 <1e-4 s110505 G0:0016053 <1e-4 s1r0333 G0:0022832 <1e-4 s1r3304 G0:0044464 <1e-4 s110596 G0:0006259 0.0141  
s1r1398 G0:0016052 <1e-4 s110786 G0:0065007 <1e-4 s111433 G0:0022803 <1e-4 s1r2317 G0:0044422 <1e-4 s111166 G0:0006259 0.0141  
s1r2803 G0:0072524 <1e-4 s111160 G0:0006576 <1e-4 s111775 G0:0005342 <1e-4 s1r0317 G0:0043226 <1e-4 s111318 G0:0006259 0.0141  
s1r0689 G0:0009117 <1e-4 s111426 G0:0071840 <1e-4 s117077 G0:0015399 <1e-4 s1r1266 G0:0044422 <1e-4 s111913 G0:0006259 0.0141  
s1r1558 G0:0051188 <1e-4 s1r1384 G0:0072524 <1e-4 s118040 G0:0015267 <1e-4 s110638 G0:0043226 <1e-4 s110447 G0:0006259 0.0141  
s1r6007 G0:0006720 <1e-4 s1r0787 G0:0009987 <1e-4 s110871 G0:0022857 <1e-4 s1r1537 G0:0044425 <1e-4 s1r0287 G0:0006259 0.0141  
s1r0483 G0:0016053 <1e-4 s110101 G0:0043549 <1e-4 s1r0655 G0:0016741 <1e-4 s111388 G0:0043226 <1e-4 s110547 G0:0006259 0.0141  
s115064 G0:0019752 <1e-4 s1r1900 G0:0043436 <1e-4 s1r2111 G0:0060089 <1e-4 s1r6046 G0:0005575 <1e-4 s1r1799 G0:0006259 0.0141  
s111960 G0:0055082 <1e-4 s1r1576 G0:0048878 <1e-4 s111542 G0:0015399 <1e-4 s111505 G0:0044422 <1e-4 s110508 G0:0006259 0.0141  
s111092 G0:0016052 <1e-4 s111528 G0:0001932 <1e-4 s110553 G0:0016818 <1e-4 s1r1079 G0:0044422 <1e-4 s110513 G0:0006259 0.0141  
s110981 G0:0009394 <1e-4 s110060 G0:0050801 <1e-4 s1r7102 G0:0043167 <1e-4 s111089 G0:0044422 <1e-4 s110743 G0:0006259 0.0141  
s111630 G0:0009308 <1e-4 s117070 G0:0009263 <1e-4 s1r1762 G0:0015075 <1e-4 s110669 G0:0044444 <1e-4 s110354 G0:0019538 0.014  
s1r0108 G0:0006576 <1e-4 s110238 G0:0009987 <1e-4 s115015 G0:0022803 <1e-4 s1r1612 G0:0044444 <1e-4 s1r0287 G0:0019538 0.014  
s1r7071 G0:0051246 <1e-4 s1r1068 G0:0009144 <1e-4 s1r0479 G0:0015405 <1e-4 s1r0147 G0:0005575 <1e-4 s110854 G0:0019538 0.014  
s1r0393 G0:0008150 <1e-4 s1r0590 G0:0072521 <1e-4 s110586 G0:0016462 <1e-4 s111749 G0:0044446 <1e-4 s111601 G0:0019538 0.014  
s110355 G0:0052111 <1e-4 s1r0976 G0:0009987 <1e-4 s110412 G0:0022892 <1e-4 s1r1752 G0:0043226 <1e-4 s1r0376 G0:0019538 0.014  
s1r0594 G0:0044283 <1e-4 s1r2975 G0:0051171 <1e-4 s111562 G0:0016462 <1e-4 s1r1951 G0:0044446 <1e-4 s110263 G0:0019538 0.014  
s1r5120 G0:0009142 <1e-4 s1r5018 G0:0051171 <1e-4 s1r1599 G0:0015293 <1e-4 s110781 G0:0043226 <1e-4 s110109 G0:0019538 0.014  
s1r2120 G0:0072527 <1e-4 s111552 G0:0048523 <1e-4 s1r0204 G0:0015267 <1e-4 s1r2115 G0:0044422 <1e-4 s1r1107 G0:0019538 0.014  
s110982 G0:0034641 <1e-4 s1r8022 G0:0009991 <1e-4 s110023 G0:0005342 <1e-4 s1r1670 G0:0044446 <1e-4 s110296 G0:0019538 0.014  
s1r0102 G0:0046483 <1e-4 s1r1073 G0:0019219 <1e-4 s110412 G0:0016462 <1e-4 s1r1530 G0:0005575 <1e-4 s111426 G0:0019538 0.014  
s111541 G0:0034660 <1e-4 s111251 G0:0009117 <1e-4 s111319 G0:0043167 <1e-4 s1r1442 G0:0044446 <1e-4 s1r0536 G0:0019538 0.014  
s1r1074 G0:0042455 <1e-4 s111447 G0:0008150 <1e-4 s111918 G0:0015399 <1e-4 s1r7101 G0:0044464 <1e-4 s1r2848 G0:0019538 0.014  
s1r6094 G0:0009161 <1e-4 s111411 G0:0033013 <1e-4 s110659 G0:0042623 <1e-4 s1r0771 G0:0044446 <1e-4 s111186 G0:0019538 0.014  
s110189 G0:0031326 <1e-4 s111526 G0:0006732 <1e-4 s1r1032 G0:0016817 <1e-4 s110513 G0:0044422 <1e-4 s110846 G0:0019538 0.0139  
s110172 G0:0009144 <1e-4 s1r1263 G0:0022607 <1e-4 s117086 G0:0015291 <1e-4 s111254 G0:0044425 <1e-4 s1r6014 G0:0019538 0.0139  
s111155 G0:0009199 <1e-4 s1r7058 G0:0009309 <1e-4 s1r1528 G0:0005342 <1e-4 s1r6032 G0:0044425 <1e-4 s1r2422 G0:0019538 0.0139  
s117086 G0:0006766 <1e-4 s1r0695 G0:0006753 <1e-4 s1r0975 G0:0008171 <1e-4 s111446 G0:0005575 <1e-4 s111921 G0:0019538 0.0139  
s1r1340 G0:0006066 <1e-4 s1r0789 G0:0009165 <1e-4 s111300 G0:0022857 <1e-4 s1r1083 G0:0044444 <1e-4 s110481 G0:0019538 0.0139  
s1r1398 G0:0006163 <1e-4 s1r3402 G0:0048519 <1e-4 s1r6074 G0:0016817 <1e-4 s110586 G0:0043226 <1e-4 s1r0695 G0:0019538 0.0139  
s115100 G0:0080090 <1e-4 s1r1342 G0:0022607 <1e-4 s118039 G0:0042623 <1e-4 s112064 G0:0044422 <1e-4 s110886 G0:0019538 0.0139  
s111426 G0:0006066 <1e-4 s1r0519 G0:0009124 <1e-4 s111355 G0:0015405 <1e-4 s1r0582 G0:0044464 <1e-4 s110293 G0:0019538 0.0139  
s110481 G0:0042455 <1e-4 s1r1474 G0:0044248 <1e-4 s1r6003 G0:0016818 <1e-4 s117028 G0:0005575 <1e-4 s1r6004 G0:0019538 0.0139  
s1r5053 G0:0016053 <1e-4 s110283 G0:0051186 <1e-4 s110321 G0:0043167 <1e-4 s1r5115 G0:0044425 <1e-4 s1r6026 G0:0019538 0.0139  
s111472 G0:0048878 <1e-4 s111095 G0:0044248 <1e-4 s1r1541 G0:0022892 <1e-4 s1r1218 G0:0044464 <1e-4 s111414 G0:0019538 0.0139  
s110354 G0:0052188 <1e-4 s1r2080 G0:0071841 <1e-4 s1r1081 G0:0015075 <1e-4 s110180 G0:0044444 <1e-4 s111162 G0:0019538 0.0139  
s111583 G0:0006721 <1e-4 s1r6038 G0:0031640 <1e-4 s111053 G0:0015267 <1e-4 s1r1207 G0:0044464 <1e-4 s1r0407 G0:0019538 0.0139  
s1r2318 G0:0009161 <1e-4 s1r6067 G0:0051716 <1e-4 s111477 G0:0005342 <1e-4 s110085 G0:0044464 <1e-4 s111396 G0:0019538 0.0139  
s1r5037 G0:0044003 <1e-4 s1r1288 G0:0051188 <1e-4 s1r0272 G0:0015267 <1e-4 s1r0575 G0:0044444 <1e-4 s1r1566 G0:0019538 0.0139  
s110354 G0:0060255 <1e-4 s112384 G0:0044106 <1e-4 s1r5018 G0:0043167 <1e-4 s111170 G0:0044446 <1e-4 s1r2101 G0:0019538 0.0139  
s1r0581 G0:0019362 <1e-4 s1r0761 G0:0044003 <1e-4 s111651 G0:0043167 <1e-4 s111954 G0:0005575 <1e-4 s1r7014 G0:0019538 0.0139  
s1r5087 G0:0034641 <1e-4 s1r0505 G0:0008150 <1e-4 s110447 G0:0016746 <1e-4 s1r1431 G0:0005575 <1e-4 s111552 G0:0019538 0.0139  
s113549 G0:0009991 <1e-4 s111192 G0:0071496 <1e-4 s110985 G0:0042623 <1e-4 s111054 G0:0044444 <1e-4 s111464 G0:0019538 0.0139  
s110623 G0:0071842 <1e-4 s1r0299 G0:0009987 <1e-4 s1r1413 G0:0022803 <1e-4 s1r7024 G0:0005575 <1e-4 s1r1362 G0:0019538 0.0139  
s110793 G0:0008610 <1e-4 s110756 G0:0009394 <1e-4 s111163 G0:0008171 <1e-4 s117063 G0:0043226 <1e-4 s1r6079 G0:0019538 0.0139  
s111832 G0:0006082 <1e-4 s110249 G0:0019637 <1e-4 s110011 G0:0015075 <1e-4 s1r1914 G0:0044425 <1e-4 s115095 G0:0019538 0.0139  
s111472 G0:0009059 <1e-4 s1r2318 G0:0072524 <1e-4 s1r0287 G0:0015267 <1e-4 s1r0871 G0:0044424 <1e-4 s1r0598 G0:0019538 0.0139  
s111219 G0:0065007 <1e-4 s110995 G0:0042451 <1e-4 s111072 G0:0043492 <1e-4 s1r1045 G0:0044422 <1e-4 s1r6065 G0:0019538 0.0139  
s115096 G0:0009057 <1e-4 s111401 G0:0009056 <1e-4 s1r1537 G0:0060089 <1e-4 s111170 G0:0044464 <1e-4 s113142 G0:0019538 0.0139  
s112814 G0:0044281 <1e-4 s1r1023 G0:0009141 <1e-4 s111749 G0:0022803 <1e-4 s1r1958 G0:0044446 <1e-4 s110400 G0:0019538 0.0139  
s1r0605 G0:0006576 <1e-4 s1r1468 G0:0072522 <1e-4 s1r1591 G0:0016462 <1e-4 s110085 G0:0005575 <1e-4 s117063 G0:0019538 0.0139

ssr0759 G0:0044260 <1e-4 sll0596 G0:0009150 <1e-4 slr0326 G0:0016746 <1e-4 slr0204 G0:0043226 <1e-4 slr5118 G0:0019538 0.0139  
 sll1691 G0:0019222 <1e-4 ssr5019 G0:0044106 <1e-4 sll0539 G0:0022891 <1e-4 sll1608 G0:0043226 <1e-4 slr2032 G0:0019538 0.0139  
 sll1350 G0:0043412 <1e-4 slr1591 G0:0006766 <1e-4 slr1847 G0:0015077 <1e-4 slr0209 G0:0044422 <1e-4 slr7058 G0:0019538 0.0139  
 sll5046 G0:0046483 <1e-4 sll3291 G0:0006720 <1e-4 sll1160 G0:0042623 <1e-4 slr0105 G0:0044446 <1e-4 sll0863 G0:0019538 0.0139  
 ssr0657 G0:0043549 <1e-4 ssr3129 G0:0019219 <1e-4 slr0092 G0:0022857 <1e-4 sll0639 G0:0044444 <1e-4 sll1939 G0:0019538 0.0139  
 sll10394 G0:0006091 <1e-4 sll0832 G0:0042451 <1e-4 sll10787 G0:0022803 <1e-4 ssr6024 G0:0044425 <1e-4 sll1217 G0:0019538 0.0139  
 sll1680 G0:0072521 <1e-4 sll1304 G0:0046483 <1e-4 sll10181 G0:0042623 <1e-4 slr1161 G0:0044444 <1e-4 slr1189 G0:0019538 0.0139  
 sll1174 G0:0009987 <1e-4 slr0264 G0:0045184 <1e-4 slr0147 G0:0016746 <1e-4 slr0784 G0:0044444 <1e-4 slr6007 G0:0019538 0.0139  
 slr1519 G0:0044281 <1e-4 sll1915 G0:0006720 <1e-4 sll15033 G0:0022803 <1e-4 slr1398 G0:0043226 <1e-4 slr1815 G0:0019538 0.0139  
 slr1800 G0:0022411 <1e-4 slr1183 G0:0043170 <1e-4 slr1773 G0:0022892 <1e-4 sll17078 G0:0005575 <1e-4 sll10436 G0:0019538 0.0139  
 sll0449 G0:0034654 <1e-4 slr0975 G0:0044260 <1e-4 slr6088 G0:0022838 <1e-4 ssr2787 G0:0044464 <1e-4 slr0971 G0:0019538 0.0139  
 sll1632 G0:0071840 <1e-4 sll1651 G0:0046907 <1e-4 slr0708 G0:0042623 <1e-4 sll10763 G0:0044446 <1e-4 sll11022 G0:0019538 0.0139  
 slr1450 G0:0019219 <1e-4 slr1917 G0:0009126 <1e-4 sll11109 G0:0043167 <1e-4 slr1956 G0:0005575 <1e-4 ss12749 G0:0019538 0.0139  
 sll10361 G0:0045184 <1e-4 slr0207 G0:0006811 <1e-4 sll10410 G0:0015291 <1e-4 ssr3402 G0:0005575 <1e-4 ssr3410 G0:0019538 0.0139  
 ssr5092 G0:0009126 <1e-4 ssr8047 G0:0009132 <1e-4 slr1025 G0:0042623 <1e-4 ss13451 G0:0044424 <1e-4 ssr0332 G0:0019538 0.0139  
 slr0821 G0:0071496 <1e-4 sll1461 G0:0031323 <1e-4 sll10985 G0:0016462 <1e-4 slr6071 G0:0005575 <1e-4 ss18005 G0:0019538 0.0139  
 sll1658 G0:0051716 <1e-4 slr0821 G0:0006082 <1e-4 ssr2781 G0:0008171 <1e-4 ss10750 G0:0044422 <1e-4 slr1907 G0:0019538 0.0139  
 slr0967 G0:0042451 <1e-4 slr6072 G0:0034654 <1e-4 sll11135 G0:0015075 <1e-4 sll11132 G0:0044464 <1e-4 slr5021 G0:0019538 0.0139  
 sll1352 G0:0044260 <1e-4 slr2012 G0:0043549 <1e-4 sll11942 G0:0043167 <1e-4 sll10177 G0:0044444 <1e-4 slr1814 G0:0019538 0.0139  
 ss18039 G0:0043933 <1e-4 sll0350 G0:0009165 <1e-4 slr0337 G0:0022890 <1e-4 sll10760 G0:0044444 <1e-4 slr6067 G0:0019538 0.0139  
 sll10147 G0:0009142 <1e-4 ssr1473 G0:0044255 <1e-4 sll11583 G0:0016818 <1e-4 sll10861 G0:0044446 <1e-4 slr1315 G0:0019538 0.0139  
 sll1396 G0:0009126 <1e-4 slr7094 G0:0006733 <1e-4 sll18019 G0:0015075 <1e-4 slr0480 G0:0044424 <1e-4 sll15062 G0:0019538 0.0139  
 slr0241 G0:0006220 <1e-4 slr1079 G0:0009987 <1e-4 sll10297 G0:0005342 <1e-4 ssr2554 G0:0044424 <1e-4 sll1461 G0:0019538 0.0139  
 slr1183 G0:0051179 <1e-4 slr1762 G0:0050801 <1e-4 slr0264 G0:0015293 <1e-4 slr7011 G0:0005575 <1e-4 sll10284 G0:0019538 0.0139  
 slr1816 G0:0006811 <1e-4 sll10414 G0:0009260 <1e-4 slr0625 G0:0015077 <1e-4 slr1441 G0:0005575 <1e-4 slr1546 G0:0019538 0.0139  
 sll10444 G0:0060255 <1e-4 sll10913 G0:0006721 <1e-4 sll11714 G0:0015405 <1e-4 ss15099 G0:0043226 <1e-4 ss11004 G0:0019538 0.0139  
 sll1192 G0:0019752 <1e-4 sll2971 G0:0051716 <1e-4 ssr2067 G0:0003674 <1e-4 slr1572 G0:0044444 <1e-4 slr1340 G0:0019538 0.0139  
 slr1195 G0:0048523 <1e-4 sll10443 G0:0071842 <1e-4 ss15091 G0:0022836 <1e-4 ss13451 G0:0044422 <1e-4 ss12781 G0:0019538 0.0139  
 sll15130 G0:0034641 <1e-4 sll10208 G0:0043412 <1e-4 sll18007 G0:0043492 <1e-4 slr6065 G0:0044422 <1e-4 sll10659 G0:0019538 0.0139  
 sll10563 G0:0042180 <1e-4 slr1852 G0:0009161 <1e-4 sll11251 G0:0022891 <1e-4 sll15047 G0:0044446 <1e-4 ssr2554 G0:0019538 0.0139  
 sll11714 G0:0009308 <1e-4 sll15062 G0:0046907 <1e-4 slr7094 G0:0016818 <1e-4 sll1188 G0:0043226 <1e-4 ss12420 G0:0019538 0.0139  
 slr1970 G0:0009987 <1e-4 slr1495 G0:0006082 <1e-4 sll11071 G0:0016741 <1e-4 slr6103 G0:0044424 <1e-4 sll11155 G0:0019538 0.0139  
 sll15004 G0:0048519 <1e-4 sll10827 G0:0046128 <1e-4 slr11162 G0:0022836 <1e-4 slr0553 G0:0044425 <1e-4 sll11092 G0:0019538 0.0139  
 sll1866 G0:0051186 <1e-4 slr1690 G0:0022607 <1e-4 sll10382 G0:0015405 <1e-4 ssr3402 G0:0044422 <1e-4 slr7097 G0:0019538 0.0139  
 sll10249 G0:0022411 <1e-4 slr0483 G0:0042455 <1e-4 slr1493 G0:0022892 <1e-4 ss13615 G0:0005575 <1e-4 sll10498 G0:0019538 0.0139  
 sll10447 G0:0043648 <1e-4 slr0551 G0:0009142 <1e-4 slr0780 G0:0016462 <1e-4 slr0602 G0:0005575 <1e-4 sll11160 G0:0019538 0.0139  
 ssr2802 G0:0044275 <1e-4 sll10815 G0:0045184 <1e-4 ssr6083 G0:0016817 <1e-4 sll11638 G0:0005575 <1e-4 sll11651 G0:0019538 0.0139  
 slr1398 G0:0006091 <1e-4 sll10350 G0:0031326 <1e-4 slr7092 G0:0022891 <1e-4 ssr0336 G0:0043226 <1e-4 sll15047 G0:0019538 0.0139  
 sll1586 G0:0031640 <1e-4 slr1767 G0:0019637 <1e-4 slr1082 G0:0016462 <1e-4 sll11510 G0:0044422 <1e-4 slr0393 G0:0019538 0.0139  
 slr1104 G0:0019752 <1e-4 sll11164 G0:0010556 <1e-4 sll10181 G0:0015293 <1e-4 sll11613 G0:0044425 <1e-4 ss15007 G0:0019538 0.0139  
 sll1232 G0:0046128 <1e-4 ssr0761 G0:0051716 <1e-4 sll17069 G0:0042623 <1e-4 slr0302 G0:0044422 <1e-4 ss10461 G0:0019538 0.0139  
 slr6073 G0:0044282 <1e-4 sll11541 G0:0019222 <1e-4 slr5018 G0:0015077 <1e-4 slr1122 G0:0044446 <1e-4 sll11696 G0:0019538 0.0139  
 slr0725 G0:0019752 <1e-4 sll10803 G0:0046394 <1e-4 sll11315 G0:0005342 <1e-4 ssr3571 G0:0044446 <1e-4 sll10710 G0:0019538 0.0139  
 slr0333 G0:0009132 <1e-4 sll11949 G0:0034654 <1e-4 slr0545 G0:0015075 <1e-4 sll17033 G0:0044444 <1e-4 sll11401 G0:0019538 0.0139  
 sll10775 G0:0009165 <1e-4 slr0978 G0:0048518 <1e-4 sll11350 G0:0042623 <1e-4 ssr3409 G0:0044464 <1e-4 sll10265 G0:0019538 0.0139  
 sll11411 G0:0043436 <1e-4 sll11119 G0:0006753 <1e-4 ssr2962 G0:0022803 <1e-4 sll10703 G0:0005575 <1e-4 sll11722 G0:0019538 0.0139  
 sll10780 G0:0046483 <1e-4 slr1958 G0:0051246 <1e-4 slr1565 G0:0015405 <1e-4 slr0076 G0:0044424 <1e-4 slr1384 G0:0019538 0.0139  
 slr1327 G0:0009991 <1e-4 slr1032 G0:0042451 <1e-4 sll11722 G0:0016817 <1e-4 sll10565 G0:0044422 <1e-4 sll15026 G0:0019538 0.0139  
 slr1396 G0:0055082 <1e-4 slr0305 G0:0034654 <1e-4 ssr6086 G0:0016817 <1e-4 slr1907 G0:0005575 <1e-4 slr1161 G0:0019538 0.0139  
 sll10691 G0:0009056 <1e-4 slr6067 G0:0009126 <1e-4 sll10085 G0:0022857 <1e-4 slr0038 G0:0005575 <1e-4 slr0168 G0:0019538 0.0139  
 slr1045 G0:0051716 <1e-4 ssr5020 G0:0009124 <1e-4 slr1977 G0:0015399 <1e-4 slr1301 G0:0044446 <1e-4 sll11355 G0:0019538 0.0139  
 slr1534 G0:0019751 <1e-4 slr0238 G0:0055114 <1e-4 slr0058 G0:0005342 <1e-4 slr5111 G0:0044446 <1e-4 sll10423 G0:0019538 0.0139  
 sll10847 G0:0019751 <1e-4 slr0579 G0:0009132 <1e-4 ss15095 G0:0022803 <1e-4 sll10539 G0:0005575 <1e-4 sll10473 G0:0019538 0.0139  
 sll1765 G0:0051171 <1e-4 slr0270 G0:0006091 <1e-4 ss11498 G0:0015293 <1e-4 sll11660 G0:0044444 <1e-4 ss12717 G0:0019538 0.0139

|          |            |       |          |            |       |          |            |       |          |            |       |          |            |        |
|----------|------------|-------|----------|------------|-------|----------|------------|-------|----------|------------|-------|----------|------------|--------|
| ssl3379  | G0:0042180 | <1e-4 | slr2011  | G0:0080090 | <1e-4 | slr1534  | G0:0022838 | <1e-4 | slr1964  | G0:0044446 | <1e-4 | slr0769  | G0:0019538 | 0.0139 |
| sll1785  | G0:0051179 | <1e-4 | sll10436 | G0:0016054 | <1e-4 | sll11006 | G0:0015075 | <1e-4 | slr0169  | G0:0043226 | <1e-4 | sll11348 | G0:0019538 | 0.0139 |
| slr0458  | G0:0009889 | <1e-4 | slr1223  | G0:0031323 | <1e-4 | slr1690  | G0:0016741 | <1e-4 | sll11715 | G0:0044446 | <1e-4 | slr0606  | G0:0019538 | 0.0139 |
| ssr0335  | G0:0046128 | <1e-4 | ssl3379  | G0:0046128 | <1e-4 | slr6033  | G0:0015291 | <1e-4 | sll10743 | G0:0044444 | <1e-4 | ssr1951  | G0:0006396 | 0.0137 |
| sll10565 | G0:0044260 | <1e-4 | slr1547  | G0:0042180 | <1e-4 | sll11722 | G0:0015077 | <1e-4 | ssr3189  | G0:0044444 | <1e-4 | ss13451  | G0:0006396 | 0.0137 |
| sll18032 | G0:0009308 | <1e-4 | slr0358  | G0:0009987 | <1e-4 | slr7091  | G0:0022857 | <1e-4 | sll11775 | G0:0044444 | <1e-4 | sll10545 | G0:0006396 | 0.0137 |
| sll0263  | G0:0006793 | <1e-4 | sll10590 | G0:0072521 | <1e-4 | slr0725  | G0:0022832 | <1e-4 | sll11853 | G0:0044422 | <1e-4 | ss15099  | G0:0006396 | 0.0137 |
| slr0699  | G0:0009394 | <1e-4 | slr5118  | G0:0034654 | <1e-4 | ssr3129  | G0:0016818 | <1e-4 | ssr1041  | G0:0044464 | <1e-4 | sll10167 | G0:0006396 | 0.0137 |
| sll11130 | G0:0006631 | <1e-4 | sll10736 | G0:0055086 | <1e-4 | sll10558 | G0:0015075 | <1e-4 | sll11025 | G0:0043226 | <1e-4 | slr7014  | G0:0006396 | 0.0137 |
| sll11570 | G0:0009260 | <1e-4 | slr1774  | G0:0080090 | <1e-4 | slr0144  | G0:0016741 | <1e-4 | ssr6085  | G0:0044422 | <1e-4 | sll11378 | G0:0006396 | 0.0137 |
| slr0519  | G0:0046128 | <1e-4 | ssl0832  | G0:0071841 | <1e-4 | ss18003  | G0:0016741 | <1e-4 | slr2103  | G0:0044422 | <1e-4 | sll11252 | G0:0006396 | 0.0137 |
| slr0651  | G0:0009308 | <1e-4 | slr5016  | G0:0008150 | <1e-4 | ss10832  | G0:0022857 | <1e-4 | slr1854  | G0:0044424 | <1e-4 | sll10436 | G0:0006396 | 0.0137 |
| slr1034  | G0:0046164 | <1e-4 | sll1252  | G0:0016054 | <1e-4 | sll11961 | G0:0015267 | <1e-4 | slr8021  | G0:0005575 | <1e-4 | slr1472  | G0:0006396 | 0.0137 |
| sll10837 | G0:0009123 | <1e-4 | slr0184  | G0:0016052 | <1e-4 | sll11761 | G0:0060089 | <1e-4 | sll10445 | G0:0044444 | <1e-4 | ssr6079  | G0:0006396 | 0.0137 |
| ssl2920  | G0:0046164 | <1e-4 | slr1535  | G0:0009141 | <1e-4 | slr1977  | G0:0022838 | <1e-4 | slr6005  | G0:0044424 | <1e-4 | slr0569  | G0:0006396 | 0.0137 |
| sll10590 | G0:0009260 | <1e-4 | sll11239 | G0:0009132 | <1e-4 | slr0269  | G0:0043492 | <1e-4 | sll15090 | G0:0044446 | <1e-4 | sll10487 | G0:0006396 | 0.0137 |
| sll10176 | G0:0052111 | <1e-4 | ssl3692  | G0:0006733 | <1e-4 | slr7025  | G0:0008171 | <1e-4 | slr1534  | G0:0044422 | <1e-4 | slr0146  | G0:0006396 | 0.0137 |
| slr0709  | G0:0009893 | <1e-4 | slr1915  | G0:0055114 | <1e-4 | sll11233 | G0:0042623 | <1e-4 | slr0142  | G0:0044446 | <1e-4 | slr1568  | G0:0006396 | 0.0137 |
| slr0634  | G0:0071842 | <1e-4 | slr0890  | G0:0009132 | <1e-4 | sll11715 | G0:0015399 | <1e-4 | ss11792  | G0:0044444 | <1e-4 | slr7095  | G0:0006396 | 0.0137 |
| sll10875 | G0:0019751 | <1e-4 | sll10676 | G0:0006766 | <1e-4 | slr1699  | G0:0015077 | <1e-4 | slr1273  | G0:0005575 | <1e-4 | slr0971  | G0:0006396 | 0.0137 |
| ssr2611  | G0:0006163 | <1e-4 | ssr6083  | G0:0009141 | <1e-4 | slr1178  | G0:0015291 | <1e-4 | ssr6086  | G0:0005575 | <1e-4 | sll10448 | G0:0006396 | 0.0137 |
| sll1656  | G0:0016054 | <1e-4 | sll10174 | G0:0071496 | <1e-4 | sll11965 | G0:0022836 | <1e-4 | slr1087  | G0:0005575 | <1e-4 | sll10872 | G0:0006396 | 0.0137 |
| ssr1114  | G0:0051716 | <1e-4 | sll15028 | G0:0072524 | <1e-4 | slr1102  | G0:0042623 | <1e-4 | slr1087  | G0:0044424 | <1e-4 | sll12013 | G0:0006396 | 0.0137 |
| sll10238 | G0:0048878 | <1e-4 | sll11380 | G0:0009059 | <1e-4 | sll17087 | G0:0015267 | <1e-4 | slr6007  | G0:0044424 | <1e-4 | ss15095  | G0:0006396 | 0.0137 |
| sll10781 | G0:0044260 | <1e-4 | sll11722 | G0:0019222 | <1e-4 | sll11979 | G0:0005342 | <1e-4 | sll11509 | G0:0044422 | <1e-4 | slr0264  | G0:0006396 | 0.0137 |
| slr1069  | G0:0009259 | <1e-4 | ssr0761  | G0:0043933 | <1e-4 | slr1342  | G0:0003674 | <1e-4 | sll10148 | G0:0044425 | <1e-4 | sll11638 | G0:0006396 | 0.0137 |
| slr2071  | G0:0048523 | <1e-4 | ssl2384  | G0:0051171 | <1e-4 | ssr7084  | G0:0015075 | <1e-4 | sll10867 | G0:0043226 | <1e-4 | ss11417  | G0:0006396 | 0.0137 |
| ssl2749  | G0:0009141 | <1e-4 | sll10803 | G0:0009142 | <1e-4 | sll10230 | G0:0022891 | <1e-4 | sll11608 | G0:0005575 | <1e-4 | sll10008 | G0:0006396 | 0.0137 |
| slr2010  | G0:0050789 | <1e-4 | sll1832  | G0:0051179 | <1e-4 | sll10230 | G0:0016746 | <1e-4 | ss13573  | G0:0044464 | <1e-4 | sll15032 | G0:0006396 | 0.0137 |
| sll10863 | G0:0052188 | <1e-4 | slr1819  | G0:0019219 | <1e-4 | sll11630 | G0:0022803 | <1e-4 | slr0755  | G0:0044464 | <1e-4 | ssr0102  | G0:0006396 | 0.0137 |
| sll11763 | G0:0050789 | <1e-4 | slr1670  | G0:0044106 | <1e-4 | ssr7072  | G0:0015293 | <1e-4 | slr1340  | G0:0044425 | <1e-4 | ssr0335  | G0:0006396 | 0.0137 |
| sll10066 | G0:0033013 | <1e-4 | sll11352 | G0:0065007 | <1e-4 | sll11563 | G0:0015399 | <1e-4 | slr1811  | G0:0005575 | <1e-4 | ss10312  | G0:0006396 | 0.0137 |
| sll10172 | G0:0019752 | <1e-4 | slr6005  | G0:0009259 | <1e-4 | slr1601  | G0:0022803 | <1e-4 | slr2037  | G0:0043226 | <1e-4 | slr1306  | G0:0006396 | 0.0137 |
| slr0885  | G0:0009987 | <1e-4 | ssr5020  | G0:0051188 | <1e-4 | sll10060 | G0:0016817 | <1e-4 | sll11938 | G0:0044425 | <1e-4 | sll10762 | G0:0006396 | 0.0137 |
| ssr7072  | G0:0051188 | <1e-4 | sll11680 | G0:0009987 | <1e-4 | slr1396  | G0:0015267 | <1e-4 | slr1618  | G0:0044444 | <1e-4 | slr0038  | G0:0006396 | 0.0137 |
| sll11381 | G0:0034660 | <1e-4 | slr1547  | G0:0055086 | <1e-4 | slr1611  | G0:0043167 | <1e-4 | ss17038  | G0:0044464 | <1e-4 | sll10913 | G0:0006396 | 0.0137 |
| slr1863  | G0:0009893 | <1e-4 | slr1896  | G0:0044106 | <1e-4 | sll10847 | G0:0043492 | <1e-4 | sll15089 | G0:0044444 | <1e-4 | slr1365  | G0:0006396 | 0.0137 |
| ssl2245  | G0:0072521 | <1e-4 | slr0291  | G0:0019222 | <1e-4 | slr1023  | G0:0015291 | <1e-4 | sll10780 | G0:0044425 | <1e-4 | slr2118  | G0:0006396 | 0.0137 |
| slr0930  | G0:0072522 | <1e-4 | slr0294  | G0:0050789 | <1e-4 | ssr2998  | G0:0022836 | <1e-4 | slr0655  | G0:0043226 | <1e-4 | sll15097 | G0:0006396 | 0.0137 |
| ssr2781  | G0:0009123 | <1e-4 | sll11702 | G0:0009394 | <1e-4 | slr0241  | G0:0005342 | <1e-4 | slr0491  | G0:0044464 | <1e-4 | slr0145  | G0:0006396 | 0.0137 |
| slr0692  | G0:0006163 | <1e-4 | slr1168  | G0:0051179 | <1e-4 | sll10473 | G0:0015291 | <1e-4 | slr6065  | G0:0044446 | <1e-4 | slr1814  | G0:0006396 | 0.0137 |
| slr1577  | G0:0048518 | <1e-4 | ssl0788  | G0:0018130 | <1e-4 | sll10479 | G0:0022892 | <1e-4 | slr1034  | G0:0043226 | <1e-4 | slr1470  | G0:0006396 | 0.0137 |
| sll11131 | G0:0044283 | <1e-4 | sll10230 | G0:0055114 | <1e-4 | slr0521  | G0:0016741 | <1e-4 | ss10294  | G0:0043226 | <1e-4 | sll11062 | G0:0006396 | 0.0137 |
| ssr2972  | G0:0006753 | <1e-4 | slr1097  | G0:0006811 | <1e-4 | sll11882 | G0:0022803 | <1e-4 | sll11702 | G0:0044464 | <1e-4 | sll10168 | G0:0006396 | 0.0137 |
| slr0006  | G0:0016052 | <1e-4 | slr0521  | G0:0043549 | <1e-4 | sll10141 | G0:0015077 | <1e-4 | slr7092  | G0:0044464 | <1e-4 | slr1464  | G0:0006396 | 0.0137 |
| ssl5025  | G0:0009394 | <1e-4 | slr1737  | G0:0050801 | <1e-4 | slr0664  | G0:0008171 | <1e-4 | slr0105  | G0:0044422 | <1e-4 | slr7097  | G0:0006396 | 0.0137 |
| sll10412 | G0:0044248 | <1e-4 | sll17034 | G0:0043549 | <1e-4 | slr0912  | G0:0022832 | <1e-4 | sll11006 | G0:0044444 | <1e-4 | slr1178  | G0:0006396 | 0.0137 |
| sll11832 | G0:0072527 | <1e-4 | ssr2333  | G0:0042451 | <1e-4 | slr1505  | G0:0015405 | <1e-4 | ssr2333  | G0:0044444 | <1e-4 | ss10750  | G0:0016772 | 0.0137 |
| slr0769  | G0:0071841 | <1e-4 | sll11340 | G0:0034654 | <1e-4 | slr1383  | G0:0022857 | <1e-4 | sll18007 | G0:0043226 | <1e-4 | slr1812  | G0:0016740 | 0.0136 |
| sll11527 | G0:0071841 | <1e-4 | sll11769 | G0:0019752 | <1e-4 | slr1601  | G0:0022892 | <1e-4 | slr0459  | G0:0044425 | <1e-4 | sll10413 | G0:0016740 | 0.0136 |
| sll11060 | G0:0009893 | <1e-4 | sll10445 | G0:0044260 | <1e-4 | slr0232  | G0:0022832 | <1e-4 | slr2038  | G0:0044425 | <1e-4 | slr1811  | G0:0016874 | 0.0135 |
| sll11381 | G0:0050801 | <1e-4 | slr1152  | G0:0071841 | <1e-4 | slr0076  | G0:0043492 | <1e-4 | slr0058  | G0:0005575 | <1e-4 | slr0978  | G0:0016874 | 0.0135 |
| slr1611  | G0:0046164 | <1e-4 | slr5012  | G0:0046394 | <1e-4 | sll17031 | G0:0060089 | <1e-4 | slr0103  | G0:0044424 | <1e-4 | slr1098  | G0:0016874 | 0.0135 |
| sll17031 | G0:0009262 | <1e-4 | slr0294  | G0:0009893 | <1e-4 | slr1398  | G0:0022892 | <1e-4 | ss11417  | G0:0044422 | <1e-4 | slr1851  | G0:0016874 | 0.0135 |

|          |            |       |          |            |       |          |            |       |          |            |       |          |            |        |
|----------|------------|-------|----------|------------|-------|----------|------------|-------|----------|------------|-------|----------|------------|--------|
| sl110156 | G0:0055086 | <1e-4 | slr1338  | G0:0071841 | <1e-4 | ss15095  | G0:0043167 | <1e-4 | slr1394  | G0:0044464 | <1e-4 | slr0909  | G0:0016874 | 0.0135 |
| slr0937  | G0:0044271 | <1e-4 | slr1628  | G0:0019637 | <1e-4 | sl110282 | G0:0022838 | <1e-4 | slr1161  | G0:0005575 | <1e-4 | slr1767  | G0:0016874 | 0.0135 |
| sl111054 | G0:0071841 | <1e-4 | sl111193 | G0:0022607 | <1e-4 | sl111882 | G0:0005342 | <1e-4 | sl11609  | G0:0044424 | <1e-4 | sl110361 | G0:0016874 | 0.0135 |
| sl110327 | G0:0043436 | <1e-4 | slr2010  | G0:0009165 | <1e-4 | sl111123 | G0:0060089 | <1e-4 | sl110446 | G0:0043226 | <1e-4 | sl110910 | G0:0016874 | 0.0135 |
| sl110443 | G0:0042180 | <1e-4 | sl111571 | G0:0009142 | <1e-4 | sl110497 | G0:0015293 | <1e-4 | sl111562 | G0:0043226 | <1e-4 | slr0589  | G0:0016874 | 0.0135 |
| slr0554  | G0:0009117 | <1e-4 | slr0169  | G0:0043648 | <1e-4 | sl111862 | G0:0016818 | <1e-4 | sl111488 | G0:0044444 | <1e-4 | slr1800  | G0:0016874 | 0.0135 |
| slr0303  | G0:0050801 | <1e-4 | sl111562 | G0:0009892 | <1e-4 | sl110168 | G0:0022890 | <1e-4 | sl110451 | G0:0005575 | <1e-4 | slr0263  | G0:0016874 | 0.0135 |
| slr1866  | G0:0050794 | <1e-4 | sl117066 | G0:0044106 | <1e-4 | slr1790  | G0:0015267 | <1e-4 | sl110174 | G0:0044446 | <1e-4 | sl110414 | G0:0019538 | 0.0133 |
| sl111769 | G0:0009142 | <1e-4 | slr1851  | G0:0044271 | <1e-4 | sl110763 | G0:0015399 | <1e-4 | slr0272  | G0:0044422 | <1e-4 | slr0872  | G0:0019538 | 0.0133 |
| slr7100  | G0:0051186 | <1e-4 | sl110623 | G0:0060255 | <1e-4 | sl110615 | G0:0022836 | <1e-4 | slr2018  | G0:0005575 | <1e-4 | sl111632 | G0:0019538 | 0.0133 |
| sl110751 | G0:0044260 | <1e-4 | ssr2060  | G0:0034654 | <1e-4 | sl111021 | G0:0022890 | <1e-4 | sl111109 | G0:0005575 | <1e-4 | slr1618  | G0:0019538 | 0.0133 |
| slr1275  | G0:0044275 | <1e-4 | ssr6002  | G0:0044003 | <1e-4 | sl110176 | G0:0016746 | <1e-4 | slr8014  | G0:0044422 | <1e-4 | ssr3571  | G0:0019538 | 0.0133 |
| slr1391  | G0:0051716 | <1e-4 | sl118040 | G0:0052188 | <1e-4 | slr1210  | G0:0042623 | <1e-4 | sl111446 | G0:0044424 | <1e-4 | ssr2551  | G0:0019538 | 0.0133 |
| sl110751 | G0:0009893 | <1e-4 | slr6051  | G0:0072527 | <1e-4 | slr1544  | G0:0016462 | <1e-4 | ss13451  | G0:0044464 | <1e-4 | sl110198 | G0:0019538 | 0.0133 |
| slr0625  | G0:0050801 | <1e-4 | slr1957  | G0:0031323 | <1e-4 | slr6090  | G0:0008171 | <1e-4 | sl111681 | G0:0043226 | <1e-4 | sl110237 | G0:0019538 | 0.0133 |
| sl111004 | G0:0009987 | <1e-4 | slr0509  | G0:0052188 | <1e-4 | ssr3129  | G0:0022832 | <1e-4 | ssr7017  | G0:0044446 | <1e-4 | slr2073  | G0:0019538 | 0.0133 |
| sl110168 | G0:0042180 | <1e-4 | sl110369 | G0:0008150 | <1e-4 | sl111174 | G0:0043167 | <1e-4 | sl110157 | G0:0005575 | <1e-4 | ssr2439  | G0:0019538 | 0.0133 |
| ssr2318  | G0:0006066 | <1e-4 | slr1778  | G0:0010468 | <1e-4 | ssr6030  | G0:0016817 | <1e-4 | sl110031 | G0:0044424 | <1e-4 | slr0913  | G0:0019538 | 0.0133 |
| slr1222  | G0:0019362 | <1e-4 | slr1547  | G0:0071840 | <1e-4 | ss10738  | G0:0060089 | <1e-4 | sl110189 | G0:0044422 | <1e-4 | slr1073  | G0:0019538 | 0.0133 |
| sl111486 | G0:0080090 | <1e-4 | ssr5106  | G0:0044260 | <1e-4 | sl111891 | G0:0022838 | <1e-4 | sl115026 | G0:0005575 | <1e-4 | slr1676  | G0:0019538 | 0.0133 |
| slr0930  | G0:0009987 | <1e-4 | ssr6089  | G0:0009132 | <1e-4 | slr0907  | G0:0022857 | <1e-4 | slr1814  | G0:0044446 | <1e-4 | slr2011  | G0:0019538 | 0.0133 |
| slr7083  | G0:0009126 | <1e-4 | sl111304 | G0:0009262 | <1e-4 | slr2119  | G0:0015293 | <1e-4 | slr0773  | G0:0044425 | <1e-4 | slr1230  | G0:0019538 | 0.0133 |
| sl110564 | G0:0016052 | <1e-4 | sl110847 | G0:0009987 | <1e-4 | slr1601  | G0:0022857 | <1e-4 | slr8021  | G0:0044446 | <1e-4 | slr0668  | G0:0019538 | 0.0133 |
| sl111355 | G0:0044260 | <1e-4 | slr6063  | G0:0072527 | <1e-4 | sl111582 | G0:0015291 | <1e-4 | slr1079  | G0:0043226 | <1e-4 | slr1436  | G0:0019538 | 0.0133 |
| sl111775 | G0:0051818 | <1e-4 | ssr3129  | G0:0042180 | <1e-4 | slr1920  | G0:0043492 | <1e-4 | ss11464  | G0:0005575 | <1e-4 | sl111949 | G0:0019538 | 0.0133 |
| sl110756 | G0:0042180 | <1e-4 | sl110372 | G0:0009165 | <1e-4 | slr0476  | G0:0022836 | <1e-4 | sl111390 | G0:0044425 | <1e-4 | ssr2615  | G0:0019538 | 0.0133 |
| sl110846 | G0:0009059 | <1e-4 | slr0914  | G0:0051179 | <1e-4 | ss10787  | G0:0015293 | <1e-4 | sl111485 | G0:0044464 | <1e-4 | sl110325 | G0:0019538 | 0.0133 |
| slr0655  | G0:0072528 | <1e-4 | slr0480  | G0:0009259 | <1e-4 | slr1935  | G0:0015077 | <1e-4 | sl110282 | G0:0044444 | <1e-4 | slr1573  | G0:0019538 | 0.0133 |
| slr1907  | G0:0044283 | <1e-4 | slr0845  | G0:0080090 | <1e-4 | slr0579  | G0:0015293 | <1e-4 | sl111658 | G0:0005575 | <1e-4 | sl111656 | G0:0019538 | 0.0133 |
| sl110996 | G0:0009124 | <1e-4 | slr1590  | G0:0044260 | <1e-4 | slr1338  | G0:0015405 | <1e-4 | sl111006 | G0:0043226 | <1e-4 | slr1177  | G0:0019538 | 0.0133 |
| sl110482 | G0:0048518 | <1e-4 | sl110296 | G0:0006631 | <1e-4 | slr1726  | G0:0022890 | <1e-4 | slr1474  | G0:0044422 | <1e-4 | slr0360  | G0:0019538 | 0.0133 |
| ss16061  | G0:0034654 | <1e-4 | sl111630 | G0:0071496 | <1e-4 | sl111109 | G0:0022892 | <1e-4 | sl110238 | G0:0005575 | <1e-4 | ssr1765  | G0:0019538 | 0.0133 |
| slr5023  | G0:0055114 | <1e-4 | sl111586 | G0:0055114 | <1e-4 | sl110252 | G0:0016818 | <1e-4 | sl110253 | G0:0044424 | <1e-4 | slr0364  | G0:0019538 | 0.0133 |
| sl110588 | G0:0006753 | <1e-4 | ss12064  | G0:0006733 | <1e-4 | sl111512 | G0:0060089 | <1e-4 | sl110932 | G0:0005575 | <1e-4 | slr0404  | G0:0019538 | 0.0133 |
| ssr7035  | G0:0055086 | <1e-4 | slr7037  | G0:0009165 | <1e-4 | slr1383  | G0:0022890 | <1e-4 | slr7025  | G0:0044422 | <1e-4 | slr0006  | G0:0019538 | 0.0133 |
| slr0142  | G0:0071840 | <1e-4 | sl111505 | G0:0006721 | <1e-4 | slr1865  | G0:0016462 | <1e-4 | slr1117  | G0:0044424 | <1e-4 | slr0386  | G0:0019538 | 0.0133 |
| ss17039  | G0:0072528 | <1e-4 | slr1266  | G0:0048518 | <1e-4 | slr1287  | G0:0003674 | <1e-4 | sl110062 | G0:0044425 | <1e-4 | sl111262 | G0:0019538 | 0.0133 |
| slr0147  | G0:0009123 | <1e-4 | sl111068 | G0:0044282 | <1e-4 | slr1450  | G0:0022891 | <1e-4 | slr1812  | G0:0044425 | <1e-4 | slr0204  | G0:0019538 | 0.0133 |
| slr1854  | G0:0009117 | <1e-4 | slr0392  | G0:0051347 | <1e-4 | sl110802 | G0:0043492 | <1e-4 | slr0587  | G0:0044446 | <1e-4 | sl110355 | G0:0019538 | 0.0133 |
| sl111880 | G0:0060255 | <1e-4 | sl110394 | G0:0009260 | <1e-4 | slr0890  | G0:0022857 | <1e-4 | slr6009  | G0:0005575 | <1e-4 | sl111761 | G0:0019538 | 0.0133 |
| slr2084  | G0:0009259 | <1e-4 | slr1940  | G0:0044271 | <1e-4 | slr1657  | G0:0015267 | <1e-4 | slr1270  | G0:0005575 | <1e-4 | slr1638  | G0:0019538 | 0.0133 |
| slr1613  | G0:0051347 | <1e-4 | slr1926  | G0:0044260 | <1e-4 | slr0959  | G0:0016741 | <1e-4 | sl111531 | G0:0005575 | <1e-4 | sl110066 | G0:0019538 | 0.0133 |
| slr8021  | G0:0072521 | <1e-4 | ssr6020  | G0:0009132 | <1e-4 | sl110445 | G0:0022803 | <1e-4 | slr6080  | G0:0044424 | <1e-4 | slr1084  | G0:0019538 | 0.0133 |
| sl110216 | G0:0016054 | <1e-4 | sl111509 | G0:0008150 | <1e-4 | ss15096  | G0:0016741 | <1e-4 | sl110442 | G0:0044444 | <1e-4 | sl110871 | G0:0006396 | 0.0132 |
| ss18039  | G0:0044282 | <1e-4 | ssr6030  | G0:0001932 | <1e-4 | slr2000  | G0:0015291 | <1e-4 | slr0351  | G0:0044425 | <1e-4 | slr2005  | G0:0006396 | 0.0132 |
| ssr6099  | G0:0009263 | <1e-4 | slr5102  | G0:0006766 | <1e-4 | slr0482  | G0:0022892 | <1e-4 | sl110098 | G0:0044446 | <1e-4 | slr1074  | G0:0006396 | 0.0132 |
| slr0967  | G0:0034654 | <1e-4 | sl111411 | G0:0048518 | <1e-4 | sl118033 | G0:0015293 | <1e-4 | sl111089 | G0:0005575 | <1e-4 | sl110614 | G0:0006396 | 0.0132 |
| slr7096  | G0:0006733 | <1e-4 | ss11577  | G0:0055086 | <1e-4 | slr7101  | G0:0005342 | <1e-4 | slr0587  | G0:0005575 | <1e-4 | slr1383  | G0:0006396 | 0.0132 |
| slr1189  | G0:0080090 | <1e-4 | sl110787 | G0:0019222 | <1e-4 | slr0112  | G0:0022832 | <1e-4 | sl111344 | G0:0044422 | <1e-4 | sl110268 | G0:0006396 | 0.0132 |
| slr0975  | G0:0050801 | <1e-4 | slr2011  | G0:0060255 | <1e-4 | sl111737 | G0:0022832 | <1e-4 | sl110423 | G0:0044446 | <1e-4 | slr1209  | G0:0006396 | 0.0132 |
| slr1287  | G0:0048522 | <1e-4 | sl118012 | G0:0044283 | <1e-4 | sl110265 | G0:0022857 | <1e-4 | sl110238 | G0:0044425 | <1e-4 | sl110669 | G0:0006396 | 0.0132 |
| slr0207  | G0:0071554 | <1e-4 | sl111174 | G0:0051246 | <1e-4 | slr0151  | G0:0015267 | <1e-4 | slr0076  | G0:0005575 | <1e-4 | slr0172  | G0:0006396 | 0.0132 |
| sl110864 | G0:0006576 | <1e-4 | sl110780 | G0:0009141 | <1e-4 | sl111318 | G0:0015075 | <1e-4 | slr0169  | G0:0044424 | <1e-4 | sl110319 | G0:0006396 | 0.0132 |
| sl111052 | G0:0065007 | <1e-4 | slr0695  | G0:0019222 | <1e-4 | sl111757 | G0:0015405 | <1e-4 | slr1056  | G0:0044444 | <1e-4 | slr2080  | G0:0006396 | 0.0132 |

s111217 G0:0055086 <1e-4 s110547 G0:0009889 <1e-4 s111726 G0:0008171 <1e-4 slr0852 G0:0044422 <1e-4 slr1852 G0:0006396 0.0132  
s111866 G0:0009057 <1e-4 s110335 G0:0009259 <1e-4 s111401 G0:0003674 <1e-4 s110095 G0:0044425 <1e-4 slr0053 G0:0006396 0.0132  
slr1470 G0:0043436 <1e-4 slr1790 G0:0009123 <1e-4 ss12595 G0:0043167 <1e-4 slr1896 G0:0044464 <1e-4 s111390 G0:0006396 0.0132  
s110188 G0:0009991 <1e-4 ssl1972 G0:0019752 <1e-4 slr1614 G0:0016818 <1e-4 s115128 G0:0044446 <1e-4 slr0358 G0:0006396 0.0132  
slr2119 G0:0051818 <1e-4 slr1913 G0:0050801 <1e-4 s110995 G0:0005342 <1e-4 s111053 G0:0044424 <1e-4 slr0272 G0:0006396 0.0132  
slr1807 G0:0044248 <1e-4 slr1215 G0:0051179 <1e-4 slr1603 G0:0008171 <1e-4 s118027 G0:0005575 <1e-4 s111634 G0:0006396 0.0132  
slr0345 G0:0022411 <1e-4 ssl0294 G0:0006721 <1e-4 slr2003 G0:0022838 <1e-4 ss10787 G0:0044446 <1e-4 slr0975 G0:0006396 0.0132  
s110822 G0:0071841 <1e-4 slr0271 G0:0009262 <1e-4 slr1915 G0:0015291 <1e-4 s110294 G0:0044446 <1e-4 slr0060 G0:0006396 0.0132  
ssr3410 G0:0006066 <1e-4 slr1647 G0:0009123 <1e-4 s111340 G0:0042623 <1e-4 ssr6024 G0:0005575 <1e-4 s110539 G0:0006396 0.0132  
s111388 G0:0072521 <1e-4 slr1658 G0:0051716 <1e-4 s111510 G0:0022838 <1e-4 s110858 G0:0044425 <1e-4 slr1415 G0:0006396 0.0132  
s111504 G0:0055114 <1e-4 slr0407 G0:0046483 <1e-4 slr6033 G0:0016746 <1e-4 ssr5074 G0:0044464 <1e-4 slr1152 G0:0006396 0.0132  
slr1704 G0:0043648 <1e-4 slr0848 G0:0006082 <1e-4 slr1188 G0:0015293 <1e-4 slr1095 G0:0044425 <1e-4 slr0104 G0:0006396 0.0132  
s110984 G0:0009889 <1e-4 ssl1378 G0:0019752 <1e-4 ss13382 G0:0016818 <1e-4 slr1935 G0:0044444 <1e-4 ss10467 G0:0042626 0.0132  
s110062 G0:0044275 <1e-4 ssr1155 G0:0044248 <1e-4 slr1702 G0:0015291 <1e-4 s110678 G0:0044446 <1e-4 s111476 G0:0042626 0.0132  
slr0582 G0:0009893 <1e-4 slr0869 G0:0034641 <1e-4 slr1599 G0:0005342 <1e-4 s110839 G0:0044425 <1e-4 slr1577 G0:0042626 0.0132  
s111765 G0:0050801 <1e-4 ssr6026 G0:0008150 <1e-4 s111164 G0:0022891 <1e-4 slr0455 G0:0005575 <1e-4 ss12162 G0:0042626 0.0132  
slr1944 G0:0009161 <1e-4 s110787 G0:0009150 <1e-4 s110309 G0:0060089 <1e-4 ss12814 G0:0005575 <1e-4 slr0816 G0:0042626 0.0132  
s110183 G0:0009262 <1e-4 slr1541 G0:0006721 <1e-4 s110103 G0:0060089 <1e-4 s117090 G0:0044424 <1e-4 slr1628 G0:0042626 0.0132  
s110208 G0:0044260 <1e-4 ssl3692 G0:0006163 <1e-4 slr1353 G0:0022892 <1e-4 s111130 G0:0044464 <1e-4 ssr6002 G0:0042626 0.0132  
slr0937 G0:0034641 <1e-4 s110775 G0:0080090 <1e-4 ssr0536 G0:0022836 <1e-4 s111092 G0:0005575 <1e-4 s110552 G0:0042626 0.0132  
slr1591 G0:0072528 <1e-4 ssl2595 G0:0008150 <1e-4 slr6028 G0:0015077 <1e-4 slr2046 G0:0044422 <1e-4 ssr2975 G0:0042626 0.0132  
slr0919 G0:0050801 <1e-4 s115034 G0:0009889 <1e-4 s110294 G0:0016818 <1e-4 slr2004 G0:0005575 <1e-4 ssr0109 G0:0042626 0.0132  
slr2110 G0:0055086 <1e-4 ssr0759 G0:0031323 <1e-4 s110505 G0:0015293 <1e-4 slr0453 G0:0005575 <1e-4 s110160 G0:0042626 0.0132  
ssr2843 G0:0010556 <1e-4 slr1819 G0:0006163 <1e-4 slr2010 G0:0015405 <1e-4 ssr1558 G0:0005575 <1e-4 slr1173 G0:0042626 0.0132  
slr0059 G0:0008610 <1e-4 slr0582 G0:0072522 <1e-4 slr5023 G0:0016462 <1e-4 slr0262 G0:0005575 <1e-4 s112011 G0:0042626 0.0132  
slr1260 G0:0006720 <1e-4 slr0935 G0:0009987 <1e-4 slr1619 G0:0015399 <1e-4 slr0304 G0:0044444 <1e-4 s115132 G0:0042626 0.0132  
s111071 G0:0051234 <1e-4 slr0610 G0:0009059 <1e-4 slr6044 G0:0008171 <1e-4 slr0498 G0:0044422 <1e-4 s111570 G0:0042626 0.0132  
ssr6085 G0:0034660 <1e-4 slr6044 G0:0051186 <1e-4 slr0740 G0:0043492 <1e-4 slr2027 G0:0043226 <1e-4 slr0645 G0:0042626 0.0132  
slr7037 G0:0044275 <1e-4 slr1737 G0:0072524 <1e-4 s110846 G0:0015267 <1e-4 ss12148 G0:0044446 <1e-4 ssr2060 G0:0042626 0.0132  
slr0503 G0:0009262 <1e-4 slr6066 G0:0055086 <1e-4 slr0211 G0:0016817 <1e-4 s111163 G0:0005575 <1e-4 slr0334 G0:0042626 0.0132  
ssr1391 G0:0080090 <1e-4 ssl2807 G0:0022411 <1e-4 slr0318 G0:0043167 <1e-4 slr0109 G0:0044422 <1e-4 ssr2553 G0:0042626 0.0132  
slr0579 G0:0050896 <1e-4 s111106 G0:0044281 <1e-4 slr0510 G0:0016741 <1e-4 s118011 G0:0044444 <1e-4 slr0285 G0:0042626 0.0132  
slr0217 G0:0042451 <1e-4 s110608 G0:0080090 <1e-4 s111632 G0:0043167 <1e-4 slr0912 G0:0044424 <1e-4 slr6091 G0:0042626 0.0132  
slr0358 G0:0055086 <1e-4 s111240 G0:0006576 <1e-4 slr0468 G0:0022892 <1e-4 s111946 G0:0005575 <1e-4 slr8021 G0:0042626 0.0132  
slr1098 G0:0044282 <1e-4 slr0058 G0:0051188 <1e-4 s115033 G0:0022892 <1e-4 s110098 G0:0005575 <1e-4 ssr8013 G0:0042626 0.0132  
ssl7042 G0:0009056 <1e-4 s111378 G0:0006163 <1e-4 s110010 G0:0060089 <1e-4 slr1827 G0:0005575 <1e-4 s115003 G0:0042626 0.0132  
slr1886 G0:0009987 <1e-4 s111372 G0:0006576 <1e-4 ss11498 G0:0022892 <1e-4 s110172 G0:0044446 <1e-4 ss17045 G0:0042626 0.0132  
s111131 G0:0055082 <1e-4 slr6047 G0:0031640 <1e-4 slr1327 G0:0015405 <1e-4 slr0392 G0:0044422 <1e-4 slr0651 G0:0042626 0.0132  
s110886 G0:0006631 <1e-4 slr0919 G0:0019751 <1e-4 ss11464 G0:0022803 <1e-4 slr1206 G0:0044425 <1e-4 s111142 G0:0042626 0.0132  
ss13142 G0:0051179 <1e-4 ssr2422 G0:0031326 <1e-4 s110793 G0:0022803 <1e-4 s110479 G0:0043226 <1e-4 slr0325 G0:0042626 0.0132  
slr1927 G0:0009059 <1e-4 slr1307 G0:0009889 <1e-4 ssr6048 G0:0005342 <1e-4 slr1990 G0:0043226 <1e-4 slr1780 G0:0042626 0.0132  
ssr2009 G0:0043412 <1e-4 slr6049 G0:0019219 <1e-4 slr6033 G0:0016741 <1e-4 slr0885 G0:0044444 <1e-4 ssr6024 G0:0042626 0.0132  
s110360 G0:0031326 <1e-4 slr1303 G0:0080090 <1e-4 slr1944 G0:0005342 <1e-4 slr0064 G0:0044446 <1e-4 slr0521 G0:0042626 0.0132  
s117069 G0:0044260 <1e-4 s110553 G0:0033013 <1e-4 s110243 G0:0015293 <1e-4 s111486 G0:0043226 <1e-4 slr1507 G0:0042626 0.0132  
slr0924 G0:0009123 <1e-4 slr0712 G0:0051179 <1e-4 s111562 G0:0022891 <1e-4 slr1619 G0:0044425 <1e-4 slr0509 G0:0042626 0.0132  
s110382 G0:0044275 <1e-4 slr1537 G0:0008150 <1e-4 s111638 G0:0015077 <1e-4 s111191 G0:0005575 <1e-4 s111882 G0:0042626 0.0132  
slr0109 G0:0044281 <1e-4 s110497 G0:0005996 <1e-4 s110843 G0:0022836 <1e-4 s111606 G0:0044424 <1e-4 ss12971 G0:0042626 0.0132  
s111965 G0:0008150 <1e-4 slr1074 G0:0009165 <1e-4 ss10312 G0:0022803 <1e-4 s111158 G0:0043226 <1e-4 slr2012 G0:0042626 0.0132  
slr0305 G0:0005996 <1e-4 slr1780 G0:0046164 <1e-4 s110282 G0:0005342 <1e-4 slr1230 G0:0044425 <1e-4 slr7071 G0:0042626 0.0132  
ss17039 G0:0072521 <1e-4 slr5013 G0:0009987 <1e-4 slr0552 G0:0022891 <1e-4 ss15095 G0:0005575 <1e-4 ssr1473 G0:0042626 0.0132  
s110861 G0:0044271 <1e-4 slr0978 G0:0006066 <1e-4 ss12471 G0:0015293 <1e-4 s111880 G0:0044446 <1e-4 ssr7035 G0:0042626 0.0132  
slr1813 G0:0009059 <1e-4 ssr2972 G0:0044106 <1e-4 slr1827 G0:0015293 <1e-4 slr1327 G0:0044444 <1e-4 slr0039 G0:0042626 0.0132  
ssr1258 G0:0006766 <1e-4 s110216 G0:0050896 <1e-4 s110242 G0:0016741 <1e-4 slr1659 G0:0044422 <1e-4 slr1819 G0:0042626 0.0132  
slr1647 G0:0044255 <1e-4 slr1275 G0:0009259 <1e-4 s115128 G0:0042623 <1e-4 ssr3341 G0:0044444 <1e-4 slr7094 G0:0042626 0.0132

|         |            |       |         |            |       |         |            |       |         |            |       |         |            |        |
|---------|------------|-------|---------|------------|-------|---------|------------|-------|---------|------------|-------|---------|------------|--------|
| sl15030 | G0:0006066 | <1e-4 | ssl2807 | G0:0009056 | <1e-4 | slr1657 | G0:0016746 | <1e-4 | sl15130 | G0:0044424 | <1e-4 | ss15103 | G0:0042626 | 0.0132 |
| slr6071 | G0:0009263 | <1e-4 | sl10996 | G0:0022607 | <1e-4 | slr1444 | G0:0016818 | <1e-4 | sl10606 | G0:0044444 | <1e-4 | sl11373 | G0:0042626 | 0.0132 |
| slr1223 | G0:0050794 | <1e-4 | ssr3571 | G0:0006753 | <1e-4 | sl10335 | G0:0043492 | <1e-4 | slr1535 | G0:0044425 | <1e-4 | slr0667 | G0:0042626 | 0.0132 |
| slr6081 | G0:0031323 | <1e-4 | ssr2615 | G0:0009893 | <1e-4 | slr0582 | G0:0015405 | <1e-4 | slr1082 | G0:0044422 | <1e-4 | slr7091 | G0:0042626 | 0.0132 |
| sl17087 | G0:0006753 | <1e-4 | slr1616 | G0:0071496 | <1e-4 | ssl1046 | G0:0022803 | <1e-4 | sl10827 | G0:0044425 | <1e-4 | sl10765 | G0:0042626 | 0.0132 |
| sl11188 | G0:0009987 | <1e-4 | slr5012 | G0:0009124 | <1e-4 | slr0695 | G0:0042623 | <1e-4 | slr0598 | G0:0005575 | <1e-4 | slr0588 | G0:0042626 | 0.0132 |
| sl10532 | G0:0072522 | <1e-4 | slr1647 | G0:0006066 | <1e-4 | slr6067 | G0:0015399 | <1e-4 | slr1142 | G0:0043226 | <1e-4 | slr0459 | G0:0042626 | 0.0132 |
| ssr2972 | G0:0072522 | <1e-4 | ssr1499 | G0:0045184 | <1e-4 | sl10658 | G0:0022836 | <1e-4 | slr0924 | G0:0044425 | <1e-4 | ssr7079 | G0:0042626 | 0.0132 |
| sl11609 | G0:0006220 | <1e-4 | slr1690 | G0:0050794 | <1e-4 | slr2011 | G0:0015405 | <1e-4 | ssr2060 | G0:0044444 | <1e-4 | sl11532 | G0:0042626 | 0.0132 |
| slr0392 | G0:0009132 | <1e-4 | ssr3189 | G0:0006766 | <1e-4 | ssr5121 | G0:0016746 | <1e-4 | slr0602 | G0:0044424 | <1e-4 | sl10847 | G0:0042626 | 0.0132 |
| sl10181 | G0:0042455 | <1e-4 | sl11915 | G0:0034654 | <1e-4 | sl10735 | G0:0015399 | <1e-4 | ssr6027 | G0:0043226 | <1e-4 | sl11464 | G0:0042626 | 0.0132 |
| slr8044 | G0:0006811 | <1e-4 | sl10860 | G0:0009059 | <1e-4 | sl10160 | G0:0015293 | <1e-4 | sl10031 | G0:0044464 | <1e-4 | sl11486 | G0:0042626 | 0.0132 |
| slr0364 | G0:0046907 | <1e-4 | slr1045 | G0:0051818 | <1e-4 | slr1657 | G0:0022803 | <1e-4 | sl11736 | G0:0043226 | <1e-4 | sl11785 | G0:0042626 | 0.0132 |
| sl11447 | G0:0006732 | <1e-4 | ssl3615 | G0:0080090 | <1e-4 | sl11738 | G0:0016818 | <1e-4 | slr0355 | G0:0044444 | <1e-4 | ssr2802 | G0:0042626 | 0.0132 |
| sl10596 | G0:0071496 | <1e-4 | slr0376 | G0:0044255 | <1e-4 | sl11135 | G0:0015405 | <1e-4 | sl18035 | G0:0005575 | <1e-4 | sl11915 | G0:0042626 | 0.0132 |
| ssr7072 | G0:0019222 | <1e-4 | slr1918 | G0:0055114 | <1e-4 | sl11749 | G0:0060089 | <1e-4 | slr2018 | G0:0044446 | <1e-4 | slr6045 | G0:0042626 | 0.0132 |
| ssr6083 | G0:0006720 | <1e-4 | sl10756 | G0:0006720 | <1e-4 | sl18035 | G0:0016462 | <1e-4 | ss15091 | G0:0044424 | <1e-4 | sl16055 | G0:0042626 | 0.0132 |
| ssr2439 | G0:0051818 | <1e-4 | slr1378 | G0:0044260 | <1e-4 | sl11884 | G0:0016817 | <1e-4 | sl10749 | G0:0044446 | <1e-4 | slr0082 | G0:0042626 | 0.0132 |
| sl10615 | G0:0022411 | <1e-4 | slr0172 | G0:0031640 | <1e-4 | sl10508 | G0:0005342 | <1e-4 | slr8044 | G0:0044444 | <1e-4 | sl18035 | G0:0042626 | 0.0132 |
| ssl1255 | G0:0009126 | <1e-4 | slr1070 | G0:0045184 | <1e-4 | sl10997 | G0:0022892 | <1e-4 | sl11660 | G0:0005575 | <1e-4 | sl11573 | G0:0042626 | 0.0132 |
| sl10735 | G0:0019752 | <1e-4 | sl10656 | G0:0006732 | <1e-4 | slr1612 | G0:0060089 | <1e-4 | sl10493 | G0:0044425 | <1e-4 | ss11552 | G0:0042626 | 0.0132 |
| sl10355 | G0:0008150 | <1e-4 | slr1886 | G0:0009141 | <1e-4 | slr1449 | G0:0022857 | <1e-4 | sl10141 | G0:0044425 | <1e-4 | slr0397 | G0:0042626 | 0.0132 |
| sl11477 | G0:0051234 | <1e-4 | slr0521 | G0:0043412 | <1e-4 | slr0184 | G0:0016462 | <1e-4 | sl11092 | G0:0044446 | <1e-4 | ss16092 | G0:0042626 | 0.0132 |
| ss12420 | G0:0006753 | <1e-4 | slr1101 | G0:0006793 | <1e-4 | slr6091 | G0:0022892 | <1e-4 | sl10815 | G0:0044446 | <1e-4 | slr0184 | G0:0042626 | 0.0132 |
| sl11702 | G0:0050801 | <1e-4 | slr1362 | G0:0055082 | <1e-4 | sl17070 | G0:0022836 | <1e-4 | sl10898 | G0:0044425 | <1e-4 | slr1449 | G0:0042626 | 0.0132 |
| sl11504 | G0:0006066 | <1e-4 | slr1025 | G0:0044003 | <1e-4 | ssr0692 | G0:0022803 | <1e-4 | slr5024 | G0:0044464 | <1e-4 | sl10670 | G0:0042626 | 0.0132 |
| sl10428 | G0:0048519 | <1e-4 | ssr3341 | G0:0043170 | <1e-4 | sl10505 | G0:0016817 | <1e-4 | sl11766 | G0:0044424 | <1e-4 | slr1681 | G0:0042626 | 0.0132 |
| sl11528 | G0:0044003 | <1e-4 | sl10268 | G0:0009150 | <1e-4 | slr6029 | G0:0022891 | <1e-4 | slr5112 | G0:0044464 | <1e-4 | slr0712 | G0:0042626 | 0.0132 |
| sl11858 | G0:0018130 | <1e-4 | ssr6020 | G0:0008610 | <1e-4 | ssr5020 | G0:0016818 | <1e-4 | slr0334 | G0:0005575 | <1e-4 | sl10376 | G0:0042626 | 0.0132 |
| sl10424 | G0:0009987 | <1e-4 | sl11355 | G0:0010468 | <1e-4 | slr1546 | G0:0022890 | <1e-4 | slr1875 | G0:0043226 | <1e-4 | slr6075 | G0:0042626 | 0.0132 |
| slr6009 | G0:0031323 | <1e-4 | sl11472 | G0:0051186 | <1e-4 | sl10071 | G0:0015075 | <1e-4 | slr1288 | G0:0044446 | <1e-4 | sl10678 | G0:0042626 | 0.0132 |
| slr1162 | G0:0006753 | <1e-4 | slr1261 | G0:0043170 | <1e-4 | sl11586 | G0:0022890 | <1e-4 | sl15089 | G0:0005575 | <1e-4 | ssr3467 | G0:0042626 | 0.0132 |
| sl11389 | G0:0050896 | <1e-4 | slr5077 | G0:0051347 | <1e-4 | sl11350 | G0:0015291 | <1e-4 | slr0217 | G0:0043226 | <1e-4 | slr6016 | G0:0042626 | 0.0132 |
| slr0581 | G0:0001932 | <1e-4 | slr1396 | G0:0009889 | <1e-4 | sl17033 | G0:0015293 | <1e-4 | sl11785 | G0:0044446 | <1e-4 | slr0863 | G0:0042626 | 0.0132 |
| slr6071 | G0:0051188 | <1e-4 | ssl5031 | G0:0071496 | <1e-4 | sl10321 | G0:0015293 | <1e-4 | slr5053 | G0:0044422 | <1e-4 | sl15028 | G0:0042626 | 0.0132 |
| slr0667 | G0:0022607 | <1e-4 | ssl1690 | G0:0071841 | <1e-4 | sl10810 | G0:0043167 | <1e-4 | slr1814 | G0:0005575 | <1e-4 | slr2071 | G0:0042626 | 0.0132 |
| sl15006 | G0:0009117 | <1e-4 | sl11233 | G0:0042451 | <1e-4 | slr7082 | G0:0060089 | <1e-4 | slr1122 | G0:0044422 | <1e-4 | ss15015 | G0:0042626 | 0.0132 |
| slr5053 | G0:0042180 | <1e-4 | slr0872 | G0:0006082 | <1e-4 | slr5024 | G0:0043167 | <1e-4 | sl10641 | G0:0044425 | <1e-4 | ssr2998 | G0:0042626 | 0.0132 |
| slr1442 | G0:0019222 | <1e-4 | ssl7042 | G0:0048878 | <1e-4 | slr1568 | G0:0003674 | <1e-4 | sl10997 | G0:0044464 | <1e-4 | slr0637 | G0:0042626 | 0.0132 |
| slr0366 | G0:0009126 | <1e-4 | slr1240 | G0:0006576 | <1e-4 | sl11511 | G0:0022838 | <1e-4 | ss17045 | G0:0044424 | <1e-4 | sl10031 | G0:0042626 | 0.0132 |
| sl11749 | G0:0051818 | <1e-4 | sl11651 | G0:0019752 | <1e-4 | sl10096 | G0:0016741 | <1e-4 | sl17043 | G0:0043226 | <1e-4 | sl10294 | G0:0042626 | 0.0132 |
| slr0712 | G0:0072524 | <1e-4 | slr1752 | G0:0018130 | <1e-4 | slr1956 | G0:0022891 | <1e-4 | ssr3571 | G0:0044425 | <1e-4 | slr1601 | G0:0042626 | 0.0132 |
| sl11106 | G0:0042455 | <1e-4 | slr0964 | G0:0071554 | <1e-4 | sl10606 | G0:0015399 | <1e-4 | slr0552 | G0:0044464 | <1e-4 | slr0730 | G0:0042626 | 0.0132 |
| slr1572 | G0:0006066 | <1e-4 | ssr8013 | G0:0090304 | <1e-4 | ssl3549 | G0:0022890 | <1e-4 | slr0326 | G0:0044444 | <1e-4 | ss17021 | G0:0042626 | 0.0132 |
| slr1315 | G0:0009309 | <1e-4 | sl10898 | G0:0019222 | <1e-4 | slr0606 | G0:0015077 | <1e-4 | slr1866 | G0:0044422 | <1e-4 | slr1944 | G0:0042626 | 0.0132 |
| slr1338 | G0:0071554 | <1e-4 | slr1816 | G0:0044282 | <1e-4 | slr0249 | G0:0015291 | <1e-4 | sl11527 | G0:0005575 | <1e-4 | sl10691 | G0:0042626 | 0.0132 |
| slr0109 | G0:0043648 | <1e-4 | sl10982 | G0:0019637 | <1e-4 | sl17034 | G0:0060089 | <1e-4 | ss10353 | G0:0044464 | <1e-4 | slr6104 | G0:0042626 | 0.0132 |
| slr2103 | G0:0031640 | <1e-4 | slr1681 | G0:0006082 | <1e-4 | slr0273 | G0:0042623 | <1e-4 | sl10286 | G0:0005575 | <1e-4 | ss12138 | G0:0042626 | 0.0132 |
| slr5017 | G0:0050801 | <1e-4 | slr1406 | G0:0072521 | <1e-4 | slr0516 | G0:0022891 | <1e-4 | ssr5011 | G0:0043226 | <1e-4 | ss17051 | G0:0042626 | 0.0132 |
| sl11880 | G0:0042451 | <1e-4 | slr0491 | G0:0044282 | <1e-4 | sl11940 | G0:0015077 | <1e-4 | slr1658 | G0:0044444 | <1e-4 | ssr6062 | G0:0042626 | 0.0132 |
| ss13829 | G0:0006721 | <1e-4 | ssl7074 | G0:0043170 | <1e-4 | ssr0335 | G0:0015293 | <1e-4 | slr6047 | G0:0005575 | <1e-4 | slr2070 | G0:0042626 | 0.0132 |
| sl10237 | G0:0051716 | <1e-4 | sl11222 | G0:0042451 | <1e-4 | slr1774 | G0:0022857 | <1e-4 | ssr2972 | G0:0044425 | <1e-4 | sl11926 | G0:0042626 | 0.0132 |
| slr0680 | G0:0019752 | <1e-4 | slr1590 | G0:0009161 | <1e-4 | slr1098 | G0:0022832 | <1e-4 | sl15063 | G0:0005575 | <1e-4 | ssr2067 | G0:0042626 | 0.0132 |
| sl17069 | G0:0051347 | <1e-4 | ssr1499 | G0:0009991 | <1e-4 | sl10314 | G0:0022832 | <1e-4 | slr1083 | G0:0044425 | <1e-4 | slr7102 | G0:0042626 | 0.0132 |

|          |            |       |          |            |       |          |            |       |          |            |        |          |            |        |
|----------|------------|-------|----------|------------|-------|----------|------------|-------|----------|------------|--------|----------|------------|--------|
| ssl1377  | G0:0009987 | <1e-4 | sll1359  | G0:0009124 | <1e-4 | slr1505  | G0:0016818 | <1e-4 | slr0318  | G0:0044446 | <1e-4  | ssr2711  | G0:0042626 | 0.0132 |
| sll10062 | G0:0043436 | <1e-4 | slr0689  | G0:0051186 | <1e-4 | slr1690  | G0:0008171 | <1e-4 | slr0729  | G0:0005575 | <1e-4  | slr0590  | G0:0042626 | 0.0132 |
| sll18004 | G0:0009059 | <1e-4 | ssl2971  | G0:0009991 | <1e-4 | sll10572 | G0:0015399 | <1e-4 | sll10615 | G0:0044424 | <1e-4  | slr1174  | G0:0042626 | 0.0132 |
| slr1306  | G0:0009308 | <1e-4 | slr0589  | G0:0009889 | <1e-4 | sll10265 | G0:0022803 | <1e-4 | sll10751 | G0:0044422 | <1e-4  | slr1394  | G0:0042626 | 0.0132 |
| ssr6078  | G0:0006733 | <1e-4 | sll1188  | G0:0009259 | <1e-4 | slr1611  | G0:0022836 | <1e-4 | slr0147  | G0:0044464 | <1e-4  | slr1425  | G0:0042626 | 0.0132 |
| slr0699  | G0:0050789 | <1e-4 | slr0273  | G0:0019219 | <1e-4 | sll10641 | G0:0022803 | <1e-4 | sll10785 | G0:0044424 | <1e-4  | sll17070 | G0:0042626 | 0.0132 |
| ssr0102  | G0:0031326 | <1e-4 | sll17087 | G0:0044271 | <1e-4 | slr7080  | G0:0015399 | <1e-4 | ssr7079  | G0:0005575 | <1e-4  | ssr6089  | G0:0042626 | 0.0132 |
| ssl10353 | G0:0065007 | <1e-4 | slr0937  | G0:0006091 | <1e-4 | slr1431  | G0:0003674 | <1e-4 | slr1788  | G0:0044422 | <1e-4  | slr5112  | G0:0042626 | 0.0132 |
| ssl17021 | G0:0009309 | <1e-4 | sll10909 | G0:0065007 | <1e-4 | slr0082  | G0:0015399 | <1e-4 | sll11571 | G0:0044446 | <1e-4  | slr0013  | G0:0042626 | 0.0132 |
| ssr1041  | G0:0006733 | <1e-4 | slr0157  | G0:0009991 | <1e-4 | ssr0102  | G0:0016462 | <1e-4 | slr1668  | G0:0043226 | <1e-4  | slr5024  | G0:0042626 | 0.0132 |
| sll10932 | G0:0044275 | <1e-4 | sll10456 | G0:0051246 | <1e-4 | sll11155 | G0:0015399 | <1e-4 | slr0373  | G0:0044422 | <1e-4  | sll18001 | G0:0042626 | 0.0132 |
| slr1363  | G0:0019751 | <1e-4 | sll15003 | G0:0043933 | <1e-4 | sll10381 | G0:0022838 | <1e-4 | slr0731  | G0:0044425 | <1e-4  | slr0670  | G0:0042626 | 0.0132 |
| sll11166 | G0:0043648 | <1e-4 | slr1142  | G0:0009987 | <1e-4 | slr0602  | G0:0003674 | <1e-4 | ssr7035  | G0:0043226 | <1e-4  | sll11131 | G0:0042626 | 0.0132 |
| slr7101  | G0:0009057 | <1e-4 | ssr1765  | G0:0080090 | <1e-4 | sll11702 | G0:0016818 | <1e-4 | sll11634 | G0:0005575 | <1e-4  | sll15063 | G0:0042626 | 0.0132 |
| slr1241  | G0:0034654 | <1e-4 | ssl0294  | G0:0048522 | <1e-4 | sll11131 | G0:0022838 | <1e-4 | sll10839 | G0:0044464 | <1e-4  | sll10563 | G0:0042626 | 0.0132 |
| sll10980 | G0:0045184 | <1e-4 | sll10103 | G0:0019219 | <1e-4 | slr1073  | G0:0003674 | <1e-4 | sll11601 | G0:0043226 | <1e-4  | slr0516  | G0:0042626 | 0.0132 |
| sll15032 | G0:0065007 | <1e-4 | sll1222  | G0:0009132 | <1e-4 | slr2084  | G0:0016818 | <1e-4 | sll10497 | G0:0005575 | <1e-4  | sll17069 | G0:0042626 | 0.0132 |
| sll11834 | G0:0031326 | <1e-4 | slr1384  | G0:0006753 | <1e-4 | slr1690  | G0:0042623 | <1e-4 | slr1203  | G0:0044446 | <1e-4  | sll10062 | G0:0042626 | 0.0132 |
| slr0516  | G0:0008150 | <1e-4 | slr1507  | G0:0034660 | <1e-4 | sll10846 | G0:0043167 | <1e-4 | slr1628  | G0:0044464 | <1e-4  | slr0273  | G0:0042626 | 0.0132 |
| slr0771  | G0:0009144 | <1e-4 | ssr7036  | G0:0009308 | <1e-4 | sll10499 | G0:0022836 | <1e-4 | slr5118  | G0:0044425 | <1e-4  | slr0313  | G0:0042626 | 0.0132 |
| slr2052  | G0:0050896 | <1e-4 | sll10310 | G0:0006733 | <1e-4 | sll10564 | G0:0016818 | <1e-4 | slr7083  | G0:0044425 | <1e-4  | sll11254 | G0:0042626 | 0.0132 |
| sll10997 | G0:0044248 | <1e-4 | sll10525 | G0:0051246 | <1e-4 | sll15004 | G0:0043492 | <1e-4 | sll15067 | G0:0044444 | <1e-4  | sll10101 | G0:0042626 | 0.0132 |
| slr6066  | G0:0046394 | <1e-4 | sll11009 | G0:0022607 | <1e-4 | sll11049 | G0:0015075 | <1e-4 | ssr3341  | G0:0044422 | <1e-4  | ss15068  | G0:0042626 | 0.0132 |
| slr1097  | G0:0051246 | <1e-4 | ssr3571  | G0:0006631 | <1e-4 | ssr1375  | G0:0003674 | <1e-4 | ssr1425  | G0:0044446 | <1e-4  | sll17090 | G0:0042626 | 0.0132 |
| slr1236  | G0:0051186 | <1e-4 | slr0509  | G0:0043436 | <1e-4 | sll10685 | G0:0016818 | <1e-4 | slr0065  | G0:0044422 | <1e-4  | ssr7017  | G0:0042626 | 0.0132 |
| slr0455  | G0:0009309 | <1e-4 | sll11542 | G0:0006732 | <1e-4 | slr5119  | G0:0015291 | <1e-4 | slr0318  | G0:0043226 | <1e-4  | sll17033 | G0:0042626 | 0.0132 |
| sll11218 | G0:0001932 | <1e-4 | sll11174 | G0:0034654 | <1e-4 | ss13549  | G0:0016817 | <1e-4 | sll11715 | G0:0044422 | <1e-4  | sll15089 | G0:0042626 | 0.0132 |
| ssr6030  | G0:0006576 | <1e-4 | slr1815  | G0:0022607 | <1e-4 | slr1122  | G0:0015399 | <1e-4 | ssr1951  | G0:0044425 | <1e-4  | ssr2781  | G0:0016874 | 0.013  |
| slr0273  | G0:0065007 | <1e-4 | slr1143  | G0:0046164 | <1e-4 | sll15063 | G0:0016818 | <1e-4 | slr1327  | G0:0005575 | <1e-4  | sll11775 | G0:0016874 | 0.013  |
| slr0514  | G0:0046483 | <1e-4 | slr6008  | G0:0009056 | <1e-4 | sll10488 | G0:0022890 | <1e-4 | slr0888  | G0:0005575 | <1e-4  | sll11526 | G0:0042626 | 0.013  |
| slr0780  | G0:0031640 | <1e-4 | sll11938 | G0:0044282 | <1e-4 | slr6014  | G0:0015077 | <1e-4 | sll10252 | G0:0003824 | 0.9436 | slr0408  | G0:0016874 | 0.013  |
| ssr3410  | G0:0051716 | <1e-4 | sll10761 | G0:0050789 | <1e-4 | ssr5120  | G0:0015405 | <1e-4 | sll10985 | G0:0003824 | 0.9024 | ss10353  | G0:0042626 | 0.013  |
| sll11797 | G0:0044283 | <1e-4 | sll10543 | G0:0016053 | <1e-4 | slr1143  | G0:0016817 | <1e-4 | slr0602  | G0:0003824 | 0.8497 | slr0594  | G0:0042626 | 0.013  |
| slr1084  | G0:0006091 | <1e-4 | slr1854  | G0:0065007 | <1e-4 | sll11054 | G0:0005342 | <1e-4 | sll10242 | G0:0003824 | 0.819  | sll10763 | G0:0016874 | 0.013  |
| slr0111  | G0:0006066 | <1e-4 | sll11469 | G0:0016054 | <1e-4 | slr1636  | G0:0015399 | <1e-4 | sll10445 | G0:0003824 | 0.8041 | sll10783 | G0:0042626 | 0.013  |
| slr0169  | G0:0006721 | <1e-4 | slr0326  | G0:0044248 | <1e-4 | sll10266 | G0:0043167 | <1e-4 | sll10641 | G0:0003824 | 0.8041 | slr2084  | G0:0016874 | 0.013  |
| slr1603  | G0:0006811 | <1e-4 | sll10525 | G0:0006091 | <1e-4 | sll11203 | G0:0005342 | <1e-4 | slr1644  | G0:0003824 | 0.794  | slr1811  | G0:0042626 | 0.013  |
| sll11469 | G0:0034654 | <1e-4 | slr6067  | G0:0034641 | <1e-4 | slr7082  | G0:0022891 | <1e-4 | slr1215  | G0:0003824 | 0.7824 | sll10732 | G0:0042626 | 0.013  |
| sll1698  | G0:0072522 | <1e-4 | slr1932  | G0:0009132 | <1e-4 | sll11289 | G0:0015399 | <1e-4 | sll10861 | G0:0008152 | 0.7678 | sll10647 | G0:0016874 | 0.013  |
| slr1163  | G0:0009117 | <1e-4 | slr1117  | G0:0009199 | <1e-4 | slr1066  | G0:0043492 | <1e-4 | slr1812  | G0:0003824 | 0.758  | sll10022 | G0:0042626 | 0.013  |
| sll11505 | G0:0009142 | <1e-4 | sll10602 | G0:0006220 | <1e-4 | sll11752 | G0:0015077 | <1e-4 | slr1636  | G0:0003824 | 0.758  | slr0589  | G0:0042626 | 0.013  |
| ss16035  | G0:0019222 | <1e-4 | slr7082  | G0:0006732 | <1e-4 | slr6100  | G0:0022890 | <1e-4 | sll10931 | G0:0003824 | 0.758  | slr1032  | G0:0016874 | 0.013  |
| slr1932  | G0:0009144 | <1e-4 | ss10750  | G0:0051186 | <1e-4 | sll10867 | G0:0042623 | <1e-4 | ss10294  | G0:0003824 | 0.7324 | slr1047  | G0:0042626 | 0.013  |
| sll10496 | G0:0052111 | <1e-4 | sll10765 | G0:0009263 | <1e-4 | slr1533  | G0:0016746 | <1e-4 | sll10584 | G0:0003824 | 0.7324 | slr0442  | G0:0016874 | 0.013  |
| sll10656 | G0:0019637 | <1e-4 | slr2120  | G0:0009161 | <1e-4 | sll10449 | G0:0022836 | <1e-4 | sll11763 | G0:0003824 | 0.7324 | sll10361 | G0:0042626 | 0.013  |
| slr1614  | G0:0009308 | <1e-4 | slr1918  | G0:0050801 | <1e-4 | sll10630 | G0:0015405 | <1e-4 | sll11293 | G0:0003824 | 0.7324 | sll10910 | G0:0042626 | 0.013  |
| ss16061  | G0:0043648 | <1e-4 | sll10191 | G0:0072522 | <1e-4 | ss10738  | G0:0022832 | <1e-4 | sll11527 | G0:0003824 | 0.7324 | sll11250 | G0:0016874 | 0.013  |
| sll10098 | G0:0044275 | <1e-4 | sll11873 | G0:0006163 | <1e-4 | slr6021  | G0:0060089 | <1e-4 | sll10861 | G0:0016020 | 0.7212 | slr1800  | G0:0042626 | 0.013  |
| slr0148  | G0:0009308 | <1e-4 | slr0250  | G0:0044106 | <1e-4 | slr1276  | G0:0022891 | <1e-4 | slr0765  | G0:0003824 | 0.6998 | slr1301  | G0:0042626 | 0.013  |
| sll16053 | G0:0043549 | <1e-4 | ssr2754  | G0:0009057 | <1e-4 | sll10872 | G0:0015293 | <1e-4 | sll10735 | G0:0003824 | 0.6998 | sll10272 | G0:0016874 | 0.013  |
| slr0708  | G0:0006576 | <1e-4 | sll11004 | G0:0031323 | <1e-4 | sll10539 | G0:0043492 | <1e-4 | sll11222 | G0:0003824 | 0.6998 | sll10933 | G0:0004871 | 0.0127 |
| sll11873 | G0:0016054 | <1e-4 | slr1753  | G0:0072528 | <1e-4 | sll11858 | G0:0022803 | <1e-4 | slr1774  | G0:0003824 | 0.6998 | slr1444  | G0:0006807 | 0.0126 |
| sll11186 | G0:0072524 | <1e-4 | slr0780  | G0:0006082 | <1e-4 | sll18035 | G0:0015291 | <1e-4 | sll11528 | G0:0003824 | 0.6998 | ss12996  | G0:0006807 | 0.0126 |
| sll10060 | G0:0031323 | <1e-4 | sll10369 | G0:0071841 | <1e-4 | slr1628  | G0:0015077 | <1e-4 | sll11446 | G0:0003824 | 0.6998 | slr1767  | G0:0006807 | 0.0126 |



|         |            |       |         |            |       |         |            |       |         |            |        |         |            |        |
|---------|------------|-------|---------|------------|-------|---------|------------|-------|---------|------------|--------|---------|------------|--------|
| slr1572 | G0:0009117 | <1e-4 | s111570 | G0:0071496 | <1e-4 | s110175 | G0:0003674 | <1e-4 | ssr3154 | G0:0003824 | 0.6998 | ssr1391 | G0:0006807 | 0.0126 |
| s111570 | G0:0043549 | <1e-4 | s111912 | G0:0046483 | <1e-4 | ssr3300 | G0:0015291 | <1e-4 | s111272 | G0:0003824 | 0.6998 | slr0496 | G0:0006807 | 0.0126 |
| slr1074 | G0:0044281 | <1e-4 | slr2073 | G0:0006066 | <1e-4 | s111749 | G0:0005342 | <1e-4 | slr0108 | G0:0003824 | 0.6998 | ss11377 | G0:0006807 | 0.0126 |
| s110645 | G0:0046907 | <1e-4 | slr1493 | G0:0009161 | <1e-4 | slr1670 | G0:0043167 | <1e-4 | s110252 | G0:0016020 | 0.696  | s110577 | G0:0006807 | 0.0126 |
| slr0398 | G0:0019222 | <1e-4 | ssr2047 | G0:0044003 | <1e-4 | slr1681 | G0:0016462 | <1e-4 | slr2092 | G0:0003824 | 0.6589 | s110822 | G0:0006807 | 0.0126 |
| s117086 | G0:0043648 | <1e-4 | ss12781 | G0:0052111 | <1e-4 | slr1547 | G0:0016817 | <1e-4 | slr0491 | G0:0003824 | 0.6589 | s110183 | G0:0006807 | 0.0126 |
| slr1218 | G0:0009161 | <1e-4 | s110265 | G0:0071496 | <1e-4 | s110547 | G0:0022857 | <1e-4 | ssr2843 | G0:0003824 | 0.6589 | s111526 | G0:0006807 | 0.0126 |
| slr1570 | G0:0050801 | <1e-4 | s110804 | G0:0016052 | <1e-4 | slr2052 | G0:0022838 | <1e-4 | ssr2049 | G0:0003824 | 0.6589 | slr0978 | G0:0006807 | 0.0126 |
| slr0921 | G0:0050801 | <1e-4 | slr0356 | G0:0051246 | <1e-4 | s110156 | G0:0060089 | <1e-4 | s110661 | G0:0003824 | 0.6589 | s110192 | G0:0006807 | 0.0126 |
| s111267 | G0:0071842 | <1e-4 | s111163 | G0:0009132 | <1e-4 | slr1495 | G0:0022857 | <1e-4 | slr0579 | G0:0003824 | 0.6226 | s111611 | G0:0006807 | 0.0126 |
| slr6049 | G0:0046164 | <1e-4 | s111608 | G0:0006163 | <1e-4 | s117031 | G0:0016462 | <1e-4 | s111912 | G0:0003824 | 0.6226 | ssr2781 | G0:0008233 | 0.0125 |
| ssr1256 | G0:0044271 | <1e-4 | s110412 | G0:0009263 | <1e-4 | slr6088 | G0:0043492 | <1e-4 | slr0442 | G0:0003824 | 0.6226 | slr0919 | G0:0008233 | 0.0125 |
| slr0458 | G0:0019752 | <1e-4 | slr1537 | G0:0006811 | <1e-4 | slr1612 | G0:0022890 | <1e-4 | s110763 | G0:0003824 | 0.6226 | slr0208 | G0:0008233 | 0.0125 |
| ssr2142 | G0:0016052 | <1e-4 | ss11378 | G0:0046483 | <1e-4 | slr0569 | G0:0015075 | <1e-4 | s111749 | G0:0003824 | 0.6226 | s110932 | G0:0008233 | 0.0125 |
| slr1436 | G0:0009117 | <1e-4 | slr8044 | G0:0022607 | <1e-4 | s110641 | G0:0015399 | <1e-4 | slr1495 | G0:0003824 | 0.6226 | s111119 | G0:0008233 | 0.0125 |
| slr1676 | G0:0071554 | <1e-4 | slr1394 | G0:0051188 | <1e-4 | slr0023 | G0:0022803 | <1e-4 | slr0919 | G0:0003824 | 0.6226 | s110647 | G0:0008233 | 0.0125 |
| s110412 | G0:0010556 | <1e-4 | slr1391 | G0:0008150 | <1e-4 | slr0729 | G0:0016462 | <1e-4 | s110269 | G0:0003824 | 0.6226 | slr1565 | G0:0008233 | 0.0125 |
| ss13573 | G0:0009126 | <1e-4 | slr5073 | G0:0050794 | <1e-4 | ss15008 | G0:0022892 | <1e-4 | s110103 | G0:0003824 | 0.6226 | s111749 | G0:0008233 | 0.0125 |
| slr0103 | G0:0016053 | <1e-4 | s110428 | G0:0009199 | <1e-4 | slr2073 | G0:0008171 | <1e-4 | s110702 | G0:0003824 | 0.6226 | slr0263 | G0:0006259 | 0.0124 |
| s111979 | G0:0006163 | <1e-4 | s111601 | G0:0019219 | <1e-4 | s110157 | G0:0022832 | <1e-4 | s110932 | G0:0003824 | 0.6226 | slr1811 | G0:0006259 | 0.0124 |
| slr6101 | G0:0009394 | <1e-4 | s110263 | G0:0090304 | <1e-4 | slr6049 | G0:0022891 | <1e-4 | ssr2803 | G0:0003824 | 0.6226 | ss11377 | G0:0006259 | 0.0124 |
| slr0456 | G0:0043436 | <1e-4 | s116053 | G0:0009199 | <1e-4 | s110406 | G0:0015291 | <1e-4 | ssr2781 | G0:0003824 | 0.6226 | slr0609 | G0:0006259 | 0.0124 |
| slr1218 | G0:0009059 | <1e-4 | s110611 | G0:0072528 | <1e-4 | s111698 | G0:0022836 | <1e-4 | slr0980 | G0:0003824 | 0.6226 | s111526 | G0:0006259 | 0.0124 |
| ssr5092 | G0:0046128 | <1e-4 | ssr2317 | G0:0034654 | <1e-4 | slr2073 | G0:0022892 | <1e-4 | s110272 | G0:0003824 | 0.6226 | s111611 | G0:0006259 | 0.0124 |
| slr1819 | G0:0071840 | <1e-4 | s110647 | G0:0046394 | <1e-4 | slr1023 | G0:0005342 | <1e-4 | s111775 | G0:0003824 | 0.6226 | slr1767 | G0:0006259 | 0.0124 |
| s110984 | G0:0044282 | <1e-4 | s110909 | G0:0009126 | <1e-4 | ss15045 | G0:0003674 | <1e-4 | ss10832 | G0:0003824 | 0.6226 | s110910 | G0:0019538 | 0.0123 |
| ss11255 | G0:0006576 | <1e-4 | ssr1528 | G0:0019222 | <1e-4 | s110446 | G0:0016817 | <1e-4 | slr0848 | G0:0003824 | 0.6226 | s111751 | G0:0019538 | 0.0123 |
| s110218 | G0:0051171 | <1e-4 | slr0885 | G0:0005996 | <1e-4 | s111660 | G0:0015075 | <1e-4 | slr0208 | G0:0003824 | 0.6226 | slr1926 | G0:0019538 | 0.0123 |
| slr8021 | G0:0034654 | <1e-4 | slr1636 | G0:0009142 | <1e-4 | ssr2848 | G0:0015399 | <1e-4 | slr1565 | G0:0003824 | 0.6226 | s110558 | G0:0019538 | 0.0123 |
| slr1920 | G0:0006576 | <1e-4 | slr1547 | G0:0009124 | <1e-4 | slr0816 | G0:0022857 | <1e-4 | s111250 | G0:0003824 | 0.6226 | slr1811 | G0:0019538 | 0.0123 |
| slr0498 | G0:0006163 | <1e-4 | s110496 | G0:0019362 | <1e-4 | s111660 | G0:0022838 | <1e-4 | s110985 | G0:0016020 | 0.6145 | s110022 | G0:0019538 | 0.0123 |
| slr2004 | G0:0044271 | <1e-4 | slr1864 | G0:0009132 | <1e-4 | s110590 | G0:0015405 | <1e-4 | slr0589 | G0:0003824 | 0.573  | slr1865 | G0:0019538 | 0.0123 |
| slr5037 | G0:0071842 | <1e-4 | slr1644 | G0:0006721 | <1e-4 | slr1958 | G0:0043167 | <1e-4 | s110022 | G0:0003824 | 0.573  | slr0978 | G0:0019538 | 0.0123 |
| slr1816 | G0:0071841 | <1e-4 | slr7098 | G0:0031326 | <1e-4 | slr0038 | G0:0016817 | <1e-4 | slr0607 | G0:0003824 | 0.573  | slr1307 | G0:0019538 | 0.0123 |
| s110985 | G0:0042455 | <1e-4 | slr0303 | G0:0080090 | <1e-4 | slr6016 | G0:0015267 | <1e-4 | slr1444 | G0:0003824 | 0.573  | s110788 | G0:0019538 | 0.0123 |
| slr0337 | G0:0019637 | <1e-4 | s111193 | G0:0080090 | <1e-4 | slr0456 | G0:0015405 | <1e-4 | s110910 | G0:0003824 | 0.573  | slr1959 | G0:0019538 | 0.0123 |
| s111613 | G0:0019222 | <1e-4 | slr1827 | G0:0022607 | <1e-4 | slr6008 | G0:0022836 | <1e-4 | slr1301 | G0:0003824 | 0.573  | slr0496 | G0:0019538 | 0.0123 |
| s111254 | G0:0009132 | <1e-4 | slr1612 | G0:0065007 | <1e-4 | s110185 | G0:0015075 | <1e-4 | slr0479 | G0:0003824 | 0.573  | slr1444 | G0:0019538 | 0.0123 |
| slr1800 | G0:0080090 | <1e-4 | slr5116 | G0:0009057 | <1e-4 | slr1601 | G0:0003674 | <1e-4 | s110783 | G0:0003824 | 0.573  | slr0263 | G0:0019538 | 0.0123 |
| s110543 | G0:0042180 | <1e-4 | s111162 | G0:0051234 | <1e-4 | ssr6027 | G0:0015405 | <1e-4 | slr1307 | G0:0003824 | 0.573  | s110586 | G0:0019538 | 0.0123 |
| slr0325 | G0:0019222 | <1e-4 | slr2071 | G0:0006163 | <1e-4 | slr0634 | G0:0015291 | <1e-4 | slr0263 | G0:0003824 | 0.573  | ss12733 | G0:0019538 | 0.0123 |
| s111447 | G0:0009308 | <1e-4 | slr7024 | G0:0009309 | <1e-4 | slr1774 | G0:0042623 | <1e-4 | s110788 | G0:0003824 | 0.573  | slr1847 | G0:0019538 | 0.0123 |
| s111608 | G0:0065007 | <1e-4 | s110822 | G0:0009259 | <1e-4 | ssr2201 | G0:0015405 | <1e-4 | slr0496 | G0:0003824 | 0.573  | s111858 | G0:0004518 | 0.012  |
| slr0196 | G0:0043170 | <1e-4 | ss11972 | G0:0009889 | <1e-4 | slr2010 | G0:0015291 | <1e-4 | ssr1391 | G0:0003824 | 0.573  | ss11255 | G0:0004518 | 0.012  |
| s111151 | G0:0051186 | <1e-4 | s110309 | G0:0046128 | <1e-4 | s111262 | G0:0016817 | <1e-4 | s110732 | G0:0003824 | 0.573  | slr1385 | G0:0004518 | 0.012  |
| slr0498 | G0:0071840 | <1e-4 | ssr1765 | G0:0048523 | <1e-4 | s115090 | G0:0022803 | <1e-4 | slr1098 | G0:0003824 | 0.573  | s111355 | G0:0015031 | 0.0118 |
| slr0848 | G0:0048519 | <1e-4 | slr0148 | G0:0042180 | <1e-4 | ss12996 | G0:0015399 | <1e-4 | slr0514 | G0:0003824 | 0.573  | ss13379 | G0:0015031 | 0.0118 |
| slr0865 | G0:0045184 | <1e-4 | slr0521 | G0:0044248 | <1e-4 | s111446 | G0:0003674 | <1e-4 | s110183 | G0:0003824 | 0.573  | slr1535 | G0:0015031 | 0.0118 |
| s111681 | G0:0044260 | <1e-4 | s110473 | G0:0051818 | <1e-4 | slr1920 | G0:0015293 | <1e-4 | s110505 | G0:0003824 | 0.573  | s118033 | G0:0015031 | 0.0118 |
| s115063 | G0:0044260 | <1e-4 | s111191 | G0:0009124 | <1e-4 | s111766 | G0:0015399 | <1e-4 | s110175 | G0:0003824 | 0.573  | slr0569 | G0:0015031 | 0.0118 |
| slr1442 | G0:0034641 | <1e-4 | ssr1391 | G0:0046128 | <1e-4 | s111477 | G0:0022857 | <1e-4 | slr0594 | G0:0003824 | 0.573  | s111862 | G0:0015031 | 0.0118 |
| s117066 | G0:0005996 | <1e-4 | s110198 | G0:0072528 | <1e-4 | ssr2781 | G0:0016741 | <1e-4 | slr0740 | G0:0003824 | 0.573  | slr1619 | G0:0015031 | 0.0118 |
| slr1189 | G0:0065007 | <1e-4 | s111511 | G0:0006631 | <1e-4 | s111164 | G0:0015293 | <1e-4 | slr1767 | G0:0003824 | 0.573  | s110436 | G0:0015031 | 0.0118 |
| s111232 | G0:0071554 | <1e-4 | s111562 | G0:0051186 | <1e-4 | s110572 | G0:0015267 | <1e-4 | s111526 | G0:0003824 | 0.573  | s110443 | G0:0015031 | 0.0118 |

|         |            |       |          |            |       |         |            |       |         |            |        |         |            |        |
|---------|------------|-------|----------|------------|-------|---------|------------|-------|---------|------------|--------|---------|------------|--------|
| slr6013 | G0:0034654 | <1e-4 | ssr1473  | G0:0044271 | <1e-4 | ssl1552 | G0:0022891 | <1e-4 | ssl0353 | G0:0003824 | 0.573  | sl11939 | G0:0015031 | 0.0118 |
| slr0821 | G0:0044260 | <1e-4 | sl11247  | G0:0080090 | <1e-4 | sl11135 | G0:0005342 | <1e-4 | ssl1377 | G0:0003824 | 0.573  | sl10167 | G0:0015031 | 0.0118 |
| slr0751 | G0:0052111 | <1e-4 | sl115067 | G0:0009123 | <1e-4 | slr6103 | G0:0015405 | <1e-4 | slr1865 | G0:0003824 | 0.573  | slr7025 | G0:0015031 | 0.0118 |
| slr1425 | G0:0055114 | <1e-4 | slr0888  | G0:0009309 | <1e-4 | sl10875 | G0:0015399 | <1e-4 | sl11751 | G0:0003824 | 0.573  | slr0264 | G0:0015031 | 0.0118 |
| slr7010 | G0:0044271 | <1e-4 | ssl15113 | G0:0072524 | <1e-4 | slr1188 | G0:0015267 | <1e-4 | slr0609 | G0:0003824 | 0.573  | slr1104 | G0:0015031 | 0.0118 |
| sl11240 | G0:0034654 | <1e-4 | ssr6002  | G0:0044106 | <1e-4 | slr0729 | G0:0060089 | <1e-4 | slr1431 | G0:0008152 | 0.5561 | slr1920 | G0:0015031 | 0.0118 |
| slr1023 | G0:0009893 | <1e-4 | slr0765  | G0:0044255 | <1e-4 | slr6029 | G0:0016741 | <1e-4 | slr0602 | G0:0016020 | 0.5475 | ssr1951 | G0:0015031 | 0.0118 |
| ssr6062 | G0:0009142 | <1e-4 | sl115004 | G0:0065007 | <1e-4 | sl11086 | G0:0022803 | <1e-4 | sl10068 | G0:0008152 | 0.5474 | slr0655 | G0:0015031 | 0.0118 |
| slr1363 | G0:0005996 | <1e-4 | slr0784  | G0:0008610 | <1e-4 | sl10931 | G0:0016746 | <1e-4 | slr1045 | G0:0003824 | 0.5363 | slr1263 | G0:0015031 | 0.0118 |
| slr1470 | G0:0034654 | <1e-4 | sl10022  | G0:0051171 | <1e-4 | slr1362 | G0:0016817 | <1e-4 | sl10447 | G0:0003824 | 0.5363 | slr2118 | G0:0015031 | 0.0118 |
| ssl5027 | G0:0055114 | <1e-4 | ssl15100 | G0:0051171 | <1e-4 | slr6073 | G0:0016818 | <1e-4 | slr1023 | G0:0003824 | 0.5363 | ssr5120 | G0:0015031 | 0.0118 |
| slr1419 | G0:0044281 | <1e-4 | sl10595  | G0:0044106 | <1e-4 | slr0243 | G0:0022892 | <1e-4 | slr1918 | G0:0003824 | 0.5363 | slr0179 | G0:0015031 | 0.0118 |
| slr1862 | G0:0010556 | <1e-4 | sl10281  | G0:0009165 | <1e-4 | sl10822 | G0:0016746 | <1e-4 | slr0376 | G0:0003824 | 0.5363 | sl10609 | G0:0015031 | 0.0118 |
| sl11158 | G0:0008150 | <1e-4 | sl10984  | G0:0048519 | <1e-4 | slr6029 | G0:0043492 | <1e-4 | sl10354 | G0:0003824 | 0.5363 | slr6072 | G0:0015031 | 0.0118 |
| slr1778 | G0:0044282 | <1e-4 | ssr2803  | G0:0009142 | <1e-4 | sl10997 | G0:0016818 | <1e-4 | ssl3692 | G0:0003824 | 0.5363 | slr1923 | G0:0015031 | 0.0118 |
| ssl0739 | G0:0009150 | <1e-4 | sl10243  | G0:0008150 | <1e-4 | sl10625 | G0:0015291 | <1e-4 | sl11218 | G0:0003824 | 0.5363 | sl11797 | G0:0015031 | 0.0118 |
| sl11609 | G0:0019219 | <1e-4 | slr0294  | G0:0019222 | <1e-4 | slr0305 | G0:0015075 | <1e-4 | sl10274 | G0:0003824 | 0.5363 | ssr6079 | G0:0015031 | 0.0118 |
| sl17028 | G0:0006732 | <1e-4 | slr1778  | G0:0051246 | <1e-4 | slr0959 | G0:0022891 | <1e-4 | ssr1375 | G0:0003824 | 0.5363 | sl11414 | G0:0015031 | 0.0118 |
| sl10888 | G0:0052188 | <1e-4 | slr1235  | G0:0045184 | <1e-4 | slr0680 | G0:0015077 | <1e-4 | slr1557 | G0:0003824 | 0.5363 | slr1768 | G0:0015031 | 0.0118 |
| sl11912 | G0:0006066 | <1e-4 | slr1396  | G0:0009309 | <1e-4 | sl12006 | G0:0003674 | <1e-4 | slr1196 | G0:0003824 | 0.5363 | sg10001 | G0:0015031 | 0.0118 |
| sl10737 | G0:0022607 | <1e-4 | sl10614  | G0:0009394 | <1e-4 | ssl2420 | G0:0016817 | <1e-4 | ssl0787 | G0:0003824 | 0.5363 | sl10024 | G0:0015031 | 0.0118 |
| slr0006 | G0:0009308 | <1e-4 | sl10625  | G0:0009165 | <1e-4 | slr0505 | G0:0016462 | <1e-4 | sl10596 | G0:0003824 | 0.5363 | slr1273 | G0:0015031 | 0.0118 |
| slr1235 | G0:0006766 | <1e-4 | slr0654  | G0:0009124 | <1e-4 | slr0483 | G0:0022836 | <1e-4 | sl11934 | G0:0003824 | 0.5363 | sl11232 | G0:0015031 | 0.0118 |
| sl10098 | G0:0051188 | <1e-4 | slr0876  | G0:0044248 | <1e-4 | sl11022 | G0:0043167 | <1e-4 | sl11715 | G0:0003824 | 0.5363 | sl10553 | G0:0015031 | 0.0118 |
| slr7094 | G0:0010468 | <1e-4 | sl11472  | G0:0022607 | <1e-4 | slr1143 | G0:0015405 | <1e-4 | slr1222 | G0:0003824 | 0.5363 | slr1419 | G0:0015031 | 0.0118 |
| sl10225 | G0:0071840 | <1e-4 | sl10103  | G0:0044248 | <1e-4 | slr0510 | G0:0015077 | <1e-4 | slr0304 | G0:0003824 | 0.5363 | slr7014 | G0:0015031 | 0.0118 |
| slr5012 | G0:0046483 | <1e-4 | sl10497  | G0:0006163 | <1e-4 | sl10857 | G0:0015267 | <1e-4 | slr1917 | G0:0003824 | 0.5363 | slr1534 | G0:0015031 | 0.0118 |
| sl10872 | G0:0006066 | <1e-4 | slr0650  | G0:0006066 | <1e-4 | sl10839 | G0:0022832 | <1e-4 | sl10096 | G0:0003824 | 0.5363 | slr0049 | G0:0015031 | 0.0118 |
| slr6068 | G0:0044282 | <1e-4 | slr0664  | G0:0046907 | <1e-4 | slr1464 | G0:0060089 | <1e-4 | slr1025 | G0:0003824 | 0.5363 | sl11552 | G0:0015031 | 0.0118 |
| sl15026 | G0:0051234 | <1e-4 | ssr2060  | G0:0008610 | <1e-4 | ssr3570 | G0:0015405 | <1e-4 | slr1519 | G0:0003824 | 0.5363 | slr0821 | G0:0015031 | 0.0118 |
| ssr7035 | G0:0044248 | <1e-4 | sl11289  | G0:0046164 | <1e-4 | ssl5031 | G0:0022857 | <1e-4 | ssr2848 | G0:0003824 | 0.5363 | slr6005 | G0:0015031 | 0.0118 |
| sl18001 | G0:0009889 | <1e-4 | slr1415  | G0:0051246 | <1e-4 | slr2048 | G0:0015399 | <1e-4 | sl10743 | G0:0003824 | 0.5363 | slr6047 | G0:0015031 | 0.0118 |
| sl11388 | G0:0009987 | <1e-4 | slr5073  | G0:0051347 | <1e-4 | sl10596 | G0:0015267 | <1e-4 | sl11942 | G0:0003824 | 0.5363 | sl11511 | G0:0015031 | 0.0118 |
| sl11680 | G0:0050896 | <1e-4 | slr0634  | G0:0048522 | <1e-4 | sl18033 | G0:0060089 | <1e-4 | sl11318 | G0:0003824 | 0.5363 | ssl1498 | G0:0015031 | 0.0118 |
| sl10810 | G0:0006082 | <1e-4 | slr0924  | G0:0009057 | <1e-4 | slr0082 | G0:0022892 | <1e-4 | slr0551 | G0:0003824 | 0.5363 | slr1384 | G0:0015031 | 0.0118 |
| slr0249 | G0:0043412 | <1e-4 | sl10656  | G0:0009165 | <1e-4 | slr7071 | G0:0022838 | <1e-4 | sl10148 | G0:0003824 | 0.5363 | sl10446 | G0:0016820 | 0.0118 |
| slr1923 | G0:0043648 | <1e-4 | slr6090  | G0:0006091 | <1e-4 | sl10590 | G0:0060089 | <1e-4 | slr0876 | G0:0003824 | 0.5363 | ssr0692 | G0:0016820 | 0.0118 |
| sl11671 | G0:0006576 | <1e-4 | slr1195  | G0:0044260 | <1e-4 | slr0865 | G0:0003674 | <1e-4 | sl10360 | G0:0003824 | 0.5363 | ssr3154 | G0:0016820 | 0.0118 |
| ssl1792 | G0:0044248 | <1e-4 | slr0664  | G0:0050801 | <1e-4 | slr1471 | G0:0016462 | <1e-4 | slr1398 | G0:0003824 | 0.5363 | sl11455 | G0:0006396 | 0.0117 |
| sl11160 | G0:0090304 | <1e-4 | sl10062  | G0:0019752 | <1e-4 | ssr7036 | G0:0015405 | <1e-4 | ssl0109 | G0:0003824 | 0.5363 | slr0480 | G0:0006396 | 0.0117 |
| slr6081 | G0:0044282 | <1e-4 | sl17066  | G0:0009126 | <1e-4 | ssr6062 | G0:0022892 | <1e-4 | slr0305 | G0:0003824 | 0.5363 | sl10499 | G0:0006396 | 0.0117 |
| ssl0242 | G0:0022411 | <1e-4 | ssr3409  | G0:0052111 | <1e-4 | slr1964 | G0:0022832 | <1e-4 | ssr0536 | G0:0003824 | 0.5363 | sl10615 | G0:0006396 | 0.0117 |
| slr2117 | G0:0071842 | <1e-4 | sl10676  | G0:0055086 | <1e-4 | ssl3692 | G0:0008171 | <1e-4 | sl11433 | G0:0003824 | 0.5363 | sl10447 | G0:0006396 | 0.0117 |
| slr1034 | G0:0065007 | <1e-4 | slr0553  | G0:0055082 | <1e-4 | slr0103 | G0:0015405 | <1e-4 | slr0211 | G0:0003824 | 0.5363 | slr1196 | G0:0006396 | 0.0117 |
| sl15004 | G0:0044271 | <1e-4 | ssr0759  | G0:0009893 | <1e-4 | slr2092 | G0:0016462 | <1e-4 | slr0852 | G0:0003824 | 0.5363 | sl11934 | G0:0006396 | 0.0117 |
| sl11926 | G0:0009161 | <1e-4 | sl10783  | G0:0044281 | <1e-4 | ssr6030 | G0:0015267 | <1e-4 | slr0250 | G0:0003824 | 0.5363 | ssr0536 | G0:0006396 | 0.0117 |
| ssl0738 | G0:0065007 | <1e-4 | ssl7045  | G0:0048878 | <1e-4 | sl10787 | G0:0022832 | <1e-4 | slr1659 | G0:0003824 | 0.5363 | slr0305 | G0:0006396 | 0.0117 |
| sl10284 | G0:0071496 | <1e-4 | slr0625  | G0:0009123 | <1e-4 | slr6068 | G0:0016462 | <1e-4 | sl11186 | G0:0003824 | 0.5363 | slr1353 | G0:0006396 | 0.0117 |
| ssr1951 | G0:0051234 | <1e-4 | slr1384  | G0:0009199 | <1e-4 | slr1677 | G0:0016741 | <1e-4 | sl10508 | G0:0003824 | 0.5363 | sl11318 | G0:0006396 | 0.0117 |
| slr1023 | G0:0080090 | <1e-4 | sl11862  | G0:0031323 | <1e-4 | slr0317 | G0:0022832 | <1e-4 | sl10513 | G0:0003824 | 0.5363 | slr0948 | G0:0004518 | 0.0117 |
| sl10167 | G0:0090304 | <1e-4 | sl11505  | G0:0009394 | <1e-4 | slr0305 | G0:0015405 | <1e-4 | slr0287 | G0:0003824 | 0.5363 | slr0373 | G0:0008324 | 0.0117 |
| slr0249 | G0:0022607 | <1e-4 | sl10658  | G0:0043933 | <1e-4 | slr6103 | G0:0016741 | <1e-4 | slr1066 | G0:0003824 | 0.5363 | sl10101 | G0:0004518 | 0.0117 |
| sl11022 | G0:0052188 | <1e-4 | slr5021  | G0:0072524 | <1e-4 | slr1571 | G0:0022803 | <1e-4 | slr1674 | G0:0003824 | 0.5363 | sl11698 | G0:0004518 | 0.0117 |
| slr1162 | G0:0008150 | <1e-4 | slr1168  | G0:0009199 | <1e-4 | sl10218 | G0:0022803 | <1e-4 | sl10301 | G0:0003824 | 0.5363 | sl11582 | G0:0008324 | 0.0117 |

|         |            |       |         |            |       |         |            |       |         |            |        |         |            |        |
|---------|------------|-------|---------|------------|-------|---------|------------|-------|---------|------------|--------|---------|------------|--------|
| ssr2611 | GO:0006066 | <le-4 | ssr2439 | GO:0051171 | <le-4 | s111022 | GO:0022803 | <le-4 | s1r0157 | GO:0003824 | 0.5363 | s1r1790 | GO:0004518 | 0.0117 |
| s110783 | GO:0048878 | <le-4 | s111106 | GO:0042451 | <le-4 | ssr6062 | GO:0042623 | <le-4 | s1r1127 | GO:0003824 | 0.5363 | s1r8021 | GO:0004518 | 0.0117 |
| s111915 | GO:0044248 | <le-4 | s110410 | GO:0010556 | <le-4 | ssr2975 | GO:0016462 | <le-4 | s111455 | GO:0003824 | 0.5363 | s115028 | GO:0004518 | 0.0117 |
| ssr7079 | GO:0055086 | <le-4 | ssr3341 | GO:0051347 | <le-4 | s110160 | GO:0015075 | <le-4 | s1r1391 | GO:0003824 | 0.5363 | ss12138 | GO:0004518 | 0.0117 |
| s111225 | GO:0006163 | <le-4 | s1r0341 | GO:0009394 | <le-4 | s111934 | GO:0022857 | <le-4 | ssr1698 | GO:0003824 | 0.5363 | ssr2067 | GO:0004518 | 0.0117 |
| s1r1920 | GO:0019751 | <le-4 | s1r0980 | GO:0019637 | <le-4 | s111634 | GO:0015399 | <le-4 | s1r1376 | GO:0003824 | 0.5363 | s111730 | GO:0008324 | 0.0117 |
| ss17007 | GO:0071840 | <le-4 | s1r0810 | GO:0006631 | <le-4 | s1r1851 | GO:0022891 | <le-4 | s110424 | GO:0003824 | 0.5363 | s110394 | GO:0004518 | 0.0117 |
| s1r1505 | GO:0043436 | <le-4 | s117077 | GO:0046164 | <le-4 | s110167 | GO:0043492 | <le-4 | s1r0545 | GO:0003824 | 0.5363 | ssr6024 | GO:0004518 | 0.0117 |
| s1r1572 | GO:0046164 | <le-4 | s1r0169 | GO:0022607 | <le-4 | s110174 | GO:0022803 | <le-4 | s110854 | GO:0003824 | 0.5363 | s1r7071 | GO:0004518 | 0.0117 |
| s1r0313 | GO:0034654 | <le-4 | s1r6016 | GO:0072521 | <le-4 | s111702 | GO:0022892 | <le-4 | s1r0871 | GO:0003824 | 0.5363 | s1r1668 | GO:0008324 | 0.0117 |
| s111882 | GO:0065007 | <le-4 | ss11792 | GO:0072521 | <le-4 | s1r0111 | GO:0015267 | <le-4 | s110547 | GO:0003824 | 0.5363 | ssr1558 | GO:0004518 | 0.0117 |
| s111173 | GO:0009991 | <le-4 | s1r0723 | GO:0034654 | <le-4 | ss15098 | GO:0043167 | <le-4 | s110413 | GO:0008152 | 0.5353 | s111072 | GO:0008324 | 0.0117 |
| ss11300 | GO:0043549 | <le-4 | s110263 | GO:0006631 | <le-4 | s1r0364 | GO:0015267 | <le-4 | s1r1812 | GO:0008152 | 0.5353 | s1r2110 | GO:0004518 | 0.0117 |
| s111979 | GO:0008150 | <le-4 | ssr1473 | GO:0055114 | <le-4 | s1r0989 | GO:0022892 | <le-4 | s110641 | GO:0016020 | 0.522  | s1r0610 | GO:0004518 | 0.0117 |
| s1r6063 | GO:0009259 | <le-4 | s1r2070 | GO:0034641 | <le-4 | s110241 | GO:0016818 | <le-4 | s110314 | GO:0003824 | 0.5134 | s1r1911 | GO:0004518 | 0.0117 |
| s1r2118 | GO:0072524 | <le-4 | ss12733 | GO:0048878 | <le-4 | s1r6004 | GO:0016817 | <le-4 | s1r1913 | GO:0003824 | 0.5134 | s1r1303 | GO:0008324 | 0.0117 |
| s1r0921 | GO:0033013 | <le-4 | s1r0609 | GO:0009132 | <le-4 | s117065 | GO:0005342 | <le-4 | s110309 | GO:0003824 | 0.5134 | s110047 | GO:0004518 | 0.0117 |
| ssr2333 | GO:0019752 | <le-4 | s111469 | GO:0022411 | <le-4 | s110584 | GO:0016741 | <le-4 | s1r1999 | GO:0003824 | 0.5134 | s1r1450 | GO:0004518 | 0.0117 |
| s1r1681 | GO:0009987 | <le-4 | ssr2318 | GO:0008150 | <le-4 | s1r1104 | GO:0022838 | <le-4 | s1r0404 | GO:0003824 | 0.5134 | s111464 | GO:0004518 | 0.0117 |
| s115067 | GO:0046483 | <le-4 | ss12245 | GO:0065007 | <le-4 | s111163 | GO:0015077 | <le-4 | s1r1593 | GO:0003824 | 0.5134 | ss10483 | GO:0008324 | 0.0117 |
| s1r7102 | GO:0006631 | <le-4 | ss17021 | GO:0018130 | <le-4 | s1r0575 | GO:0043167 | <le-4 | ssr2755 | GO:0003824 | 0.5134 | s1r2115 | GO:0008324 | 0.0117 |
| s111217 | GO:0010468 | <le-4 | s110381 | GO:0072522 | <le-4 | s1r0380 | GO:0022832 | <le-4 | s1r1778 | GO:0003824 | 0.5134 | s111049 | GO:0004518 | 0.0117 |
| s1r5101 | GO:0006721 | <le-4 | s1r6065 | GO:0051246 | <le-4 | s1r1519 | GO:0022890 | <le-4 | ssr1765 | GO:0003824 | 0.5134 | s1r0957 | GO:0008324 | 0.0117 |
| ss13573 | GO:0048523 | <le-4 | ss18008 | GO:0071842 | <le-4 | s110098 | GO:0022890 | <le-4 | s1r0348 | GO:0003824 | 0.5134 | s111251 | GO:0008324 | 0.0117 |
| s1r1116 | GO:0031326 | <le-4 | s1r6009 | GO:0044282 | <le-4 | ss15129 | GO:0016817 | <le-4 | s111315 | GO:0003824 | 0.5134 | s110685 | GO:0008324 | 0.0117 |
| s110406 | GO:0051716 | <le-4 | s1r0845 | GO:0071496 | <le-4 | ssr2803 | GO:0016818 | <le-4 | s1r0519 | GO:0003824 | 0.5134 | s1r0654 | GO:0008324 | 0.0117 |
| s1r1266 | GO:0071841 | <le-4 | sg10001 | GO:0010556 | <le-4 | s1r1851 | GO:0008171 | <le-4 | s1r1880 | GO:0003824 | 0.5134 | s118012 | GO:0004518 | 0.0117 |
| s110793 | GO:0001932 | <le-4 | s1r0865 | GO:0031323 | <le-4 | ss17046 | GO:0043492 | <le-4 | s111630 | GO:0003824 | 0.5134 | s1r1383 | GO:0008324 | 0.0117 |
| s110400 | GO:0009141 | <le-4 | ssr2711 | GO:0043436 | <le-4 | s1r1150 | GO:0042623 | <le-4 | s1r1275 | GO:0003824 | 0.5134 | s110249 | GO:0004518 | 0.0117 |
| s111009 | GO:0044281 | <le-4 | s1r0148 | GO:0043648 | <le-4 | s110350 | GO:0015291 | <le-4 | s1r1573 | GO:0003824 | 0.5134 | s110909 | GO:0008324 | 0.0117 |
| s111511 | GO:0016054 | <le-4 | s111002 | GO:0034641 | <le-4 | s111485 | GO:0015075 | <le-4 | s111835 | GO:0003824 | 0.5134 | s110572 | GO:0008324 | 0.0117 |
| s110496 | GO:0009260 | <le-4 | s1r1142 | GO:0043436 | <le-4 | s110846 | GO:0022892 | <le-4 | s110524 | GO:0003824 | 0.5134 | s1r0728 | GO:0004518 | 0.0117 |
| s111191 | GO:0046128 | <le-4 | ss11378 | GO:0051818 | <le-4 | s117064 | GO:0008171 | <le-4 | s1r1081 | GO:0003824 | 0.5134 | s110359 | GO:0008324 | 0.0117 |
| s1r2004 | GO:0042451 | <le-4 | s110183 | GO:0034641 | <le-4 | s1r1177 | GO:0022891 | <le-4 | s110066 | GO:0003824 | 0.5134 | ss18028 | GO:0004518 | 0.0117 |
| s1r0172 | GO:0009132 | <le-4 | s1r1223 | GO:0001932 | <le-4 | ssr6026 | GO:0022891 | <le-4 | s1r1932 | GO:0003824 | 0.5134 | s111319 | GO:0004518 | 0.0117 |
| s110282 | GO:0080090 | <le-4 | s111717 | GO:0042451 | <le-4 | s1r1484 | GO:0022803 | <le-4 | s1r1885 | GO:0003824 | 0.5134 | s111201 | GO:0008324 | 0.0117 |
| s111021 | GO:0008150 | <le-4 | s110410 | GO:0019752 | <le-4 | s1r1915 | GO:0015405 | <le-4 | s1r2122 | GO:0003824 | 0.5134 | s110479 | GO:0004518 | 0.0117 |
| s110160 | GO:0048519 | <le-4 | s1r1915 | GO:0009132 | <le-4 | s110749 | GO:0015077 | <le-4 | s1r1854 | GO:0003824 | 0.5134 | ssr7084 | GO:0004518 | 0.0117 |
| s1r7060 | GO:0043436 | <le-4 | s1r1206 | GO:0031323 | <le-4 | s111652 | GO:0043167 | <le-4 | s110185 | GO:0003824 | 0.5134 | ss15113 | GO:0004518 | 0.0117 |
| s110478 | GO:0065007 | <le-4 | s1r1431 | GO:0043436 | <le-4 | s1r1303 | GO:0016462 | <le-4 | s1r0386 | GO:0003824 | 0.5134 | s111926 | GO:0004518 | 0.0117 |
| ss15031 | GO:0006721 | <le-4 | ss12162 | GO:0009132 | <le-4 | s111698 | GO:0015291 | <le-4 | s1r2121 | GO:0003824 | 0.5134 | s1r1290 | GO:0004518 | 0.0117 |
| s1r0871 | GO:0065007 | <le-4 | s1r1376 | GO:0006576 | <le-4 | ssr6046 | GO:0022892 | <le-4 | s1r0921 | GO:0003824 | 0.5134 | s117077 | GO:0004518 | 0.0117 |
| s110853 | GO:0051188 | <le-4 | s111738 | GO:0050801 | <le-4 | s1r1342 | GO:0022803 | <le-4 | s1r0845 | GO:0003824 | 0.5134 | ssr1155 | GO:0004518 | 0.0117 |
| ssr2060 | GO:0016052 | <le-4 | ss10739 | GO:0050896 | <le-4 | ss10788 | GO:0016741 | <le-4 | s1r0723 | GO:0003824 | 0.5134 | s111832 | GO:0004518 | 0.0117 |
| s1r1363 | GO:0051818 | <le-4 | s1r0680 | GO:0006733 | <le-4 | s1r1102 | GO:0016462 | <le-4 | s1r1788 | GO:0003824 | 0.5134 | ss13615 | GO:0004518 | 0.0117 |
| s1r0552 | GO:0048518 | <le-4 | s118033 | GO:0048518 | <le-4 | s110354 | GO:0005342 | <le-4 | s110497 | GO:0003824 | 0.5134 | s1r0650 | GO:0008324 | 0.0117 |
| s110149 | GO:0016070 | <le-4 | s1r1327 | GO:0006721 | <le-4 | ss15100 | GO:0022836 | <le-4 | s111965 | GO:0003824 | 0.5134 | s1r0981 | GO:0008324 | 0.0117 |
| s1r6047 | GO:0019222 | <le-4 | s1r0271 | GO:0009987 | <le-4 | s1r1209 | GO:0043167 | <le-4 | s1r1676 | GO:0003824 | 0.5134 | s110740 | GO:0008324 | 0.0117 |
| ssr1473 | GO:0072527 | <le-4 | ss11046 | GO:0010468 | <le-4 | s111571 | GO:0016818 | <le-4 | s1r0023 | GO:0003824 | 0.5134 | s111151 | GO:0004518 | 0.0117 |
| ss10109 | GO:0055114 | <le-4 | s110864 | GO:0009142 | <le-4 | s1r1862 | GO:0015405 | <le-4 | s111530 | GO:0003824 | 0.5134 | s111654 | GO:0008324 | 0.0117 |
| s112013 | GO:0051716 | <le-4 | s1r0634 | GO:0009987 | <le-4 | s1r0388 | GO:0015405 | <le-4 | s110177 | GO:0003824 | 0.5134 | s1r2052 | GO:0004518 | 0.0117 |
| s1r0967 | GO:0046128 | <le-4 | s111995 | GO:0033013 | <le-4 | s1r0059 | GO:0022803 | <le-4 | s110756 | GO:0003824 | 0.5134 | s110044 | GO:0004518 | 0.0117 |
| s1r7060 | GO:0009991 | <le-4 | ssr2142 | GO:0009262 | <le-4 | s110284 | GO:0016818 | <le-4 | s1r1530 | GO:0003824 | 0.5134 | s111505 | GO:0008324 | 0.0117 |
| s111912 | GO:0010556 | <le-4 | s111109 | GO:0006066 | <le-4 | s110661 | GO:0022803 | <le-4 | s1r0431 | GO:0003824 | 0.5134 | s1r0587 | GO:0004518 | 0.0117 |

|         |            |       |         |            |       |          |            |       |         |            |        |         |            |        |
|---------|------------|-------|---------|------------|-------|----------|------------|-------|---------|------------|--------|---------|------------|--------|
| sl10310 | G0:0045184 | <1e-4 | slr1449 | G0:0048522 | <1e-4 | slr0656  | G0:0015293 | <1e-4 | slr1571 | G0:0003824 | 0.5134 | sl10625 | G0:0004518 | 0.0117 |
| slr1900 | G0:0009308 | <1e-4 | slr1940 | G0:0022607 | <1e-4 | slr6051  | G0:0003674 | <1e-4 | sl11736 | G0:0003824 | 0.5134 | slr1062 | G0:0008324 | 0.0117 |
| sl10218 | G0:0045184 | <1e-4 | ssl2064 | G0:0009132 | <1e-4 | sl10735  | G0:0022857 | <1e-4 | ssr2787 | G0:0003824 | 0.5134 | slr1977 | G0:0008324 | 0.0117 |
| ssr2067 | G0:0042451 | <1e-4 | sl10564 | G0:0006766 | <1e-4 | sl10192  | G0:0015399 | <1e-4 | slr0668 | G0:0003824 | 0.5134 | slr0699 | G0:0004518 | 0.0117 |
| slr1958 | G0:0009132 | <1e-4 | slr7081 | G0:0019222 | <1e-4 | slr0610  | G0:0015075 | <1e-4 | slr0360 | G0:0003824 | 0.5134 | slr1082 | G0:0008324 | 0.0117 |
| slr0366 | G0:0006082 | <1e-4 | ssl5100 | G0:0006163 | <1e-4 | sl10565  | G0:0022838 | <1e-4 | ssr3122 | G0:0003824 | 0.5134 | slr1816 | G0:0004518 | 0.0117 |
| slr0594 | G0:0019637 | <1e-4 | slr0517 | G0:0090304 | <1e-4 | sl11765  | G0:0022838 | <1e-4 | ssr2551 | G0:0003824 | 0.5134 | slr0625 | G0:0004518 | 0.0117 |
| sl15046 | G0:0072521 | <1e-4 | slr5126 | G0:0051186 | <1e-4 | sl10238  | G0:0016746 | <1e-4 | sl11761 | G0:0003824 | 0.5134 | slr0989 | G0:0008324 | 0.0117 |
| slr6031 | G0:0009260 | <1e-4 | slr1383 | G0:0071841 | <1e-4 | slr7059  | G0:0022891 | <1e-4 | slr2073 | G0:0003824 | 0.5134 | ssl5015 | G0:0004518 | 0.0117 |
| slr0489 | G0:0048518 | <1e-4 | slr1070 | G0:0044003 | <1e-4 | slr1636  | G0:0016462 | <1e-4 | sl10780 | G0:0003824 | 0.5134 | slr7100 | G0:0004518 | 0.0117 |
| slr1079 | G0:0009123 | <1e-4 | slr1493 | G0:0008150 | <1e-4 | slr0362  | G0:0015399 | <1e-4 | slr1203 | G0:0003824 | 0.5134 | slr1327 | G0:0004518 | 0.0117 |
| slr1025 | G0:0034641 | <1e-4 | slr6029 | G0:0006720 | <1e-4 | slr1600  | G0:0016817 | <1e-4 | slr1437 | G0:0003824 | 0.5134 | sl10062 | G0:0004518 | 0.0117 |
| slr1623 | G0:0046907 | <1e-4 | slr1069 | G0:0022411 | <1e-4 | slr0637  | G0:0015405 | <1e-4 | ssr2439 | G0:0003824 | 0.5134 | sl11476 | G0:0004518 | 0.0117 |
| sl11730 | G0:0050801 | <1e-4 | sl10446 | G0:0009161 | <1e-4 | sl10023  | G0:0016746 | <1e-4 | sl10381 | G0:0003824 | 0.5134 | slr1886 | G0:0004518 | 0.0117 |
| slr1163 | G0:0044248 | <1e-4 | slr0103 | G0:0044271 | <1e-4 | sl10156  | G0:0022803 | <1e-4 | slr1572 | G0:0003824 | 0.5134 | sl10925 | G0:0004518 | 0.0117 |
| slr6087 | G0:0006811 | <1e-4 | sl10478 | G0:0006091 | <1e-4 | slr1799  | G0:0043167 | <1e-4 | ssl2065 | G0:0003824 | 0.5134 | sl10670 | G0:0004518 | 0.0117 |
| slr7081 | G0:0019752 | <1e-4 | sl11862 | G0:0010468 | <1e-4 | sl11784  | G0:0005342 | <1e-4 | sl10676 | G0:0003824 | 0.5134 | sl11289 | G0:0004518 | 0.0117 |
| slr1429 | G0:0009394 | <1e-4 | slr0948 | G0:0043549 | <1e-4 | slr0876  | G0:0015291 | <1e-4 | sl10085 | G0:0003824 | 0.5134 | slr0181 | G0:0004518 | 0.0117 |
| slr1413 | G0:0009394 | <1e-4 | slr1276 | G0:0051179 | <1e-4 | sl11186  | G0:0043492 | <1e-4 | slr0364 | G0:0003824 | 0.5134 | sl10180 | G0:0008324 | 0.0117 |
| slr0358 | G0:0044255 | <1e-4 | sl10447 | G0:0043436 | <1e-4 | sl111390 | G0:0015075 | <1e-4 | sl11563 | G0:0003824 | 0.5134 | ssl2069 | G0:0004518 | 0.0117 |
| slr7015 | G0:0009126 | <1e-4 | sl11400 | G0:0034641 | <1e-4 | slr1935  | G0:0015399 | <1e-4 | slr1073 | G0:0003824 | 0.5134 | sl12011 | G0:0004518 | 0.0117 |
| slr1025 | G0:0033013 | <1e-4 | slr1659 | G0:0031326 | <1e-4 | sl11289  | G0:0003674 | <1e-4 | sl11262 | G0:0003824 | 0.5134 | slr0334 | G0:0004518 | 0.0117 |
| slr5127 | G0:0008150 | <1e-4 | sl11446 | G0:0090304 | <1e-4 | slr0740  | G0:0005342 | <1e-4 | sl11442 | G0:0003824 | 0.5134 | slr0013 | G0:0004518 | 0.0117 |
| ssl2384 | G0:0048522 | <1e-4 | slr1327 | G0:0009161 | <1e-4 | slr0964  | G0:0043167 | <1e-4 | ssr3571 | G0:0003824 | 0.5134 | ssr2975 | G0:0004518 | 0.0117 |
| ssr2439 | G0:0019752 | <1e-4 | sl10369 | G0:0010468 | <1e-4 | slr1327  | G0:0015075 | <1e-4 | slr0192 | G0:0003824 | 0.5134 | sl10688 | G0:0008324 | 0.0117 |
| sl11388 | G0:0055086 | <1e-4 | slr1441 | G0:0071496 | <1e-4 | sl11764  | G0:0005342 | <1e-4 | slr1177 | G0:0003824 | 0.5134 | slr0241 | G0:0004518 | 0.0117 |
| sl10742 | G0:0009892 | <1e-4 | slr7014 | G0:0009161 | <1e-4 | sl111307 | G0:0043492 | <1e-4 | ssl0352 | G0:0003824 | 0.5134 | slr0975 | G0:0008324 | 0.0117 |
| sl10590 | G0:0018130 | <1e-4 | slr0103 | G0:0031323 | <1e-4 | sl10327  | G0:0016741 | <1e-4 | slr0770 | G0:0003824 | 0.5134 | ssr3572 | G0:0004518 | 0.0117 |
| sl10309 | G0:0034641 | <1e-4 | sl10192 | G0:0009892 | <1e-4 | slr0770  | G0:0042623 | <1e-4 | sl10532 | G0:0003824 | 0.5134 | sl17070 | G0:0004518 | 0.0117 |
| sl11344 | G0:0071841 | <1e-4 | sl10803 | G0:0009124 | <1e-4 | sl11835  | G0:0022857 | <1e-4 | slr0144 | G0:0003824 | 0.5134 | slr1875 | G0:0004518 | 0.0117 |
| slr1544 | G0:0006082 | <1e-4 | slr1657 | G0:0048523 | <1e-4 | sl11062  | G0:0022832 | <1e-4 | slr1084 | G0:0003824 | 0.5134 | slr0885 | G0:0004518 | 0.0117 |
| ssr6027 | G0:0044260 | <1e-4 | slr1812 | G0:0046128 | <1e-4 | slr6014  | G0:0015291 | <1e-4 | slr2111 | G0:0003824 | 0.5134 | sl15128 | G0:0004518 | 0.0117 |
| slr0325 | G0:0009142 | <1e-4 | sl11834 | G0:0034641 | <1e-4 | slr0784  | G0:0022890 | <1e-4 | ssr2962 | G0:0003824 | 0.5134 | slr0291 | G0:0004518 | 0.0117 |
| sl10198 | G0:0044260 | <1e-4 | slr6013 | G0:0055082 | <1e-4 | slr6106  | G0:0022803 | <1e-4 | ssr2142 | G0:0016020 | 0.5087 | slr0613 | G0:0004518 | 0.0117 |
| slr0264 | G0:0071841 | <1e-4 | slr1101 | G0:0009892 | <1e-4 | slr7082  | G0:0008171 | <1e-4 | slr1431 | G0:0016020 | 0.5087 | slr0510 | G0:0008324 | 0.0117 |
| slr1854 | G0:0006220 | <1e-4 | sl15030 | G0:0031326 | <1e-4 | ssl5098  | G0:0022857 | <1e-4 | sl10584 | G0:0008152 | 0.5033 | ssl7021 | G0:0004518 | 0.0117 |
| sl10982 | G0:0019362 | <1e-4 | slr1122 | G0:0052188 | <1e-4 | slr0058  | G0:0016817 | <1e-4 | sl10068 | G0:0016020 | 0.5033 | slr0483 | G0:0008324 | 0.0117 |
| sl11509 | G0:0048518 | <1e-4 | slr7024 | G0:0060255 | <1e-4 | sl15132  | G0:0015399 | <1e-4 | sl10688 | G0:0003824 | 0.4943 | sl11089 | G0:0004518 | 0.0117 |
| slr0667 | G0:0008150 | <1e-4 | slr1638 | G0:0009150 | <1e-4 | sl10414  | G0:0015267 | <1e-4 | sl10180 | G0:0003824 | 0.4943 | sl11979 | G0:0004518 | 0.0117 |
| slr1391 | G0:0009262 | <1e-4 | sl15033 | G0:0043170 | <1e-4 | ssl7048  | G0:0016741 | <1e-4 | sl10297 | G0:0003824 | 0.4943 | sl16052 | G0:0004518 | 0.0117 |
| slr1507 | G0:0006082 | <1e-4 | slr5013 | G0:0009142 | <1e-4 | slr0362  | G0:0005342 | <1e-4 | slr0957 | G0:0003824 | 0.4943 | slr0605 | G0:0008324 | 0.0117 |
| sl11995 | G0:0043436 | <1e-4 | sl15033 | G0:0051818 | <1e-4 | sl10931  | G0:0015267 | <1e-4 | sl11239 | G0:0003824 | 0.4943 | sl11925 | G0:0008324 | 0.0117 |
| slr0872 | G0:0071496 | <1e-4 | slr1179 | G0:0048519 | <1e-4 | sl11509  | G0:0016817 | <1e-4 | sl11659 | G0:0003824 | 0.4943 | ssl3382 | G0:0008324 | 0.0117 |
| slr0521 | G0:0006066 | <1e-4 | slr1397 | G0:0009987 | <1e-4 | slr5013  | G0:0022803 | <1e-4 | sl10359 | G0:0003824 | 0.4943 | slr0976 | G0:0004518 | 0.0117 |
| sl11389 | G0:0009124 | <1e-4 | slr0930 | G0:0048523 | <1e-4 | slr1619  | G0:0042623 | <1e-4 | sl10810 | G0:0003824 | 0.4943 | sl10412 | G0:0008324 | 0.0117 |
| sl11485 | G0:0071840 | <1e-4 | sl10286 | G0:0046907 | <1e-4 | sl15090  | G0:0015077 | <1e-4 | slr1809 | G0:0003824 | 0.4943 | sl10608 | G0:0004518 | 0.0117 |
| sl11414 | G0:0071842 | <1e-4 | sl16055 | G0:0052111 | <1e-4 | slr0959  | G0:0015267 | <1e-4 | slr1590 | G0:0003824 | 0.4943 | slr0812 | G0:0004518 | 0.0117 |
| sl15028 | G0:0072528 | <1e-4 | sl10864 | G0:0051246 | <1e-4 | sl11401  | G0:0015405 | <1e-4 | ssr1528 | G0:0003824 | 0.4943 | slr2003 | G0:0004518 | 0.0117 |
| sl11660 | G0:0044260 | <1e-4 | sl10982 | G0:0051716 | <1e-4 | slr0348  | G0:0043167 | <1e-4 | sl11938 | G0:0003824 | 0.4943 | sl17078 | G0:0004518 | 0.0117 |
| slr0476 | G0:0006766 | <1e-4 | slr6094 | G0:0009117 | <1e-4 | slr1534  | G0:0015267 | <1e-4 | slr1895 | G0:0003824 | 0.4943 | ssl7038 | G0:0004518 | 0.0117 |
| slr1353 | G0:0009161 | <1e-4 | slr1034 | G0:0008150 | <1e-4 | sl10905  | G0:0022836 | <1e-4 | sl11660 | G0:0003824 | 0.4943 | slr1056 | G0:0004518 | 0.0117 |
| slr0376 | G0:0044248 | <1e-4 | sl11696 | G0:0006066 | <1e-4 | slr8044  | G0:0003674 | <1e-4 | slr1033 | G0:0003824 | 0.4943 | sl11381 | G0:0004518 | 0.0117 |
| sl11002 | G0:0008610 | <1e-4 | sl10860 | G0:0009309 | <1e-4 | sl10238  | G0:0022891 | <1e-4 | sl10141 | G0:0003824 | 0.4943 | slr0082 | G0:0004518 | 0.0117 |
| sl11389 | G0:0019219 | <1e-4 | slr1854 | G0:0044260 | <1e-4 | sl10609  | G0:0015291 | <1e-4 | sl10685 | G0:0003824 | 0.4943 | ssr3300 | G0:0008324 | 0.0117 |

|          |            |       |          |            |       |          |            |       |          |            |        |          |            |        |
|----------|------------|-------|----------|------------|-------|----------|------------|-------|----------|------------|--------|----------|------------|--------|
| ssr6078  | G0:0009892 | <1e-4 | ssl5008  | G0:0009059 | <1e-4 | slr2004  | G0:0015267 | <1e-4 | sll1072  | G0:0003824 | 0.4943 | sll1352  | G0:0008324 | 0.0117 |
| sll1681  | G0:0006720 | <1e-4 | slr1547  | G0:0009150 | <1e-4 | slr1789  | G0:0022832 | <1e-4 | sll0871  | G0:0003824 | 0.4943 | sll0321  | G0:0004518 | 0.0117 |
| sll1021  | G0:0022607 | <1e-4 | slr0575  | G0:0048523 | <1e-4 | sll18027 | G0:0022836 | <1e-4 | sll17065 | G0:0003824 | 0.4943 | slr0397  | G0:0004518 | 0.0117 |
| ssr6027  | G0:0080090 | <1e-4 | ssr2318  | G0:0006793 | <1e-4 | slr11107 | G0:0015075 | <1e-4 | ssr2754  | G0:0003824 | 0.4943 | slr6081  | G0:0004518 | 0.0117 |
| ssr2962  | G0:0009987 | <1e-4 | slr0249  | G0:0009987 | <1e-4 | ssr2802  | G0:0022891 | <1e-4 | slr1288  | G0:0003824 | 0.4943 | sll15003 | G0:0004518 | 0.0117 |
| slr1767  | G0:0009057 | <1e-4 | sll11730 | G0:0006091 | <1e-4 | slr1914  | G0:0022832 | <1e-4 | slr1493  | G0:0003824 | 0.4943 | slr0358  | G0:0008324 | 0.0117 |
| ssr5020  | G0:0046483 | <1e-4 | ssl7007  | G0:0005996 | <1e-4 | sll17031 | G0:0016746 | <1e-4 | slr1658  | G0:0003824 | 0.4943 | ss10410  | G0:0004518 | 0.0117 |
| sll10608 | G0:0009308 | <1e-4 | sll11307 | G0:0009161 | <1e-4 | sll11954 | G0:0015267 | <1e-4 | sll10669 | G0:0003824 | 0.4943 | sll10160 | G0:0004518 | 0.0117 |
| ssl13573 | G0:0044260 | <1e-4 | ssl5025  | G0:0071840 | <1e-4 | sll11225 | G0:0016462 | <1e-4 | sll11201 | G0:0003824 | 0.4943 | sll10871 | G0:0008324 | 0.0117 |
| sll17077 | G0:0080090 | <1e-4 | ssl8008  | G0:0044275 | <1e-4 | sll11527 | G0:0022803 | <1e-4 | slr2005  | G0:0003824 | 0.4943 | ssr0336  | G0:0004518 | 0.0117 |
| sll10802 | G0:0072527 | <1e-4 | slr1670  | G0:0022411 | <1e-4 | sll10761 | G0:0060089 | <1e-4 | sll11873 | G0:0003824 | 0.4943 | ss11690  | G0:0004518 | 0.0117 |
| sll11193 | G0:0019637 | <1e-4 | slr11173 | G0:0071840 | <1e-4 | sll15090 | G0:0016462 | <1e-4 | slr1668  | G0:0003824 | 0.4943 | ss10467  | G0:0004518 | 0.0117 |
| sll10630 | G0:0009893 | <1e-4 | sll10309 | G0:0019222 | <1e-4 | sll11254 | G0:0022803 | <1e-4 | slr0989  | G0:0003824 | 0.4943 | ss12971  | G0:0004518 | 0.0117 |
| sll11530 | G0:0019752 | <1e-4 | sll10867 | G0:0046128 | <1e-4 | slr0845  | G0:0015075 | <1e-4 | slr0272  | G0:0003824 | 0.4943 | slr0967  | G0:0004518 | 0.0117 |
| sll10609 | G0:0055082 | <1e-4 | sll10615 | G0:0009132 | <1e-4 | ssr3571  | G0:0015075 | <1e-4 | slr0789  | G0:0003824 | 0.4943 | sll16055 | G0:0004518 | 0.0117 |
| ssl5027  | G0:0051347 | <1e-4 | sll11267 | G0:0009150 | <1e-4 | slr2048  | G0:0022803 | <1e-4 | sll10888 | G0:0003824 | 0.4943 | slr1852  | G0:0008324 | 0.0117 |
| ssl2595  | G0:0019752 | <1e-4 | sll11232 | G0:0019222 | <1e-4 | slr0519  | G0:0016817 | <1e-4 | sll10837 | G0:0003824 | 0.4943 | ss15025  | G0:0004518 | 0.0117 |
| slr1230  | G0:0043933 | <1e-4 | sll10658 | G0:0019751 | <1e-4 | sll11318 | G0:0015293 | <1e-4 | slr0060  | G0:0003824 | 0.4943 | ss11263  | G0:0004518 | 0.0117 |
| sll10867 | G0:0006753 | <1e-4 | sll11164 | G0:0080090 | <1e-4 | sll10853 | G0:0022836 | <1e-4 | sll10740 | G0:0003824 | 0.4943 | ss15068  | G0:0004518 | 0.0117 |
| sll15062 | G0:0044283 | <1e-4 | slr1957  | G0:0009059 | <1e-4 | sll10525 | G0:0005342 | <1e-4 | slr0053  | G0:0003824 | 0.4943 | sll11192 | G0:0004518 | 0.0117 |
| slr0723  | G0:0042455 | <1e-4 | slr1618  | G0:0006576 | <1e-4 | slr1438  | G0:0016817 | <1e-4 | sll10911 | G0:0003824 | 0.4943 | sll10875 | G0:0004518 | 0.0117 |
| slr1087  | G0:0044271 | <1e-4 | slr7098  | G0:0006793 | <1e-4 | ssr2553  | G0:0015077 | <1e-4 | slr0664  | G0:0003824 | 0.4943 | sll11036 | G0:0004518 | 0.0117 |
| slr1236  | G0:0006091 | <1e-4 | ssl3379  | G0:0046164 | <1e-4 | slr1970  | G0:0015267 | <1e-4 | slr0456  | G0:0003824 | 0.4943 | sll11873 | G0:0008324 | 0.0117 |
| slr6022  | G0:0006721 | <1e-4 | sll10496 | G0:0034654 | <1e-4 | slr7011  | G0:0015291 | <1e-4 | sm10011  | G0:0003824 | 0.4943 | ss10350  | G0:0004518 | 0.0117 |
| sll10572 | G0:0043549 | <1e-4 | sll11186 | G0:0019222 | <1e-4 | sll10803 | G0:0015293 | <1e-4 | ssr1552  | G0:0003824 | 0.4943 | slr6087  | G0:0004518 | 0.0117 |
| slr0482  | G0:0048518 | <1e-4 | sll11764 | G0:0034660 | <1e-4 | sll10167 | G0:0015405 | <1e-4 | sll11170 | G0:0003824 | 0.4943 | sll11891 | G0:0004518 | 0.0117 |
| sll1696  | G0:0048878 | <1e-4 | sll11119 | G0:0044275 | <1e-4 | ss10461  | G0:0022892 | <1e-4 | slr0742  | G0:0003824 | 0.4943 | slr1613  | G0:0008324 | 0.0117 |
| slr6012  | G0:0065007 | <1e-4 | slr1391  | G0:0005996 | <1e-4 | sll10518 | G0:0008171 | <1e-4 | slr1762  | G0:0003824 | 0.4943 | sll18019 | G0:0004518 | 0.0117 |
| sll10930 | G0:0009260 | <1e-4 | slr0818  | G0:0071841 | <1e-4 | sll10249 | G0:0015399 | <1e-4 | slr1977  | G0:0003824 | 0.4943 | ssr2998  | G0:0004518 | 0.0117 |
| sll10359 | G0:0010468 | <1e-4 | sll10630 | G0:0055082 | <1e-4 | slr0625  | G0:0042623 | <1e-4 | sll10827 | G0:0003824 | 0.4943 | ss13829  | G0:0004518 | 0.0117 |
| sll12011 | G0:0009141 | <1e-4 | sll11938 | G0:0072527 | <1e-4 | sll11766 | G0:0016741 | <1e-4 | sll10752 | G0:0003824 | 0.4943 | slr6104  | G0:0004518 | 0.0117 |
| sll11511 | G0:0048523 | <1e-4 | sll10898 | G0:0051234 | <1e-4 | sll11752 | G0:0022838 | <1e-4 | slr0358  | G0:0003824 | 0.4943 | sll10496 | G0:0004518 | 0.0117 |
| sll16053 | G0:0006811 | <1e-4 | slr1811  | G0:0010556 | <1e-4 | ssr6079  | G0:0022891 | <1e-4 | sll11956 | G0:0003824 | 0.4943 | slr0318  | G0:0008324 | 0.0117 |
| sll10751 | G0:0006721 | <1e-4 | sll10524 | G0:0006082 | <1e-4 | sll11119 | G0:0042623 | <1e-4 | slr1209  | G0:0003824 | 0.4943 | sll10564 | G0:0008324 | 0.0117 |
| slr0818  | G0:0051347 | <1e-4 | sll10659 | G0:0006811 | <1e-4 | ssr2318  | G0:0016818 | <1e-4 | slr0680  | G0:0003824 | 0.4943 | slr1413  | G0:0015031 | 0.0116 |
| sll10283 | G0:0009263 | <1e-4 | slr1194  | G0:0050794 | <1e-4 | slr0581  | G0:0015399 | <1e-4 | slr1258  | G0:0003824 | 0.4943 | slr0442  | G0:0006807 | 0.0116 |
| slr0145  | G0:0051171 | <1e-4 | sll10249 | G0:0009394 | <1e-4 | ss18003  | G0:0015267 | <1e-4 | ssr3300  | G0:0003824 | 0.4943 | ss10832  | G0:0006807 | 0.0116 |
| slr1095  | G0:0050794 | <1e-4 | ssr2998  | G0:0051188 | <1e-4 | slr1425  | G0:0015267 | <1e-4 | slr0650  | G0:0003824 | 0.4943 | sll11372 | G0:0015031 | 0.0116 |
| sll10888 | G0:0006811 | <1e-4 | sll10423 | G0:0031323 | <1e-4 | sll10252 | G0:0015405 | <1e-4 | sll11512 | G0:0003824 | 0.4943 | sll10763 | G0:0006807 | 0.0116 |
| sll11949 | G0:0050801 | <1e-4 | ssr8013  | G0:0009059 | <1e-4 | ss12807  | G0:0015405 | <1e-4 | ss10483  | G0:0003824 | 0.4943 | ssr1258  | G0:0006807 | 0.0116 |
| slr1107  | G0:0006576 | <1e-4 | slr1442  | G0:0044271 | <1e-4 | ss10787  | G0:0005342 | <1e-4 | slr0111  | G0:0003824 | 0.4943 | sll10572 | G0:0015031 | 0.0116 |
| ssr3300  | G0:0051179 | <1e-4 | slr6104  | G0:0043170 | <1e-4 | sll10872 | G0:0005342 | <1e-4 | slr0962  | G0:0003824 | 0.4943 | slr1288  | G0:0015031 | 0.0116 |
| slr0702  | G0:0051171 | <1e-4 | slr0468  | G0:0051818 | <1e-4 | sll10225 | G0:0015075 | <1e-4 | slr1413  | G0:0003824 | 0.4943 | sll11938 | G0:0015031 | 0.0116 |
| sll11921 | G0:0019752 | <1e-4 | sll11630 | G0:0009057 | <1e-4 | slr0109  | G0:0022836 | <1e-4 | sll10995 | G0:0003824 | 0.4943 | slr1287  | G0:0015031 | 0.0116 |
| slr7080  | G0:0051246 | <1e-4 | ssl3451  | G0:0046483 | <1e-4 | sll15004 | G0:0015399 | <1e-4 | sll10449 | G0:0003824 | 0.4943 | slr1383  | G0:0015031 | 0.0116 |
| slr0039  | G0:0072522 | <1e-4 | sll11862 | G0:0034654 | <1e-4 | ssr2060  | G0:0043167 | <1e-4 | sll10564 | G0:0003824 | 0.4943 | sll10787 | G0:0015031 | 0.0116 |
| sll18002 | G0:0019751 | <1e-4 | sll10473 | G0:0048519 | <1e-4 | slr6101  | G0:0015405 | <1e-4 | sll10602 | G0:0003824 | 0.4943 | slr1940  | G0:0015031 | 0.0116 |
| slr6064  | G0:0042180 | <1e-4 | sll10238 | G0:0009126 | <1e-4 | sll10585 | G0:0015267 | <1e-4 | slr0654  | G0:0003824 | 0.4943 | sll11304 | G0:0015031 | 0.0116 |
| sll10498 | G0:0034641 | <1e-4 | slr0334  | G0:0050896 | <1e-4 | slr1464  | G0:0022891 | <1e-4 | sll10539 | G0:0003824 | 0.4943 | sll11424 | G0:0006807 | 0.0116 |
| ssl1792  | G0:0046164 | <1e-4 | ssr8047  | G0:0072524 | <1e-4 | ss10350  | G0:0042623 | <1e-4 | sll11730 | G0:0003824 | 0.4943 | slr2125  | G0:0015031 | 0.0116 |
| sll11378 | G0:0044282 | <1e-4 | ss18005  | G0:0065007 | <1e-4 | sll10688 | G0:0016741 | <1e-4 | slr0605  | G0:0003824 | 0.4943 | slr1690  | G0:0015031 | 0.0116 |
| slr1210  | G0:0048523 | <1e-4 | sll15026 | G0:0042180 | <1e-4 | ss10788  | G0:0022832 | <1e-4 | slr0596  | G0:0003824 | 0.4943 | slr0605  | G0:0015031 | 0.0116 |
| sll10487 | G0:0009394 | <1e-4 | sll11763 | G0:0046907 | <1e-4 | ssr1951  | G0:0060089 | <1e-4 | slr1062  | G0:0003824 | 0.4943 | sll10412 | G0:0015031 | 0.0116 |
| slr7098  | G0:0043933 | <1e-4 | slr1223  | G0:0006163 | <1e-4 | slr1150  | G0:0015293 | <1e-4 | slr0510  | G0:0003824 | 0.4943 | slr7024  | G0:0015031 | 0.0116 |

|         |            |       |          |            |       |         |            |       |         |            |        |         |            |        |
|---------|------------|-------|----------|------------|-------|---------|------------|-------|---------|------------|--------|---------|------------|--------|
| slr1206 | G0:0045184 | <1e-4 | slr0374  | G0:0072528 | <1e-4 | ss15108 | G0:0015075 | <1e-4 | slr0815 | G0:0003824 | 0.4943 | sl10269 | G0:0006807 | 0.0116 |
| sl10558 | G0:0046483 | <1e-4 | slr0650  | G0:0009308 | <1e-4 | slr0810 | G0:0043492 | <1e-4 | sl11267 | G0:0003824 | 0.4943 | sl10103 | G0:0006807 | 0.0116 |
| sl17031 | G0:0072528 | <1e-4 | sl10647  | G0:0044275 | <1e-4 | slr0334 | G0:0043167 | <1e-4 | sl10410 | G0:0003824 | 0.4943 | sl10909 | G0:0015031 | 0.0116 |
| sl10688 | G0:0044260 | <1e-4 | slr2080  | G0:0006793 | <1e-4 | slr0667 | G0:0022832 | <1e-4 | ssr2009 | G0:0003824 | 0.4943 | ssr2201 | G0:0006807 | 0.0116 |
| sl10413 | G0:0009309 | <1e-4 | ssl17038 | G0:0048878 | <1e-4 | ssr2142 | G0:0043492 | <1e-4 | slr1940 | G0:0003824 | 0.4943 | sl15026 | G0:0008324 | 0.0114 |
| sl10781 | G0:0071554 | <1e-4 | sl10602  | G0:0042455 | <1e-4 | sl10659 | G0:0015075 | <1e-4 | ss18008 | G0:0003824 | 0.4943 | slr5023 | G0:0008324 | 0.0114 |
| sl10397 | G0:0009199 | <1e-4 | sl10793  | G0:0043412 | <1e-4 | sl11285 | G0:0016818 | <1e-4 | slr1128 | G0:0003824 | 0.4943 | slr0740 | G0:0008233 | 0.0114 |
| ssr2755 | G0:0034654 | <1e-4 | slr1614  | G0:0043648 | <1e-4 | slr6021 | G0:0016818 | <1e-4 | slr1169 | G0:0003824 | 0.4943 | ssr6020 | G0:0008324 | 0.0114 |
| sl15030 | G0:0044281 | <1e-4 | sl17030  | G0:0052111 | <1e-4 | sl10008 | G0:0015075 | <1e-4 | slr0924 | G0:0003824 | 0.4943 | slr1619 | G0:0008324 | 0.0114 |
| slr0516 | G0:0051234 | <1e-4 | slr0569  | G0:0009259 | <1e-4 | ss11918 | G0:0015291 | <1e-4 | sl11240 | G0:0003824 | 0.4943 | sl10361 | G0:0008233 | 0.0114 |
| slr7091 | G0:0006720 | <1e-4 | sl11752  | G0:0009308 | <1e-4 | sl11698 | G0:0016462 | <1e-4 | ss10739 | G0:0003824 | 0.4943 | sl10048 | G0:0008324 | 0.0114 |
| slr0692 | G0:0016052 | <1e-4 | ssl3692  | G0:0055082 | <1e-4 | sl10167 | G0:0022891 | <1e-4 | sl10590 | G0:0003824 | 0.4943 | sl11389 | G0:0008324 | 0.0114 |
| sl10085 | G0:0051234 | <1e-4 | slr1914  | G0:0006721 | <1e-4 | ssr8047 | G0:0043492 | <1e-4 | slr1152 | G0:0003824 | 0.4943 | sl10803 | G0:0008324 | 0.0114 |
| sl11411 | G0:0019222 | <1e-4 | sl17063  | G0:0009263 | <1e-4 | sl10063 | G0:0015399 | <1e-4 | sl11241 | G0:0003824 | 0.4943 | sl11722 | G0:0008324 | 0.0114 |
| slr0431 | G0:0019362 | <1e-4 | slr1611  | G0:0051171 | <1e-4 | sl10445 | G0:0015399 | <1e-4 | slr0318 | G0:0003824 | 0.4943 | slr1768 | G0:0008324 | 0.0114 |
| slr2103 | G0:0048522 | <1e-4 | sl10505  | G0:0065007 | <1e-4 | slr1541 | G0:0043167 | <1e-4 | slr2125 | G0:0003824 | 0.4943 | slr8014 | G0:0008324 | 0.0114 |
| slr0907 | G0:0051818 | <1e-4 | slr1270  | G0:0009394 | <1e-4 | slr1385 | G0:0015077 | <1e-4 | sl11752 | G0:0003824 | 0.4943 | slr6021 | G0:0008324 | 0.0114 |
| slr1866 | G0:0019222 | <1e-4 | ssr5106  | G0:0048878 | <1e-4 | slr1301 | G0:0022836 | <1e-4 | sl11950 | G0:0003824 | 0.4943 | slr1162 | G0:0008324 | 0.0114 |
| sl15062 | G0:0065007 | <1e-4 | slr1183  | G0:0043436 | <1e-4 | sl10456 | G0:0016462 | <1e-4 | slr1240 | G0:0003824 | 0.4943 | sl11961 | G0:0008324 | 0.0114 |
| slr1970 | G0:0051347 | <1e-4 | slr0592  | G0:0009893 | <1e-4 | sl11757 | G0:0022892 | <1e-4 | sl11251 | G0:0003824 | 0.4943 | slr0151 | G0:0008324 | 0.0114 |
| slr2010 | G0:0050896 | <1e-4 | slr2052  | G0:0052188 | <1e-4 | ssr3402 | G0:0015405 | <1e-4 | sl10225 | G0:0003824 | 0.4943 | slr0333 | G0:0008324 | 0.0114 |
| sl11135 | G0:0080090 | <1e-4 | sl10740  | G0:0008610 | <1e-4 | ssr7093 | G0:0015293 | <1e-4 | sl10909 | G0:0003824 | 0.4943 | slr1069 | G0:0008324 | 0.0114 |
| ssl2064 | G0:0046128 | <1e-4 | slr1789  | G0:0009141 | <1e-4 | ssr0335 | G0:0008171 | <1e-4 | slr1122 | G0:0003824 | 0.4943 | slr0594 | G0:0008233 | 0.0114 |
| slr1998 | G0:0016053 | <1e-4 | sl11608  | G0:0006732 | <1e-4 | sl10781 | G0:0005342 | <1e-4 | sl10189 | G0:0003824 | 0.4943 | ss12009 | G0:0008324 | 0.0114 |
| slr0789 | G0:0009892 | <1e-4 | slr0272  | G0:0006066 | <1e-4 | slr0440 | G0:0042623 | <1e-4 | slr0149 | G0:0003824 | 0.4943 | ssr2611 | G0:0008324 | 0.0114 |
| sl10564 | G0:0031323 | <1e-4 | slr0468  | G0:0044106 | <1e-4 | slr7082 | G0:0022832 | <1e-4 | sl10413 | G0:0016020 | 0.4927 | slr1068 | G0:0008324 | 0.0114 |
| sl17089 | G0:0034654 | <1e-4 | sl11563  | G0:0019752 | <1e-4 | sl10645 | G0:0016746 | <1e-4 | slr1699 | G0:0016020 | 0.4927 | slr1914 | G0:0008324 | 0.0114 |
| ssr7036 | G0:0034641 | <1e-4 | sl15109  | G0:0048518 | <1e-4 | sl15032 | G0:0008171 | <1e-4 | slr1636 | G0:0016020 | 0.4927 | slr1104 | G0:0008324 | 0.0114 |
| ssr0761 | G0:0045184 | <1e-4 | slr6073  | G0:0019752 | <1e-4 | slr2038 | G0:0022836 | <1e-4 | slr1614 | G0:0016020 | 0.4872 | slr0964 | G0:0008324 | 0.0114 |
| slr1601 | G0:0008610 | <1e-4 | slr1186  | G0:0006811 | <1e-4 | sl11866 | G0:0016817 | <1e-4 | ss10750 | G0:0016020 | 0.4872 | sl10762 | G0:0008324 | 0.0114 |
| sl10996 | G0:0044260 | <1e-4 | ssr2611  | G0:0046164 | <1e-4 | slr1303 | G0:0015291 | <1e-4 | sl10779 | G0:0016020 | 0.4872 | ssr6085 | G0:0008324 | 0.0114 |
| sl10103 | G0:0046164 | <1e-4 | slr1087  | G0:0006766 | <1e-4 | ss15031 | G0:0015291 | <1e-4 | sl11763 | G0:0016020 | 0.4872 | ss11377 | G0:0008233 | 0.0114 |
| slr5102 | G0:0034654 | <1e-4 | sl10997  | G0:0001932 | <1e-4 | sl10909 | G0:0042623 | <1e-4 | slr1591 | G0:0008152 | 0.4775 | sl17043 | G0:0008324 | 0.0114 |
| sl11853 | G0:0072527 | <1e-4 | sl10740  | G0:0009132 | <1e-4 | sl11797 | G0:0043492 | <1e-4 | sl11446 | G0:0008152 | 0.4775 | ss12733 | G0:0008233 | 0.0114 |
| slr1270 | G0:0008150 | <1e-4 | slr1533  | G0:0080090 | <1e-4 | sl10361 | G0:0016746 | <1e-4 | slr0147 | G0:0008152 | 0.4775 | slr1306 | G0:0008324 | 0.0114 |
| ssr2201 | G0:0044281 | <1e-4 | sl10069  | G0:0044003 | <1e-4 | slr2122 | G0:0043167 | <1e-4 | slr1773 | G0:0008152 | 0.4775 | sl11769 | G0:0008324 | 0.0114 |
| slr0755 | G0:0071842 | <1e-4 | slr0821  | G0:0046128 | <1e-4 | slr7059 | G0:0022836 | <1e-4 | slr1774 | G0:0008152 | 0.4775 | slr1847 | G0:0008233 | 0.0114 |
| sl10478 | G0:0009126 | <1e-4 | sl10860  | G0:0009987 | <1e-4 | sl10448 | G0:0042623 | <1e-4 | slr0108 | G0:0008152 | 0.4775 | sl10857 | G0:0008324 | 0.0114 |
| slr7010 | G0:0005996 | <1e-4 | ssl3615  | G0:0051246 | <1e-4 | slr7100 | G0:0008171 | <1e-4 | sl11528 | G0:0016020 | 0.474  | slr0263 | G0:0008233 | 0.0114 |
| sl11717 | G0:0009308 | <1e-4 | sl11939  | G0:0031323 | <1e-4 | sl10172 | G0:0015293 | <1e-4 | sl10446 | G0:0016020 | 0.474  | sl18033 | G0:0008324 | 0.0114 |
| ssl1464 | G0:0048519 | <1e-4 | sl18007  | G0:0022607 | <1e-4 | ss12717 | G0:0016817 | <1e-4 | slr1978 | G0:0016020 | 0.474  | slr1168 | G0:0008324 | 0.0114 |
| ssr2554 | G0:0045184 | <1e-4 | slr0038  | G0:0044248 | <1e-4 | slr1444 | G0:0022838 | <1e-4 | slr1773 | G0:0016020 | 0.474  | slr1800 | G0:0008233 | 0.0114 |
| slr0919 | G0:0046164 | <1e-4 | sl10406  | G0:0051246 | <1e-4 | ssr6019 | G0:0008171 | <1e-4 | ssr0692 | G0:0016020 | 0.474  | sl10241 | G0:0008324 | 0.0114 |
| slr0602 | G0:0046907 | <1e-4 | sl15003  | G0:0008150 | <1e-4 | slr0941 | G0:0060089 | <1e-4 | sl11995 | G0:0016020 | 0.474  | slr1363 | G0:0008324 | 0.0114 |
| slr0815 | G0:0055114 | <1e-4 | slr0598  | G0:0009199 | <1e-4 | sl10148 | G0:0015075 | <1e-4 | sl11272 | G0:0016020 | 0.474  | sl15033 | G0:0008324 | 0.0114 |
| ssr3122 | G0:0071841 | <1e-4 | sl10102  | G0:0045184 | <1e-4 | slr6063 | G0:0008171 | <1e-4 | slr0765 | G0:0016020 | 0.474  | slr1813 | G0:0008324 | 0.0114 |
| ssr2551 | G0:0006631 | <1e-4 | slr5012  | G0:0034654 | <1e-4 | sl11289 | G0:0042623 | <1e-4 | slr0147 | G0:0016020 | 0.474  | sl11562 | G0:0008233 | 0.0114 |
| slr0195 | G0:0051179 | <1e-4 | sl11062  | G0:0051179 | <1e-4 | ssr7093 | G0:0022832 | <1e-4 | slr0818 | G0:0016020 | 0.474  | ssr6032 | G0:0008324 | 0.0114 |
| slr1223 | G0:0009991 | <1e-4 | slr0702  | G0:0046164 | <1e-4 | ssr2060 | G0:0022891 | <1e-4 | sl11214 | G0:0016020 | 0.474  | ss15031 | G0:0008324 | 0.0114 |
| slr1546 | G0:0044275 | <1e-4 | sl11132  | G0:0006576 | <1e-4 | sl10268 | G0:0060089 | <1e-4 | sl10898 | G0:0016020 | 0.474  | slr1273 | G0:0008324 | 0.0114 |
| slr0645 | G0:0019752 | <1e-4 | sl10293  | G0:0031323 | <1e-4 | sl10872 | G0:0043492 | <1e-4 | slr0642 | G0:0016020 | 0.474  | sl11866 | G0:0008324 | 0.0114 |
| sl10414 | G0:0006720 | <1e-4 | ssr6019  | G0:0009262 | <1e-4 | sl11866 | G0:0022857 | <1e-4 | sl11858 | G0:0016020 | 0.4431 | slr0978 | G0:0008233 | 0.0114 |
| ssr3572 | G0:0019362 | <1e-4 | sl10763  | G0:0009262 | <1e-4 | slr0149 | G0:0016462 | <1e-4 | sl12007 | G0:0016020 | 0.4431 | slr1611 | G0:0008324 | 0.0114 |
| sl11160 | G0:0051179 | <1e-4 | sl10543  | G0:0009893 | <1e-4 | slr0151 | G0:0005342 | <1e-4 | sl10804 | G0:0016020 | 0.4431 | slr1178 | G0:0008324 | 0.0114 |

|          |            |       |         |            |       |          |            |       |          |            |        |          |            |        |
|----------|------------|-------|---------|------------|-------|----------|------------|-------|----------|------------|--------|----------|------------|--------|
| slr7100  | G0:0010468 | <1e-4 | slr0960 | G0:0046907 | <1e-4 | slr0013  | G0:0022892 | <1e-4 | sl10661  | G0:0016020 | 0.4431 | slr1195  | G0:0008324 | 0.0114 |
| ssl3615  | G0:0006720 | <1e-4 | slr1977 | G0:0055086 | <1e-4 | sl10177  | G0:0022838 | <1e-4 | ssl1255  | G0:0016020 | 0.4431 | slr0909  | G0:0008233 | 0.0114 |
| slr1854  | G0:0016054 | <1e-4 | slr5016 | G0:0051179 | <1e-4 | ssl2595  | G0:0015293 | <1e-4 | slr1702  | G0:0016020 | 0.4431 | slr1397  | G0:0008324 | 0.0114 |
| sl10354  | G0:0046483 | <1e-4 | ssr1041 | G0:0044106 | <1e-4 | sl17006  | G0:0060089 | <1e-4 | slr0359  | G0:0016020 | 0.4431 | sl11880  | G0:0008324 | 0.0114 |
| slr1956  | G0:0071841 | <1e-4 | ssr1765 | G0:0008150 | <1e-4 | sl11247  | G0:0022891 | <1e-4 | slr0810  | G0:0016020 | 0.4431 | sl11396  | G0:0008324 | 0.0114 |
| slr0111  | G0:0001932 | <1e-4 | sl10846 | G0:0044283 | <1e-4 | slr7096  | G0:0022892 | <1e-4 | slr1603  | G0:0016020 | 0.4431 | ssr6003  | G0:0008324 | 0.0114 |
| sl11464  | G0:0006091 | <1e-4 | sl17078 | G0:0008610 | <1e-4 | ssl1552  | G0:0003674 | <1e-4 | slr1095  | G0:0003824 | 0.4397 | slr1047  | G0:0008233 | 0.0114 |
| ssl15103 | G0:0080090 | <1e-4 | slr1104 | G0:0006091 | <1e-4 | slr0313  | G0:0022838 | <1e-4 | slr0769  | G0:0003824 | 0.4397 | ssl15098 | G0:0008324 | 0.0114 |
| sl11541  | G0:0065007 | <1e-4 | slr0059 | G0:0046483 | <1e-4 | sl10242  | G0:0022891 | <1e-4 | sl15062  | G0:0003824 | 0.4397 | sl10063  | G0:0008324 | 0.0114 |
| sl11563  | G0:0071841 | <1e-4 | sl16055 | G0:0043648 | <1e-4 | slr7094  | G0:0022838 | <1e-4 | sl10518  | G0:0003824 | 0.4397 | slr6090  | G0:0008324 | 0.0114 |
| ssr1766  | G0:0034654 | <1e-4 | ssr1425 | G0:0048522 | <1e-4 | slr0337  | G0:0015291 | <1e-4 | sl17047  | G0:0003824 | 0.4397 | slr0784  | G0:0008324 | 0.0114 |
| slr0909  | G0:0006733 | <1e-4 | sl11562 | G0:0072527 | <1e-4 | slr8014  | G0:0005342 | <1e-4 | sg10001  | G0:0003824 | 0.4397 | ssr1407  | G0:0008324 | 0.0114 |
| slr0300  | G0:0009056 | <1e-4 | slr1959 | G0:0009991 | <1e-4 | slr1789  | G0:0015075 | <1e-4 | slr0601  | G0:0003824 | 0.4397 | sl10369  | G0:0008324 | 0.0114 |
| ssr7017  | G0:0008610 | <1e-4 | sl11477 | G0:0046394 | <1e-4 | sl11891  | G0:0015267 | <1e-4 | sl10266  | G0:0003824 | 0.4397 | slr0609  | G0:0008233 | 0.0114 |
| sl11714  | G0:0009165 | <1e-4 | sl10147 | G0:0006721 | <1e-4 | ssl2996  | G0:0015075 | <1e-4 | slr1195  | G0:0003824 | 0.4397 | slr1576  | G0:0008324 | 0.0114 |
| slr0404  | G0:0051818 | <1e-4 | slr0742 | G0:0042455 | <1e-4 | sl12013  | G0:0015077 | <1e-4 | sl11232  | G0:0003824 | 0.4397 | sl18004  | G0:0008324 | 0.0114 |
| slr1800  | G0:0009394 | <1e-4 | sl11912 | G0:0044106 | <1e-4 | slr1864  | G0:0008171 | <1e-4 | sl10284  | G0:0003824 | 0.4397 | slr7013  | G0:0008324 | 0.0114 |
| sl11830  | G0:0051716 | <1e-4 | sl11736 | G0:0044282 | <1e-4 | ssl15108 | G0:0015291 | <1e-4 | ssr6020  | G0:0003824 | 0.4397 | ssr3189  | G0:0008324 | 0.0114 |
| sl11414  | G0:0009987 | <1e-4 | ssl2749 | G0:0009124 | <1e-4 | slr1068  | G0:0015293 | <1e-4 | ssr7036  | G0:0003824 | 0.4397 | slr0821  | G0:0008324 | 0.0114 |
| slr1449  | G0:0034641 | <1e-4 | sl11025 | G0:0060255 | <1e-4 | sl11222  | G0:0043492 | <1e-4 | sl10659  | G0:0003824 | 0.4397 | sl10265  | G0:0008324 | 0.0114 |
| sl11835  | G0:0051188 | <1e-4 | slr1194 | G0:0045184 | <1e-4 | slr1737  | G0:0005342 | <1e-4 | ssr6048  | G0:0003824 | 0.4397 | slr0196  | G0:0008324 | 0.0114 |
| sl10503  | G0:0009142 | <1e-4 | sl11960 | G0:0009141 | <1e-4 | slr0780  | G0:0016818 | <1e-4 | sl18032  | G0:0003824 | 0.4397 | ssl1464  | G0:0008324 | 0.0114 |
| ssr5020  | G0:0050896 | <1e-4 | slr1110 | G0:0071841 | <1e-4 | sl10669  | G0:0016741 | <1e-4 | slr1261  | G0:0003824 | 0.4397 | slr0065  | G0:0008324 | 0.0114 |
| sl10314  | G0:0009144 | <1e-4 | slr0579 | G0:0046128 | <1e-4 | slr1087  | G0:0005342 | <1e-4 | slr1363  | G0:0003824 | 0.4397 | ssl1792  | G0:0008324 | 0.0114 |
| ssl10738 | G0:0006631 | <1e-4 | slr6104 | G0:0044283 | <1e-4 | sl17028  | G0:0016462 | <1e-4 | slr0356  | G0:0003824 | 0.4397 | slr7082  | G0:0008324 | 0.0114 |
| slr1619  | G0:0051246 | <1e-4 | sl17066 | G0:0031323 | <1e-4 | sl10068  | G0:0015267 | <1e-4 | slr1273  | G0:0003824 | 0.4397 | sl11162  | G0:0008324 | 0.0114 |
| sl10596  | G0:0031323 | <1e-4 | sl10539 | G0:0055082 | <1e-4 | ssl15065 | G0:0022803 | <1e-4 | sl10863  | G0:0003824 | 0.4397 | slr6073  | G0:0008324 | 0.0114 |
| ssr2781  | G0:0051246 | <1e-4 | sl10327 | G0:0009057 | <1e-4 | slr0243  | G0:0016817 | <1e-4 | slr1150  | G0:0003824 | 0.4397 | slr1378  | G0:0008324 | 0.0114 |
| slr0313  | G0:0009892 | <1e-4 | slr2105 | G0:0046164 | <1e-4 | sl11906  | G0:0022803 | <1e-4 | ssl10738 | G0:0003824 | 0.4397 | slr1546  | G0:0008324 | 0.0114 |
| slr1378  | G0:0019362 | <1e-4 | sl11571 | G0:0034641 | <1e-4 | ssl1255  | G0:0016817 | <1e-4 | slr7092  | G0:0003824 | 0.4397 | sl10609  | G0:0008324 | 0.0114 |
| slr0496  | G0:0034654 | <1e-4 | slr1240 | G0:0072524 | <1e-4 | slr5101  | G0:0005342 | <1e-4 | ssr3410  | G0:0003824 | 0.4397 | ssr3304  | G0:0008324 | 0.0114 |
| slr2117  | G0:0009889 | <1e-4 | ssl2069 | G0:0051188 | <1e-4 | slr1415  | G0:0060089 | <1e-4 | sl12015  | G0:0003824 | 0.4397 | slr2032  | G0:0008324 | 0.0114 |
| sl10854  | G0:0033013 | <1e-4 | sl10414 | G0:0044271 | <1e-4 | sl16052  | G0:0022832 | <1e-4 | sl11783  | G0:0003824 | 0.4397 | ssl13142 | G0:0008324 | 0.0114 |
| ssl17021 | G0:0044282 | <1e-4 | sl10736 | G0:0006091 | <1e-4 | slr0919  | G0:0043492 | <1e-4 | sl11123  | G0:0003824 | 0.4397 | sl11025  | G0:0008324 | 0.0114 |
| sl10487  | G0:0006220 | <1e-4 | sl11954 | G0:0080090 | <1e-4 | slr1530  | G0:0042623 | <1e-4 | sl10846  | G0:0003824 | 0.4397 | sl10481  | G0:0008324 | 0.0114 |
| ssr6048  | G0:0009165 | <1e-4 | ssr6030 | G0:0009987 | <1e-4 | sl10505  | G0:0003674 | <1e-4 | ssl2717  | G0:0003824 | 0.4397 | slr1811  | G0:0008233 | 0.0114 |
| slr7098  | G0:0072521 | <1e-4 | slr1074 | G0:0044106 | <1e-4 | slr1614  | G0:0005342 | <1e-4 | slr7096  | G0:0003824 | 0.4397 | slr6004  | G0:0008324 | 0.0114 |
| slr1958  | G0:0006793 | <1e-4 | sl11164 | G0:0009161 | <1e-4 | sl11068  | G0:0015293 | <1e-4 | sl10282  | G0:0003824 | 0.4397 | slr1407  | G0:0008324 | 0.0114 |
| slr0333  | G0:0009889 | <1e-4 | slr0730 | G0:0006732 | <1e-4 | slr1658  | G0:0022857 | <1e-4 | slr6090  | G0:0003824 | 0.4397 | sl11906  | G0:0008324 | 0.0114 |
| sl11784  | G0:0034660 | <1e-4 | sl11072 | G0:0006721 | <1e-4 | ssr1766  | G0:0042623 | <1e-4 | slr6021  | G0:0003824 | 0.4397 | sl11939  | G0:0008324 | 0.0114 |
| sl18007  | G0:0072527 | <1e-4 | slr2004 | G0:0046128 | <1e-4 | slr1566  | G0:0015291 | <1e-4 | sl11265  | G0:0003824 | 0.4397 | sl15097  | G0:0008324 | 0.0114 |
| ssr1951  | G0:0018130 | <1e-4 | sl17087 | G0:0006766 | <1e-4 | slr0818  | G0:0015405 | <1e-4 | slr1464  | G0:0003824 | 0.4397 | sl10174  | G0:0008324 | 0.0114 |
| slr0006  | G0:0051716 | <1e-4 | sl11072 | G0:0031326 | <1e-4 | slr0023  | G0:0022857 | <1e-4 | slr0971  | G0:0003824 | 0.4397 | ssl15129 | G0:0008324 | 0.0114 |
| ssr6085  | G0:0009144 | <1e-4 | sl11715 | G0:0034641 | <1e-4 | ssl2996  | G0:0022892 | <1e-4 | slr0355  | G0:0003824 | 0.4397 | sl10406  | G0:0008324 | 0.0114 |
| slr0723  | G0:0044003 | <1e-4 | slr1383 | G0:0046483 | <1e-4 | sl11640  | G0:0022857 | <1e-4 | slr1223  | G0:0003824 | 0.4397 | sl10175  | G0:0008233 | 0.0114 |
| slr0863  | G0:0072524 | <1e-4 | slr0941 | G0:0071554 | <1e-4 | sl15062  | G0:0043492 | <1e-4 | sl11400  | G0:0003824 | 0.4397 | slr1307  | G0:0008233 | 0.0114 |
| sl11285  | G0:0009132 | <1e-4 | slr2080 | G0:0051347 | <1e-4 | slr1944  | G0:0022803 | <1e-4 | ssr6026  | G0:0003824 | 0.4397 | slr0199  | G0:0008324 | 0.0114 |
| slr1259  | G0:0018130 | <1e-4 | slr0325 | G0:0009263 | <1e-4 | sl10397  | G0:0015405 | <1e-4 | sl11155  | G0:0003824 | 0.4397 | sl10448  | G0:0008324 | 0.0114 |
| slr2025  | G0:0009165 | <1e-4 | slr0232 | G0:0043412 | <1e-4 | sl10280  | G0:0015293 | <1e-4 | slr0049  | G0:0003824 | 0.4397 | ssr3341  | G0:0008324 | 0.0114 |
| sl15130  | G0:0018130 | <1e-4 | slr1660 | G0:0051186 | <1e-4 | sl11512  | G0:0016462 | <1e-4 | sl17063  | G0:0003824 | 0.4397 | sl10742  | G0:0008324 | 0.0114 |
| slr6016  | G0:0006163 | <1e-4 | ssl1792 | G0:0009893 | <1e-4 | ssr1768  | G0:0005342 | <1e-4 | slr1178  | G0:0003824 | 0.4397 | slr1188  | G0:0008324 | 0.0114 |
| ssl15007 | G0:0051188 | <1e-4 | slr6013 | G0:0034641 | <1e-4 | slr1444  | G0:0003674 | <1e-4 | slr1407  | G0:0003824 | 0.4397 | sl11863  | G0:0008324 | 0.0114 |
| slr7011  | G0:0009262 | <1e-4 | sl10394 | G0:0071554 | <1e-4 | sl11040  | G0:0015293 | <1e-4 | sl11053  | G0:0003824 | 0.4397 | slr1143  | G0:0008233 | 0.0114 |
| sl10282  | G0:0065007 | <1e-4 | sg10002 | G0:0009165 | <1e-4 | slr1222  | G0:0016817 | <1e-4 | slr6004  | G0:0003824 | 0.4397 | sl11853  | G0:0008324 | 0.0114 |

|         |            |       |         |            |       |         |            |       |         |            |        |         |            |        |
|---------|------------|-------|---------|------------|-------|---------|------------|-------|---------|------------|--------|---------|------------|--------|
| s111738 | G0:0051188 | <1e-4 | s1r6029 | G0:0009150 | <1e-4 | ss12733 | G0:0022803 | <1e-4 | s111401 | G0:0003824 | 0.4397 | s1r6015 | G0:0008324 | 0.0114 |
| s1r1864 | G0:0043648 | <1e-4 | s1r0948 | G0:0009263 | <1e-4 | s1r6106 | G0:0060089 | <1e-4 | s1r1660 | G0:0003824 | 0.4397 | s1r0380 | G0:0008324 | 0.0114 |
| ssr5074 | G0:0060255 | <1e-4 | s1r0742 | G0:0006753 | <1e-4 | s1r0250 | G0:0015293 | <1e-4 | s1r0907 | G0:0003824 | 0.4397 | s111414 | G0:0008324 | 0.0114 |
| ssr6083 | G0:0009165 | <1e-4 | ss17046 | G0:0071840 | <1e-4 | ss10350 | G0:0003674 | <1e-4 | s110448 | G0:0003824 | 0.4397 | ss11923 | G0:0008324 | 0.0114 |
| ssr7036 | G0:0044106 | <1e-4 | s111738 | G0:0072521 | <1e-4 | s1r1799 | G0:0060089 | <1e-4 | s111217 | G0:0003824 | 0.4397 | ss12471 | G0:0008324 | 0.0114 |
| s115097 | G0:0009165 | <1e-4 | ss10461 | G0:0009309 | <1e-4 | s1r0586 | G0:0015291 | <1e-4 | s117066 | G0:0003824 | 0.4397 | s110751 | G0:0008324 | 0.0114 |
| s1r5118 | G0:0009991 | <1e-4 | s1r0948 | G0:0048518 | <1e-4 | s110478 | G0:0022832 | <1e-4 | s1r1103 | G0:0003824 | 0.4397 | s1r1863 | G0:0008324 | 0.0114 |
| ss13379 | G0:0048518 | <1e-4 | s1r6009 | G0:0009309 | <1e-4 | s111373 | G0:0015291 | <1e-4 | s1r2032 | G0:0003824 | 0.4397 | s111273 | G0:0008324 | 0.0114 |
| s1r1593 | G0:0072522 | <1e-4 | s110756 | G0:0009309 | <1e-4 | s110242 | G0:0016853 | <1e-4 | s1r1568 | G0:0003824 | 0.4397 | s111222 | G0:0044237 | 0.0112 |
| s1r1419 | G0:0006163 | <1e-4 | s111504 | G0:0051188 | <1e-4 | s1r0664 | G0:0003674 | <1e-4 | s1r1864 | G0:0003824 | 0.4397 | ssr3154 | G0:0044237 | 0.0112 |
| s111054 | G0:0006091 | <1e-4 | ssr2787 | G0:0046128 | <1e-4 | s1r0453 | G0:0022890 | <1e-4 | s1r6073 | G0:0003824 | 0.4397 | s111528 | G0:0044237 | 0.0112 |
| s111630 | G0:0009056 | <1e-4 | s1r5017 | G0:0034641 | <1e-4 | s111495 | G0:0015267 | <1e-4 | s111162 | G0:0003824 | 0.4397 | s1r0108 | G0:0044237 | 0.0112 |
| s1r0610 | G0:0090304 | <1e-4 | s110218 | G0:0009892 | <1e-4 | s1r0459 | G0:0022892 | <1e-4 | ss12920 | G0:0003824 | 0.4397 | s111477 | G0:0044237 | 0.0112 |
| s1r1438 | G0:0009260 | <1e-4 | s1r5053 | G0:0006082 | <1e-4 | s1r0431 | G0:0015291 | <1e-4 | s1r1179 | G0:0003824 | 0.4397 | s111858 | G0:0008233 | 0.0111 |
| s1r1914 | G0:0050794 | <1e-4 | ssr2843 | G0:0019222 | <1e-4 | s110162 | G0:0016462 | <1e-4 | s110419 | G0:0003824 | 0.4397 | s110661 | G0:0008233 | 0.0111 |
| s110564 | G0:0006631 | <1e-4 | s111022 | G0:0051186 | <1e-4 | s111251 | G0:0015399 | <1e-4 | s1r1187 | G0:0003824 | 0.4397 | s1r1702 | G0:0008233 | 0.0111 |
| s111797 | G0:0010556 | <1e-4 | s1r0989 | G0:0034641 | <1e-4 | s1r0589 | G0:0043492 | <1e-4 | ss12471 | G0:0003824 | 0.4397 | ssr2843 | G0:0008233 | 0.0111 |
| s111272 | G0:0009991 | <1e-4 | s1r1162 | G0:0044282 | <1e-4 | s115004 | G0:0015293 | <1e-4 | ss12148 | G0:0003824 | 0.4397 | s111352 | G0:0006139 | 0.011  |
| s117089 | G0:0019222 | <1e-4 | s110762 | G0:0048522 | <1e-4 | s1r6065 | G0:0015075 | <1e-4 | s110369 | G0:0003824 | 0.4397 | s1r1668 | G0:0006139 | 0.011  |
| s110623 | G0:0042451 | <1e-4 | s110238 | G0:0044255 | <1e-4 | s1r1056 | G0:0016818 | <1e-4 | s110761 | G0:0003824 | 0.4397 | s1r1128 | G0:0006139 | 0.011  |
| s1r1406 | G0:0022607 | <1e-4 | s1r1990 | G0:0006066 | <1e-4 | s1r1677 | G0:0016818 | <1e-4 | s1r1104 | G0:0003824 | 0.4397 | s1r0232 | G0:0006139 | 0.011  |
| s1r1266 | G0:0051186 | <1e-4 | s1r1025 | G0:0009260 | <1e-4 | s1r2122 | G0:0016817 | <1e-4 | ssr5117 | G0:0003824 | 0.4397 | s110810 | G0:0006139 | 0.011  |
| s1r0111 | G0:0072524 | <1e-4 | ssr6026 | G0:0009308 | <1e-4 | s1r1660 | G0:0016818 | <1e-4 | s111203 | G0:0003824 | 0.4397 | s1r1070 | G0:0006139 | 0.011  |
| s111250 | G0:0018130 | <1e-4 | s1r1681 | G0:0048523 | <1e-4 | s1r0157 | G0:0043492 | <1e-4 | s111939 | G0:0003824 | 0.4397 | s110188 | G0:0006139 | 0.011  |
| s110984 | G0:0008150 | <1e-4 | s1r7096 | G0:0006721 | <1e-4 | s1r1677 | G0:0003674 | <1e-4 | s110775 | G0:0003824 | 0.4397 | s110449 | G0:0006139 | 0.011  |
| ssr2009 | G0:0050896 | <1e-4 | s1r7015 | G0:0006576 | <1e-4 | s1r1270 | G0:0016462 | <1e-4 | ss11923 | G0:0003824 | 0.4397 | s1r0801 | G0:0006139 | 0.011  |
| s110225 | G0:0006066 | <1e-4 | s110933 | G0:0008150 | <1e-4 | s1r1398 | G0:0015075 | <1e-4 | s1r2118 | G0:0003824 | 0.4397 | s110737 | G0:0006139 | 0.011  |
| s1r1260 | G0:0065007 | <1e-4 | ssr2972 | G0:0031323 | <1e-4 | s1r0059 | G0:0022891 | <1e-4 | s117043 | G0:0003824 | 0.4397 | s1r0456 | G0:0006139 | 0.011  |
| s1r0598 | G0:0042180 | <1e-4 | s111863 | G0:0031323 | <1e-4 | s1r1052 | G0:0016818 | <1e-4 | s111461 | G0:0003824 | 0.4397 | s1r0172 | G0:0006139 | 0.011  |
| s1r6088 | G0:0009987 | <1e-4 | s1r6106 | G0:0009260 | <1e-4 | s1r1674 | G0:0005342 | <1e-4 | s110167 | G0:0003824 | 0.4397 | s1r1303 | G0:0006139 | 0.011  |
| s110985 | G0:0044249 | <1e-4 | s110265 | G0:0010468 | <1e-4 | s117047 | G0:0016462 | <1e-4 | ss13379 | G0:0003824 | 0.4397 | ss10483 | G0:0006139 | 0.011  |
| s1r0723 | G0:0071840 | <1e-4 | s111659 | G0:0043648 | <1e-4 | s1r6104 | G0:0015267 | <1e-4 | s1r0195 | G0:0003824 | 0.4397 | s110911 | G0:0006139 | 0.011  |
| s110872 | G0:0031323 | <1e-4 | s1r0651 | G0:0006721 | <1e-4 | s110827 | G0:0015291 | <1e-4 | s110553 | G0:0003824 | 0.4397 | s1r1690 | G0:0006139 | 0.011  |
| ss16061 | G0:0046164 | <1e-4 | s111884 | G0:0031640 | <1e-4 | s1r1699 | G0:0022838 | <1e-4 | s1r6031 | G0:0003824 | 0.4397 | s1r1862 | G0:0006139 | 0.011  |
| s110172 | G0:0006721 | <1e-4 | ss12717 | G0:0009132 | <1e-4 | s1r1964 | G0:0022891 | <1e-4 | s110597 | G0:0003824 | 0.4397 | s111239 | G0:0006139 | 0.011  |
| s110659 | G0:0044106 | <1e-4 | s1r1116 | G0:0044283 | <1e-4 | s1r0702 | G0:0016462 | <1e-4 | s110802 | G0:0003824 | 0.4397 | s111654 | G0:0006139 | 0.011  |
| s1r1365 | G0:0006220 | <1e-4 | ssr6089 | G0:0034641 | <1e-4 | s1r0815 | G0:0042623 | <1e-4 | ssr0332 | G0:0003824 | 0.4397 | ssr2754 | G0:0006139 | 0.011  |
| s1r0238 | G0:0044281 | <1e-4 | s1r0264 | G0:0065007 | <1e-4 | ss11498 | G0:0016818 | <1e-4 | s117064 | G0:0003824 | 0.4397 | s110412 | G0:0006139 | 0.011  |
| s1r0468 | G0:0019222 | <1e-4 | s1r6104 | G0:0034641 | <1e-4 | s1r6073 | G0:0060089 | <1e-4 | s1r0142 | G0:0003824 | 0.4397 | s1r0272 | G0:0006139 | 0.011  |
| s1r1470 | G0:0072528 | <1e-4 | s110864 | G0:0055114 | <1e-4 | s110645 | G0:0015077 | <1e-4 | s115033 | G0:0003824 | 0.4397 | s111680 | G0:0006139 | 0.011  |
| s111586 | G0:0018130 | <1e-4 | s111652 | G0:0009263 | <1e-4 | s1r1468 | G0:0022838 | <1e-4 | s111306 | G0:0003824 | 0.4397 | s111173 | G0:0006139 | 0.011  |
| s1r0263 | G0:0048518 | <1e-4 | s110381 | G0:0043549 | <1e-4 | s1r1658 | G0:0042623 | <1e-4 | s1r1306 | G0:0003824 | 0.4397 | s111071 | G0:0006139 | 0.011  |
| s110265 | G0:0019752 | <1e-4 | s1r0553 | G0:0031326 | <1e-4 | ssr2802 | G0:0022836 | <1e-4 | s111163 | G0:0003824 | 0.4397 | s1r0053 | G0:0006139 | 0.011  |
| s1r0521 | G0:0009057 | <1e-4 | s1r0553 | G0:0071840 | <1e-4 | ss10109 | G0:0015405 | <1e-4 | s1r1218 | G0:0003824 | 0.4397 | s110225 | G0:0006139 | 0.011  |
| s1r1023 | G0:0071554 | <1e-4 | s111426 | G0:0006082 | <1e-4 | s1r1812 | G0:0022803 | <1e-4 | s110487 | G0:0003824 | 0.4397 | s1r0060 | G0:0006139 | 0.011  |
| ss16035 | G0:0009199 | <1e-4 | s1r1470 | G0:0044260 | <1e-4 | s1r1533 | G0:0005342 | <1e-4 | s1r0960 | G0:0003824 | 0.4397 | s1r0104 | G0:0006139 | 0.011  |
| s110781 | G0:0006576 | <1e-4 | s1r1767 | G0:0034641 | <1e-4 | s111601 | G0:0060089 | <1e-4 | s1r0264 | G0:0003824 | 0.4397 | s110752 | G0:0006139 | 0.011  |
| s111267 | G0:0034660 | <1e-4 | ssr5019 | G0:0031640 | <1e-4 | ss12733 | G0:0022890 | <1e-4 | s110994 | G0:0003824 | 0.4397 | s1r0112 | G0:0006139 | 0.011  |
| s1r0142 | G0:0016053 | <1e-4 | s1r2073 | G0:0046394 | <1e-4 | s1r1023 | G0:0022836 | <1e-4 | ss11792 | G0:0003824 | 0.4397 | s1r1259 | G0:0006139 | 0.011  |
| s1r2117 | G0:0009991 | <1e-4 | s111751 | G0:0048522 | <1e-4 | ss11520 | G0:0022890 | <1e-4 | s1r7083 | G0:0003824 | 0.4397 | s111240 | G0:0006139 | 0.011  |
| s1r1071 | G0:0019362 | <1e-4 | s111250 | G0:0034641 | <1e-4 | s1r5013 | G0:0015075 | <1e-4 | ss11464 | G0:0003824 | 0.4397 | s1r0650 | G0:0006139 | 0.011  |
| s1r1999 | G0:0006082 | <1e-4 | s111135 | G0:0008150 | <1e-4 | s1r1073 | G0:0060089 | <1e-4 | s117062 | G0:0003824 | 0.4397 | s1r0680 | G0:0006139 | 0.011  |
| ss15098 | G0:0051347 | <1e-4 | s110539 | G0:0065007 | <1e-4 | ss11972 | G0:0022857 | <1e-4 | s1r7015 | G0:0003824 | 0.4397 | s117065 | G0:0006139 | 0.011  |
| s1r1150 | G0:0034641 | <1e-4 | ss12749 | G0:0050794 | <1e-4 | s110763 | G0:0042623 | <1e-4 | s1r1276 | G0:0003824 | 0.4397 | s110319 | G0:0006139 | 0.011  |



|         |            |       |         |            |       |         |            |       |         |            |        |         |            |       |
|---------|------------|-------|---------|------------|-------|---------|------------|-------|---------|------------|--------|---------|------------|-------|
| slr1906 | G0:0005996 | <1e-4 | slr2092 | G0:0019222 | <1e-4 | slr1778 | G0:0015267 | <1e-4 | slr0145 | G0:0003824 | 0.4397 | ss13382 | G0:0006139 | 0.011 |
| sl10022 | G0:0055082 | <1e-4 | sl11722 | G0:0065007 | <1e-4 | ss12717 | G0:0008171 | <1e-4 | sl11378 | G0:0003824 | 0.4397 | slr1071 | G0:0006139 | 0.011 |
| sl17090 | G0:0051171 | <1e-4 | sl11006 | G0:0055086 | <1e-4 | sl10048 | G0:0016818 | <1e-4 | slr0655 | G0:0003824 | 0.4397 | sl10614 | G0:0006139 | 0.011 |
| ssr2142 | G0:0006733 | <1e-4 | ssr6078 | G0:0051171 | <1e-4 | slr1702 | G0:0016817 | <1e-4 | sl10473 | G0:0003824 | 0.4397 | sl10888 | G0:0006139 | 0.011 |
| slr0909 | G0:0019637 | <1e-4 | slr0810 | G0:0022607 | <1e-4 | sl11130 | G0:0015293 | <1e-4 | slr0598 | G0:0003824 | 0.4397 | slr2120 | G0:0006139 | 0.011 |
| slr1812 | G0:0031640 | <1e-4 | sl12013 | G0:0019362 | <1e-4 | slr0551 | G0:0022890 | <1e-4 | slr0038 | G0:0003824 | 0.4397 | slr1259 | G0:0016788 | 0.011 |
| sl11433 | G0:0006720 | <1e-4 | slr0852 | G0:0052188 | <1e-4 | slr0609 | G0:0015267 | <1e-4 | ssr1951 | G0:0003824 | 0.4397 | slr1493 | G0:0016788 | 0.011 |
| sl11737 | G0:0044255 | <1e-4 | sl10208 | G0:0051716 | <1e-4 | ssr5020 | G0:0016462 | <1e-4 | slr7080 | G0:0003824 | 0.4397 | sl10661 | G0:0016820 | 0.011 |
| slr1436 | G0:0071554 | <1e-4 | slr0609 | G0:0009889 | <1e-4 | ssr2067 | G0:0022857 | <1e-4 | slr1315 | G0:0003824 | 0.4397 | sl11399 | G0:0016788 | 0.011 |
| ss17045 | G0:0009991 | <1e-4 | sl10498 | G0:0019751 | <1e-4 | slr0975 | G0:0022832 | <1e-4 | slr0199 | G0:0003824 | 0.4397 | sl11730 | G0:0016788 | 0.011 |
| slr1365 | G0:0044260 | <1e-4 | sl10630 | G0:0044275 | <1e-4 | sl11186 | G0:0003674 | <1e-4 | ssr2317 | G0:0003824 | 0.4397 | sl11054 | G0:0016788 | 0.011 |
| sl10176 | G0:0006631 | <1e-4 | sl11926 | G0:0043412 | <1e-4 | sl11344 | G0:0015077 | <1e-4 | sl15032 | G0:0003824 | 0.4397 | slr0456 | G0:0016788 | 0.011 |
| slr5017 | G0:0090304 | <1e-4 | sl11906 | G0:0006091 | <1e-4 | slr1415 | G0:0016817 | <1e-4 | slr1419 | G0:0003824 | 0.4397 | sl10995 | G0:0016788 | 0.011 |
| sl10658 | G0:0048523 | <1e-4 | slr5102 | G0:0051234 | <1e-4 | sl10406 | G0:0016817 | <1e-4 | slr5116 | G0:0003824 | 0.4397 | sl11659 | G0:0016788 | 0.011 |
| ss15113 | G0:0043436 | <1e-4 | sl16053 | G0:0051179 | <1e-4 | ssr1768 | G0:0015405 | <1e-4 | slr0489 | G0:0003824 | 0.4397 | slr2048 | G0:0016788 | 0.011 |
| slr1800 | G0:0043549 | <1e-4 | slr5053 | G0:0043412 | <1e-4 | slr0519 | G0:0016462 | <1e-4 | ssr6079 | G0:0003824 | 0.4397 | slr0169 | G0:0016788 | 0.011 |
| slr0680 | G0:0009126 | <1e-4 | sl10272 | G0:0071554 | <1e-4 | sl11054 | G0:0016746 | <1e-4 | slr1069 | G0:0003824 | 0.4397 | slr1303 | G0:0016788 | 0.011 |
| ss18039 | G0:0051716 | <1e-4 | sl11002 | G0:0051347 | <1e-4 | sl10066 | G0:0008171 | <1e-4 | sl10102 | G0:0003824 | 0.4397 | sl11505 | G0:0016788 | 0.011 |
| slr0664 | G0:0009117 | <1e-4 | sl10488 | G0:0050801 | <1e-4 | sl10670 | G0:0022891 | <1e-4 | slr0912 | G0:0003824 | 0.4397 | sl11858 | G0:0016820 | 0.011 |
| sl17078 | G0:0006091 | <1e-4 | slr1753 | G0:0006753 | <1e-4 | slr1110 | G0:0022836 | <1e-4 | ss11972 | G0:0003824 | 0.4397 | slr0510 | G0:0016788 | 0.011 |
| ss16035 | G0:0022411 | <1e-4 | ssr2972 | G0:0044283 | <1e-4 | slr0740 | G0:0016741 | <1e-4 | slr1484 | G0:0003824 | 0.4397 | slr0060 | G0:0016788 | 0.011 |
| sl11447 | G0:0044260 | <1e-4 | slr1726 | G0:0001932 | <1e-4 | sl11751 | G0:0015293 | <1e-4 | slr7011 | G0:0003824 | 0.4397 | slr0468 | G0:0016788 | 0.011 |
| slr1674 | G0:0034654 | <1e-4 | ss10739 | G0:0055114 | <1e-4 | sl15033 | G0:0015293 | <1e-4 | slr1907 | G0:0003824 | 0.4397 | slr0935 | G0:0016788 | 0.011 |
| sl11476 | G0:0009263 | <1e-4 | sl10659 | G0:0043436 | <1e-4 | sl10678 | G0:0016817 | <1e-4 | sl18007 | G0:0003824 | 0.4397 | sl11072 | G0:0016788 | 0.011 |
| slr1070 | G0:0043549 | <1e-4 | slr0937 | G0:0009150 | <1e-4 | slr1162 | G0:0043167 | <1e-4 | sl11866 | G0:0003824 | 0.4397 | ss10483 | G0:0016788 | 0.011 |
| slr0149 | G0:0006753 | <1e-4 | sl10382 | G0:0009141 | <1e-4 | slr0765 | G0:0016817 | <1e-4 | slr6063 | G0:0003824 | 0.4397 | sl11267 | G0:0016788 | 0.011 |
| slr1788 | G0:0009892 | <1e-4 | slr0924 | G0:0009144 | <1e-4 | slr1163 | G0:0022890 | <1e-4 | slr2101 | G0:0003824 | 0.4397 | ssr2049 | G0:0016820 | 0.011 |
| slr1537 | G0:0019637 | <1e-4 | sl11350 | G0:0006066 | <1e-4 | ss11004 | G0:0043167 | <1e-4 | sl11766 | G0:0003824 | 0.4397 | slr1862 | G0:0016788 | 0.011 |
| slr6068 | G0:0072527 | <1e-4 | ssr7072 | G0:0044260 | <1e-4 | slr1667 | G0:0022803 | <1e-4 | ssr6046 | G0:0003824 | 0.4397 | sl11352 | G0:0016788 | 0.011 |
| ss15027 | G0:0006631 | <1e-4 | sl11307 | G0:0072527 | <1e-4 | sl15128 | G0:0015405 | <1e-4 | ssr1499 | G0:0003824 | 0.4397 | slr0373 | G0:0016788 | 0.011 |
| sl10732 | G0:0009259 | <1e-4 | sl10552 | G0:0022411 | <1e-4 | sl15097 | G0:0015075 | <1e-4 | sl11004 | G0:0003824 | 0.4397 | sl10871 | G0:0016788 | 0.011 |
| sl10843 | G0:0006766 | <1e-4 | sl11399 | G0:0009892 | <1e-4 | slr0285 | G0:0022892 | <1e-4 | sl10913 | G0:0003824 | 0.4397 | slr0924 | G0:0016788 | 0.011 |
| ssr2755 | G0:0009142 | <1e-4 | sl11372 | G0:0006220 | <1e-4 | ss17042 | G0:0016462 | <1e-4 | slr0148 | G0:0003824 | 0.4397 | slr1240 | G0:0016788 | 0.011 |
| slr1450 | G0:0006753 | <1e-4 | sl11651 | G0:0034660 | <1e-4 | ssr0759 | G0:0015291 | <1e-4 | slr1270 | G0:0003824 | 0.4397 | slr0605 | G0:0016788 | 0.011 |
| slr0366 | G0:0006091 | <1e-4 | sl10444 | G0:0006576 | <1e-4 | slr0455 | G0:0022891 | <1e-4 | slr1339 | G0:0003824 | 0.4397 | slr0455 | G0:0016788 | 0.011 |
| ssr1473 | G0:0009165 | <1e-4 | slr2070 | G0:0046164 | <1e-4 | slr1097 | G0:0005342 | <1e-4 | ss15095 | G0:0003824 | 0.4397 | slr2125 | G0:0016788 | 0.011 |
| slr1450 | G0:0006721 | <1e-4 | sl11240 | G0:0009991 | <1e-4 | sl11656 | G0:0022892 | <1e-4 | slr1068 | G0:0003824 | 0.4397 | slr0664 | G0:0016788 | 0.011 |
| sl10861 | G0:0051188 | <1e-4 | slr6064 | G0:0050789 | <1e-4 | ssr7084 | G0:0015291 | <1e-4 | sl11862 | G0:0003824 | 0.4397 | sl11040 | G0:0016788 | 0.011 |
| sl11570 | G0:0051818 | <1e-4 | slr1025 | G0:0055082 | <1e-4 | sl18019 | G0:0022838 | <1e-4 | sl10609 | G0:0003824 | 0.4397 | ssr2843 | G0:0016820 | 0.011 |
| sl10382 | G0:0044281 | <1e-4 | slr7083 | G0:0048878 | <1e-4 | ssr1114 | G0:0042623 | <1e-4 | slr5018 | G0:0003824 | 0.4397 | sl11660 | G0:0016788 | 0.011 |
| slr1444 | G0:0018130 | <1e-4 | sl11241 | G0:0033013 | <1e-4 | sl15026 | G0:0003674 | <1e-4 | slr1362 | G0:0003824 | 0.4397 | slr1940 | G0:0016788 | 0.011 |
| slr1340 | G0:0046394 | <1e-4 | sl11381 | G0:0044282 | <1e-4 | slr0848 | G0:0022891 | <1e-4 | sl10762 | G0:0003824 | 0.4397 | sl10810 | G0:0016788 | 0.011 |
| slr0038 | G0:0009308 | <1e-4 | slr1045 | G0:0019219 | <1e-4 | slr0937 | G0:0043492 | <1e-4 | slr7023 | G0:0003824 | 0.4397 | sl10911 | G0:0016788 | 0.011 |
| slr0625 | G0:0009262 | <1e-4 | slr1647 | G0:0051716 | <1e-4 | ssr6086 | G0:0022891 | <1e-4 | sl18004 | G0:0003824 | 0.4397 | slr0554 | G0:0016788 | 0.011 |
| slr1069 | G0:0072522 | <1e-4 | slr5102 | G0:0046128 | <1e-4 | ssr0335 | G0:0015405 | <1e-4 | slr5118 | G0:0003824 | 0.4397 | sl11225 | G0:0016788 | 0.011 |
| sl10372 | G0:0042451 | <1e-4 | slr5013 | G0:0009132 | <1e-4 | ssr5074 | G0:0022890 | <1e-4 | slr7025 | G0:0003824 | 0.4397 | sl11925 | G0:0016788 | 0.011 |
| slr2049 | G0:0006066 | <1e-4 | ssr0336 | G0:0009260 | <1e-4 | slr1194 | G0:0015293 | <1e-4 | slr0751 | G0:0003824 | 0.4397 | sl11201 | G0:0016788 | 0.011 |
| ssr5121 | G0:0055086 | <1e-4 | slr1541 | G0:0006576 | <1e-4 | slr7011 | G0:0022803 | <1e-4 | ssr2422 | G0:0003824 | 0.4397 | slr0981 | G0:0016788 | 0.011 |
| sl10609 | G0:0016053 | <1e-4 | sl11390 | G0:0008150 | <1e-4 | slr5037 | G0:0005342 | <1e-4 | sl15046 | G0:0003824 | 0.4397 | slr1070 | G0:0016788 | 0.011 |
| sl10149 | G0:0034641 | <1e-4 | sl11608 | G0:0072528 | <1e-4 | sl11940 | G0:0022857 | <1e-4 | sl11757 | G0:0003824 | 0.4397 | sl10623 | G0:0016788 | 0.011 |
| sl10590 | G0:0072524 | <1e-4 | sl11979 | G0:0009144 | <1e-4 | slr0923 | G0:0022803 | <1e-4 | ssr5120 | G0:0003824 | 0.4397 | sl10564 | G0:0016788 | 0.011 |
| slr6106 | G0:0019362 | <1e-4 | sl11512 | G0:0051246 | <1e-4 | ssr1256 | G0:0022832 | <1e-4 | slr1657 | G0:0003824 | 0.4397 | slr1074 | G0:0016788 | 0.011 |
| slr5053 | G0:0046128 | <1e-4 | slr6047 | G0:0006753 | <1e-4 | sl17078 | G0:0016817 | <1e-4 | slr1914 | G0:0003824 | 0.4397 | slr1827 | G0:0016788 | 0.011 |
| slr1726 | G0:0018130 | <1e-4 | slr6006 | G0:0009263 | <1e-4 | slr0605 | G0:0015399 | <1e-4 | ss18003 | G0:0003824 | 0.4397 | sl10572 | G0:0016788 | 0.011 |

|         |            |       |         |            |       |         |            |       |         |            |        |         |            |        |
|---------|------------|-------|---------|------------|-------|---------|------------|-------|---------|------------|--------|---------|------------|--------|
| s110765 | G0:0072524 | <1e-4 | ssl2920 | G0:0006766 | <1e-4 | slr0948 | G0:0015399 | <1e-4 | s111160 | G0:0003824 | 0.4397 | s110685 | G0:0016788 | 0.011  |
| s111024 | G0:0072521 | <1e-4 | slr0249 | G0:0043436 | <1e-4 | slr1152 | G0:0022838 | <1e-4 | slr0581 | G0:0003824 | 0.4397 | slr1676 | G0:0006139 | 0.0109 |
| s111388 | G0:0060255 | <1e-4 | slr0184 | G0:0006811 | <1e-4 | s110888 | G0:0060089 | <1e-4 | slr6005 | G0:0003824 | 0.4397 | s110216 | G0:0006139 | 0.0109 |
| slr1970 | G0:0051716 | <1e-4 | slr0810 | G0:0009057 | <1e-4 | slr0269 | G0:0022857 | <1e-4 | ssr2554 | G0:0003824 | 0.4397 | slr1266 | G0:0006139 | 0.0109 |
| s110498 | G0:0009126 | <1e-4 | slr1195 | G0:0051818 | <1e-4 | s111086 | G0:0022838 | <1e-4 | slr7016 | G0:0003824 | 0.4397 | s111949 | G0:0006139 | 0.0109 |
| slr0948 | G0:0044271 | <1e-4 | s110198 | G0:0055114 | <1e-4 | s110586 | G0:0016818 | <1e-4 | slr1547 | G0:0003824 | 0.4397 | slr1999 | G0:0006139 | 0.0109 |
| ssr6019 | G0:0009892 | <1e-4 | ssl5008 | G0:0090304 | <1e-4 | s110539 | G0:0043167 | <1e-4 | s110886 | G0:0003824 | 0.4397 | s110785 | G0:0006139 | 0.0109 |
| s111532 | G0:0009889 | <1e-4 | slr1847 | G0:0051186 | <1e-4 | s111318 | G0:0022892 | <1e-4 | slr7095 | G0:0003824 | 0.4397 | s111315 | G0:0006139 | 0.0109 |
| slr1429 | G0:0051716 | <1e-4 | slr0980 | G0:0031640 | <1e-4 | slr1800 | G0:0016462 | <1e-4 | slr0784 | G0:0003824 | 0.4397 | s110381 | G0:0006139 | 0.0109 |
| s110410 | G0:0034641 | <1e-4 | ssr1768 | G0:0044106 | <1e-4 | slr0149 | G0:0016746 | <1e-4 | ssr3341 | G0:0003824 | 0.4397 | slr0386 | G0:0006139 | 0.0109 |
| slr0489 | G0:0055086 | <1e-4 | slr0962 | G0:0044271 | <1e-4 | slr1573 | G0:0060089 | <1e-4 | s111252 | G0:0003824 | 0.4397 | s111954 | G0:0006139 | 0.0109 |
| s111775 | G0:0018130 | <1e-4 | slr1449 | G0:0044106 | <1e-4 | ssr2318 | G0:0043167 | <1e-4 | slr1768 | G0:0003824 | 0.4397 | s110066 | G0:0006139 | 0.0109 |
| slr5101 | G0:0072522 | <1e-4 | slr6088 | G0:0072528 | <1e-4 | slr0812 | G0:0015077 | <1e-4 | s110241 | G0:0003824 | 0.4397 | slr1618 | G0:0006139 | 0.0109 |
| ssr2803 | G0:0006220 | <1e-4 | slr1127 | G0:0009123 | <1e-4 | s110630 | G0:0022838 | <1e-4 | ss15007 | G0:0003824 | 0.4397 | ssr2439 | G0:0006139 | 0.0109 |
| slr1431 | G0:0009263 | <1e-4 | slr1303 | G0:0019222 | <1e-4 | slr1638 | G0:0016818 | <1e-4 | s110168 | G0:0003824 | 0.4397 | slr2144 | G0:0006139 | 0.0109 |
| s111307 | G0:0052111 | <1e-4 | s110595 | G0:0009124 | <1e-4 | s111925 | G0:0022891 | <1e-4 | s111348 | G0:0003824 | 0.4397 | slr0192 | G0:0006139 | 0.0109 |
| s110172 | G0:0009057 | <1e-4 | slr1053 | G0:0009987 | <1e-4 | slr1956 | G0:0016741 | <1e-4 | s110265 | G0:0003824 | 0.4397 | slr1275 | G0:0006139 | 0.0109 |
| slr1935 | G0:0006631 | <1e-4 | s111485 | G0:0031640 | <1e-4 | s110355 | G0:0015267 | <1e-4 | slr1397 | G0:0003824 | 0.4397 | s111613 | G0:0006139 | 0.0109 |
| s111609 | G0:0051818 | <1e-4 | s111660 | G0:0019752 | <1e-4 | s110547 | G0:0043167 | <1e-4 | s110293 | G0:0003824 | 0.4397 | s110309 | G0:0006139 | 0.0109 |
| s110630 | G0:0048522 | <1e-4 | s110994 | G0:0044106 | <1e-4 | s110732 | G0:0005342 | <1e-4 | slr0196 | G0:0003824 | 0.4397 | slr1117 | G0:0006139 | 0.0109 |
| slr0579 | G0:0016053 | <1e-4 | s110623 | G0:0050794 | <1e-4 | s110249 | G0:0016817 | <1e-4 | ss15045 | G0:0003824 | 0.4397 | s110456 | G0:0006139 | 0.0109 |
| s111882 | G0:0008150 | <1e-4 | ssr5106 | G0:0009889 | <1e-4 | slr0885 | G0:0022857 | <1e-4 | s110008 | G0:0003824 | 0.4397 | slr0404 | G0:0006139 | 0.0109 |
| slr0337 | G0:0031640 | <1e-4 | slr0930 | G0:0042180 | <1e-4 | slr7014 | G0:0022890 | <1e-4 | slr6013 | G0:0003824 | 0.4397 | s110703 | G0:0006139 | 0.0109 |
| slr5111 | G0:0009987 | <1e-4 | slr1438 | G0:0009142 | <1e-4 | s111654 | G0:0016462 | <1e-4 | ssr0102 | G0:0003824 | 0.4397 | slr0392 | G0:0006139 | 0.0109 |
| slr0006 | G0:0072527 | <1e-4 | s117087 | G0:0055086 | <1e-4 | slr0941 | G0:0022832 | <1e-4 | slr0440 | G0:0003824 | 0.4397 | s110191 | G0:0006139 | 0.0109 |
| s110505 | G0:0009126 | <1e-4 | slr1959 | G0:0009165 | <1e-4 | ssr2060 | G0:0015291 | <1e-4 | slr2010 | G0:0003824 | 0.4397 | slr1573 | G0:0006139 | 0.0109 |
| slr1074 | G0:0044248 | <1e-4 | slr1261 | G0:0009199 | <1e-4 | s110702 | G0:0022857 | <1e-4 | slr0890 | G0:0003824 | 0.4397 | slr2073 | G0:0006139 | 0.0109 |
| s110763 | G0:0072521 | <1e-4 | slr1152 | G0:0033013 | <1e-4 | slr0482 | G0:0022836 | <1e-4 | s110751 | G0:0003824 | 0.4397 | slr0921 | G0:0006139 | 0.0109 |
| s111763 | G0:0033013 | <1e-4 | s110216 | G0:0009991 | <1e-4 | slr0587 | G0:0008171 | <1e-4 | slr7097 | G0:0003824 | 0.4397 | s110982 | G0:0006139 | 0.0109 |
| s110611 | G0:0044106 | <1e-4 | slr1827 | G0:0006091 | <1e-4 | slr1677 | G0:0015075 | <1e-4 | slr1611 | G0:0003824 | 0.4397 | s112006 | G0:0015031 | 0.0108 |
| slr0269 | G0:0009150 | <1e-4 | s111830 | G0:0009132 | <1e-4 | s111062 | G0:0015077 | <1e-4 | s111510 | G0:0003824 | 0.4397 | s110382 | G0:0015031 | 0.0108 |
| sm10011 | G0:0051186 | <1e-4 | ssr1407 | G0:0009987 | <1e-4 | s110860 | G0:0016746 | <1e-4 | s111765 | G0:0003824 | 0.4397 | s111060 | G0:0015031 | 0.0108 |
| s110508 | G0:0006576 | <1e-4 | slr2018 | G0:0051716 | <1e-4 | slr0509 | G0:0016818 | <1e-4 | slr1534 | G0:0003824 | 0.4397 | s111586 | G0:0015031 | 0.0108 |
| slr0398 | G0:0055086 | <1e-4 | s110930 | G0:0009394 | <1e-4 | sg10001 | G0:0022891 | <1e-4 | slr0505 | G0:0003824 | 0.4397 | ssr2848 | G0:0015031 | 0.0108 |
| ssr0692 | G0:0006733 | <1e-4 | slr0273 | G0:0051234 | <1e-4 | slr2119 | G0:0022890 | <1e-4 | ss13383 | G0:0003824 | 0.4397 | slr1025 | G0:0015031 | 0.0108 |
| slr0872 | G0:0009260 | <1e-4 | ssl0353 | G0:0044106 | <1e-4 | slr2118 | G0:0042623 | <1e-4 | slr1342 | G0:0003824 | 0.4397 | slr0871 | G0:0015031 | 0.0108 |
| s110498 | G0:0051188 | <1e-4 | ssl2749 | G0:0044248 | <1e-4 | s110811 | G0:0015293 | <1e-4 | s110181 | G0:0003824 | 0.4397 | s111942 | G0:0015031 | 0.0108 |
| s111446 | G0:0016054 | <1e-4 | ssl3549 | G0:0043648 | <1e-4 | ssr7072 | G0:0022836 | <1e-4 | s115034 | G0:0003824 | 0.4397 | s110301 | G0:0015031 | 0.0108 |
| s110691 | G0:0019362 | <1e-4 | slr1862 | G0:0009889 | <1e-4 | slr1177 | G0:0005342 | <1e-4 | ss12009 | G0:0003824 | 0.4397 | s110096 | G0:0015031 | 0.0108 |
| s110198 | G0:0009889 | <1e-4 | slr0948 | G0:0071554 | <1e-4 | slr0172 | G0:0043492 | <1e-4 | slr0810 | G0:0008152 | 0.4357 | slr0876 | G0:0015031 | 0.0108 |
| s110932 | G0:0019751 | <1e-4 | slr1505 | G0:0019752 | <1e-4 | slr0111 | G0:0016746 | <1e-4 | slr0366 | G0:0008152 | 0.4357 | slr0423 | G0:0015031 | 0.0108 |
| slr0104 | G0:0043436 | <1e-4 | slr1152 | G0:0009199 | <1e-4 | s111965 | G0:0022832 | <1e-4 | slr1603 | G0:0008152 | 0.4357 | s110508 | G0:0015031 | 0.0108 |
| slr1194 | G0:0044255 | <1e-4 | slr2121 | G0:0006811 | <1e-4 | ssr6085 | G0:0015291 | <1e-4 | slr0208 | G0:0016020 | 0.424  | ss10787 | G0:0015031 | 0.0108 |
| slr1179 | G0:0051179 | <1e-4 | slr0552 | G0:0006721 | <1e-4 | slr1644 | G0:0015267 | <1e-4 | slr0848 | G0:0016020 | 0.424  | slr0243 | G0:0015031 | 0.0108 |
| ssr1528 | G0:0016053 | <1e-4 | s111424 | G0:0043436 | <1e-4 | s111086 | G0:0016818 | <1e-4 | slr1495 | G0:0016020 | 0.424  | slr1196 | G0:0015031 | 0.0108 |
| slr6047 | G0:0044255 | <1e-4 | ssl7038 | G0:0043412 | <1e-4 | s110742 | G0:0022892 | <1e-4 | s110286 | G0:0016020 | 0.424  | s110513 | G0:0015031 | 0.0108 |
| s110007 | G0:0008610 | <1e-4 | slr6031 | G0:0043549 | <1e-4 | s111089 | G0:0015075 | <1e-4 | slr1110 | G0:0016020 | 0.424  | ssr3532 | G0:0015031 | 0.0108 |
| slr0709 | G0:0043549 | <1e-4 | s110157 | G0:0043170 | <1e-4 | s110499 | G0:0016462 | <1e-4 | slr1565 | G0:0016020 | 0.424  | s111934 | G0:0015031 | 0.0108 |
| ss15113 | G0:0019222 | <1e-4 | ssl1918 | G0:0019222 | <1e-4 | s111166 | G0:0015399 | <1e-4 | slr0579 | G0:0016020 | 0.424  | slr1194 | G0:0015031 | 0.0108 |
| slr1911 | G0:0043549 | <1e-4 | s110710 | G0:0019222 | <1e-4 | slr1097 | G0:0003674 | <1e-4 | s110103 | G0:0016020 | 0.424  | s111913 | G0:0015031 | 0.0108 |
| slr0780 | G0:0016054 | <1e-4 | slr2018 | G0:0009057 | <1e-4 | s110763 | G0:0022836 | <1e-4 | ss13291 | G0:0016020 | 0.424  | slr0551 | G0:0015031 | 0.0108 |
| slr0708 | G0:0006066 | <1e-4 | slr1107 | G0:0043436 | <1e-4 | slr0386 | G0:0022892 | <1e-4 | slr0317 | G0:0016020 | 0.424  | slr1557 | G0:0015031 | 0.0108 |
| slr6074 | G0:0031326 | <1e-4 | slr1223 | G0:0031640 | <1e-4 | s110743 | G0:0016746 | <1e-4 | s110071 | G0:0016020 | 0.424  | s110068 | G0:0008168 | 0.0108 |
| s110181 | G0:0006082 | <1e-4 | slr0503 | G0:0031640 | <1e-4 | slr2073 | G0:0015075 | <1e-4 | slr1032 | G0:0016020 | 0.424  | s111119 | G0:0006259 | 0.0107 |

|         |            |       |         |            |       |         |            |       |         |            |        |         |            |        |
|---------|------------|-------|---------|------------|-------|---------|------------|-------|---------|------------|--------|---------|------------|--------|
| sl17064 | G0:0001932 | <1e-4 | sl11411 | G0:0031640 | <1e-4 | slr0386 | G0:0042623 | <1e-4 | ssr2781 | G0:0016020 | 0.424  | sl10325 | G0:0006396 | 0.0107 |
| slr1074 | G0:0051188 | <1e-4 | sl10743 | G0:0044283 | <1e-4 | sl11201 | G0:0022890 | <1e-4 | sl11912 | G0:0016020 | 0.424  | sl11912 | G0:0006259 | 0.0107 |
| sl10659 | G0:0016054 | <1e-4 | sl11315 | G0:0051347 | <1e-4 | slr7080 | G0:0022892 | <1e-4 | sl10272 | G0:0008152 | 0.4096 | sl10932 | G0:0006259 | 0.0107 |
| ss18039 | G0:0042180 | <1e-4 | slr6044 | G0:0048878 | <1e-4 | sl11654 | G0:0022838 | <1e-4 | sl10647 | G0:0008152 | 0.4096 | slr1572 | G0:0006396 | 0.0107 |
| slr0606 | G0:0044255 | <1e-4 | slr1170 | G0:0046164 | <1e-4 | sl17062 | G0:0016741 | <1e-4 | sl10702 | G0:0008152 | 0.4096 | slr1778 | G0:0006396 | 0.0107 |
| ssr2848 | G0:0019222 | <1e-4 | slr0380 | G0:0009057 | <1e-4 | slr1103 | G0:0015077 | <1e-4 | slr0442 | G0:0008152 | 0.4096 | slr1262 | G0:0006396 | 0.0107 |
| slr1572 | G0:0006753 | <1e-4 | sl10872 | G0:0051818 | <1e-4 | slr0890 | G0:0022892 | <1e-4 | ssr1258 | G0:0008152 | 0.4096 | sl10497 | G0:0006396 | 0.0107 |
| ss11417 | G0:0009199 | <1e-4 | sl11913 | G0:0009199 | <1e-4 | slr1307 | G0:0022891 | <1e-4 | slr0408 | G0:0008152 | 0.4096 | sl10269 | G0:0006259 | 0.0107 |
| sl10608 | G0:0022411 | <1e-4 | ss13382 | G0:0044271 | <1e-4 | sl10623 | G0:0015291 | <1e-4 | sl11424 | G0:0008152 | 0.4096 | sl10237 | G0:0006396 | 0.0107 |
| sl10703 | G0:0071842 | <1e-4 | sl11660 | G0:0071842 | <1e-4 | slr1681 | G0:0016818 | <1e-4 | sl10788 | G0:0016020 | 0.399  | sl11442 | G0:0006396 | 0.0107 |
| ss13383 | G0:0009057 | <1e-4 | sl10811 | G0:0048518 | <1e-4 | sl11906 | G0:0015405 | <1e-4 | sl10910 | G0:0016020 | 0.399  | slr1880 | G0:0006396 | 0.0107 |
| sl11233 | G0:0034641 | <1e-4 | slr0151 | G0:0044255 | <1e-4 | sl10558 | G0:0042623 | <1e-4 | slr1767 | G0:0016020 | 0.399  | slr0941 | G0:0006396 | 0.0107 |
| slr0801 | G0:0009889 | <1e-4 | slr1223 | G0:0046394 | <1e-4 | slr2011 | G0:0022838 | <1e-4 | slr1143 | G0:0016020 | 0.399  | slr0341 | G0:0006807 | 0.0106 |
| sl10735 | G0:0042180 | <1e-4 | ss12148 | G0:0044260 | <1e-4 | slr0058 | G0:0022892 | <1e-4 | ssr1391 | G0:0016020 | 0.399  | slr0810 | G0:0006807 | 0.0106 |
| slr6031 | G0:0019752 | <1e-4 | slr1472 | G0:0022411 | <1e-4 | sl15032 | G0:0015405 | <1e-4 | sl10505 | G0:0016020 | 0.399  | sl10596 | G0:0008324 | 0.0106 |
| ssr2009 | G0:0019752 | <1e-4 | ss17048 | G0:0043549 | <1e-4 | ssr2060 | G0:0022836 | <1e-4 | ss12996 | G0:0016020 | 0.399  | sl10354 | G0:0008324 | 0.0106 |
| ss11004 | G0:0006732 | <1e-4 | ss15098 | G0:0031640 | <1e-4 | sl10641 | G0:0016817 | <1e-4 | sl11562 | G0:0016020 | 0.399  | slr0503 | G0:0008324 | 0.0106 |
| slr1127 | G0:0031640 | <1e-4 | sl11049 | G0:0043170 | <1e-4 | slr0208 | G0:0016746 | <1e-4 | sl10558 | G0:0016020 | 0.399  | sl10996 | G0:0008324 | 0.0106 |
| slr1865 | G0:0031640 | <1e-4 | sl10314 | G0:0043933 | <1e-4 | sl11380 | G0:0022838 | <1e-4 | slr0990 | G0:0016020 | 0.399  | slr1107 | G0:0008324 | 0.0106 |
| slr0876 | G0:0034654 | <1e-4 | slr0341 | G0:0006811 | <1e-4 | slr1273 | G0:0022836 | <1e-4 | sl10183 | G0:0016020 | 0.399  | sl10864 | G0:0008324 | 0.0106 |
| slr0699 | G0:0009059 | <1e-4 | slr1266 | G0:0016052 | <1e-4 | slr1275 | G0:0042623 | <1e-4 | sl11526 | G0:0016020 | 0.399  | slr0076 | G0:0008324 | 0.0106 |
| slr1363 | G0:0019752 | <1e-4 | sl11485 | G0:0009059 | <1e-4 | ss10353 | G0:0016741 | <1e-4 | sl10192 | G0:0016020 | 0.399  | sl11472 | G0:0008324 | 0.0106 |
| sl10447 | G0:0044260 | <1e-4 | ss11377 | G0:0001932 | <1e-4 | ss10467 | G0:0015293 | <1e-4 | slr0589 | G0:0016020 | 0.399  | sl11455 | G0:0008324 | 0.0106 |
| slr6065 | G0:0033013 | <1e-4 | sl10787 | G0:0042451 | <1e-4 | sl10496 | G0:0008171 | <1e-4 | slr1906 | G0:0016020 | 0.399  | sl10283 | G0:0008324 | 0.0106 |
| sl11265 | G0:0052111 | <1e-4 | sl10839 | G0:0009394 | <1e-4 | slr1702 | G0:0015077 | <1e-4 | slr1301 | G0:0016020 | 0.399  | sl11174 | G0:0008324 | 0.0106 |
| sl11866 | G0:0051234 | <1e-4 | slr0935 | G0:0048519 | <1e-4 | sl11022 | G0:0015267 | <1e-4 | sl11643 | G0:0016020 | 0.399  | ssr3532 | G0:0008324 | 0.0106 |
| slr1235 | G0:0031640 | <1e-4 | slr1104 | G0:0048519 | <1e-4 | sl10176 | G0:0060089 | <1e-4 | ss12733 | G0:0016020 | 0.399  | slr0243 | G0:0008324 | 0.0106 |
| slr0142 | G0:0009124 | <1e-4 | slr0551 | G0:0009892 | <1e-4 | slr0625 | G0:0022857 | <1e-4 | ss10353 | G0:0016020 | 0.399  | sl10096 | G0:0008324 | 0.0106 |
| sl10524 | G0:0050896 | <1e-4 | ss15098 | G0:0009892 | <1e-4 | sl10743 | G0:0022803 | <1e-4 | sl11611 | G0:0016020 | 0.399  | slr0937 | G0:0008324 | 0.0106 |
| slr0196 | G0:0042180 | <1e-4 | ssr0332 | G0:0052111 | <1e-4 | slr1376 | G0:0022803 | <1e-4 | slr1847 | G0:0016020 | 0.399  | sl10424 | G0:0008324 | 0.0106 |
| slr1223 | G0:0009057 | <1e-4 | ssr3409 | G0:0019222 | <1e-4 | slr1557 | G0:0015405 | <1e-4 | slr1444 | G0:0016020 | 0.399  | ss10787 | G0:0008324 | 0.0106 |
| sl11009 | G0:0051179 | <1e-4 | slr0921 | G0:0034641 | <1e-4 | ssr2551 | G0:0015077 | <1e-4 | sl10732 | G0:0016020 | 0.399  | slr1196 | G0:0008324 | 0.0106 |
| slr1276 | G0:0006721 | <1e-4 | sl11832 | G0:0006733 | <1e-4 | sl11735 | G0:0016462 | <1e-4 | slr1726 | G0:0016020 | 0.399  | slr1391 | G0:0008324 | 0.0106 |
| slr1069 | G0:0006721 | <1e-4 | sl10854 | G0:0006753 | <1e-4 | slr2032 | G0:0022892 | <1e-4 | slr0978 | G0:0016020 | 0.399  | slr0476 | G0:0008324 | 0.0106 |
| slr0058 | G0:0034654 | <1e-4 | slr0104 | G0:0051186 | <1e-4 | slr1614 | G0:0015267 | <1e-4 | sl10022 | G0:0016020 | 0.399  | sl10547 | G0:0008324 | 0.0106 |
| slr6005 | G0:0009394 | <1e-4 | sl11979 | G0:0006811 | <1e-4 | slr0250 | G0:0022832 | <1e-4 | slr1047 | G0:0016020 | 0.399  | slr1505 | G0:0008324 | 0.0106 |
| sl10585 | G0:0006811 | <1e-4 | ss11464 | G0:0006631 | <1e-4 | slr1270 | G0:0016817 | <1e-4 | slr1799 | G0:0016020 | 0.3879 | ssr1375 | G0:0008324 | 0.0106 |
| sl17033 | G0:0071840 | <1e-4 | slr1223 | G0:0048518 | <1e-4 | slr0887 | G0:0016817 | <1e-4 | slr1045 | G0:0016020 | 0.3879 | sl11426 | G0:0008324 | 0.0106 |
| sl11372 | G0:0048518 | <1e-4 | sl11086 | G0:0006066 | <1e-4 | slr0386 | G0:0005342 | <1e-4 | slr0376 | G0:0016020 | 0.3879 | sl11942 | G0:0008324 | 0.0106 |
| slr6071 | G0:0019752 | <1e-4 | slr2000 | G0:0009059 | <1e-4 | sl10436 | G0:0016741 | <1e-4 | sl11218 | G0:0016020 | 0.3879 | sl10811 | G0:0006139 | 0.0105 |
| slr8022 | G0:0043170 | <1e-4 | slr0516 | G0:0033013 | <1e-4 | sl11486 | G0:0016817 | <1e-4 | sl11174 | G0:0016020 | 0.3879 | slr7097 | G0:0006139 | 0.0105 |
| slr1885 | G0:0044260 | <1e-4 | slr0810 | G0:0055114 | <1e-4 | sl11247 | G0:0015405 | <1e-4 | slr0423 | G0:0016020 | 0.3879 | sl10174 | G0:0006139 | 0.0105 |
| ssr3532 | G0:0016052 | <1e-4 | sl11068 | G0:0050801 | <1e-4 | slr7016 | G0:0015075 | <1e-4 | sl12006 | G0:0016020 | 0.3879 | slr1927 | G0:0006139 | 0.0105 |
| sl10423 | G0:0009057 | <1e-4 | sl10208 | G0:0044275 | <1e-4 | ss10832 | G0:0015267 | <1e-4 | slr1441 | G0:0016020 | 0.3879 | sl11510 | G0:0006139 | 0.0105 |
| sl11390 | G0:0022411 | <1e-4 | slr0664 | G0:0048518 | <1e-4 | slr0751 | G0:0022832 | <1e-4 | sl11586 | G0:0016020 | 0.3879 | sl10266 | G0:0006139 | 0.0105 |
| sl16055 | G0:0051716 | <1e-4 | slr1618 | G0:0009893 | <1e-4 | sl10498 | G0:0016818 | <1e-4 | slr0305 | G0:0016020 | 0.3879 | slr1104 | G0:0006139 | 0.0105 |
| sl11201 | G0:0009309 | <1e-4 | sl10905 | G0:0043436 | <1e-4 | slr1546 | G0:0043167 | <1e-4 | sl10382 | G0:0016020 | 0.3879 | sl10369 | G0:0006139 | 0.0105 |
| slr1407 | G0:0010468 | <1e-4 | slr0337 | G0:0006721 | <1e-4 | sl18027 | G0:0022803 | <1e-4 | sl10274 | G0:0016020 | 0.3879 | sl10860 | G0:0006139 | 0.0105 |
| sl10898 | G0:0043648 | <1e-4 | sl11130 | G0:0009126 | <1e-4 | slr7099 | G0:0043492 | <1e-4 | slr1519 | G0:0016020 | 0.3879 | sl11265 | G0:0006139 | 0.0105 |
| slr1495 | G0:0009141 | <1e-4 | sl10565 | G0:0043436 | <1e-4 | slr1914 | G0:0015293 | <1e-4 | slr0871 | G0:0016020 | 0.3879 | slr1600 | G0:0006139 | 0.0105 |
| ss10353 | G0:0009123 | <1e-4 | sl11527 | G0:0046907 | <1e-4 | slr1667 | G0:0015405 | <1e-4 | ss10787 | G0:0016020 | 0.3879 | slr1923 | G0:0006139 | 0.0105 |
| ssr5011 | G0:0044255 | <1e-4 | sl10283 | G0:0009117 | <1e-4 | sl10614 | G0:0022832 | <1e-4 | ssr1698 | G0:0016020 | 0.3879 | sl10913 | G0:0006139 | 0.0105 |
| sl18002 | G0:0051246 | <1e-4 | slr0609 | G0:0034660 | <1e-4 | ssr2787 | G0:0016741 | <1e-4 | sl11219 | G0:0016020 | 0.3879 | slr1340 | G0:0006139 | 0.0105 |
| slr0364 | G0:0044271 | <1e-4 | slr1034 | G0:0009161 | <1e-4 | sl10596 | G0:0022832 | <1e-4 | sl11601 | G0:0016020 | 0.3879 | slr1365 | G0:0006139 | 0.0105 |

|         |            |       |         |            |       |         |            |       |         |            |        |         |            |        |
|---------|------------|-------|---------|------------|-------|---------|------------|-------|---------|------------|--------|---------|------------|--------|
| slr1218 | G0:0031323 | <1e-4 | slr0146 | G0:0009263 | <1e-4 | slr6033 | G0:0016462 | <1e-4 | sl10301 | G0:0016020 | 0.3879 | slr1863 | G0:0006139 | 0.0105 |
| ssr2333 | G0:0071496 | <1e-4 | sl11265 | G0:0072522 | <1e-4 | sl17069 | G0:0015405 | <1e-4 | slr1127 | G0:0016020 | 0.3879 | sl10284 | G0:0006139 | 0.0105 |
| ssl3383 | G0:0019752 | <1e-4 | slr1095 | G0:0009889 | <1e-4 | slr1999 | G0:0016818 | <1e-4 | slr0209 | G0:0016020 | 0.3879 | sl10867 | G0:0006139 | 0.0105 |
| slr1270 | G0:0080090 | <1e-4 | sl15089 | G0:0009057 | <1e-4 | ssr1041 | G0:0016818 | <1e-4 | sl10513 | G0:0016020 | 0.3879 | slr1768 | G0:0006139 | 0.0105 |
| slr1287 | G0:0006066 | <1e-4 | sl12007 | G0:0006753 | <1e-4 | slr6104 | G0:0022857 | <1e-4 | sl11318 | G0:0016020 | 0.3879 | slr1068 | G0:0006139 | 0.0105 |
| ssr2611 | G0:0016054 | <1e-4 | ssl6035 | G0:0009987 | <1e-4 | sl10781 | G0:0022891 | <1e-4 | sl11186 | G0:0016020 | 0.3879 | sl10241 | G0:0006139 | 0.0105 |
| sl10102 | G0:0009056 | <1e-4 | sl11563 | G0:0031640 | <1e-4 | sl10047 | G0:0003674 | <1e-4 | slr0211 | G0:0016020 | 0.3879 | slr6074 | G0:0006139 | 0.0105 |
| ssr7036 | G0:0048519 | <1e-4 | sl10478 | G0:0016052 | <1e-4 | slr1668 | G0:0060089 | <1e-4 | sl10148 | G0:0016020 | 0.3879 | ss12420 | G0:0006139 | 0.0105 |
| sl11203 | G0:0051716 | <1e-4 | ssl2733 | G0:0016053 | <1e-4 | ssl1255 | G0:0015075 | <1e-4 | sl10996 | G0:0016020 | 0.3879 | slr5023 | G0:0006139 | 0.0105 |
| slr7091 | G0:0071840 | <1e-4 | sl15003 | G0:0048518 | <1e-4 | sl10775 | G0:0016818 | <1e-4 | sl10743 | G0:0016020 | 0.3879 | slr7101 | G0:0006139 | 0.0105 |
| slr0941 | G0:0022411 | <1e-4 | slr0144 | G0:0019751 | <1e-4 | slr0869 | G0:0015075 | <1e-4 | sl11135 | G0:0016020 | 0.3879 | slr6063 | G0:0006139 | 0.0105 |
| ssr2060 | G0:0071840 | <1e-4 | slr1812 | G0:0008150 | <1e-4 | sl11464 | G0:0022891 | <1e-4 | slr0476 | G0:0016020 | 0.3879 | slr1218 | G0:0006139 | 0.0105 |
| sl11681 | G0:0048522 | <1e-4 | ssr1041 | G0:0055086 | <1e-4 | sl11273 | G0:0016741 | <1e-4 | slr1917 | G0:0016020 | 0.3879 | slr1363 | G0:0006139 | 0.0105 |
| sl11217 | G0:0048878 | <1e-4 | ssr1114 | G0:0050794 | <1e-4 | sl11170 | G0:0015405 | <1e-4 | sl10547 | G0:0016020 | 0.3879 | slr6007 | G0:0006139 | 0.0105 |
| sl11911 | G0:0009308 | <1e-4 | slr1342 | G0:0009889 | <1e-4 | sl10183 | G0:0043167 | <1e-4 | slr0937 | G0:0016020 | 0.3879 | sl10553 | G0:0006139 | 0.0105 |
| slr1033 | G0:0009161 | <1e-4 | sl11757 | G0:0006766 | <1e-4 | ssr1425 | G0:0022832 | <1e-4 | slr1034 | G0:0016020 | 0.3879 | sl11022 | G0:0006139 | 0.0105 |
| slr0303 | G0:0009889 | <1e-4 | slr1932 | G0:0051818 | <1e-4 | slr0664 | G0:0022890 | <1e-4 | slr1066 | G0:0016020 | 0.3879 | sl10609 | G0:0006139 | 0.0105 |
| slr1376 | G0:0080090 | <1e-4 | slr1865 | G0:0055114 | <1e-4 | ssl1378 | G0:0022891 | <1e-4 | slr1376 | G0:0016020 | 0.3879 | sl11764 | G0:0006139 | 0.0105 |
| slr0551 | G0:0044260 | <1e-4 | sl11632 | G0:0009309 | <1e-4 | slr1762 | G0:0015077 | <1e-4 | sl11671 | G0:0016020 | 0.3879 | sl10168 | G0:0006139 | 0.0105 |
| slr1383 | G0:0022607 | <1e-4 | sl10066 | G0:0009056 | <1e-4 | slr0937 | G0:0016817 | <1e-4 | sl10296 | G0:0016020 | 0.3879 | slr0168 | G0:0006139 | 0.0105 |
| slr1407 | G0:0043436 | <1e-4 | sl11106 | G0:0016052 | <1e-4 | slr0654 | G0:0003674 | <1e-4 | sl10360 | G0:0016020 | 0.3879 | slr1162 | G0:0006139 | 0.0105 |
| slr1999 | G0:0044255 | <1e-4 | slr0374 | G0:0051234 | <1e-4 | sl11247 | G0:0015291 | <1e-4 | slr0787 | G0:0016020 | 0.3879 | sl10786 | G0:0006139 | 0.0105 |
| sl11477 | G0:0052188 | <1e-4 | slr0356 | G0:0006163 | <1e-4 | slr1964 | G0:0015267 | <1e-4 | sl10096 | G0:0016020 | 0.3879 | sl11638 | G0:0006139 | 0.0105 |
| slr1056 | G0:0046483 | <1e-4 | sl11024 | G0:0019219 | <1e-4 | sl10584 | G0:0043492 | <1e-4 | sl11512 | G0:0016020 | 0.3835 | sl11921 | G0:0006139 | 0.0105 |
| slr1258 | G0:0034654 | <1e-4 | sl10985 | G0:0006631 | <1e-4 | slr1927 | G0:0022857 | <1e-4 | slr0358 | G0:0016020 | 0.3835 | sl10930 | G0:0006139 | 0.0105 |
| slr0503 | G0:0009142 | <1e-4 | sl10354 | G0:0006793 | <1e-4 | slr0590 | G0:0015399 | <1e-4 | slr1070 | G0:0016020 | 0.3835 | ss15096 | G0:0006139 | 0.0105 |
| slr6022 | G0:0009057 | <1e-4 | slr1886 | G0:0050896 | <1e-4 | slr7023 | G0:0015267 | <1e-4 | slr0487 | G0:0016020 | 0.3835 | sl11773 | G0:0006139 | 0.0105 |
| slr0184 | G0:0006091 | <1e-4 | sl11511 | G0:0042451 | <1e-4 | slr1659 | G0:0016746 | <1e-4 | sl11240 | G0:0016020 | 0.3835 | slr1721 | G0:0006139 | 0.0105 |
| sl10394 | G0:0009262 | <1e-4 | slr2101 | G0:0044255 | <1e-4 | slr0989 | G0:0022857 | <1e-4 | sl10744 | G0:0016020 | 0.3835 | slr6080 | G0:0006139 | 0.0105 |
| slr0980 | G0:0009394 | <1e-4 | slr1104 | G0:0006576 | <1e-4 | sl10910 | G0:0003674 | <1e-4 | sl11251 | G0:0016020 | 0.3835 | sl18007 | G0:0006139 | 0.0105 |
| ssl2814 | G0:0044271 | <1e-4 | sl10008 | G0:0034641 | <1e-4 | sl10047 | G0:0022892 | <1e-4 | slr0930 | G0:0016020 | 0.3835 | slr1069 | G0:0006139 | 0.0105 |
| sl11769 | G0:0043648 | <1e-4 | slr2004 | G0:0043412 | <1e-4 | slr1068 | G0:0016818 | <1e-4 | sl11505 | G0:0016020 | 0.3835 | slr6101 | G0:0006139 | 0.0105 |
| sl11830 | G0:0010468 | <1e-4 | ssl1378 | G0:0009394 | <1e-4 | sl15044 | G0:0016817 | <1e-4 | sl10095 | G0:0016020 | 0.3835 | sl11092 | G0:0006139 | 0.0105 |
| sl10763 | G0:0043648 | <1e-4 | slr1546 | G0:0052111 | <1e-4 | slr0147 | G0:0022857 | <1e-4 | slr2048 | G0:0016020 | 0.3835 | slr7098 | G0:0006139 | 0.0105 |
| ssr1425 | G0:0019637 | <1e-4 | slr1263 | G0:0046394 | <1e-4 | slr2060 | G0:0015399 | <1e-4 | sl11054 | G0:0016020 | 0.3835 | slr1168 | G0:0006139 | 0.0105 |
| slr1270 | G0:0052111 | <1e-4 | sl10249 | G0:0090304 | <1e-4 | slr8021 | G0:0015405 | <1e-4 | ssr1528 | G0:0016020 | 0.3835 | slr6067 | G0:0006139 | 0.0105 |
| slr6072 | G0:0009260 | <1e-4 | ssl0352 | G0:0042451 | <1e-4 | slr0801 | G0:0022832 | <1e-4 | slr0962 | G0:0016020 | 0.3835 | slr0356 | G0:0006139 | 0.0105 |
| slr1406 | G0:0006721 | <1e-4 | slr1913 | G0:0022607 | <1e-4 | slr0708 | G0:0016817 | <1e-4 | slr0060 | G0:0016020 | 0.3835 | sl10853 | G0:0006139 | 0.0105 |
| sl11835 | G0:0052111 | <1e-4 | slr1206 | G0:0072528 | <1e-4 | sl11830 | G0:0015399 | <1e-4 | ssr1114 | G0:0016020 | 0.3835 | slr1407 | G0:0006139 | 0.0105 |
| slr0692 | G0:0050896 | <1e-4 | slr1568 | G0:0006066 | <1e-4 | sl11526 | G0:0016817 | <1e-4 | sl11582 | G0:0016020 | 0.3835 | sl11960 | G0:0006139 | 0.0105 |
| ssl2781 | G0:0044260 | <1e-4 | slr1940 | G0:0051179 | <1e-4 | sl10910 | G0:0060089 | <1e-4 | sl10410 | G0:0016020 | 0.3835 | slr1566 | G0:0006139 | 0.0105 |
| ssl1255 | G0:0016053 | <1e-4 | slr0364 | G0:0052188 | <1e-4 | sl11447 | G0:0042623 | <1e-4 | sl11399 | G0:0016020 | 0.3835 | sl10742 | G0:0006139 | 0.0105 |
| slr0579 | G0:0051818 | <1e-4 | sl10815 | G0:0044003 | <1e-4 | slr0890 | G0:0016741 | <1e-4 | slr2120 | G0:0016020 | 0.3835 | sl10857 | G0:0006139 | 0.0105 |
| slr0731 | G0:0044260 | <1e-4 | slr7057 | G0:0051171 | <1e-4 | sl11477 | G0:0003674 | <1e-4 | sl10997 | G0:0016020 | 0.3835 | slr1619 | G0:0006139 | 0.0105 |
| ssr6079 | G0:0006811 | <1e-4 | slr0594 | G0:0044260 | <1e-4 | sl11054 | G0:0015405 | <1e-4 | slr0468 | G0:0016020 | 0.3835 | slr0581 | G0:0006139 | 0.0105 |
| sl10443 | G0:0044106 | <1e-4 | slr5126 | G0:0016054 | <1e-4 | sl11681 | G0:0016462 | <1e-4 | slr0207 | G0:0016020 | 0.3835 | slr1534 | G0:0006139 | 0.0105 |
| slr1032 | G0:0008150 | <1e-4 | slr6087 | G0:0044282 | <1e-4 | slr1152 | G0:0008171 | <1e-4 | slr1658 | G0:0016020 | 0.3835 | slr1095 | G0:0006139 | 0.0105 |
| sl10284 | G0:0051347 | <1e-4 | sl10994 | G0:0009056 | <1e-4 | sl11293 | G0:0060089 | <1e-4 | sl10810 | G0:0016020 | 0.3835 | slr6064 | G0:0006139 | 0.0105 |
| slr1773 | G0:0006631 | <1e-4 | sl11251 | G0:0009141 | <1e-4 | slr0680 | G0:0022836 | <1e-4 | sl10188 | G0:0016020 | 0.3835 | slr0151 | G0:0006139 | 0.0105 |
| ssl2781 | G0:0016053 | <1e-4 | sl10615 | G0:0016054 | <1e-4 | sl11381 | G0:0015291 | <1e-4 | slr1493 | G0:0016020 | 0.3835 | sl15090 | G0:0006139 | 0.0105 |
| slr0313 | G0:0031326 | <1e-4 | sl10913 | G0:0071496 | <1e-4 | sl11273 | G0:0015267 | <1e-4 | sl10737 | G0:0016020 | 0.3835 | slr0489 | G0:0006139 | 0.0105 |
| slr5077 | G0:0046394 | <1e-4 | slr1940 | G0:0044275 | <1e-4 | slr0609 | G0:0015075 | <1e-4 | slr2125 | G0:0016020 | 0.3835 | sl10815 | G0:0006139 | 0.0105 |
| slr0431 | G0:0009308 | <1e-4 | slr0937 | G0:0043933 | <1e-4 | sl10497 | G0:0015405 | <1e-4 | sl11201 | G0:0016020 | 0.3835 | slr0964 | G0:0006139 | 0.0105 |
| slr0645 | G0:0071842 | <1e-4 | slr1425 | G0:0044255 | <1e-4 | slr1737 | G0:0016462 | <1e-4 | sl10602 | G0:0016020 | 0.3835 | slr6021 | G0:0006139 | 0.0105 |

|         |            |       |         |            |       |         |            |       |         |            |        |         |            |        |
|---------|------------|-------|---------|------------|-------|---------|------------|-------|---------|------------|--------|---------|------------|--------|
| slr0285 | G0:0009141 | <1e-4 | slr0241 | G0:0072524 | <1e-4 | sl10732 | G0:0043167 | <1e-4 | slr1122 | G0:0016020 | 0.3835 | slr1186 | G0:0006139 | 0.0105 |
| ssr0759 | G0:0019219 | <1e-4 | sl11939 | G0:0072527 | <1e-4 | ss15007 | G0:0016818 | <1e-4 | slr2080 | G0:0016020 | 0.3835 | slr5021 | G0:0006139 | 0.0105 |
| sl12006 | G0:0048519 | <1e-4 | sl11738 | G0:0006733 | <1e-4 | ss11300 | G0:0060089 | <1e-4 | sl10909 | G0:0016020 | 0.3835 | sl10293 | G0:0006139 | 0.0105 |
| ss17074 | G0:0071554 | <1e-4 | ss15007 | G0:0048878 | <1e-4 | sl10007 | G0:0003674 | <1e-4 | slr1303 | G0:0016020 | 0.3835 | slr1814 | G0:0006139 | 0.0105 |
| sl10072 | G0:0006066 | <1e-4 | slr1104 | G0:0046164 | <1e-4 | slr1073 | G0:0022892 | <1e-4 | sl10827 | G0:0016020 | 0.3835 | slr0148 | G0:0006139 | 0.0105 |
| slr0907 | G0:0034654 | <1e-4 | sl11241 | G0:0008150 | <1e-4 | sl11060 | G0:0022832 | <1e-4 | slr1762 | G0:0016020 | 0.3835 | slr1815 | G0:0006139 | 0.0105 |
| sl10446 | G0:0065007 | <1e-4 | sl11315 | G0:0071840 | <1e-4 | slr1474 | G0:0015293 | <1e-4 | sl10639 | G0:0016020 | 0.3835 | ssr2422 | G0:0006139 | 0.0105 |
| sl10298 | G0:0005996 | <1e-4 | slr1613 | G0:0009308 | <1e-4 | sl10608 | G0:0016741 | <1e-4 | slr0698 | G0:0016020 | 0.3835 | slr1397 | G0:0006139 | 0.0105 |
| sl11006 | G0:0009394 | <1e-4 | slr6090 | G0:0043436 | <1e-4 | sl11388 | G0:0016818 | <1e-4 | slr0729 | G0:0016020 | 0.3835 | sl10282 | G0:0006139 | 0.0105 |
| sl10661 | G0:0051818 | <1e-4 | sl15063 | G0:0006811 | <1e-4 | ss15108 | G0:0022803 | <1e-4 | slr0654 | G0:0016020 | 0.3835 | slr1179 | G0:0006139 | 0.0105 |
| slr1660 | G0:0009124 | <1e-4 | sl10149 | G0:0010556 | <1e-4 | slr1674 | G0:0022890 | <1e-4 | ss13177 | G0:0016020 | 0.3835 | slr7081 | G0:0006139 | 0.0105 |
| slr0509 | G0:0018130 | <1e-4 | slr1778 | G0:0009260 | <1e-4 | sl17063 | G0:0016817 | <1e-4 | sl11021 | G0:0016020 | 0.3835 | sl10218 | G0:0006139 | 0.0105 |
| slr0935 | G0:0055082 | <1e-4 | slr0400 | G0:0018130 | <1e-4 | sl11218 | G0:0015405 | <1e-4 | slr1590 | G0:0016020 | 0.3835 | slr0374 | G0:0006139 | 0.0105 |
| sl15047 | G0:0044260 | <1e-4 | ssr2998 | G0:0019751 | <1e-4 | ss17045 | G0:0005342 | <1e-4 | slr1668 | G0:0016020 | 0.3835 | sl17064 | G0:0006139 | 0.0105 |
| ssr5019 | G0:0006732 | <1e-4 | slr2012 | G0:0009117 | <1e-4 | slr1970 | G0:0015293 | <1e-4 | slr0112 | G0:0016020 | 0.3835 | sl11696 | G0:0006139 | 0.0105 |
| slr6081 | G0:0042455 | <1e-4 | sl11486 | G0:0051246 | <1e-4 | ss12245 | G0:0016462 | <1e-4 | slr1082 | G0:0016020 | 0.3835 | slr0769 | G0:0006139 | 0.0105 |
| sl11174 | G0:0009892 | <1e-4 | slr0489 | G0:0008610 | <1e-4 | sl10732 | G0:0015077 | <1e-4 | sl11170 | G0:0016020 | 0.3835 | sl10659 | G0:0006139 | 0.0105 |
| slr5126 | G0:0019222 | <1e-4 | sl10864 | G0:0019751 | <1e-4 | sl10419 | G0:0022838 | <1e-4 | sl11730 | G0:0016020 | 0.3835 | sl11160 | G0:0006139 | 0.0105 |
| sl10751 | G0:0052111 | <1e-4 | slr1875 | G0:0009260 | <1e-4 | slr0149 | G0:0015267 | <1e-4 | slr0742 | G0:0016020 | 0.3835 | slr1464 | G0:0006139 | 0.0105 |
| slr0664 | G0:0051818 | <1e-4 | sl11749 | G0:0045184 | <1e-4 | sl17067 | G0:0022891 | <1e-4 | sl11352 | G0:0016020 | 0.3835 | slr0442 | G0:0042626 | 0.0105 |
| ss16061 | G0:0009308 | <1e-4 | ssr3570 | G0:0006733 | <1e-4 | ssr7084 | G0:0022892 | <1e-4 | sl11411 | G0:0016020 | 0.3835 | slr1032 | G0:0042626 | 0.0105 |
| ssr0332 | G0:0006766 | <1e-4 | slr2084 | G0:0019219 | <1e-4 | sl11921 | G0:0003674 | <1e-4 | slr1840 | G0:0016020 | 0.3835 | ss10832 | G0:0042626 | 0.0105 |
| slr0569 | G0:0019222 | <1e-4 | slr5073 | G0:0009262 | <1e-4 | sl11054 | G0:0003674 | <1e-4 | sl11173 | G0:0016020 | 0.3835 | sl11902 | G0:0042626 | 0.0105 |
| slr1495 | G0:0055114 | <1e-4 | sl11151 | G0:0051171 | <1e-4 | slr6101 | G0:0015267 | <1e-4 | sl10669 | G0:0016020 | 0.3835 | ssr1256 | G0:0042626 | 0.0105 |
| slr0250 | G0:0031640 | <1e-4 | slr1362 | G0:0071496 | <1e-4 | sl10645 | G0:0008171 | <1e-4 | slr2115 | G0:0016020 | 0.3835 | slr0317 | G0:0042626 | 0.0105 |
| ssr2975 | G0:0042455 | <1e-4 | sl10588 | G0:0050789 | <1e-4 | sl11570 | G0:0015077 | <1e-4 | sl10319 | G0:0016020 | 0.3835 | ssr1258 | G0:0042626 | 0.0105 |
| sl10149 | G0:0006812 | <1e-4 | slr1195 | G0:0010556 | <1e-4 | sl11832 | G0:0022892 | <1e-4 | sl11956 | G0:0016020 | 0.3835 | sl11424 | G0:0042626 | 0.0105 |
| ss15007 | G0:0009126 | <1e-4 | sl11004 | G0:0019219 | <1e-4 | slr1676 | G0:0016462 | <1e-4 | slr1977 | G0:0016020 | 0.3835 | slr1495 | G0:0042626 | 0.0105 |
| slr6012 | G0:0072522 | <1e-4 | sl11638 | G0:0033013 | <1e-4 | slr0642 | G0:0022836 | <1e-4 | slr1071 | G0:0016020 | 0.3835 | sl10499 | G0:0006139 | 0.0104 |
| slr1429 | G0:0010556 | <1e-4 | sl11680 | G0:0010556 | <1e-4 | slr5112 | G0:0022891 | <1e-4 | slr0664 | G0:0016020 | 0.3835 | slr0480 | G0:0006139 | 0.0104 |
| sl10253 | G0:0044281 | <1e-4 | sl11250 | G0:0046164 | <1e-4 | sl11062 | G0:0005342 | <1e-4 | ss11045 | G0:0016020 | 0.3835 | slr1659 | G0:0006139 | 0.0104 |
| sl11858 | G0:0034660 | <1e-4 | sl10793 | G0:0046164 | <1e-4 | slr1259 | G0:0015405 | <1e-4 | slr1940 | G0:0016020 | 0.3835 | slr1896 | G0:0006139 | 0.0104 |
| sl11714 | G0:0042455 | <1e-4 | slr0362 | G0:0043170 | <1e-4 | sl11053 | G0:0015399 | <1e-4 | sl11072 | G0:0016020 | 0.3835 | slr1196 | G0:0006139 | 0.0104 |
| sl10669 | G0:0009144 | <1e-4 | slr1073 | G0:0046483 | <1e-4 | slr1306 | G0:0016462 | <1e-4 | sl10995 | G0:0016020 | 0.3835 | slr1045 | G0:0006139 | 0.0104 |
| slr6047 | G0:0044271 | <1e-4 | ss10483 | G0:0031326 | <1e-4 | sl11915 | G0:0022891 | <1e-4 | sl10981 | G0:0016020 | 0.3835 | sl11166 | G0:0006139 | 0.0104 |
| slr0610 | G0:0034660 | <1e-4 | slr6038 | G0:0031323 | <1e-4 | slr1474 | G0:0016818 | <1e-4 | slr0104 | G0:0016020 | 0.3835 | slr1107 | G0:0006139 | 0.0104 |
| sl10406 | G0:0009889 | <1e-4 | slr6038 | G0:0055114 | <1e-4 | slr0514 | G0:0022838 | <1e-4 | sl11925 | G0:0016020 | 0.3835 | sl11174 | G0:0006139 | 0.0104 |
| sl11399 | G0:0046164 | <1e-4 | ss12138 | G0:0044283 | <1e-4 | ssr3402 | G0:0043167 | <1e-4 | slr0318 | G0:0016020 | 0.3835 | sl10382 | G0:0006139 | 0.0104 |
| slr0872 | G0:0009126 | <1e-4 | ss10832 | G0:0019219 | <1e-4 | slr0334 | G0:0022891 | <1e-4 | slr0272 | G0:0016020 | 0.3835 | sl10447 | G0:0006139 | 0.0104 |
| ss15027 | G0:0006811 | <1e-4 | ss17046 | G0:0043170 | <1e-4 | sl11764 | G0:0016741 | <1e-4 | sl10832 | G0:0016020 | 0.3835 | ssr1375 | G0:0006139 | 0.0104 |
| slr7015 | G0:0051188 | <1e-4 | slr0517 | G0:0009141 | <1e-4 | slr1122 | G0:0016462 | <1e-4 | sl10590 | G0:0016020 | 0.3835 | sl10864 | G0:0006139 | 0.0104 |
| slr1927 | G0:0033013 | <1e-4 | sl11656 | G0:0043436 | <1e-4 | sl10148 | G0:0003674 | <1e-4 | sl10740 | G0:0016020 | 0.3835 | slr1023 | G0:0006139 | 0.0104 |
| sl10350 | G0:0009893 | <1e-4 | slr1127 | G0:0052188 | <1e-4 | slr6029 | G0:0015405 | <1e-4 | slr0373 | G0:0016020 | 0.3835 | sl10283 | G0:0006139 | 0.0104 |
| slr1034 | G0:0042180 | <1e-4 | sl10394 | G0:0042180 | <1e-4 | slr1437 | G0:0015291 | <1e-4 | slr0596 | G0:0016020 | 0.3835 | sl11135 | G0:0006139 | 0.0104 |
| slr1236 | G0:0006082 | <1e-4 | slr0890 | G0:0044003 | <1e-4 | slr1376 | G0:0015405 | <1e-4 | ss10483 | G0:0016020 | 0.3835 | sl11965 | G0:0015031 | 0.0103 |
| slr6009 | G0:0051716 | <1e-4 | sl18019 | G0:0072528 | <1e-4 | ssr2912 | G0:0016741 | <1e-4 | sl11344 | G0:0016020 | 0.3835 | ssr2551 | G0:0015031 | 0.0103 |
| slr0960 | G0:0009059 | <1e-4 | sl10552 | G0:0046164 | <1e-4 | ssr1425 | G0:0022891 | <1e-4 | sl11071 | G0:0016020 | 0.3835 | slr1203 | G0:0015031 | 0.0103 |
| slr0592 | G0:0009057 | <1e-4 | slr1911 | G0:0006720 | <1e-4 | sl11344 | G0:0060089 | <1e-4 | slr0702 | G0:0016020 | 0.3835 | slr1210 | G0:0015031 | 0.0103 |
| slr7099 | G0:0006066 | <1e-4 | slr1780 | G0:0009987 | <1e-4 | ssr3571 | G0:0043492 | <1e-4 | sl10843 | G0:0016020 | 0.3835 | sl10280 | G0:0015031 | 0.0103 |
| sl17086 | G0:0006082 | <1e-4 | sl17055 | G0:0033013 | <1e-4 | slr1396 | G0:0022891 | <1e-4 | slr2005 | G0:0016020 | 0.3835 | slr0913 | G0:0015031 | 0.0103 |
| ssr1766 | G0:0009141 | <1e-4 | sl11477 | G0:0034660 | <1e-4 | slr7024 | G0:0015267 | <1e-4 | slr0815 | G0:0016020 | 0.3835 | slr0392 | G0:0015031 | 0.0103 |
| slr0023 | G0:0005996 | <1e-4 | sl11188 | G0:0044248 | <1e-4 | sl10413 | G0:0022857 | <1e-4 | sl10451 | G0:0016020 | 0.3835 | slr1230 | G0:0015031 | 0.0103 |
| slr0326 | G0:0006576 | <1e-4 | slr1807 | G0:0044255 | <1e-4 | sl10793 | G0:0043167 | <1e-4 | sl11225 | G0:0016020 | 0.3835 | sl10023 | G0:0015031 | 0.0103 |
| sl10932 | G0:0051179 | <1e-4 | slr0651 | G0:0018130 | <1e-4 | sl16055 | G0:0022836 | <1e-4 | slr0605 | G0:0016020 | 0.3835 | slr1913 | G0:0015031 | 0.0103 |

|         |            |       |         |            |       |         |            |       |         |            |        |          |            |        |
|---------|------------|-------|---------|------------|-------|---------|------------|-------|---------|------------|--------|----------|------------|--------|
| sl10298 | G0:0009394 | <1e-4 | slr1276 | G0:0019219 | <1e-4 | slr0554 | G0:0022832 | <1e-4 | slr1664 | G0:0016020 | 0.3835 | ssr2615  | G0:0015031 | 0.0103 |
| sl10198 | G0:0051179 | <1e-4 | slr0364 | G0:0009144 | <1e-4 | sl17070 | G0:0015399 | <1e-4 | slr0924 | G0:0016020 | 0.3835 | sl11530  | G0:0015031 | 0.0103 |
| sl10085 | G0:0006091 | <1e-4 | sl18002 | G0:0022411 | <1e-4 | slr1261 | G0:0016817 | <1e-4 | slr0957 | G0:0016020 | 0.3835 | sl10237  | G0:0015031 | 0.0103 |
| slr1431 | G0:0009141 | <1e-4 | slr7096 | G0:0051186 | <1e-4 | slr5053 | G0:0043492 | <1e-4 | sl10752 | G0:0016020 | 0.3835 | slr1117  | G0:0015031 | 0.0103 |
| slr0601 | G0:0009126 | <1e-4 | ssl2781 | G0:0051186 | <1e-4 | ssl1263 | G0:0022857 | <1e-4 | slr0789 | G0:0016020 | 0.3835 | sl11315  | G0:0015031 | 0.0103 |
| sl11252 | G0:0080090 | <1e-4 | sl10703 | G0:0072527 | <1e-4 | slr1493 | G0:0016462 | <1e-4 | sl11304 | G0:0016020 | 0.3835 | slr0845  | G0:0015031 | 0.0103 |
| sl11671 | G0:0044106 | <1e-4 | ssl1792 | G0:0048522 | <1e-4 | sl11681 | G0:0022857 | <1e-4 | slr1209 | G0:0016020 | 0.3835 | sl10355  | G0:0015031 | 0.0103 |
| ssl6035 | G0:0050896 | <1e-4 | slr1444 | G0:0055082 | <1e-4 | ssl5113 | G0:0005342 | <1e-4 | slr0773 | G0:0016020 | 0.3835 | sl10265  | G0:0016788 | 0.0102 |
| slr6103 | G0:0008610 | <1e-4 | sl11348 | G0:0052111 | <1e-4 | sl10563 | G0:0043492 | <1e-4 | ssr1552 | G0:0016020 | 0.3835 | slr1363  | G0:0016788 | 0.0102 |
| slr0610 | G0:0019222 | <1e-4 | sl18019 | G0:0034654 | <1e-4 | sl11239 | G0:0022836 | <1e-4 | sl11938 | G0:0016020 | 0.3835 | ssr7017  | G0:0016874 | 0.0102 |
| sl11726 | G0:0009124 | <1e-4 | ssr1114 | G0:0072521 | <1e-4 | sl10237 | G0:0015399 | <1e-4 | slr1074 | G0:0016020 | 0.3835 | slr7083  | G0:0016788 | 0.0102 |
| sl11123 | G0:0008150 | <1e-4 | sl11680 | G0:0051171 | <1e-4 | sl10294 | G0:0022857 | <1e-4 | slr1033 | G0:0016020 | 0.3835 | sl10867  | G0:0016788 | 0.0102 |
| slr0959 | G0:0006091 | <1e-4 | slr2101 | G0:0006091 | <1e-4 | sl11752 | G0:0015267 | <1e-4 | slr1895 | G0:0016020 | 0.3835 | slr1270  | G0:0016788 | 0.0102 |
| slr1052 | G0:0090304 | <1e-4 | ssl2717 | G0:0043170 | <1e-4 | slr0680 | G0:0060089 | <1e-4 | slr1278 | G0:0016020 | 0.3835 | ssr2422  | G0:0016788 | 0.0102 |
| sl11006 | G0:0009126 | <1e-4 | slr1275 | G0:0010468 | <1e-4 | slr0957 | G0:0015399 | <1e-4 | sl10588 | G0:0016020 | 0.3835 | slr1980  | G0:0016874 | 0.0102 |
| ssr3410 | G0:0044283 | <1e-4 | slr1780 | G0:0051818 | <1e-4 | slr8044 | G0:0022891 | <1e-4 | sl10281 | G0:0016020 | 0.3835 | slr1449  | G0:0016874 | 0.0102 |
| ssr2615 | G0:0031323 | <1e-4 | sl10253 | G0:0046164 | <1e-4 | slr1128 | G0:0015075 | <1e-4 | slr0845 | G0:0016020 | 0.3733 | sl11447  | G0:0016788 | 0.0102 |
| slr2005 | G0:0009260 | <1e-4 | sl11455 | G0:0042455 | <1e-4 | slr0907 | G0:0016462 | <1e-4 | slr0921 | G0:0016020 | 0.3733 | sl10498  | G0:0016788 | 0.0102 |
| slr0232 | G0:0044106 | <1e-4 | slr7010 | G0:0009893 | <1e-4 | sl10661 | G0:0022890 | <1e-4 | slr1266 | G0:0016020 | 0.3733 | slr7057  | G0:0016874 | 0.0102 |
| slr1807 | G0:0072521 | <1e-4 | sl11155 | G0:0043170 | <1e-4 | slr1315 | G0:0022892 | <1e-4 | slr1081 | G0:0016020 | 0.3733 | slr2052  | G0:0016874 | 0.0102 |
| sl15032 | G0:0046483 | <1e-4 | slr1339 | G0:0043412 | <1e-4 | slr1980 | G0:0022892 | <1e-4 | slr0668 | G0:0016020 | 0.3733 | slr1507  | G0:0016874 | 0.0102 |
| slr5127 | G0:0043436 | <1e-4 | sl11477 | G0:0009394 | <1e-4 | sl11241 | G0:0015075 | <1e-4 | sl10023 | G0:0016020 | 0.3733 | ssl2781  | G0:0016788 | 0.0102 |
| slr0606 | G0:0071840 | <1e-4 | sl11399 | G0:0071554 | <1e-4 | ssr3122 | G0:0015293 | <1e-4 | slr0722 | G0:0016020 | 0.3733 | slr5119  | G0:0016788 | 0.0102 |
| slr0480 | G0:0006733 | <1e-4 | slr1920 | G0:0051188 | <1e-4 | sl10780 | G0:0022892 | <1e-4 | ssr3571 | G0:0016020 | 0.3733 | slr1116  | G0:0016788 | 0.0102 |
| ssr1256 | G0:0006091 | <1e-4 | sl11461 | G0:0009142 | <1e-4 | sl10102 | G0:0015075 | <1e-4 | sl10216 | G0:0016020 | 0.3733 | ssr0759  | G0:0016874 | 0.0102 |
| sl10552 | G0:0071496 | <1e-4 | slr0455 | G0:0050794 | <1e-4 | sl11691 | G0:0016741 | <1e-4 | slr1778 | G0:0016020 | 0.3733 | ssr2711  | G0:0016874 | 0.0102 |
| slr0199 | G0:0034654 | <1e-4 | sl11764 | G0:0006753 | <1e-4 | slr0232 | G0:0022836 | <1e-4 | sl11563 | G0:0016020 | 0.3733 | sl15067  | G0:0016874 | 0.0102 |
| sl10867 | G0:0051186 | <1e-4 | slr0491 | G0:0044003 | <1e-4 | sl11155 | G0:0015405 | <1e-4 | ssl2807 | G0:0016020 | 0.3733 | ssr1473  | G0:0016874 | 0.0102 |
| slr7016 | G0:0009165 | <1e-4 | slr7071 | G0:0006066 | <1e-4 | slr2117 | G0:0043167 | <1e-4 | sl11954 | G0:0016020 | 0.3733 | slr0582  | G0:0016874 | 0.0102 |
| sl11461 | G0:0009199 | <1e-4 | slr0356 | G0:0043436 | <1e-4 | ssl7042 | G0:0022890 | <1e-4 | slr1275 | G0:0016020 | 0.3733 | slr1396  | G0:0016874 | 0.0102 |
| ssl2384 | G0:0009263 | <1e-4 | slr0553 | G0:0090304 | <1e-4 | slr0104 | G0:0015293 | <1e-4 | slr0586 | G0:0016020 | 0.3733 | ssr6089  | G0:0016874 | 0.0102 |
| sl10487 | G0:0060255 | <1e-4 | sl11061 | G0:0044275 | <1e-4 | slr1187 | G0:0003674 | <1e-4 | slr0913 | G0:0016020 | 0.3733 | sl18004  | G0:0016788 | 0.0102 |
| slr0038 | G0:0006082 | <1e-4 | slr1168 | G0:0071842 | <1e-4 | ssl5100 | G0:0022832 | <1e-4 | slr0204 | G0:0016020 | 0.3733 | slr0816  | G0:0016874 | 0.0102 |
| slr0865 | G0:0055114 | <1e-4 | slr0108 | G0:0009987 | <1e-4 | ssr2551 | G0:0043167 | <1e-4 | sl10532 | G0:0016020 | 0.3733 | ssl8039  | G0:0016874 | 0.0102 |
| ssl3291 | G0:0044260 | <1e-4 | sl10048 | G0:0009260 | <1e-4 | sl10419 | G0:0043492 | <1e-4 | sl10066 | G0:0016020 | 0.3733 | sl10394  | G0:0016874 | 0.0102 |
| sl10843 | G0:0043412 | <1e-4 | sl15089 | G0:0044003 | <1e-4 | slr7081 | G0:0016746 | <1e-4 | sl10243 | G0:0016020 | 0.3733 | sl11131  | G0:0016874 | 0.0102 |
| slr1915 | G0:0009141 | <1e-4 | slr0545 | G0:0006811 | <1e-4 | ssl0832 | G0:0015291 | <1e-4 | slr2122 | G0:0016020 | 0.3733 | sl11163  | G0:0016788 | 0.0102 |
| sl10787 | G0:0043436 | <1e-4 | slr0179 | G0:0065007 | <1e-4 | sl10909 | G0:0015077 | <1e-4 | ssr2615 | G0:0016020 | 0.3733 | sl11203  | G0:0016788 | 0.0102 |
| sl18002 | G0:0071840 | <1e-4 | slr6004 | G0:0071840 | <1e-4 | sl10294 | G0:0003674 | <1e-4 | sl11965 | G0:0016020 | 0.3733 | sl11691  | G0:0016788 | 0.0102 |
| ssl1046 | G0:0051179 | <1e-4 | ssr6085 | G0:0046128 | <1e-4 | sl11486 | G0:0022892 | <1e-4 | sl11630 | G0:0016020 | 0.3733 | slr0453  | G0:0016874 | 0.0102 |
| sl10216 | G0:0009056 | <1e-4 | slr1612 | G0:0006766 | <1e-4 | ssl1552 | G0:0015405 | <1e-4 | sl11761 | G0:0016020 | 0.3733 | ssl1690  | G0:0016874 | 0.0102 |
| slr1600 | G0:0043412 | <1e-4 | sl15063 | G0:0051171 | <1e-4 | slr1327 | G0:0015399 | <1e-4 | slr0103 | G0:0016020 | 0.3733 | sl10913  | G0:0016788 | 0.0102 |
| sl18033 | G0:0055114 | <1e-4 | slr6038 | G0:0055082 | <1e-4 | sl10609 | G0:0022803 | <1e-4 | slr1117 | G0:0016020 | 0.3733 | ssl2069  | G0:0016874 | 0.0102 |
| ssr2843 | G0:0010468 | <1e-4 | sl17047 | G0:0046483 | <1e-4 | sl10185 | G0:0043167 | <1e-4 | slr0392 | G0:0016020 | 0.3733 | slr1813  | G0:0016788 | 0.0102 |
| sl10242 | G0:0006631 | <1e-4 | slr8021 | G0:0051716 | <1e-4 | slr7099 | G0:0015293 | <1e-4 | sl10944 | G0:0016020 | 0.3733 | sl11095  | G0:0016874 | 0.0102 |
| sl10191 | G0:0046483 | <1e-4 | slr0787 | G0:0022607 | <1e-4 | sl11735 | G0:0042623 | <1e-4 | sl11658 | G0:0016020 | 0.3733 | sl117043 | G0:0016788 | 0.0102 |
| sl10732 | G0:0009057 | <1e-4 | sl11193 | G0:0009165 | <1e-4 | sl18012 | G0:0043492 | <1e-4 | sl10414 | G0:0016020 | 0.3733 | ssr6083  | G0:0016874 | 0.0102 |
| slr0232 | G0:0006082 | <1e-4 | sl16055 | G0:0065007 | <1e-4 | slr1266 | G0:0022857 | <1e-4 | ssr3122 | G0:0016020 | 0.3733 | sl11891  | G0:0016874 | 0.0102 |
| sl10931 | G0:0009394 | <1e-4 | sl10335 | G0:0048523 | <1e-4 | slr1647 | G0:0060089 | <1e-4 | slr0050 | G0:0016020 | 0.3733 | sl11717  | G0:0016874 | 0.0102 |
| slr1681 | G0:0051716 | <1e-4 | ssl0350 | G0:0051818 | <1e-4 | sl15046 | G0:0042623 | <1e-4 | ssr2551 | G0:0016020 | 0.3733 | sl10609  | G0:0016788 | 0.0102 |
| slr0498 | G0:0044003 | <1e-4 | slr0545 | G0:0042180 | <1e-4 | slr1104 | G0:0015075 | <1e-4 | slr0431 | G0:0016020 | 0.3733 | sl11765  | G0:0016788 | 0.0102 |
| slr1852 | G0:0006811 | <1e-4 | sl10473 | G0:0065007 | <1e-4 | ssl5096 | G0:0022836 | <1e-4 | sl11830 | G0:0016020 | 0.3733 | slr7012  | G0:0016788 | 0.0102 |
| slr0496 | G0:0009199 | <1e-4 | slr0602 | G0:0050896 | <1e-4 | slr1935 | G0:0016817 | <1e-4 | sl10309 | G0:0016020 | 0.3733 | slr6028  | G0:0016874 | 0.0102 |
| ssl5091 | G0:0051186 | <1e-4 | slr2105 | G0:0034654 | <1e-4 | slr1419 | G0:0016817 | <1e-4 | ssr2439 | G0:0016020 | 0.3733 | sl11025  | G0:0016788 | 0.0102 |

|         |            |       |          |            |       |         |            |       |         |            |        |         |            |        |
|---------|------------|-------|----------|------------|-------|---------|------------|-------|---------|------------|--------|---------|------------|--------|
| sl10930 | G0:0090304 | <1e-4 | ssr6024  | G0:0034654 | <1e-4 | slr1262 | G0:0022803 | <1e-4 | slr1203 | G0:0016020 | 0.3733 | slr1174 | G0:0016874 | 0.0102 |
| sl11784 | G0:0016052 | <1e-4 | slr0300  | G0:0009889 | <1e-4 | slr1576 | G0:0022857 | <1e-4 | slr1676 | G0:0016020 | 0.3733 | sl10815 | G0:0016788 | 0.0102 |
| sl17077 | G0:0071841 | <1e-4 | slr2101  | G0:0048878 | <1e-4 | sl10047 | G0:0022836 | <1e-4 | sl10325 | G0:0016020 | 0.3733 | ssr0102 | G0:0016788 | 0.0102 |
| slr1600 | G0:0009123 | <1e-4 | ssl5007  | G0:0008150 | <1e-4 | slr2025 | G0:0016746 | <1e-4 | slr2073 | G0:0016020 | 0.3733 | slr5013 | G0:0016874 | 0.0102 |
| sl11054 | G0:0065007 | <1e-4 | slr1103  | G0:0050801 | <1e-4 | slr0771 | G0:0022832 | <1e-4 | sl11949 | G0:0016020 | 0.3733 | sl11510 | G0:0016788 | 0.0102 |
| slr6014 | G0:0042180 | <1e-4 | slr7010  | G0:0022411 | <1e-4 | slr0491 | G0:0022892 | <1e-4 | sl10191 | G0:0016020 | 0.3733 | ssl6035 | G0:0016874 | 0.0102 |
| slr0038 | G0:0071840 | <1e-4 | ssl7022  | G0:0042180 | <1e-4 | slr0654 | G0:0016741 | <1e-4 | slr1964 | G0:0016020 | 0.3733 | slr0780 | G0:0016874 | 0.0102 |
| slr0553 | G0:0006720 | <1e-4 | slr0146  | G0:0048518 | <1e-4 | sl10875 | G0:0022838 | <1e-4 | sl10355 | G0:0016020 | 0.3733 | slr6088 | G0:0016874 | 0.0102 |
| slr6006 | G0:0043549 | <1e-4 | ssr3410  | G0:0009142 | <1e-4 | slr0613 | G0:0016746 | <1e-4 | sl10198 | G0:0016020 | 0.3733 | slr0964 | G0:0016788 | 0.0102 |
| ssr6027 | G0:0055086 | <1e-4 | sl10069  | G0:0005996 | <1e-4 | sl10405 | G0:0022803 | <1e-4 | slr1788 | G0:0016020 | 0.3733 | sl10930 | G0:0016788 | 0.0102 |
| sgl0002 | G0:0044255 | <1e-4 | slr5116  | G0:0043436 | <1e-4 | sl10448 | G0:0043492 | <1e-4 | sl11086 | G0:0016020 | 0.3733 | ss10410 | G0:0016874 | 0.0102 |
| sl10564 | G0:0044003 | <1e-4 | sl10763  | G0:0050801 | <1e-4 | slr1957 | G0:0015267 | <1e-4 | slr1530 | G0:0016020 | 0.3733 | slr0325 | G0:0016874 | 0.0102 |
| ssl0738 | G0:0009199 | <1e-4 | slr7011  | G0:0034660 | <1e-4 | slr5012 | G0:0060089 | <1e-4 | slr0723 | G0:0016020 | 0.3733 | ssr1155 | G0:0016874 | 0.0102 |
| slr0168 | G0:0006091 | <1e-4 | sl11835  | G0:0051347 | <1e-4 | slr0619 | G0:0022836 | <1e-4 | sl11315 | G0:0016020 | 0.3733 | slr5073 | G0:0016874 | 0.0102 |
| slr0784 | G0:0043412 | <1e-4 | slr1547  | G0:0043436 | <1e-4 | slr0605 | G0:0016817 | <1e-4 | slr0658 | G0:0016020 | 0.3733 | ss17046 | G0:0016788 | 0.0102 |
| sl11241 | G0:0051171 | <1e-4 | slr0455  | G0:0044282 | <1e-4 | sl10284 | G0:0015077 | <1e-4 | sl11061 | G0:0016020 | 0.3733 | slr2004 | G0:0016874 | 0.0102 |
| slr0935 | G0:0006721 | <1e-4 | ssl1378  | G0:0043549 | <1e-4 | slr0455 | G0:0043167 | <1e-4 | slr1437 | G0:0016020 | 0.3733 | sl11396 | G0:0016788 | 0.0102 |
| ssl1514 | G0:0042180 | <1e-4 | slr1270  | G0:0006793 | <1e-4 | ssl0352 | G0:0022857 | <1e-4 | slr1572 | G0:0016020 | 0.3733 | sl11123 | G0:0016788 | 0.0102 |
| slr0250 | G0:0034660 | <1e-4 | slr1914  | G0:0019637 | <1e-4 | sl10218 | G0:0005342 | <1e-4 | sl10497 | G0:0016020 | 0.3733 | slr1425 | G0:0016874 | 0.0102 |
| slr0269 | G0:0006163 | <1e-4 | slr1383  | G0:0022411 | <1e-4 | slr1636 | G0:0022838 | <1e-4 | slr0872 | G0:0016020 | 0.3733 | slr0592 | G0:0016788 | 0.0102 |
| ssr6089 | G0:0009263 | <1e-4 | ssr3341  | G0:0043648 | <1e-4 | slr0453 | G0:0015267 | <1e-4 | slr1638 | G0:0016020 | 0.3733 | ss12138 | G0:0016874 | 0.0102 |
| slr6094 | G0:0016052 | <1e-4 | slr0592  | G0:0072524 | <1e-4 | slr1056 | G0:0022836 | <1e-4 | slr0294 | G0:0016020 | 0.3733 | slr2103 | G0:0016874 | 0.0102 |
| ss10483 | G0:0071842 | <1e-4 | sl11640  | G0:0006811 | <1e-4 | sl17033 | G0:0043167 | <1e-4 | slr2121 | G0:0016020 | 0.3733 | slr2117 | G0:0016874 | 0.0102 |
| slr0780 | G0:0051188 | <1e-4 | sl11862  | G0:0090304 | <1e-4 | sl11307 | G0:0003674 | <1e-4 | sl10524 | G0:0016020 | 0.3733 | ss15108 | G0:0016874 | 0.0102 |
| sl10241 | G0:0072527 | <1e-4 | slr6007  | G0:0019222 | <1e-4 | sl11252 | G0:0022890 | <1e-4 | slr0482 | G0:0016020 | 0.3733 | sl11785 | G0:0016874 | 0.0102 |
| sl11785 | G0:0016054 | <1e-4 | ssl0832  | G0:0048523 | <1e-4 | ssl1046 | G0:0015075 | <1e-4 | sl10982 | G0:0016020 | 0.3733 | sl15097 | G0:0016788 | 0.0102 |
| sl11222 | G0:0009987 | <1e-4 | slr0771  | G0:0016053 | <1e-4 | sl11510 | G0:0022891 | <1e-4 | slr1047 | G0:0008152 | 0.3653 | ssr0335 | G0:0016788 | 0.0102 |
| slr1530 | G0:0009059 | <1e-4 | slr1534  | G0:0080090 | <1e-4 | ssr2962 | G0:0016741 | <1e-4 | slr1143 | G0:0008152 | 0.3653 | sl11461 | G0:0016788 | 0.0102 |
| slr1082 | G0:0043436 | <1e-4 | slr1449  | G0:0051246 | <1e-4 | slr0456 | G0:0043167 | <1e-4 | sl10586 | G0:0008152 | 0.3653 | slr0505 | G0:0016788 | 0.0102 |
| slr0605 | G0:0006811 | <1e-4 | slr7094  | G0:0072527 | <1e-4 | slr0285 | G0:0016462 | <1e-4 | sl10183 | G0:0008152 | 0.3653 | slr6072 | G0:0016788 | 0.0102 |
| slr0581 | G0:0019752 | <1e-4 | slr1658  | G0:0048518 | <1e-4 | ss15008 | G0:0015077 | <1e-4 | slr0479 | G0:0008152 | 0.3653 | sl11609 | G0:0016874 | 0.0102 |
| sl10359 | G0:0009141 | <1e-4 | sl10284  | G0:0009123 | <1e-4 | sl11652 | G0:0015077 | <1e-4 | sl10783 | G0:0008152 | 0.3653 | sl10444 | G0:0016788 | 0.0102 |
| slr0755 | G0:0046164 | <1e-4 | slr1667  | G0:0009893 | <1e-4 | sl15061 | G0:0022832 | <1e-4 | sl10788 | G0:0008152 | 0.3653 | slr6068 | G0:0016874 | 0.0102 |
| ssr3410 | G0:0019222 | <1e-4 | sl11142  | G0:0042180 | <1e-4 | slr2005 | G0:0043492 | <1e-4 | sl11562 | G0:0008152 | 0.3653 | ss16092 | G0:0016874 | 0.0102 |
| slr0337 | G0:0044275 | <1e-4 | slr1940  | G0:0044260 | <1e-4 | sl11601 | G0:0022890 | <1e-4 | sl11611 | G0:0008152 | 0.3653 | sl11764 | G0:0016788 | 0.0102 |
| sl11400 | G0:0009132 | <1e-4 | slr0702  | G0:0009161 | <1e-4 | slr6073 | G0:0015077 | <1e-4 | sl10822 | G0:0008152 | 0.3653 | slr5012 | G0:0016874 | 0.0102 |
| slr2048 | G0:0051179 | <1e-4 | slr0013  | G0:0009262 | <1e-4 | sl11401 | G0:0015075 | <1e-4 | slr1865 | G0:0008152 | 0.3653 | sl11130 | G0:0016788 | 0.0102 |
| slr0907 | G0:0019637 | <1e-4 | slr7091  | G0:0009987 | <1e-4 | ssr1258 | G0:0005342 | <1e-4 | slr1444 | G0:0008152 | 0.3653 | slr0869 | G0:0016788 | 0.0102 |
| slr0586 | G0:0006721 | <1e-4 | ssl0312  | G0:0065007 | <1e-4 | slr0723 | G0:0016462 | <1e-4 | slr1800 | G0:0008152 | 0.3653 | slr5101 | G0:0016874 | 0.0102 |
| sl11634 | G0:0031640 | <1e-4 | sl11912  | G0:0044260 | <1e-4 | slr1406 | G0:0016817 | <1e-4 | sl11162 | G0:0016020 | 0.3576 | slr0145 | G0:0016788 | 0.0102 |
| slr1407 | G0:0046907 | <1e-4 | sl11752  | G0:0051347 | <1e-4 | ssr5074 | G0:0022836 | <1e-4 | slr0195 | G0:0016020 | 0.3576 | sl11882 | G0:0016874 | 0.0102 |
| slr1169 | G0:0001932 | <1e-4 | sl10572  | G0:0043436 | <1e-4 | ssl3615 | G0:0022857 | <1e-4 | sl10545 | G0:0016020 | 0.3576 | slr1104 | G0:0016788 | 0.0102 |
| sl11160 | G0:0044003 | <1e-4 | slr0287  | G0:0055082 | <1e-4 | ssl5098 | G0:0016741 | <1e-4 | sl10444 | G0:0016020 | 0.3576 | slr1472 | G0:0016788 | 0.0102 |
| sl11340 | G0:0055114 | <1e-4 | sl10752  | G0:0046483 | <1e-4 | slr0587 | G0:0015399 | <1e-4 | slr0912 | G0:0016020 | 0.3576 | ssr2060 | G0:0016874 | 0.0102 |
| sl11485 | G0:0006163 | <1e-4 | sl15006  | G0:0031326 | <1e-4 | sl11160 | G0:0016818 | <1e-4 | slr0601 | G0:0016020 | 0.3576 | sl10994 | G0:0016788 | 0.0102 |
| slr2071 | G0:0019637 | <1e-4 | slr1052  | G0:0016052 | <1e-4 | ssr0657 | G0:0016817 | <1e-4 | slr6007 | G0:0016020 | 0.3576 | ss12245 | G0:0016788 | 0.0102 |
| slr1576 | G0:0071840 | <1e-4 | ssl3451  | G0:0006091 | <1e-4 | slr1066 | G0:0022890 | <1e-4 | ssr2422 | G0:0016020 | 0.3576 | sl15044 | G0:0016788 | 0.0102 |
| slr0109 | G0:0050794 | <1e-4 | ssr1258  | G0:0046483 | <1e-4 | slr2119 | G0:0015267 | <1e-4 | slr1276 | G0:0016020 | 0.3576 | sl10563 | G0:0016874 | 0.0102 |
| slr0509 | G0:0055082 | <1e-4 | ssr1391  | G0:0006091 | <1e-4 | slr5102 | G0:0022838 | <1e-4 | slr1168 | G0:0016020 | 0.3576 | slr0590 | G0:0016874 | 0.0102 |
| slr0060 | G0:0006811 | <1e-4 | slr0784  | G0:0072524 | <1e-4 | slr5126 | G0:0022838 | <1e-4 | sl11509 | G0:0016020 | 0.3576 | slr0751 | G0:0016788 | 0.0102 |
| sl10369 | G0:0009132 | <1e-4 | sl118027 | G0:0033013 | <1e-4 | slr1222 | G0:0022891 | <1e-4 | sl18007 | G0:0016020 | 0.3576 | ss11918 | G0:0016874 | 0.0102 |
| sl15046 | G0:0065007 | <1e-4 | ssl2138  | G0:0034654 | <1e-4 | slr0232 | G0:0022892 | <1e-4 | slr2032 | G0:0016020 | 0.3576 | ssr1499 | G0:0016788 | 0.0102 |
| slr0060 | G0:0034654 | <1e-4 | slr6033  | G0:0009987 | <1e-4 | slr0157 | G0:0022892 | <1e-4 | sgl0002 | G0:0016020 | 0.3576 | slr6031 | G0:0016788 | 0.0102 |
| sl10297 | G0:0019362 | <1e-4 | ssr2067  | G0:0043436 | <1e-4 | slr7015 | G0:0042623 | <1e-4 | slr0110 | G0:0016020 | 0.3576 | slr2010 | G0:0016788 | 0.0102 |

|         |            |       |         |            |       |         |            |       |         |            |        |         |            |        |
|---------|------------|-------|---------|------------|-------|---------|------------|-------|---------|------------|--------|---------|------------|--------|
| sl15047 | G0:0008150 | <1e-4 | slr1444 | G0:0046483 | <1e-4 | ssr2142 | G0:0016462 | <1e-4 | slr0806 | G0:0016020 | 0.3576 | sl10479 | G0:0016874 | 0.0102 |
| sl10751 | G0:0010468 | <1e-4 | slr2121 | G0:0048519 | <1e-4 | sl10183 | G0:0003674 | <1e-4 | slr1907 | G0:0016020 | 0.3576 | sl17078 | G0:0016874 | 0.0102 |
| ssr6002 | G0:0048878 | <1e-4 | ssl2781 | G0:0019222 | <1e-4 | sl10192 | G0:0043167 | <1e-4 | sl10441 | G0:0016020 | 0.3576 | slr7081 | G0:0016788 | 0.0102 |
| sl10423 | G0:0048519 | <1e-4 | sl12013 | G0:0009889 | <1e-4 | sl10815 | G0:0008171 | <1e-4 | slr2118 | G0:0016020 | 0.3576 | sl10863 | G0:0016788 | 0.0102 |
| slr1599 | G0:0051171 | <1e-4 | slr0670 | G0:0050801 | <1e-4 | slr1470 | G0:0022832 | <1e-4 | sl10860 | G0:0016020 | 0.3576 | ss12162 | G0:0016874 | 0.0102 |
| sl10282 | G0:0009056 | <1e-4 | slr0890 | G0:0048523 | <1e-4 | slr0921 | G0:0022890 | <1e-4 | ss15007 | G0:0016020 | 0.3576 | sl15003 | G0:0016874 | 0.0102 |
| sl11273 | G0:0090304 | <1e-4 | sl10253 | G0:0051818 | <1e-4 | slr1362 | G0:0042623 | <1e-4 | sl10611 | G0:0016020 | 0.3576 | ss18028 | G0:0016874 | 0.0102 |
| slr1288 | G0:0009893 | <1e-4 | slr0317 | G0:0050794 | <1e-4 | sl11912 | G0:0022803 | <1e-4 | sl10775 | G0:0016020 | 0.3576 | sl11380 | G0:0016874 | 0.0102 |
| sl11272 | G0:0008150 | <1e-4 | slr0989 | G0:0022411 | <1e-4 | sl10656 | G0:0043167 | <1e-4 | slr1362 | G0:0016020 | 0.3576 | ss12920 | G0:0016788 | 0.0102 |
| slr5073 | G0:0009144 | <1e-4 | slr1174 | G0:0009059 | <1e-4 | ssr6085 | G0:0005342 | <1e-4 | sl10751 | G0:0016020 | 0.3576 | slr1276 | G0:0016788 | 0.0102 |
| sl10022 | G0:0050789 | <1e-4 | slr0023 | G0:0009126 | <1e-4 | slr0053 | G0:0015077 | <1e-4 | sl17063 | G0:0016020 | 0.3576 | sl17087 | G0:0016874 | 0.0102 |
| slr2084 | G0:0043436 | <1e-4 | sl10280 | G0:0051186 | <1e-4 | sl11002 | G0:0005342 | <1e-4 | sl10553 | G0:0016020 | 0.3576 | sl11024 | G0:0016874 | 0.0102 |
| sl10602 | G0:0009142 | <1e-4 | sl10243 | G0:0046483 | <1e-4 | ssr1552 | G0:0015291 | <1e-4 | slr0407 | G0:0016020 | 0.3576 | ss15008 | G0:0016874 | 0.0102 |
| ssr2803 | G0:0006066 | <1e-4 | ssr2551 | G0:0051179 | <1e-4 | ss15113 | G0:0015399 | <1e-4 | slr1150 | G0:0016020 | 0.3576 | slr7095 | G0:0016788 | 0.0102 |
| sl11135 | G0:0009132 | <1e-4 | slr1025 | G0:0071842 | <1e-4 | slr1789 | G0:0022892 | <1e-4 | slr1923 | G0:0016020 | 0.3576 | ssr0109 | G0:0016874 | 0.0102 |
| sl11912 | G0:0071496 | <1e-4 | ssr3572 | G0:0031326 | <1e-4 | sl10413 | G0:0016462 | <1e-4 | sl11025 | G0:0016020 | 0.3576 | sl10802 | G0:0016788 | 0.0102 |
| ssr0335 | G0:0055114 | <1e-4 | slr0345 | G0:0034654 | <1e-4 | ssr3532 | G0:0016746 | <1e-4 | sl10406 | G0:0016020 | 0.3576 | sl10984 | G0:0016874 | 0.0102 |
| sl10837 | G0:0005996 | <1e-4 | slr1472 | G0:0009141 | <1e-4 | sl11396 | G0:0022892 | <1e-4 | ss12009 | G0:0016020 | 0.3576 | slr2118 | G0:0016788 | 0.0102 |
| sl11219 | G0:0006720 | <1e-4 | sl10996 | G0:0051188 | <1e-4 | slr0196 | G0:0015399 | <1e-4 | slr1306 | G0:0016020 | 0.3576 | sl10008 | G0:0016788 | 0.0102 |
| slr1398 | G0:0048518 | <1e-4 | sl11882 | G0:0006721 | <1e-4 | slr1384 | G0:0016462 | <1e-4 | sl11504 | G0:0016020 | 0.3576 | ss17051 | G0:0016874 | 0.0102 |
| slr0023 | G0:0051171 | <1e-4 | slr1530 | G0:0006091 | <1e-4 | sl10696 | G0:0008171 | <1e-4 | slr7012 | G0:0016020 | 0.3576 | sl18007 | G0:0016788 | 0.0102 |
| slr0613 | G0:0090304 | <1e-4 | ssl0410 | G0:0006631 | <1e-4 | sl10060 | G0:0016741 | <1e-4 | slr6006 | G0:0016020 | 0.3576 | sl11652 | G0:0016874 | 0.0102 |
| slr1128 | G0:0043412 | <1e-4 | sl11913 | G0:0072521 | <1e-4 | slr6101 | G0:0016818 | <1e-4 | slr6074 | G0:0016020 | 0.3576 | sl10552 | G0:0016874 | 0.0102 |
| sl11749 | G0:0071840 | <1e-4 | sl11472 | G0:0048518 | <1e-4 | ss18008 | G0:0016817 | <1e-4 | slr1187 | G0:0016020 | 0.3576 | slr7011 | G0:0016788 | 0.0102 |
| sl12006 | G0:0071841 | <1e-4 | slr1601 | G0:0071496 | <1e-4 | slr0589 | G0:0016746 | <1e-4 | slr6031 | G0:0016020 | 0.3576 | sl11681 | G0:0016874 | 0.0102 |
| ssr6062 | G0:0051186 | <1e-4 | sl17055 | G0:0044282 | <1e-4 | slr1103 | G0:0015405 | <1e-4 | sl10181 | G0:0016020 | 0.3576 | slr0300 | G0:0016874 | 0.0102 |
| slr1464 | G0:0034654 | <1e-4 | slr0865 | G0:0072524 | <1e-4 | slr6073 | G0:0016462 | <1e-4 | slr7058 | G0:0016020 | 0.3576 | slr1187 | G0:0016788 | 0.0102 |
| sl11359 | G0:0043933 | <1e-4 | ssl2138 | G0:0042451 | <1e-4 | sl10253 | G0:0008171 | <1e-4 | sl10659 | G0:0016020 | 0.3576 | slr1186 | G0:0016788 | 0.0102 |
| sl10098 | G0:0016052 | <1e-4 | sl10156 | G0:0046907 | <1e-4 | ss15045 | G0:0060089 | <1e-4 | sl15033 | G0:0016020 | 0.3576 | ss12814 | G0:0016874 | 0.0102 |
| sl17063 | G0:0043549 | <1e-4 | slr7057 | G0:0050896 | <1e-4 | sl11726 | G0:0016818 | <1e-4 | sl17066 | G0:0016020 | 0.3576 | slr6016 | G0:0016874 | 0.0102 |
| sl10756 | G0:0065007 | <1e-4 | sl10623 | G0:0009892 | <1e-4 | sl11606 | G0:0016817 | <1e-4 | slr1535 | G0:0016020 | 0.3576 | ss15098 | G0:0016788 | 0.0102 |
| slr5102 | G0:0009394 | <1e-4 | slr1753 | G0:0009126 | <1e-4 | ss10788 | G0:0022836 | <1e-4 | sl10448 | G0:0016020 | 0.3576 | ss12717 | G0:0016788 | 0.0102 |
| slr0552 | G0:0055086 | <1e-4 | sl10444 | G0:0006220 | <1e-4 | slr0959 | G0:0016817 | <1e-4 | slr1534 | G0:0016020 | 0.3576 | ss17045 | G0:0016874 | 0.0102 |
| ss15113 | G0:0009987 | <1e-4 | sl11532 | G0:0042180 | <1e-4 | sl11749 | G0:0015267 | <1e-4 | slr5021 | G0:0016020 | 0.3576 | slr5087 | G0:0016874 | 0.0102 |
| sl10376 | G0:0051818 | <1e-4 | sl11151 | G0:0009308 | <1e-4 | sl11834 | G0:0043167 | <1e-4 | slr7082 | G0:0016020 | 0.3576 | sl17047 | G0:0016788 | 0.0102 |
| slr0408 | G0:0006793 | <1e-4 | slr5126 | G0:0009144 | <1e-4 | slr6016 | G0:0022836 | <1e-4 | sl18033 | G0:0016020 | 0.3576 | sl10846 | G0:0016788 | 0.0102 |
| sl17047 | G0:0043549 | <1e-4 | sl11773 | G0:0009057 | <1e-4 | sl11505 | G0:0015291 | <1e-4 | sl10397 | G0:0016020 | 0.3576 | sl11092 | G0:0016788 | 0.0102 |
| sl12006 | G0:0043170 | <1e-4 | slr7071 | G0:0009057 | <1e-4 | slr0708 | G0:0015075 | <1e-4 | ss18003 | G0:0016020 | 0.3576 | slr1378 | G0:0016788 | 0.0102 |
| sm10011 | G0:0042455 | <1e-4 | slr2049 | G0:0048878 | <1e-4 | sl10588 | G0:0015293 | <1e-4 | slr6080 | G0:0016020 | 0.3576 | sl10162 | G0:0016874 | 0.0102 |
| sl10737 | G0:0051188 | <1e-4 | ssr5121 | G0:0048522 | <1e-4 | slr0941 | G0:0015075 | <1e-4 | slr6014 | G0:0016020 | 0.3576 | slr1535 | G0:0016788 | 0.0102 |
| sl11632 | G0:0072524 | <1e-4 | ssl3451 | G0:0016054 | <1e-4 | slr0287 | G0:0016817 | <1e-4 | sl15090 | G0:0016020 | 0.3576 | sl11355 | G0:0016788 | 0.0102 |
| slr6051 | G0:0071842 | <1e-4 | sl17065 | G0:0048519 | <1e-4 | sl10230 | G0:0015405 | <1e-4 | sl11217 | G0:0016020 | 0.3576 | slr1970 | G0:0016874 | 0.0102 |
| sl10847 | G0:0006732 | <1e-4 | slr0656 | G0:0006793 | <1e-4 | slr0821 | G0:0016741 | <1e-4 | sl11773 | G0:0016020 | 0.3576 | sl18012 | G0:0016874 | 0.0102 |
| ssr5106 | G0:0019219 | <1e-4 | ssr8047 | G0:0071842 | <1e-4 | slr0976 | G0:0005342 | <1e-4 | ssr0335 | G0:0016020 | 0.3576 | ss15096 | G0:0016788 | 0.0102 |
| sl10147 | G0:0019219 | <1e-4 | sl10762 | G0:0043648 | <1e-4 | sl17078 | G0:0022891 | <1e-4 | slr0890 | G0:0016020 | 0.3576 | slr6005 | G0:0016788 | 0.0102 |
| slr1816 | G0:0022607 | <1e-4 | slr0299 | G0:0009991 | <1e-4 | slr0601 | G0:0022838 | <1e-4 | ssr6079 | G0:0016020 | 0.3576 | slr0637 | G0:0016874 | 0.0102 |
| sl11735 | G0:0031323 | <1e-4 | slr1778 | G0:0009144 | <1e-4 | sl11730 | G0:0015291 | <1e-4 | sl11123 | G0:0016020 | 0.3576 | slr7096 | G0:0016788 | 0.0102 |
| slr5077 | G0:0031326 | <1e-4 | slr0740 | G0:0072522 | <1e-4 | slr0702 | G0:0003674 | <1e-4 | ss18005 | G0:0016020 | 0.3576 | slr5077 | G0:0016874 | 0.0102 |
| sl10736 | G0:0051179 | <1e-4 | ssr0759 | G0:0043170 | <1e-4 | slr1535 | G0:0015405 | <1e-4 | sl10742 | G0:0016020 | 0.3576 | slr1195 | G0:0016788 | 0.0102 |
| sl11131 | G0:0090304 | <1e-4 | sl11062 | G0:0044275 | <1e-4 | ss10410 | G0:0022891 | <1e-4 | slr1104 | G0:0016020 | 0.3576 | slr0521 | G0:0016874 | 0.0102 |
| sl17078 | G0:0048518 | <1e-4 | sl10478 | G0:0009165 | <1e-4 | slr1862 | G0:0022832 | <1e-4 | slr1998 | G0:0016020 | 0.3576 | sl18011 | G0:0016874 | 0.0102 |
| sl11862 | G0:0019637 | <1e-4 | slr1788 | G0:0006753 | <1e-4 | ssr2962 | G0:0060089 | <1e-4 | sl10241 | G0:0016020 | 0.3576 | slr1223 | G0:0016788 | 0.0102 |
| ss12148 | G0:0031326 | <1e-4 | sl10456 | G0:0016053 | <1e-4 | slr0731 | G0:0005342 | <1e-4 | sl11961 | G0:0016020 | 0.3576 | sl10176 | G0:0016788 | 0.0102 |
| slr6104 | G0:0006066 | <1e-4 | ssr3572 | G0:0044271 | <1e-4 | slr1222 | G0:0060089 | <1e-4 | sl10371 | G0:0016020 | 0.3576 | slr6022 | G0:0016874 | 0.0102 |



|         |            |       |         |            |       |         |            |       |         |            |        |         |            |        |
|---------|------------|-------|---------|------------|-------|---------|------------|-------|---------|------------|--------|---------|------------|--------|
| ssl2595 | G0:0006631 | <1e-4 | s110827 | G0:0009892 | <1e-4 | ss15031 | G0:0060089 | <1e-4 | slr1186 | G0:0016020 | 0.3576 | s110597 | G0:0016788 | 0.0102 |
| s110735 | G0:0048878 | <1e-4 | s110661 | G0:0072521 | <1e-4 | slr0569 | G0:0022838 | <1e-4 | s115061 | G0:0016020 | 0.3576 | slr1168 | G0:0016788 | 0.0102 |
| s110898 | G0:0019362 | <1e-4 | slr0845 | G0:0019222 | <1e-4 | ss10483 | G0:0016746 | <1e-4 | slr8014 | G0:0016020 | 0.3576 | s110181 | G0:0016788 | 0.0102 |
| ssr3341 | G0:0009161 | <1e-4 | s110853 | G0:0050789 | <1e-4 | s110249 | G0:0015293 | <1e-4 | s111571 | G0:0016020 | 0.3576 | ssr1425 | G0:0016874 | 0.0102 |
| slr1959 | G0:0019637 | <1e-4 | s111318 | G0:0045184 | <1e-4 | slr1572 | G0:0005342 | <1e-4 | slr0362 | G0:0016020 | 0.3576 | s110282 | G0:0016788 | 0.0102 |
| slr7097 | G0:0009123 | <1e-4 | s110505 | G0:0043170 | <1e-4 | slr1811 | G0:0022890 | <1e-4 | s115006 | G0:0016020 | 0.3576 | ss13451 | G0:0016788 | 0.0102 |
| slr6081 | G0:0060255 | <1e-4 | s111109 | G0:0031326 | <1e-4 | ssl2595 | G0:0016818 | <1e-4 | ss11417 | G0:0016020 | 0.3576 | slr1623 | G0:0016874 | 0.0102 |
| slr1142 | G0:0031640 | <1e-4 | ssr2142 | G0:0009308 | <1e-4 | ssr8047 | G0:0022832 | <1e-4 | ss12717 | G0:0016020 | 0.3576 | slr8014 | G0:0016788 | 0.0102 |
| slr7057 | G0:0022411 | <1e-4 | slr2080 | G0:0046907 | <1e-4 | s111293 | G0:0043492 | <1e-4 | s110498 | G0:0016020 | 0.3576 | slr5053 | G0:0016874 | 0.0102 |
| slr2000 | G0:0006733 | <1e-4 | slr0592 | G0:0008150 | <1e-4 | ss11792 | G0:0022836 | <1e-4 | s110282 | G0:0016020 | 0.3576 | slr1915 | G0:0016874 | 0.0102 |
| s115026 | G0:0031326 | <1e-4 | slr0962 | G0:0044260 | <1e-4 | slr5087 | G0:0022890 | <1e-4 | slr1419 | G0:0016020 | 0.3576 | slr0262 | G0:0016788 | 0.0102 |
| slr0211 | G0:0055082 | <1e-4 | ssr2848 | G0:0044283 | <1e-4 | slr1069 | G0:0016462 | <1e-4 | slr0049 | G0:0016020 | 0.3576 | s110761 | G0:0016788 | 0.0102 |
| s110905 | G0:0006066 | <1e-4 | ssr1558 | G0:0071496 | <1e-4 | s111950 | G0:0022838 | <1e-4 | slr0751 | G0:0016020 | 0.3576 | s111233 | G0:0016874 | 0.0102 |
| slr6074 | G0:0048523 | <1e-4 | slr0664 | G0:0034654 | <1e-4 | s110886 | G0:0022892 | <1e-4 | slr1179 | G0:0016020 | 0.3576 | slr2119 | G0:0016788 | 0.0102 |
| s111680 | G0:0042180 | <1e-4 | s110837 | G0:0006631 | <1e-4 | slr2115 | G0:0022890 | <1e-4 | s112015 | G0:0016020 | 0.3576 | slr0667 | G0:0016874 | 0.0102 |
| s111285 | G0:0042455 | <1e-4 | s115006 | G0:0051188 | <1e-4 | s110242 | G0:0043167 | <1e-4 | slr1223 | G0:0016020 | 0.3576 | s116054 | G0:0016788 | 0.0102 |
| slr1188 | G0:0044260 | <1e-4 | slr7014 | G0:0050789 | <1e-4 | s110606 | G0:0022892 | <1e-4 | slr1261 | G0:0016020 | 0.3576 | slr6063 | G0:0016788 | 0.0102 |
| slr2144 | G0:0072524 | <1e-4 | s110444 | G0:0010556 | <1e-4 | s111399 | G0:0015291 | <1e-4 | s111485 | G0:0016020 | 0.3576 | slr7016 | G0:0016788 | 0.0102 |
| ssl6035 | G0:0072522 | <1e-4 | s111132 | G0:0009126 | <1e-4 | slr2032 | G0:0022891 | <1e-4 | ssr2317 | G0:0016020 | 0.3576 | s115026 | G0:0016788 | 0.0102 |
| ssr0536 | G0:0009150 | <1e-4 | slr1288 | G0:0031326 | <1e-4 | slr1648 | G0:0015267 | <1e-4 | slr1315 | G0:0016020 | 0.3576 | s111162 | G0:0016788 | 0.0102 |
| slr0619 | G0:0005996 | <1e-4 | slr1103 | G0:0019219 | <1e-4 | slr0006 | G0:0016817 | <1e-4 | ssr6026 | G0:0016020 | 0.3576 | slr0914 | G0:0016874 | 0.0102 |
| ssr2318 | G0:0072527 | <1e-4 | slr0285 | G0:0044255 | <1e-4 | slr7097 | G0:0060089 | <1e-4 | s111510 | G0:0016020 | 0.3576 | ssr8047 | G0:0016874 | 0.0102 |
| ssl3382 | G0:0044282 | <1e-4 | slr1964 | G0:0018130 | <1e-4 | s110710 | G0:0016746 | <1e-4 | s111939 | G0:0016020 | 0.3576 | ssr7072 | G0:0016788 | 0.0102 |
| s111040 | G0:0009308 | <1e-4 | slr1571 | G0:0051716 | <1e-4 | s110361 | G0:0022832 | <1e-4 | s110473 | G0:0016020 | 0.3576 | ss12009 | G0:0016788 | 0.0102 |
| ssl2420 | G0:0050789 | <1e-4 | s110397 | G0:0044271 | <1e-4 | slr0909 | G0:0022890 | <1e-4 | s111770 | G0:0016020 | 0.3576 | ssr2318 | G0:0016874 | 0.0102 |
| slr0514 | G0:0048519 | <1e-4 | slr0816 | G0:0051171 | <1e-4 | slr1143 | G0:0042623 | <1e-4 | slr1958 | G0:0016020 | 0.3576 | slr0960 | G0:0016788 | 0.0102 |
| s110175 | G0:0034641 | <1e-4 | slr0112 | G0:0044283 | <1e-4 | slr1752 | G0:0015077 | <1e-4 | s111765 | G0:0016020 | 0.3576 | s118033 | G0:0016788 | 0.0102 |
| ssr3122 | G0:0080090 | <1e-4 | slr0431 | G0:0043436 | <1e-4 | slr0552 | G0:0015077 | <1e-4 | slr5023 | G0:0016020 | 0.3576 | ssr2047 | G0:0016874 | 0.0102 |
| ssr1765 | G0:0043549 | <1e-4 | ss13451 | G0:0052188 | <1e-4 | s111219 | G0:0022891 | <1e-4 | slr0380 | G0:0016020 | 0.3576 | slr1150 | G0:0016788 | 0.0102 |
| s110703 | G0:0090304 | <1e-4 | s111938 | G0:0080090 | <1e-4 | slr0613 | G0:0008171 | <1e-4 | s110760 | G0:0016020 | 0.3576 | slr0148 | G0:0016788 | 0.0102 |
| slr1813 | G0:0009308 | <1e-4 | slr6044 | G0:0051246 | <1e-4 | slr0551 | G0:0022803 | <1e-4 | s111825 | G0:0016020 | 0.3576 | slr1737 | G0:0016874 | 0.0102 |
| s111239 | G0:0050896 | <1e-4 | slr6080 | G0:0018130 | <1e-4 | s110609 | G0:0043167 | <1e-4 | s111921 | G0:0016020 | 0.3576 | s111571 | G0:0016788 | 0.0102 |
| slr0386 | G0:0006220 | <1e-4 | slr1266 | G0:0008150 | <1e-4 | s111902 | G0:0015405 | <1e-4 | slr0196 | G0:0016020 | 0.3576 | slr2000 | G0:0016874 | 0.0102 |
| s111061 | G0:0043170 | <1e-4 | slr1957 | G0:0019362 | <1e-4 | s118019 | G0:0022890 | <1e-4 | s111232 | G0:0016020 | 0.3576 | s111400 | G0:0016788 | 0.0102 |
| ssl6061 | G0:0080090 | <1e-4 | slr0157 | G0:0009987 | <1e-4 | s110586 | G0:0016741 | <1e-4 | slr1568 | G0:0016020 | 0.3576 | ss15068 | G0:0016874 | 0.0102 |
| ssl2814 | G0:0006631 | <1e-4 | s111752 | G0:0006631 | <1e-4 | slr5118 | G0:0016818 | <1e-4 | slr0964 | G0:0016020 | 0.3576 | s111583 | G0:0016874 | 0.0102 |
| slr0569 | G0:0050794 | <1e-4 | ssr7017 | G0:0018130 | <1e-4 | s111049 | G0:0022832 | <1e-4 | s117047 | G0:0016020 | 0.3576 | s110925 | G0:0016874 | 0.0102 |
| ssr2912 | G0:0006721 | <1e-4 | slr6072 | G0:0006631 | <1e-4 | s111135 | G0:0008171 | <1e-4 | slr0168 | G0:0016020 | 0.3576 | s110284 | G0:0016788 | 0.0102 |
| ssl2781 | G0:0006163 | <1e-4 | slr1495 | G0:0080090 | <1e-4 | slr2118 | G0:0016817 | <1e-4 | slr0199 | G0:0016020 | 0.3576 | slr1752 | G0:0016874 | 0.0102 |
| s117030 | G0:0044255 | <1e-4 | s110410 | G0:0051171 | <1e-4 | s115132 | G0:0043167 | <1e-4 | s110284 | G0:0016020 | 0.3576 | slr1056 | G0:0016874 | 0.0102 |
| ssl1690 | G0:0009893 | <1e-4 | slr1150 | G0:0048522 | <1e-4 | ss15065 | G0:0008171 | <1e-4 | slr1342 | G0:0016020 | 0.3576 | ss17038 | G0:0016874 | 0.0102 |
| slr1437 | G0:0043933 | <1e-4 | slr1767 | G0:0051246 | <1e-4 | slr0431 | G0:0043492 | <1e-4 | ssr1766 | G0:0016020 | 0.3576 | slr1624 | G0:0016874 | 0.0102 |
| slr0810 | G0:0019222 | <1e-4 | ss13549 | G0:0031326 | <1e-4 | s110327 | G0:0015293 | <1e-4 | s110761 | G0:0016020 | 0.3576 | slr2049 | G0:0016874 | 0.0102 |
| slr0872 | G0:0046164 | <1e-4 | s111123 | G0:0051234 | <1e-4 | s111414 | G0:0015077 | <1e-4 | slr7080 | G0:0016020 | 0.3576 | s110659 | G0:0016788 | 0.0102 |
| slr1547 | G0:0080090 | <1e-4 | slr5126 | G0:0051171 | <1e-4 | slr0769 | G0:0016462 | <1e-4 | slr1957 | G0:0016020 | 0.3576 | s110218 | G0:0016788 | 0.0102 |
| s110283 | G0:0009309 | <1e-4 | slr1178 | G0:0050789 | <1e-4 | slr1647 | G0:0008171 | <1e-4 | slr0592 | G0:0016020 | 0.3576 | ssr1766 | G0:0016788 | 0.0102 |
| slr1800 | G0:0048518 | <1e-4 | ssr2787 | G0:0044281 | <1e-4 | slr0271 | G0:0015405 | <1e-4 | ss15099 | G0:0016020 | 0.3576 | slr1102 | G0:0016788 | 0.0102 |
| slr0238 | G0:0009144 | <1e-4 | s110328 | G0:0009199 | <1e-4 | slr2070 | G0:0015405 | <1e-4 | slr6066 | G0:0016020 | 0.3576 | ss11417 | G0:0016788 | 0.0102 |
| slr1174 | G0:0072521 | <1e-4 | slr0013 | G0:0019222 | <1e-4 | s111722 | G0:0022803 | <1e-4 | s111884 | G0:0016020 | 0.3576 | slr1079 | G0:0016874 | 0.0102 |
| slr1441 | G0:0009126 | <1e-4 | s111858 | G0:0022411 | <1e-4 | s110608 | G0:0043167 | <1e-4 | slr7096 | G0:0016020 | 0.3576 | ssr1951 | G0:0016788 | 0.0102 |
| slr1702 | G0:0009057 | <1e-4 | ssr2554 | G0:0006766 | <1e-4 | ss11552 | G0:0022836 | <1e-4 | slr0092 | G0:0016020 | 0.3576 | slr0059 | G0:0016788 | 0.0102 |
| s110176 | G0:0044260 | <1e-4 | s111049 | G0:0090304 | <1e-4 | s117050 | G0:0022832 | <1e-4 | s115130 | G0:0016020 | 0.3576 | ss11972 | G0:0016788 | 0.0102 |
| slr0709 | G0:0051234 | <1e-4 | ssr1256 | G0:0006766 | <1e-4 | ssr5011 | G0:0016741 | <1e-4 | slr1339 | G0:0016020 | 0.3576 | slr1450 | G0:0016874 | 0.0102 |
| slr7057 | G0:0072524 | <1e-4 | s110752 | G0:0006576 | <1e-4 | s111381 | G0:0022832 | <1e-4 | ss15045 | G0:0016020 | 0.3576 | s115033 | G0:0016788 | 0.0102 |

|         |            |        |         |            |        |          |            |        |         |            |        |         |            |        |
|---------|------------|--------|---------|------------|--------|----------|------------|--------|---------|------------|--------|---------|------------|--------|
| slr6067 | G0:0031640 | <1e-4  | ssr1375 | G0:0044255 | <1e-4  | slr6065  | G0:0022838 | <1e-4  | ssr1407 | G0:0016020 | 0.3576 | sl16052 | G0:0016874 | 0.0102 |
| slr1907 | G0:0009057 | <1e-4  | slr0333 | G0:0009394 | <1e-4  | ss15100  | G0:0022803 | <1e-4  | slr1721 | G0:0016020 | 0.3576 | ssr1041 | G0:0016874 | 0.0102 |
| ssr7079 | G0:0009394 | <1e-4  | slr2121 | G0:0006733 | <1e-4  | sl10736  | G0:0060089 | <1e-4  | sl11163 | G0:0016020 | 0.3576 | slr1681 | G0:0016874 | 0.0102 |
| sl11485 | G0:0042451 | <1e-4  | sl10913 | G0:0009142 | <1e-4  | slr0341  | G0:0016741 | <1e-4  | slr6013 | G0:0016020 | 0.3576 | slr1958 | G0:0016788 | 0.0102 |
| slr7013 | G0:0009165 | <1e-4  | slr1170 | G0:0051818 | <1e-4  | sl18032  | G0:0042623 | <1e-4  | sl10048 | G0:0016020 | 0.3576 | ssr3570 | G0:0016874 | 0.0102 |
| slr0262 | G0:0006732 | <1e-4  | ssr0761 | G0:0046394 | <1e-4  | slr1668  | G0:0022891 | <1e-4  | slr1103 | G0:0016020 | 0.3576 | sl11921 | G0:0016788 | 0.0102 |
| slr7091 | G0:0043549 | <1e-4  | sl11609 | G0:0050896 | <1e-4  | slr0967  | G0:0016817 | <1e-4  | sl11769 | G0:0016020 | 0.3576 | slr0725 | G0:0016874 | 0.0102 |
| sl10174 | G0:0009161 | <1e-4  | ss17022 | G0:0009056 | <1e-4  | sl10172  | G0:0022890 | <1e-4  | slr1956 | G0:0016020 | 0.3576 | sl10372 | G0:0016874 | 0.0102 |
| ssr0761 | G0:0046483 | <1e-4  | slr1082 | G0:0034654 | <1e-4  | slr0157  | G0:0008171 | <1e-4  | slr1814 | G0:0016020 | 0.3576 | slr6090 | G0:0016788 | 0.0102 |
| sl10361 | G0:0022607 | <1e-4  | slr7100 | G0:0009150 | <1e-4  | sl10702  | G0:0022836 | <1e-4  | slr1547 | G0:0016020 | 0.3576 | slr0146 | G0:0016788 | 0.0102 |
| ss12065 | G0:0051246 | <1e-4  | slr1203 | G0:0048522 | <1e-4  | slr1081  | G0:0022836 | <1e-4  | sl11306 | G0:0016020 | 0.3576 | slr1944 | G0:0016874 | 0.0102 |
| slr0598 | G0:0016788 | 0.0102 | slr0398 | G0:0016829 | 0.0068 | slr0888  | G0:0006812 | 0.0049 | sl11135 | G0:0030001 | 0.0038 | slr6044 | G0:0016853 | 0.0024 |
| slr5111 | G0:0016874 | 0.0102 | sl11509 | G0:0016829 | 0.0068 | sl11573  | G0:0006812 | 0.0049 | sl10442 | G0:0006886 | 0.0038 | slr0780 | G0:0016853 | 0.0024 |
| sl11232 | G0:0016788 | 0.0102 | slr7025 | G0:0016829 | 0.0068 | ssr2333  | G0:0006812 | 0.0049 | slr0989 | G0:0044238 | 0.0038 | slr2004 | G0:0016853 | 0.0024 |
| sl15047 | G0:0016788 | 0.0102 | sl10218 | G0:0016829 | 0.0068 | slr0670  | G0:0006812 | 0.0049 | sl10735 | G0:0006139 | 0.0038 | sl10376 | G0:0016853 | 0.0024 |
| slr8022 | G0:0016874 | 0.0102 | slr1534 | G0:0016829 | 0.0068 | slr0587  | G0:0006812 | 0.0049 | ssr6027 | G0:0006886 | 0.0038 | slr6028 | G0:0016853 | 0.0024 |
| sl18002 | G0:0016788 | 0.0102 | slr1957 | G0:0016829 | 0.0068 | sl15067  | G0:0006812 | 0.0049 | sl10742 | G0:0006790 | 0.0038 | sl10647 | G0:0043169 | 0.0024 |
| sl11960 | G0:0016788 | 0.0102 | slr8014 | G0:0016829 | 0.0068 | ss10467  | G0:0006812 | 0.0049 | slr6004 | G0:0006790 | 0.0038 | slr0509 | G0:0016853 | 0.0024 |
| sl11062 | G0:0007154 | 0.0101 | sl11764 | G0:0016829 | 0.0068 | slr5073  | G0:0006812 | 0.0049 | sl11510 | G0:0006790 | 0.0038 | ssr7084 | G0:0016853 | 0.0024 |
| sl10822 | G0:0006396 | 0.0101 | slr6005 | G0:0016829 | 0.0068 | ssr2047  | G0:0006812 | 0.0049 | ssr2912 | G0:0006790 | 0.0038 | slr0442 | G0:0043169 | 0.0024 |
| slr1677 | G0:0007154 | 0.0101 | ssr6026 | G0:0016829 | 0.0068 | ss10788  | G0:0006812 | 0.0049 | sl10545 | G0:0006790 | 0.0038 | sl11476 | G0:0016853 | 0.0024 |
| sl11764 | G0:0007154 | 0.0101 | ssr1766 | G0:0016829 | 0.0068 | ssr8013  | G0:0006812 | 0.0049 | slr0888 | G0:0006886 | 0.0038 | sl11254 | G0:0016853 | 0.0024 |
| sl11939 | G0:0007154 | 0.0101 | slr0151 | G0:0016829 | 0.0068 | sl11381  | G0:0006812 | 0.0049 | sl11606 | G0:0006790 | 0.0038 | sl18035 | G0:0016853 | 0.0024 |
| slr5119 | G0:0007154 | 0.0101 | sl11757 | G0:0016829 | 0.0068 | sl10749  | G0:0006812 | 0.0049 | sl11570 | G0:0006886 | 0.0038 | sl10022 | G0:0046873 | 0.0024 |
| sl18032 | G0:0007154 | 0.0101 | slr2032 | G0:0016829 | 0.0068 | sl11388  | G0:0006812 | 0.0049 | slr2101 | G0:0006790 | 0.0038 | sl11164 | G0:0016853 | 0.0024 |
| slr1429 | G0:0007154 | 0.0101 | sl17064 | G0:0016829 | 0.0068 | slr0326  | G0:0006812 | 0.0049 | sl11446 | G0:0006139 | 0.0038 | sl10238 | G0:0043169 | 0.0024 |
| slr0806 | G0:0007154 | 0.0101 | sl16054 | G0:0016829 | 0.0068 | sl17090  | G0:0006812 | 0.0049 | slr0605 | G0:0044238 | 0.0038 | sl11834 | G0:0016853 | 0.0024 |
| ssr6026 | G0:0007154 | 0.0101 | sl10742 | G0:0016829 | 0.0068 | sl11307  | G0:0006812 | 0.0049 | ss13829 | G0:0006886 | 0.0038 | sl15063 | G0:0016853 | 0.0024 |
| sl11251 | G0:0008299 | 0.0101 | slr6031 | G0:0016829 | 0.0068 | ss15114  | G0:0006812 | 0.0049 | slr0299 | G0:0030001 | 0.0038 | ss12064 | G0:0016853 | 0.0024 |
| sl10811 | G0:0007154 | 0.0101 | ss11004 | G0:0016829 | 0.0068 | slr1599  | G0:0006812 | 0.0049 | sl10659 | G0:0006790 | 0.0038 | slr0607 | G0:0046873 | 0.0024 |
| sl10192 | G0:0006396 | 0.0101 | sl10498 | G0:0016829 | 0.0068 | ssr2060  | G0:0006812 | 0.0049 | slr0852 | G0:0030001 | 0.0038 | sl11321 | G0:0016853 | 0.0024 |
| sl10590 | G0:0008299 | 0.0101 | sl11571 | G0:0016829 | 0.0068 | ssr1425  | G0:0006812 | 0.0049 | sl10749 | G0:0006886 | 0.0038 | slr1599 | G0:0016853 | 0.0024 |
| slr0393 | G0:0007154 | 0.0101 | slr0380 | G0:0016829 | 0.0068 | ss18039  | G0:0006812 | 0.0049 | ssr7079 | G0:0006886 | 0.0038 | slr0670 | G0:0016853 | 0.0024 |
| ssr2554 | G0:0007154 | 0.0101 | ss11923 | G0:0016829 | 0.0068 | sl10394  | G0:0006812 | 0.0049 | slr8044 | G0:0006886 | 0.0038 | sl11151 | G0:0016853 | 0.0024 |
| slr0505 | G0:0007154 | 0.0101 | slr5119 | G0:0016829 | 0.0068 | ss11378  | G0:0006812 | 0.0049 | sl10157 | G0:0006886 | 0.0038 | sl11089 | G0:0016853 | 0.0024 |
| slr6064 | G0:0007154 | 0.0101 | slr1223 | G0:0016829 | 0.0068 | slr0588  | G0:0006812 | 0.0049 | slr0303 | G0:0006886 | 0.0038 | sl10765 | G0:0016853 | 0.0024 |
| ss15095 | G0:0007154 | 0.0101 | sl10406 | G0:0016829 | 0.0068 | slr0708  | G0:0006812 | 0.0049 | slr1935 | G0:0006886 | 0.0038 | slr1087 | G0:0016853 | 0.0024 |
| slr0957 | G0:0008299 | 0.0101 | slr0569 | G0:0016829 | 0.0068 | slr0039  | G0:0006812 | 0.0049 | sl11659 | G0:0044238 | 0.0038 | slr6075 | G0:0016853 | 0.0024 |
| slr1660 | G0:0007154 | 0.0101 | slr1315 | G0:0016829 | 0.0068 | slr0755  | G0:0006812 | 0.0049 | sl15097 | G0:0006790 | 0.0038 | slr0039 | G0:0016853 | 0.0024 |
| ss15096 | G0:0007154 | 0.0101 | sl11921 | G0:0016829 | 0.0068 | ssr0109  | G0:0006812 | 0.0049 | slr0065 | G0:0006790 | 0.0038 | sl11532 | G0:0016853 | 0.0024 |
| sl11562 | G0:0006396 | 0.0101 | sl10853 | G0:0016829 | 0.0068 | ssr2318  | G0:0006812 | 0.0049 | slr7016 | G0:0006790 | 0.0038 | ssr2553 | G0:0016853 | 0.0024 |
| sl10995 | G0:0008299 | 0.0101 | ss12717 | G0:0016829 | 0.0068 | slr1911  | G0:0006812 | 0.0049 | sl10319 | G0:0044238 | 0.0038 | ssr1391 | G0:0046873 | 0.0024 |
| sl10614 | G0:0008299 | 0.0101 | ss15129 | G0:0016829 | 0.0068 | ssr6078  | G0:0006812 | 0.0049 | sm10011 | G0:0044238 | 0.0038 | slr1627 | G0:0016853 | 0.0024 |
| ss11923 | G0:0007154 | 0.0101 | sl11880 | G0:0016829 | 0.0068 | sl110047 | G0:0006812 | 0.0049 | slr0517 | G0:0006886 | 0.0038 | slr0291 | G0:0016853 | 0.0024 |
| sl11735 | G0:0007154 | 0.0101 | slr6080 | G0:0016829 | 0.0068 | sl118011 | G0:0006812 | 0.0049 | slr0285 | G0:0006886 | 0.0038 | ssr5074 | G0:0016853 | 0.0024 |
| ss12471 | G0:0007154 | 0.0101 | slr1863 | G0:0016829 | 0.0068 | sl16052  | G0:0006812 | 0.0049 | sl11388 | G0:0006886 | 0.0038 | slr5077 | G0:0016853 | 0.0024 |
| ssr6020 | G0:0007154 | 0.0101 | sl10913 | G0:0016829 | 0.0068 | slr8022  | G0:0006812 | 0.0049 | slr1674 | G0:0030001 | 0.0038 | slr2060 | G0:0016853 | 0.0024 |
| sl10857 | G0:0007154 | 0.0101 | sl11884 | G0:0016829 | 0.0068 | sl117078 | G0:0006812 | 0.0049 | sl10939 | G0:0006886 | 0.0038 | slr7073 | G0:0016853 | 0.0024 |
| sl10400 | G0:0007154 | 0.0101 | ss13142 | G0:0016829 | 0.0068 | slr8021  | G0:0006812 | 0.0049 | sl10898 | G0:0006139 | 0.0038 | sl10691 | G0:0016853 | 0.0024 |
| slr2080 | G0:0008299 | 0.0101 | slr1813 | G0:0016829 | 0.0068 | sl111151 | G0:0006812 | 0.0049 | slr0742 | G0:0044238 | 0.0038 | slr0516 | G0:0016853 | 0.0024 |
| slr1827 | G0:0008299 | 0.0101 | slr6006 | G0:0016829 | 0.0068 | slr0582  | G0:0006812 | 0.0049 | sl11203 | G0:0006790 | 0.0038 | ssr2802 | G0:0016853 | 0.0024 |
| sl11611 | G0:0006396 | 0.0101 | slr6049 | G0:0016829 | 0.0068 | slr2003  | G0:0006812 | 0.0049 | sl11071 | G0:0044238 | 0.0038 | sl11036 | G0:0016853 | 0.0024 |
| slr1852 | G0:0008299 | 0.0101 | slr6015 | G0:0016829 | 0.0068 | sl110905 | G0:0006812 | 0.0049 | slr1069 | G0:0006790 | 0.0038 | slr0923 | G0:0046873 | 0.0024 |
| slr1074 | G0:0008299 | 0.0101 | ss15031 | G0:0016829 | 0.0068 | slr6051  | G0:0006812 | 0.0049 | slr6028 | G0:0006886 | 0.0038 | slr1537 | G0:0016853 | 0.0024 |

|         |            |        |         |            |        |         |            |        |         |            |        |         |            |        |
|---------|------------|--------|---------|------------|--------|---------|------------|--------|---------|------------|--------|---------|------------|--------|
| slr0978 | GO:0006396 | 0.0101 | slr6065 | GO:0016829 | 0.0068 | slr1290 | GO:0006812 | 0.0049 | sl11915 | GO:0006886 | 0.0038 | ssr2972 | GO:0016853 | 0.0024 |
| sl15033 | GO:0007154 | 0.0101 | sl10063 | GO:0016829 | 0.0068 | sl11915 | GO:0006812 | 0.0049 | slr1816 | GO:0006886 | 0.0038 | slr0771 | GO:0016853 | 0.0024 |
| sl11162 | GO:0007154 | 0.0101 | slr0196 | GO:0016829 | 0.0068 | sl10861 | GO:0004871 | 0.0049 | slr1128 | GO:0044238 | 0.0038 | slr1449 | GO:0016853 | 0.0024 |
| sl10505 | GO:0006396 | 0.0101 | slr7095 | GO:0016829 | 0.0068 | slr1385 | GO:0008324 | 0.0049 | sl10639 | GO:0044238 | 0.0038 | slr0976 | GO:0016853 | 0.0024 |
| sl10284 | GO:0007154 | 0.0101 | slr0601 | GO:0016829 | 0.0068 | ss12255 | GO:0008324 | 0.0049 | slr0598 | GO:0006790 | 0.0038 | slr2049 | GO:0016853 | 0.0024 |
| sl10265 | GO:0007154 | 0.0101 | slr1306 | GO:0016829 | 0.0068 | sl10661 | GO:0008324 | 0.0049 | sl11573 | GO:0006886 | 0.0038 | slr7100 | GO:0016853 | 0.0024 |
| slr0619 | GO:0007154 | 0.0101 | sl10659 | GO:0016829 | 0.0068 | slr0341 | GO:0008324 | 0.0049 | slr0765 | GO:0006139 | 0.0038 | ss10353 | GO:0046873 | 0.0024 |
| slr1168 | GO:0007154 | 0.0101 | slr5116 | GO:0016829 | 0.0068 | sl11528 | GO:0019538 | 0.0048 | slr0554 | GO:0044238 | 0.0038 | sl15003 | GO:0016853 | 0.0024 |
| sl11344 | GO:0008299 | 0.0101 | sl11378 | GO:0016829 | 0.0068 | ssr0692 | GO:0019538 | 0.0048 | slr1287 | GO:0044238 | 0.0038 | sl10939 | GO:0016853 | 0.0024 |
| slr1258 | GO:0008299 | 0.0101 | slr1397 | GO:0016829 | 0.0068 | ssr3154 | GO:0019538 | 0.0048 | slr0751 | GO:0006790 | 0.0038 | slr1935 | GO:0016853 | 0.0024 |
| sl10448 | GO:0007154 | 0.0101 | slr1263 | GO:0016829 | 0.0068 | slr1591 | GO:0019538 | 0.0048 | sl12006 | GO:0030001 | 0.0038 | slr1807 | GO:0016853 | 0.0024 |
| sl11072 | GO:0008299 | 0.0101 | sl17062 | GO:0016829 | 0.0068 | slr0818 | GO:0019538 | 0.0048 | sl11601 | GO:0030001 | 0.0038 | ss10410 | GO:0016853 | 0.0024 |
| sl10639 | GO:0008299 | 0.0101 | slr1102 | GO:0016829 | 0.0068 | slr1614 | GO:0008233 | 0.0048 | slr7096 | GO:0006790 | 0.0038 | ssr2067 | GO:0016853 | 0.0024 |
| sl10913 | GO:0007154 | 0.0101 | sl10102 | GO:0016829 | 0.0068 | ss10750 | GO:0008233 | 0.0048 | slr0588 | GO:0006886 | 0.0038 | ss13573 | GO:0016853 | 0.0024 |
| slr7058 | GO:0007154 | 0.0101 | sl10930 | GO:0016829 | 0.0068 | slr1852 | GO:0006790 | 0.0047 | slr0650 | GO:0044238 | 0.0038 | slr2117 | GO:0016853 | 0.0024 |
| sl15046 | GO:0007154 | 0.0101 | slr1362 | GO:0016829 | 0.0068 | sl10810 | GO:0006790 | 0.0047 | sl11265 | GO:0006790 | 0.0038 | slr0184 | GO:0016853 | 0.0024 |
| sl10225 | GO:0008299 | 0.0101 | ss17046 | GO:0016829 | 0.0068 | slr2070 | GO:0007154 | 0.0047 | slr1196 | GO:0030001 | 0.0038 | sl18027 | GO:0016853 | 0.0024 |
| slr0400 | GO:0007154 | 0.0101 | sl11511 | GO:0016829 | 0.0068 | sl11726 | GO:0007154 | 0.0047 | slr0104 | GO:0044238 | 0.0038 | slr0106 | GO:0016853 | 0.0024 |
| ss15099 | GO:0007154 | 0.0101 | sl11797 | GO:0016829 | 0.0068 | slr6071 | GO:0007154 | 0.0047 | sl10424 | GO:0030001 | 0.0038 | sl15089 | GO:0016853 | 0.0024 |
| sl11512 | GO:0008299 | 0.0101 | ssr2843 | GO:0006396 | 0.0067 | ss11300 | GO:0007154 | 0.0047 | sl10564 | GO:0044238 | 0.0038 | sl10875 | GO:0016853 | 0.0024 |
| slr0971 | GO:0007154 | 0.0101 | sl10658 | GO:0016853 | 0.0067 | slr0989 | GO:0006790 | 0.0047 | slr7025 | GO:0006790 | 0.0038 | slr0208 | GO:0043169 | 0.0024 |
| sl10781 | GO:0008299 | 0.0101 | sl10444 | GO:0016853 | 0.0067 | ssr2754 | GO:0006790 | 0.0047 | slr1958 | GO:0006790 | 0.0038 | slr1425 | GO:0016853 | 0.0024 |
| sl10860 | GO:0007154 | 0.0101 | slr6101 | GO:0016853 | 0.0067 | slr0976 | GO:0007154 | 0.0047 | slr5016 | GO:0006886 | 0.0038 | sl10606 | GO:0043169 | 0.0024 |
| slr7092 | GO:0007154 | 0.0101 | ss13379 | GO:0016853 | 0.0067 | ss10483 | GO:0006790 | 0.0047 | sl15028 | GO:0006886 | 0.0038 | sl10910 | GO:0046873 | 0.0024 |
| sl11092 | GO:0007154 | 0.0101 | sl18002 | GO:0016853 | 0.0067 | ss11046 | GO:0007154 | 0.0047 | slr1852 | GO:0044238 | 0.0038 | slr0728 | GO:0016853 | 0.0024 |
| ssr5120 | GO:0007154 | 0.0101 | sl10811 | GO:0016853 | 0.0067 | slr0521 | GO:0007154 | 0.0047 | sl11062 | GO:0006790 | 0.0038 | ss10788 | GO:0016853 | 0.0024 |
| slr1611 | GO:0007154 | 0.0101 | sl11414 | GO:0016853 | 0.0067 | slr0366 | GO:0006139 | 0.0047 | slr0816 | GO:0006886 | 0.0038 | slr7102 | GO:0016853 | 0.0024 |
| sl10423 | GO:0007154 | 0.0101 | sl11509 | GO:0016853 | 0.0067 | slr1474 | GO:0007154 | 0.0047 | slr0771 | GO:0006886 | 0.0038 | slr0313 | GO:0016853 | 0.0024 |
| slr6004 | GO:0007154 | 0.0101 | slr1306 | GO:0016853 | 0.0067 | slr5087 | GO:0007154 | 0.0047 | sl12015 | GO:0006790 | 0.0038 | sl11106 | GO:0016853 | 0.0024 |
| slr1863 | GO:0007154 | 0.0101 | sl11510 | GO:0016853 | 0.0067 | ssr1473 | GO:0007154 | 0.0047 | slr0914 | GO:0006886 | 0.0038 | slr7060 | GO:0016853 | 0.0024 |
| slr2048 | GO:0008299 | 0.0101 | sl10238 | GO:0008324 | 0.0067 | sl16055 | GO:0007154 | 0.0047 | sl10911 | GO:0044238 | 0.0038 | ssr0109 | GO:0016853 | 0.0024 |
| slr0964 | GO:0007154 | 0.0101 | ss11464 | GO:0016853 | 0.0067 | slr0207 | GO:0006790 | 0.0047 | slr1970 | GO:0006886 | 0.0038 | slr1079 | GO:0016853 | 0.0024 |
| sl10623 | GO:0008299 | 0.0101 | sl18004 | GO:0016853 | 0.0067 | ss12064 | GO:0007154 | 0.0047 | sl10405 | GO:0006886 | 0.0038 | slr1174 | GO:0016853 | 0.0024 |
| ssr0102 | GO:0007154 | 0.0101 | slr7082 | GO:0016853 | 0.0067 | sl10297 | GO:0006790 | 0.0047 | slr0468 | GO:0044238 | 0.0038 | sl16052 | GO:0016853 | 0.0024 |
| sl11240 | GO:0008299 | 0.0101 | slr1814 | GO:0016853 | 0.0067 | ssr0336 | GO:0007154 | 0.0047 | slr0959 | GO:0006790 | 0.0038 | ssr7017 | GO:0016853 | 0.0024 |
| sl12013 | GO:0007154 | 0.0101 | slr0196 | GO:0016853 | 0.0067 | slr2092 | GO:0006139 | 0.0047 | slr6008 | GO:0006790 | 0.0038 | ss17039 | GO:0016853 | 0.0024 |
| sl10241 | GO:0007154 | 0.0101 | slr1104 | GO:0016853 | 0.0067 | sl10911 | GO:0006790 | 0.0047 | sl11965 | GO:0016829 | 0.0038 | slr5101 | GO:0016853 | 0.0024 |
| ss10353 | GO:0006396 | 0.0101 | slr7097 | GO:0016853 | 0.0067 | slr5127 | GO:0007154 | 0.0047 | slr1083 | GO:0046873 | 0.0038 | slr0731 | GO:0016853 | 0.0024 |
| slr0287 | GO:0016788 | 0.0101 | slr1069 | GO:0016853 | 0.0067 | sl10595 | GO:0006790 | 0.0047 | slr1505 | GO:0005216 | 0.0038 | slr1726 | GO:0046873 | 0.0024 |
| slr1441 | GO:0016788 | 0.0101 | ssr3410 | GO:0016853 | 0.0067 | sl11858 | GO:0006139 | 0.0047 | ssr2848 | GO:0005216 | 0.0038 | slr1570 | GO:0016853 | 0.0024 |
| slr2025 | GO:0016788 | 0.0101 | slr1657 | GO:0016853 | 0.0067 | slr0815 | GO:0006790 | 0.0047 | sl10524 | GO:0016829 | 0.0038 | slr0397 | GO:0016853 | 0.0024 |
| slr1023 | GO:0016788 | 0.0101 | slr1768 | GO:0016853 | 0.0067 | slr0517 | GO:0007154 | 0.0047 | sl11218 | GO:0005216 | 0.0038 | ss16035 | GO:0016853 | 0.0024 |
| slr1896 | GO:0016788 | 0.0101 | slr6004 | GO:0016853 | 0.0067 | slr1152 | GO:0006790 | 0.0047 | slr1107 | GO:0046873 | 0.0038 | slr0273 | GO:0016853 | 0.0024 |
| sl10301 | GO:0016788 | 0.0101 | slr0960 | GO:0016853 | 0.0067 | ss15114 | GO:0007154 | 0.0047 | ss10787 | GO:0046873 | 0.0038 | sl11912 | GO:0043169 | 0.0024 |
| ss10109 | GO:0016788 | 0.0101 | slr1923 | GO:0016853 | 0.0067 | sl10691 | GO:0007154 | 0.0047 | sl11060 | GO:0046873 | 0.0038 | ssr6019 | GO:0016853 | 0.0024 |
| ssr1698 | GO:0016788 | 0.0101 | slr1495 | GO:0008324 | 0.0067 | slr0810 | GO:0006139 | 0.0047 | sl10785 | GO:0016829 | 0.0038 | slr0217 | GO:0016853 | 0.0024 |
| slr1045 | GO:0016788 | 0.0101 | slr1179 | GO:0016853 | 0.0067 | slr0232 | GO:0006790 | 0.0047 | slr0360 | GO:0016829 | 0.0038 | ssr1041 | GO:0016853 | 0.0024 |
| sl10263 | GO:0016788 | 0.0101 | slr1568 | GO:0016853 | 0.0067 | slr1944 | GO:0007154 | 0.0047 | sl11426 | GO:0046873 | 0.0038 | sl10586 | GO:0046873 | 0.0024 |
| sl10096 | GO:0016788 | 0.0101 | ssr2912 | GO:0016853 | 0.0067 | sl11289 | GO:0007154 | 0.0047 | sl10645 | GO:0016829 | 0.0038 | slr1789 | GO:0016853 | 0.0024 |
| slr0304 | GO:0016788 | 0.0101 | ss15095 | GO:0016853 | 0.0067 | sl10749 | GO:0007154 | 0.0047 | sl10854 | GO:0046873 | 0.0038 | slr1507 | GO:0016853 | 0.0024 |
| slr0209 | GO:0016788 | 0.0101 | slr0440 | GO:0016853 | 0.0067 | sl10327 | GO:0007154 | 0.0047 | slr1885 | GO:0016829 | 0.0038 | slr0645 | GO:0016853 | 0.0024 |
| slr1083 | GO:0016788 | 0.0101 | sl11853 | GO:0016853 | 0.0067 | slr0650 | GO:0006790 | 0.0047 | sl11061 | GO:0016829 | 0.0038 | slr1495 | GO:0043169 | 0.0024 |
| slr1066 | GO:0016788 | 0.0101 | slr0769 | GO:0016853 | 0.0067 | slr5101 | GO:0007154 | 0.0047 | slr0023 | GO:0016829 | 0.0038 | slr1084 | GO:0006520 | 0.0023 |
| sl10354 | GO:0016788 | 0.0101 | ss12781 | GO:0016853 | 0.0067 | ss10350 | GO:0007154 | 0.0047 | slr0482 | GO:0016829 | 0.0038 | sl10645 | GO:0006520 | 0.0023 |

|          |            |        |          |            |        |          |            |        |          |            |        |         |            |        |
|----------|------------|--------|----------|------------|--------|----------|------------|--------|----------|------------|--------|---------|------------|--------|
| slr0852  | GO:0016788 | 0.0101 | ssl0832  | GO:0008324 | 0.0067 | slr1209  | GO:0006790 | 0.0047 | slr0476  | GO:0005216 | 0.0038 | ssr2781 | GO:0044249 | 0.0023 |
| sl10513  | GO:0016788 | 0.0101 | sl10597  | GO:0016853 | 0.0067 | sl10160  | GO:0007154 | 0.0047 | slr1572  | GO:0016829 | 0.0038 | slr0921 | GO:0006520 | 0.0023 |
| slr0545  | GO:0016788 | 0.0101 | sl12015  | GO:0016853 | 0.0067 | slr1970  | GO:0007154 | 0.0047 | slr0770  | GO:0016829 | 0.0038 | sl11315 | GO:0006520 | 0.0023 |
| ssl3692  | GO:0016788 | 0.0101 | sl15033  | GO:0016853 | 0.0067 | sl11158  | GO:0007154 | 0.0047 | ssl10109 | GO:0046873 | 0.0038 | slr2084 | GO:0044249 | 0.0023 |
| sl10274  | GO:0016788 | 0.0101 | sl11401  | GO:0016853 | 0.0067 | sl10451  | GO:0006790 | 0.0047 | sl10096  | GO:0005216 | 0.0038 | slr0204 | GO:0006520 | 0.0023 |
| sl10382  | GO:0016788 | 0.0101 | sl10802  | GO:0016853 | 0.0067 | ssl2971  | GO:0007154 | 0.0047 | sl11542  | GO:0046873 | 0.0038 | slr1614 | GO:0006139 | 0.0023 |
| sl10296  | GO:0016788 | 0.0101 | sl10630  | GO:0016853 | 0.0067 | sl11505  | GO:0006790 | 0.0047 | sl10413  | GO:0008233 | 0.0038 | slr0317 | GO:0044249 | 0.0023 |
| ssl10787 | GO:0016788 | 0.0101 | ssl7046  | GO:0016853 | 0.0067 | sl111730 | GO:0006790 | 0.0047 | sl10216  | GO:0016829 | 0.0038 | slr1593 | GO:0006520 | 0.0023 |
| slr0551  | GO:0016788 | 0.0101 | sl10611  | GO:0016853 | 0.0067 | sl11239  | GO:0006790 | 0.0047 | slr2144  | GO:0016829 | 0.0038 | slr1210 | GO:0006520 | 0.0023 |
| slr1194  | GO:0016788 | 0.0101 | slr0333  | GO:0016853 | 0.0067 | ssl2595  | GO:0007154 | 0.0047 | sl10237  | GO:0016829 | 0.0038 | slr1437 | GO:0006520 | 0.0023 |
| slr1613  | GO:0006812 | 0.01   | ssl2471  | GO:0016853 | 0.0067 | sl15028  | GO:0007154 | 0.0047 | ssr3122  | GO:0016829 | 0.0038 | sl11656 | GO:0006520 | 0.0023 |
| slr0272  | GO:0006812 | 0.01   | sl11773  | GO:0016853 | 0.0067 | sl10543  | GO:0007154 | 0.0047 | sl10274  | GO:0005216 | 0.0038 | slr1266 | GO:0006520 | 0.0023 |
| slr7097  | GO:0006812 | 0.01   | sl11217  | GO:0016853 | 0.0067 | slr0699  | GO:0007154 | 0.0047 | sl11934  | GO:0046873 | 0.0038 | slr0006 | GO:0006520 | 0.0023 |
| sl10737  | GO:0006812 | 0.01   | sl10994  | GO:0016853 | 0.0067 | sl10623  | GO:0006790 | 0.0047 | sl11954  | GO:0016829 | 0.0038 | slr0404 | GO:0006520 | 0.0023 |
| slr1547  | GO:0006812 | 0.01   | sl117043 | GO:0016853 | 0.0067 | ssr7035  | GO:0007154 | 0.0047 | sl10456  | GO:0016829 | 0.0038 | slr1275 | GO:0006520 | 0.0023 |
| slr1053  | GO:0007154 | 0.01   | slr5018  | GO:0016853 | 0.0067 | sl10268  | GO:0006790 | 0.0047 | slr0723  | GO:0016829 | 0.0038 | slr1964 | GO:0006520 | 0.0023 |
| sl10238  | GO:0006950 | 0.01   | sl117064 | GO:0016853 | 0.0067 | sl10563  | GO:0007154 | 0.0047 | sl10944  | GO:0016829 | 0.0038 | sl11675 | GO:0006520 | 0.0023 |
| sl10585  | GO:0006812 | 0.01   | sl11862  | GO:0016853 | 0.0067 | slr0341  | GO:0006139 | 0.0047 | slr1391  | GO:0005216 | 0.0038 | slr0103 | GO:0006520 | 0.0023 |
| slr2080  | GO:0006812 | 0.01   | slr0821  | GO:0016853 | 0.0067 | ssl6061  | GO:0007154 | 0.0047 | slr0376  | GO:0005216 | 0.0038 | slr0386 | GO:0006520 | 0.0023 |
| slr0112  | GO:0006812 | 0.01   | slr0058  | GO:0016853 | 0.0067 | slr0610  | GO:0007154 | 0.0047 | sl11186  | GO:0046873 | 0.0038 | sl10191 | GO:0006520 | 0.0023 |
| slr0112  | GO:0007154 | 0.01   | sl10861  | GO:0003723 | 0.0067 | ssr1768  | GO:0007154 | 0.0047 | slr0872  | GO:0016829 | 0.0038 | ssr2843 | GO:0016829 | 0.0023 |
| slr6080  | GO:0006812 | 0.01   | sl10886  | GO:0016853 | 0.0067 | ssl1918  | GO:0007154 | 0.0047 | slr1533  | GO:0005216 | 0.0038 | ssl1255 | GO:0016829 | 0.0023 |
| slr0971  | GO:0006812 | 0.01   | slr0606  | GO:0016853 | 0.0067 | ssr7084  | GO:0007154 | 0.0047 | sl10780  | GO:0016829 | 0.0038 | sl10661 | GO:0016829 | 0.0023 |
| slr0924  | GO:0007154 | 0.01   | sl11863  | GO:0016853 | 0.0067 | slr1990  | GO:0007154 | 0.0047 | slr1262  | GO:0016829 | 0.0038 | sl10242 | GO:0004518 | 0.0023 |
| slr0924  | GO:0006812 | 0.01   | sl10167  | GO:0016853 | 0.0067 | sl10335  | GO:0007154 | 0.0047 | slr1612  | GO:0046873 | 0.0038 | sl11858 | GO:0016829 | 0.0023 |
| slr1070  | GO:0007154 | 0.01   | slr0142  | GO:0016853 | 0.0067 | sl10281  | GO:0006790 | 0.0047 | ssl10787 | GO:0005216 | 0.0038 | sl11737 | GO:0016829 | 0.0023 |
| slr0821  | GO:0006812 | 0.01   | sl10762  | GO:0016853 | 0.0067 | sl15069  | GO:0007154 | 0.0047 | sl10096  | GO:0046873 | 0.0038 | slr0491 | GO:0043169 | 0.0023 |
| sl11130  | GO:0006812 | 0.01   | slr7016  | GO:0016853 | 0.0067 | slr0169  | GO:0006790 | 0.0047 | slr0876  | GO:0046873 | 0.0038 | ssl1255 | GO:0043169 | 0.0023 |
| slr0232  | GO:0006812 | 0.01   | sl10293  | GO:0016853 | 0.0067 | slr0491  | GO:0006139 | 0.0047 | sl10283  | GO:0005216 | 0.0038 | slr1603 | GO:0043169 | 0.0023 |
| sl11659  | GO:0007154 | 0.01   | ssr7072  | GO:0016853 | 0.0067 | ssr6078  | GO:0007154 | 0.0047 | slr1081  | GO:0016829 | 0.0038 | ssr2049 | GO:0043169 | 0.0023 |
| sl10319  | GO:0007154 | 0.01   | slr6014  | GO:0016853 | 0.0067 | ssl2162  | GO:0007154 | 0.0047 | sl11613  | GO:0016829 | 0.0038 | ssr2049 | GO:0016829 | 0.0023 |
| slr1218  | GO:0006812 | 0.01   | ssl1498  | GO:0016853 | 0.0067 | sl11464  | GO:0007154 | 0.0047 | slr0287  | GO:0005216 | 0.0038 | sl11934 | GO:0043234 | 0.0023 |
| sl11203  | GO:0006812 | 0.01   | sl11252  | GO:0016853 | 0.0067 | slr7073  | GO:0007154 | 0.0047 | slr1799  | GO:0005216 | 0.0038 | slr1417 | GO:0043234 | 0.0023 |
| slr1660  | GO:0006812 | 0.01   | slr0959  | GO:0016853 | 0.0067 | slr6009  | GO:0007154 | 0.0047 | sl11442  | GO:0016829 | 0.0038 | sl11671 | GO:0043234 | 0.0023 |
| ssl2245  | GO:0006812 | 0.01   | slr1397  | GO:0016853 | 0.0067 | sl10405  | GO:0007154 | 0.0047 | sl10301  | GO:0005216 | 0.0038 | sl10864 | GO:0043234 | 0.0023 |
| sl15034  | GO:0006812 | 0.01   | sl11775  | GO:0008324 | 0.0067 | slr6088  | GO:0007154 | 0.0047 | ssr3532  | GO:0005216 | 0.0038 | sl10513 | GO:0043234 | 0.0023 |
| slr0980  | GO:0006950 | 0.01   | sl10913  | GO:0016853 | 0.0067 | slr5024  | GO:0007154 | 0.0047 | sl11315  | GO:0016829 | 0.0038 | slr0787 | GO:0043234 | 0.0023 |
| sl10752  | GO:0007154 | 0.01   | slr7014  | GO:0016853 | 0.0067 | ssr6083  | GO:0007154 | 0.0047 | slr1900  | GO:0046873 | 0.0038 | slr0250 | GO:0043234 | 0.0023 |
| sl10614  | GO:0006812 | 0.01   | slr1611  | GO:0016853 | 0.0067 | slr1259  | GO:0006790 | 0.0047 | sl11632  | GO:0016829 | 0.0038 | slr1799 | GO:0043234 | 0.0023 |
| sl17065  | GO:0007154 | 0.01   | sl10742  | GO:0016853 | 0.0067 | slr6081  | GO:0007154 | 0.0047 | slr1913  | GO:0016829 | 0.0038 | sl11715 | GO:0043234 | 0.0023 |
| sl10995  | GO:0007154 | 0.01   | slr6063  | GO:0016853 | 0.0067 | slr1690  | GO:0006790 | 0.0047 | sl10513  | GO:0046873 | 0.0038 | sl10854 | GO:0043234 | 0.0023 |
| slr1484  | GO:0006812 | 0.01   | ssr6026  | GO:0016853 | 0.0067 | ssl3829  | GO:0007154 | 0.0047 | sl10596  | GO:0046873 | 0.0038 | slr1107 | GO:0043234 | 0.0023 |
| sl11251  | GO:0006812 | 0.01   | slr1957  | GO:0016853 | 0.0067 | slr2003  | GO:0007154 | 0.0047 | sl11135  | GO:0046873 | 0.0038 | slr1023 | GO:0043234 | 0.0023 |
| ssr1552  | GO:0007154 | 0.01   | sgl0002  | GO:0016853 | 0.0067 | sl11164  | GO:0007154 | 0.0047 | slr1203  | GO:0016829 | 0.0038 | slr0545 | GO:0043234 | 0.0023 |
| slr1306  | GO:0006812 | 0.01   | slr0038  | GO:0016853 | 0.0067 | slr6106  | GO:0007154 | 0.0047 | sl11060  | GO:0005216 | 0.0038 | ssr1698 | GO:0043234 | 0.0023 |
| slr1110  | GO:0006950 | 0.01   | slr2038  | GO:0008324 | 0.0067 | slr1573  | GO:0043169 | 0.0047 | slr0545  | GO:0046873 | 0.0038 | sl11472 | GO:0043234 | 0.0023 |
| ssl15129 | GO:0006812 | 0.01   | sl15026  | GO:0016853 | 0.0067 | sl10524  | GO:0043169 | 0.0047 | slr1353  | GO:0005216 | 0.0038 | sl10508 | GO:0043234 | 0.0023 |
| slr1338  | GO:0007154 | 0.01   | sl10775  | GO:0016853 | 0.0067 | slr1073  | GO:0043169 | 0.0047 | slr0519  | GO:0016829 | 0.0038 | slr1917 | GO:0043234 | 0.0023 |
| ssl11792 | GO:0006812 | 0.01   | sl11306  | GO:0016853 | 0.0067 | sl10532  | GO:0043169 | 0.0047 | slr1593  | GO:0016829 | 0.0038 | sl11455 | GO:0043234 | 0.0023 |
| slr1429  | GO:0006812 | 0.01   | slr7025  | GO:0016853 | 0.0067 | ssr2551  | GO:0043169 | 0.0047 | slr1275  | GO:0016829 | 0.0038 | sl11942 | GO:0043234 | 0.0023 |
| slr0579  | GO:0006950 | 0.01   | sl11355  | GO:0016853 | 0.0067 | slr0294  | GO:0043169 | 0.0047 | slr1376  | GO:0005216 | 0.0038 | slr1557 | GO:0043234 | 0.0023 |
| sl10994  | GO:0006812 | 0.01   | slr0146  | GO:0016853 | 0.0067 | sl10780  | GO:0043169 | 0.0047 | slr1045  | GO:0005216 | 0.0038 | slr0076 | GO:0043234 | 0.0023 |
| slr1179  | GO:0006812 | 0.01   | ssl5045  | GO:0016853 | 0.0067 | slr0392  | GO:0043169 | 0.0047 | slr0913  | GO:0016829 | 0.0038 | sl10283 | GO:0043234 | 0.0023 |
| sl10218  | GO:0006812 | 0.01   | slr2119  | GO:0016853 | 0.0067 | slr2122  | GO:0043169 | 0.0047 | slr0305  | GO:0046873 | 0.0038 | slr0876 | GO:0043234 | 0.0023 |

|         |            |      |         |            |        |          |            |        |          |            |        |          |            |        |
|---------|------------|------|---------|------------|--------|----------|------------|--------|----------|------------|--------|----------|------------|--------|
| slr1864 | G0:0006812 | 0.01 | sl10269 | G0:0008324 | 0.0067 | sl10237  | G0:0043169 | 0.0047 | slr1638  | G0:0016829 | 0.0038 | slr0243  | G0:0043234 | 0.0023 |
| sl10909 | G0:0006812 | 0.01 | sl10102 | G0:0016853 | 0.0067 | ssl2065  | G0:0043169 | 0.0047 | sl11318  | G0:0005216 | 0.0038 | slr1896  | G0:0043234 | 0.0023 |
| sl11447 | G0:0006812 | 0.01 | slr5116 | G0:0016853 | 0.0067 | sl10325  | G0:0043169 | 0.0047 | slr1066  | G0:0046873 | 0.0038 | slr0287  | G0:0043234 | 0.0023 |
| slr1535 | G0:0006812 | 0.01 | slr0980 | G0:0008324 | 0.0067 | slr2111  | G0:0043169 | 0.0047 | sl11630  | G0:0016829 | 0.0038 | slr0157  | G0:0043234 | 0.0023 |
| slr1033 | G0:0007154 | 0.01 | ssr6048 | G0:0016853 | 0.0067 | sl10280  | G0:0043169 | 0.0047 | slr2025  | G0:0005216 | 0.0038 | slr2025  | G0:0043234 | 0.0023 |
| sl11399 | G0:0006812 | 0.01 | sl10443 | G0:0016853 | 0.0067 | slr0192  | G0:0043169 | 0.0047 | slr1530  | G0:0016829 | 0.0038 | slr0551  | G0:0043234 | 0.0023 |
| slr1288 | G0:0007154 | 0.01 | sl10282 | G0:0016853 | 0.0067 | slr2121  | G0:0043169 | 0.0047 | sl10985  | G0:0005975 | 0.0037 | sl11913  | G0:0043234 | 0.0023 |
| slr0358 | G0:0006812 | 0.01 | slr6005 | G0:0016853 | 0.0067 | sl10756  | G0:0043169 | 0.0047 | sl11455  | G0:0043169 | 0.0037 | sl10615  | G0:0043234 | 0.0023 |
| ssr2317 | G0:0006812 | 0.01 | ssl1004 | G0:0016853 | 0.0067 | sl10309  | G0:0043169 | 0.0047 | slr1900  | G0:0043169 | 0.0037 | slr1674  | G0:0043234 | 0.0023 |
| slr1209 | G0:0007154 | 0.01 | slr0398 | G0:0016853 | 0.0067 | sl11656  | G0:0043169 | 0.0047 | slr0852  | G0:0043169 | 0.0037 | sl11166  | G0:0043234 | 0.0023 |
| sl11735 | G0:0006812 | 0.01 | ssl5031 | G0:0016853 | 0.0067 | slr2144  | G0:0043169 | 0.0047 | slr1799  | G0:0043169 | 0.0037 | sl11426  | G0:0043234 | 0.0023 |
| slr0975 | G0:0007154 | 0.01 | sl10241 | G0:0016853 | 0.0067 | slr1614  | G0:0006807 | 0.0046 | slr1391  | G0:0043169 | 0.0037 | slr0852  | G0:0043234 | 0.0023 |
| slr0655 | G0:0006812 | 0.01 | slr1188 | G0:0016853 | 0.0067 | ssr5074  | G0:0004872 | 0.0046 | sl10263  | G0:0043169 | 0.0037 | slr1519  | G0:0043234 | 0.0023 |
| slr0505 | G0:0006812 | 0.01 | sl10024 | G0:0044267 | 0.0066 | slr2010  | G0:0005216 | 0.0046 | sl10148  | G0:0043169 | 0.0037 | slr0553  | G0:0043234 | 0.0023 |
| slr1032 | G0:0006950 | 0.01 | sl10428 | G0:0044267 | 0.0066 | slr1704  | G0:0004872 | 0.0046 | sl10513  | G0:0043169 | 0.0037 | slr1196  | G0:0043234 | 0.0023 |
| sl11241 | G0:0006812 | 0.01 | slr7081 | G0:0044267 | 0.0066 | slr1819  | G0:0004872 | 0.0046 | slr0545  | G0:0043169 | 0.0037 | sl10862  | G0:0043234 | 0.0023 |
| slr7080 | G0:0006812 | 0.01 | slr1068 | G0:0044267 | 0.0066 | sl11898  | G0:0004872 | 0.0046 | sl10743  | G0:0043169 | 0.0037 | slr0480  | G0:0043234 | 0.0023 |
| sl11654 | G0:0006812 | 0.01 | ssl5129 | G0:0044267 | 0.0066 | sl11174  | G0:0016853 | 0.0046 | sl11433  | G0:0043169 | 0.0037 | slr0209  | G0:0043234 | 0.0023 |
| sl11696 | G0:0006812 | 0.01 | slr0398 | G0:0044267 | 0.0066 | ssr2975  | G0:0004872 | 0.0046 | sl10996  | G0:0043169 | 0.0037 | slr1505  | G0:0043234 | 0.0023 |
| sl17063 | G0:0006812 | 0.01 | ssr7036 | G0:0044267 | 0.0066 | sl11022  | G0:0005216 | 0.0046 | slr0305  | G0:0043169 | 0.0037 | sl11174  | G0:0043234 | 0.0023 |
| sl10911 | G0:0007154 | 0.01 | slr7096 | G0:0044267 | 0.0066 | sl110609 | G0:0005216 | 0.0046 | sl11219  | G0:0043169 | 0.0037 | sl11218  | G0:0043234 | 0.0023 |
| slr1397 | G0:0006812 | 0.01 | ssr3409 | G0:0044267 | 0.0066 | slr0976  | G0:0016810 | 0.0046 | sl10854  | G0:0043169 | 0.0037 | ssr0536  | G0:0043234 | 0.0023 |
| slr1338 | G0:0006812 | 0.01 | slr1864 | G0:0044267 | 0.0066 | slr1923  | G0:0005216 | 0.0046 | ssr2848  | G0:0043169 | 0.0037 | sl12006  | G0:0043234 | 0.0023 |
| sl11232 | G0:0006812 | 0.01 | sl11162 | G0:0044267 | 0.0066 | ssl5100  | G0:0016810 | 0.0046 | slr1917  | G0:0043169 | 0.0037 | slr1127  | G0:0043234 | 0.0023 |
| slr0935 | G0:0007154 | 0.01 | slr1464 | G0:0044267 | 0.0066 | slr1114  | G0:0016810 | 0.0046 | slr1045  | G0:0043169 | 0.0037 | slr0211  | G0:0043234 | 0.0023 |
| slr0059 | G0:0006812 | 0.01 | slr1260 | G0:0044267 | 0.0066 | slr6067  | G0:0005216 | 0.0046 | slr0937  | G0:0043169 | 0.0037 | ssr2848  | G0:0043234 | 0.0023 |
| slr1288 | G0:0006812 | 0.01 | slr1095 | G0:0044267 | 0.0066 | ssr2848  | G0:0016853 | 0.0046 | sl11542  | G0:0043169 | 0.0037 | slr1866  | G0:0043234 | 0.0023 |
| slr1462 | G0:0006812 | 0.01 | sgl0002 | G0:0044267 | 0.0066 | ssr5011  | G0:0016810 | 0.0046 | slr1194  | G0:0043169 | 0.0037 | slr1376  | G0:0043234 | 0.0023 |
| sl11119 | G0:0006950 | 0.01 | sl15032 | G0:0044267 | 0.0066 | slr1537  | G0:0004872 | 0.0046 | slr1066  | G0:0043169 | 0.0037 | slr0305  | G0:0043234 | 0.0023 |
| ssr2009 | G0:0007154 | 0.01 | slr0199 | G0:0044267 | 0.0066 | slr1674  | G0:0016853 | 0.0046 | sl10301  | G0:0043169 | 0.0037 | slr0937  | G0:0043234 | 0.0023 |
| slr0053 | G0:0007154 | 0.01 | slr7023 | G0:0044267 | 0.0066 | slr0440  | G0:0005216 | 0.0046 | sl11135  | G0:0043169 | 0.0037 | ssl3692  | G0:0043234 | 0.0023 |
| sl15047 | G0:0006812 | 0.01 | ssl1972 | G0:0044267 | 0.0066 | slr0651  | G0:0016810 | 0.0046 | slr1450  | G0:0044267 | 0.0036 | sl10148  | G0:0043234 | 0.0023 |
| slr0442 | G0:0006950 | 0.01 | slr0619 | G0:0044267 | 0.0066 | slr1627  | G0:0016810 | 0.0046 | ssl17046 | G0:0006520 | 0.0036 | ssl0787  | G0:0043234 | 0.0023 |
| slr0702 | G0:0006812 | 0.01 | slr0148 | G0:0044267 | 0.0066 | sl11307  | G0:0016810 | 0.0046 | slr0789  | G0:0044249 | 0.0036 | sl11135  | G0:0043234 | 0.0023 |
| sl10281 | G0:0007154 | 0.01 | slr0784 | G0:0044267 | 0.0066 | slr1406  | G0:0004872 | 0.0046 | ssr6030  | G0:0044267 | 0.0036 | sl10424  | G0:0043234 | 0.0023 |
| ssr1552 | G0:0006812 | 0.01 | slr1342 | G0:0044267 | 0.0066 | sl11095  | G0:0004872 | 0.0046 | slr1470  | G0:0006520 | 0.0036 | slr0423  | G0:0043234 | 0.0023 |
| sl11658 | G0:0008324 | 0.01 | sl10811 | G0:0044267 | 0.0066 | sl110611 | G0:0005216 | 0.0046 | sl115062 | G0:0006520 | 0.0036 | ssr0336  | G0:0044238 | 0.0022 |
| slr1210 | G0:0008324 | 0.01 | slr1306 | G0:0044267 | 0.0066 | slr0606  | G0:0005216 | 0.0046 | slr2070  | G0:0044267 | 0.0036 | slr5016  | G0:0044238 | 0.0022 |
| slr1177 | G0:0016810 | 0.01 | slr7037 | G0:0044267 | 0.0066 | sl11142  | G0:0004872 | 0.0046 | ssr6079  | G0:0006520 | 0.0036 | ssr5106  | G0:0044238 | 0.0022 |
| sl11965 | G0:0016810 | 0.01 | slr1195 | G0:0044267 | 0.0066 | sl110405 | G0:0004872 | 0.0046 | slr0142  | G0:0006520 | 0.0036 | slr6044  | G0:0006725 | 0.0022 |
| slr1275 | G0:0008324 | 0.01 | slr8014 | G0:0044267 | 0.0066 | sl110160 | G0:0016810 | 0.0046 | slr1753  | G0:0006520 | 0.0036 | sl10670  | G0:0006725 | 0.0022 |
| sl11315 | G0:0008324 | 0.01 | slr0489 | G0:0044267 | 0.0066 | slr11127 | G0:0016853 | 0.0046 | sl10218  | G0:0006520 | 0.0036 | ssr7093  | G0:0006725 | 0.0022 |
| sl10676 | G0:0008324 | 0.01 | slr1600 | G0:0044267 | 0.0066 | sl11318  | G0:0016853 | 0.0046 | slr7100  | G0:0044267 | 0.0036 | sl11106  | G0:0044238 | 0.0022 |
| sl10780 | G0:0016810 | 0.01 | sl11797 | G0:0044267 | 0.0066 | sl10253  | G0:0016810 | 0.0046 | sl117078 | G0:0044267 | 0.0036 | slr1935  | G0:0006725 | 0.0022 |
| ssl2065 | G0:0008324 | 0.01 | sl11863 | G0:0044267 | 0.0066 | slr5101  | G0:0004872 | 0.0046 | sl117031 | G0:0044267 | 0.0036 | slr6028  | G0:0006725 | 0.0022 |
| sl10756 | G0:0008324 | 0.01 | ssr1407 | G0:0044267 | 0.0066 | ssl1520  | G0:0005216 | 0.0046 | sl111049 | G0:0044267 | 0.0036 | sl11698  | G0:0044238 | 0.0022 |
| slr0668 | G0:0008324 | 0.01 | sl11396 | G0:0044267 | 0.0066 | sl110984 | G0:0004872 | 0.0046 | ssl5100  | G0:0044267 | 0.0036 | slr7023  | G0:0006725 | 0.0022 |
| slr0392 | G0:0008324 | 0.01 | slr0552 | G0:0044267 | 0.0066 | sl112011 | G0:0016810 | 0.0046 | slr0521  | G0:0044267 | 0.0036 | slr1170  | G0:0044238 | 0.0022 |
| slr0192 | G0:0008324 | 0.01 | slr0333 | G0:0044267 | 0.0066 | sl117063 | G0:0005216 | 0.0046 | ssl18028 | G0:0044267 | 0.0036 | sl115132 | G0:0044238 | 0.0022 |
| slr0364 | G0:0008324 | 0.01 | ssr1499 | G0:0044267 | 0.0066 | slr0313  | G0:0004872 | 0.0046 | sl11921  | G0:0006520 | 0.0036 | slr5018  | G0:0006725 | 0.0022 |
| slr0770 | G0:0008324 | 0.01 | ssr0102 | G0:0044267 | 0.0066 | sl111132 | G0:0005216 | 0.0046 | sl111158 | G0:0044267 | 0.0036 | slr0199  | G0:0006725 | 0.0022 |
| sl10381 | G0:0016810 | 0.01 | ssl1923 | G0:0044267 | 0.0066 | sl111681 | G0:0004872 | 0.0046 | ssr2611  | G0:0006520 | 0.0036 | slr0325  | G0:0044238 | 0.0022 |
| slr0006 | G0:0016810 | 0.01 | slr5119 | G0:0044267 | 0.0066 | slr1990  | G0:0016810 | 0.0046 | slr1704  | G0:0044267 | 0.0036 | slr0142  | G0:0006725 | 0.0022 |
| slr0204 | G0:0008324 | 0.01 | slr0959 | G0:0044267 | 0.0066 | slr0039  | G0:0016810 | 0.0046 | sl111192 | G0:0044267 | 0.0036 | slr5016  | G0:0006725 | 0.0022 |

|         |            |        |         |            |        |         |            |        |         |            |        |         |            |        |
|---------|------------|--------|---------|------------|--------|---------|------------|--------|---------|------------|--------|---------|------------|--------|
| ss10242 | GO:0008324 | 0.01   | s110241 | GO:0044267 | 0.0066 | s1r2004 | GO:0004872 | 0.0046 | s110189 | GO:0044249 | 0.0036 | ss17046 | GO:0006725 | 0.0022 |
| ss10352 | GO:0008324 | 0.01   | s1r1920 | GO:0044267 | 0.0066 | s1r1863 | GO:0005216 | 0.0046 | s1r1378 | GO:0006520 | 0.0036 | s1r7082 | GO:0006725 | 0.0022 |
| s1r1203 | GO:0008324 | 0.01   | s1r1468 | GO:0044267 | 0.0066 | ssr7079 | GO:0004872 | 0.0046 | s1r6047 | GO:0006520 | 0.0036 | s1r1472 | GO:0006725 | 0.0022 |
| s111530 | GO:0008324 | 0.01   | s110846 | GO:0044267 | 0.0066 | s1r0304 | GO:0016853 | 0.0046 | s111174 | GO:0006790 | 0.0036 | s1r6047 | GO:0006725 | 0.0022 |
| s111061 | GO:0016810 | 0.01   | s1r6049 | GO:0044267 | 0.0066 | s1r0865 | GO:0004872 | 0.0046 | s1r6016 | GO:0044267 | 0.0036 | ss12138 | GO:0044238 | 0.0022 |
| s111613 | GO:0016810 | 0.01   | s111446 | GO:0008233 | 0.0066 | ssr0657 | GO:0016810 | 0.0046 | s1r2125 | GO:0044249 | 0.0036 | s115069 | GO:0006725 | 0.0022 |
| ssr2755 | GO:0016810 | 0.01   | s110446 | GO:0008233 | 0.0066 | ss11690 | GO:0016810 | 0.0046 | s1r7015 | GO:0006520 | 0.0036 | s1r0334 | GO:0044238 | 0.0022 |
| s1r1530 | GO:0008324 | 0.01   | s111995 | GO:0016874 | 0.0066 | ssr6083 | GO:0004872 | 0.0046 | s1r6081 | GO:0044267 | 0.0036 | ss17022 | GO:0006725 | 0.0022 |
| s110010 | GO:0016810 | 0.01   | s1r1644 | GO:0016772 | 0.0066 | s111109 | GO:0005216 | 0.0046 | s1r0480 | GO:0006790 | 0.0036 | s1r1186 | GO:0006725 | 0.0022 |
| s111002 | GO:0008324 | 0.01   | s111272 | GO:0016874 | 0.0066 | ssr6078 | GO:0004872 | 0.0046 | s110761 | GO:0006520 | 0.0036 | s1r2103 | GO:0006725 | 0.0022 |
| s1r0023 | GO:0016810 | 0.01   | s1r1591 | GO:0016874 | 0.0066 | s111939 | GO:0005216 | 0.0046 | s111400 | GO:0006520 | 0.0036 | s110286 | GO:0044262 | 0.0022 |
| s110944 | GO:0008324 | 0.01   | s1r1774 | GO:0016874 | 0.0066 | s1r0209 | GO:0016853 | 0.0046 | s110710 | GO:0006520 | 0.0036 | s110294 | GO:0006725 | 0.0022 |
| s1r0586 | GO:0016810 | 0.01   | s110656 | GO:0016874 | 0.0066 | s111381 | GO:0016810 | 0.0046 | s111054 | GO:0044249 | 0.0036 | s110625 | GO:0006725 | 0.0022 |
| s110785 | GO:0016810 | 0.01   | s1r0818 | GO:0008233 | 0.0066 | s1r1513 | GO:0016810 | 0.0046 | s110615 | GO:0006790 | 0.0036 | s1r7013 | GO:0006725 | 0.0022 |
| s111315 | GO:0016810 | 0.01   | s110735 | GO:0016874 | 0.0066 | s111254 | GO:0004872 | 0.0046 | s117050 | GO:0044267 | 0.0036 | ss17038 | GO:0006725 | 0.0022 |
| s111530 | GO:0016810 | 0.01   | s117086 | GO:0015031 | 0.0065 | s1r0291 | GO:0016810 | 0.0046 | ssr6078 | GO:0044267 | 0.0036 | ss11378 | GO:0044238 | 0.0022 |
| s1r1436 | GO:0016810 | 0.01   | s118035 | GO:0015031 | 0.0065 | ss15065 | GO:0005216 | 0.0046 | s110765 | GO:0044267 | 0.0036 | s118027 | GO:0044238 | 0.0022 |
| s110325 | GO:0008324 | 0.01   | s1r5077 | GO:0015031 | 0.0065 | ssr2998 | GO:0016810 | 0.0046 | s1r1493 | GO:0044249 | 0.0036 | s111939 | GO:0006725 | 0.0022 |
| ssr1765 | GO:0016810 | 0.01   | s118040 | GO:0015031 | 0.0065 | s110436 | GO:0005216 | 0.0046 | s117066 | GO:0006520 | 0.0036 | s111380 | GO:0044238 | 0.0022 |
| s1r0723 | GO:0008324 | 0.01   | ssr5121 | GO:0015031 | 0.0065 | s1r6106 | GO:0016810 | 0.0046 | s1r1315 | GO:0006520 | 0.0036 | s1r0780 | GO:0006725 | 0.0022 |
| s110237 | GO:0008324 | 0.01   | s1r1970 | GO:0015031 | 0.0065 | s110479 | GO:0004872 | 0.0046 | s111217 | GO:0006520 | 0.0036 | s118033 | GO:0006725 | 0.0022 |
| s110982 | GO:0016810 | 0.01   | s1r0270 | GO:0015031 | 0.0065 | ssr6078 | GO:0016810 | 0.0046 | s117064 | GO:0006520 | 0.0036 | ssr1473 | GO:0006725 | 0.0022 |
| s1r2111 | GO:0016810 | 0.01   | s117034 | GO:0015031 | 0.0065 | s111884 | GO:0005216 | 0.0046 | s1r0592 | GO:0006520 | 0.0036 | ssr1768 | GO:0006725 | 0.0022 |
| s1r0294 | GO:0016810 | 0.01   | s1r1886 | GO:0015031 | 0.0065 | ssr1155 | GO:0004872 | 0.0046 | s1r1799 | GO:0006790 | 0.0036 | s117089 | GO:0006725 | 0.0022 |
| s1r2111 | GO:0008324 | 0.01   | s111640 | GO:0015031 | 0.0065 | s111062 | GO:0005216 | 0.0046 | s111640 | GO:0044267 | 0.0036 | s1r0667 | GO:0044238 | 0.0022 |
| s1r1084 | GO:0008324 | 0.01   | s1r0241 | GO:0015031 | 0.0065 | s111606 | GO:0005216 | 0.0046 | s1r0810 | GO:0006886 | 0.0036 | ss11046 | GO:0044238 | 0.0022 |
| s1r1266 | GO:0016810 | 0.01   | ss16035 | GO:0015031 | 0.0065 | s110710 | GO:0005216 | 0.0046 | s111925 | GO:0044249 | 0.0036 | s1r0273 | GO:0006725 | 0.0022 |
| s110085 | GO:0008324 | 0.01   | s115028 | GO:0015031 | 0.0065 | s1r1721 | GO:0005216 | 0.0046 | s1r0780 | GO:0044267 | 0.0036 | s1r8022 | GO:0006725 | 0.0022 |
| s110198 | GO:0016810 | 0.01   | s115069 | GO:0015031 | 0.0065 | s110630 | GO:0005216 | 0.0046 | s1r7060 | GO:0044267 | 0.0036 | s1r6080 | GO:0006725 | 0.0022 |
| s1r1230 | GO:0016810 | 0.01   | ss11918 | GO:0015031 | 0.0065 | s117078 | GO:0016810 | 0.0046 | s1r0455 | GO:0044249 | 0.0036 | s1r7026 | GO:0006725 | 0.0022 |
| s1r0404 | GO:0008324 | 0.01   | s1r1449 | GO:0015031 | 0.0065 | s1r0082 | GO:0016810 | 0.0046 | s1r1391 | GO:0006790 | 0.0036 | ss17045 | GO:0044238 | 0.0022 |
| ss12807 | GO:0016810 | 0.01   | ssr0657 | GO:0015031 | 0.0065 | s111571 | GO:0005216 | 0.0046 | s1r1068 | GO:0006520 | 0.0036 | s1r1110 | GO:0044262 | 0.0022 |
| s111086 | GO:0008324 | 0.01   | s117070 | GO:0015031 | 0.0065 | ss11464 | GO:0005216 | 0.0046 | s110539 | GO:0044249 | 0.0036 | s110376 | GO:0044238 | 0.0022 |
| s110985 | GO:0003723 | 0.01   | s1r0725 | GO:0015031 | 0.0065 | s1r1944 | GO:0004872 | 0.0046 | s1r0300 | GO:0044267 | 0.0036 | s1r1079 | GO:0044238 | 0.0022 |
| s111086 | GO:0016810 | 0.01   | s1r5127 | GO:0015031 | 0.0065 | s110815 | GO:0005216 | 0.0046 | s1r0199 | GO:0006520 | 0.0036 | ssr8013 | GO:0044238 | 0.0022 |
| s110645 | GO:0008324 | 0.01   | s110625 | GO:0015031 | 0.0065 | ssr8047 | GO:0016810 | 0.0046 | s1r1875 | GO:0044267 | 0.0036 | s1r1864 | GO:0006725 | 0.0022 |
| s110785 | GO:0008324 | 0.01   | s1r1670 | GO:0015031 | 0.0065 | s1r2000 | GO:0016810 | 0.0046 | s110625 | GO:0044267 | 0.0036 | s111692 | GO:0006725 | 0.0022 |
| ssr3122 | GO:0008324 | 0.01   | ssr7017 | GO:0015031 | 0.0065 | sg10001 | GO:0005216 | 0.0046 | sm10011 | GO:0044249 | 0.0036 | s110328 | GO:0006725 | 0.0022 |
| s111835 | GO:0016810 | 0.01   | s111254 | GO:0015031 | 0.0065 | s1r0380 | GO:0005216 | 0.0046 | s1r0517 | GO:0044267 | 0.0036 | s1r0655 | GO:0006725 | 0.0022 |
| s1r1073 | GO:0008324 | 0.01   | s1r6028 | GO:0015031 | 0.0065 | s1r0398 | GO:0005216 | 0.0046 | s110595 | GO:0044249 | 0.0036 | s117087 | GO:0044238 | 0.0022 |
| s1r0103 | GO:0008324 | 0.01   | s117033 | GO:0015031 | 0.0065 | s1r0813 | GO:0016810 | 0.0046 | s1r0059 | GO:0006520 | 0.0036 | s110913 | GO:0006725 | 0.0022 |
| s1r1788 | GO:0016810 | 0.01   | s111834 | GO:0015031 | 0.0065 | s111162 | GO:0005216 | 0.0046 | s111763 | GO:0019538 | 0.0036 | s1r0959 | GO:0006725 | 0.0022 |
| s1r1262 | GO:0008324 | 0.01   | ssr6086 | GO:0015031 | 0.0065 | s1r1951 | GO:0016810 | 0.0046 | s1r0588 | GO:0044267 | 0.0036 | s110423 | GO:0006725 | 0.0022 |
| s1r1081 | GO:0008324 | 0.01   | s111321 | GO:0015031 | 0.0065 | s1r1178 | GO:0005216 | 0.0046 | s117065 | GO:0044249 | 0.0036 | s115063 | GO:0044238 | 0.0022 |
| ss12807 | GO:0007154 | 0.0098 | ss17007 | GO:0015031 | 0.0065 | s1r1472 | GO:0005216 | 0.0046 | s110162 | GO:0044267 | 0.0036 | s1r0271 | GO:0006725 | 0.0022 |
| s110243 | GO:0007154 | 0.0098 | ss18039 | GO:0015031 | 0.0065 | s1r5127 | GO:0004872 | 0.0046 | s1r5116 | GO:0006520 | 0.0036 | s117055 | GO:0044238 | 0.0022 |
| s1r2121 | GO:0007154 | 0.0098 | s115109 | GO:0015031 | 0.0065 | s110167 | GO:0005216 | 0.0046 | s110614 | GO:0044249 | 0.0036 | s1r1095 | GO:0006725 | 0.0022 |
| s1r1880 | GO:0007154 | 0.0098 | ssr1558 | GO:0015031 | 0.0065 | s110397 | GO:0005216 | 0.0046 | s1r2049 | GO:0044267 | 0.0036 | s110405 | GO:0044238 | 0.0022 |
| s110309 | GO:0007154 | 0.0098 | ss11046 | GO:0015031 | 0.0065 | s1r6028 | GO:0004872 | 0.0046 | s115130 | GO:0006520 | 0.0036 | s118011 | GO:0044238 | 0.0022 |
| s110280 | GO:0007154 | 0.0098 | s111009 | GO:0015031 | 0.0065 | s1r1677 | GO:0005216 | 0.0046 | s111340 | GO:0044267 | 0.0036 | s110498 | GO:0006725 | 0.0022 |
| ssr3122 | GO:0007154 | 0.0098 | s110939 | GO:0015031 | 0.0065 | s1r1570 | GO:0016810 | 0.0046 | s1r1116 | GO:0006520 | 0.0036 | s115062 | GO:0006725 | 0.0022 |
| s110524 | GO:0007154 | 0.0098 | s1r6087 | GO:0015031 | 0.0065 | s111940 | GO:0016810 | 0.0046 | ss10294 | GO:0019538 | 0.0036 | s1r6045 | GO:0044238 | 0.0022 |
| s1r0668 | GO:0007154 | 0.0098 | s1r6104 | GO:0015031 | 0.0065 | s1r7091 | GO:0016810 | 0.0046 | s115003 | GO:0044267 | 0.0036 | s110479 | GO:0006725 | 0.0022 |
| s110325 | GO:0007154 | 0.0098 | ssr0761 | GO:0015031 | 0.0065 | ssr7017 | GO:0016810 | 0.0046 | s111882 | GO:0044267 | 0.0036 | s110168 | GO:0006725 | 0.0022 |

|         |            |        |         |            |        |         |            |        |         |            |        |         |            |        |
|---------|------------|--------|---------|------------|--------|---------|------------|--------|---------|------------|--------|---------|------------|--------|
| slr1999 | GO:0007154 | 0.0098 | slr1056 | GO:0015031 | 0.0065 | slr1911 | GO:0004872 | 0.0046 | slr1218 | GO:0006520 | 0.0036 | ssr2201 | GO:0044262 | 0.0022 |
| slr0845 | GO:0007154 | 0.0098 | s110031 | GO:0015031 | 0.0065 | slr0106 | GO:0004872 | 0.0046 | s111389 | GO:0006520 | 0.0036 | slr5077 | GO:0044238 | 0.0022 |
| s111563 | GO:0007154 | 0.0098 | slr1780 | GO:0015031 | 0.0065 | ssr3129 | GO:0004872 | 0.0046 | s110994 | GO:0006520 | 0.0036 | slr1886 | GO:0006725 | 0.0022 |
| slr1385 | GO:0016874 | 0.0098 | s115003 | GO:0015031 | 0.0065 | slr0865 | GO:0016810 | 0.0046 | slr0637 | GO:0044267 | 0.0036 | s111062 | GO:0006725 | 0.0022 |
| s111858 | GO:0016874 | 0.0098 | ssr6030 | GO:0015031 | 0.0065 | slr1168 | GO:0005216 | 0.0046 | slr1513 | GO:0044267 | 0.0036 | slr1563 | GO:0044238 | 0.0022 |
| ss11255 | GO:0016874 | 0.0098 | slr6016 | GO:0015031 | 0.0065 | slr1261 | GO:0005216 | 0.0046 | s110749 | GO:0044267 | 0.0036 | slr0976 | GO:0044238 | 0.0022 |
| slr0810 | GO:0016874 | 0.0098 | s111131 | GO:0015031 | 0.0065 | ss11690 | GO:0004872 | 0.0046 | slr0769 | GO:0006520 | 0.0036 | s110478 | GO:0006725 | 0.0022 |
| slr1603 | GO:0016874 | 0.0098 | slr1875 | GO:0015031 | 0.0065 | slr2070 | GO:0004872 | 0.0046 | s111380 | GO:0044267 | 0.0036 | s118001 | GO:0044238 | 0.0022 |
| ssr2843 | GO:0016874 | 0.0098 | ss12162 | GO:0015031 | 0.0065 | slr1896 | GO:0016853 | 0.0046 | slr1079 | GO:0044267 | 0.0036 | slr0907 | GO:0006725 | 0.0022 |
| s111737 | GO:0016874 | 0.0098 | s111142 | GO:0015031 | 0.0065 | slr0708 | GO:0004872 | 0.0046 | slr0784 | GO:0006520 | 0.0036 | slr1425 | GO:0006725 | 0.0022 |
| slr0341 | GO:0016874 | 0.0098 | slr2117 | GO:0015031 | 0.0065 | slr6068 | GO:0004872 | 0.0046 | s111247 | GO:0006790 | 0.0036 | s110060 | GO:0006725 | 0.0022 |
| slr0592 | GO:0006629 | 0.0097 | s118001 | GO:0015031 | 0.0065 | s111095 | GO:0016810 | 0.0046 | slr1070 | GO:0044249 | 0.0036 | ssr2972 | GO:0044238 | 0.0022 |
| s110518 | GO:0006629 | 0.0097 | ss10467 | GO:0015031 | 0.0065 | slr5023 | GO:0005216 | 0.0046 | s110230 | GO:0044267 | 0.0036 | ss17042 | GO:0006725 | 0.0022 |
| slr1162 | GO:0006629 | 0.0097 | slr0208 | GO:0015031 | 0.0064 | s117070 | GO:0004872 | 0.0046 | slr1566 | GO:0006520 | 0.0036 | ss11552 | GO:0044238 | 0.0022 |
| slr1306 | GO:0006629 | 0.0097 | ssr1258 | GO:0015031 | 0.0064 | s111142 | GO:0016810 | 0.0046 | s117077 | GO:0044267 | 0.0036 | slr1737 | GO:0044238 | 0.0022 |
| s111510 | GO:0006629 | 0.0097 | slr0579 | GO:0015031 | 0.0064 | s110048 | GO:0005216 | 0.0046 | sg10001 | GO:0006520 | 0.0036 | slr0865 | GO:0044238 | 0.0022 |
| ssr3409 | GO:0006629 | 0.0097 | slr1495 | GO:0015031 | 0.0064 | s111036 | GO:0004872 | 0.0046 | s118011 | GO:0044267 | 0.0036 | s118012 | GO:0044238 | 0.0022 |
| s110102 | GO:0006629 | 0.0097 | ssr2781 | GO:0006164 | 0.0064 | s111797 | GO:0005216 | 0.0046 | ssr2975 | GO:0044267 | 0.0036 | slr0400 | GO:0006725 | 0.0022 |
| s110860 | GO:0006629 | 0.0097 | s111071 | GO:0005216 | 0.0064 | s111433 | GO:0016853 | 0.0046 | s110735 | GO:0015031 | 0.0036 | slr1378 | GO:0006725 | 0.0022 |
| slr2119 | GO:0006629 | 0.0097 | slr1862 | GO:0005216 | 0.0064 | slr7016 | GO:0005216 | 0.0046 | s111906 | GO:0006520 | 0.0036 | ssr6048 | GO:0006725 | 0.0022 |
| s111355 | GO:0006629 | 0.0097 | s110412 | GO:0005216 | 0.0064 | ssr6048 | GO:0005216 | 0.0046 | s111142 | GO:0044267 | 0.0036 | ssr2318 | GO:0044238 | 0.0022 |
| s111025 | GO:0006629 | 0.0097 | s111582 | GO:0005216 | 0.0064 | slr5018 | GO:0005216 | 0.0046 | slr1668 | GO:0044249 | 0.0036 | slr8022 | GO:0044238 | 0.0022 |
| slr6080 | GO:0006629 | 0.0097 | slr1690 | GO:0005216 | 0.0064 | s111609 | GO:0004872 | 0.0046 | slr1442 | GO:0044267 | 0.0036 | ssr6026 | GO:0006725 | 0.0022 |
| ssr1951 | GO:0006629 | 0.0097 | s110156 | GO:0005216 | 0.0064 | s111217 | GO:0005216 | 0.0046 | slr1519 | GO:0006790 | 0.0036 | slr5127 | GO:0044238 | 0.0022 |
| slr0964 | GO:0006629 | 0.0097 | s111399 | GO:0005216 | 0.0064 | s115044 | GO:0005216 | 0.0046 | ssr7093 | GO:0044267 | 0.0036 | s110553 | GO:0006725 | 0.0022 |
| s111571 | GO:0006629 | 0.0097 | slr0664 | GO:0005216 | 0.0064 | slr6090 | GO:0005216 | 0.0046 | s111891 | GO:0044267 | 0.0036 | s110162 | GO:0044238 | 0.0022 |
| s111401 | GO:0006629 | 0.0097 | s110319 | GO:0005216 | 0.0064 | slr5024 | GO:0016810 | 0.0046 | ss18008 | GO:0044249 | 0.0036 | slr0509 | GO:0006725 | 0.0022 |
| slr5017 | GO:0006629 | 0.0097 | s110787 | GO:0005216 | 0.0064 | ssr0761 | GO:0016810 | 0.0046 | slr1376 | GO:0006790 | 0.0036 | s110793 | GO:0006725 | 0.0022 |
| s111651 | GO:0006629 | 0.0097 | slr1240 | GO:0005216 | 0.0064 | slr8014 | GO:0005216 | 0.0046 | sg10002 | GO:0006520 | 0.0036 | slr1623 | GO:0044238 | 0.0022 |
| s117063 | GO:0006629 | 0.0097 | slr0962 | GO:0005216 | 0.0064 | slr6065 | GO:0005216 | 0.0046 | s111131 | GO:0044267 | 0.0036 | ssr3402 | GO:0044238 | 0.0022 |
| s110802 | GO:0006629 | 0.0097 | slr0373 | GO:0005216 | 0.0064 | slr0598 | GO:0005216 | 0.0046 | slr1327 | GO:0044267 | 0.0036 | slr0356 | GO:0006725 | 0.0022 |
| slr6007 | GO:0006629 | 0.0097 | s111390 | GO:0005216 | 0.0064 | sg10002 | GO:0005216 | 0.0046 | s117062 | GO:0006520 | 0.0036 | slr1174 | GO:0044238 | 0.0022 |
| slr6066 | GO:0006629 | 0.0097 | slr1053 | GO:0005216 | 0.0064 | slr1407 | GO:0005216 | 0.0046 | s111765 | GO:0006520 | 0.0036 | slr0148 | GO:0006725 | 0.0022 |
| ss13451 | GO:0006629 | 0.0097 | s110995 | GO:0005216 | 0.0064 | s111573 | GO:0004872 | 0.0046 | s110939 | GO:0044267 | 0.0036 | s111834 | GO:0044238 | 0.0022 |
| ss15099 | GO:0006629 | 0.0097 | slr1383 | GO:0005216 | 0.0064 | s111942 | GO:0016853 | 0.0046 | slr0272 | GO:0044249 | 0.0036 | s117070 | GO:0006725 | 0.0022 |
| slr1958 | GO:0006629 | 0.0097 | s111304 | GO:0005216 | 0.0064 | s110102 | GO:0005216 | 0.0046 | s117030 | GO:0044267 | 0.0036 | slr1737 | GO:0006725 | 0.0022 |
| s111163 | GO:0006629 | 0.0097 | s110980 | GO:0005216 | 0.0064 | slr5111 | GO:0016810 | 0.0046 | slr2110 | GO:0044267 | 0.0036 | ss10294 | GO:0007154 | 0.0022 |
| ssr2422 | GO:0006629 | 0.0097 | s110564 | GO:0005216 | 0.0064 | slr0656 | GO:0004872 | 0.0046 | slr0285 | GO:0044267 | 0.0036 | slr6012 | GO:0044238 | 0.0022 |
| slr7095 | GO:0006629 | 0.0097 | s111225 | GO:0005216 | 0.0064 | ss16035 | GO:0016810 | 0.0046 | ssr0692 | GO:0015031 | 0.0036 | s111486 | GO:0006725 | 0.0022 |
| slr1397 | GO:0006629 | 0.0097 | ssr1552 | GO:0005216 | 0.0064 | s110174 | GO:0005216 | 0.0046 | slr1196 | GO:0006790 | 0.0036 | s111285 | GO:0006725 | 0.0022 |
| slr1168 | GO:0006629 | 0.0097 | slr0815 | GO:0005216 | 0.0064 | s110296 | GO:0016853 | 0.0046 | ss15064 | GO:0044267 | 0.0036 | ss12384 | GO:0044238 | 0.0022 |
| slr0505 | GO:0006629 | 0.0097 | slr1590 | GO:0005216 | 0.0064 | slr1737 | GO:0004872 | 0.0046 | ssr3572 | GO:0044267 | 0.0036 | s115004 | GO:0044238 | 0.0022 |
| s110846 | GO:0006629 | 0.0097 | s111925 | GO:0005216 | 0.0064 | ss17022 | GO:0016810 | 0.0046 | s110478 | GO:0006520 | 0.0036 | slr1537 | GO:0006725 | 0.0022 |
| s110751 | GO:0006629 | 0.0097 | slr1074 | GO:0005216 | 0.0064 | s111106 | GO:0016810 | 0.0046 | ssr5020 | GO:0006520 | 0.0036 | slr1535 | GO:0006725 | 0.0022 |
| slr1956 | GO:0006629 | 0.0097 | s111634 | GO:0005216 | 0.0064 | slr1207 | GO:0005216 | 0.0046 | slr1896 | GO:0006790 | 0.0036 | slr6016 | GO:0006725 | 0.0022 |
| s110760 | GO:0006629 | 0.0097 | s110359 | GO:0005216 | 0.0064 | slr8021 | GO:0016810 | 0.0046 | s110513 | GO:0006790 | 0.0036 | s111652 | GO:0006725 | 0.0022 |
| slr0179 | GO:0006629 | 0.0097 | ssr3300 | GO:0005216 | 0.0064 | slr0870 | GO:0005216 | 0.0046 | s111715 | GO:0006790 | 0.0036 | slr5126 | GO:0044238 | 0.0022 |
| s111062 | GO:0006629 | 0.0097 | slr0680 | GO:0005216 | 0.0064 | slr0960 | GO:0005216 | 0.0046 | s111135 | GO:0006790 | 0.0036 | slr1577 | GO:0044238 | 0.0022 |
| ss11464 | GO:0006629 | 0.0097 | slr0554 | GO:0005216 | 0.0064 | ss13829 | GO:0004872 | 0.0046 | s110752 | GO:0044249 | 0.0036 | s111921 | GO:0006725 | 0.0022 |
| ss15031 | GO:0006629 | 0.0097 | slr1940 | GO:0005216 | 0.0064 | slr5013 | GO:0004872 | 0.0046 | slr0981 | GO:0044249 | 0.0036 | s111461 | GO:0006725 | 0.0022 |
| ssr6026 | GO:0006629 | 0.0097 | s110737 | GO:0005216 | 0.0064 | ssr8013 | GO:0004872 | 0.0046 | s110376 | GO:0044267 | 0.0036 | slr0345 | GO:0006725 | 0.0022 |
| s111400 | GO:0006629 | 0.0097 | slr0169 | GO:0005216 | 0.0064 | s110335 | GO:0004872 | 0.0046 | slr1223 | GO:0006520 | 0.0036 | slr1907 | GO:0006725 | 0.0022 |
| slr6049 | GO:0006629 | 0.0097 | s110449 | GO:0005216 | 0.0064 | slr8022 | GO:0016810 | 0.0046 | s111218 | GO:0006790 | 0.0036 | slr5012 | GO:0006725 | 0.0022 |
| ss12420 | GO:0006629 | 0.0097 | slr0742 | GO:0005216 | 0.0064 | slr1659 | GO:0016853 | 0.0046 | slr0376 | GO:0006790 | 0.0036 | slr6005 | GO:0006725 | 0.0022 |

|          |            |        |          |            |        |          |            |        |          |            |        |          |            |        |
|----------|------------|--------|----------|------------|--------|----------|------------|--------|----------|------------|--------|----------|------------|--------|
| slr1768  | GO:0006629 | 0.0097 | sll1950  | GO:0005216 | 0.0064 | sll1426  | GO:0016853 | 0.0046 | sll0760  | GO:0006520 | 0.0036 | ssr6024  | GO:0006725 | 0.0022 |
| sll1960  | GO:0006629 | 0.0097 | slr0483  | GO:0005216 | 0.0064 | sll1166  | GO:0016853 | 0.0046 | sll1381  | GO:0044267 | 0.0036 | sll1486  | GO:0044238 | 0.0022 |
| slr1535  | GO:0006629 | 0.0097 | sll10685 | GO:0005216 | 0.0064 | slr1327  | GO:0016810 | 0.0046 | sll1696  | GO:0006520 | 0.0036 | sll17064 | GO:0006725 | 0.0022 |
| ssl1923  | GO:0006629 | 0.0097 | sll11352 | GO:0005216 | 0.0064 | ss18028  | GO:0004872 | 0.0046 | slr0587  | GO:0016788 | 0.0036 | slr7101  | GO:0006725 | 0.0022 |
| ssl5095  | GO:0006629 | 0.0097 | ssr2009  | GO:0005216 | 0.0064 | sll10691 | GO:0004872 | 0.0046 | ssr7035  | GO:0016788 | 0.0036 | ssr6002  | GO:0006725 | 0.0022 |
| ssl18008 | GO:0006629 | 0.0096 | slr1062  | GO:0005216 | 0.0064 | sll10615 | GO:0016853 | 0.0046 | sll1573  | GO:0016788 | 0.0036 | ssr5121  | GO:0044238 | 0.0022 |
| sll10183 | GO:0006950 | 0.0096 | slr0053  | GO:0005216 | 0.0064 | sll11717 | GO:0016810 | 0.0046 | slr1174  | GO:0016788 | 0.0036 | sll11373 | GO:0044238 | 0.0022 |
| slr0924  | GO:0006629 | 0.0096 | slr1287  | GO:0005216 | 0.0064 | ss11918  | GO:0016810 | 0.0046 | sll1495  | GO:0016788 | 0.0036 | ssr0761  | GO:0044238 | 0.0022 |
| sll10827 | GO:0006629 | 0.0096 | sll10588 | GO:0005216 | 0.0064 | slr5012  | GO:0004872 | 0.0046 | sll1698  | GO:0016788 | 0.0036 | ss11300  | GO:0044238 | 0.0022 |
| slr1415  | GO:0006629 | 0.0096 | slr1338  | GO:0005216 | 0.0064 | ss11263  | GO:0004872 | 0.0046 | ss12814  | GO:0016788 | 0.0036 | sll10994 | GO:0006725 | 0.0022 |
| slr0149  | GO:0006629 | 0.0096 | slr1128  | GO:0005216 | 0.0064 | sll11934 | GO:0016853 | 0.0046 | slr1875  | GO:0016788 | 0.0036 | sll11378 | GO:0006725 | 0.0022 |
| slr1259  | GO:0006629 | 0.0096 | sll11170 | GO:0005216 | 0.0064 | sll11652 | GO:0004872 | 0.0046 | slr5087  | GO:0016788 | 0.0036 | slr0498  | GO:0044238 | 0.0022 |
| slr1071  | GO:0006629 | 0.0096 | sll10602 | GO:0005216 | 0.0064 | ss12471  | GO:0005216 | 0.0046 | slr0689  | GO:0016788 | 0.0036 | ssr0657  | GO:0044238 | 0.0022 |
| sll10572 | GO:0006629 | 0.0096 | ssr3122  | GO:0044267 | 0.0063 | slr6103  | GO:0016810 | 0.0046 | sll10905 | GO:0016788 | 0.0036 | ss17021  | GO:0044238 | 0.0022 |
| slr1070  | GO:0006629 | 0.0096 | sll10381 | GO:0044267 | 0.0063 | sll11160 | GO:0005216 | 0.0046 | sll11106 | GO:0016788 | 0.0036 | sll10249 | GO:0044238 | 0.0022 |
| sll11021 | GO:0006629 | 0.0096 | ssr2615  | GO:0044267 | 0.0063 | sll11461 | GO:0005216 | 0.0046 | slr6051  | GO:0016788 | 0.0036 | slr1223  | GO:0006725 | 0.0022 |
| sll10639 | GO:0006629 | 0.0096 | slr0006  | GO:0044267 | 0.0063 | sll10867 | GO:0005216 | 0.0046 | sll11926 | GO:0016788 | 0.0036 | slr2038  | GO:0044262 | 0.0022 |
| slr1811  | GO:0006950 | 0.0096 | sll10023 | GO:0044267 | 0.0063 | sll10925 | GO:0016810 | 0.0046 | ss12069  | GO:0016788 | 0.0036 | slr1619  | GO:0006725 | 0.0022 |
| ssl2733  | GO:0006950 | 0.0096 | slr1210  | GO:0044267 | 0.0063 | slr1681  | GO:0016810 | 0.0046 | slr1163  | GO:0016788 | 0.0036 | slr5102  | GO:0044238 | 0.0022 |
| sll1654  | GO:0006629 | 0.0096 | sll10783 | GO:0006164 | 0.0063 | slr0545  | GO:0016853 | 0.0046 | ss13615  | GO:0016788 | 0.0036 | ssr2067  | GO:0044238 | 0.0022 |
| slr1062  | GO:0006629 | 0.0096 | ss10242  | GO:0044267 | 0.0063 | slr6006  | GO:0005216 | 0.0046 | ssr2318  | GO:0016788 | 0.0036 | sll11891 | GO:0044238 | 0.0022 |
| slr1383  | GO:0006629 | 0.0096 | sll11442 | GO:0044267 | 0.0063 | ss12138  | GO:0016810 | 0.0046 | sll15028 | GO:0016788 | 0.0036 | ss15025  | GO:0006725 | 0.0022 |
| slr1895  | GO:0006629 | 0.0096 | slr0609  | GO:0006164 | 0.0063 | sll10596 | GO:0016853 | 0.0046 | ssr6078  | GO:0016788 | 0.0036 | slr0397  | GO:0044238 | 0.0022 |
| slr2125  | GO:0006629 | 0.0096 | slr1047  | GO:0006164 | 0.0063 | ssr6062  | GO:0016810 | 0.0046 | slr7026  | GO:0016788 | 0.0036 | slr0345  | GO:0044238 | 0.0022 |
| slr0654  | GO:0006629 | 0.0096 | slr0144  | GO:0044267 | 0.0063 | slr0699  | GO:0004872 | 0.0046 | slr1101  | GO:0016788 | 0.0036 | sll11164 | GO:0006725 | 0.0022 |
| slr0909  | GO:0006950 | 0.0096 | slr0023  | GO:0044267 | 0.0063 | slr6091  | GO:0004872 | 0.0046 | ss13549  | GO:0016788 | 0.0036 | slr1923  | GO:0006725 | 0.0022 |
| sll1072  | GO:0006629 | 0.0096 | sll11563 | GO:0044267 | 0.0063 | slr7099  | GO:0016810 | 0.0046 | ssr2047  | GO:0016788 | 0.0036 | sll18019 | GO:0044238 | 0.0022 |
| sll10577 | GO:0006950 | 0.0096 | slr1885  | GO:0044267 | 0.0063 | slr1066  | GO:0016853 | 0.0046 | sll10162 | GO:0016788 | 0.0036 | sll11532 | GO:0044238 | 0.0022 |
| sll11239 | GO:0006629 | 0.0096 | slr1851  | GO:0006164 | 0.0063 | slr1537  | GO:0016810 | 0.0046 | sll10696 | GO:0016788 | 0.0036 | slr0613  | GO:0044238 | 0.0022 |
| slr1767  | GO:0006950 | 0.0096 | slr1573  | GO:0044267 | 0.0063 | slr1114  | GO:0004872 | 0.0046 | sll17050 | GO:0016788 | 0.0036 | slr1163  | GO:0044238 | 0.0022 |
| slr0172  | GO:0006629 | 0.0096 | sll10325 | GO:0044267 | 0.0063 | ss12781  | GO:0005216 | 0.0046 | slr7099  | GO:0016788 | 0.0036 | slr7095  | GO:0006725 | 0.0022 |
| sll10225 | GO:0006629 | 0.0096 | slr1084  | GO:0044267 | 0.0063 | slr0769  | GO:0005216 | 0.0046 | ssr6024  | GO:0016788 | 0.0036 | slr5012  | GO:0044238 | 0.0022 |
| sll10843 | GO:0006629 | 0.0096 | sll10191 | GO:0044267 | 0.0063 | ssr1473  | GO:0004872 | 0.0046 | slr0184  | GO:0016788 | 0.0036 | ss12814  | GO:0006725 | 0.0022 |
| sll11241 | GO:0006629 | 0.0096 | slr1932  | GO:0044267 | 0.0063 | sll10762 | GO:0005216 | 0.0046 | sll11570 | GO:0016788 | 0.0036 | ssr5011  | GO:0044238 | 0.0022 |
| sll11040 | GO:0006629 | 0.0096 | slr0039  | GO:0008324 | 0.0063 | ssr1558  | GO:0016810 | 0.0046 | slr1406  | GO:0016788 | 0.0036 | ssr2972  | GO:0006725 | 0.0022 |
| sll10590 | GO:0006629 | 0.0096 | ssr5121  | GO:0008324 | 0.0063 | ss17007  | GO:0004872 | 0.0046 | sll11380 | GO:0016788 | 0.0036 | slr0730  | GO:0044238 | 0.0022 |
| slr0111  | GO:0006629 | 0.0096 | ssr2802  | GO:0008324 | 0.0063 | slr0334  | GO:0004872 | 0.0046 | slr1624  | GO:0016788 | 0.0036 | sll11160 | GO:0006725 | 0.0022 |
| slr1258  | GO:0006629 | 0.0096 | sll11882 | GO:0008324 | 0.0063 | sll17077 | GO:0004872 | 0.0046 | sll17067 | GO:0016788 | 0.0036 | slr6087  | GO:0006725 | 0.0022 |
| sll11659 | GO:0006629 | 0.0096 | sll10298 | GO:0008324 | 0.0063 | slr1957  | GO:0005216 | 0.0046 | ss10467  | GO:0016788 | 0.0036 | sll11476 | GO:0044238 | 0.0022 |
| slr0789  | GO:0006629 | 0.0096 | ssr1768  | GO:0008324 | 0.0063 | sll11188 | GO:0004872 | 0.0046 | ssr6089  | GO:0016788 | 0.0036 | slr0728  | GO:0006725 | 0.0022 |
| slr1033  | GO:0006629 | 0.0096 | sll10098 | GO:0008324 | 0.0063 | slr0816  | GO:0004872 | 0.0046 | sll15128 | GO:0016788 | 0.0036 | slr1927  | GO:0006725 | 0.0022 |
| sll10995 | GO:0006629 | 0.0096 | sll17033 | GO:0008324 | 0.0063 | sll11702 | GO:0016810 | 0.0046 | sll10563 | GO:0016788 | 0.0036 | slr1753  | GO:0006725 | 0.0022 |
| slr0455  | GO:0006629 | 0.0096 | ss12064  | GO:0008324 | 0.0063 | ss11046  | GO:0004872 | 0.0046 | slr5013  | GO:0016788 | 0.0036 | ssr5074  | GO:0006725 | 0.0022 |
| slr1926  | GO:0006950 | 0.0096 | ssr6019  | GO:0008324 | 0.0063 | sll11396 | GO:0005216 | 0.0046 | ss18028  | GO:0016788 | 0.0036 | slr0590  | GO:0044238 | 0.0022 |
| sll11071 | GO:0006629 | 0.0096 | slr0326  | GO:0008324 | 0.0063 | ssr0536  | GO:0016853 | 0.0046 | ss15008  | GO:0016788 | 0.0036 | slr0651  | GO:0006725 | 0.0022 |
| sll12007 | GO:0006259 | 0.0094 | ss11918  | GO:0008324 | 0.0063 | slr0637  | GO:0004872 | 0.0046 | slr0888  | GO:0016788 | 0.0036 | slr6031  | GO:0006725 | 0.0022 |
| slr0914  | GO:0008233 | 0.0094 | ssr5074  | GO:0008324 | 0.0063 | sll17070 | GO:0016810 | 0.0046 | slr2049  | GO:0016788 | 0.0036 | slr0980  | GO:0044262 | 0.0022 |
| sll10394 | GO:0008233 | 0.0094 | slr0453  | GO:0008324 | 0.0063 | slr0575  | GO:0016810 | 0.0046 | sll11254 | GO:0016788 | 0.0036 | sll11254 | GO:0006725 | 0.0022 |
| slr0607  | GO:0008324 | 0.0094 | ssr7079  | GO:0008324 | 0.0063 | sll12015 | GO:0005216 | 0.0046 | sll11164 | GO:0016788 | 0.0036 | sll11570 | GO:0006725 | 0.0022 |
| sll10905 | GO:0008233 | 0.0094 | sll11532 | GO:0008324 | 0.0063 | sll17006 | GO:0004872 | 0.0046 | slr0728  | GO:0016788 | 0.0036 | ssr2060  | GO:0006725 | 0.0022 |
| slr6081  | GO:0008233 | 0.0094 | ss15015  | GO:0008324 | 0.0063 | sll10047 | GO:0016810 | 0.0046 | slr0948  | GO:0016788 | 0.0036 | sll10565 | GO:0006725 | 0.0022 |
| slr6029  | GO:0008233 | 0.0094 | slr7100  | GO:0008324 | 0.0063 | slr0184  | GO:0004872 | 0.0046 | sll17087 | GO:0016788 | 0.0036 | slr1628  | GO:0006725 | 0.0022 |
| sll15067 | GO:0008233 | 0.0094 | sll11381 | GO:0008324 | 0.0063 | ssr1041  | GO:0004872 | 0.0046 | sll11192 | GO:0016788 | 0.0036 | ssr6003  | GO:0006725 | 0.0022 |
| slr1174  | GO:0008233 | 0.0094 | slr6044  | GO:0008324 | 0.0063 | slr0509  | GO:0004872 | 0.0046 | slr5053  | GO:0016788 | 0.0036 | slr7059  | GO:0006725 | 0.0022 |



|         |            |        |         |            |        |         |            |        |         |            |        |         |            |        |
|---------|------------|--------|---------|------------|--------|---------|------------|--------|---------|------------|--------|---------|------------|--------|
| slr0479 | GO:0008324 | 0.0094 | sl17069 | GO:0008324 | 0.0063 | slr1162 | GO:0005216 | 0.0046 | sl18027 | GO:0016788 | 0.0036 | ss11263 | GO:0006725 | 0.0022 |
| ss12733 | GO:0008324 | 0.0094 | sl11911 | GO:0008324 | 0.0063 | sl11509 | GO:0005216 | 0.0046 | sl10327 | GO:0016788 | 0.0036 | ssr3129 | GO:0044238 | 0.0022 |
| slr0498 | GO:0008233 | 0.0094 | slr0291 | GO:0008324 | 0.0063 | sl10659 | GO:0005216 | 0.0046 | slr6029 | GO:0016788 | 0.0036 | sl17030 | GO:0044238 | 0.0022 |
| sl10442 | GO:0008233 | 0.0094 | slr6103 | GO:0008324 | 0.0063 | sl10802 | GO:0005216 | 0.0046 | slr1752 | GO:0016788 | 0.0036 | sl11609 | GO:0044238 | 0.0022 |
| sl10670 | GO:0008233 | 0.0094 | ss11263 | GO:0008324 | 0.0063 | slr0689 | GO:0004872 | 0.0046 | ss12384 | GO:0016788 | 0.0036 | sl15047 | GO:0006725 | 0.0022 |
| ssr0336 | GO:0008233 | 0.0094 | ss17022 | GO:0008324 | 0.0063 | slr0888 | GO:0004872 | 0.0046 | slr0708 | GO:0016788 | 0.0036 | sl11068 | GO:0006725 | 0.0022 |
| sl10372 | GO:0008233 | 0.0094 | ssr8013 | GO:0008324 | 0.0063 | sl10031 | GO:0016810 | 0.0046 | sl10525 | GO:0016788 | 0.0036 | slr6029 | GO:0044238 | 0.0022 |
| ssr7084 | GO:0008233 | 0.0094 | slr1628 | GO:0008324 | 0.0063 | slr0238 | GO:0004872 | 0.0046 | slr0516 | GO:0016788 | 0.0036 | slr7060 | GO:0044238 | 0.0022 |
| sl18035 | GO:0008233 | 0.0094 | sl15067 | GO:0008324 | 0.0063 | slr1442 | GO:0004872 | 0.0046 | ss18039 | GO:0016788 | 0.0036 | sl10394 | GO:0044238 | 0.0022 |
| sl10230 | GO:0008233 | 0.0094 | sl11912 | GO:0016810 | 0.0063 | sl10062 | GO:0004872 | 0.0046 | sl11052 | GO:0016788 | 0.0036 | slr6088 | GO:0006725 | 0.0022 |
| sl18040 | GO:0008233 | 0.0094 | ssr0657 | GO:0008324 | 0.0063 | sl11163 | GO:0005216 | 0.0046 | ss17022 | GO:0016788 | 0.0036 | ss10312 | GO:0006725 | 0.0022 |
| ssr7079 | GO:0008233 | 0.0094 | sl10606 | GO:0016810 | 0.0063 | slr0300 | GO:0004872 | 0.0046 | ssr7084 | GO:0016788 | 0.0036 | slr1970 | GO:0006725 | 0.0022 |
| ss15114 | GO:0008233 | 0.0094 | slr6028 | GO:0008324 | 0.0063 | ss17038 | GO:0004872 | 0.0046 | sl10765 | GO:0016788 | 0.0036 | sl11681 | GO:0006725 | 0.0022 |
| ssr0657 | GO:0008233 | 0.0094 | ssr6024 | GO:0008324 | 0.0063 | slr0709 | GO:0004872 | 0.0046 | sl11319 | GO:0016788 | 0.0036 | slr0587 | GO:0006725 | 0.0022 |
| sl11915 | GO:0008233 | 0.0094 | slr0656 | GO:0008324 | 0.0063 | sl15132 | GO:0004872 | 0.0046 | slr0656 | GO:0016788 | 0.0036 | sl17078 | GO:0006725 | 0.0022 |
| slr0334 | GO:0008233 | 0.0094 | sl11898 | GO:0008324 | 0.0063 | sl10031 | GO:0004872 | 0.0046 | sl12011 | GO:0016788 | 0.0036 | ssr2333 | GO:0006725 | 0.0022 |
| slr0587 | GO:0008233 | 0.0094 | sl16055 | GO:0008324 | 0.0063 | sl16055 | GO:0004872 | 0.0046 | slr6009 | GO:0016788 | 0.0036 | slr5126 | GO:0006725 | 0.0022 |
| slr0106 | GO:0008233 | 0.0094 | sl11188 | GO:0008324 | 0.0063 | sl10939 | GO:0004872 | 0.0046 | slr2052 | GO:0016788 | 0.0036 | slr1406 | GO:0044238 | 0.0022 |
| slr2071 | GO:0008233 | 0.0094 | sl11142 | GO:0008324 | 0.0063 | slr2032 | GO:0005216 | 0.0046 | slr1173 | GO:0016788 | 0.0036 | slr2000 | GO:0044238 | 0.0022 |
| slr0978 | GO:0008324 | 0.0094 | slr1624 | GO:0008324 | 0.0063 | slr0039 | GO:0004872 | 0.0046 | sl11532 | GO:0016788 | 0.0036 | slr1474 | GO:0044238 | 0.0022 |
| sl18001 | GO:0008233 | 0.0094 | sl11095 | GO:0008324 | 0.0063 | sl10496 | GO:0004872 | 0.0046 | slr0270 | GO:0016788 | 0.0036 | sl11902 | GO:0044262 | 0.0022 |
| slr1079 | GO:0008233 | 0.0094 | sl10625 | GO:0008324 | 0.0063 | slr7060 | GO:0004872 | 0.0046 | sl11381 | GO:0016788 | 0.0036 | slr0771 | GO:0006725 | 0.0022 |
| sl11024 | GO:0008233 | 0.0094 | slr7057 | GO:0008324 | 0.0063 | sl11060 | GO:0016853 | 0.0046 | ss15015 | GO:0016788 | 0.0036 | slr2118 | GO:0006725 | 0.0022 |
| slr0181 | GO:0008233 | 0.0094 | ss15114 | GO:0008324 | 0.0063 | sl10863 | GO:0005216 | 0.0046 | ssr0336 | GO:0016788 | 0.0036 | sl11307 | GO:0044238 | 0.0022 |
| slr1173 | GO:0008233 | 0.0094 | sl10269 | GO:0016810 | 0.0063 | slr1599 | GO:0016810 | 0.0046 | slr5112 | GO:0016788 | 0.0036 | slr1624 | GO:0044238 | 0.0022 |
| slr1628 | GO:0008233 | 0.0094 | sl10765 | GO:0008324 | 0.0063 | sl15047 | GO:0005216 | 0.0046 | slr2027 | GO:0016788 | 0.0036 | slr0575 | GO:0006725 | 0.0022 |
| ss10788 | GO:0008233 | 0.0094 | slr0208 | GO:0016810 | 0.0063 | ss16061 | GO:0016810 | 0.0046 | sl11191 | GO:0016788 | 0.0036 | slr1863 | GO:0006725 | 0.0022 |
| slr0345 | GO:0008233 | 0.0094 | sl18027 | GO:0008324 | 0.0063 | slr1576 | GO:0005216 | 0.0046 | sl11784 | GO:0016788 | 0.0036 | slr1601 | GO:0006725 | 0.0022 |
| ssr8047 | GO:0008233 | 0.0094 | slr5111 | GO:0008324 | 0.0063 | slr0709 | GO:0016810 | 0.0046 | slr6106 | GO:0016788 | 0.0036 | ss15015 | GO:0006725 | 0.0022 |
| slr0709 | GO:0008233 | 0.0094 | sl11464 | GO:0008324 | 0.0063 | slr0271 | GO:0016810 | 0.0046 | slr0039 | GO:0016788 | 0.0036 | ss15113 | GO:0044238 | 0.0022 |
| sl10044 | GO:0008233 | 0.0094 | ssr6030 | GO:0008324 | 0.0063 | ssr5011 | GO:0004872 | 0.0046 | ssr6099 | GO:0016788 | 0.0036 | ssr1473 | GO:0044238 | 0.0022 |
| slr0273 | GO:0008233 | 0.0094 | sl11832 | GO:0008324 | 0.0063 | slr6081 | GO:0004872 | 0.0046 | sl11692 | GO:0016788 | 0.0036 | sl17090 | GO:0044238 | 0.0022 |
| ssr2802 | GO:0008233 | 0.0094 | slr0699 | GO:0008324 | 0.0063 | ss15108 | GO:0016810 | 0.0046 | ss15025 | GO:0016788 | 0.0036 | slr1990 | GO:0006725 | 0.0022 |
| ssr6002 | GO:0008233 | 0.0094 | ssr3572 | GO:0008324 | 0.0063 | slr0667 | GO:0016810 | 0.0046 | sl10157 | GO:0016788 | 0.0036 | slr0725 | GO:0044238 | 0.0022 |
| sl11089 | GO:0008233 | 0.0094 | slr0667 | GO:0008324 | 0.0063 | sl10394 | GO:0004872 | 0.0046 | slr6081 | GO:0016788 | 0.0036 | ss12245 | GO:0006725 | 0.0022 |
| slr1087 | GO:0008233 | 0.0094 | ssr0761 | GO:0008324 | 0.0063 | sl11447 | GO:0005216 | 0.0046 | slr0582 | GO:0016788 | 0.0036 | ss15096 | GO:0006725 | 0.0022 |
| slr0109 | GO:0008233 | 0.0094 | slr0980 | GO:0016810 | 0.0063 | slr0376 | GO:0016853 | 0.0046 | slr0269 | GO:0016788 | 0.0036 | ss15100 | GO:0006725 | 0.0022 |
| ss12064 | GO:0008233 | 0.0094 | slr7102 | GO:0008324 | 0.0063 | slr0670 | GO:0016810 | 0.0046 | slr0885 | GO:0016788 | 0.0036 | slr0517 | GO:0044238 | 0.0022 |
| ss16092 | GO:0008233 | 0.0094 | slr2049 | GO:0008324 | 0.0063 | ss13379 | GO:0005216 | 0.0046 | ssr5092 | GO:0016788 | 0.0036 | ss17048 | GO:0044238 | 0.0022 |
| ssr1391 | GO:0008324 | 0.0094 | ssr7017 | GO:0008324 | 0.0063 | ss11498 | GO:0005216 | 0.0046 | sl17033 | GO:0016788 | 0.0036 | slr8021 | GO:0044238 | 0.0022 |
| slr7057 | GO:0008233 | 0.0094 | sl11024 | GO:0008324 | 0.0063 | sl11853 | GO:0005216 | 0.0046 | sl10335 | GO:0016788 | 0.0036 | ssr7035 | GO:0044238 | 0.0022 |
| slr7102 | GO:0008233 | 0.0094 | ss11300 | GO:0008324 | 0.0063 | slr6075 | GO:0004872 | 0.0046 | sl16052 | GO:0016788 | 0.0036 | slr1215 | GO:0016874 | 0.0022 |
| slr6075 | GO:0008233 | 0.0094 | sl17028 | GO:0008324 | 0.0063 | sl10360 | GO:0016853 | 0.0046 | ssr7079 | GO:0016788 | 0.0036 | slr7100 | GO:0005976 | 0.0021 |
| ssr7093 | GO:0008233 | 0.0094 | ss15100 | GO:0008324 | 0.0063 | slr0625 | GO:0004872 | 0.0046 | sl10442 | GO:0016788 | 0.0036 | sl17070 | GO:0006730 | 0.0021 |
| slr0780 | GO:0008233 | 0.0094 | slr0865 | GO:0008324 | 0.0063 | sl11130 | GO:0005216 | 0.0046 | slr0271 | GO:0016788 | 0.0036 | sl10162 | GO:0006730 | 0.0021 |
| slr0923 | GO:0008324 | 0.0094 | ss11552 | GO:0008324 | 0.0063 | slr1752 | GO:0004872 | 0.0046 | sl11158 | GO:0016788 | 0.0036 | ssr3129 | GO:0006730 | 0.0021 |
| sl11979 | GO:0008233 | 0.0094 | slr2117 | GO:0008324 | 0.0063 | sl17086 | GO:0004872 | 0.0046 | ss12138 | GO:0016788 | 0.0036 | sl11068 | GO:0006730 | 0.0021 |
| ss10467 | GO:0008233 | 0.0094 | slr1911 | GO:0008324 | 0.0063 | sl18027 | GO:0004872 | 0.0046 | ss15113 | GO:0016788 | 0.0036 | slr6028 | GO:0005976 | 0.0021 |
| ssr3570 | GO:0008233 | 0.0094 | slr0637 | GO:0008324 | 0.0063 | sl18035 | GO:0004872 | 0.0046 | ssr6027 | GO:0016788 | 0.0036 | sl15067 | GO:0005976 | 0.0021 |
| ss13573 | GO:0008233 | 0.0094 | slr1327 | GO:0008324 | 0.0063 | ssr1768 | GO:0016810 | 0.0046 | ssr0657 | GO:0016788 | 0.0036 | slr1970 | GO:0005976 | 0.0021 |
| slr0967 | GO:0008233 | 0.0094 | sl15132 | GO:0008324 | 0.0063 | slr1206 | GO:0016810 | 0.0046 | ssr3570 | GO:0016788 | 0.0036 | slr1704 | GO:0005976 | 0.0021 |
| ssr2060 | GO:0008233 | 0.0094 | sl11388 | GO:0008324 | 0.0063 | ssr6026 | GO:0005216 | 0.0046 | slr7060 | GO:0016788 | 0.0036 | slr6091 | GO:0006730 | 0.0021 |
| ss11552 | GO:0008233 | 0.0094 | sl11698 | GO:0008324 | 0.0063 | sl17050 | GO:0004872 | 0.0046 | slr0325 | GO:0016788 | 0.0036 | slr8021 | GO:0006730 | 0.0021 |
| slr0699 | GO:0008233 | 0.0094 | slr1079 | GO:0008324 | 0.0063 | slr1814 | GO:0005216 | 0.0046 | sl11036 | GO:0016788 | 0.0036 | slr0780 | GO:0006730 | 0.0021 |

|         |            |        |         |            |        |         |            |        |         |            |        |         |            |        |
|---------|------------|--------|---------|------------|--------|---------|------------|--------|---------|------------|--------|---------|------------|--------|
| s111049 | GO:0008233 | 0.0094 | ssl3829 | GO:0008324 | 0.0063 | ssr6062 | GO:0004872 | 0.0046 | slr6087 | GO:0016788 | 0.0036 | slr0728 | GO:0005976 | 0.0021 |
| slr1163 | GO:0008233 | 0.0094 | slr0755 | GO:0008324 | 0.0063 | slr1464 | GO:0005216 | 0.0046 | slr8021 | GO:0016788 | 0.0036 | s111388 | GO:0005976 | 0.0021 |
| s115030 | GO:0008233 | 0.0094 | slr1886 | GO:0008324 | 0.0063 | slr6022 | GO:0004872 | 0.0046 | ssr6062 | GO:0016788 | 0.0036 | s117050 | GO:0005976 | 0.0021 |
| slr1623 | GO:0008233 | 0.0094 | ssr3570 | GO:0008324 | 0.0063 | slr0092 | GO:0005216 | 0.0046 | s111726 | GO:0016788 | 0.0036 | ss10350 | GO:0005976 | 0.0021 |
| slr0634 | GO:0008233 | 0.0094 | slr0270 | GO:0008324 | 0.0063 | ssr6099 | GO:0004872 | 0.0046 | slr0755 | GO:0016788 | 0.0036 | ss12064 | GO:0006730 | 0.0021 |
| slr0184 | GO:0008233 | 0.0094 | ssl7007 | GO:0008324 | 0.0063 | ssr0102 | GO:0005216 | 0.0046 | ss17042 | GO:0016788 | 0.0036 | s111106 | GO:0005976 | 0.0021 |
| s111562 | GO:0008324 | 0.0094 | slr6029 | GO:0008324 | 0.0063 | slr0637 | GO:0016810 | 0.0046 | s115063 | GO:0016788 | 0.0036 | slr1570 | GO:0005976 | 0.0021 |
| s117050 | GO:0008233 | 0.0094 | slr2060 | GO:0008324 | 0.0063 | slr1087 | GO:0004872 | 0.0046 | slr1951 | GO:0016788 | 0.0036 | s110172 | GO:0006730 | 0.0021 |
| s110625 | GO:0008233 | 0.0094 | slr1442 | GO:0008324 | 0.0063 | s110249 | GO:0016810 | 0.0046 | slr0914 | GO:0016788 | 0.0036 | s110847 | GO:0006730 | 0.0021 |
| s111717 | GO:0008233 | 0.0094 | slr1789 | GO:0008324 | 0.0063 | s110984 | GO:0016810 | 0.0046 | s117077 | GO:0016788 | 0.0036 | slr0914 | GO:0005976 | 0.0021 |
| s110577 | GO:0008324 | 0.0094 | s110563 | GO:0008324 | 0.0063 | slr1276 | GO:0005216 | 0.0046 | ss11690 | GO:0016788 | 0.0036 | slr6033 | GO:0006730 | 0.0021 |
| s117028 | GO:0008233 | 0.0094 | slr2003 | GO:0008324 | 0.0063 | slr0082 | GO:0004872 | 0.0046 | slr0590 | GO:0016788 | 0.0036 | ss15025 | GO:0006730 | 0.0021 |
| slr1737 | GO:0008233 | 0.0094 | slr2027 | GO:0008324 | 0.0063 | s111583 | GO:0004872 | 0.0046 | slr1623 | GO:0016788 | 0.0036 | slr0326 | GO:0006730 | 0.0021 |
| s110925 | GO:0008233 | 0.0094 | slr0725 | GO:0008324 | 0.0063 | slr0498 | GO:0004872 | 0.0046 | s118007 | GO:0044249 | 0.0035 | slr0667 | GO:0006730 | 0.0021 |
| ssr5106 | GO:0008233 | 0.0094 | s111926 | GO:0008324 | 0.0063 | ssr3129 | GO:0016810 | 0.0046 | slr0505 | GO:0044249 | 0.0035 | slr1110 | GO:0030001 | 0.0021 |
| s111832 | GO:0008233 | 0.0094 | ssr1473 | GO:0008324 | 0.0063 | slr0613 | GO:0016810 | 0.0046 | s111960 | GO:0044249 | 0.0035 | s111681 | GO:0005976 | 0.0021 |
| s110565 | GO:0008233 | 0.0094 | slr0976 | GO:0008324 | 0.0063 | s110847 | GO:0004872 | 0.0046 | slr0287 | GO:0044249 | 0.0035 | slr5053 | GO:0005976 | 0.0021 |
| ssr6083 | GO:0008233 | 0.0094 | s110543 | GO:0008324 | 0.0063 | s115046 | GO:0005216 | 0.0046 | s110913 | GO:0044249 | 0.0035 | s111380 | GO:0005976 | 0.0021 |
| slr1406 | GO:0008233 | 0.0094 | slr1944 | GO:0008324 | 0.0063 | ssr0109 | GO:0004872 | 0.0046 | s110867 | GO:0044249 | 0.0035 | slr0637 | GO:0005976 | 0.0021 |
| slr1886 | GO:0008233 | 0.0094 | ssl3615 | GO:0008324 | 0.0063 | s117089 | GO:0004872 | 0.0046 | slr1196 | GO:0044249 | 0.0035 | slr0810 | GO:0044262 | 0.0021 |
| s111834 | GO:0008233 | 0.0094 | ssr8047 | GO:0008324 | 0.0063 | ss12069 | GO:0004872 | 0.0046 | slr0304 | GO:0044249 | 0.0035 | slr0516 | GO:0006730 | 0.0021 |
| slr6044 | GO:0008233 | 0.0094 | slr7073 | GO:0008324 | 0.0063 | s118019 | GO:0016810 | 0.0046 | slr1362 | GO:0044249 | 0.0035 | s115028 | GO:0006730 | 0.0021 |
| s110069 | GO:0008233 | 0.0094 | s115030 | GO:0008324 | 0.0063 | slr0728 | GO:0016810 | 0.0046 | slr1441 | GO:0044249 | 0.0035 | slr1875 | GO:0006730 | 0.0021 |
| slr0082 | GO:0008233 | 0.0094 | ssr6086 | GO:0008324 | 0.0063 | slr0582 | GO:0004872 | 0.0046 | s110656 | GO:0007154 | 0.0035 | ssr1425 | GO:0006730 | 0.0021 |
| s111882 | GO:0008233 | 0.0094 | s117031 | GO:0008324 | 0.0063 | slr0345 | GO:0004872 | 0.0046 | slr6008 | GO:0044249 | 0.0035 | slr1241 | GO:0005976 | 0.0021 |
| slr1790 | GO:0008233 | 0.0094 | ssl1378 | GO:0008324 | 0.0063 | s110793 | GO:0016810 | 0.0046 | ssr2317 | GO:0044249 | 0.0035 | s110788 | GO:0016070 | 0.0021 |
| s110558 | GO:0008324 | 0.0094 | slr0300 | GO:0008324 | 0.0063 | s115034 | GO:0005216 | 0.0046 | s110413 | GO:0006807 | 0.0035 | s110552 | GO:0005976 | 0.0021 |
| ss16035 | GO:0008233 | 0.0094 | slr1790 | GO:0008324 | 0.0063 | slr8044 | GO:0016810 | 0.0046 | slr0092 | GO:0044249 | 0.0035 | slr0208 | GO:0030001 | 0.0021 |
| s116052 | GO:0008233 | 0.0094 | ssl2595 | GO:0008324 | 0.0063 | slr1557 | GO:0016853 | 0.0046 | slr0147 | GO:0007154 | 0.0035 | s110732 | GO:0016070 | 0.0021 |
| slr2000 | GO:0008233 | 0.0094 | s111940 | GO:0008324 | 0.0063 | slr0355 | GO:0005216 | 0.0046 | slr0503 | GO:0044249 | 0.0035 | ss16035 | GO:0006730 | 0.0021 |
| s111289 | GO:0008233 | 0.0094 | s118040 | GO:0008324 | 0.0063 | s110513 | GO:0016853 | 0.0046 | s110274 | GO:0044249 | 0.0035 | ss18039 | GO:0006730 | 0.0021 |
| slr0241 | GO:0008233 | 0.0094 | s110736 | GO:0008324 | 0.0063 | s111381 | GO:0004872 | 0.0046 | ssr5020 | GO:0044249 | 0.0035 | slr6068 | GO:0005976 | 0.0021 |
| slr1396 | GO:0008233 | 0.0094 | s111891 | GO:0008324 | 0.0063 | ss12162 | GO:0004872 | 0.0046 | slr5118 | GO:0044249 | 0.0035 | slr1173 | GO:0006730 | 0.0021 |
| slr0863 | GO:0008233 | 0.0094 | s111717 | GO:0008324 | 0.0063 | ssr5092 | GO:0004872 | 0.0046 | s111638 | GO:0044249 | 0.0035 | ss17038 | GO:0005976 | 0.0021 |
| s110788 | GO:0008324 | 0.0094 | ssl2814 | GO:0008324 | 0.0063 | slr0964 | GO:0005216 | 0.0046 | slr0619 | GO:0044249 | 0.0035 | s111737 | GO:0044262 | 0.0021 |
| slr0459 | GO:0008233 | 0.0094 | slr6016 | GO:0008324 | 0.0063 | s111380 | GO:0016810 | 0.0046 | ss15095 | GO:0044249 | 0.0035 | slr0317 | GO:0030001 | 0.0021 |
| slr2027 | GO:0008233 | 0.0094 | slr8044 | GO:0008324 | 0.0063 | ssr6046 | GO:0005216 | 0.0046 | s111222 | GO:0007154 | 0.0035 | ss13829 | GO:0005976 | 0.0021 |
| slr1851 | GO:0008324 | 0.0094 | slr0262 | GO:0006164 | 0.0062 | s110508 | GO:0016853 | 0.0046 | slr0552 | GO:0044249 | 0.0035 | slr7102 | GO:0006730 | 0.0021 |
| slr0728 | GO:0008233 | 0.0094 | ssr1951 | GO:0006164 | 0.0062 | slr0217 | GO:0004872 | 0.0046 | slr0407 | GO:0044249 | 0.0035 | ssr2711 | GO:0006730 | 0.0021 |
| ssr1473 | GO:0008233 | 0.0094 | s111853 | GO:0006164 | 0.0062 | s110321 | GO:0016810 | 0.0046 | s110293 | GO:0044249 | 0.0035 | slr0416 | GO:0006730 | 0.0021 |
| s111898 | GO:0008233 | 0.0094 | s111272 | GO:0006950 | 0.0062 | ssr7093 | GO:0004872 | 0.0046 | s110263 | GO:0044249 | 0.0035 | s111858 | GO:0044262 | 0.0021 |
| slr0263 | GO:0008324 | 0.0094 | s110487 | GO:0006164 | 0.0062 | s110625 | GO:0004872 | 0.0046 | slr1178 | GO:0044249 | 0.0035 | slr6081 | GO:0005976 | 0.0021 |
| s110192 | GO:0008324 | 0.0094 | slr1363 | GO:0006164 | 0.0062 | ssr0336 | GO:0004872 | 0.0046 | slr6006 | GO:0044249 | 0.0035 | slr2052 | GO:0005976 | 0.0021 |
| s111164 | GO:0008233 | 0.0094 | slr0059 | GO:0006164 | 0.0062 | s118002 | GO:0005216 | 0.0046 | ssr7072 | GO:0044249 | 0.0035 | slr0813 | GO:0005976 | 0.0021 |
| s110172 | GO:0008233 | 0.0094 | slr1340 | GO:0006164 | 0.0062 | s110473 | GO:0005216 | 0.0046 | s111469 | GO:0044249 | 0.0035 | slr5013 | GO:0006730 | 0.0021 |
| slr1236 | GO:0008233 | 0.0094 | slr0784 | GO:0006164 | 0.0062 | ss15068 | GO:0004872 | 0.0046 | s110609 | GO:0044249 | 0.0035 | ss17007 | GO:0006730 | 0.0021 |
| slr1704 | GO:0008233 | 0.0094 | s111765 | GO:0006164 | 0.0062 | slr0013 | GO:0004872 | 0.0046 | slr0912 | GO:0044249 | 0.0035 | s111381 | GO:0005976 | 0.0021 |
| s111319 | GO:0008233 | 0.0094 | s110710 | GO:0006164 | 0.0062 | s110354 | GO:0016853 | 0.0046 | s110354 | GO:0044249 | 0.0035 | ssr6086 | GO:0006730 | 0.0021 |
| ss11046 | GO:0008233 | 0.0094 | slr0821 | GO:0006164 | 0.0062 | slr1570 | GO:0004872 | 0.0046 | slr0821 | GO:0044249 | 0.0035 | ss12138 | GO:0006730 | 0.0021 |
| slr0651 | GO:0008233 | 0.0094 | s111722 | GO:0006164 | 0.0062 | slr6045 | GO:0004872 | 0.0046 | s111715 | GO:0044249 | 0.0035 | ss12162 | GO:0006730 | 0.0021 |
| s111891 | GO:0008233 | 0.0094 | slr5119 | GO:0006164 | 0.0062 | ss17021 | GO:0016810 | 0.0046 | s111866 | GO:0044249 | 0.0035 | slr1875 | GO:0005976 | 0.0021 |
| slr2103 | GO:0008233 | 0.0094 | slr6073 | GO:0006164 | 0.0062 | slr1914 | GO:0005216 | 0.0046 | s111862 | GO:0044249 | 0.0035 | ss15114 | GO:0005976 | 0.0021 |
| slr0909 | GO:0008324 | 0.0094 | slr0569 | GO:0006164 | 0.0062 | ss15129 | GO:0005216 | 0.0046 | slr1464 | GO:0044249 | 0.0035 | s111785 | GO:0005976 | 0.0021 |
| slr2052 | GO:0008233 | 0.0094 | ssl1520 | GO:0006164 | 0.0062 | slr6074 | GO:0005216 | 0.0046 | slr5023 | GO:0044249 | 0.0035 | ss12971 | GO:0006730 | 0.0021 |

|          |            |        |          |            |        |          |            |        |          |            |        |          |            |        |
|----------|------------|--------|----------|------------|--------|----------|------------|--------|----------|------------|--------|----------|------------|--------|
| ssl2971  | GO:0008233 | 0.0094 | slr0380  | GO:0006164 | 0.0062 | ssr2318  | GO:0004872 | 0.0046 | slr0581  | GO:0044249 | 0.0035 | ssr6089  | GO:0005976 | 0.0021 |
| ssl3829  | GO:0008233 | 0.0094 | sll1866  | GO:0006164 | 0.0062 | sll2013  | GO:0005216 | 0.0046 | slr0380  | GO:0044249 | 0.0035 | slr6012  | GO:0005976 | 0.0021 |
| slr1056  | GO:0008233 | 0.0094 | slr1179  | GO:0006164 | 0.0062 | ssr2802  | GO:0016810 | 0.0046 | slr6014  | GO:0044249 | 0.0035 | ssr1155  | GO:0005976 | 0.0021 |
| sll10160 | GO:0008233 | 0.0094 | slr7014  | GO:0006164 | 0.0062 | ss16035  | GO:0004872 | 0.0046 | ssr2912  | GO:0044249 | 0.0035 | slr1507  | GO:0005976 | 0.0021 |
| sll11751 | GO:0016788 | 0.0093 | slr6008  | GO:0006164 | 0.0062 | sll10098 | GO:0016810 | 0.0046 | slr0333  | GO:0044249 | 0.0035 | sll17033 | GO:0005976 | 0.0021 |
| slr0609  | GO:0016788 | 0.0093 | sll1552  | GO:0006164 | 0.0062 | ssr6003  | GO:0044262 | 0.0045 | ssr3189  | GO:0044249 | 0.0035 | slr1911  | GO:0005976 | 0.0021 |
| sll10577 | GO:0016788 | 0.0093 | sll10762 | GO:0006164 | 0.0062 | slr7097  | GO:0044262 | 0.0045 | sll10443 | GO:0044249 | 0.0035 | sll11698 | GO:0006730 | 0.0021 |
| sll10788 | GO:0016788 | 0.0093 | sgl0001  | GO:0006164 | 0.0062 | sll10703 | GO:0030001 | 0.0045 | sll10658 | GO:0044249 | 0.0035 | slr0397  | GO:0006730 | 0.0021 |
| sll10783 | GO:0016788 | 0.0093 | slr6047  | GO:0006164 | 0.0062 | sll10930 | GO:0044262 | 0.0045 | slr6065  | GO:0044249 | 0.0035 | slr7102  | GO:0005976 | 0.0021 |
| sll10732 | GO:0016788 | 0.0093 | slr1095  | GO:0006164 | 0.0062 | sll2013  | GO:0044262 | 0.0045 | ss12420  | GO:0044249 | 0.0035 | slr1807  | GO:0005976 | 0.0021 |
| slr0923  | GO:0016788 | 0.0093 | sll18007 | GO:0006164 | 0.0062 | sll10860 | GO:0044262 | 0.0045 | slr0211  | GO:0044249 | 0.0035 | slr6009  | GO:0006730 | 0.0021 |
| slr1143  | GO:0016788 | 0.0093 | ss13379  | GO:0006164 | 0.0062 | slr1306  | GO:0044262 | 0.0045 | ss13142  | GO:0044249 | 0.0035 | sll10905 | GO:0006730 | 0.0021 |
| ssr6024  | GO:0006807 | 0.0092 | slr1546  | GO:0006164 | 0.0062 | slr1081  | GO:0030001 | 0.0045 | slr1568  | GO:0044249 | 0.0035 | sll11891 | GO:0006730 | 0.0021 |
| sll10479 | GO:0006807 | 0.0092 | slr1998  | GO:0006164 | 0.0062 | slr1914  | GO:0044262 | 0.0045 | slr0400  | GO:0044249 | 0.0035 | sll18040 | GO:0006730 | 0.0021 |
| ssl3573  | GO:0006807 | 0.0092 | slr1270  | GO:0006164 | 0.0062 | sll11004 | GO:0044262 | 0.0045 | sll10176 | GO:0044249 | 0.0035 | slr1577  | GO:0005976 | 0.0021 |
| ssr3570  | GO:0006807 | 0.0092 | ssr0335  | GO:0006164 | 0.0062 | slr0400  | GO:0044262 | 0.0045 | sll10853 | GO:0044249 | 0.0035 | sll10939 | GO:0005976 | 0.0021 |
| slr1241  | GO:0006807 | 0.0092 | slr0890  | GO:0006164 | 0.0062 | ssr7072  | GO:0044262 | 0.0045 | sll11571 | GO:0044249 | 0.0035 | slr0692  | GO:0006730 | 0.0021 |
| slr0326  | GO:0006807 | 0.0092 | slr1342  | GO:0006164 | 0.0062 | sll11735 | GO:0044262 | 0.0045 | slr1384  | GO:0044249 | 0.0035 | ssr0109  | GO:0006730 | 0.0021 |
| slr0667  | GO:0006807 | 0.0092 | slr6006  | GO:0006164 | 0.0062 | slr1657  | GO:0044262 | 0.0045 | slr7081  | GO:0044249 | 0.0035 | slr0976  | GO:0006730 | 0.0021 |
| slr7071  | GO:0006807 | 0.0092 | sll11863 | GO:0006164 | 0.0062 | slr0960  | GO:0044262 | 0.0045 | sll18032 | GO:0044249 | 0.0035 | slr6022  | GO:0006730 | 0.0021 |
| sll17031 | GO:0006807 | 0.0092 | slr1189  | GO:0006164 | 0.0062 | slr1956  | GO:0044262 | 0.0045 | ss12749  | GO:0044249 | 0.0035 | sll11095 | GO:0006730 | 0.0021 |
| slr0587  | GO:0006807 | 0.0092 | slr1097  | GO:0006164 | 0.0062 | sll10237 | GO:0030001 | 0.0045 | sll11163 | GO:0044249 | 0.0035 | slr6088  | GO:0005976 | 0.0021 |
| sll11476 | GO:0006807 | 0.0092 | sll11606 | GO:0006164 | 0.0062 | sll10174 | GO:0044262 | 0.0045 | sll10547 | GO:0044249 | 0.0035 | slr1444  | GO:0016070 | 0.0021 |
| slr6071  | GO:0006807 | 0.0092 | sll17064 | GO:0006164 | 0.0062 | sll10994 | GO:0044262 | 0.0045 | sll10611 | GO:0044249 | 0.0035 | slr0731  | GO:0005976 | 0.0021 |
| slr1513  | GO:0006807 | 0.0092 | slr0769  | GO:0006164 | 0.0062 | sll10630 | GO:0044262 | 0.0045 | sll11965 | GO:0005216 | 0.0035 | sll11009 | GO:0005976 | 0.0021 |
| sll10875 | GO:0006807 | 0.0092 | slr0642  | GO:0006950 | 0.0062 | slr0204  | GO:0030001 | 0.0045 | slr0519  | GO:0005216 | 0.0035 | slr2018  | GO:0030001 | 0.0021 |
| sll15132 | GO:0006807 | 0.0092 | ssr1766  | GO:0006164 | 0.0062 | sll11552 | GO:0044262 | 0.0045 | sll10280 | GO:0005216 | 0.0035 | slr1951  | GO:0006730 | 0.0021 |
| sll18012 | GO:0006807 | 0.0092 | sll11766 | GO:0006164 | 0.0062 | sgl0002  | GO:0044262 | 0.0045 | ssr2755  | GO:0005216 | 0.0035 | slr1114  | GO:0006730 | 0.0021 |
| slr0516  | GO:0006807 | 0.0092 | slr1468  | GO:0006164 | 0.0062 | sll10497 | GO:0030001 | 0.0045 | slr0392  | GO:0005216 | 0.0035 | slr1702  | GO:0044262 | 0.0021 |
| sll10563 | GO:0006807 | 0.0092 | sll11477 | GO:0006950 | 0.0062 | sll11504 | GO:0044262 | 0.0045 | sll10982 | GO:0005216 | 0.0035 | ssr1041  | GO:0006730 | 0.0021 |
| ss15103  | GO:0006807 | 0.0092 | slr0151  | GO:0006164 | 0.0062 | slr0148  | GO:0044262 | 0.0045 | sll11736 | GO:0005216 | 0.0035 | slr1737  | GO:0005976 | 0.0021 |
| sll10327 | GO:0006807 | 0.0092 | slr1813  | GO:0006164 | 0.0062 | ss11923  | GO:0044262 | 0.0045 | slr1618  | GO:0005216 | 0.0035 | ss11552  | GO:0006730 | 0.0021 |
| slr1327  | GO:0006807 | 0.0092 | slr7037  | GO:0006164 | 0.0062 | sll10872 | GO:0044262 | 0.0045 | ss10352  | GO:0005216 | 0.0035 | ss11046  | GO:0006730 | 0.0021 |
| slr5112  | GO:0006807 | 0.0092 | slr0514  | GO:0016810 | 0.0062 | ssr7036  | GO:0044262 | 0.0045 | sll10185 | GO:0005216 | 0.0035 | sll11573 | GO:0006730 | 0.0021 |
| ssl7039  | GO:0006807 | 0.0092 | slr1098  | GO:0016810 | 0.0062 | slr1342  | GO:0044262 | 0.0045 | slr0431  | GO:0005216 | 0.0035 | slr1624  | GO:0005976 | 0.0021 |
| ssr2333  | GO:0006807 | 0.0092 | slr0589  | GO:0016810 | 0.0062 | ssr1951  | GO:0044262 | 0.0045 | slr1913  | GO:0005216 | 0.0035 | sll18027 | GO:0005976 | 0.0021 |
| sll11832 | GO:0006807 | 0.0092 | sll11751 | GO:0016810 | 0.0062 | slr2121  | GO:0030001 | 0.0045 | slr1573  | GO:0005216 | 0.0035 | sll10253 | GO:0005976 | 0.0021 |
| ssl2162  | GO:0006807 | 0.0092 | slr1143  | GO:0016810 | 0.0062 | sll16053 | GO:0044262 | 0.0045 | sll10414 | GO:0005216 | 0.0035 | ssr0759  | GO:0006730 | 0.0021 |
| ssl5025  | GO:0006807 | 0.0092 | ssr1391  | GO:0016810 | 0.0062 | sll10775 | GO:0044262 | 0.0045 | sll10381 | GO:0005216 | 0.0035 | slr2117  | GO:0005976 | 0.0021 |
| ssl7038  | GO:0006807 | 0.0092 | slr1307  | GO:0016810 | 0.0062 | slr0592  | GO:0044262 | 0.0045 | ss10242  | GO:0005216 | 0.0035 | ss12384  | GO:0006730 | 0.0021 |
| sll16052 | GO:0006807 | 0.0092 | slr0740  | GO:0016810 | 0.0062 | slr6021  | GO:0044262 | 0.0045 | slr1275  | GO:0005216 | 0.0035 | ssr3402  | GO:0006730 | 0.0021 |
| slr5073  | GO:0006807 | 0.0092 | slr0609  | GO:0016810 | 0.0062 | sll10241 | GO:0044262 | 0.0045 | slr0360  | GO:0005216 | 0.0035 | ss11300  | GO:0005976 | 0.0021 |
| sll10098 | GO:0006807 | 0.0092 | ss12996  | GO:0016810 | 0.0062 | sll11130 | GO:0044262 | 0.0045 | slr0204  | GO:0005216 | 0.0035 | slr6075  | GO:0006730 | 0.0021 |
| slr0575  | GO:0006807 | 0.0092 | slr1444  | GO:0016810 | 0.0062 | slr0770  | GO:0030001 | 0.0045 | sll11315 | GO:0005216 | 0.0035 | sll15030 | GO:0006730 | 0.0021 |
| ss15008  | GO:0006807 | 0.0092 | sll11352 | GO:0006886 | 0.0061 | slr1275  | GO:0030001 | 0.0045 | slr0386  | GO:0005216 | 0.0035 | slr6051  | GO:0005976 | 0.0021 |
| slr0689  | GO:0006807 | 0.0092 | sll10446 | GO:0006259 | 0.0061 | slr1223  | GO:0044262 | 0.0045 | slr1638  | GO:0005216 | 0.0035 | sll10608 | GO:0006730 | 0.0021 |
| slr1816  | GO:0006807 | 0.0092 | sll10981 | GO:0006886 | 0.0061 | ss13383  | GO:0044262 | 0.0045 | slr0482  | GO:0005216 | 0.0035 | slr1789  | GO:0006730 | 0.0021 |
| slr6081  | GO:0006807 | 0.0092 | slr0249  | GO:0006886 | 0.0061 | sll10886 | GO:0044262 | 0.0045 | sll10066 | GO:0005216 | 0.0035 | ss15103  | GO:0005976 | 0.0021 |
| ss10788  | GO:0006807 | 0.0092 | sll1201  | GO:0006886 | 0.0061 | sll10802 | GO:0044262 | 0.0045 | slr1667  | GO:0005216 | 0.0035 | sll10858 | GO:0006730 | 0.0021 |
| slr6009  | GO:0006807 | 0.0092 | sll11925 | GO:0006886 | 0.0061 | sll11736 | GO:0030001 | 0.0045 | sll11632 | GO:0005216 | 0.0035 | sll10563 | GO:0006730 | 0.0021 |
| slr0865  | GO:0006807 | 0.0092 | slr2125  | GO:0006886 | 0.0061 | sll10397 | GO:0044262 | 0.0045 | ssr1765  | GO:0005216 | 0.0035 | sll10175 | GO:0016070 | 0.0021 |
| sll15028 | GO:0006807 | 0.0092 | ssr1552  | GO:0006886 | 0.0061 | slr1768  | GO:0044262 | 0.0045 | slr1964  | GO:0005216 | 0.0035 | sll10310 | GO:0030001 | 0.0021 |
| sll11233 | GO:0006807 | 0.0092 | slr0742  | GO:0006886 | 0.0061 | sll11162 | GO:0044262 | 0.0045 | ssr2962  | GO:0005216 | 0.0035 | sll10272 | GO:0046873 | 0.0021 |
| ssl2069  | GO:0006807 | 0.0092 | slr0207  | GO:0006886 | 0.0061 | slr1161  | GO:0044262 | 0.0045 | slr0404  | GO:0005216 | 0.0035 | slr0408  | GO:0046873 | 0.0021 |

|         |            |        |         |            |        |         |            |        |         |            |        |         |            |        |
|---------|------------|--------|---------|------------|--------|---------|------------|--------|---------|------------|--------|---------|------------|--------|
| s111531 | GO:0006807 | 0.0092 | s111173 | GO:0006886 | 0.0061 | ss10738 | GO:0044262 | 0.0045 | s110237 | GO:0005216 | 0.0035 | s111250 | GO:0046873 | 0.0021 |
| slr1737 | GO:0006807 | 0.0092 | slr0642 | GO:0006259 | 0.0061 | s110284 | GO:0044262 | 0.0045 | s111954 | GO:0005216 | 0.0035 | s110103 | GO:0046873 | 0.0021 |
| slr0708 | GO:0006807 | 0.0092 | slr1074 | GO:0006886 | 0.0061 | s110218 | GO:0044262 | 0.0045 | s111830 | GO:0005216 | 0.0035 | ssr2201 | GO:0046873 | 0.0021 |
| slr5101 | GO:0006807 | 0.0092 | s111873 | GO:0006886 | 0.0061 | s115090 | GO:0044262 | 0.0045 | slr0668 | GO:0005216 | 0.0035 | s110238 | GO:0046873 | 0.0021 |
| ss13549 | GO:0006807 | 0.0092 | slr0232 | GO:0006886 | 0.0061 | ssr3410 | GO:0044262 | 0.0045 | s110085 | GO:0005216 | 0.0035 | ssr2781 | GO:0046873 | 0.0021 |
| slr1142 | GO:0006807 | 0.0092 | s111654 | GO:0006886 | 0.0061 | s110355 | GO:0046873 | 0.0045 | ssr2615 | GO:0005216 | 0.0035 | s111912 | GO:0046873 | 0.0021 |
| s117055 | GO:0006807 | 0.0092 | slr1895 | GO:0006886 | 0.0061 | slr0941 | GO:0046873 | 0.0045 | slr0587 | GO:0008299 | 0.0034 | ss13291 | GO:0046873 | 0.0021 |
| s111834 | GO:0006807 | 0.0092 | slr1070 | GO:0006886 | 0.0061 | slr0348 | GO:0046873 | 0.0045 | s111652 | GO:0008299 | 0.0034 | s110932 | GO:0046873 | 0.0021 |
| s110565 | GO:0006807 | 0.0092 | s111372 | GO:0006886 | 0.0061 | slr0845 | GO:0046873 | 0.0045 | s110168 | GO:0044238 | 0.0034 | s111902 | GO:0043234 | 0.0021 |
| slr0810 | GO:0006950 | 0.0092 | slr1541 | GO:0006886 | 0.0061 | slr1230 | GO:0046873 | 0.0045 | s117066 | GO:0044238 | 0.0034 | s110272 | GO:0043234 | 0.0021 |
| s110298 | GO:0006807 | 0.0092 | s111344 | GO:0006886 | 0.0061 | ssr2787 | GO:0046873 | 0.0045 | ss10350 | GO:0008299 | 0.0034 | slr1565 | GO:0043234 | 0.0021 |
| slr2000 | GO:0006807 | 0.0092 | s111634 | GO:0006886 | 0.0061 | ssr2439 | GO:0046873 | 0.0045 | slr6074 | GO:0044238 | 0.0034 | ss10832 | GO:0043234 | 0.0021 |
| s110157 | GO:0006807 | 0.0092 | s111040 | GO:0006886 | 0.0061 | slr1275 | GO:0046873 | 0.0045 | s111004 | GO:0044238 | 0.0034 | s111775 | GO:0043234 | 0.0021 |
| slr2060 | GO:0006807 | 0.0092 | slr0765 | GO:0006259 | 0.0061 | s110645 | GO:0046873 | 0.0045 | ssr6079 | GO:0044238 | 0.0034 | s110238 | GO:0043234 | 0.0021 |
| slr2070 | GO:0006807 | 0.0092 | slr1413 | GO:0006886 | 0.0061 | ssr3571 | GO:0046873 | 0.0045 | slr1189 | GO:0044238 | 0.0034 | s110103 | GO:0043234 | 0.0021 |
| slr1537 | GO:0006807 | 0.0092 | slr2120 | GO:0006886 | 0.0061 | slr1203 | GO:0046873 | 0.0045 | s111355 | GO:0044238 | 0.0034 | ssr2803 | GO:0043234 | 0.0021 |
| s110691 | GO:0006807 | 0.0092 | slr0981 | GO:0006886 | 0.0061 | slr1999 | GO:0046873 | 0.0045 | slr0619 | GO:0044238 | 0.0034 | s110763 | GO:0043234 | 0.0021 |
| s117034 | GO:0006807 | 0.0092 | s110252 | GO:0004871 | 0.0061 | s110177 | GO:0046873 | 0.0045 | slr0870 | GO:0044238 | 0.0034 | ssr2201 | GO:0043234 | 0.0021 |
| s111158 | GO:0006807 | 0.0092 | slr0345 | GO:0006629 | 0.006  | s111830 | GO:0046873 | 0.0045 | ssr2912 | GO:0044238 | 0.0034 | slr0317 | GO:0043234 | 0.0021 |
| ss18039 | GO:0006807 | 0.0092 | slr6033 | GO:0006629 | 0.006  | s111761 | GO:0046873 | 0.0045 | slr1648 | GO:0044262 | 0.0034 | s110932 | GO:0043234 | 0.0021 |
| slr8044 | GO:0006807 | 0.0092 | ssr2067 | GO:0006629 | 0.006  | slr0204 | GO:0046873 | 0.0045 | slr2101 | GO:0044238 | 0.0034 | slr1110 | GO:0043234 | 0.0021 |
| s110162 | GO:0006807 | 0.0092 | s117086 | GO:0006629 | 0.006  | slr1084 | GO:0046873 | 0.0045 | slr6047 | GO:0044238 | 0.0034 | s111424 | GO:0043234 | 0.0021 |
| s115089 | GO:0006807 | 0.0092 | s110608 | GO:0006396 | 0.006  | slr1932 | GO:0046873 | 0.0045 | s110497 | GO:0044262 | 0.0034 | s111969 | GO:0043234 | 0.0021 |
| slr0303 | GO:0006807 | 0.0092 | ss12384 | GO:0006396 | 0.006  | s111442 | GO:0046873 | 0.0045 | s111882 | GO:0008299 | 0.0034 | s111912 | GO:0043234 | 0.0021 |
| ssr2553 | GO:0006807 | 0.0092 | slr0613 | GO:0006396 | 0.006  | s110676 | GO:0046873 | 0.0045 | slr6087 | GO:0008299 | 0.0034 | slr2084 | GO:0043234 | 0.0021 |
| s117087 | GO:0006807 | 0.0092 | slr0692 | GO:0006629 | 0.006  | s110243 | GO:0046873 | 0.0045 | ssr1766 | GO:0044238 | 0.0034 | slr0442 | GO:0043234 | 0.0021 |
| s110031 | GO:0006807 | 0.0092 | s110596 | GO:0006886 | 0.006  | s111658 | GO:0046873 | 0.0045 | slr6090 | GO:0044238 | 0.0034 | slr0848 | GO:0043234 | 0.0021 |
| ssr2972 | GO:0006807 | 0.0092 | slr0708 | GO:0006629 | 0.006  | s110785 | GO:0046873 | 0.0045 | ss10352 | GO:0006730 | 0.0034 | s110606 | GO:0043234 | 0.0021 |
| slr0731 | GO:0006807 | 0.0092 | slr2117 | GO:0006396 | 0.006  | s111954 | GO:0046873 | 0.0045 | slr1270 | GO:0044238 | 0.0034 | slr0919 | GO:0043234 | 0.0021 |
| slr0498 | GO:0006807 | 0.0092 | s117028 | GO:0006396 | 0.006  | s110497 | GO:0046873 | 0.0045 | s110678 | GO:0008299 | 0.0034 | s110286 | GO:0043234 | 0.0021 |
| s110552 | GO:0006807 | 0.0092 | ss15025 | GO:0006629 | 0.006  | slr1778 | GO:0046873 | 0.0045 | slr1195 | GO:0044238 | 0.0034 | ssr1258 | GO:0043234 | 0.0021 |
| slr0313 | GO:0006807 | 0.0092 | slr1241 | GO:0006629 | 0.006  | slr2011 | GO:0046873 | 0.0045 | slr6039 | GO:0044238 | 0.0034 | slr0980 | GO:0043234 | 0.0021 |
| slr0517 | GO:0006807 | 0.0092 | ss16035 | GO:0006396 | 0.006  | s111530 | GO:0046873 | 0.0045 | slr1854 | GO:0044262 | 0.0034 | slr1906 | GO:0044238 | 0.002  |
| slr0238 | GO:0006807 | 0.0092 | slr5102 | GO:0006396 | 0.006  | slr0192 | GO:0046873 | 0.0045 | slr2105 | GO:0044238 | 0.0034 | slr0144 | GO:0009116 | 0.002  |
| ssr7079 | GO:0006807 | 0.0092 | s110996 | GO:0006886 | 0.006  | s111086 | GO:0046873 | 0.0045 | slr0326 | GO:0008299 | 0.0034 | s111563 | GO:0009116 | 0.002  |
| s118019 | GO:0006807 | 0.0092 | slr1474 | GO:0006629 | 0.006  | s111563 | GO:0046873 | 0.0045 | slr1880 | GO:0044262 | 0.0034 | slr0516 | GO:0016070 | 0.002  |
| s111911 | GO:0006807 | 0.0092 | slr2052 | GO:0006629 | 0.006  | slr0770 | GO:0046873 | 0.0045 | slr1188 | GO:0044238 | 0.0034 | slr5087 | GO:0016070 | 0.002  |
| s111380 | GO:0006807 | 0.0092 | ssr6089 | GO:0006629 | 0.006  | slr1073 | GO:0046873 | 0.0045 | ss10461 | GO:0044238 | 0.0034 | slr1959 | GO:0044238 | 0.002  |
| s117030 | GO:0006807 | 0.0092 | slr1601 | GO:0006629 | 0.006  | s111504 | GO:0043234 | 0.0045 | s110867 | GO:0044238 | 0.0034 | s110361 | GO:0044238 | 0.002  |
| ssr7035 | GO:0006807 | 0.0092 | slr0082 | GO:0006396 | 0.006  | ss13451 | GO:0043234 | 0.0045 | s110085 | GO:0044262 | 0.0034 | s110586 | GO:0044238 | 0.002  |
| slr2052 | GO:0006807 | 0.0092 | slr1056 | GO:0006629 | 0.006  | s118002 | GO:0043234 | 0.0045 | slr0294 | GO:0006730 | 0.0034 | s111052 | GO:0016070 | 0.002  |
| slr0863 | GO:0006807 | 0.0092 | ssr2553 | GO:0006629 | 0.006  | ssr1499 | GO:0043234 | 0.0045 | slr6008 | GO:0044238 | 0.0034 | s111191 | GO:0016070 | 0.002  |
| s110249 | GO:0006807 | 0.0092 | slr1174 | GO:0006396 | 0.006  | slr6013 | GO:0043234 | 0.0045 | s111265 | GO:0044238 | 0.0034 | slr0184 | GO:0016070 | 0.002  |
| ssr2975 | GO:0006807 | 0.0092 | ssr6002 | GO:0006629 | 0.006  | s110266 | GO:0043234 | 0.0045 | s110456 | GO:0044262 | 0.0034 | slr0241 | GO:0016070 | 0.002  |
| s117078 | GO:0006807 | 0.0092 | slr0730 | GO:0006629 | 0.006  | slr6067 | GO:0043234 | 0.0045 | s111939 | GO:0044238 | 0.0034 | slr1789 | GO:0016070 | 0.002  |
| ss17042 | GO:0006807 | 0.0092 | s111135 | GO:0006886 | 0.006  | slr0092 | GO:0043234 | 0.0045 | slr6103 | GO:0008299 | 0.0034 | s117070 | GO:0016070 | 0.002  |
| slr0755 | GO:0006807 | 0.0092 | s111321 | GO:0006396 | 0.006  | slr1150 | GO:0043234 | 0.0045 | slr1241 | GO:0008299 | 0.0034 | slr0921 | GO:0009116 | 0.002  |
| s111882 | GO:0006807 | 0.0092 | s111036 | GO:0006629 | 0.006  | s110802 | GO:0043234 | 0.0045 | slr1863 | GO:0044238 | 0.0034 | slr1073 | GO:0009116 | 0.002  |
| slr6045 | GO:0006807 | 0.0092 | ssr1768 | GO:0006629 | 0.006  | slr0606 | GO:0043234 | 0.0045 | s115128 | GO:0008299 | 0.0034 | slr8021 | GO:0016070 | 0.002  |
| slr1866 | GO:0007154 | 0.0091 | s110563 | GO:0006396 | 0.006  | slr0302 | GO:0043234 | 0.0045 | ssr1155 | GO:0008299 | 0.0034 | ss16035 | GO:0016070 | 0.002  |
| slr1194 | GO:0007154 | 0.0091 | slr0914 | GO:0006629 | 0.006  | slr1035 | GO:0043234 | 0.0045 | slr1179 | GO:0044238 | 0.0034 | s111717 | GO:0016070 | 0.002  |
| slr0345 | GO:0006950 | 0.0091 | s118035 | GO:0006396 | 0.006  | ss11923 | GO:0043234 | 0.0045 | s111722 | GO:0044238 | 0.0034 | s110309 | GO:0009116 | 0.002  |
| slr6071 | GO:0006950 | 0.0091 | slr0184 | GO:0006629 | 0.006  | s110913 | GO:0043234 | 0.0045 | slr6080 | GO:0044238 | 0.0034 | slr0909 | GO:0044238 | 0.002  |
| ssr1041 | GO:0006950 | 0.0091 | s111834 | GO:0006396 | 0.006  | slr1260 | GO:0043234 | 0.0045 | s111911 | GO:0008299 | 0.0034 | slr1215 | GO:0006259 | 0.002  |

|         |            |        |          |            |       |          |            |        |         |            |        |          |            |        |
|---------|------------|--------|----------|------------|-------|----------|------------|--------|---------|------------|--------|----------|------------|--------|
| slr7026 | G0:0006950 | 0.0091 | slr1599  | G0:0006629 | 0.006 | ssr2422  | G0:0043234 | 0.0045 | slr1566 | G0:0044238 | 0.0034 | sl11442  | G0:0009116 | 0.002  |
| ssr5121 | G0:0006950 | 0.0091 | sl11285  | G0:0006629 | 0.006 | sl11722  | G0:0043234 | 0.0045 | sl11949 | G0:0006730 | 0.0034 | slr0082  | G0:0016070 | 0.002  |
| sl11702 | G0:0006950 | 0.0091 | slr6103  | G0:0006396 | 0.006 | slr0049  | G0:0043234 | 0.0045 | sl10553 | G0:0044238 | 0.0034 | slr0514  | G0:0044238 | 0.002  |
| sl11586 | G0:0007154 | 0.0091 | sl11652  | G0:0006629 | 0.006 | sl10994  | G0:0043234 | 0.0045 | slr0038 | G0:0044238 | 0.0034 | ss11046  | G0:0016070 | 0.002  |
| slr1396 | G0:0006950 | 0.0091 | ssr7079  | G0:0006396 | 0.006 | slr1576  | G0:0043234 | 0.0045 | slr6004 | G0:0044238 | 0.0034 | slr1087  | G0:0016070 | 0.002  |
| sl11784 | G0:0006950 | 0.0091 | sl10230  | G0:0006396 | 0.006 | slr2119  | G0:0043234 | 0.0045 | slr0863 | G0:0008299 | 0.0034 | sl10756  | G0:0009116 | 0.002  |
| ss15008 | G0:0006950 | 0.0091 | slr0863  | G0:0006629 | 0.006 | ss15031  | G0:0043234 | 0.0045 | slr1819 | G0:0008299 | 0.0034 | sl11340  | G0:0016070 | 0.002  |
| sl17077 | G0:0006950 | 0.0091 | ss15025  | G0:0006396 | 0.006 | sl10553  | G0:0043234 | 0.0045 | sl10532 | G0:0006730 | 0.0034 | slr7100  | G0:0016070 | 0.002  |
| slr1045 | G0:0007154 | 0.0091 | sl10442  | G0:0006396 | 0.006 | slr6049  | G0:0043234 | 0.0045 | sl11002 | G0:0044262 | 0.0034 | slr0238  | G0:0016070 | 0.002  |
| slr0376 | G0:0007154 | 0.0091 | ssr3570  | G0:0006629 | 0.006 | ssr1766  | G0:0043234 | 0.0045 | sl10479 | G0:0008299 | 0.0034 | sl18019  | G0:0016070 | 0.002  |
| sl10405 | G0:0006950 | 0.0091 | ssr6062  | G0:0006396 | 0.006 | slr7083  | G0:0043234 | 0.0045 | ss11690 | G0:0008299 | 0.0034 | sl11089  | G0:0016070 | 0.002  |
| slr0453 | G0:0006950 | 0.0091 | slr0273  | G0:0006396 | 0.006 | slr0912  | G0:0043234 | 0.0045 | sl11086 | G0:0006730 | 0.0034 | sl11675  | G0:0009116 | 0.002  |
| ssr3572 | G0:0006950 | 0.0091 | ssr3572  | G0:0006629 | 0.006 | sl115097 | G0:0043234 | 0.0045 | slr1964 | G0:0006730 | 0.0034 | slr1599  | G0:0016070 | 0.002  |
| ssr6062 | G0:0006950 | 0.0091 | slr2117  | G0:0006629 | 0.006 | slr0151  | G0:0043234 | 0.0045 | ssr3570 | G0:0008299 | 0.0034 | slr1210  | G0:0009116 | 0.002  |
| slr1681 | G0:0006950 | 0.0091 | slr7102  | G0:0006396 | 0.006 | sl11916  | G0:0043234 | 0.0045 | sl10066 | G0:0006730 | 0.0034 | ss17021  | G0:0016070 | 0.002  |
| ssr7079 | G0:0006950 | 0.0091 | slr0967  | G0:0006629 | 0.006 | sl11766  | G0:0043234 | 0.0045 | sl11736 | G0:0006730 | 0.0034 | sl10678  | G0:0016070 | 0.002  |
| slr1911 | G0:0006950 | 0.0091 | ss17007  | G0:0006396 | 0.006 | slr1378  | G0:0043234 | 0.0045 | sl10167 | G0:0044238 | 0.0034 | slr6029  | G0:0016070 | 0.002  |
| sl10552 | G0:0006950 | 0.0091 | slr1394  | G0:0006629 | 0.006 | sl11770  | G0:0043234 | 0.0045 | slr6065 | G0:0044238 | 0.0034 | slr0519  | G0:0009116 | 0.002  |
| ss17021 | G0:0006950 | 0.0091 | slr1915  | G0:0006629 | 0.006 | sl11252  | G0:0043234 | 0.0045 | sl15090 | G0:0044238 | 0.0034 | sl18011  | G0:0016070 | 0.002  |
| slr2003 | G0:0006950 | 0.0091 | slr2027  | G0:0006396 | 0.006 | slr1223  | G0:0043234 | 0.0045 | sl10023 | G0:0006730 | 0.0034 | slr0285  | G0:0016070 | 0.002  |
| slr1628 | G0:0006950 | 0.0091 | slr0667  | G0:0006629 | 0.006 | sl11378  | G0:0043234 | 0.0045 | sl10062 | G0:0008299 | 0.0034 | ssr2972  | G0:0016070 | 0.002  |
| sl10327 | G0:0006950 | 0.0091 | slr1290  | G0:0006629 | 0.006 | sl11447  | G0:0043234 | 0.0045 | slr1396 | G0:0008299 | 0.0034 | slr0364  | G0:0009116 | 0.002  |
| sl11915 | G0:0006950 | 0.0091 | sl11698  | G0:0006629 | 0.006 | sl18004  | G0:0043234 | 0.0045 | sl10860 | G0:0044238 | 0.0034 | sl11086  | G0:0009116 | 0.002  |
| slr6068 | G0:0006950 | 0.0091 | slr0551  | G0:0006886 | 0.006 | slr0598  | G0:0043234 | 0.0045 | ssr2554 | G0:0044238 | 0.0034 | slr1644  | G0:0006807 | 0.002  |
| sl15128 | G0:0006950 | 0.0091 | slr1441  | G0:0006886 | 0.006 | ss15129  | G0:0043234 | 0.0045 | sl11696 | G0:0044238 | 0.0034 | slr6091  | G0:0016070 | 0.002  |
| sl11192 | G0:0006950 | 0.0091 | slr0553  | G0:0006886 | 0.006 | slr5119  | G0:0043234 | 0.0045 | sl17028 | G0:0008299 | 0.0034 | ss10467  | G0:0016070 | 0.002  |
| sl18035 | G0:0006950 | 0.0091 | sl10765  | G0:0006629 | 0.006 | sl11485  | G0:0043234 | 0.0045 | ss12471 | G0:0044238 | 0.0034 | sl11652  | G0:0016070 | 0.002  |
| sl10499 | G0:0007154 | 0.0091 | slr6106  | G0:0006396 | 0.006 | sl11939  | G0:0043234 | 0.0045 | sl10811 | G0:0044238 | 0.0034 | slr5073  | G0:0016070 | 0.002  |
| sl10525 | G0:0006950 | 0.0091 | slr6081  | G0:0006629 | 0.006 | ssr0335  | G0:0043234 | 0.0045 | slr5021 | G0:0044238 | 0.0034 | slr7073  | G0:0016070 | 0.002  |
| slr0587 | G0:0006950 | 0.0091 | slr5073  | G0:0006629 | 0.006 | slr6047  | G0:0043234 | 0.0045 | slr1262 | G0:0006730 | 0.0034 | sl11151  | G0:0016070 | 0.002  |
| slr6106 | G0:0006950 | 0.0091 | sl10496  | G0:0006396 | 0.006 | slr0031  | G0:0043234 | 0.0045 | sl11321 | G0:0008299 | 0.0034 | ss10350  | G0:0016070 | 0.002  |
| slr0771 | G0:0006950 | 0.0091 | ss17074  | G0:0006629 | 0.006 | sl116053 | G0:0043234 | 0.0045 | slr1599 | G0:0008299 | 0.0034 | slr0397  | G0:0006790 | 0.0019 |
| slr0610 | G0:0006950 | 0.0091 | slr1023  | G0:0006886 | 0.006 | ssr5120  | G0:0043234 | 0.0045 | sl10066 | G0:0044262 | 0.0034 | slr0975  | G0:0006725 | 0.0019 |
| sl10069 | G0:0006950 | 0.0091 | slr0157  | G0:0006886 | 0.006 | sl118033 | G0:0043234 | 0.0045 | slr0013 | G0:0008299 | 0.0034 | sl11089  | G0:0006790 | 0.0019 |
| ss13692 | G0:0007154 | 0.0091 | ssr2067  | G0:0006396 | 0.006 | slr0196  | G0:0043234 | 0.0045 | sl10423 | G0:0044238 | 0.0034 | slr1143  | G0:0016051 | 0.0019 |
| sl10098 | G0:0006950 | 0.0091 | sl10160  | G0:0006629 | 0.006 | slr1677  | G0:0043234 | 0.0045 | sl11400 | G0:0044238 | 0.0034 | ssr1256  | G0:0044238 | 0.0019 |
| slr1601 | G0:0006950 | 0.0091 | ssr0657  | G0:0006396 | 0.006 | sl117047 | G0:0043234 | 0.0045 | slr0959 | G0:0044238 | 0.0034 | sl11512  | G0:0006725 | 0.0019 |
| ssr1425 | G0:0006950 | 0.0091 | slr6087  | G0:0006396 | 0.006 | sl111163 | G0:0043234 | 0.0045 | slr1577 | G0:0008299 | 0.0034 | sl11562  | G0:0016051 | 0.0019 |
| ss15100 | G0:0006950 | 0.0091 | ss11300  | G0:0006396 | 0.006 | ss12148  | G0:0043234 | 0.0045 | sl11262 | G0:0044262 | 0.0034 | sl10496  | G0:0006790 | 0.0019 |
| ss17039 | G0:0006950 | 0.0091 | slr1398  | G0:0006886 | 0.006 | sl10493  | G0:0043234 | 0.0045 | slr1315 | G0:0044238 | 0.0034 | slr0978  | G0:0016051 | 0.0019 |
| slr1206 | G0:0006950 | 0.0091 | slr1944  | G0:0006629 | 0.006 | slr1189  | G0:0043234 | 0.0045 | sl10241 | G0:0044238 | 0.0034 | slr1623  | G0:0006790 | 0.0019 |
| sl10096 | G0:0007154 | 0.0091 | ss10109  | G0:0006886 | 0.006 | ss15007  | G0:0043234 | 0.0045 | sl11785 | G0:0008299 | 0.0034 | slr1851  | G0:0016051 | 0.0019 |
| slr1107 | G0:0007154 | 0.0091 | ss18039  | G0:0006629 | 0.006 | ssr6026  | G0:0043234 | 0.0045 | slr1932 | G0:0006730 | 0.0034 | ssr2972  | G0:0006790 | 0.0019 |
| sl11609 | G0:0006950 | 0.0091 | sl117031 | G0:0006396 | 0.006 | slr0971  | G0:0043234 | 0.0045 | slr6031 | G0:0044238 | 0.0034 | slr2060  | G0:0006790 | 0.0019 |
| ss18028 | G0:0006950 | 0.0091 | ssr6027  | G0:0006629 | 0.006 | sl11092  | G0:0043234 | 0.0045 | sl10060 | G0:0008299 | 0.0034 | sl11911  | G0:0006790 | 0.0019 |
| slr0914 | G0:0006950 | 0.0091 | slr0634  | G0:0006396 | 0.006 | sl11401  | G0:0043234 | 0.0045 | slr7080 | G0:0044238 | 0.0034 | ssr6086  | G0:0006790 | 0.0019 |
| ssr2047 | G0:0006950 | 0.0091 | sl11380  | G0:0006396 | 0.006 | sl10710  | G0:0043234 | 0.0045 | slr1468 | G0:0044238 | 0.0034 | sl115132 | G0:0006790 | 0.0019 |
| slr6081 | G0:0006950 | 0.0091 | slr0416  | G0:0006629 | 0.006 | sl10872  | G0:0043234 | 0.0045 | slr0769 | G0:0044238 | 0.0034 | slr0587  | G0:0006790 | 0.0019 |
| sl11891 | G0:0006950 | 0.0091 | slr0948  | G0:0006396 | 0.006 | sl10762  | G0:0043234 | 0.0045 | ssr6030 | G0:0008299 | 0.0034 | sl11715  | G0:0006520 | 0.0019 |
| slr7073 | G0:0006950 | 0.0091 | sl115089 | G0:0006629 | 0.006 | ssr1407  | G0:0043234 | 0.0045 | slr0865 | G0:0008299 | 0.0034 | sl110788 | G0:0016051 | 0.0019 |
| ssr5092 | G0:0006950 | 0.0091 | ssr3467  | G0:0006629 | 0.006 | slr1484  | G0:0043234 | 0.0045 | slr0651 | G0:0008299 | 0.0034 | sl111166 | G0:0006520 | 0.0019 |
| slr0326 | G0:0006950 | 0.0091 | ssr6083  | G0:0006629 | 0.006 | ss11520  | G0:0043234 | 0.0045 | sl10545 | G0:0044238 | 0.0034 | slr1071  | G0:0006725 | 0.0019 |
| slr0269 | G0:0006950 | 0.0091 | slr5013  | G0:0006396 | 0.006 | slr1342  | G0:0043234 | 0.0045 | slr1339 | G0:0044238 | 0.0034 | sl10172  | G0:0006790 | 0.0019 |
| ss15025 | G0:0006950 | 0.0091 | ssr2060  | G0:0006629 | 0.006 | slr6005  | G0:0043234 | 0.0045 | slr1260 | G0:0044238 | 0.0034 | ss10787  | G0:0006520 | 0.0019 |

|         |            |        |         |            |        |         |            |        |         |            |        |         |            |        |
|---------|------------|--------|---------|------------|--------|---------|------------|--------|---------|------------|--------|---------|------------|--------|
| ssr6086 | GO:0006950 | 0.0091 | ss15103 | GO:0006396 | 0.006  | slr1768 | GO:0043234 | 0.0045 | ssr2551 | GO:0006730 | 0.0034 | slr1762 | GO:0006725 | 0.0019 |
| ssr2318 | GO:0006950 | 0.0091 | ssr6030 | GO:0006629 | 0.006  | slr7080 | GO:0043234 | 0.0045 | slr1970 | GO:0008299 | 0.0034 | slr1194 | GO:0006520 | 0.0019 |
| ss15113 | GO:0006950 | 0.0091 | sl11609 | GO:0006396 | 0.006  | slr0552 | GO:0043234 | 0.0045 | sl10930 | GO:0044238 | 0.0034 | ssr7017 | GO:0006790 | 0.0019 |
| slr0039 | GO:0006950 | 0.0091 | slr0480 | GO:0006886 | 0.006  | slr0907 | GO:0043234 | 0.0045 | slr0552 | GO:0044238 | 0.0034 | sl10327 | GO:0006790 | 0.0019 |
| sl10931 | GO:0016772 | 0.0091 | slr0241 | GO:0006396 | 0.006  | slr1397 | GO:0043234 | 0.0045 | ssr3341 | GO:0044238 | 0.0034 | slr0980 | GO:0044238 | 0.0019 |
| sl10149 | GO:0017111 | 0.009  | sl10360 | GO:0006886 | 0.006  | sl10181 | GO:0043234 | 0.0045 | slr1956 | GO:0044238 | 0.0034 | sl11267 | GO:0006725 | 0.0019 |
| sl10488 | GO:0005515 | 0.009  | slr5013 | GO:0006629 | 0.006  | slr0601 | GO:0043234 | 0.0045 | ssr6024 | GO:0008299 | 0.0034 | sl10910 | GO:0006520 | 0.0019 |
| sl11002 | GO:0008299 | 0.0089 | ss17074 | GO:0006396 | 0.006  | sl11884 | GO:0043234 | 0.0045 | ss12420 | GO:0044238 | 0.0034 | sl10563 | GO:0006790 | 0.0019 |
| slr1571 | GO:0008299 | 0.0089 | slr1970 | GO:0006396 | 0.006  | ss12471 | GO:0043234 | 0.0045 | sl17063 | GO:0044238 | 0.0034 | slr1173 | GO:0006790 | 0.0019 |
| slr1262 | GO:0008299 | 0.0089 | slr0771 | GO:0006396 | 0.006  | slr1863 | GO:0043234 | 0.0045 | sl11863 | GO:0044238 | 0.0034 | slr1690 | GO:0006725 | 0.0019 |
| slr1025 | GO:0006812 | 0.0089 | sl10445 | GO:0016772 | 0.006  | sl11359 | GO:0043234 | 0.0045 | slr0709 | GO:0008299 | 0.0034 | slr1053 | GO:0006725 | 0.0019 |
| ssr2615 | GO:0008299 | 0.0089 | ssr1391 | GO:0044267 | 0.0059 | sl10369 | GO:0043234 | 0.0045 | sl11702 | GO:0008299 | 0.0034 | slr0317 | GO:0044238 | 0.0019 |
| sl11247 | GO:0006812 | 0.0089 | slr1812 | GO:0044237 | 0.0059 | slr7081 | GO:0043234 | 0.0045 | sl10284 | GO:0044238 | 0.0034 | sl11164 | GO:0006790 | 0.0019 |
| slr1034 | GO:0006812 | 0.0089 | slr0514 | GO:0044267 | 0.0059 | sl10371 | GO:0043234 | 0.0045 | slr0914 | GO:0008299 | 0.0034 | sl11775 | GO:0044238 | 0.0019 |
| sl11060 | GO:0006812 | 0.0089 | slr0921 | GO:0006164 | 0.0059 | slr0960 | GO:0043234 | 0.0045 | sl11447 | GO:0044238 | 0.0034 | sl10565 | GO:0006790 | 0.0019 |
| sl11761 | GO:0008299 | 0.0089 | sl11166 | GO:0044267 | 0.0059 | ss12245 | GO:0043234 | 0.0045 | sl18002 | GO:0044238 | 0.0034 | slr0609 | GO:0016051 | 0.0019 |
| sl11913 | GO:0006812 | 0.0089 | sl10237 | GO:0006164 | 0.0059 | slr0505 | GO:0043234 | 0.0045 | slr1885 | GO:0044262 | 0.0034 | slr1087 | GO:0006790 | 0.0019 |
| sl11715 | GO:0006812 | 0.0089 | slr1107 | GO:0044267 | 0.0059 | slr6021 | GO:0043234 | 0.0045 | slr1068 | GO:0044238 | 0.0034 | slr1376 | GO:0006520 | 0.0019 |
| sl10314 | GO:0008299 | 0.0089 | slr0594 | GO:0008299 | 0.0059 | sl10658 | GO:0043234 | 0.0045 | slr1161 | GO:0044238 | 0.0034 | slr0594 | GO:0016051 | 0.0019 |
| slr1194 | GO:0006812 | 0.0089 | slr0360 | GO:0006164 | 0.0059 | sl10293 | GO:0043234 | 0.0045 | slr0199 | GO:0044238 | 0.0034 | sl10577 | GO:0006520 | 0.0019 |
| slr0294 | GO:0008299 | 0.0089 | slr0909 | GO:0044267 | 0.0059 | slr6073 | GO:0043234 | 0.0045 | slr7011 | GO:0044238 | 0.0034 | ss15103 | GO:0006790 | 0.0019 |
| sl10414 | GO:0008299 | 0.0089 | slr1811 | GO:0008299 | 0.0059 | slr7015 | GO:0043234 | 0.0045 | slr8022 | GO:0008299 | 0.0034 | sl11913 | GO:0006520 | 0.0019 |
| sl10996 | GO:0006812 | 0.0089 | slr1674 | GO:0044267 | 0.0059 | sl17075 | GO:0043234 | 0.0045 | sl12013 | GO:0044238 | 0.0034 | slr0208 | GO:0044238 | 0.0019 |
| slr1177 | GO:0008299 | 0.0089 | slr0423 | GO:0044267 | 0.0059 | slr6039 | GO:0043234 | 0.0045 | slr6064 | GO:0044238 | 0.0034 | sl10552 | GO:0006790 | 0.0019 |
| ss10242 | GO:0008299 | 0.0089 | slr1926 | GO:0044267 | 0.0059 | sl10860 | GO:0043234 | 0.0045 | ssr3467 | GO:0008299 | 0.0034 | sl12011 | GO:0006790 | 0.0019 |
| sl10756 | GO:0008299 | 0.0089 | sl10175 | GO:0008299 | 0.0059 | slr0890 | GO:0043234 | 0.0045 | sl10176 | GO:0044238 | 0.0034 | sl17065 | GO:0006725 | 0.0019 |
| sl10301 | GO:0006812 | 0.0089 | sl10783 | GO:0008299 | 0.0059 | slr1914 | GO:0043234 | 0.0045 | ss12148 | GO:0044238 | 0.0034 | ssr5074 | GO:0006790 | 0.0019 |
| ss10352 | GO:0008299 | 0.0089 | slr1726 | GO:0044267 | 0.0059 | ss10461 | GO:0043234 | 0.0045 | slr6028 | GO:0008299 | 0.0034 | slr1327 | GO:0006790 | 0.0019 |
| slr1376 | GO:0006812 | 0.0089 | slr2111 | GO:0006164 | 0.0059 | sl11217 | GO:0043234 | 0.0045 | sl11608 | GO:0044262 | 0.0034 | slr0249 | GO:0006725 | 0.0019 |
| sl11965 | GO:0008299 | 0.0089 | sl10558 | GO:0044267 | 0.0059 | sl10846 | GO:0043234 | 0.0045 | slr0890 | GO:0044238 | 0.0034 | slr1450 | GO:0006790 | 0.0019 |
| sl11675 | GO:0008299 | 0.0089 | slr1066 | GO:0044267 | 0.0059 | slr1187 | GO:0043234 | 0.0045 | slr7025 | GO:0044238 | 0.0034 | ssr2711 | GO:0006790 | 0.0019 |
| slr1799 | GO:0006812 | 0.0089 | slr0431 | GO:0006164 | 0.0059 | slr1273 | GO:0043234 | 0.0045 | sl11832 | GO:0008299 | 0.0034 | slr0594 | GO:0009116 | 0.0019 |
| sl10309 | GO:0008299 | 0.0089 | sl10596 | GO:0044267 | 0.0059 | sl10630 | GO:0043234 | 0.0045 | sl11359 | GO:0044238 | 0.0034 | slr1170 | GO:0006790 | 0.0019 |
| slr0480 | GO:0006812 | 0.0089 | slr0514 | GO:0008299 | 0.0059 | sl10397 | GO:0043234 | 0.0045 | slr1628 | GO:0008299 | 0.0034 | slr1240 | GO:0006725 | 0.0019 |
| slr2073 | GO:0008299 | 0.0089 | sl10822 | GO:0044267 | 0.0059 | slr0038 | GO:0043234 | 0.0045 | sl18033 | GO:0044238 | 0.0034 | slr5087 | GO:0006790 | 0.0019 |
| slr1593 | GO:0008299 | 0.0089 | slr0287 | GO:0044267 | 0.0059 | slr1721 | GO:0043234 | 0.0045 | slr0195 | GO:0044238 | 0.0034 | sl10732 | GO:0016051 | 0.0019 |
| sl11736 | GO:0008299 | 0.0089 | sl11954 | GO:0006164 | 0.0059 | slr1218 | GO:0043234 | 0.0045 | slr7092 | GO:0044238 | 0.0034 | slr0582 | GO:0006790 | 0.0019 |
| sl10499 | GO:0006812 | 0.0089 | slr1441 | GO:0044267 | 0.0059 | slr1306 | GO:0043234 | 0.0045 | sl11461 | GO:0044238 | 0.0034 | sl10451 | GO:0006725 | 0.0019 |
| slr0423 | GO:0006812 | 0.0089 | slr1127 | GO:0044267 | 0.0059 | ss13142 | GO:0043234 | 0.0045 | ssr1407 | GO:0044238 | 0.0034 | sl10854 | GO:0006520 | 0.0019 |
| sl11186 | GO:0006812 | 0.0089 | ssr2787 | GO:0006164 | 0.0059 | slr7097 | GO:0043234 | 0.0045 | slr0967 | GO:0008299 | 0.0034 | slr1290 | GO:0006790 | 0.0019 |
| slr1215 | GO:0016772 | 0.0089 | sl11009 | GO:0030001 | 0.0058 | slr7011 | GO:0043234 | 0.0045 | ss10467 | GO:0008299 | 0.0034 | slr1812 | GO:0019538 | 0.0019 |
| sl10558 | GO:0006139 | 0.0088 | slr0291 | GO:0030001 | 0.0058 | slr6004 | GO:0043234 | 0.0045 | ss12245 | GO:0044238 | 0.0034 | sl17078 | GO:0006790 | 0.0019 |
| ssr1391 | GO:0006139 | 0.0088 | slr0498 | GO:0030001 | 0.0058 | slr2010 | GO:0043234 | 0.0045 | sl10846 | GO:0044238 | 0.0034 | sl10508 | GO:0006520 | 0.0019 |
| sl10586 | GO:0006139 | 0.0088 | slr1623 | GO:0030001 | 0.0058 | slr6008 | GO:0043234 | 0.0045 | slr1676 | GO:0044262 | 0.0034 | slr1307 | GO:0016051 | 0.0019 |
| slr0589 | GO:0006139 | 0.0088 | sl11164 | GO:0030001 | 0.0058 | slr1600 | GO:0043234 | 0.0045 | ss13615 | GO:0008299 | 0.0034 | sl10839 | GO:0006790 | 0.0019 |
| slr1847 | GO:0006139 | 0.0088 | sl10736 | GO:0030001 | 0.0058 | sl11053 | GO:0043234 | 0.0045 | slr7099 | GO:0008299 | 0.0034 | slr1513 | GO:0006790 | 0.0019 |
| slr0740 | GO:0006139 | 0.0088 | sl11714 | GO:0030001 | 0.0058 | slr7058 | GO:0043234 | 0.0045 | slr1079 | GO:0008299 | 0.0034 | ssr2333 | GO:0006790 | 0.0019 |
| slr2018 | GO:0006396 | 0.0088 | ss18028 | GO:0030001 | 0.0058 | slr1095 | GO:0043234 | 0.0045 | ss12162 | GO:0008299 | 0.0034 | slr1338 | GO:0006725 | 0.0019 |
| ss11377 | GO:0006139 | 0.0088 | sl11036 | GO:0030001 | 0.0058 | sl11123 | GO:0043234 | 0.0045 | slr1570 | GO:0008299 | 0.0034 | sl11399 | GO:0006725 | 0.0019 |
| slr0496 | GO:0006139 | 0.0088 | slr6087 | GO:0030001 | 0.0058 | slr2105 | GO:0043234 | 0.0045 | ss18005 | GO:0044238 | 0.0034 | sl10319 | GO:0006725 | 0.0019 |
| sl10022 | GO:0006139 | 0.0088 | slr0634 | GO:0030001 | 0.0058 | slr6063 | GO:0043234 | 0.0045 | slr0269 | GO:0008299 | 0.0034 | ss11377 | GO:0016051 | 0.0019 |
| sl10361 | GO:0006139 | 0.0088 | sl11131 | GO:0030001 | 0.0058 | sl10478 | GO:0043234 | 0.0045 | slr6021 | GO:0044238 | 0.0034 | slr1519 | GO:0006520 | 0.0019 |
| sl11477 | GO:0004518 | 0.0088 | sl10563 | GO:0030001 | 0.0058 | slr0784 | GO:0043234 | 0.0045 | slr0362 | GO:0044238 | 0.0034 | sl10783 | GO:0006520 | 0.0019 |
| slr0108 | GO:0004518 | 0.0088 | sl10847 | GO:0030001 | 0.0058 | slr6038 | GO:0043234 | 0.0045 | slr0976 | GO:0008299 | 0.0034 | slr0345 | GO:0006790 | 0.0019 |

|          |            |        |          |            |        |          |            |        |          |            |        |          |            |        |
|----------|------------|--------|----------|------------|--------|----------|------------|--------|----------|------------|--------|----------|------------|--------|
| slr1591  | GO:0004518 | 0.0088 | sll17078 | GO:0030001 | 0.0058 | slr1468  | GO:0043234 | 0.0045 | slr2144  | GO:0044262 | 0.0034 | sll17055 | GO:0006790 | 0.0019 |
| slr2000  | GO:0006259 | 0.0087 | ssl13573 | GO:0030001 | 0.0058 | ssl5065  | GO:0043234 | 0.0045 | slr5119  | GO:0044238 | 0.0034 | ssr6078  | GO:0006790 | 0.0019 |
| sll10691 | GO:0006259 | 0.0087 | slr0588  | GO:0030001 | 0.0058 | slr1168  | GO:0043234 | 0.0045 | slr6104  | GO:0008299 | 0.0034 | sll11730 | GO:0006725 | 0.0019 |
| ssr5121  | GO:0006259 | 0.0087 | sll11702 | GO:0030001 | 0.0058 | sll10863 | GO:0043234 | 0.0045 | slr1530  | GO:0006730 | 0.0034 | ssl6035  | GO:0006790 | 0.0019 |
| slr0303  | GO:0006259 | 0.0087 | ssr1473  | GO:0030001 | 0.0058 | slr1813  | GO:0043234 | 0.0045 | slr1667  | GO:0044262 | 0.0034 | sll10156 | GO:0006725 | 0.0019 |
| slr6045  | GO:0006259 | 0.0087 | sll10098 | GO:0030001 | 0.0058 | ssr3410  | GO:0043234 | 0.0045 | sll10047 | GO:0008299 | 0.0034 | slr0771  | GO:0006790 | 0.0019 |
| ssl1552  | GO:0006259 | 0.0087 | ssr7035  | GO:0030001 | 0.0058 | ssr6079  | GO:0043234 | 0.0045 | ssl1300  | GO:0008299 | 0.0034 | slr1636  | GO:0019538 | 0.0019 |
| slr5127  | GO:0006259 | 0.0087 | sll18040 | GO:0030001 | 0.0058 | ssr7072  | GO:0043234 | 0.0045 | slr1854  | GO:0006730 | 0.0034 | slr0863  | GO:0006790 | 0.0019 |
| ssl7022  | GO:0006259 | 0.0087 | ssr0759  | GO:0030001 | 0.0058 | sll11155 | GO:0043234 | 0.0045 | slr1618  | GO:0044262 | 0.0034 | sll12006 | GO:0006520 | 0.0019 |
| ssr2975  | GO:0006259 | 0.0087 | slr1241  | GO:0030001 | 0.0058 | slr0769  | GO:0043234 | 0.0045 | sll1691  | GO:0044238 | 0.0034 | ssr6099  | GO:0006790 | 0.0019 |
| sll18019 | GO:0006259 | 0.0087 | slr1474  | GO:0030001 | 0.0058 | ssr2611  | GO:0043234 | 0.0045 | sll1563  | GO:0044262 | 0.0034 | slr0498  | GO:0006790 | 0.0019 |
| slr1570  | GO:0006259 | 0.0087 | sll16055 | GO:0030001 | 0.0058 | sll10448 | GO:0043234 | 0.0045 | ssl0788  | GO:0008299 | 0.0034 | sll11472 | GO:0006520 | 0.0019 |
| slr6103  | GO:0006259 | 0.0087 | slr1911  | GO:0030001 | 0.0058 | sll11862 | GO:0043234 | 0.0045 | slr6014  | GO:0044238 | 0.0034 | slr1780  | GO:0006790 | 0.0019 |
| slr1790  | GO:0006259 | 0.0087 | ssr2047  | GO:0030001 | 0.0058 | sll11469 | GO:0043234 | 0.0045 | sll11162 | GO:0044238 | 0.0034 | sll17030 | GO:0006790 | 0.0019 |
| ssl1918  | GO:0006259 | 0.0087 | ssr2318  | GO:0030001 | 0.0058 | slr0380  | GO:0043234 | 0.0045 | sll1132  | GO:0044238 | 0.0034 | slr1258  | GO:0006725 | 0.0019 |
| slr6051  | GO:0006259 | 0.0087 | ssr6027  | GO:0030001 | 0.0058 | slr1104  | GO:0043234 | 0.0045 | slr0400  | GO:0044238 | 0.0034 | slr6088  | GO:0006790 | 0.0019 |
| ssr7035  | GO:0006259 | 0.0087 | sll15003 | GO:0030001 | 0.0058 | slr7101  | GO:0043234 | 0.0045 | slr0780  | GO:0008299 | 0.0034 | slr1959  | GO:0009116 | 0.0019 |
| sll18027 | GO:0006259 | 0.0087 | ssr6002  | GO:0030001 | 0.0058 | sg10001  | GO:0043234 | 0.0045 | slr1117  | GO:0006730 | 0.0034 | ssr2848  | GO:0006520 | 0.0019 |
| sll17033 | GO:0006259 | 0.0087 | sll17033 | GO:0030001 | 0.0058 | sll17062 | GO:0043234 | 0.0045 | sll10913 | GO:0044238 | 0.0034 | slr1415  | GO:0006725 | 0.0019 |
| sll1285  | GO:0006259 | 0.0087 | sll1832  | GO:0030001 | 0.0058 | slr1270  | GO:0043234 | 0.0045 | sll11155 | GO:0044238 | 0.0034 | slr0271  | GO:0006790 | 0.0019 |
| slr1915  | GO:0006259 | 0.0087 | sll10047 | GO:0030001 | 0.0058 | slr1102  | GO:0043234 | 0.0045 | slr1636  | GO:0016874 | 0.0034 | sll17034 | GO:0006790 | 0.0019 |
| sll17089 | GO:0006259 | 0.0087 | ssl17074 | GO:0030001 | 0.0058 | sll10611 | GO:0043234 | 0.0045 | slr1699  | GO:0016874 | 0.0034 | sll11455 | GO:0006520 | 0.0019 |
| sll15132 | GO:0006259 | 0.0087 | slr2060  | GO:0030001 | 0.0058 | sll11696 | GO:0043234 | 0.0045 | slr1644  | GO:0016820 | 0.0034 | slr2052  | GO:0006790 | 0.0019 |
| sll1381  | GO:0006259 | 0.0087 | ssl1690  | GO:0030001 | 0.0058 | slr0145  | GO:0043234 | 0.0045 | sll10933 | GO:0016772 | 0.0034 | sll10157 | GO:0006790 | 0.0019 |
| ssl13829 | GO:0006259 | 0.0087 | ssl2384  | GO:0030001 | 0.0058 | slr0264  | GO:0043234 | 0.0045 | slr1667  | GO:0044238 | 0.0033 | ssr1258  | GO:0044238 | 0.0019 |
| slr1704  | GO:0006259 | 0.0087 | sll11106 | GO:0030001 | 0.0058 | slr0059  | GO:0043234 | 0.0045 | slr0668  | GO:0044238 | 0.0033 | slr7057  | GO:0006790 | 0.0019 |
| ssl2162  | GO:0006259 | 0.0087 | sll11188 | GO:0030001 | 0.0058 | slr6015  | GO:0043234 | 0.0045 | sll10785 | GO:0044238 | 0.0033 | slr1301  | GO:0006520 | 0.0019 |
| sll10060 | GO:0006259 | 0.0087 | slr0271  | GO:0030001 | 0.0058 | sll10176 | GO:0043234 | 0.0045 | ssr2787  | GO:0044238 | 0.0033 | slr0250  | GO:0006520 | 0.0019 |
| slr0610  | GO:0006259 | 0.0087 | slr6068  | GO:0030001 | 0.0058 | sll15061 | GO:0043234 | 0.0045 | ssl0352  | GO:0044238 | 0.0033 | slr0263  | GO:0006520 | 0.0019 |
| sll10678 | GO:0006259 | 0.0087 | slr1819  | GO:0030001 | 0.0058 | sll11004 | GO:0043234 | 0.0045 | slr1885  | GO:0044238 | 0.0033 | sll11373 | GO:0006790 | 0.0019 |
| sll17086 | GO:0006259 | 0.0087 | slr1173  | GO:0030001 | 0.0058 | sll11511 | GO:0043234 | 0.0045 | sll10007 | GO:0044238 | 0.0033 | sll10822 | GO:0009116 | 0.0019 |
| sll1785  | GO:0006259 | 0.0087 | sll15067 | GO:0030001 | 0.0058 | slr0489  | GO:0043234 | 0.0045 | slr1676  | GO:0044238 | 0.0033 | sll10995 | GO:0006725 | 0.0019 |
| sll1882  | GO:0006259 | 0.0087 | slr0241  | GO:0030001 | 0.0058 | sll10428 | GO:0043234 | 0.0045 | slr1210  | GO:0044238 | 0.0033 | ssr1114  | GO:0006725 | 0.0019 |
| sll15128 | GO:0006259 | 0.0087 | slr0300  | GO:0030001 | 0.0058 | sll10659 | GO:0043234 | 0.0045 | sll11086 | GO:0044238 | 0.0033 | slr0589  | GO:0009116 | 0.0019 |
| sll15089 | GO:0006259 | 0.0087 | slr8022  | GO:0030001 | 0.0058 | sll17063 | GO:0043234 | 0.0045 | slr1900  | GO:0044262 | 0.0033 | slr1624  | GO:0006790 | 0.0019 |
| sll10298 | GO:0006259 | 0.0087 | slr1082  | GO:0016853 | 0.0058 | slr0581  | GO:0043234 | 0.0045 | slr0192  | GO:0044238 | 0.0033 | sll10788 | GO:0009116 | 0.0019 |
| slr6094  | GO:0006259 | 0.0087 | sll10069 | GO:0046873 | 0.0058 | sll11783 | GO:0043234 | 0.0045 | sll10023 | GO:0044238 | 0.0033 | slr0848  | GO:0044238 | 0.0019 |
| slr7071  | GO:0006259 | 0.0087 | slr0169  | GO:0016853 | 0.0058 | slr1907  | GO:0043234 | 0.0045 | sll10237 | GO:0044238 | 0.0033 | sll11340 | GO:0006790 | 0.0019 |
| slr5111  | GO:0006259 | 0.0087 | slr0053  | GO:0016853 | 0.0058 | ssr6048  | GO:0043234 | 0.0045 | slr0770  | GO:0044238 | 0.0033 | sll10208 | GO:0016051 | 0.0019 |
| sll1926  | GO:0006259 | 0.0087 | ssr0109  | GO:0046873 | 0.0058 | slr1462  | GO:0043234 | 0.0045 | slr1437  | GO:0044238 | 0.0033 | sll17086 | GO:0006790 | 0.0019 |
| slr0039  | GO:0006259 | 0.0087 | ssl13549 | GO:0046873 | 0.0058 | slr5116  | GO:0043234 | 0.0045 | slr1612  | GO:0044262 | 0.0033 | ssr1528  | GO:0006725 | 0.0019 |
| slr0291  | GO:0006259 | 0.0087 | sll10141 | GO:0016853 | 0.0058 | sll11063 | GO:0043234 | 0.0045 | slr1638  | GO:0044238 | 0.0033 | sll10737 | GO:0006725 | 0.0019 |
| sll17055 | GO:0006259 | 0.0087 | slr0731  | GO:0046873 | 0.0058 | sll10423 | GO:0043234 | 0.0045 | slr1073  | GO:0044238 | 0.0033 | slr1875  | GO:0006790 | 0.0019 |
| sll10765 | GO:0006259 | 0.0087 | sll17065 | GO:0016853 | 0.0058 | slr6080  | GO:0043234 | 0.0045 | ssr2439  | GO:0044238 | 0.0033 | ssr7093  | GO:0006790 | 0.0019 |
| sll11763 | GO:0016820 | 0.0087 | slr1852  | GO:0016853 | 0.0058 | slr7096  | GO:0043234 | 0.0045 | slr0023  | GO:0044238 | 0.0033 | slr0980  | GO:0005216 | 0.0019 |
| ssl10750 | GO:0016820 | 0.0087 | slr0654  | GO:0016853 | 0.0058 | slr6074  | GO:0043234 | 0.0045 | sll10735 | GO:0008299 | 0.0033 | slr1032  | GO:0005216 | 0.0019 |
| slr1235  | GO:0016820 | 0.0087 | ssr6027  | GO:0046873 | 0.0058 | ssr2912  | GO:0043234 | 0.0045 | slr0913  | GO:0044238 | 0.0033 | sll11912 | GO:0005216 | 0.0019 |
| ssr2142  | GO:0016740 | 0.0087 | slr0459  | GO:0046873 | 0.0058 | slr1753  | GO:0043234 | 0.0045 | ssr2615  | GO:0044238 | 0.0033 | slr0919  | GO:0005216 | 0.0019 |
| sll10985 | GO:0004871 | 0.0087 | slr1236  | GO:0046873 | 0.0058 | sll10406 | GO:0043234 | 0.0045 | slr0103  | GO:0044238 | 0.0033 | sll10238 | GO:0005216 | 0.0019 |
| sll11293 | GO:0016820 | 0.0087 | sll11192 | GO:0046873 | 0.0058 | sll17043 | GO:0043234 | 0.0045 | ssr1375  | GO:0044262 | 0.0033 | sll10647 | GO:0005216 | 0.0019 |
| slr1811  | GO:0007154 | 0.0086 | slr0300  | GO:0046873 | 0.0058 | sll11062 | GO:0043234 | 0.0045 | slr1081  | GO:0044238 | 0.0033 | sll10071 | GO:0005216 | 0.0019 |
| slr0909  | GO:0007154 | 0.0086 | slr2027  | GO:0046873 | 0.0058 | slr1535  | GO:0043234 | 0.0045 | slr1854  | GO:0044238 | 0.0033 | sll10269 | GO:0005216 | 0.0019 |
| sll10175 | GO:0007154 | 0.0086 | ssl18028 | GO:0046873 | 0.0058 | sll11355 | GO:0043234 | 0.0045 | slr1917  | GO:0044262 | 0.0033 | ssr1258  | GO:0005216 | 0.0019 |
| slr1444  | GO:0007154 | 0.0086 | sll17087 | GO:0046873 | 0.0058 | slr5017  | GO:0043234 | 0.0045 | sll10243 | GO:0044238 | 0.0033 | sll10272 | GO:0005216 | 0.0019 |

|         |            |        |         |            |        |         |            |        |         |            |        |         |            |        |
|---------|------------|--------|---------|------------|--------|---------|------------|--------|---------|------------|--------|---------|------------|--------|
| s110361 | GO:0007154 | 0.0086 | s110249 | GO:0046873 | 0.0058 | s1r0058 | GO:0043234 | 0.0045 | s1r0404 | GO:0044238 | 0.0033 | s112007 | GO:0006730 | 0.0018 |
| s1r1851 | GO:0007154 | 0.0086 | s1r0789 | GO:0016853 | 0.0058 | ssr5117 | GO:0043234 | 0.0045 | s1r1353 | GO:0044262 | 0.0033 | ssr8047 | GO:0009116 | 0.0018 |
| s111751 | GO:0007154 | 0.0086 | s111191 | GO:0046873 | 0.0058 | s116054 | GO:0043234 | 0.0045 | s110864 | GO:0044262 | 0.0033 | s1r1169 | GO:0009116 | 0.0018 |
| s110192 | GO:0007154 | 0.0086 | s110539 | GO:0016853 | 0.0058 | s1r0356 | GO:0043234 | 0.0045 | s1r1778 | GO:0044238 | 0.0033 | s1r2084 | GO:0006725 | 0.0018 |
| s110577 | GO:0007154 | 0.0086 | s118012 | GO:0046873 | 0.0058 | ss12781 | GO:0043234 | 0.0045 | s1r0108 | GO:0008299 | 0.0033 | s1r0656 | GO:0009116 | 0.0018 |
| ssr2422 | GO:0016810 | 0.0086 | s118027 | GO:0046873 | 0.0058 | s1r0655 | GO:0043234 | 0.0045 | s110301 | GO:0044262 | 0.0033 | s1r0771 | GO:0009116 | 0.0018 |
| s1r1611 | GO:0016810 | 0.0086 | s1r0345 | GO:0046873 | 0.0058 | s1r0635 | GO:0043234 | 0.0045 | s110424 | GO:0044262 | 0.0033 | s1r0453 | GO:0009116 | 0.0018 |
| ssr3410 | GO:0016810 | 0.0086 | s1r1895 | GO:0016853 | 0.0058 | ss17046 | GO:0043234 | 0.0045 | s111586 | GO:0044262 | 0.0033 | s1r0651 | GO:0009116 | 0.0018 |
| s1r0398 | GO:0016810 | 0.0086 | ssr6062 | GO:0046873 | 0.0058 | s1r1183 | GO:0043234 | 0.0045 | s1r2144 | GO:0044238 | 0.0033 | ssr7084 | GO:0009116 | 0.0018 |
| s110008 | GO:0016810 | 0.0086 | s1r0582 | GO:0046873 | 0.0058 | s111797 | GO:0043234 | 0.0045 | ssr2551 | GO:0044238 | 0.0033 | s111119 | GO:0006725 | 0.0018 |
| s111378 | GO:0016810 | 0.0086 | ss16092 | GO:0046873 | 0.0058 | s111866 | GO:0043234 | 0.0045 | s1r1591 | GO:0042626 | 0.0033 | s1r6044 | GO:0009116 | 0.0018 |
| s1r1472 | GO:0016810 | 0.0086 | s118019 | GO:0046873 | 0.0058 | s1r0393 | GO:0043234 | 0.0045 | s110488 | GO:0016820 | 0.0033 | s110984 | GO:0009116 | 0.0018 |
| ss15045 | GO:0016810 | 0.0086 | s1r0863 | GO:0046873 | 0.0058 | s1r1472 | GO:0043234 | 0.0045 | s110641 | GO:0016820 | 0.0033 | s1r2004 | GO:0009116 | 0.0018 |
| s110487 | GO:0016810 | 0.0086 | s111170 | GO:0016853 | 0.0058 | s111389 | GO:0043234 | 0.0045 | s1r0765 | GO:0042626 | 0.0033 | s1r2125 | GO:0009116 | 0.0018 |
| s111735 | GO:0016810 | 0.0086 | s1r1647 | GO:0016853 | 0.0058 | s1r0869 | GO:0043234 | 0.0045 | s1r1773 | GO:0042626 | 0.0033 | ss17007 | GO:0009116 | 0.0018 |
| s1r7014 | GO:0016810 | 0.0086 | s1r1327 | GO:0046873 | 0.0058 | s1r6031 | GO:0043234 | 0.0045 | s1r0108 | GO:0042626 | 0.0033 | s111749 | GO:0006790 | 0.0018 |
| s1r7098 | GO:0016810 | 0.0086 | s110810 | GO:0016853 | 0.0058 | s1r0362 | GO:0043234 | 0.0045 | s1r1266 | GO:0005976 | 0.0032 | s1r1702 | GO:0006730 | 0.0018 |
| s110751 | GO:0016810 | 0.0086 | ss15114 | GO:0046873 | 0.0058 | s111414 | GO:0043234 | 0.0045 | s110532 | GO:0005976 | 0.0032 | ssr2802 | GO:0009116 | 0.0018 |
| s1r7023 | GO:0016810 | 0.0086 | s110543 | GO:0046873 | 0.0058 | ssr3341 | GO:0043234 | 0.0045 | s1r1913 | GO:0005976 | 0.0032 | s1r1601 | GO:0009116 | 0.0018 |
| s111252 | GO:0016810 | 0.0086 | ssr3300 | GO:0016853 | 0.0058 | s111348 | GO:0043234 | 0.0045 | s1r0103 | GO:0044249 | 0.0032 | s117031 | GO:0009116 | 0.0018 |
| s110406 | GO:0016810 | 0.0086 | ss17048 | GO:0046873 | 0.0058 | ssr0332 | GO:0043234 | 0.0045 | s110381 | GO:0005976 | 0.0032 | s1r1590 | GO:0009116 | 0.0018 |
| s1r1218 | GO:0016810 | 0.0086 | s110625 | GO:0046873 | 0.0058 | ssr6003 | GO:0043234 | 0.0045 | s1r2144 | GO:0044249 | 0.0032 | s110394 | GO:0009116 | 0.0018 |
| s1r1102 | GO:0016810 | 0.0086 | ssr7035 | GO:0046873 | 0.0058 | s110328 | GO:0043234 | 0.0045 | s110359 | GO:0006520 | 0.0032 | ssr2998 | GO:0009116 | 0.0018 |
| s1r1384 | GO:0016810 | 0.0086 | ss12064 | GO:0046873 | 0.0058 | s111691 | GO:0043234 | 0.0045 | s110740 | GO:0006520 | 0.0032 | s1r0962 | GO:0009116 | 0.0018 |
| s1r1958 | GO:0016810 | 0.0086 | s1r1474 | GO:0046873 | 0.0058 | s111880 | GO:0043234 | 0.0045 | s1r0023 | GO:0044249 | 0.0032 | s110588 | GO:0009116 | 0.0018 |
| s110167 | GO:0016810 | 0.0086 | s110669 | GO:0016853 | 0.0058 | s111921 | GO:0043234 | 0.0045 | s111399 | GO:0006520 | 0.0032 | ss11378 | GO:0009116 | 0.0018 |
| s1r1956 | GO:0016810 | 0.0086 | s1r0238 | GO:0046873 | 0.0058 | s1r1652 | GO:0043234 | 0.0045 | s1r0519 | GO:0044249 | 0.0032 | ss18008 | GO:0009116 | 0.0018 |
| ss11498 | GO:0016810 | 0.0086 | s110101 | GO:0046873 | 0.0058 | ssr0102 | GO:0043234 | 0.0045 | s111344 | GO:0006520 | 0.0032 | s1r1383 | GO:0009116 | 0.0018 |
| s1r1342 | GO:0016810 | 0.0086 | s111344 | GO:0016853 | 0.0058 | s1r1103 | GO:0043234 | 0.0045 | s1r0941 | GO:0005976 | 0.0032 | s1r1762 | GO:0009116 | 0.0018 |
| s110397 | GO:0016810 | 0.0086 | s1r1413 | GO:0016853 | 0.0058 | ss13379 | GO:0043234 | 0.0045 | s1r1862 | GO:0006520 | 0.0032 | s1r0317 | GO:0006725 | 0.0018 |
| s1r1207 | GO:0016810 | 0.0086 | s110230 | GO:0046873 | 0.0058 | s1r1547 | GO:0043234 | 0.0045 | s111830 | GO:0044249 | 0.0032 | s1r0458 | GO:0009116 | 0.0018 |
| s1r1365 | GO:0016810 | 0.0086 | s1r0109 | GO:0046873 | 0.0058 | s111757 | GO:0043234 | 0.0045 | s1r1383 | GO:0006520 | 0.0032 | s110837 | GO:0009116 | 0.0018 |
| s1r1407 | GO:0016810 | 0.0086 | s111834 | GO:0046873 | 0.0058 | s1r6066 | GO:0043234 | 0.0045 | s1r0605 | GO:0006520 | 0.0032 | s1r0613 | GO:0009116 | 0.0018 |
| s1r1178 | GO:0016810 | 0.0086 | s110939 | GO:0046873 | 0.0058 | s110048 | GO:0043234 | 0.0045 | s111675 | GO:0005976 | 0.0032 | s111495 | GO:0009116 | 0.0018 |
| s111651 | GO:0016810 | 0.0086 | s1r0416 | GO:0046873 | 0.0058 | s1r1419 | GO:0043234 | 0.0045 | s111752 | GO:0006520 | 0.0032 | s111505 | GO:0009116 | 0.0018 |
| s1r1957 | GO:0016810 | 0.0086 | s1r1780 | GO:0046873 | 0.0058 | s1r7037 | GO:0043234 | 0.0045 | s1r0586 | GO:0005976 | 0.0032 | s111089 | GO:0009116 | 0.0018 |
| s1r7096 | GO:0016810 | 0.0086 | s111654 | GO:0016853 | 0.0058 | s110436 | GO:0043234 | 0.0045 | s110456 | GO:0044249 | 0.0032 | s1r6029 | GO:0009116 | 0.0018 |
| s111783 | GO:0016810 | 0.0086 | s115003 | GO:0046873 | 0.0058 | s1r6101 | GO:0043234 | 0.0045 | s1r2121 | GO:0044249 | 0.0032 | s1r0975 | GO:0009116 | 0.0018 |
| ssr6032 | GO:0016810 | 0.0086 | s110997 | GO:0016853 | 0.0058 | s111203 | GO:0043234 | 0.0045 | ssr2439 | GO:0044249 | 0.0032 | s1r0699 | GO:0009116 | 0.0018 |
| s1r7080 | GO:0016810 | 0.0086 | s110376 | GO:0046873 | 0.0058 | ss10312 | GO:0043234 | 0.0045 | s1r1210 | GO:0005976 | 0.0032 | s111698 | GO:0009116 | 0.0018 |
| s117047 | GO:0016810 | 0.0086 | s1r0656 | GO:0046873 | 0.0058 | ssr7036 | GO:0043234 | 0.0045 | s1r1699 | GO:0006950 | 0.0032 | s110310 | GO:0006790 | 0.0018 |
| s1r0195 | GO:0016810 | 0.0086 | s111495 | GO:0046873 | 0.0058 | s115032 | GO:0043234 | 0.0045 | s1r7024 | GO:0006520 | 0.0032 | ss10788 | GO:0009116 | 0.0018 |
| s1r2119 | GO:0016810 | 0.0086 | s111915 | GO:0046873 | 0.0058 | s110265 | GO:0043234 | 0.0045 | s111315 | GO:0044249 | 0.0032 | ssr2972 | GO:0009116 | 0.0018 |
| s111232 | GO:0016810 | 0.0086 | ss11918 | GO:0046873 | 0.0058 | s1r1207 | GO:0043234 | 0.0045 | ssr1552 | GO:0006520 | 0.0032 | s1r1670 | GO:0009116 | 0.0018 |
| s1r1470 | GO:0016810 | 0.0086 | s111726 | GO:0046873 | 0.0058 | s117066 | GO:0043234 | 0.0045 | s111659 | GO:0006520 | 0.0032 | ssr2201 | GO:0006725 | 0.0018 |
| s118007 | GO:0016810 | 0.0086 | s111640 | GO:0046873 | 0.0058 | s1r0751 | GO:0043234 | 0.0045 | s110325 | GO:0044249 | 0.0032 | s111752 | GO:0009116 | 0.0018 |
| s1r7101 | GO:0016810 | 0.0086 | s111541 | GO:0016853 | 0.0058 | s1r7095 | GO:0043234 | 0.0045 | s1r0519 | GO:0005976 | 0.0032 | ss18028 | GO:0009116 | 0.0018 |
| s110241 | GO:0016810 | 0.0086 | s1r7026 | GO:0046873 | 0.0058 | s1r7016 | GO:0043234 | 0.0045 | s111002 | GO:0005976 | 0.0032 | ssr3570 | GO:0009116 | 0.0018 |
| s111510 | GO:0016810 | 0.0086 | s112011 | GO:0046873 | 0.0058 | s115034 | GO:0043234 | 0.0045 | s110931 | GO:0006950 | 0.0032 | s115128 | GO:0009116 | 0.0018 |
| s1r2101 | GO:0016810 | 0.0086 | s1r0082 | GO:0046873 | 0.0058 | s110803 | GO:0043234 | 0.0045 | s110645 | GO:0005976 | 0.0032 | s1r0271 | GO:0009116 | 0.0018 |
| s111348 | GO:0016810 | 0.0086 | s1r0149 | GO:0016853 | 0.0058 | s1r0110 | GO:0043234 | 0.0045 | s1r2120 | GO:0006520 | 0.0032 | s110995 | GO:0009116 | 0.0018 |
| s110481 | GO:0016810 | 0.0086 | s1r0271 | GO:0046873 | 0.0058 | s111162 | GO:0043234 | 0.0045 | s1r1431 | GO:0044237 | 0.0032 | s1r1101 | GO:0009116 | 0.0018 |
| s110478 | GO:0016810 | 0.0086 | s1r1128 | GO:0016853 | 0.0058 | s1r1276 | GO:0043234 | 0.0045 | s1r0586 | GO:0044249 | 0.0032 | s110980 | GO:0009116 | 0.0018 |
| s110867 | GO:0016810 | 0.0086 | s1r6106 | GO:0046873 | 0.0058 | s110063 | GO:0043234 | 0.0045 | s110319 | GO:0006520 | 0.0032 | s1r7071 | GO:0009116 | 0.0018 |



|         |            |        |         |            |        |         |            |        |         |            |        |         |            |        |
|---------|------------|--------|---------|------------|--------|---------|------------|--------|---------|------------|--------|---------|------------|--------|
| slr7016 | G0:0016810 | 0.0086 | s110925 | G0:0046873 | 0.0058 | slr1958 | G0:0043234 | 0.0045 | ss18008 | G0:0006520 | 0.0032 | ss11552 | G0:0009116 | 0.0018 |
| ss10312 | G0:0016810 | 0.0086 | slr1827 | G0:0016853 | 0.0058 | slr7014 | G0:0043234 | 0.0045 | slr1573 | G0:0044249 | 0.0032 | slr1449 | G0:0009116 | 0.0018 |
| s115047 | G0:0016810 | 0.0086 | slr1442 | G0:0046873 | 0.0058 | slr0142 | G0:0043234 | 0.0045 | s110297 | G0:0006520 | 0.0032 | slr8021 | G0:0009116 | 0.0018 |
| slr1576 | G0:0016810 | 0.0086 | slr8044 | G0:0046873 | 0.0058 | s111461 | G0:0043234 | 0.0045 | s110785 | G0:0005976 | 0.0032 | ssr1155 | G0:0009116 | 0.0018 |
| s111092 | G0:0016810 | 0.0086 | slr1668 | G0:0016853 | 0.0058 | slr0388 | G0:0043234 | 0.0045 | s110023 | G0:0005976 | 0.0032 | s111191 | G0:0009116 | 0.0018 |
| ss12717 | G0:0016810 | 0.0086 | ssr8047 | G0:0046873 | 0.0058 | s110811 | G0:0043234 | 0.0045 | slr0935 | G0:0006520 | 0.0032 | s117033 | G0:0009116 | 0.0018 |
| s118032 | G0:0016810 | 0.0086 | ssr2553 | G0:0046873 | 0.0058 | slr1546 | G0:0043234 | 0.0045 | slr1778 | G0:0044249 | 0.0032 | slr0232 | G0:0009116 | 0.0018 |
| ssr6085 | G0:0016810 | 0.0086 | ss10788 | G0:0046873 | 0.0058 | s112015 | G0:0043234 | 0.0045 | s110781 | G0:0006520 | 0.0032 | s111267 | G0:0009116 | 0.0018 |
| s111203 | G0:0016810 | 0.0086 | ssr7093 | G0:0046873 | 0.0058 | s110024 | G0:0043234 | 0.0045 | s111239 | G0:0006520 | 0.0032 | slr1911 | G0:0009116 | 0.0018 |
| slr7059 | G0:0016810 | 0.0086 | ss12162 | G0:0046873 | 0.0058 | ssr3189 | G0:0043234 | 0.0045 | s110997 | G0:0006520 | 0.0032 | slr1209 | G0:0009116 | 0.0018 |
| s110872 | G0:0016810 | 0.0086 | ss18039 | G0:0046873 | 0.0058 | slr1851 | G0:0006886 | 0.0044 | slr0386 | G0:0044249 | 0.0032 | s110763 | G0:0006790 | 0.0018 |
| s111696 | G0:0016810 | 0.0086 | slr0285 | G0:0046873 | 0.0058 | slr1047 | G0:0006886 | 0.0044 | s110243 | G0:0005976 | 0.0032 | slr0111 | G0:0009116 | 0.0018 |
| ss12471 | G0:0016810 | 0.0086 | ssr1552 | G0:0016853 | 0.0058 | ss11255 | G0:0006812 | 0.0044 | s111219 | G0:0016829 | 0.0032 | slr2018 | G0:0006790 | 0.0018 |
| slr0065 | G0:0016810 | 0.0086 | s111938 | G0:0016853 | 0.0058 | s110732 | G0:0006886 | 0.0044 | s110513 | G0:0016829 | 0.0032 | s111531 | G0:0009116 | 0.0018 |
| s111691 | G0:0016810 | 0.0086 | slr0060 | G0:0016853 | 0.0058 | s110022 | G0:0006886 | 0.0044 | slr1127 | G0:0016829 | 0.0032 | slr0172 | G0:0009116 | 0.0018 |
| slr0489 | G0:0016810 | 0.0086 | s111891 | G0:0046873 | 0.0058 | slr1098 | G0:0006886 | 0.0044 | slr1023 | G0:0016829 | 0.0032 | s118035 | G0:0009116 | 0.0018 |
| slr7092 | G0:0016810 | 0.0086 | slr6087 | G0:0046873 | 0.0058 | slr1865 | G0:0006886 | 0.0044 | s110743 | G0:0016829 | 0.0032 | s110272 | G0:0006790 | 0.0018 |
| slr1179 | G0:0016810 | 0.0086 | slr1513 | G0:0046873 | 0.0058 | slr1215 | G0:0016820 | 0.0044 | s110360 | G0:0016829 | 0.0032 | slr1114 | G0:0009116 | 0.0018 |
| ssr6079 | G0:0016810 | 0.0086 | slr2117 | G0:0046873 | 0.0058 | slr0935 | G0:0016829 | 0.0043 | s110596 | G0:0016829 | 0.0032 | slr0217 | G0:0009116 | 0.0018 |
| slr0148 | G0:0016810 | 0.0086 | slr0730 | G0:0046873 | 0.0058 | slr0272 | G0:0016829 | 0.0043 | s111218 | G0:0016829 | 0.0032 | slr6103 | G0:0009116 | 0.0018 |
| slr1260 | G0:0016810 | 0.0086 | s111188 | G0:0046873 | 0.0058 | s110980 | G0:0016829 | 0.0043 | slr1800 | G0:0016829 | 0.0032 | s111912 | G0:0006725 | 0.0018 |
| s115062 | G0:0016810 | 0.0086 | slr6051 | G0:0046873 | 0.0058 | slr0680 | G0:0016829 | 0.0043 | s110822 | G0:0016829 | 0.0032 | slr1809 | G0:0009116 | 0.0018 |
| s110659 | G0:0016810 | 0.0086 | s110335 | G0:0046873 | 0.0058 | slr1590 | G0:0016829 | 0.0043 | slr1066 | G0:0016829 | 0.0032 | s111304 | G0:0009116 | 0.0018 |
| s117063 | G0:0016810 | 0.0086 | slr0334 | G0:0046873 | 0.0058 | ssr3300 | G0:0016829 | 0.0043 | s111477 | G0:0016810 | 0.0032 | s111095 | G0:0009116 | 0.0018 |
| slr1261 | G0:0016810 | 0.0086 | s110565 | G0:0046873 | 0.0058 | s111873 | G0:0016829 | 0.0043 | slr1398 | G0:0016829 | 0.0032 | ssr2711 | G0:0009116 | 0.0018 |
| slr0959 | G0:0016810 | 0.0086 | s117050 | G0:0046873 | 0.0058 | s110412 | G0:0016829 | 0.0043 | s110301 | G0:0016829 | 0.0032 | s110405 | G0:0009116 | 0.0018 |
| slr7082 | G0:0016810 | 0.0086 | s111052 | G0:0046873 | 0.0058 | slr0249 | G0:0016829 | 0.0043 | s110615 | G0:0016829 | 0.0032 | s110702 | G0:0006725 | 0.0018 |
| ss15098 | G0:0016810 | 0.0086 | ssr5074 | G0:0046873 | 0.0058 | s111173 | G0:0016829 | 0.0043 | s110910 | G0:0016829 | 0.0032 | s111541 | G0:0009116 | 0.0018 |
| s110609 | G0:0016810 | 0.0086 | slr5087 | G0:0046873 | 0.0058 | s110688 | G0:0016829 | 0.0043 | slr1376 | G0:0016829 | 0.0032 | ssr3467 | G0:0009116 | 0.0018 |
| slr6014 | G0:0016810 | 0.0086 | slr0455 | G0:0016853 | 0.0058 | s110449 | G0:0016829 | 0.0043 | slr1047 | G0:0016829 | 0.0032 | slr1062 | G0:0009116 | 0.0018 |
| s110436 | G0:0016810 | 0.0086 | slr0771 | G0:0046873 | 0.0058 | s110359 | G0:0016829 | 0.0043 | s111222 | G0:0016810 | 0.0032 | slr1288 | G0:0009116 | 0.0018 |
| slr0146 | G0:0016810 | 0.0086 | slr1240 | G0:0016853 | 0.0058 | slr0554 | G0:0016829 | 0.0043 | slr0551 | G0:0016829 | 0.0032 | slr2110 | G0:0009116 | 0.0018 |
| sg10002 | G0:0016810 | 0.0086 | s111956 | G0:0016853 | 0.0058 | s111541 | G0:0016829 | 0.0043 | s110499 | G0:0016829 | 0.0032 | ssr8013 | G0:0009116 | 0.0018 |
| slr0092 | G0:0016810 | 0.0086 | s111131 | G0:0046873 | 0.0058 | s111267 | G0:0016829 | 0.0043 | slr0476 | G0:0016829 | 0.0032 | s110071 | G0:0006790 | 0.0018 |
| slr8014 | G0:0016810 | 0.0086 | ss13382 | G0:0016853 | 0.0058 | slr0456 | G0:0016829 | 0.0043 | slr1222 | G0:0016829 | 0.0032 | slr2038 | G0:0006790 | 0.0018 |
| s115026 | G0:0016810 | 0.0086 | ssr1041 | G0:0046873 | 0.0058 | ssr1552 | G0:0016829 | 0.0043 | s111542 | G0:0016829 | 0.0032 | s111142 | G0:0009116 | 0.0018 |
| slr0964 | G0:0016810 | 0.0086 | slr1062 | G0:0016853 | 0.0058 | s111938 | G0:0016829 | 0.0043 | slr1533 | G0:0016829 | 0.0032 | s111926 | G0:0009116 | 0.0018 |
| slr6065 | G0:0016810 | 0.0086 | slr1033 | G0:0016853 | 0.0058 | s110911 | G0:0016829 | 0.0043 | s110354 | G0:0016829 | 0.0032 | ssr2049 | G0:0004872 | 0.0018 |
| s111265 | G0:0016810 | 0.0086 | s111021 | G0:0016853 | 0.0058 | s111071 | G0:0016829 | 0.0043 | slr0250 | G0:0016829 | 0.0032 | slr1385 | G0:0004872 | 0.0018 |
| slr1927 | G0:0016810 | 0.0086 | s111267 | G0:0016853 | 0.0058 | s111582 | G0:0016829 | 0.0043 | ssr1391 | G0:0016829 | 0.0032 | slr1603 | G0:0004872 | 0.0018 |
| s111511 | G0:0016810 | 0.0086 | slr0318 | G0:0016853 | 0.0058 | slr0596 | G0:0016829 | 0.0043 | slr1674 | G0:0016829 | 0.0032 | slr1702 | G0:0005216 | 0.0018 |
| slr1660 | G0:0016810 | 0.0086 | slr1288 | G0:0016853 | 0.0058 | s110588 | G0:0016829 | 0.0043 | ss13692 | G0:0016829 | 0.0032 | slr1023 | G0:0009116 | 0.0017 |
| s116054 | G0:0016810 | 0.0086 | slr0373 | G0:0016853 | 0.0058 | slr1415 | G0:0016829 | 0.0043 | ssr1698 | G0:0016829 | 0.0032 | ss12996 | G0:0044262 | 0.0017 |
| slr5118 | G0:0016810 | 0.0086 | s111763 | G0:0004518 | 0.0058 | s110572 | G0:0016829 | 0.0043 | slr1918 | G0:0016829 | 0.0032 | slr0551 | G0:0016051 | 0.0017 |
| s110102 | G0:0016810 | 0.0086 | slr0815 | G0:0016853 | 0.0058 | slr1852 | G0:0016829 | 0.0043 | slr0765 | G0:0016810 | 0.0032 | s110413 | G0:0006812 | 0.0017 |
| slr1186 | G0:0016810 | 0.0086 | slr0588 | G0:0046873 | 0.0058 | sm10011 | G0:0016829 | 0.0043 | slr1726 | G0:0016829 | 0.0032 | s110192 | G0:0044262 | 0.0017 |
| s111217 | G0:0016810 | 0.0086 | slr0358 | G0:0016853 | 0.0058 | slr2125 | G0:0016829 | 0.0043 | slr1417 | G0:0016829 | 0.0032 | slr5024 | G0:0044262 | 0.0017 |
| ss15007 | G0:0016810 | 0.0086 | s110172 | G0:0046873 | 0.0058 | slr1541 | G0:0016829 | 0.0043 | s111426 | G0:0016829 | 0.0032 | s110263 | G0:0016051 | 0.0017 |
| s110369 | G0:0016810 | 0.0086 | slr1670 | G0:0046873 | 0.0058 | slr1209 | G0:0016829 | 0.0043 | slr1098 | G0:0016829 | 0.0032 | slr0521 | G0:0044262 | 0.0017 |
| s111160 | G0:0016810 | 0.0086 | ssr2975 | G0:0046873 | 0.0058 | s110268 | G0:0016829 | 0.0043 | s110586 | G0:0016829 | 0.0032 | slr0491 | G0:0044238 | 0.0017 |
| s115006 | G0:0008299 | 0.0085 | ssr0336 | G0:0046873 | 0.0058 | slr1413 | G0:0016829 | 0.0043 | slr0423 | G0:0016829 | 0.0032 | s111671 | G0:0016051 | 0.0017 |
| s110763 | G0:0006139 | 0.0085 | ss10294 | G0:0004518 | 0.0058 | slr0318 | G0:0016829 | 0.0043 | s110732 | G0:0016829 | 0.0032 | slr0948 | G0:0044262 | 0.0017 |
| slr0907 | G0:0008299 | 0.0085 | slr0613 | G0:0046873 | 0.0058 | slr0112 | G0:0016829 | 0.0043 | ssr3532 | G0:0016829 | 0.0032 | slr1702 | G0:0044238 | 0.0017 |
| s111884 | G0:0008299 | 0.0085 | s115028 | G0:0046873 | 0.0058 | slr0053 | G0:0016829 | 0.0043 | s110382 | G0:0016829 | 0.0032 | slr0810 | G0:0044238 | 0.0017 |

|          |            |        |          |            |        |          |            |        |          |            |        |          |            |        |
|----------|------------|--------|----------|------------|--------|----------|------------|--------|----------|------------|--------|----------|------------|--------|
| slr1788  | GO:0006812 | 0.0085 | sll10909 | GO:0016853 | 0.0058 | sll11411 | GO:0016829 | 0.0043 | slr1045  | GO:0016829 | 0.0032 | sll11166 | GO:0016051 | 0.0017 |
| sll10238 | GO:0006139 | 0.0085 | sll10160 | GO:0046873 | 0.0058 | sll10225 | GO:0016829 | 0.0043 | slr1110  | GO:0016853 | 0.0031 | slr6081  | GO:0044262 | 0.0017 |
| sll10524 | GO:0006812 | 0.0085 | sll11072 | GO:0016853 | 0.0058 | slr1383  | GO:0016829 | 0.0043 | slr0341  | GO:0016788 | 0.0031 | slr0479  | GO:0044262 | 0.0017 |
| sll11022 | GO:0008299 | 0.0085 | slr0575  | GO:0046873 | 0.0058 | sll18035 | GO:0006520 | 0.0041 | slr1565  | GO:0016853 | 0.0031 | slr1819  | GO:0044262 | 0.0017 |
| sll10532 | GO:0006812 | 0.0085 | sll10787 | GO:0016853 | 0.0058 | slr7060  | GO:0006520 | 0.0041 | ssr2049  | GO:0016788 | 0.0031 | slr0305  | GO:0009116 | 0.0017 |
| slr2119  | GO:0008299 | 0.0085 | ssl5068  | GO:0046873 | 0.0058 | sll11307 | GO:0006520 | 0.0041 | slr0317  | GO:0016853 | 0.0031 | sll10596 | GO:0016051 | 0.0017 |
| ssl5007  | GO:0008299 | 0.0085 | slr5037  | GO:0046873 | 0.0058 | sll10062 | GO:0006520 | 0.0041 | slr0579  | GO:0016853 | 0.0031 | slr1034  | GO:0016051 | 0.0017 |
| ssr2803  | GO:0006139 | 0.0085 | slr0670  | GO:0046873 | 0.0058 | slr0326  | GO:0006520 | 0.0041 | sll11749 | GO:0016853 | 0.0031 | sll11381 | GO:0044262 | 0.0017 |
| sll10658 | GO:0008299 | 0.0085 | slr6103  | GO:0046873 | 0.0058 | ssr6089  | GO:0006520 | 0.0041 | sll10071 | GO:0016853 | 0.0031 | sll11426 | GO:0016051 | 0.0017 |
| sll18004 | GO:0008299 | 0.0085 | slr1394  | GO:0046873 | 0.0058 | sll10327 | GO:0006520 | 0.0041 | sll10103 | GO:0016853 | 0.0031 | slr1799  | GO:0016051 | 0.0017 |
| sll10886 | GO:0008299 | 0.0085 | slr1101  | GO:0046873 | 0.0058 | sll11158 | GO:0006520 | 0.0041 | slr0442  | GO:0016853 | 0.0031 | ssr3129  | GO:0044262 | 0.0017 |
| sll10456 | GO:0006812 | 0.0085 | slr2012  | GO:0046873 | 0.0058 | sll10286 | GO:0006886 | 0.0041 | ssr2803  | GO:0016853 | 0.0031 | slr1926  | GO:0044262 | 0.0017 |
| sll10518 | GO:0008299 | 0.0085 | sll11660 | GO:0016853 | 0.0058 | slr6094  | GO:0006520 | 0.0041 | slr0919  | GO:0016853 | 0.0031 | ss15064  | GO:0044262 | 0.0017 |
| sll10702 | GO:0006139 | 0.0085 | slr0590  | GO:0046873 | 0.0058 | sll10565 | GO:0006520 | 0.0041 | slr1603  | GO:0016788 | 0.0031 | slr0243  | GO:0016051 | 0.0017 |
| ssl1792  | GO:0008299 | 0.0085 | slr1209  | GO:0016853 | 0.0058 | ssl2064  | GO:0006520 | 0.0041 | slr1429  | GO:0005976 | 0.003  | sll10743 | GO:0009116 | 0.0017 |
| sll10071 | GO:0006139 | 0.0085 | slr1053  | GO:0016853 | 0.0058 | slr6012  | GO:0006520 | 0.0041 | slr1270  | GO:0005976 | 0.003  | slr0299  | GO:0009116 | 0.0017 |
| sll11232 | GO:0008299 | 0.0085 | slr1087  | GO:0046873 | 0.0058 | slr1570  | GO:0006520 | 0.0041 | slr1169  | GO:0006730 | 0.003  | slr0250  | GO:0009116 | 0.0017 |
| sll10913 | GO:0008299 | 0.0085 | sll11714 | GO:0046873 | 0.0058 | ssr5074  | GO:0006520 | 0.0041 | slr1468  | GO:0005976 | 0.003  | sll10625 | GO:0044262 | 0.0017 |
| ssr2611  | GO:0008299 | 0.0085 | slr5024  | GO:0046873 | 0.0058 | slr0709  | GO:0006520 | 0.0041 | slr1340  | GO:0005976 | 0.003  | slr1990  | GO:0044262 | 0.0017 |
| slr0941  | GO:0006812 | 0.0085 | slr7057  | GO:0046873 | 0.0058 | slr1790  | GO:0006520 | 0.0041 | sll10451 | GO:0006730 | 0.003  | sll11913 | GO:0016051 | 0.0017 |
| sll10853 | GO:0008299 | 0.0085 | sll10685 | GO:0016853 | 0.0058 | slr0919  | GO:0006886 | 0.0041 | ss10461  | GO:0005976 | 0.003  | sll11060 | GO:0009116 | 0.0017 |
| ssr7072  | GO:0008299 | 0.0085 | sll11950 | GO:0016853 | 0.0058 | slr0423  | GO:0006730 | 0.0041 | sll11072 | GO:0006730 | 0.003  | slr1052  | GO:0006139 | 0.0017 |
| ssr3409  | GO:0008299 | 0.0085 | slr6029  | GO:0046873 | 0.0058 | slr2027  | GO:0006520 | 0.0041 | ssl2148  | GO:0005976 | 0.003  | sll11319 | GO:0044262 | 0.0017 |
| sll11965 | GO:0006812 | 0.0085 | slr1544  | GO:0016853 | 0.0058 | sll11131 | GO:0006520 | 0.0041 | slr0172  | GO:0006730 | 0.003  | ssr5121  | GO:0044262 | 0.0017 |
| slr0655  | GO:0008299 | 0.0085 | ssr1768  | GO:0046873 | 0.0058 | slr1896  | GO:0006730 | 0.0041 | sll11225 | GO:0006730 | 0.003  | sll11692 | GO:0044262 | 0.0017 |
| sll10487 | GO:0008299 | 0.0085 | slr0712  | GO:0046873 | 0.0058 | ssr2848  | GO:0006730 | 0.0041 | slr5021  | GO:0005976 | 0.003  | slr1780  | GO:0044262 | 0.0017 |
| slr7097  | GO:0008299 | 0.0085 | ssl6061  | GO:0046873 | 0.0058 | sll11233 | GO:0006520 | 0.0041 | ss10787  | GO:0005976 | 0.003  | ssr2972  | GO:0044262 | 0.0017 |
| slr6047  | GO:0008299 | 0.0085 | sll11173 | GO:0016853 | 0.0058 | sll10249 | GO:0006520 | 0.0041 | sll11163 | GO:0005976 | 0.003  | slr0609  | GO:0044262 | 0.0017 |
| sll11830 | GO:0006812 | 0.0085 | slr1425  | GO:0046873 | 0.0058 | ssl7074  | GO:0006520 | 0.0041 | sll11752 | GO:0006730 | 0.003  | sll10296 | GO:0009116 | 0.0017 |
| sll15130 | GO:0008299 | 0.0085 | ssl2971  | GO:0046873 | 0.0058 | slr0521  | GO:0006520 | 0.0041 | ssl1923  | GO:0005976 | 0.003  | sll11321 | GO:0044262 | 0.0017 |
| sll11902 | GO:0006139 | 0.0085 | sll11201 | GO:0016853 | 0.0058 | sll10793 | GO:0006520 | 0.0041 | sll11400 | GO:0005976 | 0.003  | ssr8047  | GO:0044262 | 0.0017 |
| slr0400  | GO:0008299 | 0.0085 | slr1122  | GO:0016853 | 0.0058 | slr1376  | GO:0006730 | 0.0041 | ssr2554  | GO:0005976 | 0.003  | sll11247 | GO:0009116 | 0.0017 |
| slr1676  | GO:0006812 | 0.0085 | ssr1558  | GO:0046873 | 0.0058 | sll17030 | GO:0006520 | 0.0041 | slr1484  | GO:0005976 | 0.003  | slr1601  | GO:0044262 | 0.0017 |
| slr0598  | GO:0008299 | 0.0085 | slr0812  | GO:0046873 | 0.0058 | slr2025  | GO:0006730 | 0.0041 | ssr3341  | GO:0005976 | 0.003  | sll10354 | GO:0009116 | 0.0017 |
| slr0592  | GO:0008299 | 0.0085 | sll11089 | GO:0046873 | 0.0058 | slr0948  | GO:0006520 | 0.0041 | sll11715 | GO:0005976 | 0.003  | slr1519  | GO:0016051 | 0.0017 |
| slr1566  | GO:0008299 | 0.0085 | ssl0483  | GO:0016853 | 0.0058 | sll10069 | GO:0006520 | 0.0041 | sll11414 | GO:0005976 | 0.003  | ssl6035  | GO:0044262 | 0.0017 |
| slr0196  | GO:0008299 | 0.0085 | sll17090 | GO:0046873 | 0.0058 | slr2003  | GO:0006520 | 0.0041 | sll10735 | GO:0006812 | 0.003  | sll11542 | GO:0016051 | 0.0017 |
| slr1275  | GO:0006812 | 0.0085 | sll10297 | GO:0016853 | 0.0058 | slr0582  | GO:0006520 | 0.0041 | sll11902 | GO:0006730 | 0.003  | sll11174 | GO:0009116 | 0.0017 |
| slr7101  | GO:0008299 | 0.0085 | sll11573 | GO:0046873 | 0.0058 | slr1442  | GO:0006520 | 0.0041 | slr0112  | GO:0006730 | 0.003  | slr1114  | GO:0044262 | 0.0017 |
| sll11485 | GO:0008299 | 0.0085 | sll11784 | GO:0046873 | 0.0058 | slr0498  | GO:0006520 | 0.0041 | slr1071  | GO:0006730 | 0.003  | ssr3532  | GO:0016051 | 0.0017 |
| slr0579  | GO:0006139 | 0.0085 | sll11340 | GO:0046873 | 0.0058 | ssr6099  | GO:0006520 | 0.0041 | slr1677  | GO:0005976 | 0.003  | slr1603  | GO:0044238 | 0.0017 |
| slr6090  | GO:0008299 | 0.0085 | sll11830 | GO:0006886 | 0.0057 | ssl0109  | GO:0006730 | 0.0041 | slr1533  | GO:0005976 | 0.003  | slr0287  | GO:0016051 | 0.0017 |
| sll17064 | GO:0008299 | 0.0085 | slr1573  | GO:0006886 | 0.0057 | slr6104  | GO:0006520 | 0.0041 | slr0250  | GO:0005976 | 0.003  | ssr2848  | GO:0016051 | 0.0017 |
| sll11761 | GO:0006812 | 0.0085 | sll10456 | GO:0006886 | 0.0057 | slr0285  | GO:0006520 | 0.0041 | slr0765  | GO:0006812 | 0.003  | ssl0353  | GO:0044262 | 0.0017 |
| slr1150  | GO:0008299 | 0.0085 | ssr2551  | GO:0006886 | 0.0057 | sll10269 | GO:0006886 | 0.0041 | slr1223  | GO:0005976 | 0.003  | ssr7035  | GO:0044262 | 0.0017 |
| slr1576  | GO:0008299 | 0.0085 | ssr3532  | GO:0008299 | 0.0057 | slr0755  | GO:0006520 | 0.0041 | slr1034  | GO:0005976 | 0.003  | slr0699  | GO:0044262 | 0.0017 |
| slr1863  | GO:0008299 | 0.0085 | sll10854 | GO:0008299 | 0.0057 | ssl7007  | GO:0006520 | 0.0041 | ssl3291  | GO:0006730 | 0.003  | slr0313  | GO:0044262 | 0.0017 |
| sll10932 | GO:0006139 | 0.0085 | sll11586 | GO:0008299 | 0.0057 | slr1577  | GO:0006520 | 0.0041 | sll10669 | GO:0006730 | 0.003  | slr1444  | GO:0044249 | 0.0017 |
| slr0208  | GO:0006139 | 0.0085 | slr1081  | GO:0006886 | 0.0057 | slr2004  | GO:0006520 | 0.0041 | slr1273  | GO:0005976 | 0.003  | sll17090 | GO:0044262 | 0.0017 |
| slr0103  | GO:0006812 | 0.0085 | slr1222  | GO:0008299 | 0.0057 | slr5053  | GO:0006520 | 0.0041 | slr0146  | GO:0005976 | 0.003  | sll10743 | GO:0016051 | 0.0017 |
| sll10066 | GO:0006812 | 0.0085 | slr0208  | GO:0006812 | 0.0057 | slr6088  | GO:0006520 | 0.0041 | slr6072  | GO:0005976 | 0.003  | sll10335 | GO:0044262 | 0.0017 |
| sll10497 | GO:0006812 | 0.0085 | ssr2755  | GO:0006886 | 0.0057 | slr1623  | GO:0006520 | 0.0041 | sll10508 | GO:0005976 | 0.003  | sll10577 | GO:0044249 | 0.0017 |
| ssr6020  | GO:0008299 | 0.0085 | slr1177  | GO:0006886 | 0.0057 | ssr2802  | GO:0006520 | 0.0041 | sll10513 | GO:0005976 | 0.003  | slr1107  | GO:0016051 | 0.0017 |
| slr1168  | GO:0008299 | 0.0085 | sll11835 | GO:0006886 | 0.0057 | sll17067 | GO:0006520 | 0.0041 | slr1209  | GO:0006730 | 0.003  | slr1449  | GO:0044262 | 0.0017 |

|          |            |        |          |            |        |          |            |        |          |            |        |          |            |        |
|----------|------------|--------|----------|------------|--------|----------|------------|--------|----------|------------|--------|----------|------------|--------|
| slr1753  | GO:0008299 | 0.0085 | sll1472  | GO:0008299 | 0.0057 | ssr0759  | GO:0006520 | 0.0041 | sll0860  | GO:0005976 | 0.003  | sll1219  | GO:0016051 | 0.0017 |
| sll1306  | GO:0008299 | 0.0085 | sll1613  | GO:0006886 | 0.0057 | slr1624  | GO:0006520 | 0.0041 | slr6047  | GO:0005976 | 0.003  | ssr2333  | GO:0044262 | 0.0017 |
| ssr6003  | GO:0008299 | 0.0085 | slr1799  | GO:0008299 | 0.0057 | sll10647 | GO:0006886 | 0.0041 | sll10048 | GO:0005976 | 0.003  | sll10858 | GO:0044262 | 0.0017 |
| ssl1972  | GO:0008299 | 0.0085 | sll10414 | GO:0006886 | 0.0057 | slr0345  | GO:0006520 | 0.0041 | slr0147  | GO:0006812 | 0.003  | sll11858 | GO:0044238 | 0.0017 |
| sll10857 | GO:0008299 | 0.0085 | sll11965 | GO:0006886 | 0.0057 | slr0013  | GO:0006520 | 0.0041 | sll11054 | GO:0006730 | 0.003  | sll10804 | GO:0044238 | 0.0017 |
| slr1429  | GO:0008299 | 0.0085 | sll10743 | GO:0008299 | 0.0057 | sll11106 | GO:0006520 | 0.0041 | sll10827 | GO:0006730 | 0.003  | slr0039  | GO:0044262 | 0.0017 |
| slr1419  | GO:0008299 | 0.0085 | slr1999  | GO:0006886 | 0.0057 | slr6022  | GO:0006520 | 0.0041 | slr0168  | GO:0005976 | 0.003  | slr0780  | GO:0044262 | 0.0017 |
| slr6014  | GO:0008299 | 0.0085 | sll11174 | GO:0008299 | 0.0057 | slr1789  | GO:0006520 | 0.0041 | sll11654 | GO:0006730 | 0.003  | slr2060  | GO:0044262 | 0.0017 |
| ssl13142 | GO:0008299 | 0.0085 | slr1437  | GO:0006886 | 0.0057 | slr0287  | GO:0006730 | 0.0041 | slr1189  | GO:0005976 | 0.003  | slr1206  | GO:0044262 | 0.0017 |
| sll10933 | GO:0005975 | 0.0084 | ssr2615  | GO:0006886 | 0.0057 | ssr1041  | GO:0006520 | 0.0041 | sll11411 | GO:0006730 | 0.003  | sll18011 | GO:0044262 | 0.0017 |
| sll10242 | GO:0005975 | 0.0084 | sll10085 | GO:0006886 | 0.0057 | sll11135 | GO:0006730 | 0.0041 | sll11873 | GO:0006730 | 0.003  | slr7094  | GO:0044262 | 0.0017 |
| slr1648  | GO:0016788 | 0.0084 | slr1932  | GO:0006886 | 0.0057 | ssr0109  | GO:0006520 | 0.0041 | sll11461 | GO:0005976 | 0.003  | slr2027  | GO:0044262 | 0.0017 |
| ssr2755  | GO:0016788 | 0.0084 | ssr1258  | GO:0006812 | 0.0057 | sll15089 | GO:0006520 | 0.0041 | slr0869  | GO:0005976 | 0.003  | sll11380 | GO:0044262 | 0.0017 |
| slr2121  | GO:0016788 | 0.0084 | slr0668  | GO:0006886 | 0.0057 | sll11095 | GO:0006520 | 0.0041 | slr1196  | GO:0005976 | 0.003  | slr1127  | GO:0016051 | 0.0017 |
| slr2011  | GO:0016788 | 0.0084 | sll11426 | GO:0008299 | 0.0057 | slr0291  | GO:0006520 | 0.0041 | sll10443 | GO:0005976 | 0.003  | sll10732 | GO:0044262 | 0.0017 |
| slr0103  | GO:0016788 | 0.0084 | sll10243 | GO:0004872 | 0.0057 | ssr1425  | GO:0006520 | 0.0041 | sll11472 | GO:0005976 | 0.003  | slr0157  | GO:0016051 | 0.0017 |
| slr0204  | GO:0016788 | 0.0084 | sll11530 | GO:0004872 | 0.0057 | slr1441  | GO:0006730 | 0.0041 | ssr6048  | GO:0005976 | 0.003  | slr2052  | GO:0044262 | 0.0017 |
| sll10243 | GO:0016788 | 0.0084 | slr1230  | GO:0004872 | 0.0057 | sll11714 | GO:0006520 | 0.0041 | sll11485 | GO:0005976 | 0.003  | slr0109  | GO:0044262 | 0.0017 |
| sll10381 | GO:0016788 | 0.0084 | slr1880  | GO:0004872 | 0.0057 | sll11692 | GO:0006520 | 0.0041 | slr7082  | GO:0005976 | 0.003  | slr6106  | GO:0044262 | 0.0017 |
| slr0482  | GO:0016788 | 0.0084 | slr0404  | GO:0004872 | 0.0057 | slr1056  | GO:0006520 | 0.0041 | sll15006 | GO:0005976 | 0.003  | slr0416  | GO:0044262 | 0.0017 |
| slr1437  | GO:0016788 | 0.0084 | slr0586  | GO:0004872 | 0.0057 | sll11049 | GO:0006520 | 0.0041 | slr6004  | GO:0005976 | 0.003  | sll10513 | GO:0009116 | 0.0017 |
| slr0921  | GO:0016788 | 0.0084 | sll11563 | GO:0004872 | 0.0057 | slr0238  | GO:0006520 | 0.0041 | sll11173 | GO:0006730 | 0.003  | ssl0467  | GO:0044262 | 0.0017 |
| sll10780 | GO:0016788 | 0.0084 | slr2011  | GO:0004872 | 0.0057 | ssl6035  | GO:0006520 | 0.0041 | slr1762  | GO:0006730 | 0.003  | sll17031 | GO:0044262 | 0.0017 |
| slr1573  | GO:0016788 | 0.0084 | sll10280 | GO:0004872 | 0.0057 | sll10192 | GO:0043169 | 0.0041 | sll10590 | GO:0006730 | 0.003  | sll11526 | GO:0044249 | 0.0017 |
| slr1999  | GO:0016788 | 0.0084 | slr1275  | GO:0004872 | 0.0057 | slr1444  | GO:0016853 | 0.0041 | sll11505 | GO:0006730 | 0.003  | sll11218 | GO:0009116 | 0.0017 |
| sll10355 | GO:0016788 | 0.0084 | sll11315 | GO:0004872 | 0.0057 | sll10183 | GO:0016853 | 0.0041 | sll11186 | GO:0005976 | 0.003  | sll11942 | GO:0016051 | 0.0017 |
| sll10023 | GO:0016788 | 0.0084 | ssl2807  | GO:0004872 | 0.0057 | slr1773  | GO:0008324 | 0.0041 | ssl10750 | GO:0015031 | 0.003  | sll11158 | GO:0044262 | 0.0017 |
| sll10497 | GO:0016788 | 0.0084 | slr1436  | GO:0004872 | 0.0057 | slr1565  | GO:0004872 | 0.0041 | ssr6020  | GO:0005976 | 0.003  | ssl17042 | GO:0044262 | 0.0017 |
| slr1913  | GO:0016788 | 0.0084 | sll10676 | GO:0004872 | 0.0057 | sll10071 | GO:0004872 | 0.0041 | slr1066  | GO:0005976 | 0.003  | sll10931 | GO:0008299 | 0.0017 |
| sll10177 | GO:0016788 | 0.0084 | ssr2551  | GO:0004872 | 0.0057 | sll10192 | GO:0016853 | 0.0041 | slr1470  | GO:0005976 | 0.003  | slr0740  | GO:0044249 | 0.0017 |
| slr1932  | GO:0016788 | 0.0084 | slr1667  | GO:0004872 | 0.0057 | slr0147  | GO:0008324 | 0.0041 | slr6064  | GO:0005976 | 0.003  | ssr6062  | GO:0044262 | 0.0017 |
| ssr2615  | GO:0016788 | 0.0084 | sll10456 | GO:0004872 | 0.0057 | slr2084  | GO:0004872 | 0.0041 | slr1918  | GO:0005976 | 0.003  | ssr3154  | GO:0006629 | 0.0017 |
| slr2073  | GO:0016788 | 0.0084 | sll11965 | GO:0004872 | 0.0057 | slr1110  | GO:0004872 | 0.0041 | sll11022 | GO:0005976 | 0.003  | ssr6083  | GO:0044262 | 0.0017 |
| slr1778  | GO:0016788 | 0.0084 | ssr2787  | GO:0004872 | 0.0057 | slr1495  | GO:0004872 | 0.0041 | slr2125  | GO:0006730 | 0.003  | slr0587  | GO:0044262 | 0.0017 |
| sll10280 | GO:0016788 | 0.0084 | sll10314 | GO:0004872 | 0.0057 | sll11119 | GO:0004872 | 0.0041 | slr1674  | GO:0005976 | 0.003  | sll11891 | GO:0044262 | 0.0017 |
| slr0872  | GO:0016788 | 0.0084 | ssl0750  | GO:0016874 | 0.0057 | ssl3291  | GO:0004872 | 0.0041 | slr6073  | GO:0005976 | 0.003  | slr0514  | GO:0044262 | 0.0017 |
| ssr1765  | GO:0016788 | 0.0084 | sll11658 | GO:0004872 | 0.0057 | ssr0692  | GO:0008324 | 0.0041 | slr0554  | GO:0006730 | 0.003  | ssr1256  | GO:0005976 | 0.0017 |
| sll10216 | GO:0016788 | 0.0084 | slr1618  | GO:0004872 | 0.0057 | sll11526 | GO:0016853 | 0.0041 | sll11350 | GO:0006730 | 0.003  | slr1047  | GO:0044249 | 0.0017 |
| slr1571  | GO:0016788 | 0.0084 | slr0348  | GO:0004872 | 0.0057 | slr1767  | GO:0043169 | 0.0041 | slr0919  | GO:0006730 | 0.003  | sll17087 | GO:0044262 | 0.0017 |
| slr1854  | GO:0016788 | 0.0084 | sll10007 | GO:0004872 | 0.0057 | slr0919  | GO:0004872 | 0.0041 | sll11426 | GO:0005976 | 0.003  | ssl10109 | GO:0016051 | 0.0017 |
| slr0519  | GO:0016788 | 0.0084 | slr0770  | GO:0004872 | 0.0057 | sll11526 | GO:0043169 | 0.0041 | sll11526 | GO:0006730 | 0.0029 | sll10413 | GO:0006139 | 0.0017 |
| sll11563 | GO:0016788 | 0.0084 | sll11086 | GO:0004872 | 0.0057 | sll11222 | GO:0008324 | 0.0041 | slr1098  | GO:0006730 | 0.0029 | ssl2384  | GO:0044262 | 0.0017 |
| sll1262  | GO:0016788 | 0.0084 | sll10414 | GO:0004872 | 0.0057 | sll10788 | GO:0016853 | 0.0041 | slr1143  | GO:0006730 | 0.0029 | ssr2711  | GO:0044262 | 0.0017 |
| ssr2551  | GO:0016788 | 0.0084 | sll10982 | GO:0004872 | 0.0057 | slr1847  | GO:0016853 | 0.0041 | slr1926  | GO:0006730 | 0.0029 | ssl17021 | GO:0044262 | 0.0017 |
| ssr3122  | GO:0016788 | 0.0084 | slr1638  | GO:0004872 | 0.0057 | slr1726  | GO:0016853 | 0.0041 | slr1307  | GO:0006730 | 0.0029 | sll11586 | GO:0016051 | 0.0017 |
| slr1203  | GO:0016788 | 0.0084 | sll10216 | GO:0004872 | 0.0057 | sll11912 | GO:0004872 | 0.0041 | slr1959  | GO:0006730 | 0.0029 | slr0241  | GO:0044262 | 0.0017 |
| sll11736 | GO:0016788 | 0.0084 | sll11442 | GO:0004872 | 0.0057 | slr0263  | GO:0016853 | 0.0041 | sll10783 | GO:0006730 | 0.0029 | slr1847  | GO:0044262 | 0.0017 |
| sll10414 | GO:0016788 | 0.0084 | sll10944 | GO:0004872 | 0.0057 | sll10577 | GO:0016853 | 0.0041 | slr0602  | GO:0016772 | 0.0029 | slr1935  | GO:0044262 | 0.0017 |
| slr1885  | GO:0016788 | 0.0084 | slr0204  | GO:0004872 | 0.0057 | slr0740  | GO:0016853 | 0.0041 | slr1809  | GO:0016051 | 0.0028 | sll11446 | GO:0006629 | 0.0017 |
| sll11512 | GO:0044267 | 0.0083 | sll17063 | GO:0030001 | 0.0056 | ssl2996  | GO:0043169 | 0.0041 | sll10846 | GO:0006730 | 0.0028 | slr0876  | GO:0016051 | 0.0017 |
| sll10595 | GO:0044267 | 0.0083 | slr1863  | GO:0030001 | 0.0056 | slr0496  | GO:0016853 | 0.0041 | slr1544  | GO:0016051 | 0.0028 | sll10985 | GO:0016772 | 0.0017 |
| slr0104  | GO:0044267 | 0.0083 | slr0211  | GO:0006164 | 0.0056 | sll10732 | GO:0016853 | 0.0041 | slr0358  | GO:0016051 | 0.0028 | sll18007 | GO:0016051 | 0.0016 |
| slr0729  | GO:0044267 | 0.0083 | sll16052 | GO:0006164 | 0.0056 | slr0208  | GO:0004872 | 0.0041 | sll11925 | GO:0016051 | 0.0028 | sll15034 | GO:0016051 | 0.0016 |
| sll10588 | GO:0044267 | 0.0083 | slr1394  | GO:0006164 | 0.0056 | sll10910 | GO:0043169 | 0.0041 | ssr3409  | GO:0006730 | 0.0028 | slr0151  | GO:0016051 | 0.0016 |

|         |            |        |          |            |        |          |            |        |         |            |        |         |            |        |
|---------|------------|--------|----------|------------|--------|----------|------------|--------|---------|------------|--------|---------|------------|--------|
| slr2048 | GO:0044267 | 0.0083 | sl10481  | GO:0030001 | 0.0056 | slr1774  | GO:0008324 | 0.0041 | slr1436 | GO:0016070 | 0.0028 | slr0398 | GO:0016051 | 0.0016 |
| sl10888 | GO:0044267 | 0.0083 | slr0967  | GO:0006164 | 0.0056 | slr1098  | GO:0016853 | 0.0041 | sl10309 | GO:0016070 | 0.0028 | sl10547 | GO:0006725 | 0.0016 |
| sl11634 | GO:0044267 | 0.0083 | sl116054 | GO:0030001 | 0.0056 | slr0607  | GO:0043169 | 0.0041 | sl10982 | GO:0016070 | 0.0028 | sl11109 | GO:0016051 | 0.0016 |
| sl11390 | GO:0044267 | 0.0083 | slr1187  | GO:0006886 | 0.0056 | ssr1114  | GO:0043234 | 0.0041 | sl10590 | GO:0016051 | 0.0028 | sl11477 | GO:0044267 | 0.0016 |
| slr1169 | GO:0044267 | 0.0083 | slr6013  | GO:0030001 | 0.0056 | slr0431  | GO:0043234 | 0.0041 | sl11350 | GO:0016051 | 0.0028 | sl11414 | GO:0016051 | 0.0016 |
| sl10827 | GO:0044267 | 0.0083 | sl11254  | GO:0006164 | 0.0056 | sl10810  | GO:0043234 | 0.0041 | slr0092 | GO:0006730 | 0.0028 | slr0065 | GO:0016051 | 0.0016 |
| sl10843 | GO:0044267 | 0.0083 | sl11109  | GO:0006886 | 0.0056 | sl10281  | GO:0043234 | 0.0041 | slr1288 | GO:0016051 | 0.0028 | slr0870 | GO:0016051 | 0.0016 |
| slr1258 | GO:0044267 | 0.0083 | sl10249  | GO:0006164 | 0.0056 | sl10623  | GO:0043234 | 0.0041 | slr1638 | GO:0016070 | 0.0028 | sl10553 | GO:0016051 | 0.0016 |
| slr1122 | GO:0044267 | 0.0083 | sl10609  | GO:0006886 | 0.0056 | sl11530  | GO:0043234 | 0.0041 | sl10268 | GO:0016051 | 0.0028 | sl11306 | GO:0016051 | 0.0016 |
| slr1544 | GO:0044267 | 0.0083 | slr0871  | GO:0006164 | 0.0056 | sl10832  | GO:0043234 | 0.0041 | slr2111 | GO:0016070 | 0.0028 | sl11401 | GO:0016051 | 0.0016 |
| slr2005 | GO:0044267 | 0.0083 | ssr3570  | GO:0006164 | 0.0056 | slr1240  | GO:0043234 | 0.0041 | slr0104 | GO:0016051 | 0.0028 | sl10283 | GO:0006725 | 0.0016 |
| slr0605 | GO:0044267 | 0.0083 | sl11486  | GO:0006164 | 0.0056 | sl11344  | GO:0043234 | 0.0041 | sl11563 | GO:0016070 | 0.0028 | slr1270 | GO:0016051 | 0.0016 |
| sl10359 | GO:0044267 | 0.0083 | sl117086 | GO:0006164 | 0.0056 | ss1045   | GO:0043234 | 0.0041 | slr0818 | GO:0006164 | 0.0028 | slr7023 | GO:0016051 | 0.0016 |
| sl11752 | GO:0044267 | 0.0083 | slr0937  | GO:0006164 | 0.0056 | slr0207  | GO:0043234 | 0.0041 | sl11002 | GO:0016070 | 0.0028 | slr1110 | GO:0009116 | 0.0016 |
| sl11730 | GO:0044267 | 0.0083 | slr1450  | GO:0006164 | 0.0056 | sl10688  | GO:0043234 | 0.0041 | slr6066 | GO:0006730 | 0.0028 | slr0869 | GO:0016051 | 0.0016 |
| slr2125 | GO:0016810 | 0.0083 | sl11252  | GO:0006886 | 0.0056 | slr1544  | GO:0043234 | 0.0041 | slr0272 | GO:0016051 | 0.0028 | slr1052 | GO:0007154 | 0.0016 |
| slr2048 | GO:0016810 | 0.0083 | sl11092  | GO:0006886 | 0.0056 | sl110147 | GO:0043234 | 0.0041 | slr1188 | GO:0006730 | 0.0028 | sl10702 | GO:0009116 | 0.0016 |
| slr1122 | GO:0016810 | 0.0083 | sl11232  | GO:0006886 | 0.0056 | sl110189 | GO:0043234 | 0.0041 | ssr2009 | GO:0016051 | 0.0028 | sl10867 | GO:0016051 | 0.0016 |
| slr1288 | GO:0016810 | 0.0083 | slr1670  | GO:0006164 | 0.0056 | sl10703  | GO:0043234 | 0.0041 | slr7015 | GO:0006730 | 0.0028 | ssr1951 | GO:0016051 | 0.0016 |
| sl10412 | GO:0016810 | 0.0083 | slr0821  | GO:0006886 | 0.0056 | sl10314  | GO:0043234 | 0.0041 | ssr3300 | GO:0016051 | 0.0028 | ss11792 | GO:0016051 | 0.0016 |
| slr0373 | GO:0016810 | 0.0083 | ssr2611  | GO:0030001 | 0.0056 | slr1664  | GO:0043234 | 0.0041 | slr1940 | GO:0016051 | 0.0028 | sl11400 | GO:0016051 | 0.0016 |
| slr1070 | GO:0016810 | 0.0083 | sl10742  | GO:0030001 | 0.0056 | slr1070  | GO:0043234 | 0.0041 | slr2101 | GO:0006730 | 0.0028 | sl11765 | GO:0016051 | 0.0016 |
| slr1152 | GO:0016810 | 0.0083 | ss17039  | GO:0006164 | 0.0056 | slr0962  | GO:0043234 | 0.0041 | sl10669 | GO:0016051 | 0.0028 | slr1376 | GO:0006725 | 0.0016 |
| slr1895 | GO:0016810 | 0.0083 | sl110397 | GO:0006886 | 0.0056 | ssr3300  | GO:0043234 | 0.0041 | slr0149 | GO:0016051 | 0.0028 | slr6066 | GO:0016051 | 0.0016 |
| slr0654 | GO:0016810 | 0.0083 | slr0948  | GO:0006164 | 0.0056 | slr1638  | GO:0043234 | 0.0041 | sl10911 | GO:0016051 | 0.0028 | sl11863 | GO:0016051 | 0.0016 |
| sl10449 | GO:0016810 | 0.0083 | sl11552  | GO:0006886 | 0.0056 | slr0935  | GO:0043234 | 0.0041 | sl11571 | GO:0006730 | 0.0028 | slr1721 | GO:0016051 | 0.0016 |
| sl11239 | GO:0016810 | 0.0083 | slr1900  | GO:0006164 | 0.0056 | slr0364  | GO:0043234 | 0.0041 | ss12420 | GO:0006730 | 0.0028 | slr1547 | GO:0016051 | 0.0016 |
| slr1647 | GO:0016810 | 0.0083 | slr7023  | GO:0006886 | 0.0056 | slr1932  | GO:0043234 | 0.0041 | ss18003 | GO:0006730 | 0.0028 | ssr2611 | GO:0016051 | 0.0016 |
| sl11950 | GO:0016810 | 0.0083 | slr0695  | GO:0030001 | 0.0056 | ss10739  | GO:0043234 | 0.0041 | sl10810 | GO:0016051 | 0.0028 | sl11853 | GO:0016051 | 0.0016 |
| sl10911 | GO:0016810 | 0.0083 | sl115032 | GO:0006886 | 0.0056 | sl11956  | GO:0043234 | 0.0041 | slr1384 | GO:0006730 | 0.0028 | sl10846 | GO:0016051 | 0.0016 |
| sl11304 | GO:0016810 | 0.0083 | sl110327 | GO:0006164 | 0.0056 | slr0456  | GO:0043234 | 0.0041 | sl11239 | GO:0016051 | 0.0028 | sl11766 | GO:0016051 | 0.0016 |
| sl10156 | GO:0016810 | 0.0083 | slr1183  | GO:0006886 | 0.0056 | slr1658  | GO:0043234 | 0.0041 | sl18004 | GO:0006730 | 0.0028 | slr1097 | GO:0016051 | 0.0016 |
| slr1762 | GO:0016810 | 0.0083 | slr2118  | GO:0030001 | 0.0056 | slr1668  | GO:0043234 | 0.0041 | slr0569 | GO:0006730 | 0.0028 | slr0606 | GO:0016051 | 0.0016 |
| sl11173 | GO:0016810 | 0.0083 | sl10811  | GO:0030001 | 0.0056 | slr1033  | GO:0043234 | 0.0041 | slr1070 | GO:0016051 | 0.0028 | slr2101 | GO:0016051 | 0.0016 |
| sl11240 | GO:0016810 | 0.0083 | slr1187  | GO:0030001 | 0.0056 | sl10997  | GO:0043234 | 0.0041 | sl10189 | GO:0016051 | 0.0028 | slr0695 | GO:0016051 | 0.0016 |
| slr0456 | GO:0016810 | 0.0083 | ss12138  | GO:0006164 | 0.0056 | sl11835  | GO:0043234 | 0.0041 | sl11608 | GO:0016070 | 0.0028 | slr0581 | GO:0016051 | 0.0016 |
| sl10602 | GO:0016810 | 0.0083 | sl10658  | GO:0030001 | 0.0056 | sl10995  | GO:0043234 | 0.0041 | sl10994 | GO:0006730 | 0.0028 | slr6015 | GO:0016051 | 0.0016 |
| sl11071 | GO:0016810 | 0.0083 | slr1990  | GO:0006164 | 0.0056 | slr0383  | GO:0043234 | 0.0041 | sl11509 | GO:0006730 | 0.0028 | sl11511 | GO:0016051 | 0.0016 |
| sl10843 | GO:0016810 | 0.0083 | slr2012  | GO:0006164 | 0.0056 | slr0930  | GO:0043234 | 0.0041 | slr1647 | GO:0016051 | 0.0028 | slr6064 | GO:0016051 | 0.0016 |
| sl10909 | GO:0016810 | 0.0083 | slr0784  | GO:0006886 | 0.0056 | sl10216  | GO:0043234 | 0.0041 | sl10359 | GO:0016051 | 0.0028 | slr1603 | GO:0006790 | 0.0016 |
| sl11350 | GO:0016810 | 0.0083 | slr1449  | GO:0006164 | 0.0056 | ssr1765  | GO:0043234 | 0.0041 | sl11773 | GO:0006730 | 0.0028 | sl10710 | GO:0016051 | 0.0016 |
| ssr1114 | GO:0016810 | 0.0083 | slr1406  | GO:0006164 | 0.0056 | slr1616  | GO:0043234 | 0.0041 | slr1619 | GO:0006730 | 0.0028 | slr7096 | GO:0016051 | 0.0016 |
| slr1074 | GO:0016810 | 0.0083 | slr1173  | GO:0006164 | 0.0056 | sl11072  | GO:0043234 | 0.0041 | sl16054 | GO:0006730 | 0.0028 | sl15026 | GO:0016051 | 0.0016 |
| slr0815 | GO:0016810 | 0.0083 | slr0601  | GO:0030001 | 0.0056 | slr1210  | GO:0043234 | 0.0041 | sl10614 | GO:0016051 | 0.0028 | sl11062 | GO:0016051 | 0.0016 |
| slr0989 | GO:0016810 | 0.0083 | sl11915  | GO:0006164 | 0.0056 | sl11225  | GO:0043234 | 0.0041 | slr1150 | GO:0006730 | 0.0028 | slr1753 | GO:0016051 | 0.0016 |
| slr1082 | GO:0016810 | 0.0083 | ss13692  | GO:0006164 | 0.0056 | slr0586  | GO:0043234 | 0.0041 | sl11960 | GO:0006730 | 0.0028 | sl10473 | GO:0016051 | 0.0016 |
| sl11054 | GO:0016810 | 0.0083 | sl10102  | GO:0030001 | 0.0056 | slr0318  | GO:0043234 | 0.0041 | slr5118 | GO:0006730 | 0.0028 | sl10296 | GO:0006725 | 0.0016 |
| sl10297 | GO:0016810 | 0.0083 | slr6073  | GO:0030001 | 0.0056 | ssr2439  | GO:0043234 | 0.0041 | sl11132 | GO:0006730 | 0.0028 | ss17046 | GO:0016051 | 0.0016 |
| slr1977 | GO:0016810 | 0.0083 | slr1069  | GO:0030001 | 0.0056 | sl10297  | GO:0043234 | 0.0041 | ss13379 | GO:0006730 | 0.0028 | ss10461 | GO:0016051 | 0.0016 |
| sl11660 | GO:0016810 | 0.0083 | slr0907  | GO:0006886 | 0.0056 | slr1209  | GO:0043234 | 0.0041 | sl10423 | GO:0006730 | 0.0028 | slr1045 | GO:0006725 | 0.0016 |
| slr0318 | GO:0016810 | 0.0083 | sl11191  | GO:0006164 | 0.0056 | slr1762  | GO:0043234 | 0.0041 | sl10585 | GO:0016051 | 0.0028 | slr1384 | GO:0016051 | 0.0016 |
| slr0742 | GO:0016810 | 0.0083 | ssr6027  | GO:0006164 | 0.0056 | slr0121  | GO:0043234 | 0.0041 | slr0108 | GO:0006164 | 0.0028 | sl11060 | GO:0006725 | 0.0016 |
| sl11251 | GO:0016810 | 0.0083 | sl11359  | GO:0030001 | 0.0056 | sl10456  | GO:0043234 | 0.0041 | slr1773 | GO:0006164 | 0.0028 | sl10994 | GO:0016051 | 0.0016 |
| slr1603 | GO:0042626 | 0.0081 | slr1599  | GO:0006164 | 0.0056 | sl10780  | GO:0043234 | 0.0041 | slr0146 | GO:0006730 | 0.0028 | slr0317 | GO:0009116 | 0.0016 |

|          |            |        |         |            |        |         |            |        |         |            |        |          |            |        |
|----------|------------|--------|---------|------------|--------|---------|------------|--------|---------|------------|--------|----------|------------|--------|
| ssl1255  | G0:0042626 | 0.0081 | ssr3189 | G0:0030001 | 0.0056 | slr1287 | G0:0043234 | 0.0041 | slr0650 | G0:0016051 | 0.0028 | slr0356  | G0:0016051 | 0.0016 |
| slr2073  | G0:0006629 | 0.008  | ssr6020 | G0:0006886 | 0.0056 | slr0358 | G0:0043234 | 0.0041 | slr5116 | G0:0006730 | 0.0028 | slr0195  | G0:0016051 | 0.0016 |
| slr1437  | G0:0006629 | 0.008  | slr0637 | G0:0006164 | 0.0056 | ssl1707 | G0:0043234 | 0.0041 | sl11765 | G0:0006730 | 0.0028 | sl15046  | G0:0016051 | 0.0016 |
| ssr3122  | G0:0006629 | 0.008  | slr1462 | G0:0030001 | 0.0056 | slr0519 | G0:0043234 | 0.0041 | slr7013 | G0:0006730 | 0.0028 | slr0784  | G0:0016051 | 0.0016 |
| slr1073  | G0:0006629 | 0.008  | slr1378 | G0:0006886 | 0.0056 | slr1667 | G0:0043234 | 0.0041 | sl10802 | G0:0006730 | 0.0028 | sl11355  | G0:0016051 | 0.0016 |
| sl11761  | G0:0006629 | 0.008  | slr7012 | G0:0006886 | 0.0056 | sl10319 | G0:0043234 | 0.0041 | sl11956 | G0:0016051 | 0.0028 | sl11773  | G0:0016051 | 0.0016 |
| sl11086  | G0:0006629 | 0.008  | slr0959 | G0:0030001 | 0.0056 | sl11315 | G0:0043234 | 0.0041 | sl11306 | G0:0006730 | 0.0028 | slr0852  | G0:0006725 | 0.0016 |
| slr0023  | G0:0006629 | 0.008  | sl11853 | G0:0030001 | 0.0056 | sl10564 | G0:0043234 | 0.0041 | sl10811 | G0:0006730 | 0.0028 | slr0362  | G0:0016051 | 0.0016 |
| slr1964  | G0:0006629 | 0.008  | slr0151 | G0:0030001 | 0.0056 | slr0924 | G0:0043234 | 0.0041 | slr1862 | G0:0016051 | 0.0028 | sl110751 | G0:0016051 | 0.0016 |
| sl10645  | G0:0006629 | 0.008  | sl11773 | G0:0030001 | 0.0056 | slr2144 | G0:0043234 | 0.0041 | slr1210 | G0:0016070 | 0.0028 | sl10446  | G0:0044267 | 0.0016 |
| slr0723  | G0:0006629 | 0.008  | slr0196 | G0:0006886 | 0.0056 | sl11002 | G0:0043234 | 0.0041 | slr1468 | G0:0006730 | 0.0028 | slr1306  | G0:0016051 | 0.0016 |
| sl110703 | G0:0006629 | 0.008  | slr1188 | G0:0030001 | 0.0056 | sl10539 | G0:0043234 | 0.0041 | sl10406 | G0:0006730 | 0.0028 | slr0907  | G0:0016051 | 0.0016 |
| sl10780  | G0:0006629 | 0.008  | sl11495 | G0:0006164 | 0.0056 | slr1964 | G0:0043234 | 0.0041 | sl10688 | G0:0016051 | 0.0028 | slr0199  | G0:0016051 | 0.0016 |
| slr1572  | G0:0006629 | 0.008  | slr1116 | G0:0006886 | 0.0056 | sl10243 | G0:0043234 | 0.0041 | slr1259 | G0:0016051 | 0.0028 | sl11671  | G0:0006725 | 0.0016 |
| sl10066  | G0:0006629 | 0.008  | slr0271 | G0:0006164 | 0.0056 | sl10676 | G0:0043234 | 0.0041 | slr7098 | G0:0006730 | 0.0028 | sl11219  | G0:0006725 | 0.0016 |
| ssl0242  | G0:0006629 | 0.008  | sl10048 | G0:0006886 | 0.0056 | sl10156 | G0:0043234 | 0.0041 | slr1084 | G0:0016070 | 0.0028 | sl11939  | G0:0016051 | 0.0016 |
| slr0702  | G0:0006164 | 0.0079 | sl10487 | G0:0006886 | 0.0056 | sl11874 | G0:0043234 | 0.0041 | slr0723 | G0:0016070 | 0.0028 | sl11348  | G0:0016051 | 0.0016 |
| sl10588  | G0:0006164 | 0.0079 | slr1753 | G0:0030001 | 0.0056 | sl10980 | G0:0043234 | 0.0041 | slr0023 | G0:0016070 | 0.0028 | sl11166  | G0:0006725 | 0.0016 |
| sl10590  | G0:0006164 | 0.0079 | slr5119 | G0:0006886 | 0.0056 | sl10843 | G0:0043234 | 0.0041 | ssl5098 | G0:0006730 | 0.0028 | slr0598  | G0:0016051 | 0.0016 |
| sl10585  | G0:0006164 | 0.0079 | slr0270 | G0:0006164 | 0.0056 | slr0404 | G0:0043234 | 0.0041 | sl15046 | G0:0006730 | 0.0028 | slr1218  | G0:0016051 | 0.0016 |
| slr0318  | G0:0006164 | 0.0079 | slr1069 | G0:0006886 | 0.0056 | slr1437 | G0:0043234 | 0.0041 | slr0103 | G0:0016070 | 0.0028 | slr7098  | G0:0016051 | 0.0016 |
| ssl0739  | G0:0006164 | 0.0079 | slr2004 | G0:0006164 | 0.0056 | sl10180 | G0:0043234 | 0.0041 | slr1104 | G0:0006730 | 0.0028 | slr1546  | G0:0016051 | 0.0016 |
| sl11660  | G0:0006164 | 0.0079 | slr1127 | G0:0006164 | 0.0056 | slr1413 | G0:0043234 | 0.0041 | ssr3341 | G0:0006730 | 0.0028 | ssr0692  | G0:0044267 | 0.0016 |
| sm10011  | G0:0006164 | 0.0079 | slr2049 | G0:0006164 | 0.0056 | sl10737 | G0:0043234 | 0.0041 | slr1189 | G0:0006730 | 0.0028 | sl10448  | G0:0016051 | 0.0016 |
| slr0935  | G0:0006164 | 0.0079 | slr1577 | G0:0006164 | 0.0056 | slr1530 | G0:0043234 | 0.0041 | slr0468 | G0:0016051 | 0.0028 | sl10406  | G0:0016051 | 0.0016 |
| sl11654  | G0:0006164 | 0.0079 | sl11433 | G0:0006164 | 0.0056 | slr1338 | G0:0043234 | 0.0041 | slr0065 | G0:0006730 | 0.0028 | slr2105  | G0:0016051 | 0.0016 |
| slr1977  | G0:0006164 | 0.0079 | slr0569 | G0:0006886 | 0.0056 | slr1854 | G0:0043234 | 0.0041 | sl11660 | G0:0016051 | 0.0028 | slr0333  | G0:0016051 | 0.0016 |
| slr0789  | G0:0006164 | 0.0079 | slr0601 | G0:0006886 | 0.0056 | slr1690 | G0:0043234 | 0.0041 | slr1591 | G0:0006164 | 0.0028 | sl10443  | G0:0016051 | 0.0016 |
| slr1827  | G0:0006164 | 0.0079 | sl11447 | G0:0030001 | 0.0056 | slr2120 | G0:0043234 | 0.0041 | sl10752 | G0:0016051 | 0.0028 | sl10860  | G0:0016051 | 0.0016 |
| sl10871  | G0:0006164 | 0.0079 | slr0821 | G0:0030001 | 0.0056 | sl10066 | G0:0043234 | 0.0041 | sl17065 | G0:0016051 | 0.0028 | slr0769  | G0:0016051 | 0.0016 |
| slr1431  | G0:0008168 | 0.0079 | sl10360 | G0:0006164 | 0.0056 | sl10585 | G0:0043234 | 0.0041 | slr5017 | G0:0006730 | 0.0028 | ssr6048  | G0:0016051 | 0.0016 |
| slr0876  | G0:0016810 | 0.0078 | slr2105 | G0:0030001 | 0.0056 | sl11950 | G0:0043234 | 0.0041 | slr1082 | G0:0016051 | 0.0028 | slr0971  | G0:0016051 | 0.0016 |
| sl10596  | G0:0016810 | 0.0078 | ssl6061 | G0:0006164 | 0.0056 | sl11736 | G0:0043234 | 0.0041 | slr6101 | G0:0006730 | 0.0028 | sl10168  | G0:0016051 | 0.0016 |
| sl12006  | G0:0016810 | 0.0078 | ssl5027 | G0:0006886 | 0.0056 | slr1999 | G0:0043234 | 0.0041 | slr1957 | G0:0006730 | 0.0028 | sl16054  | G0:0016051 | 0.0016 |
| ssr2848  | G0:0016810 | 0.0078 | ssr5120 | G0:0006886 | 0.0056 | slr1541 | G0:0043234 | 0.0041 | slr0784 | G0:0006730 | 0.0028 | sl10803  | G0:0016051 | 0.0016 |
| slr1896  | G0:0016810 | 0.0078 | slr0407 | G0:0030001 | 0.0056 | sl11061 | G0:0043234 | 0.0041 | sl10319 | G0:0016051 | 0.0028 | sl11022  | G0:0016051 | 0.0016 |
| sl10283  | G0:0016810 | 0.0078 | slr5127 | G0:0006164 | 0.0056 | slr0104 | G0:0043234 | 0.0041 | slr0989 | G0:0016051 | 0.0028 | sl11485  | G0:0016051 | 0.0016 |
| slr1023  | G0:0016810 | 0.0078 | sl10658 | G0:0006886 | 0.0056 | sl10911 | G0:0043234 | 0.0041 | sl11251 | G0:0016051 | 0.0028 | sl15062  | G0:0016051 | 0.0016 |
| sl10864  | G0:0016810 | 0.0078 | slr0813 | G0:0006164 | 0.0056 | slr1117 | G0:0043234 | 0.0041 | sl10147 | G0:0016051 | 0.0028 | sl10786  | G0:0016051 | 0.0016 |
| slr0209  | G0:0016810 | 0.0078 | sl10369 | G0:0006886 | 0.0056 | slr1809 | G0:0043234 | 0.0041 | sl10761 | G0:0006730 | 0.0028 | ssl1464  | G0:0016051 | 0.0016 |
| slr1900  | G0:0016810 | 0.0078 | sl10498 | G0:0030001 | 0.0056 | sl10449 | G0:0043234 | 0.0041 | sl11240 | G0:0016051 | 0.0028 | sl11318  | G0:0006725 | 0.0016 |
| slr1533  | G0:0016810 | 0.0078 | slr0912 | G0:0030001 | 0.0056 | sl11658 | G0:0043234 | 0.0041 | sl11225 | G0:0016051 | 0.0028 | slr0818  | G0:0044267 | 0.0016 |
| sl11174  | G0:0016810 | 0.0078 | sl10608 | G0:0006164 | 0.0056 | sl11505 | G0:0043234 | 0.0041 | slr1572 | G0:0016070 | 0.0028 | sl10760  | G0:0016051 | 0.0016 |
| sl11060  | G0:0016810 | 0.0078 | slr0168 | G0:0030001 | 0.0056 | slr2048 | G0:0043234 | 0.0041 | slr1676 | G0:0016070 | 0.0028 | sl11203  | G0:0016051 | 0.0016 |
| sl10301  | G0:0016810 | 0.0078 | slr6106 | G0:0006164 | 0.0056 | sl11086 | G0:0043234 | 0.0041 | sl10853 | G0:0006730 | 0.0028 | sl10763  | G0:0009116 | 0.0016 |
| slr2025  | G0:0016810 | 0.0078 | slr0374 | G0:0006886 | 0.0056 | ssr2551 | G0:0043234 | 0.0041 | slr0038 | G0:0006730 | 0.0028 | ssl0312  | G0:0016051 | 0.0016 |
| slr0305  | G0:0016810 | 0.0078 | slr1546 | G0:0006886 | 0.0056 | slr1259 | G0:0043234 | 0.0041 | slr0579 | G0:0016829 | 0.0028 | slr1813  | G0:0016051 | 0.0016 |
| sl11934  | G0:0016810 | 0.0078 | ssl1417 | G0:0006886 | 0.0056 | slr0742 | G0:0043234 | 0.0041 | sl10361 | G0:0005216 | 0.0028 | slr7013  | G0:0016051 | 0.0016 |
| slr0937  | G0:0016810 | 0.0078 | sl10547 | G0:0006164 | 0.0056 | sl10744 | G0:0043234 | 0.0041 | ssl1377 | G0:0005216 | 0.0028 | slr1576  | G0:0016051 | 0.0016 |
| slr1519  | G0:0016810 | 0.0078 | slr0712 | G0:0006164 | 0.0056 | sl11656 | G0:0043234 | 0.0041 | slr0848 | G0:0016829 | 0.0028 | ssr0332  | G0:0016051 | 0.0016 |
| ssr3532  | G0:0016810 | 0.0078 | slr1407 | G0:0006886 | 0.0056 | slr0698 | G0:0043234 | 0.0041 | ssr1256 | G0:0016829 | 0.0028 | sl10647  | G0:0009116 | 0.0016 |
| slr1376  | G0:0016810 | 0.0078 | ssl2717 | G0:0030001 | 0.0056 | sl10410 | G0:0043234 | 0.0041 | slr0208 | G0:0016829 | 0.0028 | slr0810  | G0:0044249 | 0.0016 |
| sl11219  | G0:0016810 | 0.0078 | ssl1004 | G0:0006886 | 0.0056 | slr0650 | G0:0043234 | 0.0041 | slr1800 | G0:0005216 | 0.0028 | slr0366  | G0:0044249 | 0.0016 |
| sl10513  | G0:0016810 | 0.0078 | slr6015 | G0:0030001 | 0.0056 | sl10177 | G0:0043234 | 0.0041 | slr0514 | G0:0005216 | 0.0028 | sl17047  | G0:0016051 | 0.0016 |

|         |            |        |         |            |        |         |            |        |         |            |        |         |            |        |
|---------|------------|--------|---------|------------|--------|---------|------------|--------|---------|------------|--------|---------|------------|--------|
| slr0376 | GO:0016810 | 0.0078 | ssl0350 | GO:0006164 | 0.0056 | slr0172 | GO:0043234 | 0.0041 | sl10606 | GO:0016829 | 0.0028 | slr6004 | GO:0016051 | 0.0016 |
| slr1143 | GO:0015031 | 0.0076 | slr5024 | GO:0006164 | 0.0056 | slr1152 | GO:0043234 | 0.0041 | sl11250 | GO:0016829 | 0.0028 | sl11461 | GO:0016051 | 0.0016 |
| ssr2201 | GO:0019538 | 0.0076 | ssl5008 | GO:0006164 | 0.0056 | slr0954 | GO:0043234 | 0.0041 | sl11749 | GO:0016829 | 0.0028 | slr6014 | GO:0016051 | 0.0016 |
| sl10702 | GO:0019538 | 0.0076 | slr0863 | GO:0006164 | 0.0056 | slr1053 | GO:0043234 | 0.0041 | sl10238 | GO:0016829 | 0.0028 | ssr3410 | GO:0016051 | 0.0016 |
| slr1811 | GO:0015031 | 0.0076 | slr1507 | GO:0006164 | 0.0056 | slr0050 | GO:0043234 | 0.0041 | slr0978 | GO:0005216 | 0.0028 | sl10048 | GO:0016051 | 0.0016 |
| slr1032 | GO:0019538 | 0.0076 | slr5021 | GO:0030001 | 0.0056 | sl11873 | GO:0043234 | 0.0041 | slr0607 | GO:0005216 | 0.0028 | sl11942 | GO:0006725 | 0.0016 |
| sl10647 | GO:0019538 | 0.0076 | slr6067 | GO:0006886 | 0.0056 | slr0941 | GO:0043234 | 0.0041 | sl10183 | GO:0005216 | 0.0028 | slr6006 | GO:0016051 | 0.0016 |
| slr2084 | GO:0019538 | 0.0076 | slr6094 | GO:0006164 | 0.0056 | sl10982 | GO:0043234 | 0.0041 | sl10192 | GO:0005216 | 0.0028 | sl11004 | GO:0016051 | 0.0016 |
| sl10505 | GO:0015031 | 0.0076 | sl11652 | GO:0006164 | 0.0056 | sl11541 | GO:0043234 | 0.0041 | slr1644 | GO:0004518 | 0.0028 | slr1468 | GO:0016051 | 0.0016 |
| ssr1258 | GO:0019538 | 0.0076 | sl11735 | GO:0006886 | 0.0056 | sl10639 | GO:0043234 | 0.0041 | slr0923 | GO:0005216 | 0.0028 | sl11433 | GO:0006725 | 0.0016 |
| sl10558 | GO:0015031 | 0.0076 | ssl5129 | GO:0006886 | 0.0056 | sl10185 | GO:0043234 | 0.0041 | sl10558 | GO:0005216 | 0.0028 | sl10815 | GO:0016051 | 0.0016 |
| sl10192 | GO:0015031 | 0.0076 | sl11906 | GO:0006886 | 0.0056 | sl10225 | GO:0043234 | 0.0041 | sl10932 | GO:0016829 | 0.0028 | sl10174 | GO:0016051 | 0.0016 |
| sl11119 | GO:0019538 | 0.0076 | slr7012 | GO:0030001 | 0.0056 | slr0006 | GO:0043234 | 0.0041 | ssr2803 | GO:0016829 | 0.0028 | ssr2422 | GO:0016051 | 0.0016 |
| slr0440 | GO:0004872 | 0.0076 | slr0655 | GO:0030001 | 0.0056 | slr0204 | GO:0043234 | 0.0041 | slr0442 | GO:0016829 | 0.0028 | sl15090 | GO:0016051 | 0.0016 |
| slr6090 | GO:0004872 | 0.0076 | slr0300 | GO:0006164 | 0.0056 | sl10007 | GO:0043234 | 0.0041 | sl11526 | GO:0005216 | 0.0028 | ssr2843 | GO:0044249 | 0.0016 |
| slr6100 | GO:0004872 | 0.0076 | slr0305 | GO:0006164 | 0.0056 | slr0483 | GO:0043234 | 0.0041 | sl10822 | GO:0005216 | 0.0028 | sl10102 | GO:0016051 | 0.0016 |
| sl10867 | GO:0004872 | 0.0076 | sl11174 | GO:0006164 | 0.0056 | sl10888 | GO:0043234 | 0.0041 | sl11902 | GO:0016829 | 0.0028 | slr1657 | GO:0016051 | 0.0016 |
| ssl8003 | GO:0004872 | 0.0076 | slr7016 | GO:0006886 | 0.0056 | slr1493 | GO:0043234 | 0.0041 | slr1431 | GO:0004518 | 0.0028 | sl11160 | GO:0016051 | 0.0016 |
| sl10775 | GO:0004872 | 0.0076 | slr0400 | GO:0030001 | 0.0056 | sl11730 | GO:0043234 | 0.0041 | slr0609 | GO:0005976 | 0.0027 | sl10350 | GO:0006812 | 0.0015 |
| slr0912 | GO:0004872 | 0.0076 | slr1034 | GO:0006164 | 0.0056 | ssr2009 | GO:0043234 | 0.0041 | slr0740 | GO:0005976 | 0.0027 | sl10446 | GO:0016853 | 0.0015 |
| slr1102 | GO:0004872 | 0.0076 | sl11638 | GO:0030001 | 0.0056 | slr0770 | GO:0043234 | 0.0041 | slr0514 | GO:0005976 | 0.0027 | slr1471 | GO:0016772 | 0.0015 |
| sl10181 | GO:0004872 | 0.0076 | sl11866 | GO:0006886 | 0.0056 | sl11675 | GO:0043234 | 0.0041 | slr0496 | GO:0005976 | 0.0027 | sl10413 | GO:0016810 | 0.0015 |
| slr1611 | GO:0004872 | 0.0076 | sl15006 | GO:0006886 | 0.0056 | sl10451 | GO:0043234 | 0.0041 | slr1959 | GO:0005976 | 0.0027 | sl11446 | GO:0016853 | 0.0015 |
| sl11511 | GO:0004872 | 0.0076 | slr0964 | GO:0046873 | 0.0056 | ssl8008 | GO:0043234 | 0.0041 | slr1062 | GO:0016070 | 0.0026 | sl11477 | GO:0016853 | 0.0015 |
| slr0971 | GO:0004872 | 0.0076 | sl11130 | GO:0046873 | 0.0056 | ssl3382 | GO:0043234 | 0.0041 | ssr3300 | GO:0016070 | 0.0026 | slr1699 | GO:0016810 | 0.0015 |
| slr1218 | GO:0004872 | 0.0076 | slr1353 | GO:0004872 | 0.0056 | slr0386 | GO:0043234 | 0.0041 | sl11352 | GO:0016070 | 0.0026 | slr0818 | GO:0016853 | 0.0015 |
| ssl5095 | GO:0004872 | 0.0076 | sl10360 | GO:0004872 | 0.0056 | slr0249 | GO:0043234 | 0.0041 | slr1287 | GO:0016070 | 0.0026 | slr1052 | GO:0016810 | 0.0015 |
| slr1407 | GO:0004872 | 0.0076 | slr1927 | GO:0046873 | 0.0056 | slr0957 | GO:0043234 | 0.0041 | slr1259 | GO:0016070 | 0.0026 | ssr3154 | GO:0016853 | 0.0015 |
| slr6005 | GO:0004872 | 0.0076 | slr1534 | GO:0046873 | 0.0056 | slr1177 | GO:0043234 | 0.0041 | slr2080 | GO:0016070 | 0.0026 | sl11233 | GO:0016051 | 0.0014 |
| ssl1792 | GO:0004872 | 0.0076 | ssl1417 | GO:0046873 | 0.0056 | sl11240 | GO:0043234 | 0.0041 | slr1169 | GO:0016070 | 0.0026 | sl11902 | GO:0016051 | 0.0014 |
| slr1103 | GO:0004872 | 0.0076 | ssl2781 | GO:0046873 | 0.0056 | sl11512 | GO:0043234 | 0.0041 | slr1415 | GO:0016070 | 0.0026 | slr0645 | GO:0016051 | 0.0014 |
| slr1657 | GO:0004872 | 0.0076 | slr1576 | GO:0046873 | 0.0056 | slr0975 | GO:0043234 | 0.0041 | slr0111 | GO:0016070 | 0.0026 | ssl7007 | GO:0016051 | 0.0014 |
| slr0145 | GO:0004872 | 0.0076 | slr1025 | GO:0004872 | 0.0056 | slr0144 | GO:0043234 | 0.0041 | sl11399 | GO:0016070 | 0.0026 | sl18001 | GO:0016051 | 0.0014 |
| sl10397 | GO:0004872 | 0.0076 | ssr6026 | GO:0046873 | 0.0056 | sl11660 | GO:0043234 | 0.0041 | slr0930 | GO:0016070 | 0.0026 | slr1438 | GO:0016051 | 0.0014 |
| ssl5129 | GO:0004872 | 0.0076 | slr7098 | GO:0046873 | 0.0056 | sl10781 | GO:0043234 | 0.0041 | sl10623 | GO:0016070 | 0.0026 | sl10069 | GO:0016051 | 0.0014 |
| ssr7036 | GO:0004872 | 0.0076 | slr0380 | GO:0046873 | 0.0056 | sl11241 | GO:0043234 | 0.0041 | slr0232 | GO:0016070 | 0.0026 | sl10298 | GO:0016051 | 0.0014 |
| slr0356 | GO:0004872 | 0.0076 | slr0211 | GO:0004872 | 0.0056 | slr0392 | GO:0043234 | 0.0041 | slr0924 | GO:0016070 | 0.0026 | slr0416 | GO:0016051 | 0.0014 |
| sl11960 | GO:0004872 | 0.0076 | slr0606 | GO:0046873 | 0.0056 | slr2115 | GO:0043234 | 0.0041 | sl10572 | GO:0016070 | 0.0026 | slr0109 | GO:0016051 | 0.0014 |
| ssl5031 | GO:0004872 | 0.0076 | sl11218 | GO:0004872 | 0.0056 | sl11582 | GO:0043234 | 0.0041 | slr1647 | GO:0016070 | 0.0026 | ssr2803 | GO:0016051 | 0.0014 |
| sl10436 | GO:0004872 | 0.0076 | sl11765 | GO:0046873 | 0.0056 | slr1082 | GO:0043234 | 0.0041 | sl11634 | GO:0016070 | 0.0026 | slr1790 | GO:0016051 | 0.0014 |
| sl11414 | GO:0004872 | 0.0076 | sl11247 | GO:0004872 | 0.0056 | slr1074 | GO:0043234 | 0.0041 | slr0596 | GO:0016070 | 0.0026 | slr0651 | GO:0016051 | 0.0014 |
| ssl2471 | GO:0004872 | 0.0076 | ssr0536 | GO:0004872 | 0.0056 | sl11654 | GO:0043234 | 0.0041 | slr1613 | GO:0016070 | 0.0026 | sl10031 | GO:0016051 | 0.0014 |
| slr6049 | GO:0004872 | 0.0076 | sl11586 | GO:0004872 | 0.0056 | sl11761 | GO:0043234 | 0.0041 | sl11446 | GO:0016788 | 0.0026 | sl10272 | GO:0016051 | 0.0014 |
| slr1914 | GO:0004872 | 0.0076 | slr0551 | GO:0004872 | 0.0056 | slr1169 | GO:0043234 | 0.0041 | sl11222 | GO:0016788 | 0.0026 | ssr2998 | GO:0016051 | 0.0014 |
| sl10659 | GO:0004872 | 0.0076 | sl11378 | GO:0046873 | 0.0056 | slr1383 | GO:0043234 | 0.0041 | slr0642 | GO:0016788 | 0.0026 | ssr6078 | GO:0016051 | 0.0014 |
| slr1920 | GO:0004872 | 0.0076 | ssl7046 | GO:0046873 | 0.0056 | sl11040 | GO:0043234 | 0.0041 | sl11528 | GO:0016788 | 0.0026 | sl11068 | GO:0016051 | 0.0014 |
| slr0601 | GO:0004872 | 0.0076 | sl12015 | GO:0046873 | 0.0056 | slr0060 | GO:0043234 | 0.0041 | slr1773 | GO:0016788 | 0.0026 | sl11640 | GO:0016051 | 0.0014 |
| slr0146 | GO:0004872 | 0.0076 | slr1097 | GO:0046873 | 0.0056 | sl11830 | GO:0043234 | 0.0041 | sl10641 | GO:0044237 | 0.0025 | slr6012 | GO:0016051 | 0.0014 |
| slr1187 | GO:0004872 | 0.0076 | sl10293 | GO:0046873 | 0.0056 | slr0789 | GO:0043234 | 0.0041 | sl10558 | GO:0006790 | 0.0025 | sl11486 | GO:0016051 | 0.0014 |
| sl17064 | GO:0004872 | 0.0076 | slr1188 | GO:0046873 | 0.0056 | slr1303 | GO:0043234 | 0.0041 | sl10783 | GO:0006790 | 0.0025 | sl10230 | GO:0016051 | 0.0014 |
| slr1195 | GO:0004872 | 0.0076 | sl10994 | GO:0046873 | 0.0056 | sl10588 | GO:0043234 | 0.0041 | slr1866 | GO:0016070 | 0.0025 | slr1681 | GO:0016051 | 0.0014 |
| slr6064 | GO:0004872 | 0.0076 | sl10168 | GO:0046873 | 0.0056 | slr1071 | GO:0043234 | 0.0041 | sl11174 | GO:0016070 | 0.0025 | sl11340 | GO:0016051 | 0.0014 |
| sl11696 | GO:0004872 | 0.0076 | slr1519 | GO:0004872 | 0.0056 | sl10669 | GO:0043234 | 0.0041 | slr1127 | GO:0016070 | 0.0025 | ssl0410 | GO:0016051 | 0.0014 |
| sl11485 | GO:0004872 | 0.0076 | sl15033 | GO:0046873 | 0.0056 | sl10645 | GO:0043234 | 0.0041 | slr1034 | GO:0016070 | 0.0025 | sl11151 | GO:0016051 | 0.0014 |

|         |            |        |         |            |        |         |            |        |         |            |        |         |            |        |
|---------|------------|--------|---------|------------|--------|---------|------------|--------|---------|------------|--------|---------|------------|--------|
| sl10811 | G0:0004872 | 0.0076 | sl10263 | G0:0004872 | 0.0056 | slr2121 | G0:0043234 | 0.0041 | sl10096 | G0:0016070 | 0.0025 | sl11424 | G0:0006520 | 0.0014 |
| slr0890 | G0:0004872 | 0.0076 | slr0376 | G0:0004872 | 0.0056 | sl10981 | G0:0043234 | 0.0041 | slr1865 | G0:0006790 | 0.0025 | slr1032 | G0:0016051 | 0.0014 |
| sl11769 | G0:0004872 | 0.0076 | ssl3451 | G0:0046873 | 0.0056 | sl10085 | G0:0043234 | 0.0041 | sl10445 | G0:0044237 | 0.0025 | slr0848 | G0:0006520 | 0.0014 |
| sl18002 | G0:0004872 | 0.0076 | slr1907 | G0:0046873 | 0.0056 | slr2080 | G0:0043234 | 0.0041 | sl10910 | G0:0006790 | 0.0025 | ssr5092 | G0:0016051 | 0.0014 |
| ssl5007 | G0:0004872 | 0.0076 | slr6072 | G0:0046873 | 0.0056 | sl10787 | G0:0043234 | 0.0041 | sl17078 | G0:0016829 | 0.0025 | slr6091 | G0:0016051 | 0.0014 |
| ssr6046 | G0:0004872 | 0.0076 | slr1505 | G0:0004872 | 0.0056 | sl10280 | G0:0043234 | 0.0041 | slr7073 | G0:0016829 | 0.0025 | slr0980 | G0:0006520 | 0.0014 |
| ssr5120 | G0:0004872 | 0.0076 | sl10424 | G0:0004872 | 0.0056 | slr0373 | G0:0043234 | 0.0041 | sl10736 | G0:0016829 | 0.0025 | sl10482 | G0:0016051 | 0.0014 |
| sl11160 | G0:0004872 | 0.0076 | slr0146 | G0:0046873 | 0.0056 | sl10381 | G0:0043234 | 0.0041 | slr0625 | G0:0016829 | 0.0025 | slr0755 | G0:0016051 | 0.0014 |
| sl11866 | G0:0004872 | 0.0076 | sl10419 | G0:0046873 | 0.0056 | sl11693 | G0:0043234 | 0.0041 | ssl2595 | G0:0016829 | 0.0025 | ssr6019 | G0:0016051 | 0.0014 |
| slr6006 | G0:0004872 | 0.0076 | sl11764 | G0:0046873 | 0.0056 | sl10141 | G0:0043234 | 0.0041 | slr1819 | G0:0016829 | 0.0025 | slr1875 | G0:0016051 | 0.0014 |
| sl11378 | G0:0004872 | 0.0076 | slr0264 | G0:0046873 | 0.0056 | slr0975 | G0:0044262 | 0.004  | slr6028 | G0:0016829 | 0.0025 | ssl0832 | G0:0006520 | 0.0014 |
| sl10853 | G0:0004872 | 0.0076 | slr1657 | G0:0046873 | 0.0056 | slr0060 | G0:0044262 | 0.004  | ssr5074 | G0:0016829 | 0.0025 | ssr3467 | G0:0016051 | 0.0014 |
| slr1186 | G0:0004872 | 0.0076 | sl11123 | G0:0046873 | 0.0056 | sl11656 | G0:0006790 | 0.004  | slr0755 | G0:0016829 | 0.0025 | sl10875 | G0:0016051 | 0.0014 |
| slr6004 | G0:0004872 | 0.0076 | sl10487 | G0:0046873 | 0.0056 | sl10189 | G0:0044262 | 0.004  | ssr7084 | G0:0016829 | 0.0025 | sl11289 | G0:0016051 | 0.0014 |
| slr1927 | G0:0004872 | 0.0076 | sl11606 | G0:0046873 | 0.0056 | ssr2439 | G0:0006790 | 0.004  | sl11898 | G0:0016829 | 0.0025 | sl10702 | G0:0016051 | 0.0014 |
| slr1315 | G0:0004872 | 0.0076 | sl11174 | G0:0004872 | 0.0056 | sl10997 | G0:0044262 | 0.004  | ssl0788 | G0:0016829 | 0.0025 | ssr1256 | G0:0016051 | 0.0014 |
| slr1384 | G0:0004872 | 0.0076 | slr6021 | G0:0046873 | 0.0056 | slr0664 | G0:0044262 | 0.004  | ssr1768 | G0:0016829 | 0.0025 | slr1789 | G0:0016051 | 0.0014 |
| sl11063 | G0:0004872 | 0.0076 | sl11004 | G0:0046873 | 0.0056 | sl10449 | G0:0044262 | 0.004  | ssl6092 | G0:0016829 | 0.0025 | slr0590 | G0:0016051 | 0.0014 |
| sl18004 | G0:0004872 | 0.0076 | slr1391 | G0:0004872 | 0.0056 | ssl0352 | G0:0006790 | 0.004  | slr6009 | G0:0016829 | 0.0025 | ssl5015 | G0:0016051 | 0.0014 |
| ssl2245 | G0:0004872 | 0.0076 | slr0250 | G0:0004872 | 0.0056 | ssr2962 | G0:0006790 | 0.004  | ssr3572 | G0:0016829 | 0.0025 | sl15089 | G0:0016051 | 0.0014 |
| ssl2148 | G0:0004872 | 0.0076 | slr1195 | G0:0046873 | 0.0056 | sl11072 | G0:0044262 | 0.004  | sl11142 | G0:0016829 | 0.0025 | slr1911 | G0:0016051 | 0.0014 |
| slr1270 | G0:0004872 | 0.0076 | sl10854 | G0:0004872 | 0.0056 | slr1638 | G0:0006790 | 0.004  | ssl1690 | G0:0016829 | 0.0025 | slr7010 | G0:0016051 | 0.0014 |
| slr0380 | G0:0004872 | 0.0076 | slr1547 | G0:0046873 | 0.0056 | slr1275 | G0:0006790 | 0.004  | sl18027 | G0:0016829 | 0.0025 | slr0326 | G0:0016051 | 0.0014 |
| sl11163 | G0:0004872 | 0.0076 | slr1186 | G0:0046873 | 0.0056 | sl10066 | G0:0006790 | 0.004  | sl10939 | G0:0016829 | 0.0025 | slr0771 | G0:0016051 | 0.0014 |
| slr1484 | G0:0004872 | 0.0076 | slr0852 | G0:0004872 | 0.0056 | sl10588 | G0:0044262 | 0.004  | slr0269 | G0:0016829 | 0.0025 | ssr1558 | G0:0016051 | 0.0014 |
| slr1472 | G0:0004872 | 0.0076 | ssl5096 | G0:0046873 | 0.0056 | sl11054 | G0:0044262 | 0.004  | ssr2318 | G0:0016829 | 0.0025 | slr1935 | G0:0016051 | 0.0014 |
| ssr6032 | G0:0004872 | 0.0076 | slr1218 | G0:0046873 | 0.0056 | slr1203 | G0:0006790 | 0.004  | slr1670 | G0:0016829 | 0.0025 | sl10736 | G0:0016051 | 0.0014 |
| sgl0001 | G0:0004872 | 0.0076 | slr6015 | G0:0046873 | 0.0056 | sl10756 | G0:0006790 | 0.004  | slr1875 | G0:0016829 | 0.0025 | ssr5121 | G0:0016051 | 0.0014 |
| slr1768 | G0:0004872 | 0.0076 | slr1107 | G0:0004872 | 0.0056 | sl10602 | G0:0044262 | 0.004  | slr1627 | G0:0016829 | 0.0025 | slr0637 | G0:0016051 | 0.0014 |
| slr7098 | G0:0004872 | 0.0076 | sl11160 | G0:0046873 | 0.0056 | slr1073 | G0:0006790 | 0.004  | sl10249 | G0:0016829 | 0.0025 | slr0919 | G0:0016051 | 0.0014 |
| slr1998 | G0:0004872 | 0.0076 | ssr3341 | G0:0046873 | 0.0056 | sl11201 | G0:0044262 | 0.004  | slr7071 | G0:0016829 | 0.0025 | sl11464 | G0:0016051 | 0.0014 |
| ssl1520 | G0:0004872 | 0.0076 | slr1659 | G0:0004872 | 0.0056 | slr0930 | G0:0044262 | 0.004  | sl11192 | G0:0016829 | 0.0025 | sl10071 | G0:0016051 | 0.0014 |
| slr6072 | G0:0004872 | 0.0076 | sl10609 | G0:0046873 | 0.0056 | slr1999 | G0:0006790 | 0.004  | sl18035 | G0:0016829 | 0.0025 | sl10269 | G0:0016051 | 0.0014 |
| ssr3189 | G0:0004872 | 0.0076 | sl15090 | G0:0046873 | 0.0056 | slr0386 | G0:0006790 | 0.004  | slr7057 | G0:0016829 | 0.0025 | ssl1918 | G0:0016051 | 0.0014 |
| ssl1004 | G0:0004872 | 0.0076 | sl10481 | G0:0046873 | 0.0056 | sl11541 | G0:0044262 | 0.004  | slr0459 | G0:0016829 | 0.0025 | slr5024 | G0:0016051 | 0.0014 |
| slr1547 | G0:0004872 | 0.0076 | ssr6048 | G0:0046873 | 0.0056 | slr2111 | G0:0006790 | 0.004  | slr2052 | G0:0016829 | 0.0025 | ssl3615 | G0:0016051 | 0.0014 |
| slr7082 | G0:0004872 | 0.0076 | slr7013 | G0:0046873 | 0.0056 | slr1210 | G0:0006790 | 0.004  | slr2003 | G0:0016829 | 0.0025 | sl11583 | G0:0016051 | 0.0014 |
| slr6014 | G0:0004872 | 0.0076 | sl15046 | G0:0046873 | 0.0056 | slr1169 | G0:0044262 | 0.004  | sl10376 | G0:0016829 | 0.0025 | ssr6086 | G0:0016051 | 0.0014 |
| ssr6003 | G0:0004872 | 0.0076 | sl11447 | G0:0046873 | 0.0056 | sl10669 | G0:0044262 | 0.004  | sl11319 | G0:0016829 | 0.0025 | slr0334 | G0:0016051 | 0.0014 |
| slr0505 | G0:0004872 | 0.0076 | slr1864 | G0:0046873 | 0.0056 | slr0887 | G0:0044262 | 0.004  | slr1206 | G0:0016829 | 0.0025 | ssr3570 | G0:0016051 | 0.0014 |
| slr1535 | G0:0004872 | 0.0076 | ssr6003 | G0:0046873 | 0.0056 | slr0845 | G0:0006790 | 0.004  | sl11340 | G0:0016829 | 0.0025 | ssr2972 | G0:0016051 | 0.0014 |
| slr0148 | G0:0004872 | 0.0076 | sl10448 | G0:0046873 | 0.0056 | sl10737 | G0:0044262 | 0.004  | ssr6030 | G0:0016829 | 0.0025 | slr0575 | G0:0016051 | 0.0014 |
| sl11004 | G0:0004872 | 0.0076 | slr1957 | G0:0046873 | 0.0056 | slr0941 | G0:0006790 | 0.004  | sl10327 | G0:0016829 | 0.0025 | slr1396 | G0:0016051 | 0.0014 |
| slr7080 | G0:0004872 | 0.0076 | slr1398 | G0:0004872 | 0.0056 | slr1913 | G0:0006790 | 0.004  | ssl1378 | G0:0016829 | 0.0025 | sl18035 | G0:0016051 | 0.0014 |
| slr2105 | G0:0004872 | 0.0076 | sl11060 | G0:0004872 | 0.0056 | ssl3382 | G0:0044262 | 0.004  | slr0582 | G0:0016829 | 0.0025 | sl11882 | G0:0016051 | 0.0014 |
| slr6039 | G0:0004872 | 0.0076 | ssr6020 | G0:0046873 | 0.0056 | sl10414 | G0:0006790 | 0.004  | ssr5092 | G0:0016829 | 0.0025 | slr6009 | G0:0016051 | 0.0014 |
| ssl1923 | G0:0004872 | 0.0076 | sl11348 | G0:0046873 | 0.0056 | slr1266 | G0:0006790 | 0.004  | sl17006 | G0:0016829 | 0.0025 | slr7071 | G0:0016051 | 0.0014 |
| ssl2920 | G0:0004872 | 0.0076 | sl11880 | G0:0046873 | 0.0056 | slr2052 | G0:0005216 | 0.004  | ssl2971 | G0:0016829 | 0.0025 | sl15109 | G0:0016051 | 0.0014 |
| slr1468 | G0:0004872 | 0.0076 | sl11162 | G0:0046873 | 0.0056 | ssr6086 | G0:0005216 | 0.004  | slr6029 | G0:0016829 | 0.0025 | sl17089 | G0:0016051 | 0.0014 |
| ssr3304 | G0:0004872 | 0.0076 | slr0304 | G0:0004872 | 0.0056 | sl17089 | G0:0005216 | 0.004  | sl11609 | G0:0016829 | 0.0025 | sl15069 | G0:0016051 | 0.0014 |
| sl17062 | G0:0004872 | 0.0076 | ssl1972 | G0:0046873 | 0.0056 | ssl2595 | G0:0043169 | 0.004  | sl10321 | G0:0016829 | 0.0025 | ssl3829 | G0:0016051 | 0.0014 |
| sl11853 | G0:0004872 | 0.0076 | slr1896 | G0:0004872 | 0.0056 | ssr6024 | G0:0005216 | 0.004  | slr0645 | G0:0016829 | 0.0025 | slr1990 | G0:0016051 | 0.0014 |
| slr6073 | G0:0004872 | 0.0076 | slr0569 | G0:0046873 | 0.0056 | sl10060 | G0:0005216 | 0.004  | sl11926 | G0:0016829 | 0.0025 | ssr2781 | G0:0016051 | 0.0014 |
| sl11880 | G0:0004872 | 0.0076 | slr1546 | G0:0046873 | 0.0056 | slr6029 | G0:0005216 | 0.004  | slr6051 | G0:0016829 | 0.0025 | slr0816 | G0:0016051 | 0.0014 |

|          |            |        |          |            |        |          |            |       |          |            |        |          |            |        |
|----------|------------|--------|----------|------------|--------|----------|------------|-------|----------|------------|--------|----------|------------|--------|
| slr1813  | GO:0004872 | 0.0076 | sll0761  | GO:0046873 | 0.0056 | sll7034  | GO:0043169 | 0.004 | slr5127  | GO:0016829 | 0.0025 | slr1577  | GO:0016051 | 0.0014 |
| sll1130  | GO:0004872 | 0.0076 | ssl2009  | GO:0046873 | 0.0056 | slr1087  | GO:0005216 | 0.004 | slr0865  | GO:0016829 | 0.0025 | sll10157 | GO:0016051 | 0.0014 |
| sll1447  | GO:0004872 | 0.0076 | sll1722  | GO:0046873 | 0.0056 | ssr8047  | GO:0005216 | 0.004 | sll15128 | GO:0016829 | 0.0025 | sll10608 | GO:0016051 | 0.0014 |
| sll5034  | GO:0004872 | 0.0076 | ssl3142  | GO:0046873 | 0.0056 | slr1406  | GO:0043169 | 0.004 | sll10031 | GO:0016829 | 0.0025 | slr2071  | GO:0016051 | 0.0014 |
| slr6031  | GO:0004872 | 0.0076 | slr0092  | GO:0046873 | 0.0056 | sll11495 | GO:0005216 | 0.004 | slr0689  | GO:0016829 | 0.0025 | ssl1263  | GO:0016051 | 0.0014 |
| ssr3341  | GO:0004872 | 0.0076 | slr1923  | GO:0046873 | 0.0056 | slr2004  | GO:0005216 | 0.004 | slr2060  | GO:0016829 | 0.0025 | slr0208  | GO:0016051 | 0.0014 |
| sll1265  | GO:0004872 | 0.0076 | slr1376  | GO:0004872 | 0.0056 | slr0397  | GO:0005216 | 0.004 | sll10069 | GO:0016829 | 0.0025 | slr0442  | GO:0006520 | 0.0014 |
| slr2018  | GO:0016788 | 0.0075 | sll1163  | GO:0046873 | 0.0056 | slr0516  | GO:0005216 | 0.004 | sll11024 | GO:0016829 | 0.0025 | sll11785 | GO:0016051 | 0.0014 |
| sll1119  | GO:0016788 | 0.0075 | slr6049  | GO:0046873 | 0.0056 | sll10749 | GO:0005216 | 0.004 | ssl6061  | GO:0016829 | 0.0025 | ssl1690  | GO:0016051 | 0.0014 |
| sll1749  | GO:0016788 | 0.0075 | sll1355  | GO:0046873 | 0.0056 | sll10294 | GO:0005216 | 0.004 | sll16055 | GO:0016829 | 0.0025 | sll10793 | GO:0016051 | 0.0014 |
| ssr2201  | GO:0016788 | 0.0075 | ssl5007  | GO:0046873 | 0.0056 | slr8022  | GO:0043169 | 0.004 | slr0888  | GO:0016829 | 0.0025 | slr0588  | GO:0016051 | 0.0014 |
| slr0442  | GO:0016788 | 0.0075 | sll5034  | GO:0046873 | 0.0056 | slr6106  | GO:0043169 | 0.004 | ssl2064  | GO:0016829 | 0.0025 | slr5013  | GO:0016051 | 0.0014 |
| sll1902  | GO:0016788 | 0.0075 | ssr6046  | GO:0046873 | 0.0056 | slr7060  | GO:0005216 | 0.004 | sll10625 | GO:0016829 | 0.0025 | sll10310 | GO:0016051 | 0.0014 |
| slr2038  | GO:0016788 | 0.0075 | slr0423  | GO:0004872 | 0.0056 | slr1174  | GO:0005216 | 0.004 | sll10670 | GO:0016829 | 0.0025 | slr1079  | GO:0016051 | 0.0014 |
| sll1775  | GO:0016788 | 0.0075 | sll10274 | GO:0004872 | 0.0056 | sll17086 | GO:0043169 | 0.004 | sll11049 | GO:0016829 | 0.0025 | ssr6099  | GO:0016051 | 0.0014 |
| slr0208  | GO:0016788 | 0.0075 | slr1069  | GO:0046873 | 0.0056 | slr5102  | GO:0043169 | 0.004 | slr7026  | GO:0016829 | 0.0025 | ssr6002  | GO:0016051 | 0.0014 |
| ssr2781  | GO:0016788 | 0.0075 | ssr6032  | GO:0046873 | 0.0056 | slr0582  | GO:0043169 | 0.004 | sll11940 | GO:0016829 | 0.0025 | ssr2553  | GO:0016051 | 0.0014 |
| slr0919  | GO:0016788 | 0.0075 | sll1651  | GO:0046873 | 0.0056 | slr1915  | GO:0043169 | 0.004 | ssr1041  | GO:0016829 | 0.0025 | sll11319 | GO:0016051 | 0.0014 |
| ssr1258  | GO:0016788 | 0.0075 | slr0243  | GO:0004872 | 0.0056 | slr0271  | GO:0005216 | 0.004 | sll11285 | GO:0016829 | 0.0025 | sll11834 | GO:0016051 | 0.0014 |
| slr1565  | GO:0016788 | 0.0075 | slr1168  | GO:0046873 | 0.0056 | sll10625 | GO:0043169 | 0.004 | slr1087  | GO:0016829 | 0.0025 | slr1047  | GO:0006725 | 0.0013 |
| sll10071 | GO:0016788 | 0.0075 | slr0552  | GO:0046873 | 0.0056 | sll15004 | GO:0043169 | 0.004 | sll15003 | GO:0016829 | 0.0025 | ssr1391  | GO:0006725 | 0.0013 |
| ssr0692  | GO:0006807 | 0.0074 | ssl5045  | GO:0046873 | 0.0056 | ssl0788  | GO:0005216 | 0.004 | sll17086 | GO:0016829 | 0.0025 | sll11526 | GO:0006725 | 0.0013 |
| sll1528  | GO:0006807 | 0.0074 | sll1273  | GO:0046873 | 0.0056 | sll10765 | GO:0005216 | 0.004 | slr0812  | GO:0016829 | 0.0025 | slr0514  | GO:0006725 | 0.0013 |
| slr0765  | GO:0006807 | 0.0074 | slr5118  | GO:0046873 | 0.0056 | slr1449  | GO:0043169 | 0.004 | sll11891 | GO:0016829 | 0.0025 | slr0642  | GO:0006886 | 0.0013 |
| ssr3154  | GO:0006807 | 0.0074 | sll10742 | GO:0046873 | 0.0056 | sll10525 | GO:0005216 | 0.004 | sll17070 | GO:0016829 | 0.0025 | sll10783 | GO:0006725 | 0.0013 |
| sll10445 | GO:0016740 | 0.0072 | slr6013  | GO:0046873 | 0.0056 | sll10691 | GO:0043169 | 0.004 | slr6088  | GO:0016829 | 0.0025 | slr1926  | GO:0006725 | 0.0013 |
| sll10641 | GO:0016740 | 0.0072 | slr7095  | GO:0046873 | 0.0056 | slr1623  | GO:0005216 | 0.004 | slr1752  | GO:0016829 | 0.0025 | slr1431  | GO:0016874 | 0.0013 |
| ssl0410  | GO:0006139 | 0.0071 | sll10996 | GO:0004872 | 0.0056 | sll11640 | GO:0005216 | 0.004 | ssl2069  | GO:0016829 | 0.0025 | slr1644  | GO:0016874 | 0.0013 |
| sll10031 | GO:0019538 | 0.0071 | slr0505  | GO:0046873 | 0.0056 | slr0670  | GO:0043169 | 0.004 | ssl2814  | GO:0016829 | 0.0025 | ssr2142  | GO:0016874 | 0.0013 |
| slr0184  | GO:0019538 | 0.0071 | sll15097 | GO:0046873 | 0.0056 | sll11495 | GO:0043169 | 0.004 | slr1450  | GO:0016829 | 0.0025 | slr1052  | GO:0042626 | 0.0013 |
| slr5111  | GO:0006139 | 0.0071 | sll17064 | GO:0046873 | 0.0056 | sll17077 | GO:0043169 | 0.004 | slr1513  | GO:0016829 | 0.0025 | slr1235  | GO:0016788 | 0.0013 |
| slr0273  | GO:0019538 | 0.0071 | sll10743 | GO:0004872 | 0.0056 | ssr0759  | GO:0005216 | 0.004 | slr1174  | GO:0016829 | 0.0025 | sll11527 | GO:0008324 | 0.0013 |
| sll10925 | GO:0006139 | 0.0071 | slr7015  | GO:0046873 | 0.0056 | slr0637  | GO:0005216 | 0.004 | ssl17038 | GO:0016829 | 0.0025 | sll11293 | GO:0016788 | 0.0013 |
| ssr6083  | GO:0019538 | 0.0071 | slr0907  | GO:0046873 | 0.0056 | slr5087  | GO:0005216 | 0.004 | sll10543 | GO:0016829 | 0.0025 | slr0602  | GO:0004518 | 0.0013 |
| ssr2998  | GO:0019538 | 0.0071 | sll10815 | GO:0046873 | 0.0056 | sll10298 | GO:0043169 | 0.004 | sll10157 | GO:0016829 | 0.0025 | slr1385  | GO:0046873 | 0.0013 |
| sll16052 | GO:0019538 | 0.0071 | ssr2554  | GO:0046873 | 0.0056 | sll11531 | GO:0043169 | 0.004 | slr1624  | GO:0016829 | 0.0025 | slr2092  | GO:0046873 | 0.0013 |
| sll15067 | GO:0006139 | 0.0071 | slr6080  | GO:0046873 | 0.0056 | slr1570  | GO:0005216 | 0.004 | sll11681 | GO:0016829 | 0.0025 | slr1699  | GO:0042626 | 0.0013 |
| slr0184  | GO:0006139 | 0.0071 | slr0157  | GO:0004872 | 0.0056 | ssl11552 | GO:0043169 | 0.004 | slr0184  | GO:0016829 | 0.0025 | ssl0750  | GO:0016788 | 0.0013 |
| slr1970  | GO:0006139 | 0.0071 | slr6101  | GO:0046873 | 0.0056 | sll10670 | GO:0043169 | 0.004 | sll11531 | GO:0016829 | 0.0025 | sll10584 | GO:0008324 | 0.0013 |
| slr6071  | GO:0019538 | 0.0071 | slr0333  | GO:0046873 | 0.0056 | sll18019 | GO:0005216 | 0.004 | ssr7079  | GO:0016829 | 0.0025 | slr1235  | GO:0008324 | 0.0013 |
| slr5111  | GO:0019538 | 0.0071 | slr0059  | GO:0046873 | 0.0056 | sll10162 | GO:0005216 | 0.004 | slr5024  | GO:0016829 | 0.0025 | sll11527 | GO:0016788 | 0.0013 |
| slr0656  | GO:0019538 | 0.0071 | slr1260  | GO:0046873 | 0.0056 | ssl17045 | GO:0005216 | 0.004 | sll10608 | GO:0016829 | 0.0025 | sll11858 | GO:0046873 | 0.0013 |
| slr0453  | GO:0019538 | 0.0071 | sll10864 | GO:0004872 | 0.0056 | sll17078 | GO:0005216 | 0.004 | ssr6062  | GO:0016829 | 0.0025 | sll11293 | GO:0008324 | 0.0013 |
| sll10294 | GO:0019538 | 0.0071 | ssr1499  | GO:0046873 | 0.0056 | sll11142 | GO:0043169 | 0.004 | sll11570 | GO:0016829 | 0.0025 | sll10584 | GO:0016788 | 0.0013 |
| slr1911  | GO:0019538 | 0.0071 | slr0503  | GO:0004872 | 0.0056 | ssr1155  | GO:0043169 | 0.004 | slr1163  | GO:0016829 | 0.0025 | sll11477 | GO:0043234 | 0.0013 |
| sll1321  | GO:0006139 | 0.0071 | sll10096 | GO:0004872 | 0.0056 | slr0300  | GO:0043169 | 0.004 | sll10563 | GO:0016829 | 0.0025 | sll12007 | GO:0043234 | 0.0013 |
| ssl1300  | GO:0019538 | 0.0071 | slr1223  | GO:0046873 | 0.0056 | slr6016  | GO:0043169 | 0.004 | slr7100  | GO:0016829 | 0.0025 | slr1603  | GO:0043234 | 0.0013 |
| ssr7093  | GO:0006139 | 0.0071 | slr1900  | GO:0004872 | 0.0056 | slr6044  | GO:0005216 | 0.004 | ssl2384  | GO:0016829 | 0.0025 | slr0765  | GO:0043234 | 0.0013 |
| ssl15103 | GO:0006139 | 0.0071 | sll11542 | GO:0004872 | 0.0056 | ssl17039 | GO:0043169 | 0.004 | sll11036 | GO:0016829 | 0.0025 | sll10661 | GO:0043234 | 0.0013 |
| ssr0336  | GO:0019538 | 0.0071 | slr6100  | GO:0046873 | 0.0056 | slr0509  | GO:0043169 | 0.004 | sll11834 | GO:0016829 | 0.0025 | sll11528 | GO:0043234 | 0.0013 |
| slr6033  | GO:0019538 | 0.0071 | sll11939 | GO:0046873 | 0.0056 | slr0813  | GO:0005216 | 0.004 | ssl10410 | GO:0016829 | 0.0025 | sll10804 | GO:0043234 | 0.0013 |
| ssr1768  | GO:0019538 | 0.0071 | sll10156 | GO:0030001 | 0.0055 | sll17090 | GO:0005216 | 0.004 | slr0575  | GO:0016829 | 0.0025 | ssl11255 | GO:0043234 | 0.0013 |
| sll17078 | GO:0019538 | 0.0071 | sll10359 | GO:0030001 | 0.0055 | slr1627  | GO:0005216 | 0.004 | sll10405 | GO:0016829 | 0.0025 | ssr2843  | GO:0043234 | 0.0013 |
| sll11036 | GO:0006139 | 0.0071 | slr0801  | GO:0030001 | 0.0055 | slr7057  | GO:0043169 | 0.004 | slr0181  | GO:0016829 | 0.0025 | sll11214 | GO:0043234 | 0.0013 |



|          |            |        |          |            |        |          |            |       |          |            |        |          |            |        |
|----------|------------|--------|----------|------------|--------|----------|------------|-------|----------|------------|--------|----------|------------|--------|
| slr0397  | G0:0019538 | 0.0071 | slr1169  | G0:0030001 | 0.0055 | sl110335 | G0:0043169 | 0.004 | sl110044 | G0:0016829 | 0.0025 | ssr0692  | G0:0043234 | 0.0013 |
| sl110157 | G0:0019538 | 0.0071 | slr0060  | G0:0030001 | 0.0055 | ssr2067  | G0:0043169 | 0.004 | sl110678 | G0:0016829 | 0.0025 | slr1774  | G0:0043234 | 0.0013 |
| ssr0657  | G0:0006139 | 0.0071 | sl111512 | G0:0030001 | 0.0055 | slr0613  | G0:0005216 | 0.004 | ss17048  | G0:0016829 | 0.0025 | slr1385  | G0:0043234 | 0.0013 |
| sl11583  | G0:0019538 | 0.0071 | sl110412 | G0:0030001 | 0.0055 | ssr2802  | G0:0043169 | 0.004 | sl111717 | G0:0016829 | 0.0025 | slr0366  | G0:0043234 | 0.0013 |
| ssr6078  | G0:0006139 | 0.0071 | sl110588 | G0:0030001 | 0.0055 | ss15103  | G0:0005216 | 0.004 | sl111698 | G0:0016829 | 0.0025 | slr0108  | G0:0043234 | 0.0013 |
| slr0728  | G0:0006139 | 0.0071 | sl111541 | G0:0030001 | 0.0055 | slr0238  | G0:0005216 | 0.004 | sl110696 | G0:0016829 | 0.0025 | slr0889  | G0:0043234 | 0.0013 |
| sl110858 | G0:0019538 | 0.0071 | slr7024  | G0:0030001 | 0.0055 | slr0645  | G0:0043169 | 0.004 | sl111911 | G0:0016829 | 0.0025 | sl111737 | G0:0043234 | 0.0013 |
| slr6016  | G0:0019538 | 0.0071 | sl110225 | G0:0030001 | 0.0055 | ssr6099  | G0:0043169 | 0.004 | slr5073  | G0:0016829 | 0.0025 | sl110898 | G0:0043234 | 0.0013 |
| ss17039  | G0:0019538 | 0.0071 | slr1074  | G0:0030001 | 0.0055 | slr1442  | G0:0043169 | 0.004 | sl111151 | G0:0016829 | 0.0025 | slr2092  | G0:0043234 | 0.0013 |
| sl111024 | G0:0019538 | 0.0071 | sl110837 | G0:0030001 | 0.0055 | slr1425  | G0:0005216 | 0.004 | slr0948  | G0:0016829 | 0.0025 | slr0642  | G0:0043234 | 0.0013 |
| ssr1041  | G0:0019538 | 0.0071 | slr11122 | G0:0030001 | 0.0055 | sl115063 | G0:0005216 | 0.004 | slr0730  | G0:0016829 | 0.0025 | ssr2142  | G0:0019538 | 0.0012 |
| ss12069  | G0:0019538 | 0.0071 | slr0483  | G0:0030001 | 0.0055 | ss17038  | G0:0043169 | 0.004 | slr0863  | G0:0016829 | 0.0025 | slr1052  | G0:0015031 | 0.0012 |
| slr0269  | G0:0019538 | 0.0071 | ssr1114  | G0:0046873 | 0.0055 | ss10410  | G0:0043169 | 0.004 | slr5111  | G0:0016829 | 0.0025 | slr0818  | G0:0006790 | 0.0012 |
| slr6029  | G0:0019538 | 0.0071 | sl110843 | G0:0046873 | 0.0055 | ssr6083  | G0:0005216 | 0.004 | slr5012  | G0:0016829 | 0.0025 | slr1591  | G0:0006790 | 0.0012 |
| slr7094  | G0:0006139 | 0.0071 | slr0112  | G0:0046873 | 0.0055 | sl110858 | G0:0043169 | 0.004 | sl110858 | G0:0016829 | 0.0025 | sl110446 | G0:0006790 | 0.0012 |
| slr6068  | G0:0006139 | 0.0071 | slr0887  | G0:0046873 | 0.0055 | ssr2972  | G0:0043169 | 0.004 | sl110496 | G0:0016829 | 0.0025 | slr1773  | G0:0004872 | 0.0012 |
| slr1450  | G0:0019538 | 0.0071 | sl111241 | G0:0046873 | 0.0055 | slr1474  | G0:0043169 | 0.004 | ss10350  | G0:0016829 | 0.0025 | slr0765  | G0:0004872 | 0.0012 |
| sl115063 | G0:0006139 | 0.0071 | slr1240  | G0:0046873 | 0.0055 | slr2071  | G0:0005216 | 0.004 | sl111643 | G0:0043234 | 0.0025 | sl110446 | G0:0004872 | 0.0012 |
| ss10350  | G0:0019538 | 0.0071 | slr1658  | G0:0046873 | 0.0055 | ssr2711  | G0:0005216 | 0.004 | slr0589  | G0:0043234 | 0.0025 | sl110488 | G0:0016874 | 0.0012 |
| sl17090  | G0:0019538 | 0.0071 | sl111267 | G0:0046873 | 0.0055 | sl110044 | G0:0043169 | 0.004 | sl110577 | G0:0043234 | 0.0025 | slr0108  | G0:0004872 | 0.0012 |
| ssr5092  | G0:0006139 | 0.0071 | sl110827 | G0:0046873 | 0.0055 | slr0667  | G0:0005216 | 0.004 | slr0909  | G0:0043234 | 0.0025 | sl110445 | G0:0016874 | 0.0012 |
| slr5013  | G0:0019538 | 0.0071 | sl111950 | G0:0046873 | 0.0055 | ss11690  | G0:0005216 | 0.004 | sl110183 | G0:0043234 | 0.0025 | slr0147  | G0:0004872 | 0.0012 |
| sl12011  | G0:0019538 | 0.0071 | slr0455  | G0:0046873 | 0.0055 | sl110496 | G0:0043169 | 0.004 | slr0607  | G0:0043234 | 0.0025 | ssr0692  | G0:0004872 | 0.0012 |
| sl111131 | G0:0019538 | 0.0071 | sl111304 | G0:0046873 | 0.0055 | sl110793 | G0:0005216 | 0.004 | slr2037  | G0:0043234 | 0.0025 | slr2003  | G0:0044249 | 0.0011 |
| sl115063 | G0:0019538 | 0.0071 | ssr1552  | G0:0046873 | 0.0055 | sl115089 | G0:0005216 | 0.004 | slr0594  | G0:0043234 | 0.0025 | slr1570  | G0:0044249 | 0.0011 |
| slr0976  | G0:0019538 | 0.0071 | sl110564 | G0:0046873 | 0.0055 | ss15113  | G0:0005216 | 0.004 | slr1906  | G0:0043234 | 0.0025 | slr0519  | G0:0006725 | 0.0011 |
| ss15025  | G0:0006139 | 0.0071 | slr1636  | G0:0016820 | 0.0055 | slr1935  | G0:0005216 | 0.004 | sl110732 | G0:0043234 | 0.0025 | sl110898 | G0:0006730 | 0.0011 |
| sl11702  | G0:0019538 | 0.0071 | slr1338  | G0:0046873 | 0.0055 | sl111307 | G0:0043169 | 0.004 | slr1959  | G0:0043234 | 0.0025 | ssr5074  | G0:0044249 | 0.0011 |
| slr0976  | G0:0006139 | 0.0071 | slr0935  | G0:0046873 | 0.0055 | slr1394  | G0:0005216 | 0.004 | slr1847  | G0:0043234 | 0.0025 | slr1737  | G0:0044249 | 0.0011 |
| ss12064  | G0:0019538 | 0.0071 | sl110268 | G0:0046873 | 0.0055 | sl110765 | G0:0043169 | 0.004 | sl110361 | G0:0043234 | 0.0025 | slr2111  | G0:0006725 | 0.0011 |
| ss11378  | G0:0019538 | 0.0071 | slr1415  | G0:0046873 | 0.0055 | ss17051  | G0:0005216 | 0.004 | slr1307  | G0:0043234 | 0.0025 | slr5053  | G0:0044249 | 0.0011 |
| sl110479 | G0:0019538 | 0.0071 | sl111582 | G0:0046873 | 0.0055 | sl110376 | G0:0005216 | 0.004 | slr1800  | G0:0043234 | 0.0025 | slr7102  | G0:0044249 | 0.0011 |
| slr1704  | G0:0006139 | 0.0071 | slr1812  | G0:0016820 | 0.0055 | slr1911  | G0:0043169 | 0.004 | sl111562 | G0:0043234 | 0.0025 | slr1593  | G0:0006725 | 0.0011 |
| slr5112  | G0:0006139 | 0.0071 | slr1544  | G0:0046873 | 0.0055 | slr0109  | G0:0005216 | 0.004 | slr0263  | G0:0043234 | 0.0025 | sl111911 | G0:0044249 | 0.0011 |
| sl11531  | G0:0019538 | 0.0071 | sl110981 | G0:0046873 | 0.0055 | slr5037  | G0:0005216 | 0.004 | slr1851  | G0:0043234 | 0.0025 | slr1177  | G0:0006725 | 0.0011 |
| slr1670  | G0:0019538 | 0.0071 | sl111372 | G0:0046873 | 0.0055 | sl111192 | G0:0005216 | 0.004 | slr1811  | G0:0043234 | 0.0025 | slr1236  | G0:0044249 | 0.0011 |
| ss17021  | G0:0006139 | 0.0071 | sl111350 | G0:0046873 | 0.0055 | slr5013  | G0:0005216 | 0.004 | sl111611 | G0:0043234 | 0.0025 | slr0517  | G0:0044249 | 0.0011 |
| sl11495  | G0:0019538 | 0.0071 | sl110995 | G0:0046873 | 0.0055 | slr6028  | G0:0005216 | 0.004 | sl110208 | G0:0043234 | 0.0025 | sl111784 | G0:0044249 | 0.0011 |
| sl118001 | G0:0019538 | 0.0071 | slr0596  | G0:0046873 | 0.0055 | sl111068 | G0:0043169 | 0.004 | slr0740  | G0:0043234 | 0.0025 | ss17045  | G0:0044249 | 0.0011 |
| slr1681  | G0:0019538 | 0.0071 | slr0975  | G0:0046873 | 0.0055 | ss12814  | G0:0005216 | 0.004 | slr0990  | G0:0043234 | 0.0025 | slr0637  | G0:0044249 | 0.0011 |
| slr6081  | G0:0006139 | 0.0071 | slr0729  | G0:0046873 | 0.0055 | sl110298 | G0:0005216 | 0.004 | slr1726  | G0:0043234 | 0.0025 | ssr6030  | G0:0044249 | 0.0011 |
| sl11095  | G0:0019538 | 0.0071 | slr1862  | G0:0046873 | 0.0055 | slr2103  | G0:0043169 | 0.004 | slr1855  | G0:0043234 | 0.0025 | ssr0109  | G0:0044249 | 0.0011 |
| sl17087  | G0:0019538 | 0.0071 | slr1852  | G0:0046873 | 0.0055 | ss17045  | G0:0043169 | 0.004 | sl110192 | G0:0043234 | 0.0025 | slr1915  | G0:0044249 | 0.0011 |
| sl110335 | G0:0006139 | 0.0071 | slr1070  | G0:0046873 | 0.0055 | slr6045  | G0:0005216 | 0.004 | slr0243  | G0:0044238 | 0.0024 | sl111915 | G0:0044249 | 0.0011 |
| sl115089 | G0:0019538 | 0.0071 | sl110888 | G0:0046873 | 0.0055 | sl111979 | G0:0043169 | 0.004 | sl111355 | G0:0016070 | 0.0024 | ss10788  | G0:0044249 | 0.0011 |
| slr0300  | G0:0019538 | 0.0071 | slr1647  | G0:0046873 | 0.0055 | sl117086 | G0:0005216 | 0.004 | sl110436 | G0:0009116 | 0.0024 | sl110060 | G0:0044249 | 0.0011 |
| slr1236  | G0:0006139 | 0.0071 | ssr3300  | G0:0046873 | 0.0055 | ss15091  | G0:0005216 | 0.004 | sl110872 | G0:0016070 | 0.0024 | slr0144  | G0:0006725 | 0.0011 |
| slr1406  | G0:0019538 | 0.0071 | sl110147 | G0:0046873 | 0.0055 | ssr6002  | G0:0043169 | 0.004 | slr1363  | G0:0009116 | 0.0024 | sl117090 | G0:0044249 | 0.0011 |
| slr1789  | G0:0006139 | 0.0071 | sl111411 | G0:0046873 | 0.0055 | sl110543 | G0:0043169 | 0.004 | sl111913 | G0:0044238 | 0.0024 | slr0645  | G0:0044249 | 0.0011 |
| sl110847 | G0:0019538 | 0.0071 | sl110909 | G0:0046873 | 0.0055 | slr0651  | G0:0005216 | 0.004 | slr1958  | G0:0016070 | 0.0024 | sl110355 | G0:0006725 | 0.0011 |
| slr2117  | G0:0019538 | 0.0071 | slr1258  | G0:0046873 | 0.0055 | ssr7093  | G0:0005216 | 0.004 | slr2032  | G0:0009116 | 0.0024 | slr0184  | G0:0044249 | 0.0011 |
| sl11233  | G0:0006139 | 0.0071 | sl111173 | G0:0004872 | 0.0053 | sl115003 | G0:0005216 | 0.004 | sl110932 | G0:0016070 | 0.0024 | sl111191 | G0:0044249 | 0.0011 |
| sl115003 | G0:0019538 | 0.0071 | sl110319 | G0:0004872 | 0.0053 | slr1951  | G0:0043169 | 0.004 | slr1260  | G0:0016070 | 0.0024 | sl111630 | G0:0006725 | 0.0011 |
| slr0273  | G0:0006139 | 0.0071 | ssr3300  | G0:0004872 | 0.0053 | sl110098 | G0:0043169 | 0.004 | slr1667  | G0:0016051 | 0.0024 | sl111321 | G0:0044249 | 0.0011 |

|          |            |        |          |            |        |          |            |       |          |            |        |          |            |        |
|----------|------------|--------|----------|------------|--------|----------|------------|-------|----------|------------|--------|----------|------------|--------|
| ssl2069  | G0:0006139 | 0.0071 | slr1493  | G0:0004872 | 0.0053 | slr2027  | G0:0043169 | 0.004 | slr0876  | G0:0044238 | 0.0024 | sl11608  | G0:0006725 | 0.0011 |
| sl10069  | G0:0019538 | 0.0071 | slr0272  | G0:0004872 | 0.0053 | sl11692  | G0:0005216 | 0.004 | sl11949  | G0:0016051 | 0.0024 | slr0241  | G0:0044249 | 0.0011 |
| sl10162  | G0:0019538 | 0.0071 | sl110995 | G0:0004872 | 0.0053 | ssr1473  | G0:0005216 | 0.004 | ss12245  | G0:0009116 | 0.0024 | ssr1473  | G0:0044249 | 0.0011 |
| slr5101  | G0:0006139 | 0.0071 | slr7024  | G0:0004872 | 0.0053 | slr0326  | G0:0043169 | 0.004 | slr0921  | G0:0016051 | 0.0024 | slr1681  | G0:0044249 | 0.0011 |
| slr0637  | G0:0019538 | 0.0071 | ssr1528  | G0:0004872 | 0.0053 | slr6051  | G0:0005216 | 0.004 | sl11608  | G0:0016051 | 0.0024 | ssr2711  | G0:0044249 | 0.0011 |
| ssr1155  | G0:0006139 | 0.0071 | sl11372  | G0:0004872 | 0.0053 | sl11573  | G0:0005216 | 0.004 | sl11247  | G0:0044238 | 0.0024 | sl11307  | G0:0044249 | 0.0011 |
| sl11570  | G0:0019538 | 0.0071 | sl110141 | G0:0004872 | 0.0053 | sl10984  | G0:0043169 | 0.004 | sl110102 | G0:0009116 | 0.0024 | ssr1558  | G0:0044249 | 0.0011 |
| slr6091  | G0:0006139 | 0.0071 | slr1647  | G0:0004872 | 0.0053 | slr0241  | G0:0043169 | 0.004 | sl112015 | G0:0009116 | 0.0024 | slr1079  | G0:0044249 | 0.0011 |
| slr8021  | G0:0006139 | 0.0071 | slr0975  | G0:0004872 | 0.0053 | ssr2975  | G0:0043169 | 0.004 | sl110296 | G0:0044238 | 0.0024 | ssr0692  | G0:0006730 | 0.0011 |
| slr6068  | G0:0019538 | 0.0071 | sl110737 | G0:0004872 | 0.0053 | slr1406  | G0:0005216 | 0.004 | sl110400 | G0:0009116 | 0.0024 | ssr7079  | G0:0044249 | 0.0011 |
| slr0725  | G0:0019538 | 0.0071 | slr1152  | G0:0004872 | 0.0053 | slr1970  | G0:0043169 | 0.004 | ss15007  | G0:0009116 | 0.0024 | sl117050 | G0:0044249 | 0.0011 |
| slr5101  | G0:0019538 | 0.0071 | sl11350  | G0:0004872 | 0.0053 | ss16061  | G0:0043169 | 0.004 | slr0890  | G0:0009116 | 0.0024 | sl110925 | G0:0044249 | 0.0011 |
| sl110172 | G0:0019538 | 0.0071 | ssr1552  | G0:0004872 | 0.0053 | slr0453  | G0:0005216 | 0.004 | slr0333  | G0:0016070 | 0.0024 | ssr2047  | G0:0044249 | 0.0011 |
| sl110678 | G0:0019538 | 0.0071 | slr1862  | G0:0004872 | 0.0053 | slr8021  | G0:0043169 | 0.004 | slr1468  | G0:0009116 | 0.0024 | slr0725  | G0:0044249 | 0.0011 |
| sl110230 | G0:0019538 | 0.0071 | slr1415  | G0:0004872 | 0.0053 | slr1327  | G0:0043169 | 0.004 | sl110497 | G0:0016051 | 0.0024 | sl110442 | G0:0044249 | 0.0011 |
| sl110765 | G0:0006139 | 0.0071 | sl110189 | G0:0004872 | 0.0053 | ss17074  | G0:0005216 | 0.004 | sl115033 | G0:0009116 | 0.0024 | sl11613  | G0:0006725 | 0.0011 |
| ssr0336  | G0:0006139 | 0.0071 | sl11225  | G0:0004872 | 0.0053 | slr0771  | G0:0005216 | 0.004 | sl117064 | G0:0009116 | 0.0024 | slr1816  | G0:0044249 | 0.0011 |
| slr6071  | G0:0006139 | 0.0071 | sl110602 | G0:0004872 | 0.0053 | sl117006 | G0:0005216 | 0.004 | slr0304  | G0:0044238 | 0.0024 | slr1932  | G0:0006725 | 0.0011 |
| sl117030 | G0:0019538 | 0.0071 | slr0249  | G0:0004872 | 0.0053 | sl11898  | G0:0005216 | 0.004 | sl110804 | G0:0005976 | 0.0024 | ss12807  | G0:0006725 | 0.0011 |
| slr0755  | G0:0006139 | 0.0071 | slr1590  | G0:0004872 | 0.0053 | slr0976  | G0:0043169 | 0.004 | slr6072  | G0:0016070 | 0.0024 | ss16035  | G0:0044249 | 0.0011 |
| slr6104  | G0:0019538 | 0.0071 | sl11505  | G0:0004872 | 0.0053 | sl110047 | G0:0005216 | 0.004 | slr1702  | G0:0005976 | 0.0024 | sl110405 | G0:0044249 | 0.0011 |
| slr6087  | G0:0006139 | 0.0071 | slr1977  | G0:0004872 | 0.0053 | sl110749 | G0:0043169 | 0.004 | sl110481 | G0:0016070 | 0.0024 | sl111106 | G0:0044249 | 0.0011 |
| ssl1552  | G0:0019538 | 0.0071 | sl11399  | G0:0004872 | 0.0053 | slr7060  | G0:0043169 | 0.004 | slr6080  | G0:0016070 | 0.0024 | slr2049  | G0:0044249 | 0.0011 |
| sl11151  | G0:0019538 | 0.0071 | slr0957  | G0:0004872 | 0.0053 | slr6009  | G0:0043169 | 0.004 | slr7058  | G0:0009116 | 0.0024 | sl110253 | G0:0044249 | 0.0011 |
| ssr2802  | G0:0019538 | 0.0071 | ss18008  | G0:0004872 | 0.0053 | slr1438  | G0:0005216 | 0.004 | sl110676 | G0:0016051 | 0.0024 | sl115063 | G0:0044249 | 0.0011 |
| slr0755  | G0:0019538 | 0.0071 | slr1062  | G0:0004872 | 0.0053 | ss12162  | G0:0043169 | 0.004 | sl111797 | G0:0009116 | 0.0024 | sl110350 | G0:0044267 | 0.0011 |
| sl15067  | G0:0019538 | 0.0071 | sl110281 | G0:0004872 | 0.0053 | sl111702 | G0:0005216 | 0.004 | ssr6085  | G0:0016070 | 0.0024 | ss11552  | G0:0044249 | 0.0011 |
| ssl1300  | G0:0006139 | 0.0071 | slr1809  | G0:0004872 | 0.0053 | ss15091  | G0:0043169 | 0.004 | sl110982 | G0:0016051 | 0.0024 | sl111095 | G0:0044249 | 0.0011 |
| slr0712  | G0:0006139 | 0.0071 | sl110585 | G0:0004872 | 0.0053 | slr1807  | G0:0005216 | 0.004 | slr1273  | G0:0016070 | 0.0024 | ss18039  | G0:0044249 | 0.0011 |
| sl117034 | G0:0006139 | 0.0071 | slr1613  | G0:0004872 | 0.0053 | sl112011 | G0:0043169 | 0.004 | sl110309 | G0:0016051 | 0.0024 | sl110931 | G0:0016788 | 0.0011 |
| slr0610  | G0:0006139 | 0.0071 | sl110843 | G0:0004872 | 0.0053 | slr7100  | G0:0005216 | 0.004 | ss15031  | G0:0016070 | 0.0024 | slr0366  | G0:0016051 | 0.001  |
| slr5016  | G0:0019538 | 0.0071 | sl110410 | G0:0004872 | 0.0053 | ss12595  | G0:0005216 | 0.004 | sl111455 | G0:0044238 | 0.0024 | slr1215  | G0:0006139 | 0.001  |
| sl111891 | G0:0019538 | 0.0071 | slr1240  | G0:0004872 | 0.0053 | ssr0109  | G0:0005216 | 0.004 | slr0287  | G0:0044238 | 0.0024 | sl110804 | G0:0016051 | 0.001  |
| sl110749 | G0:0019538 | 0.0071 | slr1209  | G0:0004872 | 0.0053 | slr0731  | G0:0005216 | 0.004 | sl111764 | G0:0009116 | 0.0024 | sl111858 | G0:0016051 | 0.001  |
| slr0516  | G0:0019538 | 0.0071 | sl110590 | G0:0004872 | 0.0053 | slr0416  | G0:0043169 | 0.004 | sl110996 | G0:0044238 | 0.0024 | slr0818  | G0:0044238 | 0.001  |
| sl111164 | G0:0019538 | 0.0071 | slr0554  | G0:0004872 | 0.0053 | slr1142  | G0:0043169 | 0.004 | slr1638  | G0:0016051 | 0.0024 | sl110584 | G0:0044249 | 0.001  |
| slr5077  | G0:0019538 | 0.0071 | sl11873  | G0:0004872 | 0.0053 | ssr1425  | G0:0005216 | 0.004 | slr0601  | G0:0009116 | 0.0024 | sl110898 | G0:0044238 | 0.001  |
| slr0948  | G0:0006139 | 0.0071 | slr1053  | G0:0004872 | 0.0053 | ssr6089  | G0:0005216 | 0.004 | slr5017  | G0:0009116 | 0.0024 | sl111477 | G0:0043169 | 0.001  |
| sl110678 | G0:0006139 | 0.0071 | sl111071 | G0:0004872 | 0.0053 | sl117050 | G0:0043169 | 0.004 | slr1534  | G0:0016070 | 0.0024 | slr0108  | G0:0043169 | 0.001  |
| slr0587  | G0:0006139 | 0.0071 | sl111737 | G0:0008299 | 0.0052 | slr0217  | G0:0005216 | 0.004 | sl110237 | G0:0016051 | 0.0024 | sl110252 | G0:0016772 | 0.001  |
| slr6045  | G0:0019538 | 0.0071 | slr0366  | G0:0008299 | 0.0052 | slr5126  | G0:0005216 | 0.004 | slr1391  | G0:0044238 | 0.0024 | sl110804 | G0:0016070 | 0.0009 |
| slr1142  | G0:0006139 | 0.0071 | slr0491  | G0:0016810 | 0.0052 | slr1236  | G0:0005216 | 0.004 | slr1612  | G0:0044238 | 0.0024 | sl111446 | G0:0005976 | 0.0009 |
| sl110376 | G0:0006139 | 0.0071 | sl110788 | G0:0004872 | 0.0052 | sl117087 | G0:0043169 | 0.004 | slr6005  | G0:0016070 | 0.0024 | slr1591  | G0:0005976 | 0.0009 |
| slr0885  | G0:0006139 | 0.0071 | slr1811  | G0:0004872 | 0.0052 | sl110162 | G0:0043169 | 0.004 | sl110283 | G0:0044238 | 0.0024 | slr0366  | G0:0009116 | 0.0009 |
| ssr5011  | G0:0019538 | 0.0071 | ssr2049  | G0:0016810 | 0.0052 | slr0610  | G0:0005216 | 0.004 | slr1195  | G0:0016070 | 0.0024 | slr1235  | G0:0006629 | 0.0009 |
| ssl17048 | G0:0006139 | 0.0071 | ssl1255  | G0:0016810 | 0.0052 | ssr6099  | G0:0005216 | 0.004 | slr0871  | G0:0044238 | 0.0024 | ss10294  | G0:0006629 | 0.0009 |
| sl110249 | G0:0019538 | 0.0071 | slr1047  | G0:0004872 | 0.0052 | sl117090 | G0:0043169 | 0.004 | slr1576  | G0:0009116 | 0.0024 | slr1052  | G0:0006164 | 0.0009 |
| slr6012  | G0:0006139 | 0.0071 | slr2092  | G0:0016810 | 0.0052 | sl111052 | G0:0005216 | 0.004 | slr7058  | G0:0016070 | 0.0024 | sl110661 | G0:0009116 | 0.0009 |
| sl111911 | G0:0006139 | 0.0071 | sl110558 | G0:0004872 | 0.0052 | sl111131 | G0:0043169 | 0.004 | slr1676  | G0:0016051 | 0.0024 | sl110735 | G0:0005976 | 0.0009 |
| ssl2814  | G0:0006139 | 0.0071 | sl110192 | G0:0004872 | 0.0052 | slr6091  | G0:0005216 | 0.004 | sl110886 | G0:0009116 | 0.0024 | sl111527 | G0:0006629 | 0.0009 |
| sl117033 | G0:0019538 | 0.0071 | slr1702  | G0:0016810 | 0.0052 | sl111024 | G0:0043169 | 0.004 | slr1218  | G0:0016070 | 0.0024 | slr1215  | G0:0008324 | 0.0009 |
| slr0291  | G0:0006139 | 0.0071 | sl110783 | G0:0004872 | 0.0052 | slr5077  | G0:0005216 | 0.004 | slr0299  | G0:0044238 | 0.0024 | sl110488 | G0:0008233 | 0.0009 |
| slr1780  | G0:0006139 | 0.0071 | slr0609  | G0:0004872 | 0.0052 | sl118027 | G0:0005216 | 0.004 | sl111219 | G0:0044238 | 0.0024 | ssr1473  | G0:0043234 | 0.0009 |
| slr0238  | G0:0006139 | 0.0071 | ssl2733  | G0:0004872 | 0.0052 | slr0082  | G0:0043169 | 0.004 | ssl11792 | G0:0009116 | 0.0024 | ssr6002  | G0:0043234 | 0.0009 |

|         |            |        |         |            |        |         |            |       |         |            |        |         |            |        |
|---------|------------|--------|---------|------------|--------|---------|------------|-------|---------|------------|--------|---------|------------|--------|
| ss15064 | GO:0019538 | 0.0071 | slr0740 | GO:0004872 | 0.0052 | slr5112 | GO:0005216 | 0.004 | slr0489 | GO:0016070 | 0.0024 | slr0291 | GO:0043234 | 0.0009 |
| slr0967 | GO:0006139 | 0.0071 | s111737 | GO:0016810 | 0.0052 | slr0725 | GO:0043169 | 0.004 | slr7012 | GO:0016070 | 0.0024 | slr0325 | GO:0043234 | 0.0009 |
| slr0013 | GO:0019538 | 0.0071 | s110910 | GO:0004872 | 0.0052 | ssr0336 | GO:0043169 | 0.004 | slr0919 | GO:0016070 | 0.0024 | slr1507 | GO:0043234 | 0.0009 |
| s111158 | GO:0019538 | 0.0071 | s110022 | GO:0004872 | 0.0052 | ssr2060 | GO:0043169 | 0.004 | slr1674 | GO:0044238 | 0.0024 | slr1241 | GO:0043234 | 0.0009 |
| s110543 | GO:0019538 | 0.0071 | s110175 | GO:0004872 | 0.0052 | s118001 | GO:0043169 | 0.004 | slr0480 | GO:0044238 | 0.0024 | ssr7035 | GO:0043234 | 0.0009 |
| ss18028 | GO:0019538 | 0.0071 | slr0909 | GO:0004872 | 0.0052 | slr0271 | GO:0043169 | 0.004 | s115006 | GO:0016070 | 0.0024 | slr0575 | GO:0043234 | 0.0009 |
| slr5053 | GO:0006139 | 0.0071 | s112007 | GO:0015031 | 0.0051 | s111381 | GO:0005216 | 0.004 | ssr3409 | GO:0016070 | 0.0024 | ss15114 | GO:0043234 | 0.0009 |
| ssr2047 | GO:0006139 | 0.0071 | s110310 | GO:0006629 | 0.0051 | slr1170 | GO:0005216 | 0.004 | ss11520 | GO:0009116 | 0.0024 | slr1789 | GO:0043234 | 0.0009 |
| s110253 | GO:0006139 | 0.0071 | slr1495 | GO:0006629 | 0.0051 | slr0625 | GO:0043169 | 0.004 | slr0971 | GO:0016070 | 0.0024 | slr0184 | GO:0043234 | 0.0009 |
| s117031 | GO:0019538 | 0.0071 | slr0919 | GO:0008299 | 0.0051 | s110253 | GO:0043169 | 0.004 | s110481 | GO:0009116 | 0.0024 | s110793 | GO:0043234 | 0.0009 |
| slr2003 | GO:0006139 | 0.0071 | s111902 | GO:0008299 | 0.0051 | ssr5011 | GO:0043169 | 0.004 | slr0482 | GO:0016051 | 0.0024 | s116055 | GO:0043234 | 0.0009 |
| s111158 | GO:0006139 | 0.0071 | ssr2781 | GO:0006629 | 0.0051 | slr8044 | GO:0043169 | 0.004 | ss10738 | GO:0009116 | 0.0024 | slr1570 | GO:0043234 | 0.0009 |
| slr5024 | GO:0006139 | 0.0071 | slr1702 | GO:0015031 | 0.0051 | slr0416 | GO:0005216 | 0.004 | s110360 | GO:0044238 | 0.0024 | s111531 | GO:0043234 | 0.0009 |
| slr0613 | GO:0019538 | 0.0071 | slr0579 | GO:0006629 | 0.0051 | s110101 | GO:0005216 | 0.004 | slr1572 | GO:0016051 | 0.0024 | ss17038 | GO:0043234 | 0.0009 |
| s117055 | GO:0019538 | 0.0071 | slr0442 | GO:0008299 | 0.0051 | s111373 | GO:0005216 | 0.004 | s117062 | GO:0009116 | 0.0024 | s110482 | GO:0043234 | 0.0009 |
| slr1951 | GO:0006139 | 0.0071 | slr1495 | GO:0008299 | 0.0051 | ssr7017 | GO:0005216 | 0.004 | slr1081 | GO:0016051 | 0.0024 | slr0651 | GO:0043234 | 0.0009 |
| ssr5106 | GO:0006139 | 0.0071 | s110238 | GO:0008299 | 0.0051 | slr0865 | GO:0005216 | 0.004 | slr1068 | GO:0009116 | 0.0024 | s110098 | GO:0043234 | 0.0009 |
| s117050 | GO:0019538 | 0.0071 | slr1032 | GO:0006629 | 0.0051 | ssr3570 | GO:0005216 | 0.004 | s110505 | GO:0030001 | 0.0024 | slr6012 | GO:0043234 | 0.0009 |
| slr0509 | GO:0006139 | 0.0071 | s110328 | GO:0043169 | 0.0051 | s110847 | GO:0005216 | 0.004 | slr0400 | GO:0009116 | 0.0024 | s117029 | GO:0043234 | 0.0009 |
| slr7073 | GO:0019538 | 0.0071 | s111109 | GO:0043169 | 0.0051 | slr1980 | GO:0043169 | 0.004 | s110615 | GO:0044238 | 0.0024 | slr1170 | GO:0043234 | 0.0009 |
| s111570 | GO:0006139 | 0.0071 | slr0440 | GO:0043169 | 0.0051 | s117087 | GO:0005216 | 0.004 | s110547 | GO:0044238 | 0.0024 | ssr0657 | GO:0043234 | 0.0009 |
| ss15113 | GO:0019538 | 0.0071 | s110595 | GO:0043169 | 0.0051 | s111570 | GO:0043169 | 0.004 | slr1262 | GO:0016051 | 0.0024 | ssr5121 | GO:0043234 | 0.0009 |
| ss17022 | GO:0019538 | 0.0071 | slr1863 | GO:0043169 | 0.0051 | s110172 | GO:0043169 | 0.004 | s110274 | GO:0044238 | 0.0024 | s118001 | GO:0043234 | 0.0009 |
| s111609 | GO:0006139 | 0.0071 | slr1813 | GO:0043169 | 0.0051 | s115067 | GO:0005216 | 0.004 | s118033 | GO:0016070 | 0.0024 | slr0709 | GO:0043234 | 0.0009 |
| s111188 | GO:0006139 | 0.0071 | slr0355 | GO:0043169 | 0.0051 | slr0709 | GO:0005216 | 0.004 | slr1353 | GO:0044238 | 0.0024 | s111233 | GO:0043234 | 0.0009 |
| s111476 | GO:0019538 | 0.0071 | slr1116 | GO:0043169 | 0.0051 | slr1875 | GO:0043169 | 0.004 | slr1127 | GO:0044238 | 0.0024 | ss12162 | GO:0043234 | 0.0009 |
| ss11690 | GO:0006139 | 0.0071 | slr1957 | GO:0043169 | 0.0051 | s118040 | GO:0043169 | 0.004 | s110310 | GO:0016070 | 0.0024 | slr2110 | GO:0043234 | 0.0009 |
| slr0670 | GO:0006139 | 0.0071 | slr7080 | GO:0043169 | 0.0051 | slr7100 | GO:0043169 | 0.004 | s111424 | GO:0016070 | 0.0024 | ss18028 | GO:0043234 | 0.0009 |
| s118035 | GO:0019538 | 0.0071 | slr1419 | GO:0043169 | 0.0051 | s111940 | GO:0005216 | 0.004 | s111880 | GO:0016070 | 0.0024 | slr1807 | GO:0043234 | 0.0009 |
| slr1173 | GO:0019538 | 0.0071 | slr1568 | GO:0043169 | 0.0051 | slr0575 | GO:0043169 | 0.004 | slr1999 | GO:0016051 | 0.0024 | slr1970 | GO:0043234 | 0.0009 |
| s117086 | GO:0006139 | 0.0071 | slr1413 | GO:0043169 | 0.0051 | slr0397 | GO:0043169 | 0.004 | slr1648 | GO:0016051 | 0.0024 | slr0334 | GO:0043234 | 0.0009 |
| slr1780 | GO:0019538 | 0.0071 | s117063 | GO:0043169 | 0.0051 | s111233 | GO:0005216 | 0.004 | s111769 | GO:0016070 | 0.0024 | slr1577 | GO:0043234 | 0.0009 |
| ss11263 | GO:0019538 | 0.0071 | s110266 | GO:0043169 | 0.0051 | slr8044 | GO:0005216 | 0.004 | ss13451 | GO:0009116 | 0.0024 | slr6091 | GO:0043234 | 0.0009 |
| s111340 | GO:0006139 | 0.0071 | slr0957 | GO:0043169 | 0.0051 | s110984 | GO:0005216 | 0.004 | ssr7036 | GO:0009116 | 0.0024 | ss11046 | GO:0043234 | 0.0009 |
| ssr2060 | GO:0006139 | 0.0071 | slr1169 | GO:0043169 | 0.0051 | slr1537 | GO:0005216 | 0.004 | ss13379 | GO:0016070 | 0.0024 | slr1935 | GO:0043234 | 0.0009 |
| slr0709 | GO:0006139 | 0.0071 | slr0554 | GO:0043169 | 0.0051 | ss15068 | GO:0005216 | 0.004 | s111426 | GO:0044238 | 0.0024 | slr0645 | GO:0043234 | 0.0009 |
| slr1507 | GO:0006139 | 0.0071 | s111773 | GO:0043169 | 0.0051 | ssr2998 | GO:0005216 | 0.004 | slr1998 | GO:0016070 | 0.0024 | s111926 | GO:0043234 | 0.0009 |
| s111891 | GO:0006139 | 0.0071 | ssr0335 | GO:0043169 | 0.0051 | s110249 | GO:0005216 | 0.004 | s110783 | GO:0030001 | 0.0024 | ssr7079 | GO:0043234 | 0.0009 |
| ss17039 | GO:0006139 | 0.0071 | s110588 | GO:0043169 | 0.0051 | s111698 | GO:0043169 | 0.004 | sg10001 | GO:0009116 | 0.0024 | slr0313 | GO:0043234 | 0.0009 |
| ss12595 | GO:0019538 | 0.0071 | s111350 | GO:0043169 | 0.0051 | s117078 | GO:0043169 | 0.004 | ss10787 | GO:0044238 | 0.0024 | ss16035 | GO:0043234 | 0.0009 |
| s111681 | GO:0019538 | 0.0071 | slr0601 | GO:0043169 | 0.0051 | s115030 | GO:0005216 | 0.004 | slr8014 | GO:0009116 | 0.0024 | ssr5074 | GO:0043234 | 0.0009 |
| slr0325 | GO:0019538 | 0.0071 | ss11520 | GO:0043169 | 0.0051 | s111381 | GO:0043169 | 0.004 | slr5021 | GO:0009116 | 0.0024 | ssr6083 | GO:0043234 | 0.0009 |
| s110405 | GO:0019538 | 0.0071 | slr1260 | GO:0043169 | 0.0051 | slr1599 | GO:0005216 | 0.004 | slr7014 | GO:0016070 | 0.0024 | slr2052 | GO:0043234 | 0.0009 |
| s110525 | GO:0006139 | 0.0071 | slr1062 | GO:0043169 | 0.0051 | ssr2975 | GO:0005216 | 0.004 | s111306 | GO:0009116 | 0.0024 | slr7091 | GO:0043234 | 0.0009 |
| s111640 | GO:0006139 | 0.0071 | s115032 | GO:0043169 | 0.0051 | ss10467 | GO:0043169 | 0.004 | ssr3571 | GO:0016051 | 0.0024 | slr0105 | GO:0043234 | 0.0009 |
| slr0039 | GO:0019538 | 0.0071 | s111225 | GO:0043169 | 0.0051 | ss12138 | GO:0043169 | 0.004 | ss10738 | GO:0016070 | 0.0024 | s110565 | GO:0043234 | 0.0009 |
| s110543 | GO:0006139 | 0.0071 | s110751 | GO:0043169 | 0.0051 | s116052 | GO:0043169 | 0.004 | s111086 | GO:0016051 | 0.0024 | ssr8047 | GO:0043234 | 0.0009 |
| ss11918 | GO:0019538 | 0.0071 | s110815 | GO:0043169 | 0.0051 | slr7099 | GO:0005216 | 0.004 | s110325 | GO:0016051 | 0.0024 | ss11552 | GO:0043234 | 0.0009 |
| slr1599 | GO:0006139 | 0.0071 | ss15098 | GO:0043169 | 0.0051 | s115028 | GO:0043169 | 0.004 | ss10461 | GO:0009116 | 0.0024 | slr6087 | GO:0043234 | 0.0009 |
| slr6016 | GO:0006139 | 0.0071 | s110265 | GO:0043169 | 0.0051 | slr0181 | GO:0005216 | 0.004 | ssr0332 | GO:0009116 | 0.0024 | s110062 | GO:0043234 | 0.0009 |
| slr1601 | GO:0019538 | 0.0071 | slr0380 | GO:0043169 | 0.0051 | ss11263 | GO:0043169 | 0.004 | slr5116 | GO:0016070 | 0.0024 | s110479 | GO:0043234 | 0.0009 |
| s110327 | GO:0019538 | 0.0071 | s111651 | GO:0043169 | 0.0051 | s110031 | GO:0005216 | 0.004 | ssr2439 | GO:0016051 | 0.0024 | slr1599 | GO:0043234 | 0.0009 |
| s110875 | GO:0006139 | 0.0071 | slr1186 | GO:0043169 | 0.0051 | ssr3467 | GO:0005216 | 0.004 | slr0157 | GO:0044238 | 0.0024 | slr0771 | GO:0043234 | 0.0009 |
| ssr7084 | GO:0019538 | 0.0071 | slr1097 | GO:0043169 | 0.0051 | s111142 | GO:0005216 | 0.004 | ss15095 | GO:0016070 | 0.0024 | slr1846 | GO:0043234 | 0.0009 |

|         |            |        |         |            |        |         |            |        |         |            |        |         |            |        |
|---------|------------|--------|---------|------------|--------|---------|------------|--------|---------|------------|--------|---------|------------|--------|
| ssr5106 | GO:0019538 | 0.0071 | s110048 | GO:0043169 | 0.0051 | s110736 | GO:0005216 | 0.004  | s110760 | GO:0016070 | 0.0024 | s1r0689 | GO:0043234 | 0.0009 |
| s1r0651 | GO:0019538 | 0.0071 | s1r1415 | GO:0043169 | 0.0051 | s110875 | GO:0005216 | 0.004  | s111022 | GO:0016070 | 0.0024 | s111289 | GO:0043234 | 0.0009 |
| s1r1926 | GO:0006812 | 0.007  | s111735 | GO:0043169 | 0.0051 | s1r1174 | GO:0043169 | 0.004  | s1r1177 | GO:0016051 | 0.0024 | s117069 | GO:0043234 | 0.0009 |
| s112007 | GO:0007154 | 0.007  | ss15096 | GO:0043169 | 0.0051 | s1r7071 | GO:0005216 | 0.004  | ss10109 | GO:0044238 | 0.0024 | s1r0643 | GO:0043234 | 0.0009 |
| ss11377 | GO:0006812 | 0.007  | s1r1095 | GO:0043169 | 0.0051 | s1r1990 | GO:0043169 | 0.004  | s1r1814 | GO:0009116 | 0.0024 | s1r1601 | GO:0043234 | 0.0009 |
| s1r1959 | GO:0006812 | 0.007  | s1r1338 | GO:0043169 | 0.0051 | s110839 | GO:0005216 | 0.004  | s111696 | GO:0016070 | 0.0024 | s111188 | GO:0043234 | 0.0009 |
| s1r1444 | GO:0006812 | 0.007  | s111960 | GO:0043169 | 0.0051 | s1r1704 | GO:0043169 | 0.004  | ss15031 | GO:0009116 | 0.0024 | s111191 | GO:0043234 | 0.0009 |
| s1r0366 | GO:0007154 | 0.007  | sg10002 | GO:0043169 | 0.0051 | s115128 | GO:0005216 | 0.004  | s1r1547 | GO:0009116 | 0.0024 | s1r1886 | GO:0043234 | 0.0009 |
| s1r1266 | GO:0016853 | 0.007  | s111040 | GO:0043169 | 0.0051 | s116055 | GO:0005216 | 0.004  | s110518 | GO:0009116 | 0.0024 | s115028 | GO:0043234 | 0.0009 |
| s1r1593 | GO:0016853 | 0.007  | s111769 | GO:0043169 | 0.0051 | ssr2754 | GO:0005976 | 0.0039 | s111442 | GO:0016051 | 0.0024 | ss12064 | GO:0043234 | 0.0009 |
| s1r1932 | GO:0016853 | 0.007  | s111541 | GO:0043169 | 0.0051 | s111304 | GO:0005976 | 0.0039 | s111485 | GO:0009116 | 0.0024 | s1r6051 | GO:0043234 | 0.0009 |
| s110237 | GO:0016853 | 0.007  | s1r7081 | GO:0043169 | 0.0051 | s1r0801 | GO:0005976 | 0.0039 | s111414 | GO:0009116 | 0.0024 | ssr2975 | GO:0043234 | 0.0009 |
| s1r1648 | GO:0016853 | 0.007  | s1r0729 | GO:0043169 | 0.0051 | s1r2080 | GO:0005976 | 0.0039 | s1r0380 | GO:0009116 | 0.0024 | s111089 | GO:0043234 | 0.0009 |
| s1r0348 | GO:0016853 | 0.007  | s110180 | GO:0043169 | 0.0051 | s1r1082 | GO:0005976 | 0.0039 | s111062 | GO:0009116 | 0.0024 | s1r1056 | GO:0043234 | 0.0009 |
| s1r1913 | GO:0016853 | 0.007  | ss12009 | GO:0043169 | 0.0051 | ss18008 | GO:0005976 | 0.0039 | s111766 | GO:0009116 | 0.0024 | s115132 | GO:0043234 | 0.0009 |
| s1r0360 | GO:0016853 | 0.007  | s111267 | GO:0043169 | 0.0051 | s111541 | GO:0005976 | 0.0039 | s110532 | GO:0016051 | 0.0024 | ssr8013 | GO:0043234 | 0.0009 |
| s110676 | GO:0016853 | 0.007  | s1r1223 | GO:0043169 | 0.0051 | s110572 | GO:0005976 | 0.0039 | s110780 | GO:0016051 | 0.0024 | ss11263 | GO:0043234 | 0.0009 |
| ssr3122 | GO:0016853 | 0.007  | s1r1864 | GO:0043169 | 0.0051 | s111225 | GO:0005976 | 0.0039 | s1r7082 | GO:0016070 | 0.0024 | s1r0516 | GO:0043234 | 0.0009 |
| s111656 | GO:0016853 | 0.007  | s1r0092 | GO:0043169 | 0.0051 | s1r0975 | GO:0005976 | 0.0039 | s110314 | GO:0016051 | 0.0024 | s111476 | GO:0043234 | 0.0009 |
| s1r1880 | GO:0016853 | 0.007  | ss15065 | GO:0043169 | 0.0051 | s111390 | GO:0005976 | 0.0039 | s110815 | GO:0009116 | 0.0024 | s111009 | GO:0043234 | 0.0009 |
| s1r1572 | GO:0016853 | 0.007  | s110775 | GO:0043169 | 0.0051 | s110669 | GO:0005976 | 0.0039 | s1r1437 | GO:0016051 | 0.0024 | s111319 | GO:0043234 | 0.0009 |
| s1r1203 | GO:0016853 | 0.007  | s1r0489 | GO:0043169 | 0.0051 | s110888 | GO:0005976 | 0.0039 | s1r0142 | GO:0009116 | 0.0024 | ss13829 | GO:0043234 | 0.0009 |
| s1r1573 | GO:0016853 | 0.007  | s1r6072 | GO:0043169 | 0.0051 | sm10011 | GO:0005976 | 0.0039 | s110447 | GO:0044238 | 0.0024 | s117031 | GO:0043234 | 0.0009 |
| s110944 | GO:0016853 | 0.007  | s111634 | GO:0043169 | 0.0051 | s111241 | GO:0005976 | 0.0039 | s110361 | GO:0030001 | 0.0024 | s111307 | GO:0043234 | 0.0009 |
| s111262 | GO:0016853 | 0.007  | s1r6015 | GO:0043169 | 0.0051 | s110843 | GO:0005976 | 0.0039 | s1r1378 | GO:0016070 | 0.0024 | s1r6106 | GO:0043234 | 0.0009 |
| s1r1885 | GO:0016853 | 0.007  | s1r0199 | GO:0043169 | 0.0051 | s110319 | GO:0005976 | 0.0039 | s1r6101 | GO:0009116 | 0.0024 | s1r0109 | GO:0043234 | 0.0009 |
| s110355 | GO:0016853 | 0.007  | ss10738 | GO:0043169 | 0.0051 | s110995 | GO:0005976 | 0.0039 | s1r7023 | GO:0009116 | 0.0024 | ssr6024 | GO:0043234 | 0.0009 |
| s1r1638 | GO:0016853 | 0.007  | s1r6064 | GO:0043169 | 0.0051 | s1r0483 | GO:0005976 | 0.0039 | s111318 | GO:0044238 | 0.0024 | s111652 | GO:0043234 | 0.0009 |
| s110532 | GO:0016853 | 0.007  | s1r0887 | GO:0043169 | 0.0051 | s1r1702 | GO:0006164 | 0.0039 | ssr1258 | GO:0016070 | 0.0024 | s110678 | GO:0043234 | 0.0009 |
| s110524 | GO:0016853 | 0.007  | s1r8014 | GO:0043169 | 0.0051 | s1r1541 | GO:0005976 | 0.0039 | s110863 | GO:0009116 | 0.0024 | s1r0816 | GO:0043234 | 0.0009 |
| s1r1999 | GO:0016853 | 0.007  | s111938 | GO:0043169 | 0.0051 | s1r1338 | GO:0005976 | 0.0039 | ssr2848 | GO:0044238 | 0.0024 | s111068 | GO:0043234 | 0.0009 |
| s111761 | GO:0016853 | 0.007  | s110727 | GO:0043169 | 0.0051 | s110639 | GO:0005976 | 0.0039 | s1r0049 | GO:0016070 | 0.0024 | s1r1563 | GO:0043234 | 0.0009 |
| s110198 | GO:0016853 | 0.007  | s1r1768 | GO:0043169 | 0.0051 | s110242 | GO:0016820 | 0.0039 | s1r1864 | GO:0016070 | 0.0024 | s111882 | GO:0043234 | 0.0009 |
| s1r0392 | GO:0016853 | 0.007  | s111461 | GO:0043169 | 0.0051 | ss10483 | GO:0044238 | 0.0038 | ss10461 | GO:0016070 | 0.0024 | ssr6099 | GO:0043234 | 0.0009 |
| s110066 | GO:0016853 | 0.007  | s1r6063 | GO:0043169 | 0.0051 | s111344 | GO:0044238 | 0.0038 | s1r1534 | GO:0009116 | 0.0024 | s1r6033 | GO:0043234 | 0.0009 |
| s1r1667 | GO:0016853 | 0.007  | s110614 | GO:0043169 | 0.0051 | s1r1290 | GO:0006886 | 0.0038 | s110785 | GO:0016051 | 0.0024 | s1r6104 | GO:0043234 | 0.0009 |
| s1r0192 | GO:0016853 | 0.007  | s1r0664 | GO:0043169 | 0.0051 | s1r5119 | GO:0006790 | 0.0038 | s111092 | GO:0009116 | 0.0024 | ssr2067 | GO:0043234 | 0.0009 |
| ssr2962 | GO:0016853 | 0.007  | s110688 | GO:0043169 | 0.0051 | s110479 | GO:0006886 | 0.0038 | s1r0294 | GO:0016051 | 0.0024 | s111429 | GO:0043234 | 0.0009 |
| s110785 | GO:0016853 | 0.007  | s117043 | GO:0043169 | 0.0051 | s118032 | GO:0006790 | 0.0038 | s1r1677 | GO:0016070 | 0.0024 | ssr0336 | GO:0043234 | 0.0009 |
| s110910 | GO:0006629 | 0.0069 | s115047 | GO:0043169 | 0.0051 | ss15095 | GO:0006790 | 0.0038 | ssr2201 | GO:0016070 | 0.0024 | s1r1623 | GO:0043234 | 0.0009 |
| s110505 | GO:0006629 | 0.0069 | s111730 | GO:0043169 | 0.0051 | s110176 | GO:0006790 | 0.0038 | s116054 | GO:0009116 | 0.0024 | s1r5111 | GO:0043234 | 0.0009 |
| s1r1222 | GO:0006629 | 0.0069 | s1r0169 | GO:0043169 | 0.0051 | s111764 | GO:0006790 | 0.0038 | s1r1230 | GO:0016051 | 0.0024 | s1r0708 | GO:0043234 | 0.0009 |
| s111060 | GO:0006629 | 0.0069 | s1r0510 | GO:0043169 | 0.0051 | s1r1062 | GO:0044238 | 0.0038 | ssr2317 | GO:0016070 | 0.0024 | s1r0878 | GO:0043234 | 0.0009 |
| s1r1659 | GO:0006629 | 0.0069 | s1r1378 | GO:0043169 | 0.0051 | s111956 | GO:0044238 | 0.0038 | s110369 | GO:0016070 | 0.0024 | ss10788 | GO:0043234 | 0.0009 |
| ssr1698 | GO:0006629 | 0.0069 | s111766 | GO:0043169 | 0.0051 | s111769 | GO:0006790 | 0.0038 | ss15096 | GO:0009116 | 0.0024 | s1r6022 | GO:0043234 | 0.0009 |
| s1r1767 | GO:0006629 | 0.0069 | s1r0981 | GO:0043169 | 0.0051 | s110909 | GO:0044238 | 0.0038 | ssr2317 | GO:0009116 | 0.0024 | s1r0082 | GO:0043234 | 0.0009 |
| s111174 | GO:0006629 | 0.0069 | s110752 | GO:0043169 | 0.0051 | s111873 | GO:0044238 | 0.0038 | s111389 | GO:0016070 | 0.0024 | s1r0238 | GO:0043234 | 0.0009 |
| s1r1107 | GO:0006629 | 0.0069 | s110853 | GO:0043169 | 0.0051 | s111380 | GO:0006886 | 0.0038 | s115130 | GO:0016070 | 0.0024 | ssr3467 | GO:0043234 | 0.0009 |
| s1r1612 | GO:0006629 | 0.0069 | s110871 | GO:0043169 | 0.0051 | s1r7013 | GO:0006790 | 0.0038 | s111062 | GO:0016070 | 0.0024 | s1r6016 | GO:0043234 | 0.0009 |
| s1r1917 | GO:0006629 | 0.0069 | s1r1261 | GO:0043169 | 0.0051 | s118012 | GO:0006886 | 0.0038 | s1r2119 | GO:0016070 | 0.0024 | ssr0759 | GO:0043234 | 0.0009 |
| s1r0287 | GO:0006629 | 0.0069 | s110886 | GO:0043169 | 0.0051 | s1r0957 | GO:0044238 | 0.0038 | s1r1546 | GO:0016070 | 0.0024 | ss16092 | GO:0043234 | 0.0009 |
| s110558 | GO:0006629 | 0.0069 | ssr1499 | GO:0043169 | 0.0051 | s1r1895 | GO:0044238 | 0.0038 | ss13383 | GO:0016070 | 0.0024 | s1r6029 | GO:0043234 | 0.0009 |
| s1r0852 | GO:0006629 | 0.0069 | s1r0654 | GO:0043169 | 0.0051 | s1r5018 | GO:0006790 | 0.0038 | s111960 | GO:0016070 | 0.0024 | ss15108 | GO:0043234 | 0.0009 |
| s1r1519 | GO:0006629 | 0.0069 | s110478 | GO:0043169 | 0.0051 | s1r1790 | GO:0006886 | 0.0038 | s111942 | GO:0044238 | 0.0024 | s1r2049 | GO:0043234 | 0.0009 |

|         |            |        |         |            |        |         |            |        |         |            |        |         |            |        |
|---------|------------|--------|---------|------------|--------|---------|------------|--------|---------|------------|--------|---------|------------|--------|
| s110274 | GO:0006629 | 0.0069 | s1r1362 | GO:0043169 | 0.0051 | s110596 | GO:0030001 | 0.0038 | s110930 | GO:0009116 | 0.0024 | s110157 | GO:0043234 | 0.0009 |
| ssr2201 | GO:0007154 | 0.0068 | s1r1600 | GO:0043169 | 0.0051 | s110843 | GO:0044238 | 0.0038 | s1r1484 | GO:0009116 | 0.0024 | s1r5112 | GO:0043234 | 0.0009 |
| s1r1495 | GO:0007154 | 0.0068 | s1r1287 | GO:0043169 | 0.0051 | s110888 | GO:0044238 | 0.0038 | s115062 | GO:0016070 | 0.0024 | s111381 | GO:0043234 | 0.0009 |
| s111749 | GO:0007154 | 0.0068 | s110659 | GO:0043169 | 0.0051 | s111552 | GO:0006790 | 0.0038 | s1r1173 | GO:0016853 | 0.0024 | s1r1990 | GO:0043234 | 0.0009 |
| s1r0341 | GO:0019538 | 0.0068 | s111509 | GO:0043169 | 0.0051 | s110615 | GO:0030001 | 0.0038 | s110294 | GO:0016853 | 0.0024 | ss17007 | GO:0043234 | 0.0009 |
| s1r0810 | GO:0019538 | 0.0068 | s1r1179 | GO:0043169 | 0.0051 | s111186 | GO:0030001 | 0.0038 | s111233 | GO:0016853 | 0.0024 | s110875 | GO:0043234 | 0.0009 |
| s110310 | GO:0007154 | 0.0068 | s110913 | GO:0043169 | 0.0051 | ss11923 | GO:0006790 | 0.0038 | s111714 | GO:0016853 | 0.0024 | s118035 | GO:0043234 | 0.0009 |
| ss10832 | GO:0007154 | 0.0068 | s115026 | GO:0043169 | 0.0051 | s111052 | GO:0006886 | 0.0038 | s118001 | GO:0016853 | 0.0024 | s1r0967 | GO:0043234 | 0.0009 |
| s1r1032 | GO:0007154 | 0.0068 | s1r6031 | GO:0043169 | 0.0051 | s110189 | GO:0044238 | 0.0038 | s1r0885 | GO:0016853 | 0.0024 | s1r0656 | GO:0043234 | 0.0009 |
| s1r0366 | GO:0019538 | 0.0068 | s1r6065 | GO:0043169 | 0.0051 | ss12781 | GO:0006790 | 0.0038 | s1r5024 | GO:0016853 | 0.0024 | s110670 | GO:0043234 | 0.0009 |
| s111737 | GO:0019538 | 0.0068 | s1r1472 | GO:0043169 | 0.0051 | s1r0147 | GO:0006139 | 0.0038 | s111289 | GO:0016853 | 0.0024 | ss17048 | GO:0043234 | 0.0009 |
| s110763 | GO:0007154 | 0.0068 | s111201 | GO:0043169 | 0.0051 | s1r0930 | GO:0044238 | 0.0038 | s1r1601 | GO:0016853 | 0.0024 | s1r1438 | GO:0043234 | 0.0009 |
| s110238 | GO:0007154 | 0.0068 | s111853 | GO:0043169 | 0.0051 | s1r2010 | GO:0006790 | 0.0038 | s117087 | GO:0016853 | 0.0024 | s110736 | GO:0043234 | 0.0009 |
| s115061 | GO:0016829 | 0.0068 | s1r1470 | GO:0043169 | 0.0051 | s117065 | GO:0044238 | 0.0038 | s110047 | GO:0016853 | 0.0024 | ssr6030 | GO:0043234 | 0.0009 |
| s1r0655 | GO:0016829 | 0.0068 | s110282 | GO:0043169 | 0.0051 | s1r2110 | GO:0006886 | 0.0038 | s1r1307 | GO:0046873 | 0.0024 | ssr6019 | GO:0043234 | 0.0009 |
| ssr2554 | GO:0016829 | 0.0068 | s1r6101 | GO:0043169 | 0.0051 | s110446 | GO:0006139 | 0.0038 | ss17022 | GO:0016853 | 0.0024 | s1r0269 | GO:0043234 | 0.0009 |
| s1r1927 | GO:0016829 | 0.0068 | s1r1690 | GO:0043169 | 0.0051 | s1r1863 | GO:0006790 | 0.0038 | s111926 | GO:0016853 | 0.0024 | ssr2972 | GO:0043234 | 0.0009 |
| s1r1547 | GO:0016829 | 0.0068 | s110423 | GO:0043169 | 0.0051 | s110658 | GO:0006790 | 0.0038 | s1r0300 | GO:0016853 | 0.0024 | s1r6094 | GO:0043234 | 0.0009 |
| s1r5023 | GO:0016829 | 0.0068 | s1r1195 | GO:0043169 | 0.0051 | s110513 | GO:0030001 | 0.0038 | s1r1396 | GO:0016853 | 0.0024 | s110939 | GO:0043234 | 0.0009 |
| s1r7013 | GO:0016829 | 0.0068 | s1r7015 | GO:0043169 | 0.0051 | s110298 | GO:0006886 | 0.0038 | ss13829 | GO:0016853 | 0.0024 | s110372 | GO:0043234 | 0.0009 |
| ss12420 | GO:0016829 | 0.0068 | s1r1611 | GO:0043169 | 0.0051 | s111241 | GO:0044238 | 0.0038 | s111902 | GO:0043169 | 0.0024 | s1r5126 | GO:0043234 | 0.0009 |
| s111092 | GO:0016829 | 0.0068 | s110980 | GO:0043169 | 0.0051 | s111752 | GO:0044238 | 0.0038 | ss16092 | GO:0016853 | 0.0024 | s110442 | GO:0043234 | 0.0009 |
| s1r0065 | GO:0016829 | 0.0068 | ssr3189 | GO:0043169 | 0.0051 | s1r0654 | GO:0044238 | 0.0038 | s110479 | GO:0016853 | 0.0024 | ss17051 | GO:0043234 | 0.0009 |
| s1r1378 | GO:0016829 | 0.0068 | s1r1128 | GO:0043169 | 0.0051 | s1r1762 | GO:0044238 | 0.0038 | s1r5102 | GO:0016853 | 0.0024 | ss12814 | GO:0043234 | 0.0009 |
| s1r0581 | GO:0016829 | 0.0068 | s1r2048 | GO:0043169 | 0.0051 | s1r0655 | GO:0006790 | 0.0038 | s1r1780 | GO:0016853 | 0.0024 | s1r5037 | GO:0043234 | 0.0009 |
| s118007 | GO:0016829 | 0.0068 | s1r1958 | GO:0043169 | 0.0051 | s1r0291 | GO:0006886 | 0.0038 | s118011 | GO:0016853 | 0.0024 | s1r1396 | GO:0043234 | 0.0009 |
| s1r1920 | GO:0016829 | 0.0068 | s1r0362 | GO:0043169 | 0.0051 | s110858 | GO:0006886 | 0.0038 | s111424 | GO:0043169 | 0.0024 | s1r1184 | GO:0043234 | 0.0009 |
| ss10312 | GO:0016829 | 0.0068 | s110156 | GO:0043169 | 0.0051 | ss10350 | GO:0006886 | 0.0038 | s118040 | GO:0016853 | 0.0024 | s117055 | GO:0043234 | 0.0009 |
| ss12245 | GO:0016829 | 0.0068 | s110189 | GO:0043169 | 0.0051 | s1r1677 | GO:0006790 | 0.0038 | s1r1290 | GO:0016853 | 0.0024 | ss11300 | GO:0043234 | 0.0009 |
| s1r1150 | GO:0016829 | 0.0068 | s111411 | GO:0043169 | 0.0051 | s111884 | GO:0006790 | 0.0038 | s110505 | GO:0046873 | 0.0024 | s117086 | GO:0043234 | 0.0009 |
| s111961 | GO:0016829 | 0.0068 | s110241 | GO:0043169 | 0.0051 | s1r6087 | GO:0006886 | 0.0038 | s1r0459 | GO:0016853 | 0.0024 | s1r0976 | GO:0043234 | 0.0009 |
| s111447 | GO:0016829 | 0.0068 | s111654 | GO:0043169 | 0.0051 | ssr3300 | GO:0044238 | 0.0038 | s1r1951 | GO:0016853 | 0.0024 | s1r0590 | GO:0043234 | 0.0009 |
| s117063 | GO:0016829 | 0.0068 | s110872 | GO:0043169 | 0.0051 | s1r1862 | GO:0044238 | 0.0038 | s111915 | GO:0016853 | 0.0024 | s110543 | GO:0043234 | 0.0009 |
| ssr6046 | GO:0016829 | 0.0068 | s110449 | GO:0043169 | 0.0051 | s115026 | GO:0006790 | 0.0038 | s1r0285 | GO:0016853 | 0.0024 | s111698 | GO:0043234 | 0.0009 |
| s110630 | GO:0016829 | 0.0068 | s117065 | GO:0043169 | 0.0051 | s1r5116 | GO:0006790 | 0.0038 | ss11552 | GO:0016853 | 0.0024 | s1r0509 | GO:0043234 | 0.0009 |
| s1r6101 | GO:0016829 | 0.0068 | s110602 | GO:0043169 | 0.0051 | ssr3154 | GO:0006139 | 0.0038 | s110783 | GO:0046873 | 0.0024 | s111640 | GO:0043234 | 0.0009 |
| s117043 | GO:0016829 | 0.0068 | s111217 | GO:0043169 | 0.0051 | s1r5037 | GO:0006886 | 0.0038 | s110552 | GO:0016853 | 0.0024 | s118019 | GO:0043234 | 0.0009 |
| s111217 | GO:0016829 | 0.0068 | ss11498 | GO:0043169 | 0.0051 | s1r1391 | GO:0030001 | 0.0038 | s110069 | GO:0016853 | 0.0024 | ss13615 | GO:0043234 | 0.0009 |
| s1r6067 | GO:0016829 | 0.0068 | s1r1657 | GO:0043169 | 0.0051 | s1r1074 | GO:0044238 | 0.0038 | s1r0610 | GO:0016853 | 0.0024 | s115128 | GO:0043234 | 0.0009 |
| s1r1187 | GO:0016829 | 0.0068 | s110611 | GO:0043169 | 0.0051 | s1r0151 | GO:0006790 | 0.0038 | s1r5112 | GO:0016853 | 0.0024 | s115063 | GO:0043234 | 0.0009 |
| s1r1958 | GO:0016829 | 0.0068 | s111389 | GO:0043169 | 0.0051 | s110614 | GO:0044238 | 0.0038 | s1r2018 | GO:0043169 | 0.0024 | s1r1670 | GO:0043234 | 0.0009 |
| s110860 | GO:0016829 | 0.0068 | s1r0145 | GO:0043169 | 0.0051 | s111640 | GO:0006886 | 0.0038 | s117067 | GO:0016853 | 0.0024 | s1r1681 | GO:0043234 | 0.0009 |
| ss12148 | GO:0016829 | 0.0068 | s110888 | GO:0043169 | 0.0051 | ssr2009 | GO:0044238 | 0.0038 | ssr5106 | GO:0016853 | 0.0024 | s1r2042 | GO:0043234 | 0.0009 |
| s115090 | GO:0016829 | 0.0068 | s1r1468 | GO:0043169 | 0.0051 | ssr5020 | GO:0006790 | 0.0038 | s111652 | GO:0016853 | 0.0024 | s112011 | GO:0043234 | 0.0009 |
| s111606 | GO:0016829 | 0.0068 | s111222 | GO:0006396 | 0.005  | s1r1442 | GO:0006886 | 0.0038 | ss12384 | GO:0016853 | 0.0024 | s118027 | GO:0043234 | 0.0009 |
| s111510 | GO:0016829 | 0.0068 | s111477 | GO:0006396 | 0.005  | s1r2103 | GO:0006886 | 0.0038 | s1r0637 | GO:0016853 | 0.0024 | ss17039 | GO:0043234 | 0.0009 |
| ssr0335 | GO:0016829 | 0.0068 | s1r0602 | GO:0005975 | 0.005  | s1r0503 | GO:0030001 | 0.0038 | s1r1819 | GO:0016853 | 0.0024 | ssr3129 | GO:0043234 | 0.0009 |
| s111306 | GO:0016829 | 0.0068 | s1r1773 | GO:0006396 | 0.005  | s1r0142 | GO:0006790 | 0.0038 | s1r0181 | GO:0016853 | 0.0024 | s1r1790 | GO:0043234 | 0.0009 |
| s111651 | GO:0016829 | 0.0068 | s111272 | GO:0006396 | 0.005  | s111004 | GO:0006790 | 0.0038 | s110442 | GO:0016853 | 0.0024 | ssr7093 | GO:0043234 | 0.0009 |
| s1r1339 | GO:0016829 | 0.0068 | s1r1591 | GO:0006396 | 0.005  | s1r1659 | GO:0030001 | 0.0038 | s110558 | GO:0046873 | 0.0024 | s111714 | GO:0043234 | 0.0009 |
| s110803 | GO:0016829 | 0.0068 | s117033 | GO:0006812 | 0.0049 | s110765 | GO:0006886 | 0.0038 | s1r1911 | GO:0016853 | 0.0024 | ss12138 | GO:0043234 | 0.0009 |
| s1r0337 | GO:0016829 | 0.0068 | s110525 | GO:0006812 | 0.0049 | s1r0271 | GO:0006886 | 0.0038 | s110736 | GO:0016853 | 0.0024 | s118012 | GO:0043234 | 0.0009 |
| ss18003 | GO:0016829 | 0.0068 | s1r0712 | GO:0006812 | 0.0049 | s1r0521 | GO:0006886 | 0.0038 | s1r0689 | GO:0016853 | 0.0024 | ss10467 | GO:0043234 | 0.0009 |
| s1r1816 | GO:0043234 | 0.0009 | s1r2071 | GO:0043234 | 0.0009 | s110641 | GO:0016788 | 0.0008 | s1r1812 | GO:0005216 | 0.0006 | s1r1636 | GO:0043234 | 0.0004 |

|         |            |        |         |            |        |         |            |        |         |            |        |         |            |        |
|---------|------------|--------|---------|------------|--------|---------|------------|--------|---------|------------|--------|---------|------------|--------|
| sl17006 | GO:0043234 | 0.0009 | sl17077 | GO:0043234 | 0.0009 | sl11293 | GO:0043234 | 0.0008 | slr0602 | GO:0019538 | 0.0005 | sl10933 | GO:0006139 | 0.0003 |
| ssr1155 | GO:0043234 | 0.0009 | slr7060 | GO:0043234 | 0.0009 | slr1614 | GO:0043234 | 0.0008 | slr1614 | GO:0044238 | 0.0005 | sl10242 | GO:0006812 | 0.0003 |
| slr0345 | GO:0043234 | 0.0009 | slr1079 | GO:0043234 | 0.0009 | sl11763 | GO:0043234 | 0.0008 | sl10641 | GO:0006807 | 0.0005 | sl10488 | GO:0016810 | 0.0003 |
| slr7099 | GO:0043234 | 0.0009 | sl10069 | GO:0043234 | 0.0009 | sl10779 | GO:0043234 | 0.0008 | sl10445 | GO:0007154 | 0.0005 | sl10445 | GO:0008324 | 0.0003 |
| slr7071 | GO:0043234 | 0.0009 | sl10405 | GO:0043234 | 0.0009 | slr1235 | GO:0043234 | 0.0008 | sl10584 | GO:0044262 | 0.0005 | slr1052 | GO:0004872 | 0.0003 |
| slr6028 | GO:0043234 | 0.0009 | slr5087 | GO:0043234 | 0.0009 | sl10350 | GO:0043234 | 0.0008 | slr1235 | GO:0044262 | 0.0005 | sl10149 | GO:0016772 | 0.0003 |
| slr0397 | GO:0043234 | 0.0009 | slr2000 | GO:0043234 | 0.0009 | slr1644 | GO:0008299 | 0.0007 | sl11763 | GO:0044262 | 0.0005 | sl10641 | GO:0008324 | 0.0003 |
| ss15015 | GO:0043234 | 0.0009 | slr6009 | GO:0043234 | 0.0009 | sl11272 | GO:0044262 | 0.0007 | ssr3154 | GO:0016829 | 0.0005 | sl11222 | GO:0006725 | 0.0002 |
| slr0300 | GO:0043234 | 0.0009 | slr5013 | GO:0043234 | 0.0009 | slr1699 | GO:0016853 | 0.0007 | ssr0692 | GO:0016829 | 0.0005 | ss10750 | GO:0016051 | 0.0002 |
| sl11340 | GO:0043234 | 0.0009 | slr0634 | GO:0043234 | 0.0009 | sl11293 | GO:0016829 | 0.0007 | slr0765 | GO:0016829 | 0.0005 | slr0765 | GO:0006725 | 0.0002 |
| slr1425 | GO:0043234 | 0.0009 | sl11036 | GO:0043234 | 0.0009 | ss10750 | GO:0004872 | 0.0007 | slr0818 | GO:0016829 | 0.0005 | slr1812 | GO:0016070 | 0.0002 |
| ss10350 | GO:0043234 | 0.0009 | sl11321 | GO:0043234 | 0.0009 | sl10584 | GO:0016829 | 0.0007 | sl10933 | GO:0042626 | 0.0005 | slr1644 | GO:0016853 | 0.0002 |
| slr6075 | GO:0043234 | 0.0009 | sl10552 | GO:0043234 | 0.0009 | sl10350 | GO:0016829 | 0.0007 | sl11995 | GO:0016829 | 0.0005 | slr1431 | GO:0016788 | 0.0002 |
| sl11891 | GO:0043234 | 0.0009 | slr1911 | GO:0043234 | 0.0009 | sl10584 | GO:0004872 | 0.0007 | sl11272 | GO:0016829 | 0.0005 | sl10068 | GO:0016829 | 0.0002 |
| sl17050 | GO:0043234 | 0.0009 | slr1915 | GO:0043234 | 0.0009 | slr1235 | GO:0004872 | 0.0007 | sl10656 | GO:0016829 | 0.0005 | slr1699 | GO:0044238 | 0.0001 |
| ssr0109 | GO:0043234 | 0.0009 | sl10162 | GO:0043234 | 0.0009 | slr1052 | GO:0016853 | 0.0007 | slr0108 | GO:0016829 | 0.0005 | slr1812 | GO:0005976 | 0.0001 |
| ss15008 | GO:0043234 | 0.0009 | sl10625 | GO:0043234 | 0.0009 | sl10350 | GO:0004872 | 0.0007 | ssr2142 | GO:0016810 | 0.0005 | sl10931 | GO:0044238 | 0.0001 |
| ss15100 | GO:0043234 | 0.0009 | slr0271 | GO:0043234 | 0.0009 | sl11527 | GO:0016829 | 0.0007 | slr1431 | GO:0016810 | 0.0005 | slr1636 | GO:0044238 | 0.0001 |
| sl15109 | GO:0043234 | 0.0009 | sl11106 | GO:0043234 | 0.0009 | slr2092 | GO:0006520 | 0.0006 | sl11995 | GO:0016051 | 0.0004 | slr1215 | GO:0044267 | 0.0001 |
| slr0241 | GO:0043234 | 0.0009 | sl10905 | GO:0043234 | 0.0009 | slr1644 | GO:0006139 | 0.0006 | sl10413 | GO:0044249 | 0.0004 | sl10413 | GO:0005976 | 0.0001 |
| sl11785 | GO:0043234 | 0.0009 | sl11681 | GO:0043234 | 0.0009 | sl12007 | GO:0006520 | 0.0006 | sl10898 | GO:0016051 | 0.0004 | sl10068 | GO:0006790 | 0.0001 |
| slr1718 | GO:0043234 | 0.0009 | slr7102 | GO:0043234 | 0.0009 | slr1431 | GO:0006139 | 0.0006 | sl11477 | GO:0016051 | 0.0004 | slr1215 | GO:0044249 | 0.0001 |
| sl11911 | GO:0043234 | 0.0009 | sl11573 | GO:0043234 | 0.0009 | sl11858 | GO:0006725 | 0.0006 | ss10750 | GO:0030001 | 0.0004 | sl10445 | GO:0043169 | 0.0001 |
| ssr2553 | GO:0043234 | 0.0009 | slr1206 | GO:0043234 | 0.0009 | sl10445 | GO:0015031 | 0.0006 | sl10445 | GO:0019538 | 0.0004 | sl10641 | GO:0046873 | 0.0001 |
| slr0459 | GO:0043234 | 0.0009 | sl11979 | GO:0043234 | 0.0009 | sl10488 | GO:0015031 | 0.0006 | sl11477 | GO:0016070 | 0.0004 | slr1699 | GO:0046873 | 0.0001 |
| sl11285 | GO:0043234 | 0.0009 | sl10294 | GO:0043234 | 0.0009 | sl10446 | GO:0009116 | 0.0006 | sl11446 | GO:0016051 | 0.0004 | sl10413 | GO:0046873 | 0.0001 |
| ssr7084 | GO:0043234 | 0.0009 | ss12069 | GO:0043234 | 0.0009 | sl10933 | GO:0019538 | 0.0006 | slr0765 | GO:0016070 | 0.0004 | sl10985 | GO:0016810 | 0.0001 |
| sl10253 | GO:0043234 | 0.0009 | sl10925 | GO:0043234 | 0.0009 | ss11255 | GO:0006520 | 0.0006 | sl10641 | GO:0019538 | 0.0004 | sl10068 | GO:0046873 | 0.0001 |
| ssr2318 | GO:0043234 | 0.0009 | ss12971 | GO:0043234 | 0.0009 | sl11528 | GO:0009116 | 0.0006 | sl11527 | GO:0030001 | 0.0004 | slr0602 | GO:0016853 | 0.0001 |
| slr0730 | GO:0043234 | 0.0009 | ss15068 | GO:0043234 | 0.0009 | ss10294 | GO:0005216 | 0.0006 | slr0765 | GO:0016051 | 0.0004 | sl10445 | GO:0016853 | 0.0001 |
| sl11151 | GO:0043234 | 0.0009 | ss17074 | GO:0043234 | 0.0009 | sl10350 | GO:0005216 | 0.0006 | slr0818 | GO:0016051 | 0.0004 | slr0602 | GO:0016829 | 0.0001 |
| sl17033 | GO:0043234 | 0.0009 | sl15003 | GO:0043234 | 0.0009 | sl10931 | GO:0005216 | 0.0006 | ss10750 | GO:0006730 | 0.0004 | slr1431 | GO:0043234 | 0.0001 |
| ssr5106 | GO:0043234 | 0.0009 | slr1699 | GO:0006629 | 0.0008 | sl11527 | GO:0005216 | 0.0006 | sl10931 | GO:0016829 | 0.0004 | slr1644 | GO:0043234 | 0.0001 |
| slr0498 | GO:0043234 | 0.0009 | sl11995 | GO:0030001 | 0.0008 | sl11995 | GO:0005216 | 0.0006 | slr1614 | GO:0046873 | 0.0004 |         |            |        |
| slr5101 | GO:0043234 | 0.0009 | slr1773 | GO:0030001 | 0.0008 | sl11763 | GO:0005216 | 0.0006 | slr1431 | GO:0005216 | 0.0004 |         |            |        |
| slr1394 | GO:0043234 | 0.0009 | ssr0692 | GO:0046873 | 0.0008 | sl10584 | GO:0005216 | 0.0006 | ss10750 | GO:0046873 | 0.0004 |         |            |        |
| slr1780 | GO:0043234 | 0.0009 | sl10735 | GO:0046873 | 0.0008 | slr1773 | GO:0005216 | 0.0006 | slr1812 | GO:0043234 | 0.0004 |         |            |        |
| slr1513 | GO:0043234 | 0.0009 | sl11272 | GO:0046873 | 0.0008 | ssr2142 | GO:0008324 | 0.0006 | slr1052 | GO:0043234 | 0.0004 |         |            |        |
| slr2003 | GO:0043234 | 0.0009 | slr0108 | GO:0046873 | 0.0008 | slr0642 | GO:0005216 | 0.0006 | slr1699 | GO:0043234 | 0.0004 |         |            |        |

**Supplemental Table S6. The information of 19 sub-networks.**

| <b>Sub_Network</b> | <b>Gene</b> | <b>Sub_Network</b> | <b>Gene</b> | <b>Sub_Network</b> | <b>Gene</b> |
|--------------------|-------------|--------------------|-------------|--------------------|-------------|
| sub_network_1      | sml0003     | sub_network_3      | slr1185     | sub_network_7      | sll0012     |
| sub_network_1      | slr1739     | sub_network_3      | smr0003     | sub_network_7      | sll0666     |
| sub_network_1      | slr0927     | sub_network_3      | sll1382     | sub_network_7      | sll0665     |
| sub_network_1      | ssl2598     | sub_network_3      | slr1643     | sub_network_7      | sll0677     |
| sub_network_1      | sml0002     | sub_network_3      | slr0342     | sub_network_7      | sll1716     |
| sub_network_1      | sll0849     | sub_network_3      | sll1182     | sub_network_7      | sll1710     |
| sub_network_1      | sml0007     | sub_network_3      | sll1317     | sub_network_8      | sll0317     |
| sub_network_1      | smr0007     | sub_network_3      | slr0150     | sub_network_8      | sll1255     |
| sub_network_1      | slr1311     | sub_network_3      | sll1316     | sub_network_8      | sll1780     |
| sub_network_1      | sll1281     | sub_network_3      | slr0343     | sub_network_8      | sll1560     |
| sub_network_1      | sll0427     | sub_network_3      | slr1828     | sub_network_8      | sll1474     |
| sub_network_1      | sll0247     | sub_network_3      | sll0199     | sub_network_9      | sll0651     |
| sub_network_1      | sll0851     | sub_network_3      | sll1796     | sub_network_9      | sll0700     |
| sub_network_1      | sml0001     | sub_network_3      | smr0010     | sub_network_9      | sll0431     |
| sub_network_1      | smr0009     | sub_network_4      | slr2051     | sub_network_9      | sll0201     |
| sub_network_1      | ssr3451     | sub_network_4      | sll1051     | sub_network_10     | slr1044     |
| sub_network_1      | sll0258     | sub_network_4      | slr2067     | sub_network_10     | sll1229     |
| sub_network_1      | sll1194     | sub_network_4      | slr1459     | sub_network_10     | sll1228     |
| sub_network_1      | smr0008     | sub_network_4      | sll1577     | sub_network_11     | ssr1258     |
| sub_network_1      | slr1181     | sub_network_4      | slr1986     | sub_network_11     | slr0653     |
| sub_network_1      | sll1867     | sub_network_4      | ssr3383     | sub_network_11     | slr1999_2   |
| sub_network_1      | slr0906     | sub_network_4      | slr1878     | sub_network_11     | ssr1765     |
| sub_network_1      | sml0005     | sub_network_4      | sll1580     | sub_network_12     | sll1427     |
| sub_network_1      | sll1398     | sub_network_4      | sll1579     | sub_network_12     | slr1204     |
| sub_network_1      | sll1418     | sub_network_4      | ssl3093     | sub_network_12     | sll0856     |
| sub_network_1      | slr1645     | sub_network_4      | sll1471     | sub_network_13     | sll2007     |
| sub_network_1      | smr0006     | sub_network_4      | sll1578     | sub_network_13     | sll2006     |
| sub_network_1      | smr0001     | sub_network_4      | sll0928     | sub_network_13     | sll2005     |
| sub_network_2      | slr1281     | sub_network_4      | slr0335     | sub_network_14     | slr1660     |
| sub_network_2      | slr1280     | sub_network_5      | smr0004     | sub_network_14     | slr1658     |
| sub_network_2      | sll0522     | sub_network_5      | ssr0390     | sub_network_14     | slr1657     |
| sub_network_2      | sll8031     | sub_network_5      | slr1655     | sub_network_14     | sll0537     |
| sub_network_2      | slr0261     | sub_network_5      | slr1834     | sub_network_14     | slr1659     |
| sub_network_2      | sll1733     | sub_network_5      | ssr2831     | sub_network_14     | sll0536     |
| sub_network_2      | sll0521     | sub_network_5      | slr1835     | sub_network_15     | sll0319     |
| sub_network_2      | sll0026     | sub_network_5      | sll0629     | sub_network_15     | slr1505     |
| sub_network_2      | slr2007     | sub_network_5      | sll0819     | sub_network_15     | sll0320     |
| sub_network_2      | slr1291     | sub_network_5      | ssl0563     | sub_network_16     | sll0980     |
| sub_network_2      | slr0331     | sub_network_5      | smr0005     | sub_network_16     | slr0257     |
| sub_network_2      | ssr1386     | sub_network_5      | sml0008     | sub_network_16     | sll0981     |
| sub_network_2      | ssl1690     | sub_network_5      | slr0737     | sub_network_17     | sll0656     |
| sub_network_2      | sll1732     | sub_network_6      | sll1327     | sub_network_17     | sll0485     |
| sub_network_2      | slr1279     | sub_network_6      | sll1324     | sub_network_17     | sll0654     |
| sub_network_2      | slr0844     | sub_network_6      | sll1326     | sub_network_18     | sll1294     |
| sub_network_2      | slr2009     | sub_network_6      | slr1330     | sub_network_18     | sll1293     |
| sub_network_2      | sll0027     | sub_network_6      | sll1325     | sub_network_18     | sll1296     |

|               |         |               |         |                |         |
|---------------|---------|---------------|---------|----------------|---------|
| sub_network_2 | slI0519 | sub_network_6 | slr1329 | sub_network_19 | slr1064 |
| sub_network_2 | slI0520 | sub_network_6 | ssl2615 | sub_network_19 | slr1443 |
| sub_network_3 | ssl0020 | sub_network_6 | slI1322 | sub_network_19 | slr1063 |
| sub_network_3 | sml0004 | sub_network_6 | slI1323 |                |         |
